# Supplementary material for: Flatworm-specific transcriptional regulators promote the specification of tegumental progenitors in Schistosoma mansoni
Source: eLife. 2018 Mar 20;7:e33221. doi: 10.7554/eLife.33221 (PMC5927768; doi:10.7554/eLife.33221)
Supplement: Supplementary file 1. [file elife-33221-supp1.xlsx]

## Sheet: Neo_v_IR_Rest_DESeq2.csv
	baseMean	log2FoldChange	lfcSE	stat	pvalue	padj
Smp_200800	2707.12	-7.93659	0.373555	-21.2461	3.58285e-100	3.3539e-96	hypothetical protein
Smp_073300	679.353	7.27963	0.386254	18.8468	3.12408e-79	1.46223e-75	Chaperone protein DnaJ 1
Smp_157300	882.924	7.65332	0.412093	18.5718	5.43033e-77	1.69444e-73	basic fibroblast growth factor receptor 1 A
Smp_102160	1053.95	-3.48099	0.195484	-17.8071	6.22894e-71	1.45773e-67	vesicle associated membrane protein 1
Smp_138470	962.483	4.27443	0.24027	17.7901	8.43425e-71	1.57906e-67	hypothetical protein
Smp_043110	449.667	-4.15458	0.234592	-17.7099	3.52008e-70	5.4919e-67	hypothetical protein
Smp_058320	1808.51	2.29048	0.134145	17.0746	2.29237e-65	3.06555e-62	nuclear autoantigenic sperm protein
Smp_141160	150.561	6.89864	0.41846	16.4858	4.64054e-61	5.43001e-58	E3 ubiquitin protein ligase RNF168
Smp_082490	829.963	7.96821	0.484337	16.4518	8.14538e-61	7.62489e-58	G2:mitotic specific cyclin B2
Smp_045560	661.4	-5.36292	0.325951	-16.4532	7.96066e-61	7.62489e-58	annexin
Smp_009600	372.247	8.92332	0.566856	15.7418	7.82266e-56	6.65708e-53	serine:threonine protein kinase PLK1
Smp_056350	177.65	5.8604	0.372628	15.7272	9.84298e-56	7.37276e-53	mitotic spindle assembly checkpoint protein
Smp_002600	393.186	4.45282	0.283173	15.7247	1.02389e-55	7.37276e-53	Lysosomal Pro X carboxypeptidase
Smp_065150	246.813	8.49895	0.547075	15.5352	2.00306e-54	1.33933e-51	N acetyltransferase ESCO2
Smp_032500	594.208	5.54923	0.364426	15.2273	2.32864e-52	1.45322e-49	DNA replication licensing factor MCM7
Smp_005350	381.996	-4.50566	0.297311	-15.1547	7.05343e-52	4.1267e-49	Calcium binding protein
Smp_179320	1478.57	7.71884	0.509721	15.1433	8.39314e-52	4.3649e-49	Argonaute
Smp_129010	500.391	6.91707	0.456746	15.1442	8.27227e-52	4.3649e-49	hypothetical protein
Smp_028670	556.202	-4.19112	0.277467	-15.1049	1.50362e-51	7.40812e-49	carbonic anhydrase II
Smp_051920	1054.47	10.195	0.679295	15.0082	6.48746e-51	3.03646e-48	nanos 1
Smp_136400	1310.51	-3.82706	0.256492	-14.9208	2.41512e-50	1.07657e-47	cytochrome b 561
Smp_086860	439.524	8.25992	0.553872	14.9131	2.71074e-50	1.15342e-47	histone H2A
Smp_134550	2916.8	-6.25699	0.421907	-14.8303	9.33768e-50	3.80044e-47	hypothetical protein
Smp_006860	471.37	-4.61649	0.312629	-14.7667	2.40271e-49	9.37159e-47	PDZ and LIM domain protein Zasp
Smp_026230	2665.53	-6.48618	0.44128	-14.6985	6.58599e-49	2.46606e-46	hypothetical protein
Smp_072560	260.969	6.90772	0.477141	14.4773	1.68569e-47	6.06915e-45	hypothetical protein
Smp_125810	386.607	7.0288	0.487406	14.4208	3.8272e-47	1.3269e-44	zinc finger protein 112
Smp_142050	318.86	-5.78592	0.401545	-14.4091	4.53352e-47	1.51565e-44	Serine/Threonine Kinase, CMGC Group, MAPK family, ERK subfamily
Smp_145300	1620.67	-4.35622	0.302701	-14.3912	5.87943e-47	1.89784e-44	peptidylglycine alpha hydroxylating mono-oxygenase
Smp_145810	235.736	4.74911	0.330468	14.3709	7.88383e-47	2.46002e-44	poly (adp ribose) polymerase 2
Smp_201600	2296.4	-6.46081	0.450044	-14.3559	9.77885e-47	2.9529e-44	hypothetical protein
Smp_016870	261.077	8.80169	0.613513	14.3464	1.12237e-46	3.28327e-44	protein regulator of cytokinesis 1
Smp_004190	1669.08	-4.81268	0.336083	-14.3199	1.64284e-46	4.66018e-44	cationic amino acid transporter 4
Smp_021590	342.767	9.47977	0.667089	14.2106	7.86936e-46	2.16662e-43	Rac GTPase activating protein 1
Smp_087250	264.085	-5.35273	0.376735	-14.2082	8.15048e-46	2.17991e-43	muscle LIM protein
Smp_074150	1571.02	-5.00069	0.353123	-14.1613	1.58915e-45	4.13222e-43	annexin
Smp_201030	295.882	-4.87179	0.345096	-14.1172	2.97557e-45	7.5282e-43	lung cancer oncogene 5
Smp_176260	355.335	8.41425	0.598978	14.0477	7.96045e-45	1.96099e-42	hypothetical protein
Smp_086330	570.977	-4.76455	0.343519	-13.8698	9.64906e-44	2.31602e-41	Myophilin
Smp_180600	248.866	-5.85528	0.425002	-13.7771	3.50242e-43	8.19653e-41	Insulin growth factor binding protein 7
Smp_031300	319.845	-4.67176	0.340978	-13.7011	1.00029e-42	2.28384e-40	universal stress protein
Smp_132950	158.747	8.78391	0.642408	13.6734	1.46359e-42	3.26206e-40	hypothetical protein
Smp_137990	268.303	-5.12001	0.375216	-13.6455	2.14739e-42	4.67482e-40	complexin
Smp_094140	737.245	4.41849	0.326702	13.5245	1.12031e-41	2.38346e-39	DNA replication licensing factor MCM6
Smp_129410	209.114	8.24884	0.621438	13.2738	3.28526e-40	6.83407e-38	hypothetical protein
Smp_005880	793.511	-4.7228	0.358776	-13.1636	1.42069e-39	2.89111e-37	phosphoenolpyruvate carboxykinase
Smp_161930	1651.93	-5.26237	0.400682	-13.1335	2.11556e-39	4.21356e-37	actin
Smp_128200	326.527	6.83812	0.522026	13.0992	3.32786e-39	6.49002e-37	kinesin protein kif23
Smp_147680	204.745	-4.7932	0.367969	-13.0261	8.69512e-39	1.66112e-36	DNA supercoiling factor
Smp_012810	149.752	-5.2753	0.406877	-12.9653	1.92421e-38	3.60252e-36	Four and a half LIM domains protein 3
Smp_048380	116.381	-5.86619	0.457995	-12.8084	1.47067e-37	2.69939e-35	hypothetical protein
Smp_018290	245.193	4.07258	0.318055	12.8046	1.54439e-37	2.7802e-35	serine:threonine protein kinase 17A
Smp_149260	123.919	8.25298	0.646961	12.7565	2.86716e-37	5.06405e-35	kinesin family 1
Smp_028360	352.361	-3.46214	0.276317	-12.5296	5.14025e-36	8.91072e-34	tubulin epsilon chain
Smp_172530	480.063	6.63442	0.532557	12.4577	1.27026e-35	2.15039e-33	DNA replication licensing factor MCM4
Smp_168730	275.409	-3.43522	0.275774	-12.4567	1.28642e-35	2.15039e-33	carbonic anhydrase
Smp_047400	136.829	5.85363	0.471415	12.4171	2.10955e-35	3.46447e-33	hypothetical protein
Smp_119910	94.2491	7.67415	0.621733	12.3432	5.30271e-35	8.55839e-33	#N/A
Smp_132670	727.704	-4.84737	0.393478	-12.3193	7.13012e-35	1.13127e-32	myosin regulatory light chain 2 smooth muscle
Smp_170450	1575.06	-2.43149	0.197454	-12.3142	7.59406e-35	1.1848e-32	sodium:potassium:calcium exchanger
Smp_018260	724.956	-3.12779	0.255563	-12.2389	1.92736e-34	2.95771e-32	glycogen synthase
Smp_054010	125.992	5.43034	0.444041	12.2294	2.16641e-34	3.27093e-32	y+l amino acid transporter 2
Smp_203190	5428.08	-5.70605	0.466639	-12.228	2.2037e-34	3.27442e-32	hypothetical protein
Smp_078690	485.842	-5.14464	0.422914	-12.1647	4.78928e-34	7.00508e-32	calponin
Smp_213940	413.033	3.75383	0.311147	12.0645	1.62631e-33	2.34214e-31	gamma-tubulin complex, putative
Smp_042160	8239.9	-4.09011	0.339547	-12.0458	2.041e-33	2.89481e-31	fructose-bisphosphate aldolase
Smp_197370	316.36	-4.48975	0.372932	-12.0391	2.21444e-33	3.09394e-31	hypothetical protein
Smp_080730	697.17	5.79346	0.481325	12.0365	2.28539e-33	3.14611e-31	cyclin dependent kinase 1
Smp_137940	344.65	-3.91853	0.325814	-12.0269	2.56646e-33	3.48183e-31	guanylate kinase
Smp_129240	1920.2	-5.11143	0.426204	-11.9929	3.87003e-33	5.17534e-31	hypothetical protein
Smp_042740	366.341	-4.18139	0.349405	-11.9672	5.27953e-33	6.9608e-31	spag6
Smp_018250	684.734	-5.42094	0.455199	-11.9089	1.06331e-32	1.38245e-30	troponin i
Smp_087010	256.296	2.74962	0.23102	11.9021	1.1537e-32	1.47942e-30	DNA polymerase delta catalytic subunit
Smp_143270	2346.67	-5.88648	0.496461	-11.8569	1.9822e-32	2.50749e-30	hypothetical protein
Smp_205110	205.812	-4.72623	0.401713	-11.7652	5.90016e-32	7.36419e-30	p2X purinoceptor 4
Smp_147970	162.916	3.44436	0.292796	11.7637	6.00523e-32	7.3967e-30	kinesin protein KIF14
Smp_133600	1161.2	-3.85911	0.32854	-11.7463	7.38187e-32	8.97424e-30	hypothetical protein
Smp_194820	144.6	9.12382	0.779503	11.7047	1.20636e-31	1.44779e-29	dna repair and recombination protein rad54
Smp_067260	168.193	7.21497	0.616976	11.6941	1.3664e-31	1.6191e-29	dna polymerase alpha subunit b
Smp_045220	656.99	-4.71767	0.404303	-11.6686	1.8437e-31	2.15736e-29	myosin light chain
Smp_081470	185.106	-5.10646	0.441496	-11.5663	6.10845e-31	7.05941e-29	hypothetical protein
Smp_149320	358.897	-3.6357	0.315166	-11.5358	8.70633e-31	9.93902e-29	tricarboxylate transport protein
Smp_200240	615.965	-3.33454	0.29002	-11.4976	1.356e-30	1.52934e-28	universal stress protein
Smp_194770	1079	-2.90577	0.252847	-11.4922	1.44347e-30	1.60861e-28	taurocyamine kinase
Smp_144910	224.26	-4.01349	0.349653	-11.4785	1.69231e-30	1.86373e-28	collagen type I:II:III:V:XI alpha
Smp_136930	270.817	-4.50409	0.392498	-11.4755	1.75248e-30	1.90756e-28	hypothetical protein
Smp_163840	1080.59	-4.42675	0.386265	-11.4604	2.08507e-30	2.24349e-28	protein fam79a
Smp_135560	236.108	-4.89367	0.427152	-11.4565	2.1812e-30	2.32025e-28	collagen alpha 2(I) chain
Smp_131890	788.804	3.54076	0.30986	11.427	3.0667e-30	3.22555e-28	sodium:chloride dependent transporter
Smp_027430	92.3449	-5.50334	0.482385	-11.4086	3.78768e-30	3.93961e-28	EF hand domain containing family member A2
Smp_124240	825.157	-4.17973	0.366543	-11.4031	4.03474e-30	4.15046e-28	sodium:potassium dependent atpase beta subunit
Smp_026560	2992.85	-2.99106	0.262344	-11.4013	4.12008e-30	4.19218e-28	calmodulin
Smp_096480	296.847	-4.86471	0.427195	-11.3875	4.82392e-30	4.85556e-28	glycine receptor subunit beta
Smp_068280	313.737	-4.42864	0.389206	-11.3787	5.34195e-30	5.31978e-28	prolyl 4 hydroxylase subunit alpha 2
Smp_052390	166.32	4.95354	0.435566	11.3726	5.72257e-30	5.63884e-28	origin recognition complex subunit 5
Smp_203500	166.728	-4.11694	0.363779	-11.3172	1.07906e-29	1.05219e-27	allatostatin receptor
Smp_004710	2542.34	-5.73736	0.50797	-11.2947	1.39426e-29	1.34553e-27	hypothetical protein
Smp_092150	361.17	-5.97246	0.529317	-11.2833	1.58635e-29	1.51529e-27	hypothetical protein
Smp_179710	173.857	6.46435	0.573099	11.2796	1.65423e-29	1.56417e-27	Maternal Effect Lethal family member (mel 32)
Smp_001610	189.867	-3.88761	0.344817	-11.2744	1.75491e-29	1.64278e-27	radial spoke head protein 9
Smp_199870	71.8516	6.43279	0.570676	11.2722	1.79956e-29	1.66789e-27	hypothetical protein
Smp_134380	177.905	-6.38967	0.568209	-11.2453	2.44311e-29	2.24215e-27	hypothetical protein
Smp_174910	1814.08	3.74933	0.333651	11.2373	2.67488e-29	2.40765e-27	importin subunit alpha 2
Smp_009030	1145.96	2.7041	0.240628	11.2377	2.66375e-29	2.40765e-27	ribonucleoside diphosphate reductase large
Smp_088240	958.441	-3.10558	0.277399	-11.1954	4.29682e-29	3.83071e-27	hypothetical protein
Smp_059820	152.596	-4.55637	0.407589	-11.1788	5.17679e-29	4.57169e-27	hypothetical protein
Smp_154080	126.302	9.23259	0.827491	11.1573	6.59435e-29	5.76913e-27	hypothetical protein
Smp_106110	265.252	-4.68192	0.419701	-11.1554	6.74137e-29	5.84314e-27	Kv channel interacting protein 4
Smp_150020	147.943	-4.44498	0.400221	-11.1063	1.16901e-28	1.00396e-26	Amyloid beta A4 protein binding family
Smp_140000	295.118	-3.98325	0.359167	-11.0902	1.39928e-28	1.19078e-26	tetraspanin CD63 receptor
Smp_126540	317.936	-5.03123	0.454891	-11.0603	1.95408e-28	1.64794e-26	hypothetical protein
Smp_006040	369.076	-4.16459	0.377702	-11.0261	2.85883e-28	2.38942e-26	hypothetical protein
Smp_158930	540.788	3.77439	0.343903	10.9752	5.03196e-28	4.16851e-26	hypothetical protein
Smp_012440	600.067	-3.07191	0.280773	-10.9409	7.3475e-28	6.03332e-26	glucose transport protein
Smp_046810	374.789	3.13156	0.286323	10.9371	7.65912e-28	6.23452e-26	m phase inducer phosphatase(cdc25)
Smp_047620	133.855	4.96619	0.4543	10.9315	8.14649e-28	6.57408e-26	G2:mitotic specific cyclin B3
Smp_166300	343.615	-3.99242	0.365638	-10.9191	9.34593e-28	7.47754e-26	hypothetical protein
Smp_141430	81.4846	7.03401	0.644862	10.9078	1.05812e-27	8.39412e-26	hypothetical protein
Smp_173010	237.062	-4.89754	0.449739	-10.8897	1.2901e-27	1.01484e-25	neuropeptide receptor a
Smp_179810	494.488	-3.77953	0.350508	-10.783	4.14212e-27	3.2312e-25	oncosphere protein tso22e
Smp_085490	328.21	2.18349	0.202744	10.7697	4.78812e-27	3.70427e-25	hypothetical protein
Smp_054610	172	7.56922	0.703544	10.7587	5.39255e-27	4.13768e-25	WD repeat and HMG box DNA binding protein 1
Smp_154090	153.287	5.82746	0.543228	10.7275	7.56421e-27	5.7568e-25	protein of unknown function DUF729
Smp_059670	1415.48	-4.10021	0.383393	-10.6945	1.0795e-26	8.14934e-25	synaptogyrin 2
Smp_153200	84.5778	-6.02865	0.564227	-10.6848	1.19894e-26	8.97864e-25	rhodopsin orphan GPCR
Smp_145470	175.847	9.45265	0.889017	10.6327	2.09964e-26	1.5599e-24	zinc finger protein
Smp_121660	629.523	-4.75683	0.447858	-10.6213	2.37255e-26	1.74878e-24	IDL peptide
Smp_064430	165.821	-4.37283	0.413927	-10.5643	4.36411e-26	3.1916e-24	hypothetical protein
Smp_198890	308.826	-5.66582	0.536869	-10.5535	4.89653e-26	3.55321e-24	hypothetical protein
Smp_202260	821.248	-5.75415	0.545558	-10.5473	5.22884e-26	3.75852e-24	hypothetical protein
Smp_200440	676.586	-6.36356	0.603369	-10.5467	5.25976e-26	3.75852e-24	hypothetical protein
Smp_074590	678.899	-3.66745	0.349715	-10.487	9.91653e-26	7.03247e-24	hypothetical protein
Smp_164040	195.372	6.93537	0.662326	10.4712	1.17115e-25	8.24297e-24	hypothetical protein
Smp_140240	233.758	3.36711	0.321887	10.4605	1.31117e-25	9.15962e-24	hypothetical protein
Smp_166150	169.894	6.24882	0.597544	10.4575	1.3538e-25	9.30063e-24	maternal embryonic leucine zipper kinase
Smp_149820	110.824	-5.01114	0.479178	-10.4578	1.34957e-25	9.30063e-24	glycoprotein N acetylgalactosamine
Smp_170740	1447.26	-5.99086	0.572905	-10.457	1.36117e-25	9.30063e-24	hypothetical protein
Smp_142030	94.5011	-3.28004	0.313961	-10.4473	1.50774e-25	1.02275e-23	5' AMP activated protein kinase subunit gamma
Smp_128580	131.539	-5.85585	0.561171	-10.4351	1.71513e-25	1.15506e-23	pikachurin
Smp_159230	1008.62	-4.86503	0.466841	-10.4212	1.98512e-25	1.32734e-23	synaptic vesicle membrane protein VAT 1
Smp_161820	67.5096	4.93685	0.473943	10.4165	2.08388e-25	1.38349e-23	hypothetical protein
Smp_022340	488.781	-5.06184	0.486206	-10.4109	2.21137e-25	1.45779e-23	PDZ and LIM domain protein Zasp
Smp_135890	109.901	6.15303	0.59121	10.4075	2.29108e-25	1.49978e-23	hypothetical protein
Smp_124230	163.027	3.72173	0.358498	10.3814	3.0122e-25	1.94464e-23	dna repair protein rad51 1
Smp_182620	120.92	-4.01246	0.386493	-10.3817	3.00322e-25	1.94464e-23	carboxypeptidase N, polypeptide 1, 50kD
Smp_073270	2709.61	-4.83967	0.466275	-10.3794	3.07618e-25	1.97234e-23	neuroendocrine protein 7b2
Smp_148590	103.638	4.64376	0.447611	10.3746	3.2373e-25	2.06152e-23	hypothetical protein
Smp_079560	279.64	6.26634	0.606821	10.3265	5.34716e-25	3.38208e-23	DNA replication licensing factor MCM2
Smp_079480	124.432	-4.24347	0.41114	-10.3212	5.64935e-25	3.54923e-23	hypothetical protein
Smp_039300	94.9941	-4.5879	0.444584	-10.3195	5.74958e-25	3.58812e-23	E3 ubiquitin protein ligase TRIM56
Smp_141480	165.119	-6.09293	0.596506	-10.2144	1.70995e-24	1.06006e-22	hypothetical protein
Smp_157950	177.342	-3.65271	0.357745	-10.2104	1.78163e-24	1.09722e-22	glycogenin
Smp_139530	258.725	7.52788	0.737787	10.2033	1.91606e-24	1.1723e-22	tumor protein p73
Smp_164950	265.364	3.40188	0.333777	10.1921	2.15067e-24	1.3073e-22	hypothetical protein
Smp_024370	1958.03	-3.10728	0.30662	-10.134	3.905e-24	2.35837e-22	hypothetical protein
Smp_126730	79.9094	-5.47209	0.543218	-10.0735	7.23743e-24	4.34292e-22	biogenic amine (5HT) receptor
Smp_137390	214.518	6.28238	0.623907	10.0694	7.5423e-24	4.49704e-22	histone RNA hairpin binding protein
Smp_158950	106.992	7.92233	0.787359	10.0619	8.14068e-24	4.8231e-22	serine:threonine protein kinase haspin
Smp_071390	1687.25	-2.4278	0.242043	-10.0304	1.12025e-23	6.59537e-22	adenylate kinase
Smp_167880	387.573	2.42479	0.242042	10.018	1.26986e-23	7.42946e-22	Acidic repeat containing protein
Smp_143750	207.837	3.66271	0.366104	10.0046	1.45538e-23	8.46202e-22	transmembrane protein 63A
Smp_137410	134.669	-3.65289	0.365215	-10.002	1.49296e-23	8.62691e-22	calpain A
Smp_037960	334.43	-4.21281	0.421499	-9.99483	1.60568e-23	9.2213e-22	neuronal acetylcholine receptor subunit alpha 4
Smp_086220	177.737	3.64877	0.366846	9.94634	2.61629e-23	1.49336e-21	hypothetical protein
Smp_040350	171.273	2.77898	0.280058	9.92289	3.31039e-23	1.87809e-21	DNA binding protein RFX7
Smp_033700	228.879	3.7212	0.375408	9.91241	3.67666e-23	2.07333e-21	deoxyribodipyrimidine photo lyase
Smp_146280	731.561	-5.97461	0.602823	-9.91105	3.72699e-23	2.08912e-21	calbindin 32
Smp_046280	183.556	5.56314	0.561775	9.90279	4.04804e-23	2.25558e-21	actin binding protein anillin
Smp_083990	355.777	-3.00129	0.303378	-9.89289	4.46921e-23	2.47552e-21	cationic amino acid transporter
Smp_095630	1877.41	-2.7625	0.279327	-9.88985	4.60711e-23	2.53689e-21	Tetraspanin,IPR000301 CD9:CD37:CD63
Smp_028490	273.777	6.00417	0.609058	9.85813	6.32181e-23	3.46073e-21	1 acyl sn glycerol 3 phosphate acyltransferase
Smp_044680	611.362	1.83751	0.186643	9.84506	7.19994e-23	3.91852e-21	hypothetical protein
Smp_047650	115.207	-3.73101	0.379322	-9.83598	7.87935e-23	4.2635e-21	Ferritin-2 heavy chain
Smp_129900	196.099	-4.13795	0.421114	-9.82621	8.68273e-23	4.67121e-21	sodium and chloride dependent GABA transporter
Smp_151010	379.945	-3.04516	0.310389	-9.81078	1.01183e-22	5.41243e-21	monocarboxylate transporter
Smp_019620	228.517	3.15003	0.321977	9.7834	1.32682e-22	7.05703e-21	hypothetical protein
Smp_157400	65.4712	4.7257	0.484581	9.75213	1.80641e-22	9.55356e-21	family M13 unassigned peptidase (M13 family)
Smp_031390	61.1745	-6.96283	0.714464	-9.74554	1.92752e-22	1.01368e-20	hypothetical protein
Smp_135360	97.6438	7.1556	0.736232	9.71923	2.49674e-22	1.30102e-20	serine:threonine protein kinase 12 B
Smp_143490	577.361	5.16895	0.531839	9.71902	2.5017e-22	1.30102e-20	DNA replication licensing factor MCM5
Smp_146150	116.368	-4.17891	0.430075	-9.71669	2.55978e-22	1.32387e-20	dexamethasone induced Ras protein 1
Smp_068720	165.994	4.33812	0.447092	9.70296	2.92884e-22	1.50642e-20	Formin Homology 2 Domain containing protein
Smp_076400	90.6436	-4.08419	0.420954	-9.70222	2.95002e-22	1.50903e-20	universal stress protein
Smp_015030	155.403	-3.73921	0.385445	-9.70103	2.98479e-22	1.51851e-20	ethanolamine kinase 1
Smp_023830	227.479	-4.96271	0.511705	-9.69838	3.06321e-22	1.54998e-20	hypothetical protein
Smp_086830	323.809	-4.99095	0.516402	-9.66486	4.25191e-22	2.1399e-20	mechanosensory protein 2
Smp_200190	685.934	-2.75778	0.285417	-9.66229	4.35991e-22	2.18252e-20	lung cancer oncogene 5
Smp_026400	47.9692	8.3719	0.867662	9.64881	4.97312e-22	2.47624e-20	thyrotroph embryonic factor
Smp_180870	55.3672	-6.48713	0.673015	-9.63892	5.47617e-22	2.7123e-20	carbonic anhydrase
Smp_030870	156.382	-4.08574	0.42398	-9.63663	5.59962e-22	2.75885e-20	interleukin 1 receptor associated kinase
Smp_148640	40.853	-6.59655	0.685791	-9.61889	6.65425e-22	3.26128e-20	hypothetical protein
Smp_044950	419.85	2.56582	0.267243	9.6011	7.90989e-22	3.85649e-20	fibroblast growth factor receptor substrate 3
Smp_128160	40.8335	7.6314	0.795288	9.59577	8.32959e-22	4.04007e-20	CST complex subunit STN1
Smp_162520	226.139	-6.14938	0.641878	-9.5803	9.6766e-22	4.66921e-20	protocadherin fat 4
Smp_136710	172.09	-5.78431	0.604152	-9.57426	1.02589e-21	4.92479e-20	calcium transporting atpase
Smp_034120	1195.4	-3.07995	0.321775	-9.57175	1.05115e-21	5.02032e-20	synaptosomal associated protein 23 kDa
Smp_068500	3817.93	-5.05438	0.529007	-9.55447	1.24217e-21	5.9025e-20	hypothetical protein
Smp_127670	63.9796	7.81842	0.818869	9.54782	1.32449e-21	6.26188e-20	hypothetical protein
Smp_143460	173.527	6.21524	0.65106	9.54633	1.3437e-21	6.32077e-20	disks large associated protein 5
Smp_167810	120.283	3.47394	0.364551	9.52936	1.58254e-21	7.37023e-20	family C50 non peptidase ue (C50 family)
Smp_123670	954.394	3.03385	0.318352	9.52986	1.57492e-21	7.37023e-20	lysosomal acid phosphatase
Smp_020340	149.299	-4.39364	0.462532	-9.4991	2.11703e-21	9.81065e-20	alpha glucosidase
Smp_150650	434.048	-4.44116	0.467589	-9.498	2.13959e-21	9.86635e-20	hypothetical protein
Smp_149720	228.938	-3.98523	0.421008	-9.46592	2.90997e-21	1.33531e-19	hypothetical protein
Smp_129710	104.135	7.85212	0.831198	9.44675	3.49505e-21	1.59596e-19	Uveal autoantigen with coiled coil domains
Smp_176000	71.7624	7.53247	0.797668	9.44312	3.61839e-21	1.64426e-19	abnormal spindle microcephaly associated
Smp_132070	517.014	-4.6336	0.491097	-9.43521	3.90209e-21	1.76461e-19	nAChR subunit
Smp_046500	1614.93	3.29294	0.349079	9.43324	3.97617e-21	1.78858e-19	proliferating cell nuclear antigen
Smp_121390	42.5792	-5.13515	0.544394	-9.43279	3.9933e-21	1.78858e-19	hypothetical protein
Smp_056060	49.1109	-6.04667	0.641321	-9.42846	4.16135e-21	1.85497e-19	rhodopsin orphan GPCR
Smp_091460	1864.33	-3.16449	0.335902	-9.42088	4.47333e-21	1.98459e-19	glutamine synthetase
Smp_164380	137.566	-4.60006	0.488647	-9.41388	4.78159e-21	2.11134e-19	protein KINase family member (kin 1)
Smp_204230	152.386	-4.4176	0.47041	-9.39095	5.94588e-21	2.61312e-19	hypothetical protein
Smp_010820	1050.95	-4.30296	0.459119	-9.3722	7.1034e-21	3.10724e-19	peptidyl-alpha-hydroxyglycine alpha-amidating lyase
Smp_172480	401.609	2.28873	0.244238	9.37093	7.18996e-21	3.13048e-19	Krueppel factor 10 like
Smp_153520	229.06	6.18208	0.661338	9.34784	8.94565e-21	3.87686e-19	protein ect2
Smp_125760	66.2066	6.01876	0.645114	9.32977	1.061e-20	4.57698e-19	denticleless protein
Smp_146940	114.089	-4.79737	0.514495	-9.32444	1.11573e-20	4.79099e-19	innexin
Smp_098340	98.7207	-4.88453	0.524051	-9.32072	1.15548e-20	4.93903e-19	gamma glutamylcyclotransferase
Smp_194280	526.76	-5.34135	0.573389	-9.31541	1.21483e-20	5.16912e-19	hypothetical protein
Smp_212780	70.83	-4.89324	0.525471	-9.31212	1.25308e-20	5.30774e-19	Tubulin polymerization-promoting protein (TPPP), putative
Smp_157190	42.8622	8.24817	0.887544	9.29325	1.49645e-20	6.31003e-19	hypothetical protein
Smp_114620	141.178	-3.69303	0.398152	-9.27542	1.76924e-20	7.42683e-19	adenosinetriphosphatase
Smp_141880	37.4488	-6.0107	0.648072	-9.27473	1.78062e-20	7.44123e-19	neuropeptides capa receptor
Smp_012920	76.8401	-6.06131	0.654406	-9.26232	2.00046e-20	8.32282e-19	class A rhodopsin G protein coupled
Smp_105360	50.9706	7.93619	0.857113	9.25921	2.05959e-20	8.53089e-19	neurogenic locus notch protein
Smp_080210	151.128	-4.01567	0.434433	-9.24347	2.38635e-20	9.84078e-19	alpha tocopherol transfer protein
Smp_210100	150.412	-3.79251	0.41108	-9.2257	2.81708e-20	1.15661e-18	mechanosensory protein 2
Smp_035040	240.729	-5.47725	0.594601	-9.21163	3.21204e-20	1.31301e-18	hypothetical protein
Smp_169220	330.577	-5.8328	0.634268	-9.19612	3.71102e-20	1.51038e-18	hypothetical protein
Smp_001000	574.668	-3.14472	0.342265	-9.18797	4.00323e-20	1.62226e-18	universal stress protein
Smp_047610	150.124	5.87719	0.641373	9.16345	5.02637e-20	2.0281e-18	cell division control protein 45
Smp_078230	319.445	-5.08601	0.555263	-9.15964	5.20705e-20	2.09198e-18	cGMP dependent protein kinase, isozyme 2 forms
Smp_085410	184.928	-4.16233	0.454751	-9.153	5.5376e-20	2.21528e-18	Transmembrane protein 45B
Smp_126240	181.003	-4.02635	0.440525	-9.1399	6.25126e-20	2.49013e-18	twitchin
Smp_164590	113.159	-4.90355	0.536617	-9.13789	6.36845e-20	2.52606e-18	fibrillar collagen chain FAp1 alpha
Smp_134140	247.533	-4.60622	0.505029	-9.1207	7.46429e-20	2.94824e-18	cAMP specific 3',5' cyclic phosphodiesterase 4D
Smp_169860	73.3047	-7.08543	0.777729	-9.11041	8.20697e-20	3.22796e-18	normocyte binding protein 1
Smp_173730	311.277	-2.16878	0.238295	-9.10126	8.92882e-20	3.49718e-18	hypothetical protein
Smp_000320	79.8044	-4.64338	0.510304	-9.09926	9.09525e-20	3.54753e-18	hypothetical protein
Smp_151600	62.7314	-6.78256	0.7455	-9.098	9.20082e-20	3.57381e-18	neuronal calcium sensor 2
Smp_154600	140.209	-4.63719	0.510717	-9.07976	1.08812e-19	4.20903e-18	acetylcholinesterase
Smp_134960	54.2198	-4.04437	0.445827	-9.0716	1.17278e-19	4.51786e-18	peptide (allatostatin:somatostatin)
Smp_049610	72.245	-3.84159	0.423636	-9.06815	1.21055e-19	4.64426e-18	Meckel syndrome type 1 protein
Smp_051410	103.764	-3.06403	0.338185	-9.06021	1.30194e-19	4.97447e-18	claudin protein
Smp_040020	135.332	3.39171	0.374421	9.05855	1.322e-19	5.03059e-18	histone H3
Smp_170010	108.21	-5.24974	0.579821	-9.05406	1.37746e-19	5.22042e-18	radial spoke 3
Smp_196840	176.198	-4.04364	0.446797	-9.05027	1.42613e-19	5.38308e-18	collagen alpha 1(II) chain
Smp_163970	521.176	2.99761	0.331792	9.03461	1.64582e-19	6.18736e-18	lysosomal protective protein
Smp_139980	43.7591	-5.3271	0.590672	-9.01871	1.90309e-19	7.12593e-18	RNA binding protein fox 1 3
Smp_162190	74.1405	-3.70981	0.411613	-9.01286	2.00744e-19	7.4867e-18	cysteine and glycine rich protein 2
Smp_062560	250.067	-5.74542	0.637574	-9.01137	2.03495e-19	7.55921e-18	secreted frizzled protein
Smp_075110	113.685	4.41556	0.490625	8.99988	2.25963e-19	8.34132e-18	cell cycle checkpoint protein rad1
Smp_046120	294.22	-6.67179	0.741335	-8.9997	2.26332e-19	8.34132e-18	vesicular acetylcholine transporter
Smp_129220	164.175	-4.89026	0.543707	-8.99429	2.37755e-19	8.72792e-18	hypothetical protein
Smp_151360	81.8863	4.67514	0.520785	8.97709	2.78015e-19	1.0166e-17	hypothetical protein
Smp_199090	198.535	-4.09949	0.456747	-8.97541	2.82292e-19	1.02823e-17	peptidyl glycine alpha amidating
Smp_170380	215.315	3.14659	0.350794	8.96992	2.96729e-19	1.07662e-17	hypothetical protein
Smp_181270	133.472	-3.9364	0.440232	-8.94165	3.83402e-19	1.38572e-17	protein couch potato
Smp_200530	1287.01	-3.18709	0.357629	-8.91173	5.02411e-19	1.80658e-17	hypothetical protein
Smp_179310	287.68	-4.90025	0.549883	-8.91145	5.03704e-19	1.80658e-17	P2X ATP gated ion channel
Smp_099640	84.3757	-6.45671	0.725243	-8.90282	5.4447e-19	1.94534e-17	p2X purinoceptor 4
Smp_174040	239.461	-3.66868	0.412208	-8.90008	5.58068e-19	1.98634e-17	lachesin
Smp_027920	514.349	4.15538	0.467001	8.89802	5.68542e-19	2.01596e-17	Tubulin alpha 1 chain
Smp_141290	1630.1	2.10405	0.236577	8.89375	5.90819e-19	2.08704e-17	innexin
Smp_004060	271.924	5.49361	0.618179	8.88675	6.29207e-19	2.21429e-17	cell division cycle 20
Smp_066900	752.695	1.97885	0.222763	8.88321	6.49572e-19	2.27739e-17	innexin unc 9
Smp_004440	141.835	-6.18559	0.696388	-8.88238	6.54448e-19	2.28593e-17	hypothetical protein
Smp_176410	62.6884	-5.858	0.659628	-8.88077	6.64009e-19	2.3107e-17	f box:lrr repeat protein 7
Smp_105020	365.426	-5.39948	0.608137	-8.87873	6.76307e-19	2.34478e-17	titin
Smp_211020	228.488	-5.1729	0.584136	-8.85565	8.31955e-19	2.87377e-17	cell adhesion molecule
Smp_140250	113.295	-5.69314	0.643033	-8.85358	8.47585e-19	2.917e-17	G protein coupled receptor fragment
Smp_171720	1269.65	2.3656	0.267359	8.84803	8.90792e-19	3.05447e-17	lipid phosphate phosphohydrolase 1
Smp_142160	796.252	-4.05543	0.458548	-8.84408	9.22845e-19	3.15283e-17	hypothetical protein
Smp_128590	89.8205	-6.33355	0.716455	-8.84012	9.56125e-19	3.25465e-17	laminin gamma 3 chain
Smp_081900	1125.77	-3.18185	0.360504	-8.82611	1.08384e-18	3.67603e-17	hypothetical protein
Smp_074040	490.829	2.19854	0.249149	8.8242	1.1025e-18	3.7258e-17	hypothetical protein
Smp_162440	141.42	-6.63463	0.752143	-8.82098	1.13467e-18	3.82073e-17	mechanosensory protein 2
Smp_151730	121.643	-3.43249	0.389376	-8.81536	1.19298e-18	4.00269e-17	Rhabdoid tumor deletion region protein 1
Smp_122900	179.134	-3.97112	0.450992	-8.8053	1.30497e-18	4.36281e-17	beta arrestin
Smp_136160	227.388	2.69782	0.306606	8.79898	1.38071e-18	4.59958e-17	hypothetical protein
Smp_167940	202.43	2.80156	0.318676	8.79125	1.47903e-18	4.90964e-17	wee1 protein kinase 2
Smp_173740	197.574	-2.26515	0.25837	-8.76709	1.83338e-18	6.06441e-17	hypothetical protein
Smp_049270	521.069	-4.18662	0.478652	-8.74669	2.19707e-18	7.24182e-17	Major egg antigen (p40)
Smp_026030	31.1585	6.96691	0.796563	8.74622	2.20627e-18	7.24663e-17	DNA repair and recombination protein RAD54B
Smp_077980	2346.14	-3.44795	0.394248	-8.74564	2.21761e-18	7.25842e-17	neuroendocrine convertase 2
Smp_158620	272.8	-3.27255	0.374372	-8.74144	2.30166e-18	7.50726e-17	retinaldehyde binding protein
Smp_124300	1011.66	2.94965	0.337908	8.72913	2.5665e-18	8.342e-17	Lamin B receptor (ERG24)
Smp_051120	104.052	-3.65661	0.418978	-8.72745	2.60488e-18	8.43746e-17	hypothetical protein
Smp_076600	90.2988	4.55718	0.523187	8.71043	3.02728e-18	9.77184e-17	transcription factor SOX 14
Smp_123080	83.7472	-5.42766	0.624412	-8.69244	3.54749e-18	1.14117e-16	sarcoplasmic calcium binding protein
Smp_128870	147.931	5.49125	0.632054	8.68795	3.69054e-18	1.18312e-16	nibrin
Smp_158170	111.61	-4.96901	0.572088	-8.68575	3.76267e-18	1.20213e-16	hypothetical protein
Smp_135060	41.0157	7.16534	0.825578	8.67918	3.98641e-18	1.26928e-16	bollus pemphigoid antigen
Smp_122500	421.268	-3.79136	0.436856	-8.67873	4.00214e-18	1.26997e-16	hypothetical protein
Smp_011560	533.126	-2.45011	0.283405	-8.64523	5.36952e-18	1.69811e-16	tetraspanin CD63 receptor
Smp_079010	1982.99	-2.36388	0.27347	-8.64402	5.42676e-18	1.71043e-16	cAMP dependent protein kinase type II regulatory
Smp_073280	350.309	-4.43399	0.513107	-8.64145	5.55042e-18	1.74354e-16	hypothetical protein
Smp_027300	276.092	2.28811	0.265051	8.63273	5.99073e-18	1.87556e-16	histone lysine N methyltransferase SUV39H2
Smp_134720	136.483	-3.78263	0.439486	-8.60694	7.50366e-18	2.34139e-16	hypothetical protein
Smp_164070	48.6765	-3.42624	0.398174	-8.60489	7.63893e-18	2.37568e-16	hypothetical protein
Smp_136620	326.985	-4.88724	0.56825	-8.6005	7.93706e-18	2.46023e-16	hypothetical protein
Smp_000090	82.5607	-3.50864	0.40828	-8.59371	8.42066e-18	2.60151e-16	hypothetical protein
Smp_019760	134.012	3.65384	0.425374	8.5897	8.7193e-18	2.68491e-16	helicase polq
Smp_153780	251.339	-5.48503	0.641063	-8.55615	1.16701e-17	3.58177e-16	Glutamate receptor, ionotropic kainate 3
Smp_104580	311.917	3.12252	0.365375	8.54606	1.27364e-17	3.89626e-16	ribulose phosphate epimerase
Smp_180960	47.7362	-4.66635	0.546743	-8.53481	1.40384e-17	4.28058e-16	anion exchange protein 3
Smp_123190	177.174	-3.83899	0.449975	-8.53156	1.44387e-17	4.38832e-16	ADP ribosylation factor protein 2 binding
Smp_065290	839.467	-4.41575	0.51984	-8.49445	1.98877e-17	6.02487e-16	calcium:calmodulin dependent protein kinase I
Smp_017420	93.2627	-4.08688	0.481657	-8.48504	2.15636e-17	6.51152e-16	voltage gated hydrogen channel 1
Smp_098710	274.757	-2.28056	0.269059	-8.47605	2.32959e-17	7.01199e-16	quiescin q6 sulfhydryl oxidase
Smp_133540	105.003	1.88789	0.222761	8.47495	2.35188e-17	7.0564e-16	asparagine synthetase domain containing protein
Smp_162340	29.4255	7.37045	0.871117	8.46092	2.65267e-17	7.93344e-16	serine:threonine protein kinase ATR
Smp_169970	100.563	6.10311	0.723271	8.43821	3.22237e-17	9.60656e-16	kinetochore protein ndc80
Smp_170280	208.973	3.93092	0.466195	8.43192	3.40053e-17	1.01055e-15	integrin alpha ps
Smp_000170	40.2343	-5.59503	0.66505	-8.41295	3.99832e-17	1.18444e-15	kv channel interacting protein 2 (KChIP2)
Smp_123910	49.8979	-3.67308	0.436669	-8.4116	4.04467e-17	1.19439e-15	intraflagellar transport protein 20
Smp_146470	58.4605	-6.07261	0.723794	-8.38997	4.86255e-17	1.43139e-15	hypothetical protein
Smp_199580	26.9304	6.97641	0.832185	8.38324	5.14895e-17	1.49747e-15	hypothetical protein
Smp_068710	47.948	4.20191	0.50123	8.3832	5.151e-17	1.49747e-15	hypothetical protein
Smp_142190	509.994	-3.83145	0.457	-8.38391	5.11994e-17	1.49747e-15	#N/A
Smp_052990	138.844	-5.01535	0.598188	-8.38424	5.1056e-17	1.49747e-15	globin X
Smp_139050	87.7535	-6.20156	0.740911	-8.37018	5.75321e-17	1.66736e-15	GTP binding protein GEM
Smp_132390	215.625	-3.55154	0.424435	-8.36769	5.87598e-17	1.69769e-15	hypothetical protein
Smp_104730	249.911	-3.51223	0.420446	-8.35359	6.622e-17	1.90734e-15	DnaJ (Hsp40), subfamily B, member
Smp_055630	54.0316	-4.31013	0.516404	-8.34644	7.03523e-17	2.02015e-15	Serine rich adhesin for platelets
Smp_094710	139.295	-5.14479	0.617511	-8.33151	7.98207e-17	2.28502e-15	alstrom syndrome protein
Smp_013080	81.7031	-4.16096	0.499506	-8.33015	8.07431e-17	2.30438e-15	IQ and AAA domain containing protein 1
Smp_077180	72.3547	5.64425	0.677745	8.32799	8.22297e-17	2.33967e-15	serine:threonine protein kinase Chk1
Smp_043670	950.434	-3.17511	0.381638	-8.3197	8.81883e-17	2.50161e-15	ATP-dependent 6-phosphofructokinase
Smp_024520	736.615	-2.47158	0.297212	-8.31587	9.10796e-17	2.57582e-15	rab GDP dissociation inhibitor beta
Smp_134660	153.232	-3.14711	0.378517	-8.3143	9.22934e-17	2.60228e-15	radial spoke head protein 4 A
Smp_167160	112.072	-4.60518	0.555035	-8.29709	1.06695e-16	2.9993e-15	dynamin binding protein
Smp_126910	387.894	2.57766	0.311116	8.28521	1.17905e-16	3.30451e-15	periodic tryptophan protein 2
Smp_178260	87.0994	4.69783	0.567192	8.28261	1.20502e-16	3.36723e-15	DNA polymerase alpha catalytic subunit
Smp_172360	45.5608	-4.05488	0.48964	-8.28137	1.21771e-16	3.39255e-15	hypothetical protein
Smp_151000	102.959	-3.74964	0.453263	-8.27256	1.31116e-16	3.64208e-15	cationic amino acid transporter
Smp_125730	147.994	-4.67501	0.565378	-8.26883	1.35281e-16	3.74665e-15	hypothetical protein
Smp_156790	65.8802	-4.40291	0.53317	-8.25799	1.48146e-16	4.09084e-15	hypothetical protein
Smp_003990	1251.81	-2.05571	0.249379	-8.24333	1.67488e-16	4.61133e-15	triosephosphate isomerase 1a
Smp_163160	155.586	-5.826	0.707792	-8.23123	1.85295e-16	5.08665e-15	short transient receptor potential channel 6
Smp_212300	49.9843	5.78768	0.703887	8.22246	1.99365e-16	5.45689e-15	Rho GTPase activator (Rgd1)
Smp_057090	54.9833	-3.95399	0.481245	-8.21616	2.10115e-16	5.73438e-15	radial spoke head protein 4 A
Smp_160070	126.116	-5.33478	0.649392	-8.21504	2.121e-16	5.77171e-15	RING finger protein
Smp_162260	1028.6	-3.23966	0.394611	-8.20976	2.2164e-16	6.01383e-15	phosphatidylinositol binding clathrin assembly
Smp_192110	362.894	-4.76305	0.580433	-8.20604	2.28605e-16	6.1849e-15	Tubulin beta 2C chain
Smp_138100	62.9204	-4.78533	0.583223	-8.20498	2.30631e-16	6.22172e-15	hypothetical protein
Smp_156510	49.876	-6.33514	0.772203	-8.20399	2.32537e-16	6.25512e-15	PDZ and LIM domain protein 7
Smp_133210	62.4572	-4.17953	0.510448	-8.18797	2.65677e-16	7.12607e-15	lysosomal alpha glucosidase
Smp_137430	673.649	1.35753	0.166127	8.17162	3.04276e-16	8.13807e-15	splicing factor 3b subunit 3
Smp_138600	584.94	-4.22311	0.516894	-8.17017	3.07952e-16	8.21293e-15	hypothetical protein
Smp_134350	29.4741	-6.00266	0.736315	-8.15229	3.57085e-16	9.49623e-15	thyrotropin releasing hormone receptor
Smp_043220	1274.54	-2.02832	0.249177	-8.14008	3.95012e-16	1.04751e-14	hypothetical protein
Smp_131980	42.8128	-5.66573	0.696321	-8.13667	4.06305e-16	1.07441e-14	hypothetical protein
Smp_128380	276.8	-3.87357	0.476537	-8.12858	4.3436e-16	1.14537e-14	glutamate synthase
Smp_022070	74.9098	-3.10572	0.382146	-8.12707	4.39788e-16	1.15642e-14	hypothetical protein
Smp_127930	221.744	-3.55452	0.437961	-8.11607	4.81525e-16	1.26262e-14	hypothetical protein
Smp_127020	40.2356	8.07402	0.995352	8.11172	4.99077e-16	1.30499e-14	ets variant gene 4
Smp_070100	855.499	-4.04888	0.499162	-8.11135	5.00598e-16	1.30532e-14	hypothetical protein
Smp_171780	120.263	-3.39128	0.418794	-8.09773	5.59946e-16	1.45601e-14	SPARC protein
Smp_135550	49.2888	-3.94051	0.487205	-8.08798	6.06613e-16	1.57299e-14	hypothetical protein
Smp_150500	814.5	-2.30159	0.284788	-8.08176	6.38409e-16	1.65087e-14	NMDA receptor glutamate binding chain
Smp_133070	80.5294	-4.82651	0.597624	-8.07616	6.68372e-16	1.72359e-14	hypothetical protein
Smp_099890	1616.5	-2.03671	0.252748	-8.05823	7.74054e-16	1.99064e-14	Receptor expression enhancing protein 5
Smp_097940	89.6628	-4.25416	0.527968	-8.05762	7.77969e-16	1.99522e-14	serine:threonine protein kinase Nek7
Smp_171270	68.9058	-4.8822	0.606191	-8.05389	8.0203e-16	2.05131e-14	Molybdenum cofactor biosynthesis protein 1
Smp_126420	55.4964	-5.48087	0.681236	-8.04548	8.59087e-16	2.19126e-14	hypothetical protein
Smp_054170	1008.05	-3.48967	0.433963	-8.0414	8.8819e-16	2.25933e-14	hypothetical protein
Smp_131050	160.141	-3.84269	0.47828	-8.03439	9.40467e-16	2.38583e-14	cAMP dependent protein kinase R2
Smp_033150	126.363	-2.43106	0.302606	-8.03377	9.45246e-16	2.39147e-14	hypothetical protein
Smp_176350	88.9432	-3.58667	0.446658	-8.03002	9.74606e-16	2.45911e-14	contactin
Smp_143090	41.3837	-3.47938	0.43368	-8.02291	1.03266e-15	2.59859e-14	hypothetical protein
Smp_147440	107.761	-3.67902	0.458617	-8.022	1.04041e-15	2.61106e-14	tektin a1
Smp_012380	44.6094	-4.56422	0.569142	-8.01948	1.06196e-15	2.65803e-14	voltage gated potassium channel subunit beta 2
Smp_092020	279.635	-4.80825	0.599931	-8.01466	1.10442e-15	2.75693e-14	cement protein 3B variant 2
Smp_044010	1621.22	-2.24334	0.280076	-8.00973	1.14961e-15	2.86209e-14	tropomyosin
Smp_055800	827.18	2.02402	0.252793	8.00664	1.17882e-15	2.92703e-14	pescadillo
Smp_174820	55.6741	4.41309	0.552039	7.99417	1.3045e-15	3.23053e-14	hypothetical protein
Smp_139340	1235.04	-1.99894	0.25011	-7.99223	1.32519e-15	3.27313e-14	hypothetical protein
Smp_013970	31.004	7.44789	0.931943	7.99178	1.33002e-15	3.2764e-14	#N/A
Smp_142820	102.996	5.45206	0.683097	7.98138	1.44705e-15	3.55533e-14	hypothetical protein
Smp_156080	75.9479	-4.07612	0.510817	-7.97962	1.46786e-15	3.59703e-14	dynein heavy chain
Smp_065060	291.713	1.82454	0.228755	7.97596	1.51199e-15	3.69549e-14	1 pyrroline 5 carboxylate dehydrogenase
Smp_123830	116.805	-4.59027	0.576292	-7.9652	1.64963e-15	4.0214e-14	collagen alpha (xi) chain
Smp_043650	786.392	-3.20932	0.402988	-7.96382	1.6681e-15	4.05586e-14	hypothetical protein
Smp_156530	362.813	-3.8821	0.487538	-7.96266	1.68379e-15	4.0834e-14	peptidylglycine alpha amidating monooxygenase
Smp_040680	1133.13	-3.69267	0.464238	-7.95426	1.80207e-15	4.35896e-14	dynein light chain
Smp_201130	114.545	-4.05049	0.509277	-7.9534	1.8146e-15	4.37796e-14	hypothetical protein
Smp_151190	221.751	-2.53136	0.318339	-7.95176	1.83874e-15	4.4248e-14	retinal rod rhodopsin sensitive cGMP
Smp_147430	104.849	-5.05105	0.63524	-7.9514	1.84422e-15	4.4266e-14	Glutamate receptor, ionotropic kainate 2
Smp_204310	90.3022	-3.69584	0.465497	-7.93956	2.02894e-15	4.85752e-14	hypothetical protein
Smp_050830	348.351	-1.9035	0.240292	-7.92162	2.34438e-15	5.59839e-14	phosphatidylinositol 4,5 bisphosphate
Smp_147800	83.3992	-5.73791	0.724972	-7.91467	2.47918e-15	5.90525e-14	Lmp3 protein
Smp_054160	15957.8	3.11688	0.393896	7.91294	2.51373e-15	5.97234e-14	glutathione S-transferase class-mu 28 kDa isozyme
Smp_063070	143.786	-4.61617	0.583592	-7.90993	2.57529e-15	6.1031e-14	ras protein Rab 10
Smp_104520	955.437	-1.84639	0.233797	-7.89738	2.8482e-15	6.73283e-14	vacuolar protein sorting 45
Smp_179780	65.92	-6.06089	0.767612	-7.89578	2.88508e-15	6.80282e-14	Sox3
Smp_198960	579.113	-3.45717	0.438156	-7.89026	3.01561e-15	7.09275e-14	hypothetical protein
Smp_098850	149.313	3.55382	0.450465	7.88924	3.04036e-15	7.12021e-14	interferon stimulated 20 kDa exonuclease
Smp_048690	150.58	-3.50434	0.444197	-7.88915	3.0425e-15	7.12021e-14	enkurin
Smp_172340	24.489	6.97596	0.884834	7.88392	3.1726e-15	7.40617e-14	hypothetical protein
Smp_060180	424.294	1.38259	0.175712	7.86852	3.58873e-15	8.35675e-14	nucleoporin seh1 (sec13 protein)
Smp_124070	59.8388	-4.6908	0.596835	-7.85946	3.85797e-15	8.96141e-14	venom allergen (val) protein
Smp_171140	137.812	-4.05291	0.516085	-7.85318	4.05609e-15	9.39828e-14	serine rich repeat protein
Smp_106060	258.385	-2.1805	0.277724	-7.85133	4.11651e-15	9.49129e-14	calcium binding mitochondrial carrier protein
Smp_192610	49.0592	-5.31491	0.67693	-7.8515	4.11085e-15	9.49129e-14	hypothetical protein
Smp_204880	61.2813	-4.12927	0.526633	-7.84087	4.47421e-15	1.02907e-13	hypothetical protein
Smp_192780	857.857	-4.85305	0.619039	-7.83965	4.51791e-15	1.03657e-13	hypothetical protein
Smp_093110	102.317	-3.60078	0.459885	-7.82974	4.88878e-15	1.11892e-13	hypothetical protein
Smp_158180	63.2312	-4.9645	0.634316	-7.82654	5.01496e-15	1.145e-13	hypothetical protein
Smp_034870	1141.09	-1.55717	0.198994	-7.82522	5.06774e-15	1.15424e-13	AP 1 complex subunit beta 1
Smp_213900	78.09	-3.89358	0.498341	-7.81308	5.58091e-15	1.26803e-13	type IV collagen alpha 1 chain
Smp_155390	94.3916	6.20305	0.794634	7.80618	5.89475e-15	1.3361e-13	hypothetical protein
Smp_168460	112.679	-3.49528	0.447842	-7.80471	5.96366e-15	1.34845e-13	hypothetical protein
Smp_137170	239.023	-4.23411	0.543133	-7.7957	6.4052e-15	1.4448e-13	plasma membrane calcium transporting ATPase
Smp_136540	160.433	-3.77221	0.484467	-7.78631	6.89958e-15	1.55257e-13	DNAJ
Smp_132510	35.6089	5.90757	0.759121	7.78213	7.13139e-15	1.60089e-13	breast cancer type 1 susceptibility protein
Smp_126350	731.707	-3.88994	0.499967	-7.78039	7.23017e-15	1.61918e-13	NMDA type glutamate receptor 1
Smp_047460	102.471	-5.06042	0.650607	-7.778	7.36829e-15	1.64617e-13	astacin protein
Smp_079420	314.554	-2.77882	0.357368	-7.7758	7.497e-15	1.67094e-13	ankyrin repeat domain containing protein 42
Smp_150410	64.8264	-4.79854	0.617776	-7.76743	8.00917e-15	1.78085e-13	coiled coil domain containing protein C16orf93
Smp_159220	39.9206	-3.96465	0.510668	-7.76366	8.25137e-15	1.83036e-13	hypothetical protein
Smp_168400	153.788	2.678	0.34532	7.75512	8.82624e-15	1.95325e-13	mis12
Smp_138510	60.1702	-4.59585	0.592753	-7.75339	8.94695e-15	1.97529e-13	hypothetical protein
Smp_149580	29.6966	-6.03463	0.778968	-7.74695	9.4123e-15	2.07314e-13	fmrfamide receptor
Smp_149270	85.6098	-5.36179	0.692206	-7.74595	9.48681e-15	2.08465e-13	hypothetical protein
Smp_140200	393.472	-2.39606	0.309356	-7.74531	9.53487e-15	2.0903e-13	flowering locus c variant
Smp_196810	262.897	-4.50832	0.582332	-7.74184	9.79867e-15	2.14312e-13	dihydropyrimidinase related protein 3
Smp_150550	103.863	-5.77278	0.745889	-7.73946	9.98413e-15	2.17859e-13	titin
Smp_066760	1300.09	2.58967	0.335013	7.73005	1.07505e-14	2.33493e-13	merlin:moesin:ezrin:radixin
Smp_084010	790.735	-4.87977	0.631248	-7.73034	1.07259e-14	2.33493e-13	hypothetical protein
Smp_144110	42.2437	-6.06445	0.784963	-7.72578	1.11172e-14	2.40899e-13	FMRFamide activated amiloride sensitive sodium
Smp_007070	70.6082	-4.77469	0.618278	-7.72255	1.14022e-14	2.46504e-13	neuropeptide Y receptor invertebrate
Smp_190140	89.7919	-4.16027	0.538804	-7.72129	1.15154e-14	2.48377e-13	radial spoke head 1
Smp_177120	119.111	2.44256	0.316485	7.71777	1.18384e-14	2.54756e-13	cell division cycle 7 protein
Smp_123350	97.2042	-5.33754	0.691753	-7.71597	1.20067e-14	2.57785e-13	galanin receptor type 2
Smp_151320	73.2396	3.79029	0.491873	7.70583	1.29995e-14	2.78462e-13	targeting protein for Xklp2
Smp_171370	188.617	4.59981	0.597573	7.6975	1.38758e-14	2.96556e-13	serine:threonine protein kinase Chk2
Smp_150520	79.1474	-5.32451	0.691881	-7.6957	1.40724e-14	3.00072e-13	high affinity choline transporter 1
Smp_133760	39.0696	-5.58323	0.726036	-7.69001	1.47119e-14	3.12996e-13	hypothetical protein
Smp_171520	797.649	-2.19192	0.285684	-7.67253	1.68632e-14	3.57951e-13	hypothetical protein
Smp_126480	114.521	-4.60603	0.601024	-7.66364	1.8073e-14	3.82763e-13	calponin
Smp_162370	56.6408	5.75538	0.751114	7.66246	1.82403e-14	3.85435e-13	histone H1 gamma, late
Smp_033040	291.983	-2.71304	0.354613	-7.65071	1.99872e-14	4.21397e-13	L lactate dehydrogenase
Smp_050220	463.554	-4.85174	0.634475	-7.64686	2.05946e-14	4.32877e-13	complexin
Smp_202470	52.5682	-5.46179	0.71427	-7.64668	2.06242e-14	4.32877e-13	dopamine receptor D1AlphaHom
Smp_072740	378.524	1.7937	0.234669	7.64354	2.11333e-14	4.42571e-13	phytochelatin synthase
Smp_049150	825.539	1.49061	0.195026	7.64313	2.12009e-14	4.42995e-13	glutamine oxaloacetic transaminase
Smp_131990	354.623	2.95431	0.386686	7.64006	2.17113e-14	4.51644e-13	Growth arrest specific protein 2 3
Smp_071050	1567.83	-4.25347	0.556716	-7.64029	2.16737e-14	4.51644e-13	hypothetical protein
Smp_146730	128.976	3.13323	0.410457	7.63352	2.28433e-14	4.74137e-13	a disintegrin and metalloproteinase with
Smp_121600	136.992	-4.07564	0.534259	-7.62859	2.3734e-14	4.91536e-13	hypothetical protein
Smp_057590	623.379	2.20137	0.289154	7.61311	2.67571e-14	5.52921e-13	hypothetical protein
Smp_204600	39.9137	3.85042	0.506058	7.60865	2.76976e-14	5.71096e-13	invadolysin (M08 family)
Smp_163570	75.9547	-3.42883	0.451022	-7.60235	2.90807e-14	5.98296e-13	Ryanodine receptor
Smp_087690	30.7352	-5.73164	0.753989	-7.60175	2.92145e-14	5.9973e-13	hypothetical protein
Smp_147420	128.199	-3.13645	0.412713	-7.5996	2.97038e-14	6.0844e-13	pro neuregulin membrane bound
Smp_167660	343.957	-2.85614	0.37705	-7.57496	3.59228e-14	7.34222e-13	Protein phosphatase 1 regulatory subunit 3B
Smp_159740	303.028	-4.76775	0.629927	-7.56872	3.76907e-14	7.68677e-13	solute carrier family 33
Smp_041540	39.5311	3.89144	0.514178	7.56827	3.78226e-14	7.69689e-13	Hormone receptor 4 (dHR4)
Smp_201210	253.943	-4.57579	0.604852	-7.56515	3.87428e-14	7.86705e-13	hypothetical protein
Smp_156230	160.428	-3.02219	0.399548	-7.56403	3.9076e-14	7.91755e-13	hypothetical protein
Smp_018690	71.8832	-4.43952	0.587197	-7.56053	4.01421e-14	8.11598e-13	neuropeptide f receptor 76f
Smp_161510	68.0517	-6.53959	0.865694	-7.55416	4.2158e-14	8.50519e-13	hypothetical protein
Smp_088260	162.986	5.00516	0.662938	7.54997	4.35358e-14	8.74546e-13	cell wall protein awa1p
Smp_168220	44.1147	2.84542	0.376872	7.55009	4.34966e-14	8.74546e-13	protein regulator of cytokinesis 1
Smp_157670	96.4048	-4.34562	0.576003	-7.54445	4.54201e-14	9.10444e-13	hypothetical protein
Smp_166800	91.9642	2.83483	0.376004	7.53937	4.72253e-14	9.44607e-13	hypothetical protein
Smp_067520	307.038	2.68531	0.356674	7.52874	5.12306e-14	1.02254e-12	jun protein
Smp_099210	86.2501	-4.80225	0.638241	-7.5242	5.30454e-14	1.05651e-12	hypothetical protein
Smp_212370	65.4473	-3.47568	0.462334	-7.51768	5.5756e-14	1.10814e-12	SNF4:AMP activated protein kinase gamma subunit
Smp_021920	260.068	-3.90838	0.51999	-7.51625	5.6371e-14	1.11799e-12	paramyosin
Smp_051810	1563.35	-1.91483	0.254949	-7.51063	5.88413e-14	1.16451e-12	elongation of very long chain fatty acids
Smp_060570	230.895	-2.35383	0.313474	-7.50884	5.96535e-14	1.17722e-12	hypothetical protein
Smp_158760	49.5498	-5.27874	0.70302	-7.50866	5.97349e-14	1.17722e-12	dynein beta chain, ciliary
Smp_143740	90.4178	2.84785	0.379519	7.50385	6.19681e-14	1.21866e-12	uroporphyrinogen decarboxylase
Smp_157180	21.3419	7.17156	0.956117	7.50072	6.3468e-14	1.24554e-12	hypothetical protein
Smp_120350	416.687	1.46728	0.195799	7.49379	6.69147e-14	1.30785e-12	WD repeat containing protein 46
Smp_128170	738.489	-2.64098	0.352423	-7.49377	6.69221e-14	1.30785e-12	hypothetical protein
Smp_125130	280.927	-4.06146	0.542277	-7.48965	6.90587e-14	1.34679e-12	transmembrane protein 145
Smp_134180	111.368	-4.12821	0.551671	-7.4831	7.25893e-14	1.4127e-12	receptor type tyrosine protein phosphatase
Smp_087580	606.331	-2.81785	0.376754	-7.47928	7.47326e-14	1.45139e-12	programmed cell death 6 interacting protein
Smp_095910	1643.29	-1.70348	0.227905	-7.4745	7.74997e-14	1.50202e-12	signal recognition particle receptor subunit
Smp_150640	378.499	-4.39218	0.587741	-7.47298	7.83976e-14	1.51628e-12	hypothetical protein
Smp_146050	66.0133	-4.97607	0.666073	-7.47076	7.97311e-14	1.53889e-12	hypothetical protein
Smp_175010	44.2334	-5.21292	0.697925	-7.46917	8.07042e-14	1.55447e-12	vesicular glutamate transporter
Smp_015630	424.674	-4.3662	0.584654	-7.46801	8.1415e-14	1.56494e-12	Glutamate-gated chloride channel subunit 2 isoform 1
Smp_103200	634.499	-1.17963	0.158116	-7.46055	8.61646e-14	1.65284e-12	V type proton ATPase subunit D
Smp_176010	45.3638	6.4703	0.868104	7.45337	9.0989e-14	1.74182e-12	cytoskeleton associated protein 5
Smp_143130	398.41	-4.4365	0.595425	-7.45098	9.26494e-14	1.76998e-12	four and A half lim domains
Smp_004590	139.711	-3.86342	0.518813	-7.44665	9.57408e-14	1.82531e-12	hypothetical protein
Smp_148990	899.905	1.5871	0.213175	7.44503	9.69218e-14	1.84408e-12	Nucleolar protein 5
Smp_132730	115.57	-5.0403	0.677876	-7.43543	1.04226e-13	1.97902e-12	G protein coupled receptor fragment
Smp_161380	129.552	2.42498	0.326933	7.41734	1.19493e-13	2.26431e-12	DNA polymerase gamma
Smp_181150	176.253	-3.53891	0.47723	-7.41552	1.21152e-13	2.29112e-12	ATP binding cassette sub family G
Smp_122410	95.3698	-4.14289	0.559058	-7.41048	1.25841e-13	2.375e-12	hypothetical protein
Smp_152990	229.205	-4.30295	0.581561	-7.39897	1.37243e-13	2.58498e-12	tetraspanin CD63 receptor
Smp_167040	78.4113	-3.59839	0.48637	-7.39846	1.37774e-13	2.58976e-12	Dynein intermediate chain
Smp_151500	106.89	-4.53777	0.614258	-7.3874	1.49732e-13	2.80889e-12	hypothetical protein
Smp_067580	369.617	-2.04314	0.276767	-7.38219	1.55711e-13	2.91522e-12	coiled coil domain containing protein 109A
Smp_038960	1408.88	-2.69538	0.365357	-7.37738	1.6144e-13	3.01645e-12	lactate dehydrogenase protein
Smp_187030	20.4653	6.22478	0.844546	7.37057	1.69901e-13	3.16822e-12	hypothetical protein
Smp_153530	91.9288	-3.857	0.523412	-7.36895	1.71972e-13	3.20047e-12	nucleoside diphosphate kinase 7
Smp_139810	1176.16	-4.29961	0.583722	-7.36585	1.76015e-13	3.2692e-12	coiled coil domain containing protein 39
Smp_136690	81.4603	-4.57704	0.62162	-7.36308	1.79717e-13	3.33135e-12	acetylcholinesterase
Smp_154730	96.0398	-3.73014	0.506728	-7.36124	1.82213e-13	3.37093e-12	rna binding protein musashi
Smp_149110	216.653	-3.94493	0.535969	-7.36037	1.83402e-13	3.38624e-12	hypothetical protein
Smp_142700	78.0546	-4.18882	0.569503	-7.35522	1.90611e-13	3.51243e-12	neuronal acetylcholine receptor subunit alpha 4
Smp_167000	115.586	-2.06881	0.28203	-7.33542	2.21032e-13	4.065e-12	centrosomal protein of 19 kDa
Smp_142080	317.558	-2.34504	0.319794	-7.33298	2.25088e-13	4.13147e-12	hypothetical protein
Smp_104360	37.5181	-3.06602	0.418314	-7.32947	2.31069e-13	4.23294e-12	hypothetical protein
Smp_092460	150.125	-4.33945	0.592142	-7.32839	2.3293e-13	4.25871e-12	Dihydropyrimidinase protein 3
Smp_058990	174.257	2.54836	0.347893	7.32514	2.38646e-13	4.33779e-12	meiotic nuclear division protein 1
Smp_105220	731.014	1.51356	0.206622	7.32529	2.38389e-13	4.33779e-12	hypothetical protein
Smp_094560	71.6403	-3.86821	0.528065	-7.32525	2.38448e-13	4.33779e-12	Kv4 class voltage gated potassium channel
Smp_146840	62.7407	-4.75313	0.648979	-7.324	2.40681e-13	4.36631e-12	netrin
Smp_026670	97.4761	-5.48812	0.749371	-7.32363	2.4135e-13	4.36997e-12	transmembrane protein 26
Smp_003930	100.739	-3.62148	0.494823	-7.31874	2.50306e-13	4.52338e-12	tetratricopeptide repeat protein 26
Smp_145140	104.328	-5.30558	0.725459	-7.31341	2.60442e-13	4.69749e-12	wnt5
Smp_152210	29.3358	-5.89013	0.806493	-7.30339	2.8061e-13	5.05151e-12	odd skipped
Smp_168760	144.464	2.25803	0.309205	7.3027	2.82043e-13	5.06757e-12	pyridine nucleotide disulfide oxidoreductase
Smp_041280	284.637	-4.65612	0.63861	-7.29102	3.07608e-13	5.51632e-12	CUGBP Elav family
Smp_137740	66.9763	-4.4359	0.609006	-7.28385	3.24434e-13	5.80694e-12	alpha(13)fucosyltransferase
Smp_133830	32.9492	-4.28606	0.588539	-7.28253	3.27606e-13	5.85252e-12	hypothetical protein
Smp_031190	49.936	-4.97601	0.683361	-7.28166	3.2973e-13	5.87924e-12	phospholipase A
Smp_154020	495.045	-3.33632	0.458556	-7.27571	3.44615e-13	6.13296e-12	ankyrin 2,3:unc44
Smp_167540	204.032	2.89387	0.397948	7.27198	3.54243e-13	6.29235e-12	dna replication factor cdt1
Smp_024860	168.385	4.17756	0.574501	7.27163	3.55175e-13	6.29696e-12	Basic helix loop helix transcription factor
Smp_154760	96.5105	-3.61398	0.497053	-7.27082	3.57307e-13	6.32277e-12	egf domain protein
Smp_135010	395.35	-2.00014	0.275175	-7.26863	3.6316e-13	6.41422e-12	oxalate:formate antiporter
Smp_017870	53.6091	-3.61626	0.497639	-7.26682	3.68036e-13	6.48811e-12	hypothetical protein
Smp_032720	61.0146	-3.24503	0.44664	-7.26542	3.71875e-13	6.54347e-12	hypothetical protein
Smp_050630	190.479	-2.33373	0.321465	-7.25967	3.88046e-13	6.8152e-12	extended synaptotagmin protein 2a
Smp_203590	84.7587	-3.64736	0.503433	-7.24497	4.32537e-13	7.58236e-12	hypothetical protein
Smp_175590	433.632	6.31688	0.872467	7.24026	4.47841e-13	7.83596e-12	proto oncogene tyrosine protein kinase receptor
Smp_139330	145.088	-4.53802	0.626902	-7.23879	4.52691e-13	7.90605e-12	nicotinic acetylcholine receptor non alpha
Smp_140150	55.7848	-3.19736	0.441837	-7.23652	4.60353e-13	8.02488e-12	katanin p60 ATPase containing subunit A
Smp_136480	197.053	-4.45311	0.615465	-7.23536	4.64292e-13	8.07852e-12	CCAAT box DNA binding protein subunit B
Smp_016600	198.154	-4.0742	0.563586	-7.22906	4.86334e-13	8.44632e-12	solute carrier family 1
Smp_196040	883.584	-1.35004	0.186831	-7.22598	4.97507e-13	8.62438e-12	SHC transforming protein 3
Smp_145540	190.261	-5.43188	0.753997	-7.20412	5.84211e-13	1.01087e-11	muscarinic acetylcholine receptor
Smp_104890	49.3819	-4.60608	0.640433	-7.19214	6.37837e-13	1.10162e-11	Glutamate-gated chloride channel subunit 3
Smp_153210	33.7209	-4.74717	0.660131	-7.19125	6.42009e-13	1.10679e-11	rhodopsin orphan GPCR
Smp_082250	82.4816	-3.35713	0.467002	-7.18869	6.5418e-13	1.12569e-11	cytosolic carboxypeptidase 6
Smp_174320	71.3484	-4.75349	0.661482	-7.18613	6.66537e-13	1.14485e-11	Protein lozenge
Smp_147450	115.061	-3.77259	0.525052	-7.18516	6.71268e-13	1.15087e-11	cAMP dependent protein kinase catalytic subunit
Smp_018980	47.6493	-6.56167	0.913862	-7.18015	6.96342e-13	1.19167e-11	hypothetical protein
Smp_158770	151.842	-2.7484	0.383033	-7.17537	7.21135e-13	1.23185e-11	calcyphosin 2
Smp_093820	1403.45	1.83981	0.256646	7.16866	7.57381e-13	1.29141e-11	glutamate dehydrogenase
Smp_212260	1657.38	1.74415	0.243312	7.16838	7.58909e-13	1.29166e-11	histone binding protein Caf1
Smp_126940	31.5852	-5.96372	0.832642	-7.16241	7.92721e-13	1.34676e-11	hypothetical protein
Smp_192400	59.7739	-3.49722	0.488802	-7.15467	8.38719e-13	1.42233e-11	hypothetical protein
Smp_042810	84.9361	3.99792	0.559202	7.14933	8.72036e-13	1.47615e-11	chromosome transmission fidelity protein 18
Smp_145800	304.091	1.48241	0.207842	7.13238	9.86467e-13	1.66684e-11	ribosome production factor 1
Smp_166920	44.5071	-5.81423	0.815307	-7.13133	9.94008e-13	1.67656e-11	PDZ and LIM domain protein Zasp
Smp_050820	363.907	2.87509	0.403433	7.12658	1.02893e-12	1.73234e-11	Replication factor C 38 kDa subunit
Smp_029780	61.1173	-3.43487	0.482188	-7.12352	1.05205e-12	1.76809e-11	hypothetical protein
Smp_034550	208.484	-3.98386	0.559339	-7.12245	1.06026e-12	1.7787e-11	alpha actinin
Smp_106970	144.072	-4.35794	0.611993	-7.12089	1.07231e-12	1.79568e-11	family S9 non peptidase ue (S09 family)
Smp_041700	112.756	-3.52506	0.495341	-7.11644	1.1075e-12	1.8513e-11	G protein coupled receptor fragment
Smp_051080	758.153	1.54886	0.217728	7.11373	1.12944e-12	1.88462e-11	clathrin light chain
Smp_124980	54.0726	-3.81906	0.53697	-7.11226	1.14162e-12	1.90154e-11	Tumor necrosis factor, alpha induced protein
Smp_146640	92.4755	-5.40012	0.759854	-7.10679	1.18776e-12	1.97489e-11	like glycosyltransferase
Smp_197730	339.844	4.39412	0.618956	7.09924	1.25446e-12	2.08209e-11	rrm containing protein seb 4
Smp_159780	103.548	-4.36278	0.614579	-7.09882	1.25827e-12	2.08473e-11	hypothetical protein
Smp_143840	1992.3	-2.64433	0.372532	-7.09826	1.26334e-12	2.08943e-11	glycogen phosphorylase
Smp_205920	36.6112	-5.16259	0.727508	-7.09626	1.28176e-12	2.11614e-11	protocadherin 1
Smp_070090	178.327	-2.28832	0.32271	-7.09094	1.33206e-12	2.19532e-11	hematopoietic lineage cell specific protein
Smp_103920	229.071	-3.11746	0.439939	-7.08612	1.37928e-12	2.26915e-11	Dynein intermediate chain
Smp_045990	40.3467	-4.37573	0.61771	-7.0838	1.40256e-12	2.30339e-11	GTP binding protein Di Ras2
Smp_150230	141.281	-3.97129	0.560872	-7.08056	1.43574e-12	2.35376e-11	metal tolerance protein C3
Smp_132410	42.42	-5.12777	0.72424	-7.08021	1.43939e-12	2.35562e-11	neuropeptide receptor
Smp_106010	547.986	-2.86095	0.404215	-7.0778	1.46456e-12	2.39263e-11	hypothetical protein
Smp_028050	56.0965	5.25925	0.746001	7.04992	1.79019e-12	2.91951e-11	hypothetical protein
Smp_200560	41.3084	3.96963	0.563144	7.04905	1.80138e-12	2.93264e-11	hypothetical protein
Smp_017520	237.892	-4.11382	0.584349	-7.04	1.92243e-12	3.12428e-11	inositol polyphosphate 1 phosphatase
Smp_153070	65.2177	-5.24616	0.745356	-7.03847	1.94366e-12	3.15332e-11	hypothetical protein
Smp_092500	101.567	-2.8812	0.409901	-7.02901	2.08003e-12	3.36872e-11	thioredoxin domain containing protein 17
Smp_164760	203.8	-3.09778	0.440903	-7.02599	2.12554e-12	3.43648e-11	cell adhesion molecule
Smp_159990	211.955	-4.04648	0.576157	-7.02322	2.16809e-12	3.49922e-11	Voltage gated calcium channel, L type, alpha
Smp_075770	96.5237	-4.87642	0.69466	-7.01986	2.22084e-12	3.57819e-11	hypothetical protein
Smp_103810	1218.35	1.94304	0.276937	7.01618	2.28014e-12	3.66741e-11	hypothetical protein
Smp_019210	24.0317	-4.35816	0.621869	-7.00817	2.41464e-12	3.87709e-11	hypothetical protein
Smp_212560	75.4253	-3.97479	0.567831	-6.99995	2.56056e-12	4.10435e-11	cytochrome b5 domain containing protein 1
Smp_037590	928.66	2.4887	0.355555	6.99949	2.56892e-12	4.11071e-11	dna replication licensing factor mcm3
Smp_047700	213.563	-3.16924	0.45294	-6.99704	2.61422e-12	4.17606e-11	ring h2 finger protein atl5
Smp_136850	58.3292	-3.12195	0.446821	-6.98703	2.80776e-12	4.47758e-11	Centrin 1
Smp_144130	58.6614	-5.54692	0.79597	-6.96876	3.19741e-12	5.09031e-11	hypothetical protein
Smp_064950	995.751	-1.95298	0.280274	-6.9681	3.21243e-12	5.10553e-11	calcineurin b
Smp_158360	19.3538	5.68774	0.816513	6.96589	3.26337e-12	5.16893e-11	hypothetical protein
Smp_156480	64.6564	-4.49546	0.645336	-6.96608	3.25894e-12	5.16893e-11	hypothetical protein
Smp_082420	88.8159	-4.89613	0.703411	-6.96056	3.38927e-12	5.35929e-11	uridine phosphorylase
Smp_045550	87.9614	-4.61422	0.662993	-6.95968	3.41043e-12	5.38366e-11	annexin
Smp_132870	937.013	-0.899082	0.129201	-6.95878	3.43221e-12	5.40192e-11	DNAj subfamily B member
Smp_161680	421.504	-2.21997	0.319019	-6.95873	3.43355e-12	5.40192e-11	phosphorylase B kinase beta, kpbb
Smp_035210	131.459	-4.86279	0.698869	-6.95808	3.44934e-12	5.41766e-11	multivalent antigen sj97 GAPDH
Smp_139620	439.801	4.3217	0.62125	6.95645	3.48942e-12	5.47143e-11	hypothetical protein
Smp_131250	423.745	-2.17762	0.313171	-6.95346	3.56426e-12	5.57944e-11	hypothetical protein
Smp_125040	340.376	3.37953	0.486151	6.9516	3.61156e-12	5.64405e-11	Epa2p protein
Smp_208030	151.503	-2.79024	0.40142	-6.95092	3.62902e-12	5.66187e-11	hypothetical protein
Smp_037780	394.573	-1.85182	0.266542	-6.94757	3.7162e-12	5.78824e-11	hypothetical protein
Smp_158810	648.175	1.71232	0.246907	6.93509	4.05976e-12	6.31286e-11	hypothetical protein
Smp_121460	200.451	1.92191	0.277672	6.92151	4.46849e-12	6.92541e-11	hypothetical protein
Smp_154010	170.154	-3.23886	0.46793	-6.92168	4.46331e-12	6.92541e-11	Halobacterial transducer protein VI
Smp_175900	477.992	-3.99243	0.57705	-6.91869	4.55829e-12	7.05291e-11	synaptotagmin
Smp_030440	150.235	-3.41335	0.493431	-6.91759	4.59389e-12	7.09627e-11	hypothetical protein
Smp_151090	110.396	-3.82418	0.552869	-6.91697	4.61391e-12	7.10376e-11	cationic amino acid transporter
Smp_164730	182.294	-3.96559	0.573307	-6.91705	4.61153e-12	7.10376e-11	rhodopsin orphan GPCR
Smp_155050	129.896	-3.5068	0.507977	-6.90346	5.07494e-12	7.80075e-11	agrin
Smp_173450	84.9356	5.39949	0.782599	6.89943	5.22103e-12	8.01215e-11	chromosome associated kinesin KIF4A
Smp_000100	179.418	-3.11607	0.451882	-6.89575	5.35795e-12	8.2088e-11	Actin-binding/filamin-like protein
Smp_121800	664.227	1.69766	0.246348	6.89133	5.52712e-12	8.45415e-11	replication protein A 70 kDa DNA binding
Smp_203950	159.845	-3.52922	0.512317	-6.88875	5.62833e-12	8.59492e-11	retinol dehydrogenase 11
Smp_031770	17.4073	-4.52538	0.657235	-6.88547	5.75967e-12	8.78115e-11	Tropomyosin II isoform 16
Smp_157640	85.2432	-5.43623	0.791014	-6.87248	6.30974e-12	9.60415e-11	fmrfamide receptor
Smp_102960	310.898	-1.84306	0.268194	-6.87213	6.325e-12	9.61174e-11	hypothetical protein
Smp_054840	588.203	2.51671	0.366584	6.86529	6.63552e-12	1.00673e-10	DNA replication licensing factor MCM2
Smp_193360	26.5423	4.85867	0.707919	6.86331	6.72849e-12	1.01918e-10	Fanconi anemia group I protein
Smp_019350	361.66	-3.99361	0.582234	-6.85911	6.92895e-12	1.04785e-10	hypothetical protein
Smp_083710	75.9078	3.33285	0.486041	6.85715	7.025e-12	1.06066e-10	Fanconi anemia, complementation group M
Smp_159790	127.926	-4.31618	0.62992	-6.85195	7.28499e-12	1.09728e-10	kinesin family A
Smp_125930	43.8393	-4.89734	0.714748	-6.85183	7.29097e-12	1.09728e-10	centrosomal protein of 72 kDa
Smp_147190	41.9244	-4.49347	0.656416	-6.84546	7.62329e-12	1.14545e-10	hypothetical protein
Smp_170070	22.0962	-3.96483	0.579431	-6.84262	7.77565e-12	1.16647e-10	innexin
Smp_126310	216.127	-3.10117	0.453676	-6.83566	8.16277e-12	1.22259e-10	beta 1 syntrophin
Smp_069240	87.3603	-5.54362	0.812109	-6.8262	8.7191e-12	1.30383e-10	potassium voltage gated channel protein Shaker
Smp_000660	510.082	-2.29486	0.336274	-6.82438	8.8306e-12	1.31839e-10	ornithine aminotransferase
Smp_076030	161.86	-3.91253	0.574256	-6.81323	9.54333e-12	1.42253e-10	tob protein
Smp_140770	81.9702	-4.3153	0.633563	-6.81116	9.68134e-12	1.44081e-10	protein phosphatase 7
Smp_161920	5569.8	-2.79681	0.410814	-6.80798	9.89756e-12	1.47065e-10	actin
Smp_172830	25.9961	-3.55327	0.522333	-6.8027	1.0268e-11	1.52327e-10	Dyp type peroxidase
Smp_144160	23.5335	6.37772	0.937824	6.80055	1.04221e-11	1.5437e-10	hypothetical protein
Smp_150920	92.9156	-3.77299	0.554987	-6.79835	1.05827e-11	1.56501e-10	synaptotagmin
Smp_141700	36.1624	3.86203	0.568863	6.78904	1.12886e-11	1.66676e-10	#N/A
Smp_038080	799.772	1.38917	0.20468	6.78702	1.1447e-11	1.68749e-10	importin subunit beta 1
Smp_118570	307.416	2.39948	0.353656	6.78477	1.16273e-11	1.71137e-10	hypothetical protein
Smp_158990	70.9768	-4.3009	0.63396	-6.78417	1.16752e-11	1.71572e-10	neuronal calcium sensor
Smp_168140	45.9264	-3.49157	0.514832	-6.78197	1.18552e-11	1.73944e-10	hypothetical protein
Smp_176720	29.372	-3.94832	0.582388	-6.77953	1.20566e-11	1.76622e-10	lipoma HMGIC fusion partner 3 protein like
Smp_154940	31.8898	4.14843	0.612027	6.77818	1.217e-11	1.78005e-10	hypothetical protein
Smp_178740	400.744	2.53874	0.374812	6.77337	1.25815e-11	1.83737e-10	protein lin 54
Smp_042120	226.45	-4.41468	0.652245	-6.76843	1.30185e-11	1.89823e-10	hypothetical protein
Smp_119050	18.8321	-5.75602	0.850472	-6.76803	1.30549e-11	1.90058e-10	collagen alpha chain
Smp_170990	447.533	2.74287	0.406407	6.74907	1.48794e-11	2.16283e-10	vinculin
Smp_145460	188.62	-2.81424	0.417272	-6.74439	1.53674e-11	2.2303e-10	hypothetical protein
Smp_148740	74.6302	-4.57649	0.67886	-6.74142	1.56841e-11	2.27273e-10	hypothetical protein
Smp_076630	518.214	1.87552	0.278441	6.73577	1.63062e-11	2.35924e-10	nonsense mediated mrna decay protein
Smp_119140	80.2927	2.58372	0.383603	6.7354	1.63482e-11	2.36166e-10	hypothetical protein
Smp_065210	69.5054	-4.29253	0.63736	-6.73485	1.64098e-11	2.3669e-10	hypothetical protein
Smp_084090	34.398	-4.99962	0.742664	-6.73201	1.6734e-11	2.40996e-10	hypothetical protein
Smp_076010	105.282	-2.17576	0.323501	-6.72567	1.74785e-11	2.51331e-10	hypothetical protein
Smp_160280	83.6639	-4.16179	0.61913	-6.72199	1.79261e-11	2.57371e-10	tectonic 1
Smp_046000	83.4842	-4.2531	0.633172	-6.71713	1.85336e-11	2.65686e-10	#N/A
Smp_144280	105.433	-3.71001	0.552623	-6.71345	1.90079e-11	2.72069e-10	tensin
Smp_213910	49.9257	-4.33051	0.645398	-6.70982	1.94861e-11	2.78488e-10	type IV collagen alpha 1 chain
Smp_137750	291.541	-3.71369	0.553687	-6.7072	1.98398e-11	2.8311e-10	calbindin 32
Smp_193670	19.9771	-5.38716	0.803227	-6.7069	1.98808e-11	2.83264e-10	carbonic anhydrase XIII
Smp_003440	118.106	-4.61114	0.687818	-6.70401	2.02782e-11	2.88486e-10	stomatin
Smp_202690	421.158	-1.53895	0.229571	-6.70358	2.03377e-11	2.88894e-10	universal stress protein
Smp_133580	101.894	-5.11794	0.764177	-6.69732	2.12276e-11	3.01078e-10	hypothetical protein
Smp_012350	236.71	-1.5844	0.23719	-6.67988	2.39146e-11	3.38676e-10	venom allergen-like (VAL) 11 protein
Smp_135170	307.791	-1.5692	0.235264	-6.66994	2.55913e-11	3.61874e-10	hypothetical protein
Smp_101820	263.732	2.36592	0.354737	6.66951	2.5665e-11	3.62368e-10	lupus la ribonucleoprotein
Smp_075130	770.171	-2.6419	0.396256	-6.66716	2.60793e-11	3.67663e-10	guanine nucleotide binding protein subunit
Smp_130090	72.0788	-3.19745	0.479632	-6.66647	2.62028e-11	3.68849e-10	deoxyribonuclease 1 2 like
Smp_035500	67.176	-3.19067	0.479051	-6.6604	2.7308e-11	3.83829e-10	parkin co regulated gene protein
Smp_011680	1997.56	2.14282	0.321883	6.65715	2.79194e-11	3.91835e-10	CD36 class B scavenger receptor
Smp_210860	147.076	-2.88993	0.434446	-6.65199	2.89155e-11	4.05207e-10	dystrobrevin
Smp_129060	629.363	-3.94679	0.593504	-6.64998	2.93126e-11	4.10157e-10	solute carrier family 17
Smp_170800	856.287	1.39013	0.20915	6.64659	2.99959e-11	4.19092e-10	cysteinyl tRNA synthetase, cytoplasmic
Smp_089780	71.6392	-6.16127	0.927281	-6.64445	3.04361e-11	4.24608e-10	p2X purinoceptor 4
Smp_176940	972.545	-2.67567	0.402713	-6.64411	3.05046e-11	4.24931e-10	cationic amino acid transporter
Smp_200750	20.1015	-5.42092	0.816039	-6.64296	3.07448e-11	4.2764e-10	hypothetical protein
Smp_000190	313.798	2.24571	0.338252	6.63916	3.15474e-11	4.38153e-10	short chain dehydrogenase:reductase family 16C
Smp_141660	71.1973	-3.44286	0.518644	-6.6382	3.17538e-11	4.40367e-10	high voltage-activated calcium channel beta subunit 2
Smp_130920	94.9115	-4.4318	0.667942	-6.63501	3.24481e-11	4.4933e-10	multiple C2 and transmembrane domain containing protein
Smp_199070	438.182	1.96914	0.297104	6.62776	3.40827e-11	4.71267e-10	DNA mismatch repair protein MSH2
Smp_159090	43.5931	-2.60888	0.394103	-6.6198	3.59689e-11	4.96614e-10	hypothetical protein
Smp_195180	767.289	4.59836	0.694949	6.61683	3.66987e-11	5.05201e-10	antigenic integral membrane glycoprotein
Smp_040990	52.8583	2.76646	0.418094	6.61685	3.66944e-11	5.05201e-10	Ribonuclease H2 subunit C
Smp_074000	3428.99	-2.20626	0.333449	-6.61649	3.67828e-11	5.05614e-10	hypothetical protein
Smp_132220	22.8721	-5.09685	0.771176	-6.6092	3.86409e-11	5.30378e-10	G protein coupled receptor fragment
Smp_132830	16.8338	6.01433	0.910129	6.60821	3.88984e-11	5.33131e-10	STARP antigen
Smp_130580	199.724	-3.70701	0.560989	-6.60799	3.89572e-11	5.33156e-10	disabled 2
Smp_139840	598.596	-1.24706	0.188907	-6.60144	4.07182e-11	5.56443e-10	kunitz type protease inhibitor 2
Smp_132270	24.4189	-5.55885	0.842524	-6.59786	4.17135e-11	5.69213e-10	poly(rC) binding protein 3
Smp_015070	478.044	-1.79752	0.272536	-6.59553	4.23753e-11	5.77402e-10	vacuolar atp synthase subunit h
Smp_085520	1202.54	-1.42795	0.216529	-6.59474	4.25993e-11	5.7961e-10	ATPase, H+ transporting, lysosomal 31 kDa, V1
Smp_059780	742.821	-2.10649	0.319513	-6.5928	4.316e-11	5.86387e-10	protoscolex specific coiled coil protein
Smp_159930	108.601	-2.34631	0.35611	-6.58871	4.43658e-11	6.01897e-10	ADP ribosylation factor 3
Smp_158230	52.0083	-3.41	0.517714	-6.58664	4.49882e-11	6.09456e-10	EF hand calcium binding domain containing protein
Smp_141230	30.8785	-4.2862	0.650826	-6.58578	4.52506e-11	6.12125e-10	dual specificity tyrosine (Y) phosphorylation
Smp_152370	891.631	-1.27215	0.193333	-6.5801	4.70136e-11	6.35056e-10	ADP ribosylation factor GTPase activating
Smp_058670	17.4019	-4.60063	0.699279	-6.5791	4.733e-11	6.3841e-10	procollagen galactosyltransferase 1
Smp_145040	289.188	-4.63909	0.70628	-6.56834	5.08791e-11	6.85049e-10	hypothetical protein
Smp_000350	30.7067	-5.40123	0.822333	-6.56818	5.09341e-11	6.85049e-10	hypothetical protein
Smp_136190	492.359	-3.53256	0.538036	-6.56566	5.18029e-11	6.95734e-10	hypothetical protein
Smp_135160	78.2767	-3.27923	0.499691	-6.56251	5.29099e-11	7.09585e-10	Dual specificity protein phosphatase 10
Smp_099500	55.3132	-4.86872	0.743047	-6.55238	5.66287e-11	7.58371e-10	Glutamate-gated chloride channel subunit 4
Smp_202930	34.5267	-4.08356	0.623857	-6.54566	5.92319e-11	7.921e-10	hypothetical protein
Smp_142490	48.2405	-3.30421	0.504987	-6.54315	6.02357e-11	8.04374e-10	Transmembrane protein 45B
Smp_188580	124.824	-3.48603	0.53294	-6.54112	6.10593e-11	8.14211e-10	hypothetical protein
Smp_151620	35.8067	-5.01397	0.767118	-6.53611	6.31384e-11	8.40737e-10	protocadherin 9
Smp_160970	361.116	2.36215	0.361655	6.5315	6.51158e-11	8.65837e-10	hypothetical protein
Smp_137610	162.938	-4.13016	0.632379	-6.53115	6.52676e-11	8.66624e-10	focal adhesion kinase 1
Smp_173880	69.0897	2.87351	0.440227	6.52733	6.69518e-11	8.87727e-10	RAD9 A
Smp_125890	197.64	2.8195	0.431989	6.52678	6.71966e-11	8.89714e-10	dna photolyase
Smp_198820	330.477	2.0901	0.320366	6.5241	6.841e-11	9.045e-10	DNA replication complex GINS protein PSF3
Smp_124840	567.346	2.30113	0.352839	6.52177	6.94835e-11	9.17397e-10	E3 ubiquitin protein ligase UBR7
Smp_158100	209.592	-2.99109	0.458726	-6.52043	7.01047e-11	9.24296e-10	hypothetical protein
Smp_196400	40.7043	-5.89454	0.904579	-6.51634	7.20456e-11	9.4855e-10	sphingosine phosphate lyase
Smp_023620	475.712	-2.08213	0.319947	-6.50774	7.62916e-11	1.00304e-09	FERM domain containing protein 5
Smp_176920	66.9733	-5.71319	0.877951	-6.50741	7.64559e-11	1.00379e-09	neuronal RhoA GEF protein
Smp_163360	161.038	-4.19993	0.645934	-6.5021	7.92066e-11	1.03845e-09	dystrophin
Smp_043990	1609.86	-1.41485	0.217666	-6.50008	8.02768e-11	1.05101e-09	basigin
Smp_097320	256.488	-1.5897	0.244649	-6.49789	8.14552e-11	1.06495e-09	hypothetical protein
Smp_130020	87.0922	2.2182	0.341608	6.49342	8.39108e-11	1.09552e-09	hypothetical protein
Smp_163190	171.912	1.69346	0.260877	6.49141	8.50375e-11	1.10869e-09	cell cycle checkpoint protein rad17
Smp_081720	62.3191	-3.81855	0.58882	-6.48509	8.86792e-11	1.15456e-09	transmembrane protein 231
Smp_054220	555.719	-1.47967	0.228179	-6.48468	8.89181e-11	1.15606e-09	vacuolar ATP synthase subunit G
Smp_153170	53.899	-3.07402	0.47432	-6.48089	9.1184e-11	1.18387e-09	striated muscle specific
Smp_150690	1042.34	1.51568	0.233897	6.48012	9.16483e-11	1.18825e-09	proliferation associated protein 2G4 38 kDa
Smp_125640	679.515	-1.7183	0.265191	-6.47948	9.20388e-11	1.19167e-09	syntaxin 12
Smp_055890	1031.19	2.6116	0.403281	6.47589	9.42557e-11	1.21868e-09	ribonucleoside diphosphate reductase subunit M2
Smp_096410	60.1941	-3.20874	0.496156	-6.46721	9.98292e-11	1.28897e-09	16 kda calcium binding protein
Smp_163090	150.013	-4.87343	0.753747	-6.46559	1.00901e-10	1.30101e-09	voltage gated potassium channel
Smp_134540	79.9116	-5.05628	0.782211	-6.46409	1.01913e-10	1.31226e-09	hypothetical protein
Smp_135730	27.5453	-5.42316	0.839441	-6.46044	1.04397e-10	1.34239e-09	protocadherin alpha 7
Smp_082830	26.7092	-4.1452	0.641749	-6.45923	1.05235e-10	1.35131e-09	Dynein intermediate chain
Smp_099670	16.3346	-6.20546	0.961301	-6.45527	1.08026e-10	1.38525e-09	lipoprotein receptor
Smp_123680	286.413	-2.03407	0.315162	-6.45405	1.08902e-10	1.39457e-09	hypothetical protein
Smp_199830	97.5692	-3.44194	0.533565	-6.45084	1.11234e-10	1.42249e-09	Leucine rich repeat protein
Smp_135820	47.3711	-5.06235	0.784941	-6.44934	1.12337e-10	1.43464e-09	defective proboscis extension response
Smp_145400	58.5987	3.16505	0.490792	6.44887	1.12688e-10	1.43715e-09	dynein heavy chain
Smp_048560	488.273	-1.87021	0.290251	-6.44342	1.16812e-10	1.48772e-09	Four and a half LIM domains protein 2
Smp_060160	118.052	-2.83674	0.440335	-6.44222	1.17738e-10	1.49748e-09	spef1-like protein
Smp_123870	767.591	-2.30771	0.358241	-6.44179	1.18069e-10	1.49966e-09	vesicle associated membrane protein
Smp_141940	72.3364	-3.98079	0.618115	-6.4402	1.19314e-10	1.51342e-09	hypothetical protein
Smp_104110	59.4968	-3.03243	0.471495	-6.43153	1.26327e-10	1.6002e-09	Ras GTP binding protein RHO
Smp_000180	42.1875	-4.4652	0.694332	-6.43093	1.26823e-10	1.60431e-09	kv channel interacting protein 1
Smp_126400	28.0691	-4.53915	0.705892	-6.43036	1.27298e-10	1.60815e-09	hypothetical protein
Smp_052880	518.062	-2.99687	0.466534	-6.4237	1.32999e-10	1.67679e-09	hypothetical protein
Smp_004160	43.8335	-3.45637	0.538074	-6.4236	1.3309e-10	1.67679e-09	hypothetical protein
Smp_067510	41.3735	-4.03439	0.628082	-6.42335	1.33306e-10	1.67726e-09	Clusterin associated protein 1
Smp_157380	81.2586	-3.77111	0.587219	-6.42198	1.34509e-10	1.69013e-09	hypothetical protein
Smp_059530	113.162	-2.39769	0.373475	-6.41995	1.36316e-10	1.71053e-09	tetraspanin
Smp_176650	549.295	-3.08556	0.481234	-6.41177	1.43841e-10	1.80254e-09	hypothetical protein
Smp_125850	18.6624	5.36598	0.838169	6.40203	1.53329e-10	1.91887e-09	hypothetical protein
Smp_162240	396.125	1.2508	0.195446	6.39971	1.55677e-10	1.94565e-09	hypothetical protein
Smp_180190	191.171	2.58472	0.404085	6.39647	1.59013e-10	1.98206e-09	hypothetical protein
Smp_017350	34.8047	-4.79863	0.750188	-6.39657	1.58905e-10	1.98206e-09	hypothetical protein
Smp_139750	75.3113	3.37434	0.527835	6.3928	1.62872e-10	2.02745e-09	signal induced proliferation associated 1
Smp_105480	73.3272	-4.18398	0.655944	-6.37857	1.78755e-10	2.22221e-09	ADP ribosylation factor protein 6 like
Smp_064350	2530.55	-2.03389	0.31892	-6.37744	1.80077e-10	2.23568e-09	Vacuolar ATP synthase 21 kDa proteolipid
Smp_078090	617.744	1.33456	0.209492	6.37045	1.88471e-10	2.33679e-09	DNA binding SAP,domain containing protein
Smp_080320	80.3725	-3.66314	0.575529	-6.36482	1.9552e-10	2.42098e-09	WD repeat containing protein 69
Smp_080820	17.3538	-4.544	0.715024	-6.35503	2.0839e-10	2.57694e-09	G protein coupled receptor fragment
Smp_147350	58.7204	-3.79533	0.597911	-6.34766	2.18613e-10	2.69978e-09	hypothetical protein
Smp_150320	1189.75	1.14559	0.180488	6.34717	2.19306e-10	2.70477e-09	tetratricopeptide repeat protein 14
Smp_007000	63.6311	2.7167	0.428211	6.34429	2.23451e-10	2.75227e-09	DNA replication complex GINS protein PSF1
Smp_153100	102.939	-4.63908	0.731353	-6.34316	2.25104e-10	2.76899e-09	hyperpolarization activated cyclic
Smp_164150	33.5822	-5.2058	0.820969	-6.34105	2.28205e-10	2.80344e-09	tau tubulin kinase 1
Smp_129810	91.3266	-4.27545	0.675213	-6.332	2.41998e-10	2.96899e-09	hypothetical protein
Smp_017880	419.299	-2.55346	0.403371	-6.33031	2.44669e-10	2.99784e-09	clathrin light chain a
Smp_019030	1211.28	1.39869	0.221017	6.32841	2.47706e-10	3.03108e-09	Cathepsin C
Smp_003190	36.6429	-4.26208	0.673708	-6.32631	2.51095e-10	3.06854e-09	Ankyrin,domain containing protein
Smp_138610	84.3569	3.08404	0.48816	6.31767	2.65529e-10	3.2407e-09	tumor protein p53 binding protein 1
Smp_159710	61.098	-3.59236	0.569112	-6.31223	2.75046e-10	3.35248e-09	carbonic anhydrase
Smp_010370	98.9959	3.07592	0.487549	6.30895	2.80928e-10	3.41972e-09	Receptor expression enhancing protein 6
Smp_147850	562.383	1.65795	0.262803	6.30873	2.8133e-10	3.42017e-09	large subunit gtpase 1
Smp_150150	103.96	-4.45755	0.706595	-6.30849	2.81767e-10	3.42104e-09	hypothetical protein
Smp_161240	30.8503	-4.13781	0.656129	-6.3064	2.85605e-10	3.46314e-09	hypothetical protein
Smp_151560	73.8086	5.56917	0.883307	6.30491	2.88356e-10	3.49198e-09	dna replication licensing factor mcm9
Smp_001100	136.265	-5.09005	0.808512	-6.29557	3.0627e-10	3.70413e-09	fibrillin 2
Smp_124290	277.707	-2.74863	0.43703	-6.28934	3.18813e-10	3.85085e-09	hypothetical protein
Smp_077580	57.3575	-3.37164	0.536134	-6.28879	3.1994e-10	3.85948e-09	hypothetical protein
Smp_072990	339.078	-2.25362	0.358471	-6.28675	3.24188e-10	3.9057e-09	Transmembrane protein 185B
Smp_170570	1213.54	1.49298	0.237499	6.28626	3.25214e-10	3.91301e-09	pre mRNA processing factor 39
Smp_155410	175.921	-3.76265	0.598909	-6.28251	3.3314e-10	3.99822e-09	Coiled coil domain containing protein 102A
Smp_103790	575.31	-4.27416	0.680326	-6.28251	3.3315e-10	3.99822e-09	hypothetical protein
Smp_042550	471.393	-1.11977	0.178362	-6.27804	3.42857e-10	4.10945e-09	sorting nexin 2
Smp_191220	14.6389	-4.97961	0.793516	-6.27537	3.48803e-10	4.17537e-09	anion exchange protein 2
Smp_072470	24.0541	-5.475	0.872511	-6.27499	3.49665e-10	4.18035e-09	neurogenic differentiation factor
Smp_172610	34.8289	5.41492	0.863549	6.27054	3.59791e-10	4.29592e-09	hypothetical protein
Smp_134190	32.1522	-4.86606	0.776182	-6.26923	3.6284e-10	4.32681e-09	#N/A
Smp_138910	93.0699	-3.48185	0.555575	-6.26711	3.67807e-10	4.38046e-09	hypothetical protein
Smp_141280	58.1556	-3.51641	0.561178	-6.26612	3.70166e-10	4.40296e-09	leucine rich repeat containing protein 23
Smp_163550	32.2313	-5.40087	0.862136	-6.26453	3.73964e-10	4.44248e-09	hypothetical protein
Smp_171470	21.4999	-4.87149	0.777723	-6.26379	3.75743e-10	4.45796e-09	hypothetical protein
Smp_159590	124.794	-3.20685	0.512175	-6.26125	3.81915e-10	4.52545e-09	hypothetical protein
Smp_128920	39.0127	-4.41131	0.704707	-6.25978	3.85509e-10	4.56227e-09	spectrin beta chain
Smp_165030	401.852	-1.65572	0.264588	-6.25773	3.90612e-10	4.61682e-09	synergin gamma
Smp_015670	42.7247	-4.26961	0.682848	-6.25265	4.03543e-10	4.76364e-09	transcription factor 15
Smp_164550	256.389	-2.34778	0.375669	-6.24959	4.11541e-10	4.84583e-09	hypothetical protein
Smp_098550	33.8777	-5.63439	0.901547	-6.24969	4.11258e-10	4.84583e-09	E3 ubiquitin protein ligase TRIM56
Smp_050640	141.117	-2.19673	0.351763	-6.24492	4.24019e-10	4.98648e-09	glut4 vesicle protein
Smp_046410	72.2946	-3.66192	0.586702	-6.24153	4.3332e-10	5.08947e-09	tektin 2 (testicular)
Smp_054780	2616.13	1.89047	0.303029	6.23857	4.41581e-10	5.18001e-09	40S ribosomal protein S8
Smp_172810	89.6754	-4.26511	0.683799	-6.23737	4.4499e-10	5.21345e-09	rhodopsin orphan gpcr
Smp_151820	77.7014	-4.1207	0.661031	-6.23375	4.55406e-10	5.32216e-09	Microtubule associated protein 9
Smp_137980	22.7906	-4.7269	0.758261	-6.23388	4.55027e-10	5.32216e-09	rhodopsin orphan GPCR
Smp_090930	622.408	1.51433	0.243156	6.22778	4.73085e-10	5.52188e-09	hypothetical protein
Smp_150130	120.895	-2.22224	0.356892	-6.22665	4.76528e-10	5.55514e-09	hypothetical protein
Smp_006190	108.733	2.02455	0.325312	6.2234	4.86493e-10	5.66425e-09	DCP2 decapping enzyme
Smp_080860	110.314	-4.09455	0.657968	-6.22302	4.87668e-10	5.67089e-09	#N/A
Smp_006730	128.745	3.27505	0.526371	6.22193	4.91066e-10	5.70331e-09	DNA damage regulated autophagy modulator protein
Smp_074710	79.648	-3.25127	0.522658	-6.22065	4.95101e-10	5.74305e-09	Def8 protein
Smp_080530	440.298	1.93	0.310371	6.21837	5.02358e-10	5.81282e-09	replication protein A 32 kDa subunit
Smp_139400	46.0545	-4.19916	0.675273	-6.21846	5.02044e-10	5.81282e-09	tensin 1
Smp_058470	80.0601	-4.68456	0.754553	-6.20839	5.35294e-10	6.18628e-09	Innexin unc 7
Smp_149490	13.4066	5.62154	0.905988	6.20488	5.47383e-10	6.31017e-09	hypothetical protein
Smp_171150	368.102	1.31216	0.211479	6.20469	5.48037e-10	6.31017e-09	protein arginine N methyltransferase 5
Smp_122810	101.941	-2.9862	0.481255	-6.20504	5.46844e-10	6.31017e-09	MEChanosensory abnormality family member
Smp_150840	155.762	1.91877	0.309347	6.20264	5.55236e-10	6.38522e-09	Cell growth regulating nucleolar protein
Smp_137370	149.869	-4.26414	0.687528	-6.20213	5.5703e-10	6.39798e-09	cyclin dependent kinase 16
Smp_085540	1340.25	-3.33492	0.538536	-6.19257	5.91893e-10	6.79008e-09	myosin heavy chain
Smp_159440	234.734	-2.7236	0.43997	-6.19042	6.0005e-10	6.87523e-09	schwannomin interacting protein
Smp_127480	90.8958	-2.96817	0.479534	-6.18969	6.02812e-10	6.89843e-09	von Willebrand factor A domain containing 3B
Smp_132210	142.668	-1.76467	0.285357	-6.18408	6.24638e-10	7.13949e-09	f box only protein 32
Smp_141540	366.753	2.2958	0.371298	6.18319	6.282e-10	7.17144e-09	Thymidine kinase 2, mitochondrial
Smp_169360	41.5439	-4.10411	0.66476	-6.17383	6.6657e-10	7.6002e-09	kinesin protein kif26a
Smp_123480	248.271	-3.52751	0.571419	-6.17325	6.69019e-10	7.61885e-09	serine:threonine kinase 33
Smp_150060	77.8863	-2.92783	0.474342	-6.1724	6.72592e-10	7.65023e-09	tripartite motif containing protein 3
Smp_146420	78.2414	3.34947	0.542674	6.17217	6.73594e-10	7.65232e-09	Spindle assembly checkpoint component MAD1
Smp_012670	103.158	-2.51947	0.408216	-6.1719	6.7474e-10	7.65605e-09	hypothetical protein
Smp_179750	107.343	-3.98603	0.645918	-6.1711	6.78162e-10	7.68556e-09	protocadherin 1
Smp_203630	194.551	2.09919	0.340179	6.17083	6.79333e-10	7.68953e-09	hypothetical protein
Smp_158660	55.0553	-3.77224	0.611804	-6.16576	7.01432e-10	7.93008e-09	tctex1 domain containing protein 2
Smp_078400	499.196	-1.65284	0.268159	-6.16364	7.10934e-10	8.02781e-09	N acetylgalactosamine kinase
Smp_160160	48.847	-2.59675	0.421373	-6.16259	7.15642e-10	8.07123e-09	solute carrier family 17
Smp_048080	47.3843	3.37391	0.547736	6.15974	7.28653e-10	8.20809e-09	large subunit gtpase 1
Smp_126530	48.8364	-3.2552	0.528604	-6.1581	7.36215e-10	8.2833e-09	v ets erythroblastosis virus E26 oncogene
Smp_075720	50.5458	4.18957	0.681353	6.14891	7.80188e-10	8.76751e-09	Sm23
Smp_025410	130.703	-2.16002	0.351536	-6.14453	8.02011e-10	9.00195e-09	calcium dependent mitochondrial carrier protein
Smp_135900	86.8373	3.73669	0.608198	6.14387	8.05371e-10	9.02584e-09	DNA double strand break repair rad50 ATPase
Smp_194530	88.2684	3.00159	0.488562	6.14373	8.06068e-10	9.02584e-09	adenylate kinase isoenzyme 5
Smp_036720	59.6135	-3.80745	0.619784	-6.14319	8.08813e-10	9.04576e-09	hypothetical protein
Smp_141980	63.2217	-3.91037	0.636882	-6.13987	8.25903e-10	9.22586e-09	cAMP specific 3',5' cyclic phosphodiesterase 4D
Smp_181080	63.5361	-4.65044	0.758164	-6.13381	8.57987e-10	9.57285e-09	hypothetical protein
Smp_084780	29.5728	-3.89509	0.635103	-6.13301	8.62305e-10	9.60957e-09	hypothetical protein
Smp_170810	16.6101	-5.68308	0.926815	-6.13183	8.68727e-10	9.66963e-09	FMRFamide activated amiloride sensitive sodium
Smp_162180	26.4899	-3.58772	0.585237	-6.13036	8.76787e-10	9.74775e-09	cysteine and glycine rich protein 2
Smp_059340	896.523	-1.03542	0.169082	-6.12381	9.13662e-10	1.01457e-08	guanine nucleotide binding protein G(s) subunit
Smp_103740	756.978	-1.50793	0.246292	-6.12251	9.21098e-10	1.02161e-08	calmodulin related calcium binding protein
Smp_127310	39.5957	-4.9626	0.811385	-6.11621	9.58264e-10	1.06158e-08	Type 2 dopamine receptor
Smp_008360	640.522	1.96044	0.320615	6.11463	9.6779e-10	1.07046e-08	adenosine kinase
Smp_076500	94.7689	-3.81416	0.623789	-6.1145	9.68574e-10	1.07046e-08	dystrophin,s A:C:F:G:H
Smp_074280	36.9349	-3.41807	0.559667	-6.10733	1.01312e-09	1.11837e-08	hypothetical protein
Smp_147380	24.9395	-5.1261	0.839851	-6.10359	1.03713e-09	1.14218e-08	#N/A
Smp_157790	67.042	-5.8161	0.95289	-6.10364	1.0368e-09	1.14218e-08	nAChR subunit
Smp_060480	322.226	-1.73099	0.283663	-6.10228	1.04567e-09	1.15024e-08	copine 9
Smp_128710	60.1255	-4.53125	0.742577	-6.10206	1.04708e-09	1.15044e-08	g protein coupled receptor
Smp_186780	35.6329	-4.44743	0.729338	-6.0979	1.0747e-09	1.1794e-08	hypothetical protein
Smp_135340	31.3411	-3.60249	0.590948	-6.09612	1.08674e-09	1.19121e-08	discoidin domain receptor
Smp_070000	68.8689	-2.21506	0.363382	-6.09569	1.08966e-09	1.19302e-08	hypothetical protein
Smp_018710	472.283	-1.12863	0.185256	-6.09228	1.11315e-09	1.21732e-08	DDB1 and CUL4 associated factor 7
Smp_028440	1028.29	1.53369	0.251885	6.08886	1.13716e-09	1.24212e-08	adenosylhomocysteinase
Smp_200610	129.218	-3.71606	0.610561	-6.0863	1.15548e-09	1.26066e-08	hypothetical protein
Smp_148150	654.286	1.54397	0.25372	6.08532	1.16258e-09	1.26692e-08	Double strand break repair protein rad21
Smp_176950	19.0103	-5.92189	0.973582	-6.08259	1.18259e-09	1.28724e-08	hypothetical protein
Smp_163740	88.7577	-4.58556	0.753959	-6.08197	1.18713e-09	1.29068e-08	nesprin 1
Smp_125940	189.644	-4.14999	0.682542	-6.0802	1.20034e-09	1.30352e-08	hypothetical protein
Smp_017720	27.6025	4.04931	0.666496	6.07552	1.23589e-09	1.34058e-08	zinc finger protein
Smp_043940	210.547	-1.34623	0.22162	-6.07452	1.24361e-09	1.34738e-08	synaptosomal associated protein 29
Smp_094630	1153.75	0.878329	0.144637	6.07265	1.25819e-09	1.3616e-08	nuclear receptor coactivator 5
Smp_146260	103.446	-3.43036	0.564914	-6.07236	1.26046e-09	1.36249e-08	calcium activated potassium channel subunit
Smp_163720	768.542	-1.98016	0.32616	-6.07111	1.27027e-09	1.37151e-08	endophilin B1
Smp_128970	663.136	1.23309	0.203118	6.07081	1.27268e-09	1.37253e-08	inhibitor of growth protein 3
Smp_173610	57.3288	-3.66171	0.603381	-6.06866	1.28984e-09	1.38943e-08	hypothetical protein
Smp_213950	159.447	2.85179	0.469986	6.06782	1.29657e-09	1.39348e-08	citron Rho interacting kinase
Smp_132840	41.2799	-4.48649	0.73938	-6.06791	1.29583e-09	1.39348e-08	tripartite motif protein trim
Smp_057530	51.4996	-4.38613	0.72341	-6.06312	1.33502e-09	1.43315e-08	subfamily S9B unassigned peptidase (S09 family)
Smp_188320	53.0106	-2.93712	0.485355	-6.0515	1.43506e-09	1.53878e-08	hypothetical protein
Smp_193610	13.1392	-5.71745	0.944874	-6.05102	1.43933e-09	1.54159e-08	hypothetical protein
Smp_160490	40.7889	-4.15768	0.687313	-6.04917	1.45593e-09	1.55759e-08	ankyrin repeat and MYND domain containing protein
Smp_134200	37.5396	-4.8234	0.797757	-6.04621	1.48296e-09	1.5847e-08	WD repeat containing protein 16
Smp_211180	139.98	-2.51526	0.416109	-6.04471	1.49681e-09	1.59768e-08	#N/A
Smp_045360	745.13	-2.72483	0.450868	-6.04353	1.50779e-09	1.60757e-08	calsyntenin 2
Smp_153700	59.5493	-4.12092	0.681967	-6.0427	1.51554e-09	1.61347e-08	hypothetical protein
Smp_167400	22.566	-5.04113	0.834269	-6.04257	1.51677e-09	1.61347e-08	transcription factor sum 1
Smp_137300	11.8862	-5.07035	0.839387	-6.04054	1.53603e-09	1.63209e-08	amine GPCR
Smp_128930	61.4196	-4.13828	0.685191	-6.0396	1.54499e-09	1.63976e-08	spectrin beta chain
Smp_142880	45.8617	-5.36122	0.887722	-6.03931	1.54777e-09	1.64085e-08	protein tag d
Smp_032950	1201.08	2.93127	0.48588	6.0329	1.61042e-09	1.70533e-08	Calcium binding EF hand,domain containing protein
Smp_179900	31.9702	-4.60857	0.763939	-6.03263	1.61308e-09	1.70622e-08	#N/A
Smp_000890	220.137	1.71814	0.284848	6.03179	1.6215e-09	1.71319e-08	nucleoporin nup53
Smp_139220	80.6609	-3.92159	0.65046	-6.02895	1.65027e-09	1.74162e-08	hypothetical protein
Smp_125200	22.2241	-5.72831	0.950378	-6.0274	1.66618e-09	1.75643e-08	Aquaporin 9 (AQP 9) (Small solute channel 1)
Smp_141960	60.9297	-2.80056	0.465153	-6.02071	1.73649e-09	1.82849e-08	ankyrin repeat domain containing protein 60
Smp_157050	153.082	-4.03065	0.669742	-6.01822	1.76348e-09	1.85274e-08	rhodopsin orphan GPCR
Smp_158460	113.656	-4.11506	0.683761	-6.01827	1.76295e-09	1.85274e-08	breast cancer anti estrogen resistance protein
Smp_000300	162.388	-3.35494	0.557923	-6.01327	1.81819e-09	1.90808e-08	WD repeat containing protein 19
Smp_065890	787.977	-1.41684	0.235801	-6.00864	1.87089e-09	1.95978e-08	toll interacting protein
Smp_179620	94.2047	-1.94543	0.323775	-6.00857	1.87164e-09	1.95978e-08	hypothetical protein
Smp_154370	54.6051	3.13711	0.522271	6.00667	1.89373e-09	1.98069e-08	outer dense fiber protein 3
Smp_062970	47.2747	-4.36024	0.725991	-6.00592	1.90254e-09	1.98768e-08	WD repeat containing protein 65
Smp_193300	12.8621	-5.94136	0.989288	-6.0057	1.90513e-09	1.98818e-08	hypothetical protein
Smp_194780	107.842	-4.21517	0.702505	-6.0002	1.9708e-09	2.05441e-08	neurotracting:lsamp:neurotrimin:obcam
Smp_005720	785.38	-3.26298	0.544444	-5.99323	2.05709e-09	2.14199e-08	Aquaporin 3 (AQP 3)
Smp_171740	57.0413	-3.45559	0.57686	-5.99034	2.09404e-09	2.17803e-08	multidrug resistance associated protein 1
Smp_139080	229.316	2.01731	0.336978	5.98646	2.14456e-09	2.22684e-08	bestrophin
Smp_152480	16.8873	-6.0794	1.01554	-5.98637	2.14572e-09	2.22684e-08	cyclic nucleotide gated cation channel
Smp_126990	904.211	-2.92063	0.487899	-5.98614	2.14885e-09	2.22761e-08	synapsin
Smp_132700	64.8136	-4.62638	0.773112	-5.9841	2.17592e-09	2.25319e-08	nephrin
Smp_204150	59.1121	-2.64795	0.442829	-5.97962	2.23655e-09	2.31341e-08	hypothetical protein
Smp_162680	19.5121	-4.19703	0.702742	-5.97237	2.33838e-09	2.41607e-08	FMRFamide activated amiloride sensitive sodium
Smp_015840	505.03	1.14772	0.192228	5.97064	2.36322e-09	2.43904e-08	zinc finger and SCAN domain containing protein
Smp_120700	1921.88	-1.85571	0.311053	-5.9659	2.43294e-09	2.50824e-08	Cofilin 1
Smp_095360	4000.55	2.32784	0.390234	5.96524	2.44282e-09	2.51565e-08	14 kDa fatty acid-binding protein
Smp_171020	241.015	-4.15528	0.696704	-5.96421	2.45824e-09	2.52875e-08	calsyntenin
Smp_137090	89.947	4.61127	0.773357	5.96266	2.48161e-09	2.54998e-08	BRCA1 associated RING domain protein 1
Smp_169410	34.9874	3.9069	0.655332	5.96171	2.49615e-09	2.56211e-08	hypothetical protein
Smp_137810	88.9483	-4.2191	0.707787	-5.96098	2.50734e-09	2.57078e-08	hypothetical protein
Smp_020130	90.6672	-4.88089	0.818842	-5.96072	2.51127e-09	2.57199e-08	hypothetical protein
Smp_157240	267.924	-3.21726	0.539996	-5.95793	2.55455e-09	2.61346e-08	cyclin dependent kinase 1
Smp_137930	35.5819	-3.0073	0.504806	-5.95733	2.56393e-09	2.62019e-08	hypothetical protein
Smp_177240	51.4676	1.96466	0.329823	5.95673	2.57334e-09	2.62694e-08	twinkle protein, mitochondrial
Smp_045470	17.1163	-4.80695	0.807242	-5.95479	2.60412e-09	2.65546e-08	prospero homeobox protein 2
Smp_196370	22.2385	-5.19859	0.87313	-5.95397	2.61722e-09	2.66592e-08	potassium voltage gated channel subfamily H
Smp_134980	139.011	1.97653	0.332573	5.94314	2.79616e-09	2.84509e-08	oxalate:formate antiporter
Smp_140170	29.3349	-5.8734	0.989201	-5.93752	2.89365e-09	2.94109e-08	irregular chiasm C roughest protein
Smp_152290	131.518	-3.6173	0.609558	-5.9343	2.95101e-09	2.99614e-08	beta arrestin 1
Smp_093210	763.98	-5.1967	0.87584	-5.93339	2.96746e-09	3.00958e-08	FMRFamide activated amiloride sensitive sodium
Smp_133750	49.2962	-3.02571	0.510002	-5.93275	2.97907e-09	3.01808e-08	hypothetical protein
Smp_193050	53.9231	-3.60136	0.607368	-5.92946	3.0394e-09	3.07587e-08	hypothetical protein
Smp_024820	956.163	-1.72036	0.290377	-5.92456	3.13129e-09	3.16544e-08	tetraspanin family protein 16 invertebrate
Smp_199420	52.6374	-2.65482	0.448744	-5.91611	3.29647e-09	3.32883e-08	calcium:calmodulin dependent protein kinase type
Smp_135930	85.0116	-2.50039	0.422661	-5.91583	3.3021e-09	3.33092e-08	zinc finger MYND domain containing protein
Smp_088060	46.8719	-3.70019	0.625934	-5.91146	3.3909e-09	3.41681e-08	innexin unc
Smp_147260	215.494	-4.57764	0.774656	-5.90926	3.43654e-09	3.45908e-08	RAS, family 10, member B like
Smp_012740	374.26	-0.995146	0.168455	-5.90748	3.47375e-09	3.49278e-08	ankyrin repeat and MYND domain containing protein
Smp_158330	30.4603	-4.25552	0.721361	-5.8993	3.65056e-09	3.66662e-08	coiled coil domain containing protein C6orf97
Smp_142240	11.2832	-5.2174	0.884829	-5.89651	3.71278e-09	3.72511e-08	hypothetical protein
Smp_131870	544.253	-2.14376	0.363872	-5.89153	3.82635e-09	3.83085e-08	syntaxin binding protein 1
Smp_168450	79.7303	-2.86139	0.48567	-5.89164	3.82375e-09	3.83085e-08	glycoprotein N acetylgalactosamine
Smp_161210	29.9188	-5.313	0.902527	-5.88681	3.93717e-09	3.93759e-08	hypothetical protein
Smp_146450	31.7905	-3.65718	0.62133	-5.88605	3.95546e-09	3.95166e-08	hypothetical protein
Smp_032490	200.723	3.24205	0.550989	5.88405	4.00347e-09	3.99536e-08	tropomyosin
Smp_070020	162.15	-4.01537	0.683154	-5.8777	4.16003e-09	4.14277e-08	rhoptry associated membrane antigen
Smp_171480	28.4073	-4.55476	0.774901	-5.87786	4.156e-09	4.14277e-08	hypothetical protein
Smp_201950	21.1567	-3.97746	0.677402	-5.87164	4.31496e-09	4.29249e-08	hypothetical protein
Smp_096450	1087.01	1.25828	0.214406	5.86871	4.39207e-09	4.36456e-08	116 kDa U5 small nuclear ribonucleoprotein
Smp_154350	15.8273	-4.14071	0.705969	-5.86529	4.48349e-09	4.44597e-08	hypothetical protein
Smp_145380	72.1759	-4.17329	0.711505	-5.86544	4.47931e-09	4.44597e-08	Beta ketoacyl synthase,domain containing protein
Smp_162500	20.945	-4.08645	0.697285	-5.86051	4.61444e-09	4.57098e-08	drug efflux protein
Smp_143480	605.997	-2.21273	0.377602	-5.85997	4.62943e-09	4.58098e-08	hypothetical protein
Smp_101450	2784.24	1.71999	0.293549	5.8593	4.64826e-09	4.59476e-08	large subunit ribosomal protein l7e
Smp_180240	1225.52	-3.44419	0.587943	-5.85803	4.68382e-09	4.62502e-08	f spondin
Smp_045300	41.8321	-4.16625	0.711623	-5.85457	4.78234e-09	4.71733e-08	PDZ and LIM domain protein 2
Smp_156770	449.978	-2.93757	0.501773	-5.85438	4.78804e-09	4.71799e-08	major tegumental antigen SM15
Smp_078310	573.559	1.36068	0.232437	5.85398	4.79952e-09	4.72432e-08	ran binding protein
Smp_068840	50.6496	2.91744	0.498444	5.8531	4.82494e-09	4.74436e-08	ous pairing protein 2 homolog
Smp_000410	31.1374	5.27449	0.901785	5.84895	4.94695e-09	4.85413e-08	Trematode Eggshell Synthesis,domain containing protein
Smp_145640	116.865	-1.81265	0.309909	-5.84898	4.94596e-09	4.85413e-08	forkhead protein: forkhead protein domain
Smp_023470	67.9648	-3.98377	0.681165	-5.84846	4.96148e-09	4.86329e-08	kynureninase
Smp_101670	118.792	2.22677	0.381186	5.8417	5.16722e-09	5.05966e-08	5' AMP activated protein kinase subunit beta 2
Smp_038440	63.1514	-4.38597	0.751354	-5.83742	5.30161e-09	5.18583e-08	heart specific myosin light chain phosphatase
Smp_165550	478.314	1.28455	0.22013	5.83541	5.36589e-09	5.23776e-08	AFG3 protein 1 like
Smp_131690	175.495	-3.26291	0.559156	-5.83543	5.36531e-09	5.23776e-08	peripheral plasma membrane protein CASK
Smp_100080	104.8	-2.32832	0.399164	-5.833	5.44405e-09	5.30852e-08	Tetraspanin,IPR000301 CD9:CD37:CD63
Smp_105970	2685.63	1.75995	0.301919	5.82922	5.56885e-09	5.42456e-08	Caprin 1
Smp_209000	39.1412	-3.36353	0.577074	-5.8286	5.5895e-09	5.43902e-08	IQ motif containing B1
Smp_154840	397.921	1.24483	0.213666	5.82604	5.67593e-09	5.51738e-08	hypothetical protein
Smp_075500	67.2315	-3.50633	0.602322	-5.82135	5.83737e-09	5.66843e-08	hypothetical protein
Smp_210300	1199.16	1.98848	0.341746	5.8186	5.9344e-09	5.75667e-08	phospholipase DDHD1
Smp_085150	631.622	-1.24415	0.213966	-5.81473	6.07332e-09	5.88533e-08	phosphoglucomutase 2
Smp_069890	68.3529	-3.30427	0.569144	-5.80567	6.41075e-09	6.19949e-08	hypothetical protein
Smp_180760	28.2487	-4.46851	0.769667	-5.80577	6.40726e-09	6.19949e-08	neurexin
Smp_083220	19.5967	-5.16802	0.890587	-5.80294	6.51634e-09	6.29509e-08	protocadherin gamma
Smp_159370	39.6069	-4.313	0.743332	-5.80225	6.54319e-09	6.31452e-08	endothelin converting enzyme 1
Smp_133370	36.4617	-3.39064	0.584445	-5.80147	6.57368e-09	6.33522e-08	tetratricopeptide repeat protein 39B
Smp_161600	30.3897	-5.44229	0.938107	-5.80135	6.57818e-09	6.33522e-08	sox transcription factor
Smp_124130	74.6448	-3.77733	0.651258	-5.80006	6.62924e-09	6.37784e-08	cyclin dependent kinase 1
Smp_130570	22.8584	-4.78863	0.826593	-5.79321	6.90532e-09	6.63662e-08	receptor type tyrosine protein phosphatase
Smp_158680	92.2717	2.70114	0.466463	5.79069	7.00985e-09	6.73017e-08	molybdopterin biosynthesis protein
Smp_173120	203.697	-1.35509	0.23408	-5.78898	7.08145e-09	6.79195e-08	presqualene diphosphate phosphatase
Smp_159360	108.457	-3.41518	0.590422	-5.78431	7.28115e-09	6.97634e-08	growth arrest specific 2
Smp_162140	62.4747	-3.22716	0.558171	-5.78167	7.39606e-09	7.07919e-08	dynein light chain
Smp_140860	11.5034	-5.6387	0.975344	-5.78124	7.41526e-09	7.09032e-08	innexin unc 9
Smp_098650	95.0027	-2.8341	0.490401	-5.77915	7.50789e-09	7.17157e-08	estrogen receptor beta1
Smp_026440	38.7715	-2.6427	0.457295	-5.77897	7.51574e-09	7.17174e-08	dpy 30 protein
Smp_124340	13.5039	4.68853	0.811881	5.7749	7.69997e-09	7.33614e-08	Nose resistant to fluoxetine protein 6
Smp_150220	3382.69	-3.04529	0.527339	-5.77482	7.70369e-09	7.33614e-08	protein tyrosine phosphatase, receptor type, N
Smp_051420	195.805	1.25534	0.217496	5.77177	7.8441e-09	7.46226e-08	eri1 exoribonuclease 2
Smp_152380	90.0242	-4.49731	0.779442	-5.76991	7.93139e-09	7.53764e-08	hypothetical protein
Smp_127420	169.524	-3.28972	0.570304	-5.76836	8.00461e-09	7.59951e-08	5' AMP activated protein kinase subunit gamma
Smp_195120	109.741	3.11904	0.540783	5.76763	8.0392e-09	7.62461e-08	KRAB A domain containing protein
Smp_199690	51.0509	-3.8568	0.669325	-5.76222	8.30154e-09	7.86546e-08	cardioacceleratory peptide receptor
Smp_001070	86.4072	-3.51398	0.610143	-5.75928	8.44725e-09	7.99542e-08	G protein coupled receptor fragment
Smp_169150	15.5385	-5.55216	0.964311	-5.75764	8.5296e-09	8.06521e-08	short transient receptor potential channel 3
Smp_210740	584.641	-1.50572	0.261693	-5.75378	8.72711e-09	8.24364e-08	Actin protein 3
Smp_050470	274.105	2.25655	0.392672	5.74666	9.10246e-09	8.58088e-08	transducin beta protein 3 like
Smp_131840	172.824	1.51518	0.263659	5.74675	9.09747e-09	8.58088e-08	25 kDa integral membrane protein
Smp_129000	103.196	-2.40279	0.418264	-5.74467	9.21008e-09	8.6736e-08	hypothetical protein
Smp_089460	1955.82	-2.02651	0.352865	-5.74301	9.30077e-09	8.7502e-08	calpain A
Smp_162760	18.6599	-5.8467	1.01873	-5.73922	9.51161e-09	8.93958e-08	homeobox protein prospero:prox 1:ceh 26
Smp_199260	107.307	-4.44577	0.774658	-5.73901	9.52332e-09	8.9416e-08	vesicular amine transporter
Smp_178230	57.5872	-3.60016	0.627541	-5.73693	9.64097e-09	9.04299e-08	hypothetical protein
Smp_047550	43.3272	-3.41762	0.596731	-5.72724	1.0208e-08	9.56525e-08	MORN repeat containing protein 3
Smp_022760	52.6741	-3.31217	0.578822	-5.72227	1.05111e-08	9.83941e-08	hypothetical protein
Smp_149460	34.3812	-4.13851	0.723645	-5.71898	1.07167e-08	1.00218e-07	Tyrosine Kinase, TK group, SYK family
Smp_176830	34.2284	-3.69541	0.646768	-5.71366	1.1057e-08	1.03298e-07	hypothetical protein
Smp_141410	134.479	-1.92933	0.337694	-5.71324	1.10846e-08	1.03452e-07	cell adhesion molecule
Smp_043030	206.803	-3.73217	0.653313	-5.71269	1.11207e-08	1.03686e-07	hexokinase
Smp_095580	265.88	-1.48196	0.259467	-5.71155	1.11954e-08	1.04278e-07	lysocardiolipin acyltransferase 1
Smp_025550	354.496	1.59808	0.280271	5.70191	1.18471e-08	1.10239e-07	protein arginine N methyltransferase 7
Smp_093780	186.451	-2.92741	0.513438	-5.70157	1.18706e-08	1.10348e-07	peroxiredoxins, prx 1, prx 2, prx 3
Smp_166930	421.573	-1.52797	0.268002	-5.70132	1.18881e-08	1.10401e-07	ADP ribosylation factor protein 8B like
Smp_111980	64.321	1.97386	0.346236	5.7009	1.19173e-08	1.10563e-07	hypothetical protein
Smp_167960	24.8412	-4.11129	0.721514	-5.69814	1.2112e-08	1.12258e-07	hypothetical protein
Smp_210110	24.3529	4.50121	0.790005	5.6977	1.21438e-08	1.1235e-07	mitotic checkpoint serine:threonine protein
Smp_069600	176.896	3.1482	0.552543	5.69766	1.2146e-08	1.1235e-07	ATP dependent DNA helicase Q4
Smp_097490	82.0229	-2.79188	0.490463	-5.69233	1.25315e-08	1.15767e-07	tubulin polymerization promoting protein family
Smp_126680	17.4217	-3.94682	0.693371	-5.69222	1.25401e-08	1.15767e-07	hypothetical protein
Smp_173530	13.0524	-4.62928	0.813378	-5.69142	1.25985e-08	1.16191e-07	hypothetical protein
Smp_046190	358.555	-1.29449	0.227507	-5.68989	1.27124e-08	1.17127e-07	ankyrin repeat and socs box protein 13
Smp_127170	42.5175	-4.88799	0.859141	-5.68939	1.27493e-08	1.17352e-07	hypothetical protein
Smp_157710	536.391	-1.27347	0.223857	-5.68878	1.27952e-08	1.17658e-07	phosphoacetylglucosamine mutase
Smp_140850	15.2775	-5.3164	0.935107	-5.68534	1.30549e-08	1.19929e-07	innexin unc 9
Smp_158720	51.3636	-4.91927	0.865612	-5.68299	1.32361e-08	1.21474e-07	protein kinase
Smp_063150	25.659	-4.37472	0.77004	-5.68116	1.33784e-08	1.22659e-07	hypothetical protein
Smp_130070	92.1134	-3.4487	0.607439	-5.67745	1.36717e-08	1.25226e-07	nephrin
Smp_120790	116.843	-1.68535	0.296895	-5.67658	1.37411e-08	1.25739e-07	hypothetical protein
Smp_131210	55.1292	-4.30812	0.759004	-5.67601	1.37873e-08	1.26038e-07	#N/A
Smp_162710	260.086	2.11862	0.373514	5.67213	1.41037e-08	1.28804e-07	serine:threonine protein kinase 6
Smp_145230	33.2889	-5.08019	0.896755	-5.66508	1.46956e-08	1.34079e-07	T box transcription factor TBX3
Smp_160440	257.914	1.47502	0.260654	5.65894	1.5231e-08	1.38829e-07	zinc finger protein 91
Smp_133990	43.1907	4.71124	0.832737	5.65753	1.53566e-08	1.39837e-07	DNA topoisomerase 2 binding protein 1
Smp_124120	181.336	2.32278	0.410587	5.65722	1.53847e-08	1.39939e-07	dna polymerase epsilon subunit 2
Smp_126770	558.746	-1.34463	0.237691	-5.65707	1.53976e-08	1.39939e-07	Islet cell autoantigen 1
Smp_204020	19.8953	-5.86225	1.03648	-5.6559	1.55031e-08	1.40761e-07	hypothetical protein
Smp_204110	43.8473	-2.65119	0.468763	-5.65571	1.55206e-08	1.40783e-07	hypothetical protein
Smp_144210	85.1011	-4.0187	0.710704	-5.65454	1.56263e-08	1.41605e-07	death associated protein kinase 1
Smp_170870	261.749	2.99029	0.528851	5.65431	1.56474e-08	1.41659e-07	PDZ domain containing protein GIPC3
Smp_090010	16.0889	-4.27809	0.756817	-5.65275	1.57905e-08	1.42816e-07	molybdenum cofactor biosynthesis protein C
Smp_166820	125.157	2.85659	0.505571	5.65022	1.6024e-08	1.44788e-07	hypothetical protein
Smp_076710	275.316	2.25145	0.399085	5.64154	1.6854e-08	1.51976e-07	hypothetical protein
Smp_127360	17.4393	-4.62807	0.820375	-5.6414	1.68669e-08	1.51976e-07	hypothetical protein
Smp_153580	21.8448	-4.99763	0.885886	-5.64139	1.68681e-08	1.51976e-07	hypothetical protein
Smp_118040	53.6114	-4.14447	0.734843	-5.63994	1.70108e-08	1.53114e-07	neuropeptide receptor
Smp_052150	115.998	-2.22762	0.395294	-5.63535	1.74703e-08	1.57098e-07	hypothetical protein
Smp_029390	1054.25	-1.43796	0.255183	-5.63502	1.75041e-08	1.57252e-07	vacuolar V type H(+) ATPase B subunit
Smp_210130	282.574	-3.07012	0.544974	-5.63352	1.7657e-08	1.58473e-07	C Jun amino terminal kinase interacting protein
Smp_140140	24.1169	-4.88516	0.867734	-5.62979	1.8043e-08	1.61782e-07	tetraspanin CD63 receptor
Smp_212290	23.6655	-4.39441	0.781448	-5.62342	1.8721e-08	1.677e-07	dynein heavy chain
Smp_159450	60.1444	-3.75271	0.667993	-5.61789	1.93299e-08	1.7299e-07	anosmin 1
Smp_128760	83.052	-4.12896	0.736996	-5.60242	2.11376e-08	1.88987e-07	hypothetical protein
Smp_144310	87.4353	-4.28116	0.764208	-5.60208	2.11791e-08	1.89177e-07	potassium voltage gated channel subfamily KQT
Smp_126590	47.0337	-4.26875	0.762117	-5.60117	2.12911e-08	1.89996e-07	hypothetical protein
Smp_141420	24.6998	-4.41902	0.789228	-5.59917	2.15381e-08	1.92017e-07	hypothetical protein
Smp_000510	187.419	-1.77143	0.316405	-5.5986	2.16085e-08	1.92462e-07	hypothetical protein
Smp_134430	80.9019	-3.24494	0.579671	-5.59791	2.16957e-08	1.92948e-07	#N/A
Smp_129600	15.4683	-5.00438	0.893985	-5.59784	2.17043e-08	1.92948e-07	hypothetical protein
Smp_173440	183.673	1.66394	0.297438	5.59423	2.21602e-08	1.96813e-07	Fanconi anemia group J protein
Smp_123860	126.07	-4.28294	0.765825	-5.59258	2.23718e-08	1.98504e-07	neurexin 2 alpha
Smp_126010	34.9805	-3.81053	0.681581	-5.59072	2.26128e-08	2.00453e-07	neuropeptide Y receptor invertebrate
Smp_024180	374.013	2.41527	0.432111	5.58947	2.27762e-08	2.01711e-07	placenta specific gene 8 protein
Smp_131600	17.7924	-5.49805	0.984191	-5.58636	2.31875e-08	2.05159e-07	cadherin
Smp_138900	22.9213	-4.70114	0.842231	-5.58177	2.38081e-08	2.10451e-07	hypothetical protein
Smp_161850	160.732	-3.39244	0.607883	-5.58074	2.39496e-08	2.11502e-07	monocarboxylate transporter
Smp_146210	50.0395	-2.83504	0.508282	-5.57768	2.43742e-08	2.15049e-07	nucleoside diphosphate kinase
Smp_153970	256.28	-2.20089	0.394612	-5.57734	2.44231e-08	2.15277e-07	RILP protein
Smp_152470	66.9828	-3.65144	0.654912	-5.57546	2.46878e-08	2.17202e-07	enolase protein ENO4
Smp_202290	22.9223	-5.43352	0.974536	-5.5755	2.46821e-08	2.17202e-07	hypothetical protein
Smp_140690	94.2509	2.30186	0.412984	5.57371	2.4937e-08	2.19188e-07	DNA directed RNA polymerase I subunit RPA2
Smp_197770	353.73	-3.54099	0.635677	-5.57042	2.54124e-08	2.23157e-07	ERC protein 2
Smp_162800	17.592	-3.97969	0.714876	-5.56696	2.59216e-08	2.27415e-07	protein kinase
Smp_149120	109.355	1.57012	0.282094	5.56595	2.60723e-08	2.2831e-07	insect origin recognition complex subunit
Smp_137490	62.2115	-4.58278	0.823341	-5.56607	2.60544e-08	2.2831e-07	PDZ domain protein
Smp_076650	63.6791	2.09959	0.37726	5.56537	2.61599e-08	2.28648e-07	ORAI calcium release activated calcium modulator
Smp_001780	32.6874	-3.27575	0.588589	-5.56543	2.61502e-08	2.28648e-07	hypothetical protein
Smp_170430	24.7925	-3.23221	0.58084	-5.56471	2.62588e-08	2.29299e-07	D aspartate oxidase
Smp_128370	61.5016	-4.12224	0.742355	-5.55292	2.80945e-08	2.451e-07	glutamate synthase
Smp_124930	53.1824	-3.90528	0.703735	-5.54937	2.86707e-08	2.49895e-07	neuropilin (nrp) and tolloid (tll)
Smp_156890	70.4439	-4.28656	0.772771	-5.547	2.9061e-08	2.53061e-07	hypothetical protein
Smp_149770	21.5738	-5.36683	0.968332	-5.54235	2.98447e-08	2.59643e-07	5 hydroxytryptamine receptor 1A
Smp_127770	52.6556	-4.09074	0.738113	-5.54216	2.9876e-08	2.59674e-07	ras GTP exchange factor
Smp_203390	398.369	1.43907	0.259773	5.53971	3.02974e-08	2.63093e-07	hypothetical protein
Smp_132010	33.6414	-3.53898	0.638956	-5.53869	3.04751e-08	2.6439e-07	hypothetical protein
Smp_194610	76.9653	-3.36924	0.608826	-5.534	3.13006e-08	2.71301e-07	cAMP dependent protein kinase catalytic subunit
Smp_101970	1286.98	2.86476	0.517789	5.53268	3.15375e-08	2.73101e-07	Placenta specificprotein 8 protein (C15 protein)
Smp_031430	32.9133	-2.98221	0.539381	-5.52894	3.22169e-08	2.78727e-07	hypothetical protein
Smp_161100	9.70045	-5.48961	0.993579	-5.52508	3.29328e-08	2.84657e-07	FH1:FH2 domain containing protein 3
Smp_069400	12.2236	-4.77106	0.86363	-5.52443	3.30565e-08	2.85463e-07	regulator of G protein signaling 3
Smp_176310	57.0157	-4.14216	0.750017	-5.52276	3.33717e-08	2.8792e-07	nicotinic acetylcholine receptor subunit type
Smp_212240	11.3721	-5.10005	0.923497	-5.52254	3.3413e-08	2.8801e-07	hypothetical protein
Smp_019840	487.268	1.61619	0.292915	5.51762	3.43625e-08	2.95922e-07	DNA ligase 1
Smp_145320	40.0568	-3.69978	0.67061	-5.51703	3.44777e-08	2.96641e-07	solute carrier family 26
Smp_173100	56.0961	-3.03528	0.550229	-5.5164	3.46014e-08	2.97433e-07	cell adhesion molecule
Smp_066260	272.549	1.90806	0.345913	5.51602	3.46772e-08	2.9781e-07	replication factor C subunit 5
Smp_156860	100.886	-3.13876	0.569587	-5.51059	3.57638e-08	3.0686e-07	meckelin
Smp_143760	177.419	1.76098	0.319579	5.51033	3.58167e-08	3.07033e-07	DNA repair protein REV1
Smp_156150	33.7742	-3.64306	0.661158	-5.51013	3.58569e-08	3.07097e-07	small conductance calcium activated potassium
Smp_004910	886.157	-1.27697	0.232047	-5.50307	3.73239e-08	3.19368e-07	RAB14, member RAS oncogene family
Smp_137240	132.267	1.54784	0.281579	5.49701	3.86289e-08	3.29932e-07	phosphatidylserine receptor
Smp_090370	227.498	1.32952	0.241859	5.49711	3.86064e-08	3.29932e-07	nucleoporin 50 kDa
Smp_173420	320.411	2.14056	0.389503	5.49562	3.89329e-08	3.32225e-07	leucine rich repeat protein 1
Smp_205640	16.8701	-4.20546	0.76541	-5.49439	3.92063e-08	3.34253e-07	alpha(13)fucosyltransferase
Smp_154970	675.819	-2.61583	0.476195	-5.49319	3.94743e-08	3.36232e-07	hypothetical protein
Smp_119110	79.9828	-4.13314	0.752813	-5.49026	4.01349e-08	3.41548e-07	hypothetical protein
Smp_150830	24.8984	4.08648	0.74438	5.48977	4.02448e-08	3.41978e-07	EF hand calcium binding domain containing protein
Smp_176300	96.4302	-2.73504	0.498212	-5.48971	4.02585e-08	3.41978e-07	dynein heavy chain
Smp_124630	105.167	-3.32815	0.60639	-5.48847	4.05439e-08	3.44091e-07	intraflagellar transport protein 80
Smp_019100	570.348	-1.09012	0.198654	-5.48755	4.07552e-08	3.4557e-07	EH domain containing protein 1
Smp_085830	495.6	-1.25893	0.229489	-5.48581	4.11574e-08	3.48665e-07	hypothetical protein
Smp_170600	45.3056	-3.33384	0.607814	-5.48496	4.13554e-08	3.50025e-07	hypothetical protein
Smp_167450	38.7559	-4.83378	0.882243	-5.47896	4.27828e-08	3.61779e-07	acid sensing ion channel 4 pituitary
Smp_162980	59.9655	-3.31189	0.604873	-5.47535	4.3665e-08	3.68906e-07	rhodopsin orphan GPCR
Smp_146080	52.5832	-3.64522	0.666054	-5.47286	4.42835e-08	3.73794e-07	hypothetical protein
Smp_169680	22.1024	-4.35107	0.795051	-5.47269	4.43256e-08	3.73813e-07	g protein coupled receptor
Smp_171300	2071.12	-1.76844	0.32317	-5.47219	4.44514e-08	3.7431e-07	ATPase, H+ transporting, lysosomal accessory
Smp_139100	272.619	-3.71539	0.678966	-5.47214	4.44646e-08	3.7431e-07	hypothetical protein
Smp_157290	192.565	1.94621	0.355732	5.471	4.47491e-08	3.76367e-07	Condensin complex subunit 2
Smp_074390	231.174	2.56276	0.468476	5.47041	4.48995e-08	3.77293e-07	eukaryotic translation initiation factor
Smp_148900	151.109	-3.91801	0.716414	-5.46892	4.52775e-08	3.80128e-07	hypothetical protein
Smp_125280	36.8943	-3.65983	0.669426	-5.46712	4.57415e-08	3.8368e-07	F box only protein 16
Smp_000780	48.0229	-3.53693	0.647143	-5.46545	4.61724e-08	3.86947e-07	#N/A
Smp_152180	245.673	-2.62148	0.479781	-5.4639	4.65787e-08	3.90003e-07	fad NAD binding oxidoreductases
Smp_034660	75.2122	-3.99209	0.731371	-5.45837	4.80536e-08	4.01992e-07	IQ motif and SEC7 domain containing protein 1
Smp_159340	132.374	-1.55797	0.285463	-5.45768	4.82387e-08	4.03181e-07	Dynein intermediate chain
Smp_021390	47.2035	-3.22318	0.59082	-5.45544	4.88526e-08	4.07948e-07	IQ domain containing protein E
Smp_160190	254.123	2.23571	0.410027	5.45259	4.96406e-08	4.14158e-07	primase, DNA, polypeptide 1 (49 kDa)
Smp_075140	81.6502	-3.23604	0.593905	-5.44875	5.0725e-08	4.22829e-07	mitochondria eating protein
Smp_106130	1450.34	0.752049	0.138046	5.44783	5.09889e-08	4.24651e-07	stress 70 protein, mitochondrial
Smp_143910	37.9239	-4.03646	0.741178	-5.44601	5.15112e-08	4.28619e-07	coiled coil and C2 domain containing protein 2A
Smp_180430	29.3056	-3.01775	0.554231	-5.44493	5.18259e-08	4.30855e-07	hypothetical protein
Smp_199770	168.029	-2.50702	0.460532	-5.44375	5.21691e-08	4.33323e-07	schwannomin interacting protein
Smp_063680	34.2203	-4.819	0.885274	-5.44352	5.22388e-08	4.33517e-07	hypothetical protein
Smp_035220	55.4867	-3.49885	0.643031	-5.44118	5.29289e-08	4.38855e-07	kinesin protein kif3b
Smp_159920	40.8979	-3.51668	0.646351	-5.44083	5.30339e-08	4.39336e-07	protocadherin 11
Smp_104120	29.6796	-2.80189	0.515016	-5.4404	5.31608e-08	4.39609e-07	hypothetical protein
Smp_149010	32.7227	-4.53753	0.834026	-5.44052	5.31262e-08	4.39609e-07	protocadherin gamma b
Smp_175310	48.2103	-3.78661	0.696363	-5.43769	5.39753e-08	4.45951e-07	hypothetical protein
Smp_126140	27.186	-5.0903	0.936468	-5.43563	5.46019e-08	4.5073e-07	integrin alpha 5
Smp_173790	426.959	-1.50937	0.27786	-5.43214	5.56808e-08	4.59232e-07	o acyltransferase (membrane bound) domain
Smp_151830	24.0328	-4.59786	0.846476	-5.43176	5.57998e-08	4.59808e-07	Choline transporter protein 1
Smp_033600	387.596	1.26828	0.233595	5.42938	5.65491e-08	4.65573e-07	Dicer 2
Smp_130560	38.6331	-4.06627	0.74896	-5.42922	5.66002e-08	4.65584e-07	receptor type tyrosine protein phosphatase F
Smp_019950	241.563	-1.73979	0.320533	-5.42782	5.70463e-08	4.68841e-07	protein phosphatase 1 inhibitor potentiated by
Smp_168870	195.052	-3.1638	0.583448	-5.4226	5.8739e-08	4.8233e-07	Rootletin
Smp_126640	18.8286	-3.98589	0.735851	-5.41671	6.07067e-08	4.9805e-07	neurotracting:lsamp:neurotrimin:obcam
Smp_166440	11.6634	-5.46791	1.01136	-5.40647	6.42774e-08	5.26883e-07	cadherin
Smp_200060	148.834	-1.4657	0.271203	-5.40444	6.50115e-08	5.31797e-07	hypothetical protein
Smp_128110	39.1048	-2.93439	0.542969	-5.40434	6.50472e-08	5.31797e-07	aquaporin 1
Smp_150790	35.7919	-3.4885	0.645464	-5.40464	6.49381e-08	5.31797e-07	hypothetical protein
Smp_178800	81.0329	2.53634	0.469338	5.40408	6.51421e-08	5.32107e-07	rest corepressor (corest) protein
Smp_143010	44.4762	-3.9418	0.729495	-5.40347	6.5364e-08	5.33455e-07	nephrocystin 1
Smp_063930	34.4804	-4.65271	0.861176	-5.40274	6.56311e-08	5.35168e-07	voltage gated potassium channel
Smp_176080	3247.55	-1.17308	0.217139	-5.40244	6.57408e-08	5.35596e-07	DIF 8
Smp_196250	115.42	-3.22015	0.596413	-5.39919	6.69419e-08	5.44907e-07	supervillin
Smp_058450	261.372	-2.95471	0.547491	-5.39681	6.78347e-08	5.51695e-07	protein phosphatase 1 regulatory subunit
Smp_212410	39.6756	-4.09162	0.758214	-5.39639	6.79939e-08	5.52509e-07	hyperpolarization activated cyclic
Smp_129230	51.9799	-4.25721	0.78901	-5.39563	6.82837e-08	5.54383e-07	trypsin-like serine protease
Smp_135190	196.351	-3.68918	0.683925	-5.39413	6.88556e-08	5.58542e-07	FERM RhoGEF and pleckstrin domain containing protein
Smp_130050	94.2189	-2.9663	0.55061	-5.38729	7.15269e-08	5.79708e-07	PDZ domain containing RING finger protein
Smp_016890	288.922	1.1718	0.217543	5.38655	7.18241e-08	5.81613e-07	hypothetical protein
Smp_124310	57.606	1.96082	0.364064	5.38594	7.2068e-08	5.83084e-07	5' AMP activated protein kinase subunit beta 2
Smp_169450	37.174	-3.08432	0.57304	-5.38238	7.35086e-08	5.94226e-07	histone H3
Smp_164340	51.9732	-3.38854	0.629678	-5.38138	7.39171e-08	5.97013e-07	Afadin
Smp_127450	95.1683	-3.86009	0.71762	-5.37902	7.48934e-08	6.04377e-07	hypothetical protein
Smp_142860	11.0302	-4.7462	0.882647	-5.37723	7.56397e-08	6.09874e-07	alpha 1,3 fucosyltransferase F
Smp_088800	297.772	1.43399	0.266804	5.3747	7.67095e-08	6.17967e-07	aspartyl tRNA synthetase
Smp_012580	48.9096	-2.81257	0.523387	-5.37379	7.70988e-08	6.20569e-07	hypothetical protein
Smp_157870	37.6276	-4.50975	0.839254	-5.37352	7.72123e-08	6.20949e-07	hypothetical protein
Smp_102750	47.2335	-2.49074	0.463566	-5.37299	7.74421e-08	6.22262e-07	Zinc finger MYND domain containing protein 12
Smp_038930	527.678	1.15942	0.215797	5.37275	7.75454e-08	6.22558e-07	pre rRNA processing protein TSR1
Smp_176730	17.3543	-4.89637	0.911464	-5.37198	7.78758e-08	6.24674e-07	Cys loop ligand gated ion channel subunit
Smp_023710	26.3354	-4.50845	0.839452	-5.3707	7.84303e-08	6.28584e-07	G protein coupled receptor fragment
Smp_058680	451.045	1.7934	0.334242	5.36559	8.06831e-08	6.46086e-07	ribosome biogenesis regulatory protein
Smp_133820	333.355	1.49536	0.278723	5.36504	8.09295e-08	6.47505e-07	peptidylprolyl isomerase domain and WD
Smp_068680	52.2272	-4.76639	0.888611	-5.36386	8.14628e-08	6.51215e-07	secreted frizzled protein
Smp_133350	717.79	1.9466	0.362943	5.36337	8.16849e-08	6.52149e-07	nucleolar gtp binding protein
Smp_194870	20.5485	-4.93059	0.919321	-5.36329	8.17189e-08	6.52149e-07	histone H4
Smp_210200	49.645	-2.35333	0.438995	-5.36071	8.2897e-08	6.60987e-07	tubulin polyglutamylase ttll9
Smp_155450	61.621	-3.6512	0.681243	-5.35961	8.33997e-08	6.64429e-07	SH3 and multiple ankyrin repeat domains protein
Smp_123790	28.0018	-3.59806	0.671556	-5.3578	8.42436e-08	6.70582e-07	glypican
Smp_149130	166.165	-3.63345	0.678799	-5.35276	8.66238e-08	6.88358e-07	fimbrin:plastin
Smp_151740	145.992	-4.17489	0.77995	-5.35277	8.66185e-08	6.88358e-07	run and tbc1 domain containing protein
Smp_136270	224.962	1.99867	0.373652	5.34902	8.84339e-08	7.01551e-07	2 oxoglutarate and iron dependent oxygenase
Smp_081250	28.6211	-4.75296	0.888566	-5.34902	8.84317e-08	7.01551e-07	potassium voltage gated channel subfamily A
Smp_174350	25.7388	-4.15793	0.778084	-5.34381	9.10111e-08	7.21384e-07	frizzled 4
Smp_214000	183.969	-1.8274	0.342178	-5.3405	9.26881e-08	7.34055e-07	serine/threonine-protein phosphatase
Smp_042440	89.3249	-2.77904	0.520537	-5.3388	9.35661e-08	7.40383e-07	LAG1 longevity assurance 4
Smp_091730	956.807	-1.53523	0.287588	-5.33829	9.38284e-08	7.41831e-07	sorting nexin
Smp_018930	160.252	3.04754	0.570917	5.33797	9.39919e-08	7.42496e-07	hypothetical protein
Smp_168270	78.455	-3.47877	0.652152	-5.3343	9.59163e-08	7.57059e-07	thioredoxin domain containing protein 3
Smp_213740	30.6685	-4.6425	0.87127	-5.32843	9.90638e-08	7.81244e-07	hypothetical protein
Smp_172740	57.1558	-3.46662	0.650818	-5.32655	1.00096e-07	7.88717e-07	Ras GTPase domain containing protein
Smp_176820	56.7309	-3.48419	0.655152	-5.31814	1.04832e-07	8.25343e-07	hypothetical protein
Smp_068920	703.967	2.13156	0.400967	5.31605	1.06046e-07	8.34198e-07	centromere:microtubule binding protein cbf5
Smp_187860	14.6521	-3.83426	0.721451	-5.31466	1.0686e-07	8.39893e-07	#N/A
Smp_197530	69.528	3.995	0.752029	5.31229	1.08254e-07	8.50054e-07	hypothetical protein
Smp_135420	30.541	-3.1318	0.589562	-5.31208	1.08379e-07	8.50054e-07	hypothetical protein
Smp_182770	458.181	-3.52937	0.664413	-5.31201	1.08425e-07	8.50054e-07	hypothetical protein
Smp_140990	38.1357	-3.8505	0.724945	-5.31143	1.08766e-07	8.52019e-07	hypothetical protein
Smp_033760	498.403	1.01854	0.191802	5.31036	1.09408e-07	8.56326e-07	hypothetical protein
Smp_018940	29.7613	-2.9139	0.54897	-5.30793	1.10878e-07	8.67112e-07	calmodulin
Smp_057950	200.686	-1.22379	0.230699	-5.30468	1.12872e-07	8.81356e-07	hypothetical protein
Smp_007670	39.7545	-4.23115	0.79763	-5.30465	1.12888e-07	8.81356e-07	hypothetical protein
Smp_035090	351.627	2.22726	0.420345	5.29864	1.16666e-07	9.1009e-07	hepatoma up regulated protein
Smp_022170	456.056	-1.16261	0.219558	-5.29524	1.18863e-07	9.26459e-07	tropomyosin
Smp_193330	7.30772	5.67814	1.073	5.29183	1.211e-07	9.43111e-07	kinesin II 85 kDa subunit
Smp_042300	1907.73	-1.88792	0.356928	-5.28936	1.22745e-07	9.55126e-07	PUR alpha protein
Smp_209040	470.557	-1.58382	0.299472	-5.28872	1.23173e-07	9.5766e-07	long chain fatty acid coenzyme A ligase
Smp_161180	27.4924	-3.80892	0.720685	-5.28513	1.25613e-07	9.75817e-07	hypothetical protein
Smp_147000	274.883	-1.75868	0.332917	-5.28266	1.27325e-07	9.88299e-07	syntenin 2
Smp_137560	25.3558	-3.73155	0.706711	-5.28017	1.29065e-07	1.00097e-06	dynein heavy chain
Smp_012980	370.713	1.33671	0.25361	5.27075	1.35868e-07	1.05287e-06	eukaryotic translation initiation factor 3
Smp_137780	47.7056	2.4672	0.469124	5.25916	1.44713e-07	1.12048e-06	sister chromatid cohesion protein PDS5
Smp_045730	438.315	1.68352	0.320155	5.25844	1.45285e-07	1.12398e-06	exosome complex RNA binding protein Rrp42
Smp_013630	24.8845	-4.4215	0.841173	-5.25635	1.4694e-07	1.13584e-06	cadherin
Smp_210940	118.043	1.81657	0.345646	5.25559	1.4755e-07	1.13962e-06	dna polymerase epsilon catalytic subunit a
Smp_161360	116.651	-2.29799	0.437329	-5.25461	1.48338e-07	1.14476e-06	syndecan
Smp_040970	1820.13	-1.24432	0.236947	-5.25146	1.50901e-07	1.16358e-06	vacuolar proton atpases
Smp_124210	12.8786	-5.04507	0.960747	-5.25119	1.51116e-07	1.16428e-06	ephrin type A receptor 4 A
Smp_052730	36.8026	-2.64155	0.503712	-5.24417	1.56989e-07	1.20853e-06	sperm associated antigen 1
Smp_117810	116.892	-1.81707	0.346516	-5.24383	1.57277e-07	1.20975e-06	v type proton atpase subunit h
Smp_174550	41.9717	-3.31839	0.633797	-5.23573	1.64331e-07	1.26297e-06	hypothetical protein
Smp_196300	42.0619	-3.21286	0.61483	-5.22561	1.73581e-07	1.33297e-06	FERM, RhoGEF and pleckstrin domain containing protein
Smp_149450	281.634	1.29255	0.247366	5.22524	1.73927e-07	1.33453e-06	tRNA dihydrouridine synthase 2
Smp_137310	15.1794	-5.36107	1.02612	-5.2246	1.74527e-07	1.33804e-06	amine GPCR
Smp_161500	37.372	-3.66196	0.701846	-5.2176	1.81254e-07	1.38848e-06	rhodopsin orphan GPCR
Smp_003770	3683.2	1.36871	0.26237	5.21672	1.8212e-07	1.39397e-06	histone H1
Smp_133660	86.6758	4.39096	0.841791	5.21621	1.82618e-07	1.39664e-06	protein lin 9
Smp_137160	179.107	1.73832	0.333483	5.21262	1.86189e-07	1.42279e-06	calcium binding mitochondrial carrier protein
Smp_172010	6.02745	5.4989	1.05566	5.20896	1.899e-07	1.44996e-06	caspase 7 (C14 family)
Smp_096520	61.3824	-2.60274	0.499788	-5.20769	1.91202e-07	1.45871e-06	sialin
Smp_175980	44.8594	-3.54094	0.679968	-5.20751	1.91393e-07	1.45898e-06	mitochondrial sodium:hydrogen exchanger NHA2
Smp_096360	333.622	1.78441	0.34283	5.20493	1.94066e-07	1.47815e-06	replication factor C subunit 4
Smp_046640	12.7929	-5.32533	1.02339	-5.20363	1.95437e-07	1.48739e-06	twik family of potassium channels
Smp_022810	385.526	-1.16041	0.223087	-5.20159	1.97586e-07	1.50252e-06	ras protein Rab 2B
Smp_099680	6.88095	-5.34369	1.02781	-5.19909	2.00264e-07	1.52165e-06	hypothetical protein
Smp_175720	40.0962	-4.28632	0.825528	-5.19221	2.0781e-07	1.5777e-06	E3 ubiquitin protein ligase TRIM9
Smp_135140	22.047	-4.37535	0.842917	-5.19072	2.09479e-07	1.58909e-06	high voltage-activated calcium channel beta subunit 1
Smp_180750	8.82451	-5.20445	1.00284	-5.18969	2.10639e-07	1.59659e-06	hypothetical protein
Smp_127220	20.649	-3.96446	0.764023	-5.18892	2.11512e-07	1.60191e-06	hypothetical protein
Smp_195190	222.045	4.08769	0.787982	5.18754	2.13095e-07	1.61204e-06	13 kDa tegumental antigen Sm13
Smp_025620	77.6959	-2.47793	0.477678	-5.18745	2.13193e-07	1.61204e-06	coiled coil domain containing protein 151
Smp_152300	110.793	-1.66008	0.320174	-5.18492	2.16103e-07	1.63272e-06	hypothetical protein
Smp_135500	105.152	-3.35982	0.648838	-5.17821	2.24022e-07	1.69118e-06	cGMP dependent 3',5' cyclic phosphodiesterase
Smp_147950	604.6	1.22687	0.23713	5.17383	2.29345e-07	1.72997e-06	bromodomain containing 2
Smp_147860	17.2267	-5.33507	1.03135	-5.17288	2.30508e-07	1.73734e-06	transient receptor potential ion channel A
Smp_124280	72.0375	3.84943	0.744675	5.16928	2.34998e-07	1.76976e-06	hypothetical protein
Smp_152670	190.191	2.54342	0.492171	5.16776	2.36915e-07	1.78276e-06	crossover junction endonuclease EME1
Smp_210780	467.909	-1.20709	0.233628	-5.16672	2.38234e-07	1.78982e-06	Loss of heterozygosity 11 chromosomal region 2
Smp_129460	28.0844	-4.51922	0.874653	-5.16687	2.38052e-07	1.78982e-06	hypothetical protein
Smp_076860	166.435	-2.65119	0.513201	-5.16598	2.39189e-07	1.79554e-06	B9 domain containing protein 2
Smp_004640	259.353	1.18152	0.228731	5.16554	2.3975e-07	1.79831e-06	DNA directed RNA polymerases I and III subunit
Smp_155990	41.5266	-3.89922	0.754925	-5.16503	2.40395e-07	1.80171e-06	guanine nucleotide exchange factor
Smp_147830	35.0644	-3.96696	0.768495	-5.16199	2.44334e-07	1.82977e-06	cadherin
Smp_138430	356.955	-2.43941	0.472814	-5.15934	2.47827e-07	1.85444e-06	regulator of G protein signaling
Smp_147230	62	2.56965	0.498105	5.15884	2.4848e-07	1.85785e-06	ATP dependent DNA helicase PIF1
Smp_168800	236.778	1.51944	0.29466	5.15658	2.51504e-07	1.87896e-06	family C12 unassigned peptidase (C12 family)
Smp_204260	243.028	-2.62719	0.510582	-5.14547	2.66846e-07	1.99198e-06	hypothetical protein
Smp_148200	74.4938	-4.09155	0.795451	-5.14369	2.6939e-07	2.00937e-06	junctophilin 2
Smp_142420	22.1863	-4.68078	0.910365	-5.14165	2.72336e-07	2.02972e-06	hypothetical protein
Smp_178810	1126.17	1.03	0.20034	5.14125	2.72918e-07	2.03245e-06	26S proteasome non ATPase regulatory subunit
Smp_018870	155.769	-2.54949	0.49593	-5.14083	2.73532e-07	2.0354e-06	hypothetical protein
Smp_010230	133.575	-1.86267	0.36239	-5.13996	2.74793e-07	2.04316e-06	guanine nucleotide binding protein beta 1 4
Smp_154500	77.1215	-2.47123	0.481252	-5.135	2.82138e-07	2.0961e-06	hypothetical protein
Smp_171680	48.1503	-2.80198	0.5457	-5.13466	2.82657e-07	2.0983e-06	protein sidekick
Smp_133520	29.0285	-4.20499	0.819306	-5.13238	2.86106e-07	2.12222e-06	forkhead box protein j1
Smp_009710	509.888	1.0712	0.208788	5.13054	2.88915e-07	2.14136e-06	general transcription factor 3C polypeptide 3
Smp_010450	13.0136	-3.63154	0.708167	-5.12809	2.927e-07	2.16769e-06	hypothetical protein
Smp_079950	2009.56	-1.64076	0.320113	-5.12556	2.9666e-07	2.19371e-06	vacuolar h atpase
Smp_155280	63.2785	-2.85696	0.557396	-5.12554	2.96682e-07	2.19371e-06	sperm surface protein Sp17
Smp_129790	14.3181	-5.08959	0.993098	-5.12496	2.97599e-07	2.19875e-06	synaptotagmin 3
Smp_052630	72.5239	-4.1186	0.803727	-5.12438	2.98516e-07	2.20252e-06	amiloride sensitive sodium channel
Smp_160180	52.6984	-4.14706	0.809287	-5.12434	2.9858e-07	2.20252e-06	hypothetical protein
Smp_212450	39.1795	-2.71824	0.530819	-5.12084	3.04178e-07	2.24206e-06	placental protein 11
Smp_213850	399.251	1.0736	0.209688	5.12001	3.05513e-07	2.25013e-06	hypothetical protein
Smp_104960	436.757	-0.860343	0.168065	-5.1191	3.06998e-07	2.25929e-06	syntaxin 6
Smp_190720	50.8821	1.57773	0.308459	5.11487	3.13963e-07	2.30872e-06	#N/A
Smp_194080	177.901	-1.73128	0.338517	-5.11431	3.14893e-07	2.31375e-06	DNAj subfamily C member
Smp_153030	54.4933	-3.98066	0.778787	-5.11136	3.19848e-07	2.34831e-06	solute carrier family 35 member f4
Smp_125210	16.6561	-5.39443	1.05595	-5.10861	3.2454e-07	2.38089e-06	Aquaporin 9 (AQP 9) (Small solute channel 1)
Smp_105200	205.342	1.60296	0.313904	5.10654	3.28108e-07	2.40519e-06	glypican 4
Smp_130890	67.9407	-2.5809	0.505719	-5.10342	3.33572e-07	2.44333e-06	transient receptor potential cation channel
Smp_079860	1091.7	1.14232	0.223977	5.10019	3.39311e-07	2.48341e-06	o acyltransferase (membrane bound) domain
Smp_006760	35.2765	3.12979	0.613958	5.09773	3.43756e-07	2.51398e-06	fasting inducible integral membrane protein
Smp_205690	11.8804	3.85896	0.757065	5.09726	3.44598e-07	2.51817e-06	hypothetical protein
Smp_123050	37.0204	-4.43381	0.87009	-5.09581	3.47261e-07	2.53565e-06	Regulator of G protein signaling 20
Smp_161530	198.032	2.00001	0.392736	5.09251	3.5336e-07	2.57818e-06	myocyte specific enhancer factor 2a
Smp_054770	59.9367	3.06538	0.601976	5.0922	3.5394e-07	2.5804e-06	hypothetical protein
Smp_148530	2479.96	1.86866	0.366986	5.09192	3.54463e-07	2.5822e-06	major egg antigen
Smp_170550	2020.59	-1.04981	0.206213	-5.09093	3.56314e-07	2.59367e-06	granulin
Smp_145150	14.7622	-4.37944	0.860878	-5.08718	3.63432e-07	2.64342e-06	hypothetical protein
Smp_013950	112.857	-2.27097	0.446584	-5.0852	3.67238e-07	2.66903e-06	solute carrier family 43
Smp_022400	1395.87	-0.878783	0.172839	-5.0844	3.68781e-07	2.67817e-06	glucose 6 phosphate isomerase
Smp_022990	405.206	-0.820266	0.161354	-5.08365	3.70259e-07	2.68682e-06	Voltage dependent anion selective channel
Smp_084380	501.479	1.45843	0.287058	5.08062	3.76203e-07	2.72783e-06	Cleavage and polyadenylation specificity factor
Smp_133170	54.8342	-2.97692	0.586497	-5.07576	3.8595e-07	2.79634e-06	vasohibin protein
Smp_035280	413.097	1.56846	0.309058	5.07497	3.8756e-07	2.80584e-06	hypothetical protein
Smp_101890	98.1544	2.43791	0.480826	5.07026	3.9727e-07	2.87391e-06	hypothetical protein
Smp_156500	67.6937	-3.41567	0.674689	-5.06259	4.13599e-07	2.98973e-06	rap guanine nucleotide exchange factor 1
Smp_140570	14.3276	-3.90173	0.770749	-5.06225	4.14336e-07	2.99274e-06	stAR lipid transfer protein 9
Smp_165470	58.6112	4.09353	0.808938	5.06038	4.18432e-07	3.02e-06	epidermal growth factor receptor
Smp_124410	90.8135	-2.52035	0.498145	-5.05947	4.2042e-07	3.03201e-06	fatty acid amide hydrolase
Smp_129450	207.108	-1.46218	0.289094	-5.05781	4.24096e-07	3.05558e-06	glucose 6 phosphatase 3
Smp_129610	31.0665	-2.93668	0.580651	-5.05755	4.24667e-07	3.05558e-06	malate dehydrogenase
Smp_014680	36.6585	-3.95706	0.782392	-5.05764	4.24471e-07	3.05558e-06	coiled coil domain containing 96
Smp_008610	34.0878	3.5692	0.705935	5.05599	4.28157e-07	3.07833e-06	deoxyribonuclease ii
Smp_029500	787.192	0.945145	0.186981	5.05478	4.30893e-07	3.09562e-06	thimet oligopeptidase
Smp_127070	113.043	2.8779	0.569544	5.053	4.34922e-07	3.12216e-06	origin recognition complex subunit
Smp_123300	63.1904	-3.90991	0.773855	-5.05251	4.3605e-07	3.12787e-06	follistatin
Smp_123780	30.0693	-3.7726	0.747027	-5.05015	4.41458e-07	3.16423e-06	glypican 5
Smp_042390	320.777	1.55608	0.308214	5.04872	4.44785e-07	3.18564e-06	haloacid dehalogenase hydrolase
Smp_175610	384.409	0.965093	0.191169	5.04838	4.45576e-07	3.18887e-06	dihydrolipoamide acetyltransferase component of
Smp_146160	111.567	2.74352	0.543534	5.04757	4.47474e-07	3.19814e-06	Fanconi anemia group D2 protein
Smp_006250	364.431	0.915664	0.181408	5.04753	4.47555e-07	3.19814e-06	polycomb protein SCMH1
Smp_143800	19.7174	-4.20794	0.834377	-5.04322	4.57773e-07	3.26866e-06	sodium:chloride dependent neurotransmitter
Smp_014780	645.746	2.34233	0.464651	5.04106	4.62961e-07	3.30319e-06	alpha actinin, sarcomeric
Smp_138290	63.1325	-3.65682	0.725568	-5.03994	4.65677e-07	3.32003e-06	hypothetical protein
Smp_053130	2376.93	1.61802	0.321117	5.03874	4.68614e-07	3.33843e-06	40S ribosomal protein S6
Smp_149470	24.8383	-4.12165	0.81805	-5.03838	4.69483e-07	3.34208e-06	#N/A
Smp_127490	119.742	2.36921	0.470441	5.03615	4.74982e-07	3.37865e-06	blooms syndrome DNA helicase
Smp_018550	1023.28	-1.22432	0.243188	-5.03444	4.79243e-07	3.40637e-06	hypothetical protein
Smp_194740	82.413	-4.24572	0.844506	-5.02746	4.97025e-07	3.53008e-06	G protein coupled receptor fragment
Smp_140530	222.979	2.39868	0.477132	5.0273	4.97431e-07	3.53029e-06	replication factor c subunit 2
Smp_137910	91.8226	-3.79119	0.754322	-5.02596	5.00921e-07	3.55237e-06	tight junction protein 3 (zona occludens 3)
Smp_155290	24.6694	-3.31404	0.659465	-5.02535	5.0252e-07	3.561e-06	glutamic acid rich protein cNBL1500
Smp_014270	28.5312	2.76716	0.550738	5.02446	5.04861e-07	3.57489e-06	hypothetical protein
Smp_026810	16.4515	-3.90008	0.776753	-5.02101	5.14008e-07	3.63691e-06	lysosome membrane protein 2
Smp_169510	64.7723	3.33866	0.664991	5.0206	5.15101e-07	3.64189e-06	PI3kinase
Smp_098950	475.619	0.923368	0.183936	5.02005	5.16589e-07	3.6469e-06	tata box binding protein
Smp_125990	42.816	-3.30796	0.658945	-5.02008	5.165e-07	3.6469e-06	hypothetical protein
Smp_157310	25.7799	-3.40802	0.679017	-5.01905	5.19277e-07	3.66311e-06	PDZ and LIM domain protein 7
Smp_168960	54.8941	-3.40738	0.678995	-5.01827	5.21391e-07	3.67526e-06	multiple pdz domain protein
Smp_041570	25.5873	-3.50037	0.697652	-5.01736	5.23867e-07	3.68993e-06	hypothetical protein
Smp_171710	337.296	2.85317	0.568979	5.01454	5.31616e-07	3.7417e-06	structural maintenance of chromosomes protein 2
Smp_172260	10.82	-5.20752	1.03914	-5.01138	5.40401e-07	3.80067e-06	hypothetical protein
Smp_194420	21.3776	-4.45349	0.889484	-5.00683	5.53346e-07	3.8888e-06	hypothetical protein
Smp_174190	70.7364	-3.75568	0.750331	-5.00537	5.57559e-07	3.91546e-06	Tetraspanin 18 (Tspan 18)
Smp_024380	165.769	1.26853	0.253529	5.00347	5.63073e-07	3.95122e-06	hypothetical protein
Smp_092930	241.767	1.75553	0.350921	5.00263	5.65524e-07	3.96545e-06	hypothetical protein
Smp_072980	754.401	1.25796	0.251488	5.00207	5.67171e-07	3.97402e-06	eukaryotic elongation factor 2 kinase
Smp_029480	57.6409	-2.56255	0.512819	-4.99699	5.82318e-07	4.07405e-06	Bardet Biedl syndrome 4 protein
Smp_151440	427.909	-3.26672	0.653729	-4.99706	5.82102e-07	4.07405e-06	hypothetical protein
Smp_144590	208.17	-2.44277	0.488866	-4.99682	5.82844e-07	4.07469e-06	ras gtpase activating protein
Smp_136150	20.3385	-3.83062	0.766662	-4.99649	5.83836e-07	4.07857e-06	hypothetical protein
Smp_141900	138.977	-3.31941	0.664869	-4.99257	5.95808e-07	4.15911e-06	centrosomal protein of 290 kDa
Smp_140670	44.6727	-3.95777	0.793093	-4.9903	6.02843e-07	4.20508e-06	centrosomal protein of 135 kda
Smp_031360	755.98	1.10956	0.222499	4.98682	6.13818e-07	4.27845e-06	nuclear cap binding protein subunit 1
Smp_151490	46.7576	2.94297	0.590295	4.98559	6.1773e-07	4.3025e-06	protein vertebrate nebulin
Smp_166030	1078.25	-2.65814	0.533415	-4.98324	6.25272e-07	4.3518e-06	erythrocyte membrane protein
Smp_083410	3214.37	1.77488	0.356261	4.98195	6.29478e-07	4.37782e-06	eukaryotic translation elongation factor 1
Smp_133550	136.731	-3.81498	0.766473	-4.97731	6.4473e-07	4.48057e-06	neuropeptide receptor type
Smp_128250	31.6122	-3.56352	0.716116	-4.97618	6.48526e-07	4.5036e-06	hypothetical protein
Smp_172970	82.7667	1.51879	0.305263	4.97533	6.51354e-07	4.51988e-06	hypothetical protein
Smp_131240	8.77219	-4.80942	0.966919	-4.97396	6.55977e-07	4.54859e-06	transcription factor
Smp_000820	455.124	-1.84067	0.370235	-4.97162	6.63945e-07	4.60043e-06	hypothetical protein
Smp_163660	74.5211	-4.09702	0.824591	-4.96855	6.74555e-07	4.6705e-06	adenylate kinase 7
Smp_174770	30.0887	-3.10677	0.62556	-4.96638	6.82128e-07	4.71944e-06	coiled coil domain containing protein 146
Smp_142870	11.4374	-4.90992	0.988864	-4.96522	6.86246e-07	4.74442e-06	hypothetical protein
Smp_172070	654.614	-2.1547	0.433987	-4.9649	6.87359e-07	4.74861e-06	hypothetical protein
Smp_132780	5.72852	5.41027	1.09037	4.96185	6.98252e-07	4.82031e-06	hypothetical protein
Smp_174380	87.6272	-3.07631	0.62036	-4.95891	7.08896e-07	4.89018e-06	F box:LRR repeat protein 16
Smp_020760	413.262	-1.07217	0.216219	-4.95872	7.09585e-07	4.89133e-06	ankyrin repeat containing
Smp_196010	371.115	-1.84536	0.372197	-4.95802	7.12137e-07	4.90531e-06	stomatin (EPB72) 1
Smp_169890	25.1958	-4.42814	0.893192	-4.95766	7.13484e-07	4.91097e-06	hypothetical protein
Smp_124740	87.7176	-3.53579	0.713374	-4.95643	7.17999e-07	4.93842e-06	hypothetical protein
Smp_125510	109.761	-4.26355	0.860253	-4.95616	7.19011e-07	4.94175e-06	cadherin
Smp_157020	38.8603	-3.41185	0.68887	-4.95282	7.31455e-07	5.02359e-06	titin
Smp_147890	20.29	-3.89363	0.786188	-4.95255	7.32478e-07	5.02692e-06	Rootletin
Smp_148490	48.8214	-4.31536	0.871396	-4.95224	7.33652e-07	5.03129e-06	kazrin
Smp_200090	156.189	-2.25854	0.45612	-4.95164	7.35914e-07	5.04311e-06	hypothetical protein
Smp_143220	88.4297	-3.53409	0.714116	-4.94889	7.4637e-07	5.11102e-06	hypothetical protein
Smp_163820	250.64	-3.04202	0.614812	-4.94789	7.5021e-07	5.13356e-06	phospholipid transporting ATPase IF
Smp_205720	15.4138	-4.15499	0.839997	-4.94643	7.55856e-07	5.16842e-06	universal stress protein in QAH:OAS
Smp_070860	58.9065	-2.02064	0.408974	-4.94075	7.78222e-07	5.31747e-06	malate dehydrogenase 1b
Smp_139370	12.7972	-4.77978	0.96882	-4.93361	8.07244e-07	5.51175e-06	hypothetical protein
Smp_197640	62.8774	-3.83428	0.77729	-4.93288	8.10272e-07	5.5284e-06	sodium leak channel non selective protein
Smp_181530	767.511	3.37086	0.683849	4.92925	8.25467e-07	5.62796e-06	cd63 antigen
Smp_175070	194.571	1.99646	0.405167	4.92749	8.32913e-07	5.6746e-06	nAChR subunit (ShAR1 beta2)
Smp_141500	218.347	4.01694	0.815466	4.92595	8.39527e-07	5.7155e-06	hypothetical protein
Smp_132970	53.6147	-3.05202	0.619659	-4.92533	8.42202e-07	5.72955e-06	coiled coil domain containing protein 113
Smp_122750	9.57982	-4.70385	0.955617	-4.92232	8.55247e-07	5.81406e-06	Crumbs complex protein
Smp_150180	23.7216	-3.52377	0.71592	-4.92201	8.56582e-07	5.81891e-06	octopamine receptor oamb
Smp_152500	11.0545	-4.36771	0.887755	-4.91995	8.65668e-07	5.87638e-06	cyclic nucleotide gated cation channel
Smp_024070	11.2806	-4.32204	0.878834	-4.91792	8.74679e-07	5.93324e-06	FERM, RhoGEF and pleckstrin domain containing protein
Smp_152680	111.794	-3.61096	0.734458	-4.91649	8.81077e-07	5.97231e-06	epidermal growth factor receptor
Smp_138650	11.4801	3.32054	0.67544	4.91611	8.82817e-07	5.97545e-06	hypothetical protein
Smp_171010	74.1905	-2.67421	0.543966	-4.91613	8.82711e-07	5.97545e-06	EF hand domain (C terminal) containing 2
Smp_127750	121.901	1.87507	0.381434	4.91584	8.84027e-07	5.97932e-06	kelch domain containing protein 9
Smp_104980	401.162	1.95015	0.397222	4.90947	9.13212e-07	6.17226e-06	G2:M phase specific E3 ubiquitin protein ligase
Smp_046910	80.7442	2.61772	0.533309	4.90845	9.17974e-07	6.19815e-06	DNA polymerase epsilon subunit 4
Smp_000030	2094.37	0.993468	0.202403	4.90837	9.18367e-07	6.19815e-06	26s proteasome regulatory particle subunit
Smp_134590	68.5175	-3.24475	0.661277	-4.9068	9.25725e-07	6.24331e-06	unc 13 (munc13)
Smp_145890	81.9497	-3.43283	0.699699	-4.90615	9.28796e-07	6.25951e-06	adamTS protein 3
Smp_139420	31.9014	-3.33959	0.680977	-4.90412	9.38453e-07	6.32004e-06	hypothetical protein
Smp_172040	58.7254	-3.4473	0.704437	-4.8937	9.8959e-07	6.65485e-06	protein unc 13 B
Smp_056560	31.5299	-3.68866	0.75375	-4.89374	9.89363e-07	6.65485e-06	cyclic nucleotide gated cation channel
Smp_000580	36.1469	-3.48846	0.712892	-4.89339	9.91116e-07	6.66033e-06	coiled coil domain containing protein 63
Smp_199790	13.6802	-4.37437	0.894077	-4.89262	9.95048e-07	6.68195e-06	alpha(13)fucosyltransferase
Smp_004070	64.2644	-2.22791	0.455446	-4.8917	9.99664e-07	6.70814e-06	carbonic anhydrase
Smp_080840	96.5165	1.53564	0.313938	4.89155	1.00046e-06	6.70865e-06	HIT finger domain protein
Smp_175020	93.6389	-3.81485	0.78056	-4.88733	1.02215e-06	6.8492e-06	hypothetical protein
Smp_091870	502.764	-2.47644	0.506909	-4.88537	1.03235e-06	6.91263e-06	hypothetical protein
Smp_151350	36.2957	-3.47707	0.711802	-4.88488	1.03494e-06	6.92501e-06	dyslexia susceptibility 1 candidate 1
Smp_141110	12.1433	-4.22463	0.864929	-4.88437	1.03761e-06	6.93792e-06	hypothetical protein
Smp_072030	33.0036	-4.02301	0.823698	-4.88408	1.03914e-06	6.94317e-06	hypothetical protein
Smp_058080	15.6578	-4.72017	0.966654	-4.883	1.04483e-06	6.97624e-06	neuropeptide Y receptor
Smp_166660	9.2591	-3.91245	0.8016	-4.8808	1.05657e-06	7.0496e-06	hypothetical protein
Smp_149280	38.5978	-3.62687	0.743264	-4.87965	1.06273e-06	7.08563e-06	kinase D interacting substrate of 220 kDa
Smp_177320	16.1098	2.78647	0.571066	4.87943	1.06395e-06	7.08871e-06	hypothetical protein
Smp_131350	18.9018	-4.4821	0.91897	-4.87731	1.07543e-06	7.16011e-06	Ileal sodium:bile acid cotransporter
Smp_094480	493.592	-1.40801	0.288943	-4.87297	1.09931e-06	7.31388e-06	guanine nucleotide binding protein subunit beta
Smp_140660	66.2652	-3.68183	0.755605	-4.87269	1.10086e-06	7.31901e-06	centrosomal protein of 135 kda
Smp_169120	40.089	1.78994	0.367557	4.86984	1.11691e-06	7.42042e-06	DNA mismatch repair protein MSH2
Smp_150380	169.739	2.90189	0.596101	4.86813	1.12661e-06	7.47957e-06	sphingomyelin synthase 1
Smp_139150	38.5238	-2.23335	0.458829	-4.86751	1.13016e-06	7.4978e-06	sodium dependent glucose transporter 1
Smp_123660	56.7437	-2.24363	0.461133	-4.86548	1.14177e-06	7.56945e-06	peroxidasin
Smp_158840	142.387	1.69579	0.348597	4.86461	1.14683e-06	7.59767e-06	digestive organ expansion factor
Smp_177000	30.5295	-3.98965	0.820481	-4.86258	1.15866e-06	7.67059e-06	transmembrane protein 132E
Smp_134260	41.2281	-3.41324	0.702403	-4.85938	1.17751e-06	7.7899e-06	mitogen activated protein kinase 15
Smp_178100	119.464	-2.0548	0.423061	-4.85699	1.19184e-06	7.8791e-06	EF hand calcium binding domain containing protein
Smp_137550	44.9305	-3.69129	0.760048	-4.85665	1.19386e-06	7.88691e-06	dynein heavy chain
Smp_155270	72.8531	-4.10448	0.846086	-4.85113	1.22758e-06	8.10393e-06	HMG-CoA synthase
Smp_144050	65.5646	-3.34996	0.69083	-4.84919	1.2397e-06	8.17815e-06	receptor type tyrosine protein phosphatase F
Smp_153350	318.616	1.71792	0.354501	4.84603	1.25956e-06	8.30331e-06	nuclear ribonuclease Z
Smp_100090	2027.45	1.62454	0.335498	4.84217	1.28431e-06	8.46052e-06	high mobility group protein B1
Smp_004350	664.779	-1.11025	0.22933	-4.84127	1.29012e-06	8.49286e-06	ubiquitin conjugating enzyme E2 L3
Smp_132640	500.285	-1.21829	0.25172	-4.83984	1.29943e-06	8.54813e-06	CDP-diacylglycerol--inositol 3-phosphatidyltransferase
Smp_124910	549.735	-3.29497	0.680832	-4.83963	1.30084e-06	8.55136e-06	protein stoned B
Smp_199340	92.7337	1.42625	0.29494	4.83573	1.32659e-06	8.71455e-06	aspartyl tRNA synthetase
Smp_000900	33.0333	-3.3886	0.700915	-4.83455	1.3345e-06	8.76034e-06	neuropeptide FF receptor 1
Smp_000480	951.439	1.11668	0.231088	4.83229	1.34968e-06	8.85382e-06	eukaryotic translation initiation factor 3
Smp_167630	68.4798	-2.59554	0.537156	-4.832	1.35165e-06	8.86053e-06	zinc transporter foi
Smp_181870	18.9129	4.20241	0.870005	4.83033	1.36308e-06	8.92921e-06	dna replication licensing factor mcm8
Smp_212330	47.9084	-1.9217	0.398184	-4.82616	1.39188e-06	9.11145e-06	DNA directed RNA polymerase III largest subunit
Smp_042420	199.672	1.55219	0.321673	4.82538	1.3974e-06	9.14118e-06	histone H4 transcription factor
Smp_084620	523.605	1.7256	0.358215	4.81723	1.45567e-06	9.51572e-06	activated rna polymerase II transcriptional
Smp_156810	20.7509	-3.60865	0.749507	-4.8147	1.47422e-06	9.63024e-06	hypothetical protein
Smp_130710	12.2233	-3.70295	0.769453	-4.81245	1.49095e-06	9.73275e-06	wd repeat containing
Smp_146600	151.768	-2.09662	0.435848	-4.81043	1.50603e-06	9.82435e-06	ras gene family, member A
Smp_005330	203.527	1.7167	0.356883	4.81027	1.50729e-06	9.8257e-06	methionine tRNA synthetase
Smp_059400	8.4487	-5.01958	1.04376	-4.80914	1.51581e-06	9.87437e-06	biogenic amine receptor
Smp_179650	1792.45	1.6961	0.352769	4.80795	1.52485e-06	9.9264e-06	chromobox protein
Smp_114180	12.7994	-5.06726	1.0543	-4.8063	1.53753e-06	1.00019e-05	hypothetical protein
Smp_161070	63.284	-2.37479	0.494174	-4.80559	1.54297e-06	1.00304e-05	hypothetical protein
Smp_162880	458.073	-1.37516	0.286222	-4.80453	1.55115e-06	1.00766e-05	neutral sphingomyelinase
Smp_167610	38.5422	2.41134	0.502217	4.80138	1.57575e-06	1.02293e-05	multidrug resistance associated protein 4
Smp_018440	20.0858	-4.69227	0.977609	-4.79974	1.58874e-06	1.03064e-05	hypothetical protein
Smp_200110	48.078	-3.67932	0.767523	-4.79376	1.63686e-06	1.06113e-05	hypothetical protein
Smp_018280	572.999	1.53317	0.31992	4.79235	1.64838e-06	1.06785e-05	polynucleotide 5' hydroxyl kinase NOL9
Smp_128270	16.5305	-3.67287	0.767669	-4.78445	1.71458e-06	1.10997e-05	hypothetical protein
Smp_136550	154.455	3.65064	0.76341	4.78201	1.73549e-06	1.12273e-05	tyrosine protein kinase transmembrane receptor
Smp_130810	34.4064	-3.84543	0.804185	-4.78177	1.73761e-06	1.12333e-05	dynein heavy chain
Smp_064530	567.088	1.11856	0.233965	4.78087	1.74538e-06	1.12757e-05	eukaryotic translation initiation factor 3
Smp_149170	37.5709	-4.17571	0.873505	-4.78041	1.74938e-06	1.12937e-05	Probable G protein coupled receptor B0563
Smp_137330	773.214	1.80246	0.37723	4.77815	1.76912e-06	1.14133e-05	serine dehydratase
Smp_153900	30.1648	-2.56684	0.537231	-4.7779	1.77139e-06	1.14201e-05	amiloride sensitive cation channel
Smp_083680	454.626	1.1273	0.235948	4.77776	1.77262e-06	1.14202e-05	hypothetical protein
Smp_175160	28.8654	-3.36743	0.705051	-4.77615	1.78679e-06	1.15035e-05	serine:threonine protein kinase PAK 3
Smp_012480	262.418	1.34935	0.282566	4.77534	1.794e-06	1.1542e-05	exonuclease 1
Smp_140650	90.5559	-2.66145	0.557711	-4.77211	1.8231e-06	1.17212e-05	hypothetical protein
Smp_003110	34.3826	-3.32597	0.697312	-4.7697	1.84496e-06	1.18536e-05	Nadrin protein
Smp_205320	6.46843	5.27288	1.10698	4.7633	1.90451e-06	1.22278e-05	hypothetical protein
Smp_138490	38.8784	-2.0656	0.433717	-4.76255	1.91158e-06	1.22648e-05	Bardet Biedl syndrome 5
Smp_132750	15.5753	-3.59236	0.754352	-4.76218	1.91517e-06	1.22794e-05	guanine nucleotide binding protein subunit
Smp_011710	490.877	0.913674	0.191922	4.76065	1.92972e-06	1.23642e-05	hypothetical protein
Smp_004120	224.843	-2.05509	0.431866	-4.75863	1.94912e-06	1.248e-05	AMP deaminase 2
Smp_125480	21.3795	-4.55897	0.958441	-4.75665	1.9683e-06	1.25942e-05	synaptopodin 2 protein like
Smp_097370	245.915	-1.46339	0.308064	-4.75026	2.03154e-06	1.29899e-05	fructose 1,6 bisphosphatase
Smp_098300	312.9	2.9576	0.622746	4.74929	2.04128e-06	1.30433e-05	hypothetical protein
Smp_062520	444.496	1.15145	0.242475	4.74875	2.04673e-06	1.30678e-05	n alpha acetyltransferase 15, NatA auxiliary
Smp_079380	28.8808	-3.29707	0.694318	-4.74864	2.04791e-06	1.30678e-05	serine palmitoyltransferase 2
Smp_133900	11.1293	-4.97018	1.04702	-4.74699	2.06468e-06	1.31658e-05	indoleamine 2,3 dioxygenase 2
Smp_132630	20.5901	-4.3549	0.917505	-4.74646	2.07004e-06	1.31911e-05	hypothetical protein
Smp_142790	25.153	-4.12729	0.869757	-4.74533	2.08162e-06	1.32558e-05	guanine nucleotide binding protein alpha
Smp_048620	293.034	1.01171	0.213223	4.74484	2.08666e-06	1.32789e-05	exosome complex component RRP45
Smp_079240	448.421	1.61425	0.340765	4.73713	2.16771e-06	1.37853e-05	dUTP pyrophosphatase
Smp_193620	7.21932	-4.38982	0.926954	-4.73574	2.18252e-06	1.387e-05	#N/A
Smp_164630	36.8973	-3.96219	0.836853	-4.73463	2.1946e-06	1.39374e-05	protein sickie
Smp_123360	23.3819	4.1804	0.883303	4.73269	2.21565e-06	1.40615e-05	serine rich repeat protein 2
Smp_093160	280.308	-2.61688	0.553303	-4.72956	2.2501e-06	1.42704e-05	STARP antigen
Smp_168670	98.2834	-3.39754	0.718741	-4.72706	2.27788e-06	1.44369e-05	cGMP dependent protein kinase 1
Smp_009800	56.3942	-3.15039	0.666646	-4.72573	2.29295e-06	1.45225e-05	serine:threonine protein kinase Nek10
Smp_136760	301.488	-3.57262	0.756061	-4.72531	2.29764e-06	1.45424e-05	hypothetical protein
Smp_020360	508.845	-0.765757	0.162082	-4.7245	2.30678e-06	1.45904e-05	hypothetical protein
Smp_121780	48.6927	-3.62857	0.768355	-4.72252	2.32942e-06	1.47237e-05	myosin light chain kinase, smooth muscle
Smp_047110	416.371	1.29526	0.274423	4.71993	2.35925e-06	1.49021e-05	ATP dependent RNA helicase DDX52
Smp_126050	65.7272	-3.77673	0.800583	-4.71747	2.38791e-06	1.5073e-05	protocadherin fat 4
Smp_197580	25.6842	-3.30811	0.70138	-4.71657	2.39854e-06	1.51299e-05	tetratricopeptide repeat protein 21b
Smp_135670	32.2923	-3.41895	0.724968	-4.716	2.40524e-06	1.51619e-05	coiled coil domain containing protein 164
Smp_157390	20.9184	-3.79386	0.804932	-4.71327	2.43773e-06	1.53564e-05	lipoma HMGIC fusion partner 2 protein
Smp_156540	84.7941	-3.3688	0.714925	-4.7121	2.45174e-06	1.54343e-05	wnt family member wnt
Smp_023530	1437.25	1.06998	0.227098	4.71155	2.45839e-06	1.54657e-05	nucleosome assembly protein 1 1 like
Smp_020090	128.321	1.35141	0.286838	4.71139	2.46031e-06	1.54674e-05	stem cell tumor
Smp_034670	431.842	1.46538	0.311076	4.71069	2.46882e-06	1.55105e-05	tubulin gamma 1 chain
Smp_176750	203.087	-1.98164	0.420706	-4.71028	2.47377e-06	1.55312e-05	AP2 associated protein kinase 1
Smp_156970	155.913	-3.86714	0.821045	-4.71002	2.47687e-06	1.55402e-05	cadherin
Smp_153810	16.161	-3.73606	0.793431	-4.70874	2.49252e-06	1.56279e-05	hypothetical protein
Smp_114450	16.0554	-3.38971	0.720328	-4.70579	2.52884e-06	1.5845e-05	#N/A
Smp_155740	477.557	1.39847	0.297202	4.70544	2.53314e-06	1.58613e-05	TNF receptor associated protein 1
Smp_152740	102.392	2.28118	0.485134	4.70216	2.5742e-06	1.61077e-05	Cirhin
Smp_141460	49.085	-3.36695	0.716303	-4.70046	2.59572e-06	1.62315e-05	protein FAM92A1
Smp_018950	291.765	1.35099	0.287507	4.69898	2.61469e-06	1.63392e-05	lupus la ribonucleoprotein
Smp_083770	29.5313	-3.78104	0.804988	-4.69701	2.64e-06	1.64864e-05	anoctamin 7
Smp_163810	39.7072	-3.88077	0.826501	-4.69542	2.66061e-06	1.6604e-05	laminin gamma 1 chain
Smp_149070	197.121	1.661	0.353762	4.69523	2.66304e-06	1.6608e-05	Nucleolar protein 6
Smp_008830	683.912	1.18812	0.253186	4.6927	2.69626e-06	1.68041e-05	SWI:SNF related, matrix associated, actin
Smp_158290	76.7521	-2.87515	0.612732	-4.69234	2.70097e-06	1.68222e-05	hypothetical protein
Smp_002180	1304.5	0.86052	0.18342	4.69154	2.71153e-06	1.68768e-05	basic transcription factor 3 4
Smp_013150	149.08	-1.24746	0.266	-4.68968	2.73634e-06	1.70199e-05	riboflavin kinase
Smp_138550	35.8662	-4.14598	0.884123	-4.68937	2.74048e-06	1.70343e-05	cubilin
Smp_150200	327.92	1.67358	0.356946	4.68861	2.75071e-06	1.70865e-05	lethal(2)neighbour of Tid protein
Smp_136380	74.8623	2.26178	0.482425	4.68835	2.75416e-06	1.70966e-05	hypothetical protein
Smp_165570	26.6891	-2.97634	0.635089	-4.6865	2.77921e-06	1.72407e-05	ras dva small gtpase
Smp_176510	51.614	-4.17984	0.892018	-4.68582	2.78835e-06	1.72859e-05	RIMS binding protein 2
Smp_147390	35.2551	-3.40524	0.726905	-4.68458	2.8054e-06	1.73725e-05	glutamate (NMDA) receptor subunit epsilon 2
Smp_091000	10.9906	-4.71546	1.0066	-4.68453	2.80603e-06	1.73725e-05	transmembrane protein 151B
Smp_009430	445.568	1.24898	0.266781	4.68168	2.84531e-06	1.76041e-05	steroid dehydrogenase
Smp_156880	525.438	-1.19207	0.254714	-4.68004	2.86819e-06	1.77339e-05	protein transport protein sec24c
Smp_175920	302.046	1.1942	0.255204	4.6794	2.87723e-06	1.7778e-05	hypothetical protein
Smp_020550	38.2787	-2.91143	0.622577	-4.67641	2.91941e-06	1.80268e-05	low density lipoprotein receptor (ldl)
Smp_124660	56.6041	-2.58571	0.553169	-4.67436	2.94874e-06	1.81959e-05	IQ motif and SEC7 domain containing protein 1
Smp_008220	539.807	1.03709	0.221953	4.67254	2.97492e-06	1.83333e-05	palmitoyltransferase ZDHHC11
Smp_177780	16.8865	-3.87037	0.82831	-4.67261	2.97396e-06	1.83333e-05	hypothetical protein
Smp_191780	54.7614	-3.25228	0.69626	-4.67108	2.99627e-06	1.84527e-05	hypothetical protein
Smp_073050	43.8584	1.94724	0.417184	4.66757	3.04789e-06	1.87582e-05	hypothetical protein
Smp_160330	21.1291	-3.50284	0.750588	-4.6668	3.05927e-06	1.88159e-05	dynein light chain
Smp_156850	100.787	-1.62522	0.348314	-4.66597	3.07169e-06	1.88799e-05	hypothetical protein
Smp_213590	229.853	-1.15155	0.247043	-4.66132	3.14194e-06	1.9299e-05	hypothetical protein
Smp_063110	1142.23	1.16907	0.250869	4.66006	3.16114e-06	1.94042e-05	Zinc finger MYM type protein 3
Smp_175410	15.0101	-5.00706	1.07465	-4.65923	3.17392e-06	1.94699e-05	zinc finger protein 398
Smp_079050	58.2341	3.48157	0.747348	4.65857	3.18414e-06	1.95198e-05	DNA primase large subunit
Smp_059170	24.7031	-3.54596	0.761312	-4.65769	3.1977e-06	1.95901e-05	troponin i
Smp_049740	18.2624	-3.62187	0.777895	-4.65599	3.22429e-06	1.97401e-05	hypothetical protein
Smp_168590	398.824	-1.4004	0.300941	-4.6534	3.26499e-06	1.99762e-05	Pema SRCR protein
Smp_160150	7.73149	-4.1441	0.890923	-4.65147	3.2958e-06	2.01515e-05	glycosyltransferase
Smp_017610	26.9574	-3.56827	0.76749	-4.64927	3.33116e-06	2.03544e-05	amiloride sensitive amine oxidase
Smp_126230	16.2367	-4.02323	0.865743	-4.64714	3.36564e-06	2.05517e-05	hypothetical protein
Smp_057320	784.417	-2.49582	0.537423	-4.64404	3.41657e-06	2.08481e-05	vesicle fusing ATPase 1
Smp_181450	61.6326	-3.09544	0.666558	-4.64392	3.41864e-06	2.08481e-05	DNA double strand break repair rad50 ATPase
Smp_173150	95.701	-2.58793	0.557299	-4.6437	3.42231e-06	2.08569e-05	cd63 antigen
Smp_045650	48.0441	-3.53327	0.761087	-4.6424	3.44385e-06	2.09745e-05	growth arrest specific 8
Smp_180380	203.914	1.31953	0.284389	4.63987	3.48635e-06	2.12196e-05	origin recognition complex protein 1
Smp_147770	19.0105	-2.76128	0.59519	-4.63933	3.49548e-06	2.12613e-05	hypothetical protein
Smp_153180	63.838	-4.03833	0.870728	-4.63788	3.52003e-06	2.13967e-05	striated muscle preferentially expressed protein
Smp_150170	46.9404	-3.17751	0.685404	-4.63596	3.55283e-06	2.15821e-05	Ras associated and pleckstrin y
Smp_049680	595.991	0.974806	0.210447	4.63208	3.6201e-06	2.19765e-05	Corepressor interacting with RBPJ 1
Smp_002080	1308.51	1.52463	0.3294	4.62851	3.68311e-06	2.23445e-05	S adenosylmethionine synthetase
Smp_146750	15.1709	-4.82216	1.04207	-4.62748	3.70136e-06	2.24407e-05	sodium:hydrogen exchanger 2 (nhe2)
Smp_085080	467.567	-1.48293	0.320856	-4.62179	3.80449e-06	2.3051e-05	hypothetical protein
Smp_081920	211.765	3.34801	0.724801	4.61921	3.85201e-06	2.33239e-05	hypothetical protein
Smp_193440	1509.35	1.0395	0.225092	4.61811	3.87257e-06	2.34332e-05	Cell division cycle and apoptosis regulator
Smp_150090	15.5469	-4.21865	0.913905	-4.61607	3.9107e-06	2.36486e-05	Monocarboxylate transporter 14
Smp_144030	447.654	-1.90771	0.413342	-4.61532	3.92485e-06	2.37188e-05	phosphatidate cytidylyltransferase
Smp_166210	168.426	1.12255	0.243436	4.61128	4.00204e-06	2.41697e-05	#N/A
Smp_203130	248.215	-1.99052	0.431729	-4.61059	4.01532e-06	2.42343e-05	Actin 5C
Smp_082360	70.4129	-3.59859	0.78072	-4.60933	4.03975e-06	2.4366e-05	protein tyrosine kinase
Smp_145990	261.31	1.10009	0.238724	4.60819	4.06193e-06	2.4484e-05	Caseinolytic peptidase B protein
Smp_191500	47.5081	-3.52791	0.765759	-4.60708	4.08363e-06	2.4599e-05	potassium channel, KvQLT family member (kqt 1)
Smp_180470	255.747	-1.00667	0.218521	-4.60675	4.09007e-06	2.4622e-05	Dynein intermediate chain
Smp_174090	47.4984	-3.78401	0.821555	-4.60592	4.10652e-06	2.47051e-05	coiled coil domain containing protein 40
Smp_172250	268.772	-2.9343	0.637128	-4.6055	4.11473e-06	2.47386e-05	inositol 5 phosphatase
Smp_019010	1948.4	1.52568	0.331283	4.60537	4.11742e-06	2.47388e-05	dipeptidyl peptidase III (M49 family)
Smp_154660	14.9487	-3.2099	0.697115	-4.60455	4.13362e-06	2.48203e-05	ribc1
Smp_169210	56.3797	-2.04495	0.444193	-4.60375	4.14956e-06	2.49e-05	protein regulator of cytokinesis 1
Smp_211100	819.266	1.72569	0.374998	4.60187	4.18717e-06	2.51096e-05	inner nuclear membrane protein man1
Smp_175490	48.3511	2.42339	0.52691	4.59926	4.24003e-06	2.54103e-05	sister chromatid cohesion protein PDS5
Smp_006630	404.916	1.64758	0.358281	4.59858	4.25373e-06	2.54761e-05	myb binding protein
Smp_100350	125.755	-2.55052	0.554863	-4.59668	4.29281e-06	2.56937e-05	hypothetical protein
Smp_199100	133.926	1.53133	0.333193	4.59593	4.3083e-06	2.577e-05	TFIIH basal transcription factor complex
Smp_072450	81.3405	-2.67422	0.582373	-4.59194	4.39151e-06	2.62509e-05	rhodopsin orphan GPCR
Smp_053900	323.174	-1.39708	0.304309	-4.59098	4.41172e-06	2.63458e-05	beta hexosaminidase subunit beta
Smp_155610	31.5659	-2.92289	0.636667	-4.59092	4.41301e-06	2.63458e-05	fast skeletal troponin beta
Smp_143380	143.007	2.24246	0.488579	4.58976	4.43762e-06	2.64752e-05	mismatch repair endonuclease PMS2
Smp_149390	80.2761	-2.6987	0.588	-4.58963	4.44035e-06	2.64752e-05	fras1 related extracellular matrix protein
Smp_180270	6.72249	-4.5644	0.994626	-4.58907	4.45234e-06	2.65298e-05	hypothetical protein
Smp_156750	51.2344	3.37985	0.736727	4.58765	4.48253e-06	2.66927e-05	hypothetical protein
Smp_155480	234.082	1.05867	0.230789	4.58719	4.4925e-06	2.67351e-05	tetratricopeptide repeat protein 4
Smp_140940	70.27	-2.01873	0.440319	-4.58469	4.54656e-06	2.70396e-05	hypothetical protein
Smp_138210	170.647	-2.34563	0.511969	-4.58159	4.61459e-06	2.74268e-05	hypothetical protein
Smp_081700	12.0642	-3.70579	0.809297	-4.57902	4.67152e-06	2.77475e-05	TIA1 cytotoxic granule associated RNA binding
Smp_097660	3174.76	1.55974	0.340652	4.57869	4.67886e-06	2.77735e-05	eukaryotic initiation factor 4A
Smp_149230	24.8628	-3.45507	0.754736	-4.57786	4.69759e-06	2.7867e-05	iroquois class homeodomain protein IRX 6
Smp_031880	2066.44	-1.30467	0.285046	-4.57704	4.71604e-06	2.7941e-05	Immunoglobulin domain containing protein
Smp_081200	48.8077	-2.61317	0.570917	-4.57716	4.71342e-06	2.7941e-05	coiled coil domain containing protein 42 like 2
Smp_150360	599.927	1.68438	0.368162	4.5751	4.75999e-06	2.81836e-05	ubiquitin protein ligase edd
Smp_024140	6653.34	0.943114	0.206213	4.57351	4.79626e-06	2.83804e-05	polyadenylate binding protein
Smp_067800	2604.29	-1.85236	0.40505	-4.57317	4.80399e-06	2.84082e-05	fibrillin 2
Smp_073610	499.507	1.10299	0.241307	4.57089	4.85666e-06	2.87015e-05	transcriptional co activator crsp77
Smp_165040	14.347	-3.81226	0.834596	-4.56779	4.92884e-06	2.91097e-05	tbc1 domain family member
Smp_170210	18.8307	-4.08614	0.894609	-4.56751	4.93541e-06	2.91301e-05	tektin 2 (testicular)
Smp_120800	319.422	-1.45666	0.319068	-4.56535	4.9867e-06	2.94143e-05	DNAj subfamily C member
Smp_129090	5.98554	-4.39403	0.963082	-4.56247	5.0556e-06	2.98019e-05	hypothetical protein
Smp_174400	14.9545	-5.00127	1.09648	-4.56119	5.08654e-06	2.99655e-05	hypothetical protein
Smp_029800	108.819	-2.08683	0.457628	-4.5601	5.11292e-06	3.01019e-05	band 4
Smp_169660	100.893	-3.77793	0.828606	-4.55938	5.13047e-06	3.01862e-05	hypothetical protein
Smp_143600	10.887	5.08914	1.11652	4.55805	5.16299e-06	3.0345e-05	normocyte binding protein 1
Smp_027220	528.31	1.45472	0.319156	4.55802	5.16393e-06	3.0345e-05	lethal, Chr 7, Rinchik 6
Smp_180290	258.026	-3.03911	0.666854	-4.55738	5.17959e-06	3.04179e-05	membrane associated guanylate kinase ww and pdz
Smp_062760	33.5446	-3.90594	0.857186	-4.5567	5.1964e-06	3.04975e-05	regulator of G protein signaling 3
Smp_123020	120.687	-3.68849	0.809505	-4.55648	5.20181e-06	3.05101e-05	protein serine:threonine kinase
Smp_142550	139.679	2.02548	0.444566	4.55607	5.21186e-06	3.05499e-05	nuclear pore membrane
Smp_167650	17.339	-4.62191	1.01481	-4.55445	5.25219e-06	3.0767e-05	rho guanine nucleotide exchange factor 17
Smp_135920	57.7233	-2.95613	0.649462	-4.55167	5.3223e-06	3.11582e-05	centrosomal protein of 164 kDa
Smp_034080	26.9664	-3.39981	0.747031	-4.5511	5.3367e-06	3.1223e-05	erythrocyte membrane protein
Smp_135040	15.6171	-4.35805	0.958379	-4.54732	5.43333e-06	3.17685e-05	gamma aminobutyric acid receptor subunit
Smp_065420	560.529	0.93617	0.205906	4.54659	5.45223e-06	3.18591e-05	hypothetical protein
Smp_164360	38.8727	-3.23914	0.712565	-4.54574	5.4742e-06	3.19676e-05	hypothetical protein
Smp_073290	895.376	1.19534	0.263049	4.54419	5.51476e-06	3.21843e-05	serine:threonine protein phosphatase 4
Smp_024870	147.422	-2.48481	0.54692	-4.54328	5.5386e-06	3.23033e-05	hypothetical protein
Smp_055780	24.5285	-4.5537	1.00247	-4.54246	5.5602e-06	3.24091e-05	smdr2
Smp_047860	293.942	1.40013	0.308294	4.54153	5.58463e-06	3.25313e-05	ribosomal pseudouridine synthase
Smp_145210	65.7989	-3.40765	0.750599	-4.53991	5.62776e-06	3.27621e-05	protocadherin 1
Smp_069900	658.779	-0.799949	0.176472	-4.533	5.8152e-06	3.38323e-05	ras protein Rab 39B
Smp_150310	13.8896	-4.50563	0.994016	-4.53276	5.82192e-06	3.38503e-05	hypothetical protein
Smp_157820	138.876	1.95429	0.431555	4.52849	5.94071e-06	3.45195e-05	serine protein kinase ATM
Smp_135270	176.611	-1.50329	0.332199	-4.52527	6.03175e-06	3.50268e-05	hypothetical protein
Smp_137420	29.1289	-2.95423	0.653046	-4.52377	6.07481e-06	3.5255e-05	hypothetical protein
Smp_123230	59.3392	-3.23247	0.71459	-4.52353	6.08165e-06	3.52728e-05	Sm50 protein
Smp_168070	380.659	-2.03911	0.451018	-4.52113	6.15105e-06	3.56532e-05	TNFR
Smp_145900	9.55856	-4.13639	0.915795	-4.51671	6.28065e-06	3.63819e-05	sphingolipid delta(4) desaturase:C4 hydroxylase
Smp_096760	1180.71	-1.54349	0.341754	-4.51638	6.29056e-06	3.64168e-05	phosphoglycerate mutase
Smp_174150	19.5352	-4.12833	0.914184	-4.51586	6.30607e-06	3.6484e-05	myeloid ecotropic viral integration site 1
Smp_127860	14.0301	-4.68034	1.03657	-4.51522	6.32523e-06	3.65723e-05	fmrfamide receptor
Smp_146360	66.601	1.85132	0.410033	4.51504	6.33046e-06	3.65799e-05	twinkle protein mitochondrial
Smp_135120	255.354	1.46067	0.323538	4.51468	6.34137e-06	3.66203e-05	ribosome biogenesis protein bop1
Smp_138160	317.816	1.37723	0.305076	4.51438	6.35035e-06	3.66496e-05	hypothetical protein
Smp_034420	889.381	-1.52722	0.338703	-4.50901	6.51296e-06	3.75649e-05	proteinase inhibitor I25
Smp_162230	587.076	-2.51767	0.558432	-4.50846	6.52989e-06	3.76393e-05	microtubule associated protein tau
Smp_083340	695.746	0.768768	0.170528	4.50815	6.53956e-06	3.76719e-05	hypothetical protein
Smp_021140	2654.13	1.71657	0.380804	4.50775	6.55192e-06	3.77199e-05	ribosomal protein S8
Smp_045920	217.264	-1.5064	0.334262	-4.50664	6.58614e-06	3.78936e-05	hypothetical protein
Smp_058460	992.894	0.893149	0.19828	4.50448	6.65345e-06	3.82573e-05	eukaryotic translation initiation factor 3
Smp_213810	208.11	1.75099	0.388872	4.50274	6.70819e-06	3.85484e-05	centromere:kinetochore protein zw10
Smp_138750	125.683	-1.76663	0.392895	-4.49646	6.90941e-06	3.96803e-05	alpha fucosyltransferase m
Smp_129350	181.297	-1.91625	0.426265	-4.49544	6.94264e-06	3.98468e-05	ras and EF hand domain containing protein
Smp_179180	1712.34	1.71089	0.380699	4.49409	6.98685e-06	4.00759e-05	ribosomal protein S2 eukaryotic and archaeal
Smp_143860	22.3009	-2.66965	0.594206	-4.49281	7.02902e-06	4.02931e-05	hypothetical protein
Smp_175930	54.0391	-4.45177	0.991393	-4.49042	7.10823e-06	4.07222e-05	ELAVprotein 2:3:4
Smp_177010	29.9382	-2.78401	0.620434	-4.48721	7.21632e-06	4.13162e-05	serine:threonine:tyrosine interacting
Smp_138480	369.864	1.24691	0.278091	4.48384	7.33129e-06	4.19488e-05	hypothetical protein
Smp_043070	183.91	1.19931	0.26758	4.48208	7.392e-06	4.22703e-05	phosphorylated adapter rna export protein
Smp_154220	7.75511	-4.66325	1.0406	-4.4813	7.41884e-06	4.23979e-05	hypothetical protein
Smp_133710	452.18	1.7906	0.39973	4.47951	7.48129e-06	4.27287e-05	hypothetical protein
Smp_124500	12.797	-3.94064	0.87992	-4.4784	7.52034e-06	4.29255e-05	a disintegrin and metalloproteinase with
Smp_151800	19.8639	-3.76612	0.84254	-4.46996	7.8235e-06	4.46288e-05	hypothetical protein
Smp_160780	36.2772	-2.67423	0.598299	-4.46972	7.83217e-06	4.4651e-05	potassium voltage gated channel protein
Smp_038950	2258.32	-1.53025	0.342597	-4.46661	7.94672e-06	4.52765e-05	lactate dehydrogenase protein
Smp_199490	15.8204	-3.48312	0.780076	-4.4651	8.00311e-06	4.557e-05	diacylglycerol kinase zeta iota
Smp_059800	318.654	1.29707	0.29054	4.46434	8.03146e-06	4.57036e-05	prenyl transferase
Smp_194990	18.3052	-3.61366	0.80976	-4.46263	8.09585e-06	4.60421e-05	alpha(13)fucosyltransferase
Smp_041430	504.877	-1.21143	0.27149	-4.46216	8.11381e-06	4.61162e-05	tyrosine 3 monooxygenase
Smp_082740	286.17	-1.27994	0.286902	-4.46123	8.14919e-06	4.62892e-05	Na(+):H(+) exchange regulatory cofactor
Smp_173030	33.4766	-3.26694	0.732654	-4.45905	8.23233e-06	4.67331e-05	aminopeptidase A (M01 family)
Smp_131010	17.176	-4.51666	1.01336	-4.4571	8.30746e-06	4.7131e-05	protocadherin gamma a10
Smp_125980	87.5329	-3.04146	0.682664	-4.45528	8.37849e-06	4.75052e-05	tetratricopeptide repeat protein 25
Smp_000910	30.2224	-3.30613	0.742126	-4.45494	8.39154e-06	4.75504e-05	cancer susceptibility candidate protein 1
Smp_151040	56.2629	-3.44851	0.774313	-4.45364	8.44253e-06	4.78104e-05	cyclin dependent kinase 5 activator 1
Smp_177540	18.9826	2.67029	0.599595	4.45349	8.44876e-06	4.78167e-05	#N/A
Smp_162670	20.6205	-3.24664	0.729125	-4.45279	8.47635e-06	4.79149e-05	sperm associated antigen 17
Smp_056260	22.7071	-3.35193	0.752769	-4.4528	8.47567e-06	4.79149e-05	xylosylprotein beta4 galactosyltransferase
Smp_125530	318.578	1.0166	0.228429	4.4504	8.57115e-06	4.84216e-05	gamma tubulin complex component 2
Smp_161640	24.1835	-3.16419	0.711215	-4.44899	8.62739e-06	4.87099e-05	transient receptor potential cation channel
Smp_071970	178.585	-1.56536	0.351871	-4.44867	8.64024e-06	4.8753e-05	chloride channel protein 3
Smp_124460	729.617	1.00244	0.225458	4.44626	8.73774e-06	4.92735e-05	ATP binding cassette sub family E
Smp_202380	16.6601	3.49278	0.785932	4.44413	8.82495e-06	4.97096e-05	#N/A
Smp_001560	89.2707	-3.36831	0.757927	-4.44411	8.8257e-06	4.97096e-05	e3 ubiquitin protein ligase ZSWIM2
Smp_180800	107.526	1.45189	0.326805	4.44268	8.88439e-06	5.00101e-05	hypothetical protein
Smp_025740	568.771	-1.24861	0.281119	-4.44158	8.93012e-06	5.02373e-05	Rho GTP binding protein RhoU
Smp_063120	215.149	1.19206	0.268575	4.43847	9.06e-06	5.09234e-05	inosine triphosphate pyrophosphatase
Smp_033330	591.902	-1.12943	0.254467	-4.4384	9.06296e-06	5.09234e-05	sh3 domain binding glutamic acid rich
Smp_197080	68.912	-3.46971	0.782658	-4.43324	9.28281e-06	5.21274e-05	titin
Smp_163960	359.851	-1.67004	0.376853	-4.43153	9.35666e-06	5.25106e-05	Wilms tumor protein 1 interacting protein
Smp_000600	444.644	1.19844	0.270504	4.43039	9.40646e-06	5.27585e-05	notchless protein 1
Smp_155810	41.3198	-4.1055	0.92687	-4.42943	9.44846e-06	5.29623e-05	protocadherin 11
Smp_013690	363.402	-0.907967	0.204996	-4.4292	9.45828e-06	5.29856e-05	BRO1 domain containing protein BROX
Smp_021070	232.839	1.79	0.404172	4.42881	9.47532e-06	5.30493e-05	guanine nucleotide binding protein
Smp_146910	6.68788	-4.43897	1.00274	-4.42683	9.56291e-06	5.35077e-05	choline acetyltransferase
Smp_083380	508.15	-1.1694	0.264346	-4.42375	9.7002e-06	5.42435e-05	coiled coil domain containing protein 149
Smp_169880	8.10439	-4.46671	1.00975	-4.4236	9.70681e-06	5.4248e-05	hypothetical protein
Smp_076930	30.7466	-2.25044	0.508987	-4.42141	9.8061e-06	5.47702e-05	rho guanine nucleotide exchange factor 33
Smp_170340	44.6172	-2.04252	0.46231	-4.41808	9.95795e-06	5.55852e-05	collagen alpha 1(IV) chain
Smp_007690	8.82156	-4.84931	1.09812	-4.41601	1.00541e-05	5.60883e-05	tyrosine 3 monooxygenase
Smp_153870	141.327	-2.26568	0.513172	-4.41504	1.00991e-05	5.63057e-05	serine:threonine protein kinase ULK4
Smp_141360	175.851	-1.64405	0.372424	-4.41444	1.01272e-05	5.64292e-05	pyruvate carboxylase, mitochondrial
Smp_118560	110.468	-1.93008	0.4373	-4.41363	1.01652e-05	5.6607e-05	hypothetical protein
Smp_186020	53.4109	2.59158	0.58726	4.41299	1.01952e-05	5.67402e-05	major egg antigen
Smp_210630	802.095	1.80545	0.409178	4.4124	1.02233e-05	5.68629e-05	histone H2A
Smp_008500	707.361	0.887352	0.201135	4.41172	1.02554e-05	5.70075e-05	protein iws1
Smp_001520	63.0924	-1.49976	0.340188	-4.40863	1.04024e-05	5.77907e-05	hypothetical protein
Smp_196240	27.1038	-3.90232	0.885746	-4.40569	1.05448e-05	5.85467e-05	protocadherin 11
Smp_156630	464.599	-2.56358	0.581965	-4.40504	1.05763e-05	5.8687e-05	hypothetical protein
Smp_138260	9.9467	-4.55963	1.03597	-4.40132	1.07593e-05	5.9667e-05	hypothetical protein
Smp_210320	40.8174	2.05231	0.466472	4.39964	1.0843e-05	6.00955e-05	Homocysteine S methyltransferase ybgG
Smp_060660	9.42421	-4.52389	1.02845	-4.39875	1.08877e-05	6.03075e-05	hypothetical protein
Smp_134480	267.409	1.24496	0.283087	4.39781	1.09347e-05	6.0532e-05	hypothetical protein
Smp_060950	982.373	-1.25134	0.284586	-4.39706	1.09729e-05	6.07076e-05	alpha soluble NSF attachment protein
Smp_156030	20.2831	-3.58869	0.81622	-4.39672	1.09897e-05	6.07646e-05	hypothetical protein
Smp_058500	19.7385	-2.89409	0.658935	-4.39208	1.12271e-05	6.20409e-05	hypothetical protein
Smp_125500	216.151	1.19815	0.272823	4.39167	1.12486e-05	6.21226e-05	prenylcysteine oxidase
Smp_027080	610.086	1.58127	0.360129	4.39083	1.1292e-05	6.23256e-05	protein YIPF5 (YIP1 family)
Smp_187750	26.6444	-3.54123	0.806586	-4.39039	1.13148e-05	6.24145e-05	hypothetical protein
Smp_075870	1632.2	1.06163	0.241847	4.38968	1.13516e-05	6.25809e-05	Translocation associated membrane protein 1
Smp_105950	78.4318	-2.3442	0.534194	-4.38829	1.14243e-05	6.29449e-05	armadillo repeat containing protein 3
Smp_174680	176.616	1.28712	0.293728	4.38202	1.17581e-05	6.46697e-05	Diphthamide biosynthesis protein 2
Smp_156910	128.845	-2.53639	0.578805	-4.38211	1.17536e-05	6.46697e-05	hypothetical protein
Smp_141180	18.5119	-3.72316	0.849608	-4.38221	1.17479e-05	6.46697e-05	hypothetical protein
Smp_057580	13.6043	-2.62764	0.599726	-4.3814	1.17919e-05	6.48175e-05	hypothetical protein
Smp_194840	265.543	1.7946	0.409637	4.38095	1.18162e-05	6.49127e-05	Niemann Pick C2 protein
Smp_130300	621.632	-1.96163	0.447839	-4.38021	1.18563e-05	6.50952e-05	Na+:K+ ATPase alpha subunit
Smp_152330	291.032	-2.23121	0.509499	-4.37923	1.19102e-05	6.53525e-05	cAMP dependent protein kinase catalytic subunit
Smp_212750	7.96213	-4.63537	1.0586	-4.37879	1.19342e-05	6.54458e-05	smad
Smp_191310	27.4518	-4.02093	0.918518	-4.37763	1.19976e-05	6.57552e-05	histone deacetylase 4
Smp_138840	286.094	-1.21574	0.277739	-4.37726	1.2018e-05	6.58284e-05	syntaxin
Smp_200410	201.226	1.61068	0.368223	4.37419	1.21883e-05	6.67219e-05	thymidylate synthase
Smp_008490	6.54257	-3.9758	0.909173	-4.37299	1.22558e-05	6.70526e-05	glycogenin 1
Smp_165890	27.6572	-3.32906	0.76133	-4.37269	1.22727e-05	6.71055e-05	rab6 interacting protein 2:elks:erc:cast
Smp_151520	337.492	1.07766	0.246511	4.37165	1.23313e-05	6.73865e-05	dolichyl pyrophosphate Glc1Man9GlcNAc2
Smp_151050	580.407	-0.965959	0.221019	-4.37049	1.2397e-05	6.77062e-05	protein roadkill
Smp_213480	16.7296	3.27506	0.749475	4.3698	1.2436e-05	6.78795e-05	muts protein
Smp_123240	133.496	1.69371	0.387613	4.3696	1.24476e-05	6.79033e-05	hypothetical protein
Smp_151060	143.943	-1.52506	0.349089	-4.36868	1.25e-05	6.81098e-05	family S60 non peptidase ue (S60 family)
Smp_201700	63.7753	-3.00306	0.687393	-4.36876	1.24953e-05	6.81098e-05	hypothetical protein
Smp_169700	65.1408	-2.49175	0.570685	-4.36625	1.264e-05	6.87924e-05	lim domain and actin binding 1
Smp_168600	15.0839	-4.67799	1.07138	-4.36633	1.26354e-05	6.87924e-05	aryl hydrocarbon receptor
Smp_028910	11.3402	-3.50146	0.801989	-4.36598	1.26556e-05	6.88373e-05	alpha(13)fucosyltransferase
Smp_129510	127.565	2.12984	0.487904	4.36529	1.26955e-05	6.90142e-05	metallophosphoesterase domain containing protein
Smp_212720	14.9031	-3.17801	0.728214	-4.36412	1.27638e-05	6.93453e-05	methylmalonyl CoA epimerase, putative
Smp_048660	810.198	1.72554	0.395462	4.36336	1.28082e-05	6.95461e-05	nucleolar protein 56
Smp_211110	377.888	1.02454	0.23495	4.36067	1.29664e-05	7.03643e-05	cleavage and polyadenylation
Smp_054540	1108.25	-0.670281	0.153736	-4.35996	1.30088e-05	7.05537e-05	Microtubule associated protein RP:EB family
Smp_073210	332.01	-0.853206	0.195738	-4.35891	1.30713e-05	7.08514e-05	ADP ribosylation factor interacting protein
Smp_159160	69.6372	-3.26906	0.750042	-4.35851	1.30953e-05	7.09403e-05	EF hand domain containing protein 1
Smp_162400	9.69864	-3.65128	0.837802	-4.35817	1.31154e-05	7.10085e-05	hypothetical protein
Smp_159260	22.8566	-2.6344	0.604791	-4.35588	1.32533e-05	7.17134e-05	protein broad minded
Smp_020170	42.752	-3.34446	0.768005	-4.35474	1.33228e-05	7.20477e-05	high voltage-activated calcium channel Cav2A
Smp_037510	13.9498	-3.64115	0.836698	-4.35181	1.35016e-05	7.29727e-05	innexin unc 9
Smp_176460	186.057	1.33617	0.307058	4.35152	1.35196e-05	7.30279e-05	hypothetical protein
Smp_158270	72.4442	1.3561	0.311667	4.35113	1.3544e-05	7.31172e-05	hypothetical protein
Smp_034450	132.835	1.58621	0.364672	4.3497	1.36325e-05	7.35525e-05	Round spermatid basic protein 1 protein
Smp_152390	25.8691	-3.40389	0.782836	-4.34815	1.37288e-05	7.40294e-05	hypothetical protein
Smp_130510	10.4862	-4.42772	1.01848	-4.34738	1.37771e-05	7.42475e-05	pleckstrin y domain containing family H
Smp_013570	54.3424	2.25664	0.519144	4.34685	1.38109e-05	7.43864e-05	hypothetical protein
Smp_199800	65.4293	1.94084	0.446709	4.34476	1.39426e-05	7.50527e-05	coiled coil domain containing protein 111
Smp_144650	16.4078	-3.92627	0.903793	-4.34422	1.39772e-05	7.51956e-05	hypothetical protein
Smp_212550	9.71068	-3.84559	0.886785	-4.33655	1.44738e-05	7.78228e-05	calcium dependent secretion
Smp_157470	28.9931	-2.88733	0.665913	-4.3359	1.45165e-05	7.80077e-05	tetratricopeptide repeat protein 23
Smp_078920	119.63	3.31885	0.765559	4.33519	1.45631e-05	7.8213e-05	condensin complex subunit 3
Smp_213060	249.455	1.45536	0.335994	4.33151	1.48088e-05	7.9487e-05	polycomb group RING finger protein 2
Smp_134450	40.823	-2.46015	0.568026	-4.33105	1.48403e-05	7.96102e-05	hypothetical protein
Smp_163650	34.7534	-3.7554	0.867142	-4.33078	1.48581e-05	7.96604e-05	C terminal pdz ligand of neuronal nitric oxide
Smp_151960	24.6782	-3.88096	0.896816	-4.32748	1.50822e-05	8.08153e-05	Rho GTPase activating protein 22
Smp_129870	32.3688	-3.16328	0.731163	-4.32638	1.51583e-05	8.11766e-05	cement protein 3B variant 1
Smp_023290	17.5006	-3.51331	0.812927	-4.3218	1.54758e-05	8.28297e-05	glutamate receptor delta 1 subunit
Smp_151310	27.7568	-4.15311	0.961455	-4.31961	1.56306e-05	8.36104e-05	netrin
Smp_016990	325.682	1.20683	0.27948	4.31812	1.57364e-05	8.41282e-05	Methylosome subunit pICln
Smp_096670	49.9044	-2.90302	0.672594	-4.31614	1.58778e-05	8.48356e-05	serine:threonine protein kinase PAK 1
Smp_212740	344.747	-1.22405	0.283726	-4.3142	1.60182e-05	8.55372e-05	Mothers against decapentaplegic homolog
Smp_020370	1159.07	-0.824037	0.191044	-4.31334	1.6081e-05	8.58232e-05	reticulon 1
Smp_137970	311.391	1.57439	0.365235	4.31063	1.62791e-05	8.68312e-05	PHD finger protein
Smp_149480	344.533	-0.85935	0.199371	-4.3103	1.63035e-05	8.69116e-05	hypothetical protein
Smp_055400	364.495	1.00635	0.233528	4.30936	1.6373e-05	8.72327e-05	tubulin folding cofactor B
Smp_059600	327.942	-2.30402	0.534752	-4.30859	1.64302e-05	8.74873e-05	tektin 3
Smp_147090	18.0104	-3.56368	0.827198	-4.30814	1.64635e-05	8.76152e-05	hypothetical protein
Smp_189830	17.168	-3.10787	0.721528	-4.30734	1.65229e-05	8.7881e-05	hypothetical protein
Smp_099320	380.044	1.08951	0.252956	4.30712	1.65393e-05	8.79184e-05	eukaryotic translation initiation factor 3
Smp_186170	9.58378	3.92685	0.911807	4.30667	1.65729e-05	8.80472e-05	Gag protein
Smp_127460	70.5682	-3.25081	0.75492	-4.30616	1.66111e-05	8.82001e-05	hypothetical protein
Smp_140190	20.6908	-4.40515	1.02313	-4.30555	1.66572e-05	8.83946e-05	G protein coupled receptor fragment
Smp_055740	9.43603	3.89516	0.905137	4.30339	1.68204e-05	8.921e-05	nanos protein
Smp_128230	133.115	-1.85987	0.432507	-4.30022	1.70631e-05	9.04459e-05	neurogenic locus notch protein
Smp_139740	95.2314	3.10504	0.722405	4.29819	1.72198e-05	9.1225e-05	signal induced proliferation associated 1
Smp_091810	600.02	1.15541	0.268856	4.2975	1.72735e-05	9.14578e-05	#N/A
Smp_146250	227.876	-2.08752	0.486003	-4.29528	1.74471e-05	9.22924e-05	fucosidase, alpha L 2, plasma
Smp_124990	10.0511	-4.90151	1.14115	-4.29523	1.74509e-05	9.22924e-05	ras protein family 2 like
Smp_136440	10.3436	-4.42777	1.03096	-4.29481	1.7484e-05	9.24153e-05	voltage gated potassium channel
Smp_210950	62.2943	1.6413	0.382193	4.29443	1.75144e-05	9.24782e-05	zinc transporter ZIP11
Smp_071630	1288.45	-0.889387	0.207103	-4.29441	1.75156e-05	9.24782e-05	rab-2,4,14, putative
Smp_180850	8.79875	-4.05798	0.945155	-4.29345	1.75918e-05	9.28277e-05	hypothetical protein
Smp_155240	105.232	-3.02338	0.704234	-4.29315	1.76157e-05	9.29018e-05	tubulin tyrosine ligase family
Smp_159200	10.3695	-3.83268	0.893223	-4.29084	1.77999e-05	9.38202e-05	hypothetical protein
Smp_026920	27.2414	-3.7121	0.865212	-4.29039	1.78363e-05	9.39591e-05	GTP cyclohydrolase I
Smp_196540	17.9628	-3.85847	0.899664	-4.2888	1.79644e-05	9.4581e-05	RIB43A domain with coiled coils 1
Smp_155150	11.8703	-3.27279	0.763217	-4.28815	1.80163e-05	9.47674e-05	lin 7 protein
Smp_135650	8.01171	-4.60173	1.07314	-4.28811	1.80201e-05	9.47674e-05	hypothetical protein
Smp_100380	132.688	1.7836	0.416231	4.28511	1.82652e-05	9.60024e-05	dna replication complex gins protein psf2
Smp_157000	168.817	-1.71554	0.400525	-4.28324	1.84191e-05	9.67572e-05	GTPase ObgE
Smp_029790	16.5156	-3.38682	0.790961	-4.2819	1.85301e-05	9.72858e-05	hypothetical protein
Smp_062890	855.404	-1.6231	0.379216	-4.28014	1.86775e-05	9.80045e-05	V type proton ATPase 16 kDa proteolipid
Smp_183860	15.5768	3.27238	0.765291	4.276	1.90285e-05	9.97902e-05	KRAB A domain containing protein
Smp_164640	90.191	-3.74471	0.875802	-4.27574	1.905e-05	9.98474e-05	neuron navigator 2
Smp_155500	20.2751	4.0268	0.942556	4.27221	1.93544e-05	0.000101386	DNA polymerase theta
Smp_147110	44.0114	-3.30465	0.77406	-4.26924	1.96137e-05	0.000102687	fibronectin type 3 and ankyrin repeat domains
Smp_146010	230.999	1.39857	0.327929	4.26486	2.00026e-05	0.000104664	insulysin unit 3 (M16 family)
Smp_047660	53.5957	-2.4344	0.570904	-4.26412	2.0069e-05	0.000104953	Ferritin-2 heavy chain
Smp_158280	152.409	1.40835	0.330519	4.26102	2.03493e-05	0.0001063	zinc finger protein
Smp_129170	17.9174	-4.2319	0.993159	-4.26105	2.03467e-05	0.0001063	dual specificity
Smp_165370	16.2934	-3.15557	0.741255	-4.25707	2.07127e-05	0.000108138	hypothetical protein
Smp_170150	69.6382	-2.67365	0.628217	-4.25594	2.08169e-05	0.000108621	hypothetical protein
Smp_122980	20.3276	-2.80406	0.658999	-4.25503	2.09026e-05	0.000109008	KLHL5 protein
Smp_167390	26.1243	-3.87246	0.91086	-4.25144	2.12403e-05	0.000110707	copine VIII
Smp_212380	64.5812	-1.97748	0.465522	-4.24788	2.15799e-05	0.000112415	ubiquitin specific peptidase 2 (C19 family)
Smp_181630	10.3281	3.74107	0.880909	4.24683	2.16813e-05	0.00011288	hypothetical protein
Smp_122880	12.9713	-3.67036	0.86457	-4.2453	2.18299e-05	0.000113591	hypothetical protein
Smp_087270	572.095	0.856012	0.201658	4.24487	2.18719e-05	0.000113746	pre mRNA splicing factor ATP dependent
Smp_147050	434.252	-1.99339	0.469748	-4.24352	2.20039e-05	0.000114369	v type proton atpase catalytic subunit a
Smp_021260	16.0615	-4.09058	0.964413	-4.24152	2.22011e-05	0.00011533	protein phosphatase 1 regulatory subunit
Smp_149530	46.2897	-2.45167	0.578425	-4.23853	2.24987e-05	0.000116746	leucine, glutamate and lysine rich protein
Smp_179370	19.755	-3.92583	0.926222	-4.23855	2.24973e-05	0.000116746	low density lipoprotein-receptor related protein
Smp_208010	303.78	1.07245	0.253266	4.23447	2.29092e-05	0.00011881	geranylgeranyl transferase type 2 subunit alpha
Smp_094880	676.289	-1.07539	0.254017	-4.23354	2.30044e-05	0.000119238	glucan ( alpha) branching enzyme
Smp_140030	37.1195	-2.91185	0.687889	-4.23303	2.30568e-05	0.000119444	intraflagellar transport 74
Smp_135250	15.9525	-3.31341	0.783204	-4.23059	2.33082e-05	0.000120679	Placenta specificprotein 8 protein
Smp_174430	12.8008	-3.51934	0.832138	-4.22928	2.34438e-05	0.000121314	hypothetical protein
Smp_044280	438.812	1.87257	0.442787	4.22906	2.34665e-05	0.000121365	rRNA 2' O methyltransferase fibrillarin
Smp_168710	49.9497	-2.57793	0.610186	-4.22482	2.39127e-05	0.000123604	hypothetical protein
Smp_124760	27.515	-3.3439	0.791513	-4.22469	2.3927e-05	0.000123609	hypothetical protein
Smp_150430	7.54059	-5.03697	1.19242	-4.22416	2.39836e-05	0.000123834	Fork head domain transcription factor slp2
Smp_145090	323.913	-2.13196	0.504819	-4.22322	2.4084e-05	0.000124284	serine incorporator 5
Smp_054120	510.68	1.53091	0.362796	4.21977	2.44556e-05	0.000126132	ribosome biogenesis protein NSA2
Smp_155210	184.72	1.14518	0.27144	4.2189	2.455e-05	0.000126539	tetratricopeptide repeat protein 5
Smp_124920	274.633	-1.28291	0.304094	-4.21879	2.45616e-05	0.000126539	hypothetical protein
Smp_032480	407.093	1.36437	0.323641	4.21567	2.49032e-05	0.000128228	cohesin subunit SA 1
Smp_168640	7.27449	-4.34191	1.02998	-4.21553	2.49187e-05	0.000128238	hypothetical protein
Smp_063640	2446.49	-1.42539	0.338173	-4.21496	2.49819e-05	0.000128421	g protein beta subunit
Smp_134570	41.5537	-3.38282	0.802566	-4.215	2.49777e-05	0.000128421	hypothetical protein
Smp_180580	52.5253	-3.09676	0.735021	-4.21316	2.51817e-05	0.000129378	trichoplein keratin filament binding protein
Smp_170630	160.23	-2.07034	0.491867	-4.20915	2.56328e-05	0.000131623	Periostin, putative
Smp_029470	63.3229	-1.59624	0.37969	-4.20406	2.62171e-05	0.00013455	thimet oligopeptidase
Smp_155600	13.5395	-4.25439	1.01239	-4.20234	2.64166e-05	0.000135499	protocadherin 11
Smp_042090	1697.73	1.48827	0.354167	4.20218	2.64359e-05	0.000135524	60S ribosomal protein L10a
Smp_090980	121.502	-2.60079	0.619062	-4.20118	2.65522e-05	0.000135993	cyclin dependent kinase 20
Smp_168980	28.4251	-3.21333	0.764869	-4.20115	2.65565e-05	0.000135993	adenylate cyclase
Smp_127720	8.7168	-4.56355	1.08655	-4.20005	2.66859e-05	0.000136581	biogenic amine (dopamine) receptor
Smp_079840	284.371	-1.32958	0.316662	-4.19873	2.68416e-05	0.000137303	uroporphyrinogen III synthase
Smp_170960	188.543	-3.48112	0.82912	-4.19857	2.68606e-05	0.000137325	serine rich repeat protein
Smp_140600	10.2931	-4.56103	1.08676	-4.1969	2.70598e-05	0.000138268	protein jagged 1
Smp_103100	433.357	1.18443	0.282243	4.1965	2.71076e-05	0.000138437	nuclear pore complex protein nup93
Smp_179920	47.454	-3.39981	0.810491	-4.19475	2.73174e-05	0.000139432	tetratricopeptide repeat protein 21b
Smp_016780	133.645	-1.98913	0.474836	-4.1891	2.80066e-05	0.000142872	alpha tubulin
Smp_164560	47.4392	1.99289	0.476025	4.18652	2.83268e-05	0.000144389	hypothetical protein
Smp_094190	47.3149	-3.00519	0.717836	-4.18645	2.83349e-05	0.000144389	serine:threonine protein kinase NIM1
Smp_121320	54.9656	-2.3375	0.558537	-4.18504	2.85118e-05	0.000145212	hypothetical protein
Smp_140620	27.6299	-3.40423	0.813622	-4.18404	2.86369e-05	0.00014577	G protein coupled receptor fragment
Smp_211310	43.578	-3.26229	0.779818	-4.1834	2.87182e-05	0.000146104	soluble guanylate cyclase gcy
Smp_050310	3.96017	4.87728	1.16633	4.18173	2.89298e-05	0.0001471	DNA repair and recombination protein RAD54B
Smp_166190	71.7071	-3.50013	0.837429	-4.17961	2.92007e-05	0.000148397	nucleolysin TIA 1 p40
Smp_123810	11.6445	-4.33014	1.03612	-4.17919	2.92547e-05	0.000148591	interferon regulatory factor 2 binding protein
Smp_180890	143.173	1.9959	0.477773	4.1775	2.94734e-05	0.000149621	Rho GTPase activating protein 19
Smp_148460	179.625	-2.97672	0.71266	-4.17692	2.95478e-05	0.000149917	neurofibromin
Smp_157140	137.931	1.94539	0.465805	4.17641	2.9615e-05	0.000150176	Nucleolar pre ribosomal associated protein 1
Smp_173960	72.1814	-2.28541	0.547393	-4.17508	2.97884e-05	0.000150974	AMP deaminase 2
Smp_170840	5.77412	4.39845	1.05382	4.17381	2.99545e-05	0.000151734	alpha galactosidase:alpha n
Smp_124050	89.948	-1.63346	0.391379	-4.17361	2.99808e-05	0.000151785	venom allergen-like (VAL) 6 protein
Smp_136330	34.0854	-3.40577	0.817084	-4.1682	3.07012e-05	0.000155348	liprin alpha 2
Smp_133300	363.798	0.884644	0.212274	4.16746	3.08018e-05	0.000155773	5' 3' exoribonuclease 2
Smp_102390	7.87214	-4.67427	1.12188	-4.16645	3.09378e-05	0.000156376	hypothetical protein
Smp_078750	1736.15	-1.08327	0.260023	-4.16606	3.09907e-05	0.000156559	tetraspanin 97e
Smp_198560	15.4841	-3.09608	0.743315	-4.16523	3.11043e-05	0.000157048	neutral sphingomyelinase
Smp_007550	583.297	1.4437	0.346768	4.16331	3.13661e-05	0.000158285	leukotriene A 4 hydrolase
Smp_161330	81.4808	-2.70153	0.649238	-4.16107	3.16754e-05	0.00015976	PIH1 domain containing protein 2
Smp_139770	37.6726	-3.16004	0.759658	-4.15982	3.18494e-05	0.000160551	hypothetical protein
Smp_154740	23.1525	-2.93777	0.706301	-4.15937	3.19124e-05	0.000160782	tubulin polyglutamylase complex subunit 2
Smp_083240	319.516	-1.42594	0.342863	-4.15891	3.19764e-05	0.000161017	hypothetical protein
Smp_068340	1117.1	-1.13903	0.27404	-4.15644	3.23243e-05	0.000162682	hypothetical protein
Smp_038510	3314.2	1.42095	0.341955	4.15537	3.24766e-05	0.00016336	60s ribosomal protein l6
Smp_144370	36.021	-2.90204	0.698616	-4.15399	3.26727e-05	0.000164258	leucine rich repeat containing protein 71
Smp_176490	282.988	1.80337	0.434214	4.15317	3.279e-05	0.00016476	hypothetical protein
Smp_174540	29.0061	-3.46601	0.83537	-4.14907	3.33828e-05	0.000167648	family M1 non peptidase ue (M01 family)
Smp_178650	27.8011	-2.99995	0.723267	-4.14778	3.35715e-05	0.000168505	hypothetical protein
Smp_008850	23.6526	-2.77976	0.670863	-4.14356	3.41957e-05	0.000171547	fmrfamide receptor
Smp_014280	300.28	1.36188	0.328688	4.14339	3.4221e-05	0.000171582	UDP GlcNAc:betaGal
Smp_152080	35.1623	1.6764	0.405212	4.1371	3.51722e-05	0.000176256	hypothetical protein
Smp_130330	171.525	1.85965	0.449834	4.13408	3.56376e-05	0.000178493	hypothetical protein
Smp_200020	21.8536	-2.80597	0.678885	-4.13321	3.57736e-05	0.000179078	FAD NAD binding oxidoreductase
Smp_187740	7.36405	-3.56006	0.861701	-4.13143	3.60509e-05	0.00018037	forkhead box protein j1 b
Smp_063330	808.34	-1.30154	0.315086	-4.13074	3.61598e-05	0.000180818	hypothetical protein
Smp_062620	62.9817	1.27271	0.308144	4.13024	3.6239e-05	0.000181117	hypothetical protein
Smp_178700	414.047	1.18582	0.287163	4.12944	3.63641e-05	0.000181646	histone acetyltransferase type B catalytic
Smp_084950	13.6874	2.61771	0.634237	4.12734	3.66982e-05	0.000183217	protein regulator of cytokinesis 1
Smp_116360	928.419	0.971733	0.235473	4.12673	3.67957e-05	0.000183606	histone lysine N methyltransferase SETD2
Smp_168920	221.804	1.15311	0.279634	4.12363	3.72945e-05	0.000185996	WD repeat domain 36
Smp_104470	704.041	1.08312	0.262772	4.12188	3.7579e-05	0.000187315	lysyl tRNA synthetase
Smp_105910	656.789	1.18525	0.287676	4.1201	3.78703e-05	0.000188666	Histone Acetyltransferase, CBP/p300 family
Smp_132550	38.2775	-3.04036	0.737974	-4.11987	3.79084e-05	0.000188755	centrosomal protein POC5
Smp_045500	50.2912	-2.26159	0.549376	-4.11665	3.84419e-05	0.00019131	annexin
Smp_010720	28.6964	-1.7543	0.426212	-4.11602	3.85476e-05	0.000191734	elongation of fatty acids protein 1
Smp_114540	22.349	-2.73198	0.663963	-4.11465	3.87759e-05	0.000192768	hypothetical protein
Smp_130680	610.282	1.26769	0.30816	4.11375	3.89279e-05	0.00019342	DNA directed RNA polymerase II subunit RPB2
Smp_153660	99.1912	2.26287	0.550193	4.11286	3.90781e-05	0.000194064	G1:S specific cyclin D2
Smp_148560	400.098	1.16792	0.284043	4.11177	3.92635e-05	0.000194881	MMP37 protein, mitochondrial like
Smp_201150	45.6602	2.27552	0.553495	4.11118	3.93641e-05	0.000195277	Equilibrative nucleoside transporter 1
Smp_169920	141.338	1.92516	0.468477	4.10941	3.96678e-05	0.000196477	Translation machinery associated protein
Smp_004310	4126.26	-1.47546	0.359045	-4.1094	3.96691e-05	0.000196477	ATPase, H+ transporting, lysosomal, V0 subunit
Smp_153390	217.015	-2.05006	0.498862	-4.10947	3.96573e-05	0.000196477	Nucleotide pyrophosphatase:phosphodiesterase 5
Smp_156640	12.9764	-3.82132	0.930938	-4.1048	4.04659e-05	0.000200318	potassium voltage gated channel subfamily C
Smp_162390	8.51978	-3.67698	0.895857	-4.10443	4.0532e-05	0.000200539	hypothetical protein
Smp_064510	839.96	0.956652	0.233323	4.10012	4.12943e-05	0.000204203	RNA binding protein NOB1
Smp_000080	267.738	-1.02528	0.25008	-4.0998	4.13506e-05	0.000204263	SNARE complex protein
Smp_174180	153.16	-1.49151	0.363805	-4.09975	4.13588e-05	0.000204263	hypothetical protein
Smp_089200	97.8922	-2.31357	0.564329	-4.09968	4.13719e-05	0.000204263	multidrug resistance protein
Smp_157740	261.642	1.57632	0.38453	4.09935	4.14312e-05	0.000204448	DNA directed RNA polymerase III subunit RPC1
Smp_063350	994.313	1.75412	0.428031	4.09812	4.16515e-05	0.000205427	ribosomal protein L27
Smp_139900	92.8509	-1.35841	0.331732	-4.09489	4.22364e-05	0.000208202	lysophosphatidic acid phosphatase type 6
Smp_178850	1066.05	1.01549	0.248105	4.09301	4.2581e-05	0.00020979	poly(A) polymerase
Smp_128210	34.3919	4.23143	1.03417	4.09164	4.28331e-05	0.000210921	claspin protein
Smp_141000	554.815	0.634027	0.15497	4.09128	4.28993e-05	0.000211136	interleukin enhancer binding factor 2
Smp_062080	69.7793	1.47726	0.361165	4.09027	4.30867e-05	0.000211947	serine protease inhibitors serpins
Smp_142390	32.0845	-2.66041	0.650853	-4.08758	4.35894e-05	0.000214307	innexin unc 9
Smp_146110	320.895	0.89584	0.219177	4.0873	4.36426e-05	0.000214456	DNA directed RNA polymerase III subunit RPC3
Smp_143260	69.5822	-2.26011	0.55348	-4.08346	4.43704e-05	0.000217918	hypothetical protein
Smp_187090	14.242	-3.48673	0.853947	-4.08307	4.44437e-05	0.000218163	hypothetical protein
Smp_126250	5.67806	-3.92173	0.961051	-4.08067	4.4906e-05	0.000220317	tetratricopeptide repeat protein 21b
Smp_133570	17.8491	-4.00306	0.98122	-4.07967	4.50989e-05	0.000221147	hypothetical protein
Smp_152540	7.84535	-4.64576	1.13886	-4.07929	4.51727e-05	0.000221394	muscarinic acetylcholine receptor
Smp_128010	21.3366	-3.13436	0.769055	-4.0756	4.5895e-05	0.000224816	hypothetical protein
Smp_079730	391.062	1.31923	0.323759	4.07472	4.60696e-05	0.000225553	cleavage stimulation factor, 3' pre RNA, subunit
Smp_127790	13.1945	-3.71102	0.911013	-4.07351	4.63104e-05	0.000226613	hypothetical protein
Smp_156570	171.209	1.17262	0.288149	4.06948	4.71191e-05	0.00023045	WD repeat containing protein 74
Smp_058400	488.99	1.22291	0.30067	4.0673	4.75619e-05	0.000232495	protein smg9
Smp_063760	124.456	1.2223	0.300592	4.0663	4.77647e-05	0.000233242	hypothetical protein
Smp_065470	751.09	-0.874973	0.215173	-4.06637	4.77503e-05	0.000233242	tumor protein d52
Smp_155010	41.8092	-3.32492	0.817915	-4.06511	4.80092e-05	0.000234276	forkhead box protein J3
Smp_094930	4.32095	-4.51681	1.11114	-4.06503	4.80265e-05	0.000234276	early growth response protein 1
Smp_145370	490.923	1.62796	0.400536	4.06445	4.81463e-05	0.000234738	hypothetical protein
Smp_126900	13.4868	-4.05405	0.997716	-4.06333	4.83779e-05	0.000235745	voltage gated hydrogen channel 1
Smp_136410	146.888	-1.84618	0.454558	-4.06148	4.87621e-05	0.000237493	cytoplasmic polyadenylation element binding
Smp_138150	159.678	1.9619	0.483122	4.06088	4.88886e-05	0.000237986	rho type gtpase activating protein
Smp_135130	30.6787	-2.95666	0.72825	-4.05995	4.90835e-05	0.00023881	hypothetical protein
Smp_031100	311.727	-1.24385	0.306481	-4.05849	4.9392e-05	0.000240186	liquid facets
Smp_173390	212.892	0.780321	0.192358	4.0566	4.97918e-05	0.000242005	DnaJ protein subfamily C
Smp_163240	41.2432	2.40681	0.593387	4.05606	4.99081e-05	0.000242444	t box transcription factor tbx2
Smp_200330	194.78	0.764777	0.188577	4.05552	5.00235e-05	0.000242753	threonyl tRNA synthetase
Smp_036010	87.0066	-2.21788	0.546866	-4.05561	5.00028e-05	0.000242753	magnesium transporter nipa2
Smp_077400	758.539	-0.953526	0.235276	-4.05279	5.061e-05	0.000245472	autophagy protein 3
Smp_024650	4.83654	-4.58753	1.13228	-4.0516	5.08691e-05	0.0002466	beta 1,4 galactosyltransferase 4
Smp_147060	6.99066	-4.21227	1.04002	-4.0502	5.11746e-05	0.000247953	hypothetical protein
Smp_148180	3.83738	-4.59038	1.13403	-4.04786	5.16873e-05	0.000250308	hypothetical protein
Smp_150880	17.8446	-3.90282	0.96453	-4.04634	5.20236e-05	0.000251806	hypothetical protein
Smp_002810	149.123	2.15807	0.533446	4.04552	5.22067e-05	0.000252548	fidgetin protein 1
Smp_020060	379.641	1.07437	0.265578	4.04541	5.22309e-05	0.000252548	nudC domain containing protein 1
Smp_103140	52.5394	-2.69779	0.667018	-4.04456	5.24211e-05	0.000253337	alpha tubulin
Smp_072190	2850.47	-1.38339	0.342103	-4.04378	5.25956e-05	0.000254049	membrane associated protein 29
Smp_167440	14.0874	-3.86854	0.956839	-4.04305	5.2761e-05	0.000254717	hypothetical protein
Smp_151410	28.1466	3.09445	0.765516	4.0423	5.29292e-05	0.000255397	protein phosphatase 7
Smp_068480	273.539	-1.19667	0.296122	-4.04114	5.31915e-05	0.00025653	vesicle transport through interaction with
Smp_193120	18.9075	-3.28203	0.812408	-4.03988	5.34796e-05	0.000257787	myosin heavy chain
Smp_022660	590.824	0.983341	0.243461	4.03901	5.36781e-05	0.000258611	glutamate rich WD repeat containing 1
Smp_210310	582.4	1.61913	0.400986	4.03786	5.39408e-05	0.000259609	ribosomal protein l7a
Smp_137840	142.264	-1.38376	0.342692	-4.0379	5.39323e-05	0.000259609	hypothetical protein
Smp_034840	11425.1	-1.13291	0.280599	-4.03748	5.40283e-05	0.000259804	14-3-3 protein epsilon
Smp_008710	128.166	-2.3021	0.570187	-4.03744	5.40368e-05	0.000259804	leucine rich repeat containing protein
Smp_147550	5.72278	-4.23347	1.04864	-4.03711	5.41126e-05	0.000260035	twik family of potassium channels
Smp_155970	44.5284	-3.82512	0.947557	-4.03682	5.41802e-05	0.000260226	Two pore potassium channel protein sup 9
Smp_049240	45.6337	2.32816	0.577033	4.0347	5.46718e-05	0.000262453	major egg antigen
Smp_148300	9.59506	-4.51285	1.11973	-4.03032	5.57018e-05	0.00026726	protocadherin 17
Smp_022850	645.088	0.588663	0.146077	4.02982	5.58204e-05	0.000267692	mitochondrial ribosomal protein s31
Smp_041550	163.99	-1.72221	0.42766	-4.02705	5.64822e-05	0.000270727	hypothetical protein
Smp_151110	240.736	1.27537	0.316716	4.02686	5.65268e-05	0.000270802	hypothetical protein
Smp_038240	299.25	1.4094	0.350412	4.02213	5.7675e-05	0.000276161	Alanyl tRNA synthetase
Smp_124080	12.4009	-3.47713	0.864865	-4.02044	5.80905e-05	0.000278009	calcium activated potassium channel subunit
Smp_087810	610.609	1.20046	0.298642	4.01974	5.82628e-05	0.000278691	nucleolar GTP binding protein 2
Smp_056080	5.33112	-4.01542	0.999025	-4.01934	5.83608e-05	0.000279017	rhodopsin orphan GPCR
Smp_175100	404.254	-0.841121	0.209332	-4.01813	5.86618e-05	0.000280313	#N/A
Smp_076320	9.98871	3.78824	0.943031	4.01709	5.89205e-05	0.000281405	hypothetical protein
Smp_174420	146.596	1.33162	0.331903	4.01206	6.01911e-05	0.000287327	hypothetical protein
Smp_163580	1136.15	-0.946624	0.236102	-4.00939	6.08768e-05	0.000290452	rab family
Smp_045250	183.902	1.49404	0.372659	4.00912	6.0945e-05	0.00029063	cleavage stimulation factor subunit 1
Smp_083730	3275.67	1.18026	0.294416	4.00881	6.1026e-05	0.000290868	hypothetical protein
Smp_155550	210.821	1.10365	0.275326	4.00853	6.10979e-05	0.000291063	serine protease inhibitors serpins
Smp_196930	4.77347	-4.40071	1.09792	-4.00822	6.11772e-05	0.000291292	WNT
Smp_169570	81.5588	-1.83703	0.45834	-4.00801	6.12334e-05	0.000291411	glycerol 3 phosphate dehydrogenase
Smp_036570	172.889	1.25402	0.313082	4.0054	6.19114e-05	0.000294488	cobw domain containing protein
Smp_151020	156.687	-1.75742	0.438987	-4.00336	6.24494e-05	0.000296896	transmembrane protein 17
Smp_022890	52.8662	-3.69824	0.924137	-4.00183	6.28547e-05	0.000298672	hypothetical protein
Smp_052810	401.554	1.03406	0.258419	4.00147	6.29514e-05	0.000298979	glucose 6 phosphate 1 dehydrogenase
Smp_200290	5.20685	-4.21904	1.05533	-3.99783	6.39264e-05	0.000303456	hypothetical protein
Smp_024850	1537.98	1.44966	0.362832	3.9954	6.45856e-05	0.00030643	60S ribosomal protein L17
Smp_048240	436.652	-0.846499	0.211923	-3.99436	6.48684e-05	0.000307615	mannose 1 phosphate guanyltransferase
Smp_180810	140.424	-2.14195	0.536417	-3.99307	6.52235e-05	0.000309143	Papilin
Smp_165390	25.3752	-3.26115	0.816906	-3.99207	6.54991e-05	0.000310292	ccaat box dna binding protein subunit
Smp_163040	73.1648	2.13843	0.536131	3.98863	6.64564e-05	0.000314668	nuclear pore complex protein Nup205
Smp_176710	78.5254	3.537	0.886874	3.98816	6.65866e-05	0.000315125	transcriptional factor nfil3:e4bp4
Smp_066890	2273.19	1.5734	0.39456	3.98773	6.67087e-05	0.000315384	40S ribosomal protein S10
Smp_212420	181.223	-2.99159	0.750185	-3.9878	6.66894e-05	0.000315384	SH3 domain containing kinase binding protein 1
Smp_023860	6.22047	4.61714	1.15799	3.9872	6.68574e-05	0.000315609	hypothetical protein
Smp_194830	48.4867	-2.23134	0.559607	-3.98733	6.68201e-05	0.000315609	SmKK7
Smp_142670	39.3776	-2.96298	0.743115	-3.98725	6.68447e-05	0.000315609	intraflagellar transport protein 46
Smp_173980	6.50958	-3.70058	0.928593	-3.98515	6.74378e-05	0.000318188	#N/A
Smp_203100	31.5377	2.35239	0.59046	3.984	6.77645e-05	0.000319569	hypothetical protein
Smp_202880	9.55622	-3.72867	0.936625	-3.98096	6.86361e-05	0.000323516	iroquois class homeodomain protein IRX 4
Smp_141310	13.826	-3.08647	0.775538	-3.97978	6.89804e-05	0.000324975	neurexin 2 alpha
Smp_115450	573.997	0.844933	0.21241	3.97784	6.95439e-05	0.000327465	hypothetical protein
Smp_071140	949.004	-0.840198	0.211282	-3.97666	6.989e-05	0.000328925	adducin related protein
Smp_143810	33.1109	-3.36126	0.845272	-3.97654	6.99241e-05	0.000328925	hypothetical protein
Smp_038530	78.8622	-2.2068	0.5551	-3.9755	7.0231e-05	0.000330202	dual specificity protein phosphatase 14
Smp_138680	869.286	0.91066	0.229119	3.97462	7.04924e-05	0.000331099	DNAj subfamily C member
Smp_159560	27.9582	-3.3876	0.852306	-3.97463	7.04898e-05	0.000331099	GATA binding factor 2
Smp_056700	102.503	-2.63016	0.661796	-3.97428	7.05939e-05	0.000331409	membrane associated RING finger protein
Smp_157350	86.7789	-2.02129	0.508762	-3.97295	7.09886e-05	0.000333095	serine:threonine protein kinase ULK2
Smp_152830	54.8212	-3.24922	0.817946	-3.97242	7.11471e-05	0.000333671	sodium calcium exchanger
Smp_166430	123.462	1.60925	0.405452	3.96902	7.21674e-05	0.000338287	Nuclear cap binding protein subunit 2
Smp_167950	142.814	-0.833538	0.210103	-3.96728	7.26989e-05	0.000340608	hypothetical protein
Smp_178420	20.6625	2.85901	0.72096	3.96557	7.32214e-05	0.000342884	amine GPCR
[truncated: 8,832 more rows]

## Sheet: TSP-2_v_Neo_DESeq2.csv
	baseMean	log2FoldChange	lfcSE	stat	pvalue	padj
Smp_163720	768.542	7.76521	0.312365	24.8594	2.04405e-136	1.87664e-132	endophilin B1
Smp_135530	5193.73	7.70265	0.342126	22.5141	3.02056e-112	1.38659e-108	leishmanolysin peptidase
Smp_176940	972.545	8.5599	0.393273	21.7658	4.89467e-105	1.49793e-101	cationic amino acid transporter
Smp_053640	1240.04	6.69525	0.314756	21.2712	2.09664e-100	4.81231e-97	hypothetical protein
Smp_148080	1215.18	9.32125	0.439225	21.222	5.9769e-100	1.09748e-96	hypothetical protein
Smp_058320	1808.51	-2.91567	0.139055	-20.9679	1.28951e-97	1.97316e-94	nuclear autoantigenic sperm protein
Smp_051810	1563.35	5.29048	0.253383	20.8794	8.24222e-97	1.08103e-93	elongation of very long chain fatty acids
Smp_040680	1133.13	9.27769	0.458482	20.2357	4.7504e-91	5.45167e-88	dynein light chain
Smp_147670	516.726	9.01437	0.454039	19.8537	1.02302e-87	1.04359e-84	Receptor kinase I-interacting protein SIP
Smp_122630	1249.32	9.84364	0.499931	19.69	2.62819e-86	2.41294e-83	MEG 1
Smp_158890	747.56	9.39997	0.519055	18.1098	2.66795e-73	2.22677e-70	MEG 16
Smp_081900	1125.77	6.35351	0.359174	17.6892	5.0763e-70	3.88379e-67	hypothetical protein
Smp_132740	2089.74	8.47134	0.490204	17.2813	6.51017e-67	4.59768e-64	fatty acid desaturase 2
Smp_200180	680.187	7.32233	0.433525	16.8902	5.31014e-64	3.48231e-61	dynein light chain
Smp_166860	995.753	9.71553	0.577244	16.8309	1.4493e-63	8.87067e-61	hypothetical protein
Smp_090080	2159.38	4.66497	0.280859	16.6097	5.93234e-62	3.30216e-59	Estrogen regulated protein EP45
Smp_210790	2172.98	4.02512	0.242362	16.6079	6.11445e-62	3.30216e-59	transmembrane BAX inhibitor motif containing
Smp_037780	394.573	4.3681	0.26386	16.5546	1.48246e-61	7.56135e-59	hypothetical protein
Smp_163710	2040.84	7.88104	0.479413	16.4389	1.00655e-60	4.86375e-58	MEG 6
Smp_156930	399.721	9.2856	0.572168	16.2288	3.1558e-59	1.44867e-56	hypothetical protein
Smp_171860	709.531	5.16897	0.31953	16.1768	7.35015e-59	3.21342e-56	hypothetical protein
Smp_151010	379.945	4.99175	0.309108	16.1489	1.15628e-58	4.82536e-56	monocarboxylate transporter
Smp_197730	339.844	5.11661	0.317547	16.1129	2.07114e-58	8.26745e-56	rrm containing protein seb 4
Smp_035290	245.935	8.89421	0.55689	15.9712	2.0283e-57	7.7591e-55	hypothetical protein
Smp_138470	962.483	-3.8959	0.245587	-15.8636	1.1317e-56	4.15604e-54	hypothetical protein
Smp_097500	359.704	5.66693	0.358805	15.7939	3.42589e-56	1.20973e-53	hypothetical protein
Smp_164170	675.439	7.77978	0.493884	15.7522	6.62812e-56	2.25381e-53	endoglycoceramidase
Smp_094140	737.245	-5.55885	0.353183	-15.7393	8.13792e-56	2.66837e-53	DNA replication licensing factor MCM6
Smp_187070	317.788	7.41482	0.471982	15.71	1.29264e-55	4.09233e-53	hypothetical protein
Smp_151440	427.909	9.92843	0.633908	15.6622	2.74051e-55	8.17264e-53	hypothetical protein
Smp_195040	188.837	5.92918	0.378576	15.6618	2.75952e-55	8.17264e-53	plastin 2
Smp_169460	228.488	8.00962	0.51171	15.6527	3.18637e-55	9.14188e-53	RAB18, member RAS oncogene family
Smp_063330	808.34	4.88857	0.312404	15.6482	3.41656e-55	9.50527e-53	hypothetical protein
Smp_155620	449.68	4.50477	0.288202	15.6306	4.50285e-55	1.2159e-52	hypothetical protein
Smp_045200	199.257	6.0815	0.390766	15.563	1.29782e-54	3.40438e-52	tegument-allergen-like protein
Smp_212790	304.29	8.5662	0.556829	15.3839	2.09924e-53	5.35365e-51	histone deacetylase, putative
Smp_073450	225.323	4.94216	0.321505	15.3719	2.52518e-53	6.26586e-51	hypothetical protein
Smp_129350	181.297	6.21228	0.406416	15.2855	9.55101e-53	2.30757e-50	ras and EF hand domain containing protein
Smp_146970	588.823	5.68931	0.373744	15.2225	2.50838e-52	5.90499e-50	PCTP protein like
Smp_181530	767.511	7.21831	0.477279	15.1239	1.12667e-51	2.586e-49	cd63 antigen
Smp_053900	323.174	4.51282	0.299421	15.0718	2.48222e-51	5.55836e-49	beta hexosaminidase subunit beta
Smp_176450	443.17	9.88184	0.656477	15.0528	3.30703e-51	7.22901e-49	ATP binding cassette sub family A
Smp_002150	430.801	4.96393	0.330146	15.0356	4.29346e-51	9.16703e-49	trypsin-like serine protease
Smp_201060	547.384	5.1424	0.342164	15.0291	4.73721e-51	9.88462e-49	dynein light chain
Smp_098710	274.757	4.01847	0.267646	15.0141	5.93239e-51	1.21034e-48	quiescin q6 sulfhydryl oxidase
Smp_079010	1982.99	4.09432	0.273289	14.9816	9.68019e-51	1.93204e-48	cAMP dependent protein kinase type II regulatory
Smp_200240	615.965	4.32598	0.290228	14.9055	3.03704e-50	5.93257e-48	universal stress protein
Smp_149320	358.897	4.67374	0.315481	14.8147	1.17787e-49	2.25293e-47	tricarboxylate transport protein
Smp_176650	549.295	7.06686	0.477524	14.799	1.48764e-49	2.78735e-47	hypothetical protein
Smp_190970	237.309	5.4618	0.37052	14.7409	3.5216e-49	6.46637e-47	phosphatidylcholine transfer protein
Smp_073300	679.353	-5.48772	0.372547	-14.7303	4.11978e-49	7.41642e-47	Chaperone protein DnaJ 1
Smp_057590	623.379	-4.66394	0.316731	-14.7253	4.43696e-49	7.8338e-47	hypothetical protein
Smp_095910	1643.29	3.34969	0.227644	14.7146	5.19666e-49	9.002e-47	signal recognition particle receptor subunit
Smp_140330	358.625	4.46623	0.30521	14.6333	1.72217e-48	2.928e-46	epsin 4:enthoprotin
Smp_091870	502.764	7.32452	0.500715	14.6281	1.85877e-48	3.1028e-46	hypothetical protein
Smp_071390	1687.25	3.5393	0.242089	14.6198	2.09943e-48	3.44194e-46	adenylate kinase
Smp_200190	685.934	4.15223	0.285239	14.557	5.27068e-48	8.4895e-46	lung cancer oncogene 5
Smp_163820	250.64	8.68455	0.597566	14.5332	7.464e-48	1.1815e-45	phospholipid transporting ATPase IF
Smp_087010	256.296	-3.81665	0.264575	-14.4256	3.57227e-47	5.55881e-45	DNA polymerase delta catalytic subunit
Smp_171720	1269.65	3.61513	0.251661	14.3651	8.57151e-47	1.31158e-44	lipid phosphate phosphohydrolase 1
Smp_045360	745.13	6.44281	0.448545	14.3638	8.73119e-47	1.31412e-44	calsyntenin 2
Smp_037230	987.602	5.58594	0.389159	14.3539	1.00759e-46	1.49205e-44	fimbrin
Smp_194980	487.749	6.19048	0.43257	14.311	1.86929e-46	2.72411e-44	25 kDa integral membrane protein
Smp_059600	327.942	7.47227	0.522246	14.3079	1.95218e-46	2.80046e-44	tektin 3
Smp_187010	234.88	6.14351	0.429718	14.2966	2.29692e-46	3.24431e-44	hypothetical protein
Smp_133600	1161.2	4.68805	0.328695	14.2626	3.74231e-46	5.20578e-44	hypothetical protein
Smp_085410	184.928	6.43226	0.452084	14.228	6.1381e-46	8.41102e-44	Transmembrane protein 45B
Smp_199070	438.182	-4.71422	0.332001	-14.1994	9.23858e-46	1.24734e-43	DNA mismatch repair protein MSH2
Smp_140240	233.758	-6.33336	0.447232	-14.1613	1.59134e-45	2.11741e-43	hypothetical protein
Smp_174910	1814.08	-4.78549	0.34095	-14.0358	9.41822e-45	1.23527e-42	importin subunit alpha 2
Smp_188780	203.767	8.36019	0.598614	13.9659	2.51716e-44	3.25494e-42	hypothetical protein
Smp_147420	128.199	5.65047	0.407474	13.8671	1.00266e-43	1.27853e-41	pro neuregulin membrane bound
Smp_213750	362.587	4.44742	0.323339	13.7547	4.77513e-43	6.00555e-41	putative sugar transporter
Smp_099800	2070.58	5.5206	0.401887	13.7367	6.12055e-43	7.59362e-41	#N/A
Smp_121460	200.451	-4.9994	0.365163	-13.6909	1.15106e-42	1.40905e-40	hypothetical protein
Smp_141160	150.561	-6.36607	0.466502	-13.6464	2.12134e-42	2.56263e-40	E3 ubiquitin protein ligase RNF168
Smp_078400	499.196	3.63361	0.266881	13.6151	3.25611e-42	3.88238e-40	N acetylgalactosamine kinase
Smp_155890	131.15	4.81826	0.354345	13.5976	4.13576e-42	4.868e-40	alkaline phosphatase
Smp_167000	115.586	3.7596	0.278858	13.4821	1.99277e-41	2.3159e-39	centrosomal protein of 19 kDa
Smp_056350	177.65	-5.59733	0.416173	-13.4495	3.09852e-41	3.55594e-39	mitotic spindle assembly checkpoint protein
Smp_181470	256.512	6.33819	0.472599	13.4113	5.18991e-41	5.88254e-39	NMDA receptor glutamate binding chain
Smp_095520	288.738	4.54783	0.340097	13.3722	8.79477e-41	9.84693e-39	dynein light chain
Smp_153550	238.442	4.7365	0.357708	13.2412	5.07169e-40	5.61003e-38	hypothetical protein
Smp_093780	186.451	6.64238	0.502264	13.2249	6.30235e-40	6.88831e-38	peroxiredoxins, prx 1, prx 2, prx 3
Smp_168730	275.409	3.67574	0.277963	13.2239	6.38979e-40	6.90173e-38	carbonic anhydrase
Smp_082490	829.963	-6.17845	0.470122	-13.1422	1.88593e-39	2.01333e-37	G2:mitotic specific cyclin B2
Smp_000820	455.124	4.82412	0.367766	13.1174	2.61881e-39	2.7636e-37	hypothetical protein
Smp_140510	818.604	3.93724	0.300917	13.0841	4.05729e-39	4.23295e-37	TLC domain containing protein 2
Smp_009600	372.247	-6.13093	0.468772	-13.0787	4.35925e-39	4.49688e-37	serine:threonine protein kinase PLK1
Smp_145920	193.266	7.52022	0.575141	13.0754	4.54933e-39	4.64082e-37	protein tyrosine sulfotransferase
Smp_099810	137.858	4.53868	0.347298	13.0686	4.97988e-39	5.02421e-37	telomerase protein component
Smp_164950	265.364	-4.92664	0.378871	-13.0035	1.16917e-38	1.16675e-36	hypothetical protein
Smp_141610	3185.9	4.63371	0.357609	12.9575	2.13167e-38	2.1044e-36	cathepsin b
Smp_032500	594.208	-4.79169	0.369933	-12.9528	2.26394e-38	2.2112e-36	DNA replication licensing factor MCM7
Smp_127710	368.792	7.72908	0.599402	12.8946	4.8251e-38	4.66308e-36	hypothetical protein
Smp_131370	197.593	9.49231	0.738561	12.8524	8.33335e-38	7.96963e-36	hypothetical protein
Smp_082740	286.17	3.64213	0.283483	12.8478	8.84753e-38	8.37414e-36	Na(+):H(+) exchange regulatory cofactor
Smp_132950	158.747	-6.16207	0.479949	-12.839	9.91212e-38	9.28604e-36	hypothetical protein
Smp_147970	162.916	-4.63311	0.361936	-12.8009	1.62048e-37	1.50279e-35	kinesin protein KIF14
Smp_017420	93.2627	6.10725	0.478485	12.7637	2.61344e-37	2.3994e-35	voltage gated hydrogen channel 1
Smp_000660	510.082	4.27454	0.335435	12.7433	3.39776e-37	3.0886e-35	ornithine aminotransferase
Smp_072560	260.969	-6.48024	0.509037	-12.7304	4.00823e-37	3.6078e-35	hypothetical protein
Smp_158620	272.8	4.75235	0.373876	12.711	5.13488e-37	4.57702e-35	retinaldehyde binding protein
Smp_167880	387.573	-3.26564	0.257691	-12.6727	8.37519e-37	7.39352e-35	Acidic repeat containing protein
Smp_167660	343.957	4.71773	0.376206	12.5403	4.49305e-36	3.92864e-34	Protein phosphatase 1 regulatory subunit 3B
Smp_086220	177.737	-5.76513	0.460034	-12.532	4.98995e-36	4.32195e-34	hypothetical protein
Smp_015030	155.403	4.82052	0.385848	12.4933	8.11973e-36	6.96703e-34	ethanolamine kinase 1
Smp_016870	261.077	-6.75238	0.541606	-12.4673	1.12513e-35	9.56463e-34	protein regulator of cytokinesis 1
Smp_051660	365.652	4.03351	0.323771	12.4579	1.26666e-35	1.0669e-33	hypothetical protein
Smp_161030	281.911	4.64153	0.373504	12.427	1.86529e-35	1.55684e-33	hypothetical protein
Smp_097810	754.882	2.5455	0.204882	12.4242	1.9303e-35	1.59658e-33	Ubiquitin thioesterase otubain protein
Smp_093160	280.308	6.76886	0.546122	12.3944	2.80189e-35	2.2968e-33	STARP antigen
Smp_114660	529.514	4.57148	0.368868	12.3933	2.84223e-35	2.30925e-33	hypothetical protein
Smp_065150	246.813	-4.85608	0.392436	-12.3742	3.60469e-35	2.90304e-33	N acetyltransferase ESCO2
Smp_176300	96.4302	5.96858	0.488483	12.2186	2.47347e-34	1.97469e-32	dynein heavy chain
Smp_086530	300.97	4.44694	0.364111	12.2132	2.64417e-34	2.09277e-32	tegument-allergen-like protein
Smp_011830	304.393	4.75498	0.390023	12.1915	3.44892e-34	2.70637e-32	hypothetical protein
Smp_009030	1145.96	-2.97693	0.244478	-12.1767	4.13807e-34	3.21963e-32	ribonucleoside diphosphate reductase large
Smp_124230	163.027	-5.64355	0.465549	-12.1224	8.0413e-34	6.20396e-32	dna repair protein rad51 1
Smp_144960	416.523	5.03706	0.416093	12.1056	9.86493e-34	7.54749e-32	FTS and Hook interacting protein
Smp_194860	1067.62	4.57811	0.380033	12.0466	2.02126e-33	1.53365e-31	hypothetical protein
Smp_128200	326.527	-6.7523	0.561884	-12.0173	2.88359e-33	2.17002e-31	kinesin protein kif23
Smp_043220	1274.54	2.99258	0.249339	12.0021	3.46553e-33	2.58675e-31	hypothetical protein
Smp_123270	565.671	4.84536	0.403735	12.0013	3.49586e-33	2.58834e-31	Sj Ts1
Smp_010280	468.714	3.14477	0.262644	11.9735	4.89097e-33	3.59232e-31	monoacylglycerol lipase abhd12
Smp_081430	104.055	5.72506	0.478288	11.9699	5.10811e-33	3.72203e-31	retinol dehydrogenase 11
Smp_158100	209.592	5.44604	0.455877	11.9463	6.78882e-33	4.90773e-31	hypothetical protein
Smp_141680	346.588	4.7597	0.398837	11.9339	7.87481e-33	5.64833e-31	fasciclin domain containing protein
Smp_172480	401.609	-3.07518	0.25808	-11.9156	9.81743e-33	6.98712e-31	Krueppel factor 10 like
Smp_037590	928.66	-4.34925	0.365686	-11.8934	1.28078e-32	9.04523e-31	dna replication licensing factor mcm3
Smp_201030	295.882	4.16043	0.350018	11.8863	1.39392e-32	9.76916e-31	lung cancer oncogene 5
Smp_089290	140.975	4.04205	0.340261	11.8793	1.51689e-32	1.05504e-30	alpha galactosidase:alpha n
Smp_166340	288.502	5.49397	0.462803	11.8711	1.67291e-32	1.15481e-30	hypothetical protein
Smp_167940	202.43	-4.31785	0.365177	-11.824	2.93434e-32	2.01046e-30	wee1 protein kinase 2
Smp_040350	171.273	-3.80281	0.321749	-11.8192	3.10653e-32	2.11267e-30	DNA binding protein RFX7
Smp_084600	574.161	2.79423	0.236601	11.8099	3.46955e-32	2.3422e-30	solute carrier family 37
Smp_179320	1478.57	-5.91225	0.502678	-11.7615	6.16227e-32	4.12962e-30	Argonaute
Smp_153390	217.015	5.67885	0.483359	11.7487	7.16963e-32	4.76988e-30	Nucleotide pyrophosphatase:phosphodiesterase 5
Smp_033700	228.879	-4.99274	0.425267	-11.7402	7.92577e-32	5.235e-30	deoxyribodipyrimidine photo lyase
Smp_042550	471.393	2.09665	0.178917	11.7186	1.0239e-31	6.71456e-30	sorting nexin 2
Smp_031300	319.845	4.0349	0.345251	11.6868	1.48827e-31	9.69067e-30	universal stress protein
Smp_194050	3106.25	5.159	0.441763	11.6782	1.6472e-31	1.065e-29	Clumping factor A
Smp_118560	110.468	4.98387	0.427143	11.6679	1.8594e-31	1.19378e-29	hypothetical protein
Smp_159440	234.734	5.10831	0.437854	11.6667	1.88607e-31	1.2025e-29	schwannomin interacting protein
Smp_046630	1491.49	4.7364	0.406639	11.6477	2.35786e-31	1.49293e-29	hypothetical protein
Smp_017860	366.642	2.31915	0.200988	11.5387	8.41458e-31	5.29139e-29	hypothetical protein
Smp_103200	634.499	1.8343	0.159243	11.5188	1.06018e-30	6.62142e-29	V type proton ATPase subunit D
Smp_147730	248.846	4.86003	0.423309	11.481	1.64298e-30	1.0192e-28	single kunitz protease inhibitor
Smp_060700	239.827	4.2764	0.372652	11.4756	1.74958e-30	1.07805e-28	adaptor protein complex 1, sigma 2
Smp_120180	251.963	3.06564	0.267208	11.4729	1.80537e-30	1.10501e-28	NAD dependent epimerase:dehydratase
Smp_164550	256.389	4.28664	0.374314	11.452	2.29856e-30	1.39755e-28	hypothetical protein
Smp_140610	292.506	4.85127	0.42379	11.4473	2.4246e-30	1.46449e-28	iron:zinc purple acid phosphatase protein
Smp_133540	105.003	-3.56156	0.312012	-11.4148	3.52773e-30	2.11687e-28	asparagine synthetase domain containing protein
Smp_199090	198.535	5.20382	0.456946	11.3883	4.78413e-30	2.85215e-28	peptidyl glycine alpha amidating
Smp_176260	355.335	-6.10605	0.536881	-11.3732	5.68684e-30	3.36844e-28	hypothetical protein
Smp_105410	180.339	5.29885	0.466507	11.3586	6.72417e-30	3.95735e-28	glucose transport protein
Smp_040020	135.332	-7.16993	0.632978	-11.3273	9.61346e-30	5.62173e-28	histone H3
Smp_203380	207.922	5.35556	0.47421	11.2936	1.4106e-29	8.19663e-28	hypothetical protein
Smp_166300	343.615	4.13856	0.367014	11.2763	1.71805e-29	9.85839e-28	hypothetical protein
Smp_066260	272.549	-4.39937	0.390126	-11.2768	1.70862e-29	9.85839e-28	replication factor C subunit 5
Smp_172530	480.063	-6.14724	0.545956	-11.2596	2.07716e-29	1.1845e-27	DNA replication licensing factor MCM4
Smp_169200	111.779	5.50201	0.4894	11.2424	2.52516e-29	1.43108e-27	tegument-allergen-like protein
Smp_083380	508.15	2.95553	0.263393	11.221	3.21619e-29	1.81153e-27	coiled coil domain containing protein 149
Smp_149260	123.919	-6.14756	0.548641	-11.2051	3.85114e-29	2.15594e-27	kinesin family 1
Smp_167160	112.072	6.17348	0.554004	11.1434	7.7127e-29	4.29153e-27	dynamin binding protein
Smp_052390	166.32	-5.5949	0.503803	-11.1053	1.18182e-28	6.53631e-27	origin recognition complex subunit 5
Smp_187410	76.1661	7.06228	0.636525	11.0951	1.3257e-28	7.28819e-27	hypothetical protein
Smp_157950	177.342	3.98555	0.360191	11.0651	1.85286e-28	1.01257e-26	glycogenin
Smp_162710	260.086	-4.60303	0.416148	-11.061	1.93845e-28	1.05307e-26	serine:threonine protein kinase 6
Smp_156230	160.428	4.40804	0.399074	11.0457	2.30032e-28	1.24231e-26	hypothetical protein
Smp_046500	1614.93	-3.88784	0.353158	-11.0088	3.46729e-28	1.86159e-26	proliferating cell nuclear antigen
Smp_204310	90.3022	5.11477	0.464642	11.008	3.49754e-28	1.86691e-26	hypothetical protein
Smp_045560	661.4	3.6215	0.329575	10.9884	4.34438e-28	2.30554e-26	annexin
Smp_157300	882.924	-4.17815	0.380817	-10.9715	5.2368e-28	2.76316e-26	basic fibroblast growth factor receptor 1 A
Smp_078230	319.445	6.0888	0.555421	10.9625	5.78813e-28	3.03662e-26	cGMP dependent protein kinase, isozyme 2 forms
Smp_002600	393.186	-3.08249	0.281291	-10.9584	6.05738e-28	3.15982e-26	Lysosomal Pro X carboxypeptidase
Smp_080730	697.17	-5.35636	0.489615	-10.94	7.42364e-28	3.85064e-26	cyclin dependent kinase 1
Smp_074710	79.648	5.65754	0.517238	10.938	7.58659e-28	3.91306e-26	Def8 protein
Smp_050520	126.55	4.54585	0.416844	10.9054	1.08597e-27	5.57001e-26	neurogenic locus notch protein
Smp_139840	598.596	2.06713	0.189639	10.9004	1.14782e-27	5.82789e-26	kunitz type protease inhibitor 2
Smp_167540	204.032	-4.88246	0.44792	-10.9003	1.14895e-27	5.82789e-26	dna replication factor cdt1
Smp_043110	449.667	2.62477	0.24137	10.8745	1.52551e-27	7.69544e-26	hypothetical protein
Smp_129410	209.114	-5.93264	0.546154	-10.8626	1.73759e-27	8.7174e-26	hypothetical protein
Smp_208030	151.503	4.34376	0.400466	10.8468	2.06627e-27	1.031e-25	hypothetical protein
Smp_150840	155.762	-3.95169	0.365727	-10.805	3.25867e-27	1.61718e-25	Cell growth regulating nucleolar protein
Smp_194910	99.237	3.98702	0.369916	10.7782	4.36365e-27	2.1539e-25	Saposin B domain containing protein
Smp_173610	57.3288	6.3981	0.594106	10.7693	4.80697e-27	2.36004e-25	hypothetical protein
Smp_194180	93.3584	7.85781	0.72972	10.7683	4.86104e-27	2.37389e-25	hypothetical protein
Smp_088800	297.772	-3.1194	0.290488	-10.7385	6.7135e-27	3.2612e-25	aspartyl tRNA synthetase
Smp_007070	70.6082	6.57243	0.616267	10.6649	1.48525e-26	7.17691e-25	neuropeptide Y receptor invertebrate
Smp_121800	664.227	-2.70571	0.253749	-10.6629	1.51752e-26	7.29444e-25	replication protein A 70 kDa DNA binding
Smp_194960	125.711	4.25852	0.399525	10.659	1.58359e-26	7.57237e-25	25 kDa integral membrane protein
Smp_007760	177.237	3.94786	0.370987	10.6415	1.91045e-26	9.08799e-25	alanine aminotransferase 2
Smp_007950	106.535	6.4718	0.609214	10.6232	2.32469e-26	1.10015e-24	beta 1,4 galactosyltransferase 4
Smp_124120	181.336	-5.06854	0.477699	-10.6103	2.66833e-26	1.2563e-24	dna polymerase epsilon subunit 2
Smp_059530	113.162	3.92822	0.370899	10.5911	3.27806e-26	1.5355e-24	tetraspanin
Smp_096790	215.164	4.79726	0.454525	10.5544	4.84527e-26	2.25809e-24	hypothetical protein
Smp_019760	134.012	-5.356	0.508293	-10.5372	5.818e-26	2.69773e-24	helicase polq
Smp_018170	432.56	4.11688	0.39079	10.5348	5.97273e-26	2.75556e-24	zinc finger protein
Smp_049580	660.21	7.03548	0.669325	10.5113	7.66234e-26	3.5174e-24	zinc finger protein
Smp_155490	295.186	3.03052	0.288748	10.4954	9.07011e-26	4.14292e-24	#N/A
Smp_129450	207.108	3.01657	0.287836	10.4802	1.06551e-25	4.84281e-24	glucose 6 phosphatase 3
Smp_203130	248.215	4.45663	0.426203	10.4566	1.36681e-25	6.18162e-24	Actin 5C
Smp_144280	105.433	5.74685	0.550086	10.4472	1.50932e-25	6.79269e-24	tensin
Smp_172250	268.772	6.6056	0.632554	10.4427	1.58171e-25	7.05239e-24	inositol 5 phosphatase
Smp_081190	71.4462	5.77715	0.553224	10.4427	1.58239e-25	7.05239e-24	GTP binding protein rhoA
Smp_165260	385.203	1.91244	0.183524	10.4207	1.99577e-25	8.85175e-24	WW domain protein (E3 ubiquitin ligase) family
Smp_079610	113.335	-4.46668	0.428839	-10.4158	2.10122e-25	9.27467e-24	POC1 centriolar protein A
Smp_038080	799.772	-2.19416	0.210844	-10.4065	2.31468e-25	1.0168e-23	importin subunit beta 1
Smp_014570	146.876	4.13934	0.397992	10.4006	2.46496e-25	1.07766e-23	Saposin,IPR008139 Saposin
Smp_173730	311.277	2.4995	0.240792	10.3803	3.04824e-25	1.32635e-23	hypothetical protein
Smp_106970	144.072	6.33664	0.610513	10.3792	3.08356e-25	1.33539e-23	family S9 non peptidase ue (S09 family)
Smp_145910	54.0184	7.09761	0.684307	10.372	3.3263e-25	1.43375e-23	protein tyrosine sulfotransferase
Smp_016250	331.407	-2.26135	0.218495	-10.3496	4.20032e-25	1.80202e-23	GTP binding protein (I) alpha 2 subunit gnai2
Smp_089240	495.484	2.80617	0.271179	10.348	4.27293e-25	1.82464e-23	alpha 1,6 mannosyl glycoprotein
Smp_200410	201.226	-4.45929	0.431108	-10.3438	4.46457e-25	1.89765e-23	thymidylate synthase
Smp_022450	104.958	7.03097	0.679876	10.3416	4.57061e-25	1.93377e-23	hypothetical protein
Smp_164730	182.294	5.90771	0.571467	10.3378	4.75364e-25	2.00198e-23	rhodopsin orphan GPCR
Smp_119910	94.2491	-5.16953	0.502115	-10.2955	7.38238e-25	3.09487e-23	#N/A
Smp_159490	138.722	6.4048	0.623489	10.2725	9.37408e-25	3.91197e-23	polypeptide GalNAc transferase 6
Smp_129050	236.291	2.41714	0.235694	10.2554	1.11885e-24	4.64803e-23	dynamin 1
Smp_147120	494.834	2.25377	0.219933	10.2475	1.21425e-24	5.02162e-23	DDRGK domain containing protein 1
Smp_154490	41.9668	5.01849	0.489824	10.2455	1.2397e-24	5.10388e-23	ras associating and dilute domain containing protein
Smp_137370	149.869	7.00959	0.68434	10.2428	1.27435e-24	5.22314e-23	cyclin dependent kinase 16
Smp_171140	137.812	5.28511	0.51603	10.2419	1.28727e-24	5.25264e-23	serine rich repeat protein
Smp_086860	439.524	-4.84455	0.473129	-10.2394	1.32092e-24	5.36611e-23	histone H2A
Smp_136190	492.359	5.50306	0.537531	10.2377	1.3444e-24	5.43742e-23	hypothetical protein
Smp_003230	219.112	4.26644	0.417096	10.2289	1.47185e-24	5.92679e-23	SH3 domain GRB2 endophilin B1
Smp_089670	108.392	5.08729	0.497861	10.2183	1.64222e-24	6.58393e-23	alpha 2 macroglobulin
Smp_139900	92.8509	3.3321	0.326664	10.2004	1.97522e-24	7.88457e-23	lysophosphatidic acid phosphatase type 6
Smp_118570	307.416	-3.82252	0.37525	-10.1866	2.27561e-24	9.04433e-23	hypothetical protein
Smp_056990	240.412	4.51136	0.4435	10.1722	2.63951e-24	1.04172e-22	thyroid receptor interacting protein 11
Smp_143490	577.361	-5.56758	0.547343	-10.172	2.64373e-24	1.04172e-22	DNA replication licensing factor MCM5
Smp_180190	191.171	-4.58925	0.451231	-10.1705	2.68524e-24	1.05355e-22	hypothetical protein
Smp_135010	395.35	2.80552	0.275915	10.1681	2.75318e-24	1.07561e-22	oxalate:formate antiporter
Smp_188150	97.7983	5.73992	0.564722	10.1642	2.86582e-24	1.11488e-22	hypothetical protein
Smp_044000	4386.68	2.92361	0.287805	10.1583	3.04248e-24	1.17861e-22	Bax inhibitor 1
Smp_021590	342.767	-5.13704	0.506152	-10.1492	3.34095e-24	1.28879e-22	Rac GTPase activating protein 1
Smp_128230	133.115	4.34475	0.428134	10.1481	3.37857e-24	1.29785e-22	neurogenic locus notch protein
Smp_046280	183.556	-6.37295	0.628533	-10.1394	3.69316e-24	1.41279e-22	actin binding protein anillin
Smp_194820	144.6	-6.04585	0.596348	-10.1381	3.74188e-24	1.42549e-22	dna repair and recombination protein rad54
Smp_020360	508.845	1.64967	0.162926	10.1252	4.26939e-24	1.61972e-22	hypothetical protein
Smp_065370	67.0531	4.3735	0.432048	10.1227	4.38156e-24	1.65544e-22	hypothetical protein
Smp_200090	156.189	4.57567	0.452647	10.1087	5.05562e-24	1.897e-22	hypothetical protein
Smp_101290	756.325	2.20337	0.217971	10.1086	5.06225e-24	1.897e-22	actin protein 2, arp2
Smp_123110	143.793	6.20127	0.613743	10.104	5.302e-24	1.97877e-22	hypothetical protein
Smp_148590	103.638	-5.86748	0.581997	-10.0816	6.66108e-24	2.47593e-22	hypothetical protein
Smp_194090	189.761	4.49574	0.4462	10.0756	7.08249e-24	2.62195e-22	subfamily S1A unassigned peptidase (S01 family)
Smp_051920	1054.47	-5.89125	0.584819	-10.0736	7.22721e-24	2.66478e-22	nanos 1
Smp_127200	436.168	4.3811	0.436038	10.0475	9.41995e-24	3.45938e-22	solute carrier family 2 facilitated glucose
Smp_091460	1864.33	3.36569	0.336164	10.012	1.34959e-23	4.9365e-22	glutamine synthetase
Smp_149720	228.938	4.23035	0.422579	10.0108	1.36646e-23	4.97837e-22	hypothetical protein
Smp_054840	588.203	-3.77402	0.378313	-9.97593	1.94279e-23	7.05009e-22	DNA replication licensing factor MCM2
Smp_141490	156.911	6.44006	0.64615	9.96681	2.12961e-23	7.69761e-22	hypothetical protein
Smp_038330	191.329	2.92371	0.293809	9.95106	2.49522e-23	8.98378e-22	nogo B receptor
Smp_195190	222.045	5.40804	0.543611	9.94837	2.56346e-23	9.19342e-22	13 kDa tegumental antigen Sm13
Smp_054010	125.992	-4.5193	0.454518	-9.94305	2.70422e-23	9.66048e-22	y+l amino acid transporter 2
Smp_078800	406.847	2.59093	0.260714	9.93783	2.84963e-23	1.01405e-21	dnaJ subfamily B
Smp_063530	200.028	4.48666	0.451934	9.92768	3.15498e-23	1.11837e-21	apoferritin-2
Smp_105220	731.014	-2.10273	0.211887	-9.9238	3.28011e-23	1.15826e-21	hypothetical protein
Smp_028670	556.202	2.78646	0.281549	9.89689	4.29429e-23	1.51057e-21	carbonic anhydrase II
Smp_089320	116.706	4.41053	0.44615	9.88576	4.79911e-23	1.6817e-21	Cell wall integrity and stress response
Smp_154010	170.154	4.61014	0.467603	9.8591	6.26099e-23	2.18563e-21	Halobacterial transducer protein VI
Smp_136470	56.8264	7.49007	0.759789	9.85809	6.32381e-23	2.1992e-21	pleckstrin y domain containing family G
Smp_079860	1091.7	2.1755	0.220998	9.84398	7.27754e-23	2.52132e-21	o acyltransferase (membrane bound) domain
Smp_136640	1005.35	2.54659	0.258905	9.836	7.8784e-23	2.71923e-21	programmed cell death protein
Smp_152670	190.191	-5.48846	0.558445	-9.82811	8.52037e-23	2.92979e-21	crossover junction endonuclease EME1
Smp_166820	125.157	-6.70325	0.682214	-9.82573	8.72419e-23	2.98869e-21	hypothetical protein
Smp_173440	183.673	-3.23542	0.329893	-9.8075	1.04522e-22	3.56733e-21	Fanconi anemia group J protein
Smp_167810	120.283	-3.97414	0.406221	-9.78321	1.32929e-22	4.52009e-21	family C50 non peptidase ue (C50 family)
Smp_074150	1571.02	3.45368	0.354446	9.74388	1.9593e-22	6.63777e-21	annexin
Smp_046800	147.261	4.51716	0.46369	9.74176	2.00054e-22	6.75257e-21	fatty acid binding protein
Smp_000850	478.669	2.99768	0.308126	9.72874	2.27397e-22	7.63849e-21	cysteine string protein
Smp_166150	169.894	-6.35179	0.652906	-9.72848	2.27965e-22	7.63849e-21	maternal embryonic leucine zipper kinase
Smp_130020	87.0922	-4.09134	0.420677	-9.7256	2.34514e-22	7.82935e-21	hypothetical protein
Smp_127750	121.901	-4.42709	0.455733	-9.71422	2.62243e-22	8.72337e-21	kelch domain containing protein 9
Smp_137710	2820.64	2.97021	0.306044	9.7052	2.86514e-22	9.49633e-21	major facilitator superfamily domain containing protein
Smp_170630	160.23	4.73515	0.487917	9.70483	2.87553e-22	9.49649e-21	Periostin, putative
Smp_050390	2715.54	2.57877	0.265774	9.70287	2.93124e-22	9.64578e-21	aldehyde dehydrogenase
Smp_154020	495.045	4.44376	0.45863	9.6892	3.35143e-22	1.09891e-20	ankyrin 2,3:unc44
Smp_018760	2901.29	2.29685	0.237161	9.68477	3.49981e-22	1.14348e-20	neutral alpha glucosidase AB
Smp_011270	464.091	2.42543	0.250636	9.67711	3.77241e-22	1.22817e-20	sj ts4 protein
Smp_054330	280.431	-2.94095	0.303997	-9.67428	3.8782e-22	1.25815e-20	cyclophilin
Smp_206030	83.7082	9.28843	0.960243	9.673	3.92679e-22	1.26943e-20	retinal specific ATP binding cassette
Smp_195180	767.289	5.33024	0.551554	9.66405	4.28593e-22	1.38067e-20	antigenic integral membrane glycoprotein
Smp_104520	955.437	2.26554	0.234474	9.66221	4.36334e-22	1.40069e-20	vacuolar protein sorting 45
Smp_075370	239.172	4.87049	0.504448	9.6551	4.6768e-22	1.49609e-20	hypothetical protein
Smp_173420	320.411	-3.99565	0.414036	-9.65049	4.89237e-22	1.55961e-20	leucine rich repeat protein 1
Smp_135220	373.866	-3.40832	0.353456	-9.64284	5.27103e-22	1.67451e-20	tectonic 1
Smp_154670	79.0686	8.70407	0.903376	9.63504	5.68691e-22	1.8004e-20	glycosyltransferase 14 family member
Smp_134960	54.2198	4.34226	0.451129	9.62531	6.25156e-22	1.97235e-20	peptide (allatostatin:somatostatin)
Smp_176610	258.889	5.21705	0.543128	9.60557	7.5737e-22	2.38131e-20	BTB:POZ domain containing protein
Smp_136620	326.985	5.46226	0.568946	9.60068	7.94189e-22	2.48855e-20	hypothetical protein
Smp_192400	59.7739	4.69126	0.488819	9.59714	8.2194e-22	2.56675e-20	hypothetical protein
Smp_141540	366.753	-3.74478	0.390801	-9.58233	9.48789e-22	2.95283e-20	Thymidine kinase 2, mitochondrial
Smp_153870	141.327	4.87602	0.508977	9.58004	9.70028e-22	2.99859e-20	serine:threonine protein kinase ULK4
Smp_169570	81.5588	4.327	0.451662	9.58018	9.68779e-22	2.99859e-20	glycerol 3 phosphate dehydrogenase
Smp_056760	5780.72	1.66212	0.173647	9.57182	1.05039e-21	3.23611e-20	protein disulfide isomerase
Smp_137390	214.518	-6.36266	0.66526	-9.56417	1.13109e-21	3.47308e-20	histone RNA hairpin binding protein
Smp_005670	502.689	1.9288	0.201754	9.56013	1.17614e-21	3.59938e-20	rab11
Smp_156630	464.599	5.54459	0.580328	9.55424	1.2449e-21	3.79717e-20	hypothetical protein
Smp_075110	113.685	-5.36344	0.562847	-9.52913	1.58608e-21	4.82177e-20	cell cycle checkpoint protein rad1
Smp_065890	787.977	2.24971	0.236254	9.52242	1.69184e-21	5.12634e-20	toll interacting protein
Smp_047660	53.5957	5.32241	0.559079	9.51995	1.73258e-21	5.23252e-20	Ferritin-2 heavy chain
Smp_152370	891.631	1.84786	0.194125	9.51892	1.74991e-21	5.26751e-20	ADP ribosylation factor GTPase activating
Smp_105200	205.342	-3.26072	0.343162	-9.50198	2.05935e-21	6.17873e-20	glypican 4
Smp_022070	74.9098	3.66425	0.386174	9.48859	2.34178e-21	7.00322e-20	hypothetical protein
Smp_065470	751.09	2.042	0.21523	9.48756	2.36512e-21	7.05007e-20	tumor protein d52
Smp_202130	136.793	3.22794	0.340512	9.47968	2.55052e-21	7.5781e-20	hypothetical protein
Smp_140000	295.118	3.43044	0.362206	9.47097	2.77255e-21	8.21122e-20	tetraspanin CD63 receptor
Smp_158600	1603.71	2.16376	0.228486	9.47	2.79855e-21	8.26158e-20	dolichyl diphosphooligosaccharide protein
Smp_172390	270.684	2.34518	0.247661	9.46934	2.81628e-21	8.28726e-20	UDP galactose transporter
Smp_187480	125.058	3.71657	0.392931	9.45857	3.12185e-21	9.15711e-20	hypothetical protein
Smp_161820	67.5096	-6.04827	0.639709	-9.45473	3.23852e-21	9.46906e-20	hypothetical protein
Smp_160440	257.914	-2.63953	0.279281	-9.45116	3.35105e-21	9.76698e-20	zinc finger protein 91
Smp_146250	227.876	4.56558	0.483781	9.43727	3.82611e-21	1.11163e-19	fucosidase, alpha L 2, plasma
Smp_135980	45.4604	6.12302	0.649098	9.43312	3.98064e-21	1.15288e-19	Calcium binding protein
Smp_139340	1235.04	2.36136	0.25083	9.41416	4.7686e-21	1.37675e-19	hypothetical protein
Smp_198280	219.964	2.10354	0.223797	9.39929	5.49306e-21	1.58093e-19	#N/A
Smp_212450	39.1795	4.90245	0.522291	9.38643	6.20657e-21	1.7807e-19	placental protein 11
Smp_171530	158.923	2.45192	0.261819	9.36492	7.61073e-21	2.17676e-19	alpha parvin
Smp_139810	1176.16	5.45358	0.583736	9.34255	9.40417e-21	2.68136e-19	coiled coil domain containing protein 39
Smp_153520	229.06	-6.66535	0.713466	-9.34221	9.43434e-21	2.68163e-19	protein ect2
Smp_088310	313.307	2.39274	0.256315	9.33516	1.00837e-20	2.85735e-19	sesquipedalian 1
Smp_047620	133.855	-4.39674	0.471193	-9.33109	1.04791e-20	2.96026e-19	G2:mitotic specific cyclin B3
Smp_141430	81.4846	-6.68621	0.716869	-9.32697	1.08944e-20	3.06814e-19	hypothetical protein
Smp_055890	1031.19	-3.82055	0.409659	-9.32616	1.09774e-20	3.08208e-19	ribonucleoside diphosphate reductase subunit M2
Smp_004590	139.711	4.83777	0.519311	9.31573	1.21113e-20	3.39007e-19	hypothetical protein
Smp_203390	398.369	-2.53972	0.272706	-9.31301	1.24255e-20	3.45692e-19	hypothetical protein
Smp_154080	126.302	-5.20549	0.558936	-9.31321	1.24029e-20	3.45692e-19	hypothetical protein
Smp_156360	312.17	-2.6772	0.287625	-9.30798	1.30289e-20	3.61385e-19	#N/A
Smp_105420	421.044	3.89706	0.418905	9.30298	1.36563e-20	3.77645e-19	Saposin,IPR008139 Saposin
Smp_156530	362.813	4.54031	0.488069	9.3026	1.37052e-20	3.77861e-19	peptidylglycine alpha amidating monooxygenase
Smp_079560	279.64	-5.82387	0.626234	-9.29984	1.40656e-20	3.86635e-19	DNA replication licensing factor MCM2
Smp_136650	49.3956	8.09087	0.872511	9.27309	1.80828e-20	4.95576e-19	#N/A
Smp_168400	153.788	-3.49095	0.376678	-9.26774	1.90135e-20	5.19532e-19	mis12
Smp_042670	282.101	-3.34428	0.361879	-9.24144	2.43193e-20	6.62539e-19	dna mismatch repair protein msh6
Smp_124300	1011.66	-3.16271	0.342448	-9.23559	2.56862e-20	6.97708e-19	Lamin B receptor (ERG24)
Smp_101970	1286.98	4.3904	0.476096	9.22168	2.92485e-20	7.92127e-19	Placenta specificprotein 8 protein (C15 protein)
Smp_099690	1233.66	3.46381	0.375679	9.22012	2.96772e-20	7.99021e-19	RER1 retention in endoplasmic reticulum 1
Smp_018290	245.193	-2.93737	0.318582	-9.22015	2.96697e-20	7.99021e-19	serine:threonine protein kinase 17A
Smp_143170	675.271	1.87465	0.203484	9.21274	3.17914e-20	8.5344e-19	er degradation enhancing alpha mannosidase
Smp_137610	162.938	5.79479	0.631453	9.17692	4.43618e-20	1.18742e-18	focal adhesion kinase 1
Smp_013310	41.1618	6.10382	0.666109	9.16339	5.02936e-20	1.34228e-18	hypothetical protein
Smp_098320	196.867	2.95546	0.322862	9.15394	5.48926e-20	1.46078e-18	inositol tetrakisphosphate kinase
Smp_170960	188.543	7.53831	0.824442	9.14352	6.045e-20	1.60402e-18	serine rich repeat protein
Smp_134250	457.014	-3.31023	0.362078	-9.14232	6.11291e-20	1.61737e-18	heparan sulfate
Smp_151280	602.348	2.63661	0.288417	9.14163	6.15157e-20	1.62292e-18	cAMP responsive element binding protein 3
Smp_151360	81.8863	-5.91875	0.648797	-9.12265	7.33089e-20	1.92851e-18	hypothetical protein
Smp_143930	49.6304	5.61583	0.615852	9.1188	7.59573e-20	1.99247e-18	SH3 and multiple ankyrin repeat domains protein
Smp_078310	573.559	-2.18552	0.24006	-9.10408	8.70017e-20	2.27568e-18	ran binding protein
Smp_197530	69.528	4.08922	0.450684	9.07335	1.1541e-19	3.01016e-18	hypothetical protein
Smp_008230	542.841	2.42355	0.267253	9.06835	1.2083e-19	3.14261e-18	ras protein Rab 18
Smp_210780	467.909	2.12097	0.234191	9.05657	1.34622e-19	3.49143e-18	Loss of heterozygosity 11 chromosomal region 2
Smp_154090	153.287	-5.00805	0.553622	-9.04597	1.48342e-19	3.8364e-18	protein of unknown function DUF729
Smp_033330	591.902	2.29576	0.254525	9.0198	1.88438e-19	4.85969e-18	sh3 domain binding glutamic acid rich
Smp_102160	1053.95	1.79698	0.199555	9.00493	2.15799e-19	5.54973e-18	vesicle associated membrane protein 1
Smp_197860	92.391	4.97289	0.553671	8.98165	2.66724e-19	6.84022e-18	gelsolin
Smp_198820	330.477	-3.01747	0.336089	-8.9782	2.75235e-19	7.03881e-18	DNA replication complex GINS protein PSF3
Smp_123660	56.7437	4.0905	0.456477	8.96103	3.21648e-19	8.20292e-18	peroxidasin
Smp_100040	456.087	2.05379	0.229338	8.95531	3.3878e-19	8.6159e-18	hypothetical protein
Smp_015840	505.03	-1.79428	0.2007	-8.94014	3.88675e-19	9.85753e-18	zinc finger and SCAN domain containing protein
Smp_067260	168.193	-5.18354	0.580073	-8.93601	4.03482e-19	1.02049e-17	dna polymerase alpha subunit b
Smp_212420	181.223	6.65433	0.745086	8.93096	4.22331e-19	1.06376e-17	SH3 domain containing kinase binding protein 1
Smp_008860	240.982	3.18045	0.356121	8.93081	4.22908e-19	1.06376e-17	phospholipid scramblase 1
Smp_144840	898.958	2.23595	0.250381	8.9302	4.25252e-19	1.06673e-17	Thioredoxin domain containing protein 4
Smp_128870	147.931	-6.23864	0.698851	-8.927	4.37701e-19	1.09497e-17	nibrin
Smp_164380	137.566	4.38778	0.491702	8.92364	4.51209e-19	1.12569e-17	protein KINase family member (kin 1)
Smp_136160	227.388	-2.89884	0.324891	-8.92248	4.55966e-19	1.13448e-17	hypothetical protein
Smp_199870	71.8516	-4.54741	0.509864	-8.91888	4.71039e-19	1.16881e-17	hypothetical protein
Smp_003610	192.302	5.81324	0.65195	8.9167	4.80406e-19	1.18884e-17	DM9 domain containing protein
Smp_128930	61.4196	6.08171	0.682214	8.91467	4.89278e-19	1.20754e-17	spectrin beta chain
Smp_070780	227.608	4.14137	0.464673	8.91244	4.99228e-19	1.2288e-17	UDP glucose 4 epimerase
Smp_062070	1543.41	2.73354	0.306832	8.90893	5.15277e-19	1.26491e-17	sulfide quinone reductase
Smp_035550	33.7714	8.22757	0.924692	8.89763	5.70509e-19	1.39676e-17	hypothetical protein
Smp_086480	155.169	4.47822	0.503607	8.89228	5.98683e-19	1.46184e-17	tegument-allergen-like protein
Smp_125040	340.376	-4.45914	0.501523	-8.8912	6.04548e-19	1.47224e-17	Epa2p protein
Smp_076710	275.316	-3.77347	0.424486	-8.88951	6.13805e-19	1.49083e-17	hypothetical protein
Smp_149120	109.355	-2.86428	0.322605	-8.87862	6.76966e-19	1.6399e-17	insect origin recognition complex subunit
Smp_205920	36.6112	6.44156	0.727068	8.85964	8.02744e-19	1.93947e-17	protocadherin 1
Smp_048240	436.652	1.88008	0.212368	8.85292	8.52605e-19	2.05453e-17	mannose 1 phosphate guanyltransferase
Smp_144310	87.4353	6.73806	0.761389	8.8497	8.77556e-19	2.10912e-17	potassium voltage gated channel subfamily KQT
Smp_123480	248.271	5.049	0.571093	8.84094	9.49126e-19	2.27518e-17	serine:threonine kinase 33
Smp_147800	83.3992	6.41898	0.726153	8.8397	9.59752e-19	2.29466e-17	Lmp3 protein
Smp_136660	89.7515	6.46303	0.731382	8.83674	9.85523e-19	2.35015e-17	pro neuregulin 2
Smp_180810	140.424	4.70671	0.532926	8.83182	1.02985e-18	2.4495e-17	Papilin
Smp_161070	63.284	4.32253	0.489614	8.82844	1.06149e-18	2.51822e-17	hypothetical protein
Smp_213850	399.251	-1.94737	0.220946	-8.81377	1.21002e-18	2.8632e-17	hypothetical protein
Smp_155570	130.622	4.04296	0.459761	8.79361	1.44828e-18	3.41815e-17	endoglycoceramidase
Smp_021280	126.943	4.0362	0.459027	8.79294	1.45702e-18	3.42997e-17	hypothetical protein
Smp_162790	149.898	3.3074	0.376386	8.78726	1.53257e-18	3.59859e-17	membrane protein, palmitoylated 5
Smp_166800	91.9642	-3.69386	0.421921	-8.75486	2.04356e-18	4.78621e-17	hypothetical protein
Smp_047650	115.207	3.3719	0.386209	8.73076	2.52957e-18	5.9094e-17	Ferritin-2 heavy chain
Smp_140770	81.9702	5.52446	0.633563	8.71968	2.78984e-18	6.50089e-17	protein phosphatase 7
Smp_126300	449.061	3.43588	0.394142	8.71737	2.84744e-18	6.60159e-17	secretory pathway calcium atpase e
Smp_092530	1007.19	1.63072	0.187061	8.71756	2.84249e-18	6.60159e-17	adapter protein complex 1 gamma subunit
Smp_120050	45.7214	7.07088	0.811717	8.71102	3.01158e-18	6.96456e-17	endoglycoceramidase
Smp_146720	220.369	4.86127	0.558455	8.70485	3.18006e-18	7.33572e-17	tissue type plasminogen activator
Smp_176190	116.101	2.62006	0.301279	8.69645	3.42417e-18	7.87903e-17	#N/A
Smp_167630	68.4798	4.63595	0.533268	8.69347	3.51523e-18	8.04821e-17	zinc transporter foi
Smp_213590	229.853	2.15445	0.247819	8.69362	3.5107e-18	8.04821e-17	hypothetical protein
Smp_138100	62.9204	5.09556	0.586728	8.68469	3.79773e-18	8.67338e-17	hypothetical protein
Smp_165420	404.299	2.47975	0.285562	8.68376	3.82903e-18	8.72317e-17	zinc finger protein
Smp_196040	883.584	1.63383	0.188163	8.68305	3.85291e-18	8.75584e-17	SHC transforming protein 3
Smp_146710	33.0196	7.85375	0.904965	8.67851	4.00999e-18	9.09031e-17	hypothetical protein
Smp_146600	151.768	3.76955	0.434454	8.67653	4.08026e-18	9.22681e-17	ras gene family, member A
Smp_004060	271.924	-5.56585	0.642403	-8.66411	4.55038e-18	1.02646e-16	cell division cycle 20
Smp_214190	166.192	4.60222	0.532208	8.6474	5.26855e-18	1.18555e-16	calpain
Smp_128110	39.1048	4.65664	0.538672	8.64466	5.3967e-18	1.21142e-16	aquaporin 1
Smp_051420	195.805	-2.06066	0.239279	-8.61197	7.18167e-18	1.60817e-16	eri1 exoribonuclease 2
Smp_071520	39.7931	4.62937	0.537908	8.60625	7.5488e-18	1.68627e-16	hypothetical protein
Smp_103810	1218.35	-2.409	0.280159	-8.59869	8.0629e-18	1.79673e-16	hypothetical protein
Smp_062080	69.7793	-3.98418	0.464117	-8.58442	9.12985e-18	2.02957e-16	serine protease inhibitors serpins
Smp_079420	314.554	3.07908	0.358737	8.5831	9.2347e-18	2.04792e-16	ankyrin repeat domain containing protein 42
Smp_179810	494.488	3.02385	0.352369	8.58149	9.36546e-18	2.07191e-16	oncosphere protein tso22e
Smp_168220	44.1147	-4.54053	0.529834	-8.56972	1.03733e-17	2.28935e-16	protein regulator of cytokinesis 1
Smp_026400	47.9692	-7.59064	0.88582	-8.56905	1.04346e-17	2.29735e-16	thyrotroph embryonic factor
Smp_075220	602.599	-1.86655	0.218088	-8.55869	1.1416e-17	2.50742e-16	mitochondrial intermediate peptidase
Smp_027920	514.349	-4.04731	0.474059	-8.53757	1.37078e-17	3.00361e-16	Tubulin alpha 1 chain
Smp_157400	65.4712	-4.46552	0.52366	-8.52752	1.49517e-17	3.26837e-16	family M13 unassigned peptidase (M13 family)
Smp_156910	128.845	4.90895	0.575748	8.52622	1.5121e-17	3.29754e-16	hypothetical protein
Smp_012930	425.203	-2.09377	0.245719	-8.52098	1.58207e-17	3.44195e-16	inosine 5' monophosphate dehydrogenase 2
Smp_038030	240.852	2.01205	0.236188	8.51884	1.61153e-17	3.49774e-16	adenylosuccinate lyase
Smp_187900	40.8606	5.31139	0.623913	8.51304	1.69437e-17	3.66023e-16	hypothetical protein
Smp_124050	89.948	3.30483	0.388207	8.51306	1.69403e-17	3.66023e-16	venom allergen-like (VAL) 6 protein
Smp_210240	61.666	3.49034	0.410176	8.50938	1.74872e-17	3.76878e-16	#N/A
Smp_153340	786.523	2.13174	0.250609	8.50622	1.79689e-17	3.86353e-16	ectonucleotide pyrophosphatase:phosphodiesterase
Smp_134130	43.5647	5.84918	0.689828	8.47919	2.26775e-17	4.86453e-16	ring canal kelch
Smp_212710	233.19	4.71383	0.556715	8.46722	2.51317e-17	5.37842e-16	gynecophoral canal protein, putative
Smp_090930	622.408	-2.10696	0.248979	-8.46239	2.61957e-17	5.59309e-16	hypothetical protein
Smp_043940	210.547	1.89917	0.224604	8.45565	2.7753e-17	5.91184e-16	synaptosomal associated protein 29
Smp_130920	94.9115	5.64681	0.667928	8.45422	2.80958e-17	5.97101e-16	multiple C2 and transmembrane domain containing protein
Smp_009710	509.888	-1.83051	0.216677	-8.44813	2.96004e-17	6.27625e-16	general transcription factor 3C polypeptide 3
Smp_136040	159.532	-2.45491	0.290764	-8.44294	3.09459e-17	6.54641e-16	dual specificity protein phosphatase 16
Smp_169730	1012.39	-2.72467	0.322807	-8.44056	3.15829e-17	6.6658e-16	fascin
Smp_203660	358.544	-3.37743	0.400219	-8.43896	3.20185e-17	6.74225e-16	hypothetical protein
Smp_174550	41.9717	5.30186	0.628517	8.43552	3.29741e-17	6.92758e-16	hypothetical protein
Smp_132770	311.897	2.58615	0.306655	8.43342	3.35712e-17	7.03692e-16	E3 ubiquitin protein ligase RNF19
Smp_083780	405.074	-2.38194	0.282459	-8.43289	3.37239e-17	7.05283e-16	ATP dependent DNA helicase 2 subunit 2
Smp_211310	43.578	6.46686	0.768335	8.41672	3.87163e-17	8.07851e-16	soluble guanylate cyclase gcy
Smp_146430	104.798	3.51431	0.418267	8.40207	4.3867e-17	9.13248e-16	beta 14 galactosyltransferase
Smp_154840	397.921	1.73743	0.206805	8.40132	4.41499e-17	9.17059e-16	hypothetical protein
Smp_012480	262.418	-2.50426	0.298199	-8.39796	4.54288e-17	9.39374e-16	exonuclease 1
Smp_164040	195.372	-5.48239	0.652819	-8.39803	4.54038e-17	9.39374e-16	hypothetical protein
Smp_006860	471.37	2.66736	0.317913	8.39021	4.85288e-17	1.00122e-15	PDZ and LIM domain protein Zasp
Smp_126350	731.707	4.18411	0.500382	8.36182	6.17603e-17	1.27135e-15	NMDA type glutamate receptor 1
Smp_136400	1310.51	2.16795	0.259279	8.36143	6.19617e-17	1.27264e-15	cytochrome b 561
Smp_058990	174.257	-3.07341	0.367982	-8.35207	6.70774e-17	1.37464e-15	meiotic nuclear division protein 1
Smp_079240	448.421	-2.9464	0.352788	-8.35175	6.72575e-17	1.37526e-15	dUTP pyrophosphatase
Smp_179750	107.343	5.38903	0.645548	8.34799	6.94351e-17	1.41663e-15	protocadherin 1
Smp_156770	449.978	4.18662	0.501748	8.34407	7.17758e-17	1.46114e-15	major tegumental antigen SM15
Smp_174820	55.6741	-5.84374	0.701337	-8.33229	7.92918e-17	1.61057e-15	hypothetical protein
Smp_178740	400.744	-3.20067	0.384884	-8.31594	9.10274e-17	1.84486e-15	protein lin 54
Smp_205630	147.858	-3.56035	0.428283	-8.31308	9.32473e-17	1.88569e-15	hypothetical protein
Smp_179490	59.4358	5.52982	0.66539	8.31064	9.51885e-17	1.92072e-15	hypothetical protein
Smp_050820	363.907	-3.44394	0.414427	-8.31011	9.56098e-17	1.92499e-15	Replication factor C 38 kDa subunit
Smp_033970	584.478	-2.45093	0.295554	-8.29268	1.10726e-16	2.22446e-15	flotillin 2
Smp_125760	66.2066	-6.02182	0.726376	-8.29023	1.1303e-16	2.26578e-15	denticleless protein
Smp_094630	1153.75	-1.22818	0.148356	-8.27858	1.24652e-16	2.49331e-15	nuclear receptor coactivator 5
Smp_075500	67.2315	4.97048	0.600565	8.27633	1.27026e-16	2.53528e-15	hypothetical protein
Smp_077720	55.0592	4.02576	0.48667	8.27206	1.31666e-16	2.62217e-15	annexin B2
Smp_126010	34.9805	5.6078	0.678102	8.26985	1.34128e-16	2.66543e-15	neuropeptide Y receptor invertebrate
Smp_008830	683.912	-2.13976	0.258865	-8.26596	1.38578e-16	2.74792e-15	SWI:SNF related, matrix associated, actin
Smp_035700	406.874	2.60081	0.314728	8.26368	1.41251e-16	2.79488e-15	adenosine deaminase
Smp_126770	558.746	1.97107	0.238548	8.26281	1.42285e-16	2.80929e-15	Islet cell autoantigen 1
Smp_143460	173.527	-5.47153	0.663093	-8.25153	1.56375e-16	3.08085e-15	disks large associated protein 5
Smp_167230	68.3711	3.02924	0.367472	8.24346	1.67307e-16	3.28918e-15	golgi resident protein gcp60
Smp_145470	175.847	-6.03739	0.73312	-8.2352	1.79253e-16	3.5165e-15	zinc finger protein
Smp_157820	138.876	3.16849	0.385296	8.22351	1.97633e-16	3.86881e-15	serine protein kinase ATM
Smp_156880	525.438	2.09838	0.255211	8.22213	1.99924e-16	3.90532e-15	protein transport protein sec24c
Smp_131080	57.2261	4.41529	0.537354	8.21673	2.09125e-16	4.07638e-15	hypothetical protein
Smp_050890	512.464	2.48601	0.302739	8.21173	2.1803e-16	4.24096e-15	hypothetical protein
Smp_125990	42.816	5.36962	0.65422	8.20766	2.25537e-16	4.37771e-15	hypothetical protein
Smp_019100	570.348	1.63736	0.199984	8.18745	2.66812e-16	5.16794e-15	EH domain containing protein 1
Smp_015070	478.044	2.23999	0.273648	8.18563	2.70878e-16	5.23564e-15	vacuolar atp synthase subunit h
Smp_054610	172	-5.37847	0.658284	-8.17045	3.0724e-16	5.92599e-15	WD repeat and HMG box DNA binding protein 1
Smp_141080	515.972	1.68808	0.206936	8.15749	3.42058e-16	6.58372e-15	DnaJ subfamily B 1
Smp_199340	92.7337	-2.82862	0.347165	-8.14776	3.7073e-16	7.12066e-15	aspartyl tRNA synthetase
Smp_171150	368.102	-1.80503	0.221655	-8.14341	3.84283e-16	7.36555e-15	protein arginine N methyltransferase 5
Smp_038960	1408.88	2.97376	0.365795	8.12959	4.30759e-16	8.23916e-15	lactate dehydrogenase protein
Smp_159990	211.955	4.68512	0.576827	8.12222	4.57745e-16	8.73712e-15	Voltage gated calcium channel, L type, alpha
Smp_071970	178.585	2.84999	0.351637	8.10493	5.27742e-16	1.00523e-14	chloride channel protein 3
Smp_079480	124.432	3.39587	0.419191	8.10103	5.44976e-16	1.03591e-14	hypothetical protein
Smp_143680	33.4187	4.92915	0.608504	8.10045	5.47577e-16	1.0387e-14	laminin subunit
Smp_033550	36.558	3.99842	0.49416	8.09134	5.90103e-16	1.11706e-14	sodium:potassium transporting ATPase subunit
Smp_092770	1201.39	1.45619	0.180035	8.08839	6.04589e-16	1.14213e-14	Coatomer subunit gamma
Smp_171370	188.617	-5.03198	0.622624	-8.0819	6.37632e-16	1.20207e-14	serine:threonine protein kinase Chk2
Smp_058450	261.372	4.42095	0.547187	8.07941	6.50792e-16	1.22437e-14	protein phosphatase 1 regulatory subunit
Smp_157190	42.8622	-5.95994	0.738666	-8.06852	7.11568e-16	1.33597e-14	hypothetical protein
Smp_081510	402.806	-1.75135	0.217263	-8.06098	7.56883e-16	1.41815e-14	dual specificity protein phosphatase 12
Smp_057130	1077.11	2.55014	0.316517	8.05687	7.82712e-16	1.46356e-14	adiponectin receptor protein 2
Smp_096360	333.622	-2.85841	0.354952	-8.05293	8.08321e-16	1.50837e-14	replication factor C subunit 4
Smp_141500	218.347	4.90298	0.609046	8.05026	8.26177e-16	1.53857e-14	hypothetical protein
Smp_157710	536.391	1.80933	0.225093	8.03813	9.12227e-16	1.69538e-14	phosphoacetylglucosamine mutase
Smp_027500	70.9053	-3.40405	0.423879	-8.03072	9.69e-16	1.79725e-14	heat shock protein beta 11
Smp_181410	355.952	-3.74704	0.46679	-8.02723	9.96948e-16	1.84536e-14	hypothetical protein
Smp_198970	543.635	3.58946	0.447341	8.02399	1.02367e-15	1.89101e-14	Phospholipase A2
Smp_169120	40.089	-5.77827	0.72051	-8.0197	1.06006e-15	1.9543e-14	DNA mismatch repair protein MSH2
Smp_173880	69.0897	-4.05862	0.506172	-8.01827	1.07242e-15	1.97313e-14	RAD9 A
Smp_088270	69.7382	4.28308	0.535201	8.00275	1.2167e-15	2.23411e-14	subfamily M14A unassigned peptidase
Smp_135890	109.901	-4.61943	0.577456	-7.99963	1.24792e-15	2.28685e-14	hypothetical protein
Smp_055200	1704.93	2.66557	0.333576	7.99091	1.33951e-15	2.44981e-14	Tumor suppressor candidate 3 (protein N33)
Smp_163930	42.6617	7.30568	0.914662	7.9873	1.37921e-15	2.51741e-14	hypothetical protein
Smp_080860	110.314	5.25387	0.658057	7.98392	1.41754e-15	2.58223e-14	#N/A
Smp_003770	3683.2	-2.1016	0.263361	-7.97993	1.46413e-15	2.66182e-14	histone H1
Smp_128160	40.8335	-4.68053	0.586711	-7.97757	1.4924e-15	2.70784e-14	CST complex subunit STN1
Smp_149890	53.9209	2.74771	0.34472	7.97084	1.57597e-15	2.85384e-14	hypothetical protein
Smp_180670	53.1697	5.44871	0.684008	7.96586	1.64085e-15	2.96548e-14	hypothetical protein
Smp_153630	68.8349	-4.23258	0.531389	-7.96512	1.65065e-15	2.97734e-14	hypothetical protein
Smp_131250	423.745	2.5045	0.314479	7.96396	1.66619e-15	2.99946e-14	hypothetical protein
Smp_164560	47.4392	-5.54838	0.69671	-7.96368	1.66999e-15	3.00042e-14	hypothetical protein
Smp_035300	1072.2	2.86273	0.359668	7.95936	1.72925e-15	3.10082e-14	snare protein sec22
Smp_076600	90.2988	-4.39664	0.552573	-7.95668	1.76718e-15	3.16267e-14	transcription factor SOX 14
Smp_202630	169.731	-2.59395	0.326183	-7.95243	1.82886e-15	3.26668e-14	protein quiver
Smp_148910	25.7819	5.11585	0.64371	7.94745	1.90388e-15	3.39408e-14	hypothetical protein
Smp_127450	95.1683	5.68415	0.715243	7.94716	1.90843e-15	3.39559e-14	hypothetical protein
Smp_182090	28.3571	6.114	0.77055	7.93459	2.11192e-15	3.7504e-14	hypothetical protein
Smp_166890	62.0418	5.23052	0.659284	7.93365	2.12803e-15	3.77171e-14	ATPase
Smp_080530	440.298	-2.52229	0.318446	-7.92061	2.3635e-15	4.18098e-14	replication protein A 32 kDa subunit
Smp_070680	575.686	-1.76709	0.223213	-7.91662	2.44062e-15	4.30911e-14	repressor of RNA polymerase III transcription
Smp_176120	119.546	4.17592	0.527532	7.91595	2.45364e-15	4.32377e-14	ring finger protein 11 (sid 1669) (nedd4 ww
Smp_089570	1119.57	3.26272	0.412485	7.90991	2.57578e-15	4.53031e-14	stress associated endoplasmic reticulum protein
Smp_191500	47.5081	6.01084	0.760394	7.9049	2.68159e-15	4.7074e-14	potassium channel, KvQLT family member (kqt 1)
Smp_194970	48.3755	5.48144	0.694066	7.89758	2.84378e-15	4.98258e-14	25 kDa integral membrane protein
Smp_154370	54.6051	-5.19199	0.658231	-7.8878	3.07563e-15	5.37854e-14	outer dense fiber protein 3
Smp_212260	1657.38	-1.93082	0.244919	-7.88351	3.183e-15	5.55572e-14	histone binding protein Caf1
Smp_085520	1202.54	1.71309	0.217322	7.88271	3.20362e-15	5.57053e-14	ATPase, H+ transporting, lysosomal 31 kDa, V1
Smp_104980	401.162	-3.23079	0.409853	-7.8828	3.20131e-15	5.57053e-14	G2:M phase specific E3 ubiquitin protein ligase
Smp_173450	84.9356	-7.61676	0.96659	-7.88003	3.27294e-15	5.68031e-14	chromosome associated kinesin KIF4A
Smp_059820	152.596	3.28038	0.417291	7.86112	3.80708e-15	6.59486e-14	hypothetical protein
Smp_162770	112.874	2.5633	0.326216	7.85768	3.91307e-15	6.7657e-14	lysosome associated membrane glycoprotein
Smp_181910	29.0136	6.46774	0.823573	7.85326	4.05345e-15	6.99525e-14	hypothetical protein
Smp_074650	237.198	3.28781	0.420681	7.81543	5.47739e-15	9.43488e-14	Schistosoma protein, unknown function
Smp_134210	87.3884	5.12295	0.655786	7.81192	5.63224e-15	9.68345e-14	peptidase inhibitor 16
Smp_131580	142.839	4.83511	0.62107	7.78513	6.96401e-15	1.19508e-13	lysosomal alpha mannosidase
Smp_104210	30.943	5.92317	0.761239	7.78097	7.1972e-15	1.23279e-13	RHO G-protein coupled receptor
Smp_126530	48.8364	4.12687	0.530509	7.77907	7.30621e-15	1.24913e-13	v ets erythroblastosis virus E26 oncogene
Smp_103340	152.542	-3.40533	0.437814	-7.77803	7.36651e-15	1.2571e-13	hypothetical protein
Smp_077560	221.369	2.20464	0.283469	7.77738	7.40398e-15	1.26115e-13	Hippocampus abundant transcript 1 protein
Smp_152940	20.8127	6.20499	0.798296	7.77279	7.67748e-15	1.30366e-13	otopetrin
Smp_104790	93.5183	-3.26899	0.420572	-7.77272	7.68193e-15	1.30366e-13	leucine rich repeat containing protein 34
Smp_054350	66.5051	5.15799	0.66383	7.77004	7.8461e-15	1.32906e-13	Forkhead box protein D3
Smp_179650	1792.45	-2.76131	0.35555	-7.76631	8.08039e-15	1.36371e-13	chromobox protein
Smp_135900	86.8373	-5.30055	0.682492	-7.76646	8.07098e-15	1.36371e-13	DNA double strand break repair rad50 ATPase
Smp_015710	337.64	-1.78744	0.230369	-7.75903	8.55838e-15	1.44173e-13	6 phosphofructo 2 kinase:fructose 2
Smp_140990	38.1357	5.60061	0.722299	7.75386	8.91391e-15	1.49887e-13	hypothetical protein
Smp_005330	203.527	-2.91966	0.376658	-7.75149	9.08237e-15	1.52441e-13	methionine tRNA synthetase
Smp_198020	188.277	-3.06209	0.395784	-7.73677	1.01977e-14	1.70848e-13	o methyltransferase
Smp_041540	39.5311	-6.31505	0.81689	-7.73059	1.07048e-14	1.79018e-13	Hormone receptor 4 (dHR4)
Smp_075870	1632.2	1.85483	0.24038	7.71625	1.19806e-14	1.99988e-13	Translocation associated membrane protein 1
Smp_194530	88.2684	-4.10921	0.53264	-7.7148	1.21175e-14	2.01907e-13	adenylate kinase isoenzyme 5
Smp_143260	69.5822	4.23849	0.549635	7.71145	1.24398e-14	2.06901e-13	hypothetical protein
Smp_128920	39.0127	5.43667	0.705741	7.70349	1.32402e-14	2.19817e-13	spectrin beta chain
Smp_131020	134.107	4.76534	0.618647	7.70285	1.33068e-14	2.20523e-13	transmembrane and TPR repeat containing protein
Smp_145320	40.0568	5.14702	0.669386	7.68918	1.48087e-14	2.4497e-13	solute carrier family 26
Smp_058660	46.986	3.99651	0.520019	7.68531	1.52621e-14	2.52017e-13	hypothetical protein
Smp_012580	48.9096	4.01882	0.523301	7.67976	1.59393e-14	2.62255e-13	hypothetical protein
Smp_180890	143.173	-3.93989	0.513014	-7.6799	1.59217e-14	2.62255e-13	Rho GTPase activating protein 19
Smp_123670	954.394	-2.45209	0.319756	-7.66864	1.73836e-14	2.85508e-13	lysosomal acid phosphatase
Smp_203950	159.845	3.9405	0.514089	7.66502	1.78805e-14	2.93144e-13	retinol dehydrogenase 11
Smp_165520	42.7835	5.68735	0.744117	7.64309	2.12075e-14	3.4707e-13	Protein C6orf152
Smp_002080	1308.51	-2.54345	0.332851	-7.64142	2.14831e-14	3.50954e-13	S adenosylmethionine synthetase
Smp_193630	37.8237	6.89357	0.903025	7.63386	2.27819e-14	3.71511e-13	endoglycoceramidase
Smp_194800	52.0237	5.14627	0.674711	7.62737	2.39595e-14	3.90022e-13	ATP dependent RNA helicase Ddx1
Smp_066050	94.9003	-4.7393	0.622155	-7.61755	2.58538e-14	4.20113e-13	transcriptional enhancer factor TEF 1
Smp_199800	65.4293	-4.03177	0.529548	-7.61361	2.6655e-14	4.32366e-13	coiled coil domain containing protein 111
Smp_000040	746.202	1.90315	0.250389	7.60078	2.94354e-14	4.76625e-13	kinesin light chain
Smp_155420	417.878	2.23346	0.293965	7.59771	3.01416e-14	4.872e-13	thioredoxin domain containing protein 11
Smp_154930	270.156	-2.35702	0.310383	-7.59391	3.10384e-14	5.00815e-13	DNA polymerase delta subunit 3
Smp_160190	254.123	-3.21407	0.42345	-7.59019	3.19427e-14	5.14502e-13	primase, DNA, polypeptide 1 (49 kDa)
Smp_149820	110.824	3.69968	0.487945	7.58216	3.39849e-14	5.46436e-13	glycoprotein N acetylgalactosamine
Smp_019620	228.517	-2.4753	0.326694	-7.57683	3.54099e-14	5.68354e-13	hypothetical protein
Smp_210210	121.39	-4.59213	0.606161	-7.57576	3.57022e-14	5.72045e-13	tubulin tyrosine ligase
Smp_199770	168.029	3.4893	0.460978	7.56933	3.75156e-14	6.00054e-13	schwannomin interacting protein
Smp_042420	199.672	-2.59034	0.342382	-7.56566	3.85903e-14	6.1617e-13	histone H4 transcription factor
Smp_045640	22.4738	7.74768	1.02436	7.5634	3.92654e-14	6.25861e-13	transcription factor castor
Smp_028360	352.361	2.14037	0.283233	7.5569	4.12797e-14	6.56827e-13	tubulin epsilon chain
Smp_142290	64.1205	5.36798	0.710613	7.55402	4.2204e-14	6.70372e-13	hyperpolarization activated cyclic
Smp_083990	355.777	2.31646	0.307032	7.54469	4.5336e-14	7.18877e-13	cationic amino acid transporter
Smp_162060	156.196	4.39824	0.58299	7.54428	4.54784e-14	7.19891e-13	Nose resistant to fluoxetine protein 6
Smp_086330	570.977	2.62214	0.347795	7.53933	4.72397e-14	7.46485e-13	Myophilin
Smp_141000	554.815	-1.22637	0.162695	-7.53785	4.77798e-14	7.53722e-13	interleukin enhancer binding factor 2
Smp_029470	63.3229	2.85634	0.379154	7.53347	4.94102e-14	7.78105e-13	thimet oligopeptidase
Smp_165710	380.565	1.95005	0.259088	7.5266	5.20803e-14	8.18749e-13	hypothetical protein
Smp_158440	373.455	2.89784	0.385205	7.52286	5.35922e-14	8.41076e-13	Transcription initiation factor TFIID subunit 3
Smp_081920	211.765	4.62564	0.615331	7.51731	5.59129e-14	8.76e-13	hypothetical protein
Smp_173480	150.92	3.93862	0.524505	7.50921	5.94835e-14	9.30354e-13	hypothetical protein
Smp_019310	34.8539	4.15752	0.553733	7.50817	5.99606e-14	9.36221e-13	dynein light chain
Smp_170990	447.533	-3.09338	0.412109	-7.50621	6.08624e-14	9.48689e-13	vinculin
Smp_094500	65.2392	2.84204	0.379101	7.4968	6.53937e-14	1.01759e-12	choline dehydrogenase, mitochondrial
Smp_022810	385.526	1.68602	0.225018	7.49283	6.74056e-14	1.04712e-12	ras protein Rab 2B
Smp_155900	32.3941	5.19733	0.694175	7.48707	7.04307e-14	1.09227e-12	alkaline phosphatase
Smp_050430	360.189	2.38283	0.318981	7.47013	8.0115e-14	1.23828e-12	traB domain containing protein
Smp_004640	259.353	-1.81077	0.2424	-7.47019	8.00766e-14	1.23828e-12	DNA directed RNA polymerases I and III subunit
Smp_177240	51.4676	-3.07507	0.412378	-7.45692	8.85703e-14	1.36666e-12	twinkle protein, mitochondrial
Smp_211340	169.451	-2.45265	0.329786	-7.43709	1.02931e-13	1.58559e-12	e3 ubiquitin protein ligase RFWD3
Smp_127670	63.9796	-4.81888	0.648374	-7.43225	1.06765e-13	1.6419e-12	hypothetical protein
Smp_081570	429.641	1.81498	0.244277	7.42998	1.08614e-13	1.66753e-12	staphylococcal nuclease domain containing protein
Smp_032520	1424.09	1.77323	0.238744	7.42732	1.10824e-13	1.69862e-12	lysosome associated membrane glycoprotein
Smp_160080	547.846	-1.64099	0.221241	-7.41721	1.19611e-13	1.83025e-12	hypothetical protein
Smp_005740	35.9774	4.7802	0.646552	7.39338	1.43142e-13	2.18666e-12	Aquaporin 9 (AQP 9) (Small solute channel 1)
Smp_127890	133.569	-2.18079	0.295009	-7.39227	1.44341e-13	2.20132e-12	phosphatidylserine synthase 1
Smp_051320	210.425	-2.72035	0.368179	-7.38866	1.48314e-13	2.25816e-12	ap endonuclease
Smp_129510	127.565	-3.87197	0.524287	-7.38522	1.52204e-13	2.31355e-12	metallophosphoesterase domain containing protein
Smp_106130	1450.34	-1.03857	0.140853	-7.37343	1.66288e-13	2.52346e-12	stress 70 protein, mitochondrial
Smp_018930	160.252	-4.45503	0.604607	-7.36846	1.72612e-13	2.6151e-12	hypothetical protein
Smp_054220	555.719	1.69332	0.22986	7.36676	1.74828e-13	2.6443e-12	vacuolar ATP synthase subunit G
Smp_102210	45.158	5.00511	0.679487	7.36602	1.75802e-13	2.65467e-12	#N/A
Smp_028870	35.9735	4.44231	0.60356	7.36017	1.83674e-13	2.76898e-12	Zinc finger, C2H2 type domain containing protein
Smp_151320	73.2396	-3.88682	0.528468	-7.35488	1.91092e-13	2.87609e-12	targeting protein for Xklp2
Smp_051080	758.153	1.56638	0.213156	7.34854	2.00381e-13	3.01096e-12	clathrin light chain
Smp_169410	34.9874	-6.87097	0.935157	-7.34739	2.02111e-13	3.032e-12	hypothetical protein
Smp_065060	291.713	-1.73979	0.236807	-7.34689	2.02875e-13	3.0385e-12	1 pyrroline 5 carboxylate dehydrogenase
Smp_121950	44.1224	4.29787	0.585053	7.34612	2.04043e-13	3.051e-12	hypothetical protein
Smp_190720	50.8821	-2.87275	0.391188	-7.34365	2.0785e-13	3.10288e-12	#N/A
Smp_204600	39.9137	-4.38978	0.598082	-7.33976	2.13975e-13	3.18913e-12	invadolysin (M08 family)
Smp_102690	686.05	-1.71491	0.234053	-7.327	2.35359e-13	3.50215e-12	Argonaute
Smp_012350	236.71	1.76272	0.240706	7.32313	2.42254e-13	3.59892e-12	venom allergen-like (VAL) 11 protein
Smp_114620	141.178	2.97492	0.406531	7.31782	2.52027e-13	3.73806e-12	adenosinetriphosphatase
Smp_160880	145.341	4.49466	0.614633	7.31275	2.61736e-13	3.8758e-12	phosphatidylcholine sterol acyltransferase
Smp_020370	1159.07	1.40088	0.191703	7.30758	2.71993e-13	4.02121e-12	reticulon 1
Smp_026030	31.1585	-5.54202	0.758885	-7.30285	2.81728e-13	4.15843e-12	DNA repair and recombination protein RAD54B
Smp_063110	1142.23	-1.85227	0.253887	-7.29566	2.972e-13	4.37976e-12	Zinc finger MYM type protein 3
Smp_058880	125.717	-3.25685	0.446607	-7.29242	3.04446e-13	4.47936e-12	ovarian cancer associated gene 2 protein
Smp_127020	40.2356	-7.35364	1.00975	-7.28261	3.27431e-13	4.80983e-12	ets variant gene 4
Smp_011030	185.456	-3.2539	0.447037	-7.27882	3.36752e-13	4.93885e-12	heme binding protein 2
Smp_125640	679.515	1.93881	0.266379	7.27839	3.37835e-13	4.94684e-12	syntaxin 12
Smp_005350	381.996	2.22378	0.305578	7.27728	3.40619e-13	4.97965e-12	Calcium binding protein
Smp_075420	44.0958	5.16734	0.710562	7.27218	3.53726e-13	5.16305e-12	hypothetical protein
Smp_142970	80.4389	4.24829	0.584629	7.26664	3.68543e-13	5.37079e-12	palmitoyl protein thioesterase 1
Smp_057410	28.1082	4.85039	0.668259	7.25826	3.92111e-13	5.70519e-12	#N/A
Smp_039080	912.698	-1.46937	0.202601	-7.2525	4.09139e-13	5.94352e-12	FRA10AC1 protein
Smp_040990	52.8583	-3.60155	0.496662	-7.25152	4.12111e-13	5.97723e-12	Ribonuclease H2 subunit C
Smp_020770	1089.22	2.66723	0.367934	7.2492	4.19227e-13	6.07086e-12	dolichyl diphosphooligosaccharide protein
Smp_046910	80.7442	-4.42246	0.610498	-7.24402	4.35589e-13	6.29786e-12	DNA polymerase epsilon subunit 4
Smp_160740	627.817	-2.35769	0.326034	-7.23144	4.77902e-13	6.89878e-12	choline transporter protein 2
Smp_020090	128.321	-2.26385	0.313343	-7.22484	5.0171e-13	7.23108e-12	stem cell tumor
Smp_200800	2707.12	2.75811	0.382054	7.21916	5.23106e-13	7.52764e-12	hypothetical protein
Smp_047610	150.124	-4.61244	0.639347	-7.21431	5.42082e-13	7.78851e-12	cell division control protein 45
Smp_156960	64.7542	5.09296	0.707199	7.20159	5.95126e-13	8.53727e-12	nardilysin (M16 family)
Smp_126240	181.003	3.20066	0.444843	7.19504	6.24437e-13	8.94377e-12	twitchin
Smp_042770	298.204	2.88675	0.402272	7.17613	7.17149e-13	1.02557e-11	TBC1 domain family 0
Smp_066900	752.695	-1.61618	0.225261	-7.17469	7.24707e-13	1.03476e-11	innexin unc 9
Smp_005060	291.075	1.45982	0.203723	7.1657	7.73925e-13	1.10332e-11	hypothetical protein
Smp_127070	113.043	-4.35147	0.607455	-7.16344	7.86749e-13	1.11987e-11	origin recognition complex subunit
Smp_083680	454.626	-1.74452	0.243631	-7.16048	8.03954e-13	1.14259e-11	hypothetical protein
Smp_078030	341.796	1.97496	0.275962	7.15665	8.26741e-13	1.17315e-11	#N/A
Smp_123260	165.983	-3.31753	0.463818	-7.15265	8.51175e-13	1.20596e-11	AN1 type zinc finger and ubiquitin
Smp_122080	244.359	2.00521	0.280596	7.14627	8.91705e-13	1.26144e-11	hypothetical protein
Smp_163570	75.9547	3.26446	0.456895	7.14488	9.00752e-13	1.27228e-11	Ryanodine receptor
Smp_180600	248.866	3.11235	0.435879	7.1404	9.30588e-13	1.3124e-11	Insulin growth factor binding protein 7
Smp_158950	106.992	-4.87328	0.683162	-7.13341	9.79138e-13	1.37875e-11	serine:threonine protein kinase haspin
Smp_154940	31.8898	-5.85738	0.821771	-7.12776	1.02016e-12	1.43431e-11	hypothetical protein
Smp_123710	124.796	4.0301	0.566134	7.11864	1.09e-12	1.53017e-11	acetyl-CoA carboxylase
Smp_035260	58.1189	3.79053	0.532654	7.11632	1.10851e-12	1.55377e-11	epidermal growth factor receptor kinase
Smp_009230	137.121	4.28335	0.602361	7.11095	1.1525e-12	1.61297e-11	hypothetical protein
Smp_046810	374.789	-2.03951	0.28688	-7.10926	1.16669e-12	1.63034e-11	m phase inducer phosphatase(cdc25)
Smp_012810	149.752	3.00414	0.422698	7.10706	1.18539e-12	1.65146e-11	Four and a half LIM domains protein 3
Smp_147850	562.383	-1.90066	0.267426	-7.10721	1.18413e-12	1.65146e-11	large subunit gtpase 1
Smp_090240	319.049	2.22925	0.31379	7.10426	1.20971e-12	1.68278e-11	jnk:sapk associated protein
Smp_168870	195.052	4.14554	0.583738	7.10172	1.2321e-12	1.71134e-11	Rootletin
Smp_170010	108.21	4.18433	0.58986	7.09377	1.30503e-12	1.80989e-11	radial spoke 3
Smp_013570	54.3424	-4.32129	0.60956	-7.0892	1.34891e-12	1.86792e-11	hypothetical protein
Smp_129710	104.135	-5.37393	0.758255	-7.08723	1.36821e-12	1.8918e-11	Uveal autoantigen with coiled coil domains
Smp_122900	179.134	3.22641	0.455588	7.08186	1.42235e-12	1.96369e-11	beta arrestin
Smp_146160	111.567	-4.10111	0.579142	-7.08135	1.42758e-12	1.96797e-11	Fanconi anemia group D2 protein
Smp_069600	176.896	-4.04621	0.571709	-7.0774	1.46887e-12	2.02184e-11	ATP dependent DNA helicase Q4
Smp_099310	572.224	1.84122	0.260398	7.0708	1.54046e-12	2.11722e-11	protein transport protein SEC23
Smp_120350	416.687	-1.4331	0.202744	-7.06849	1.56626e-12	2.14945e-11	WD repeat containing protein 46
Smp_179710	173.857	-3.75157	0.531501	-7.05845	1.68374e-12	2.30723e-11	Maternal Effect Lethal family member (mel 32)
Smp_158510	46.9417	3.95095	0.559844	7.05723	1.69852e-12	2.32401e-11	diacylglycerol O-acyltransferase 1
Smp_155050	129.896	3.60237	0.510747	7.05315	1.74914e-12	2.38971e-11	agrin
Smp_101670	118.792	-2.86929	0.406919	-7.05125	1.77316e-12	2.41893e-11	5' AMP activated protein kinase subunit beta 2
Smp_123020	120.687	5.69558	0.808167	7.04753	1.8212e-12	2.48077e-11	protein serine:threonine kinase
Smp_091810	600.02	-1.93808	0.275042	-7.04648	1.83506e-12	2.49596e-11	#N/A
Smp_194720	47.0559	4.15825	0.592041	7.0236	2.16229e-12	2.93669e-11	hypothetical protein
Smp_075350	20.8214	6.51501	0.927876	7.02142	2.19632e-12	2.9785e-11	hypothetical protein
Smp_172960	46.8006	4.23151	0.602984	7.01762	2.25682e-12	3.05602e-11	serine type protease inhibitor
Smp_020130	90.6672	5.74344	0.81937	7.00958	2.39043e-12	3.23219e-11	hypothetical protein
Smp_180290	258.026	4.6617	0.665179	7.00819	2.41421e-12	3.25953e-11	membrane associated guanylate kinase ww and pdz
Smp_199580	26.9304	-5.42074	0.77397	-7.00381	2.49099e-12	3.35826e-11	hypothetical protein
Smp_169990	763.824	1.55247	0.221808	6.99917	2.57479e-12	3.46614e-11	Golgi reassembly stacking protein 2
Smp_061970	128.396	2.62296	0.375563	6.98408	2.86733e-12	3.85432e-11	GPI ethanolamine phosphate transferase 2
Smp_020340	149.299	3.2861	0.470651	6.98203	2.90951e-12	3.90529e-11	alpha glucosidase
Smp_021920	260.068	3.64084	0.521647	6.9795	2.96227e-12	3.97031e-11	paramyosin
Smp_193360	26.5423	-6.60712	0.946753	-6.97872	2.97881e-12	3.98665e-11	Fanconi anemia group I protein
Smp_133660	86.6758	-6.5486	0.938591	-6.97705	3.01443e-12	4.02845e-11	protein lin 9
Smp_016600	198.154	3.93686	0.565361	6.96343	3.3208e-12	4.43143e-11	solute carrier family 1
Smp_128810	133.621	2.91182	0.418387	6.95965	3.41124e-12	4.54551e-11	gpi mannosyltransferase 1
Smp_139240	57.4672	3.37053	0.484556	6.95592	3.50277e-12	4.66071e-11	cathepsin S (C01 family)
Smp_145360	105.003	2.81651	0.405471	6.94628	3.75044e-12	4.98304e-11	spermatogenesis associated protein 18
Smp_136540	160.433	3.38607	0.487962	6.9392	3.94336e-12	5.23179e-11	DNAJ
Smp_138290	63.1325	5.02892	0.724834	6.93803	3.97603e-12	5.26752e-11	hypothetical protein
Smp_149010	32.7227	5.77535	0.833846	6.92616	4.32409e-12	5.72038e-11	protocadherin gamma b
Smp_039300	94.9941	3.16052	0.456413	6.92469	4.36939e-12	5.772e-11	E3 ubiquitin protein ligase TRIM56
Smp_080210	151.128	3.05635	0.441638	6.92048	4.50114e-12	5.9375e-11	alpha tocopherol transfer protein
Smp_137520	106.623	2.2816	0.329982	6.91432	4.70099e-12	6.18335e-11	threonine dehydratase:deaminase
Smp_084380	501.479	-2.02757	0.293236	-6.91446	4.69659e-12	6.18335e-11	Cleavage and polyadenylation specificity factor
Smp_024380	165.769	-1.9042	0.275602	-6.90926	4.87205e-12	6.39919e-11	hypothetical protein
Smp_146940	114.089	3.61047	0.52271	6.90723	4.94214e-12	6.48197e-11	innexin
Smp_059690	517.488	1.50116	0.217469	6.90283	5.09757e-12	6.67628e-11	NF kappa B inhibitor interacting Ras
Smp_093450	317.421	-2.38782	0.346055	-6.90012	5.19599e-12	6.7955e-11	u3 small nucleolar rna associated protein 6
Smp_127650	503.422	2.14961	0.311635	6.89786	5.27933e-12	6.89467e-11	Secretory carrier associated membrane protein 2
Smp_073290	895.376	-1.83895	0.266737	-6.89424	5.41549e-12	7.06245e-11	serine:threonine protein phosphatase 4
Smp_099770	55.4596	4.541	0.659389	6.88668	5.71107e-12	7.43735e-11	tetraspanin
Smp_042160	8239.9	2.33779	0.339899	6.8779	6.07429e-12	7.89916e-11	fructose-bisphosphate aldolase
Smp_081470	185.106	3.10217	0.451077	6.87725	6.10185e-12	7.92377e-11	hypothetical protein
Smp_121160	81.8123	-2.46479	0.358518	-6.87493	6.20198e-12	8.04243e-11	hypothetical protein
Smp_018160	188.944	-1.84854	0.269028	-6.87117	6.36755e-12	8.24548e-11	PIH1 domain containing protein 1
Smp_004690	40.0019	5.56158	0.809539	6.87005	6.41792e-12	8.29901e-11	hypothetical protein
Smp_174510	34.4163	5.2715	0.767705	6.86658	6.57614e-12	8.49163e-11	dynein light chain
Smp_049170	475.938	2.54247	0.370292	6.86612	6.59727e-12	8.50695e-11	alpha endosulfine
Smp_130930	22.548	5.92944	0.865252	6.85284	7.23965e-12	9.32219e-11	multiple C2 and transmembrane domain containing protein
Smp_061310	335.521	1.72736	0.252592	6.83854	8.00043e-12	1.02874e-10	hypothetical protein
Smp_176270	169.307	2.71924	0.397892	6.83412	8.25106e-12	1.05948e-10	syntaxin 5
Smp_149050	452.013	2.11707	0.309912	6.8312	8.42093e-12	1.07978e-10	XTP3 transactivated gene B protein
Smp_140590	37.8454	5.69622	0.835574	6.81714	9.28716e-12	1.1892e-10	hypothetical protein
Smp_105450	75.6241	3.49126	0.512542	6.81166	9.64774e-12	1.23365e-10	saposin containing protein
Smp_067060	171.771	3.5996	0.52875	6.80775	9.91339e-12	1.26585e-10	Cathepsin B1 isotype 2
Smp_153170	53.899	3.26675	0.479913	6.80697	9.96791e-12	1.27105e-10	striated muscle specific
Smp_169970	100.563	-4.91378	0.722536	-6.80074	1.0408e-11	1.32532e-10	kinetochore protein ndc80
Smp_141390	79.7006	3.92483	0.577469	6.7966	1.07114e-11	1.36207e-10	innexin unc 9
Smp_125890	197.64	-3.01916	0.444565	-6.79128	1.11145e-11	1.41138e-10	dna photolyase
Smp_154760	96.5105	3.40158	0.501258	6.78609	1.15215e-11	1.46103e-10	egf domain protein
Smp_147300	124.487	-3.17536	0.468024	-6.78461	1.16401e-11	1.47404e-10	SAM domain and HD domain containing protein 1
Smp_133990	43.1907	-6.78997	1.00203	-6.77622	1.2336e-11	1.56001e-10	DNA topoisomerase 2 binding protein 1
Smp_195120	109.741	-3.88547	0.573669	-6.77302	1.26122e-11	1.59274e-10	KRAB A domain containing protein
Smp_089100	326.938	1.99179	0.294161	6.7711	1.27805e-11	1.61178e-10	gamma glutamyltransferase 7
Smp_083710	75.9078	-3.47227	0.513268	-6.76503	1.33282e-11	1.67848e-10	Fanconi anemia, complementation group M
Smp_172340	24.489	-6.14666	0.908619	-6.76484	1.33459e-11	1.67848e-10	hypothetical protein
Smp_126000	38.6096	5.81032	0.85948	6.76027	1.37734e-11	1.72988e-10	hypothetical protein
Smp_164820	589.819	-1.59982	0.236782	-6.75651	1.41351e-11	1.77288e-10	hypothetical protein
Smp_045550	87.9614	4.5059	0.667323	6.75221	1.45611e-11	1.82381e-10	annexin
Smp_163360	161.038	4.37311	0.64788	6.74988	1.47966e-11	1.85079e-10	dystrophin
Smp_019840	487.268	-2.00927	0.297897	-6.74484	1.53192e-11	1.91355e-10	DNA ligase 1
Smp_048620	293.034	-1.50591	0.223373	-6.7417	1.56542e-11	1.95273e-10	exosome complex component RRP45
Smp_133700	176.326	2.68808	0.398781	6.74075	1.57573e-11	1.96293e-10	UDP glucose:glycoprotein glucosyltransferase 1
Smp_028050	56.0965	-5.41307	0.803423	-6.73751	1.61123e-11	2.00443e-10	hypothetical protein
Smp_169510	64.7723	3.4016	0.505053	6.73512	1.63793e-11	2.03489e-10	PI3kinase
Smp_196250	115.42	4.02199	0.597579	6.73046	1.69122e-11	2.09825e-10	supervillin
Smp_177080	392.331	1.50066	0.222991	6.72971	1.70003e-11	2.10634e-10	alpha 1,3 mannosyltransferase ALG2
Smp_144770	313.787	2.61253	0.388411	6.72621	1.74144e-11	2.15474e-10	hypothetical protein
Smp_018710	472.283	1.26546	0.188354	6.71855	1.8354e-11	2.26794e-10	DDB1 and CUL4 associated factor 7
Smp_026230	2665.53	2.9765	0.443597	6.70991	1.94746e-11	2.40318e-10	hypothetical protein
Smp_033760	498.403	-1.33185	0.198671	-6.7038	2.03063e-11	2.50244e-10	hypothetical protein
Smp_120800	319.422	2.14514	0.320079	6.70188	2.05748e-11	2.53213e-10	DNAj subfamily C member
Smp_203090	33.2006	4.90134	0.731374	6.70155	2.06227e-11	2.53463e-10	hypothetical protein
Smp_024870	147.422	3.66518	0.547011	6.70037	2.07886e-11	2.5516e-10	hypothetical protein
Smp_103140	52.5394	4.44546	0.663754	6.69745	2.12092e-11	2.59975e-10	alpha tubulin
Smp_210130	282.574	3.65289	0.545597	6.6952	2.1537e-11	2.63642e-10	C Jun amino terminal kinase interacting protein
Smp_022630	356.301	2.61942	0.391346	6.69337	2.18095e-11	2.66267e-10	testis expressed sequence 2 protein
Smp_098850	149.313	-3.07325	0.459148	-6.69337	2.1809e-11	2.66267e-10	interferon stimulated 20 kDa exonuclease
Smp_160360	39.3857	4.7319	0.707132	6.69167	2.20634e-11	2.69009e-10	sodium:chloride dependent neurotransmitter
Smp_023620	475.712	2.14817	0.321385	6.6841	2.3235e-11	2.82919e-10	FERM domain containing protein 5
Smp_020070	77.3877	4.89702	0.733381	6.67732	2.43345e-11	2.95914e-10	hypothetical protein
Smp_149610	231.044	-2.99649	0.449346	-6.66856	2.58329e-11	3.13719e-10	hypothetical protein
Smp_176890	43.8605	5.03176	0.754724	6.66702	2.61048e-11	3.16603e-10	hypothetical protein
Smp_000470	858.002	-1.37659	0.206546	-6.66478	2.6506e-11	3.21044e-10	carbohydrate kinase domain containing protein
Smp_162340	29.4255	-4.19849	0.630293	-6.66117	2.71663e-11	3.28608e-10	serine:threonine protein kinase ATR
Smp_167270	32.1922	4.87735	0.733115	6.65292	2.87339e-11	3.468e-10	hypothetical protein
Smp_155390	94.3916	-5.35994	0.80566	-6.65286	2.87457e-11	3.468e-10	hypothetical protein
Smp_024150	849.578	1.23778	0.186066	6.65238	2.88384e-11	3.47462e-10	UBX domain containing protein 2
Smp_106040	64.1837	-3.73264	0.561146	-6.65182	2.89496e-11	3.48344e-10	Structure specific endonuclease SLX1
Smp_124410	90.8135	3.32499	0.500469	6.64374	3.05826e-11	3.67511e-10	fatty acid amide hydrolase
Smp_140820	84.9727	3.92551	0.590897	6.64331	3.06724e-11	3.68109e-10	hypothetical protein
Smp_057600	68.3331	-3.71622	0.559767	-6.63886	3.16114e-11	3.78883e-10	hypothetical protein
Smp_042790	194.715	1.85496	0.279488	6.637	3.20124e-11	3.83189e-10	dolichol phosphate mannosyltransferase
Smp_189960	205.082	-2.26651	0.341875	-6.62965	3.36477e-11	4.02239e-10	Nuclear pore complex protein Nup153
Smp_034090	213.433	-2.11354	0.31909	-6.62367	3.50395e-11	4.18332e-10	hypothetical protein
Smp_144170	128.269	-2.35128	0.355359	-6.61664	3.67444e-11	4.38117e-10	nuclear receptor subfamily 1
Smp_127490	119.742	-3.2777	0.495395	-6.61633	3.68218e-11	4.3847e-10	blooms syndrome DNA helicase
Smp_094190	47.3149	4.7278	0.714962	6.61266	3.77473e-11	4.48909e-10	serine:threonine protein kinase NIM1
Smp_178260	87.0994	-3.79895	0.574613	-6.61131	3.80929e-11	4.52433e-10	DNA polymerase alpha catalytic subunit
Smp_147230	62	-3.67031	0.555311	-6.60947	3.85702e-11	4.5751e-10	ATP dependent DNA helicase PIF1
Smp_176640	526.963	1.6045	0.242838	6.6073	3.91398e-11	4.63668e-10	Zinc finger, RING type,domain containing protein
Smp_006040	369.076	2.53599	0.383934	6.60528	3.96766e-11	4.69421e-10	hypothetical protein
Smp_085540	1340.25	3.55829	0.538724	6.60505	3.97397e-11	4.69562e-10	myosin heavy chain
Smp_150320	1189.75	-1.20842	0.182977	-6.6042	3.99675e-11	4.71647e-10	tetratricopeptide repeat protein 14
Smp_151020	156.687	2.90003	0.439188	6.60316	4.02475e-11	4.74342e-10	transmembrane protein 17
Smp_147070	22.4199	5.74272	0.86992	6.60144	4.0719e-11	4.79284e-10	sodium coupled neutral amino acid
Smp_045500	50.2912	3.61466	0.548401	6.59128	4.36053e-11	5.126e-10	annexin
Smp_151290	343.936	1.97744	0.300161	6.58794	4.45983e-11	5.23603e-10	multidrug and toxin extrusion protein 2
Smp_175280	16.2247	5.71927	0.869225	6.57974	4.71281e-11	5.52596e-10	hypothetical protein
Smp_186980	394.263	-2.46906	0.375413	-6.57692	4.80304e-11	5.62458e-10	flap endonuclease 1
Smp_085490	328.21	-1.34732	0.204874	-6.57631	4.82254e-11	5.63607e-10	hypothetical protein
Smp_153660	99.1912	-3.90068	0.593149	-6.57623	4.82513e-11	5.63607e-10	G1:S specific cyclin D2
Smp_213060	249.455	-2.28562	0.347579	-6.57583	4.83836e-11	5.64434e-10	polycomb group RING finger protein 2
Smp_164500	502.259	1.89577	0.288355	6.57445	4.88338e-11	5.68963e-10	golgi resident protein gcp60
Smp_078710	265.774	2.23008	0.339318	6.57223	4.9566e-11	5.76762e-10	hypothetical protein
Smp_164590	113.159	3.57567	0.544607	6.56559	5.18264e-11	6.02302e-10	fibrillar collagen chain FAp1 alpha
Smp_044250	294.928	1.22294	0.186284	6.56489	5.2073e-11	6.04402e-10	STAM binding protein
Smp_182770	458.181	4.3567	0.664604	6.55534	5.55141e-11	6.43528e-10	hypothetical protein
Smp_027970	141.661	-2.2769	0.347423	-6.5537	5.61284e-11	6.49829e-10	pre mRNA splicing factor ATP dependent
Smp_135360	97.6438	-4.29141	0.654878	-6.553	5.63942e-11	6.52084e-10	serine:threonine protein kinase 12 B
Smp_148100	207.061	6.135	0.937102	6.54678	5.8792e-11	6.78955e-10	hypothetical protein
Smp_028730	547.801	2.03206	0.310734	6.53954	6.17075e-11	7.11729e-10	GDP mannose pyrophosphorylase B
Smp_128970	663.136	-1.35311	0.206934	-6.53885	6.19925e-11	7.14119e-10	inhibitor of growth protein 3
Smp_176000	71.7624	-4.48287	0.685831	-6.5364	6.30169e-11	7.2501e-10	abnormal spindle microcephaly associated
Smp_091660	149.386	2.38946	0.365704	6.53386	6.40943e-11	7.36483e-10	hypothetical protein
Smp_198870	318.093	-1.60684	0.246127	-6.52851	6.64272e-11	7.62335e-10	long chain fatty acid coenzyme A ligase
Smp_045750	219.198	-1.87961	0.288103	-6.52409	6.84166e-11	7.84185e-10	cak assembly factor
Smp_175580	45.4017	3.42448	0.525347	6.51851	7.10108e-11	8.12905e-10	hypothetical protein
Smp_170980	113.523	3.45637	0.530531	6.51493	7.27229e-11	8.31469e-10	hypothetical protein
Smp_007000	63.6311	-3.02525	0.464707	-6.51	7.51488e-11	8.58136e-10	DNA replication complex GINS protein PSF1
Smp_025830	24.5114	4.23186	0.650713	6.50341	7.85185e-11	8.95501e-10	adp ribosyl cyclase
Smp_111980	64.321	-2.58008	0.397381	-6.49272	8.43023e-11	9.60273e-10	hypothetical protein
Smp_147950	604.6	-1.56843	0.241626	-6.49115	8.51848e-11	9.69123e-10	bromodomain containing 2
Smp_155330	236.303	2.99337	0.461569	6.4852	8.86127e-11	1.00687e-09	cyclin dependent kinase 14
Smp_138050	1748	-1.31321	0.202687	-6.47899	9.23385e-11	1.04791e-09	polypyrimidine tract binding protein
Smp_157240	267.924	3.50364	0.541038	6.47578	9.43208e-11	1.06909e-09	cyclin dependent kinase 1
Smp_137410	134.669	2.44933	0.37846	6.47183	9.68216e-11	1.09608e-09	calpain A
Smp_141380	181.974	-2.23826	0.345983	-6.46929	9.84616e-11	1.11327e-09	serine:threonine protein kinase VRK1
Smp_194830	48.4867	3.61001	0.558423	6.46465	1.01531e-10	1.14657e-09	SmKK7
Smp_122050	25.7942	4.9287	0.762451	6.46428	1.01779e-10	1.14795e-09	lag1 longevity assurance 1
Smp_018360	787.201	1.75324	0.271257	6.46339	1.02382e-10	1.15333e-09	pi plc x domain containing protein 3
Smp_074700	792.646	2.16175	0.334486	6.46291	1.02711e-10	1.15563e-09	Translocon associated protein subunit gamma
Smp_031680	16.1439	6.01317	0.930679	6.46106	1.0397e-10	1.16836e-09	nicotinic acetylcholine receptor
Smp_123650	26.6675	4.72283	0.732594	6.44672	1.14298e-10	1.28284e-09	peroxidasin
Smp_020480	113.908	-2.35301	0.365014	-6.44636	1.14568e-10	1.28431e-09	hypothetical protein
Smp_152580	19.4756	4.60596	0.715189	6.4402	1.19314e-10	1.33588e-09	MEG-5
Smp_024860	168.385	-3.75724	0.58369	-6.43705	1.2182e-10	1.36227e-09	Basic helix loop helix transcription factor
Smp_154040	526.557	1.49318	0.232371	6.42582	1.3116e-10	1.46494e-09	sugar nucleotide epimerase
Smp_170050	20.8745	4.59676	0.715834	6.42154	1.34902e-10	1.5049e-09	hypothetical protein
Smp_163490	57.9357	5.57885	0.869231	6.41814	1.3795e-10	1.53704e-09	#N/A
Smp_132670	727.704	2.54484	0.396703	6.41498	1.40838e-10	1.56732e-09	myosin regulatory light chain 2 smooth muscle
Smp_129610	31.0665	3.74778	0.584346	6.41363	1.42095e-10	1.57938e-09	malate dehydrogenase
Smp_152890	24.6986	5.60641	0.874203	6.41317	1.42528e-10	1.58229e-09	hypothetical protein
Smp_142490	48.2405	3.30903	0.516241	6.40986	1.45653e-10	1.61503e-09	Transmembrane protein 45B
Smp_136930	270.817	2.55932	0.399906	6.3998	1.55576e-10	1.72297e-09	hypothetical protein
Smp_091730	956.807	1.84434	0.288324	6.39674	1.58731e-10	1.7558e-09	sorting nexin
Smp_032640	112.234	2.18447	0.341557	6.39563	1.5989e-10	1.76648e-09	thiamin pyrophosphokinase 1
Smp_083240	319.516	2.19981	0.344045	6.39396	1.61646e-10	1.78374e-09	hypothetical protein
Smp_152960	13.0671	6.37752	0.997993	6.39035	1.65509e-10	1.82418e-09	rab effector MyRIP
Smp_076650	63.6791	-2.71638	0.425143	-6.38931	1.66631e-10	1.83434e-09	ORAI calcium release activated calcium modulator
Smp_055340	610.556	-1.49996	0.23509	-6.38035	1.76684e-10	1.94268e-09	protein lin 9
Smp_030000	1597.71	1.73694	0.272285	6.37912	1.78105e-10	1.95596e-09	leucine aminopeptidase (M17 family)
Smp_179610	652.063	2.18989	0.344071	6.36466	1.95726e-10	2.1469e-09	GTPase activating protein ZNF289
Smp_085150	631.622	1.37333	0.215787	6.36429	1.96201e-10	2.14954e-09	phosphoglucomutase 2
Smp_154180	14.0084	6.24623	0.981548	6.36365	1.97013e-10	2.15587e-09	25 kDa integral membrane protein
Smp_129560	679.098	-2.04133	0.320826	-6.36273	1.98195e-10	2.16623e-09	hypothetical protein
Smp_094340	1041.87	1.19267	0.187712	6.35374	2.10136e-10	2.29401e-09	hypothetical protein
Smp_159590	124.794	3.27437	0.515365	6.3535	2.10476e-10	2.29498e-09	hypothetical protein
Smp_121880	417.051	1.43013	0.225126	6.35259	2.11723e-10	2.30585e-09	hypothetical protein
Smp_169470	339.813	1.68134	0.264731	6.35111	2.13768e-10	2.32536e-09	RAB18, member RAS oncogene family
Smp_132170	290.545	-1.78378	0.280951	-6.34906	2.16629e-10	2.3537e-09	jumonji domain containing protein
Smp_163190	171.912	-1.7288	0.272322	-6.34836	2.17621e-10	2.36168e-09	cell cycle checkpoint protein rad17
Smp_045070	315.756	-1.92708	0.303638	-6.34664	2.20071e-10	2.38545e-09	U3 small nucleolar RNA associated protein 15
Smp_019030	1211.28	-1.41376	0.222775	-6.34614	2.20785e-10	2.39036e-09	Cathepsin C
Smp_046790	66.0596	-2.50545	0.39494	-6.34387	2.24065e-10	2.42301e-09	solute carrier family 2 facilitated glucose
Smp_143690	130.241	3.06822	0.483873	6.34096	2.28339e-10	2.46633e-09	feline leukemia virus subgroup C
Smp_135560	236.108	2.76191	0.436095	6.33328	2.4001e-10	2.58935e-09	collagen alpha 2(I) chain
Smp_139160	40.9605	3.99609	0.631014	6.33282	2.40727e-10	2.59403e-09	SmCL2 peptidase (C01 family)
Smp_157380	81.2586	3.74743	0.592036	6.32974	2.45575e-10	2.64317e-09	hypothetical protein
Smp_070630	61.196	3.63309	0.574503	6.32388	2.55074e-10	2.74219e-09	#N/A
Smp_069130	4718.68	-1.19507	0.189144	-6.31832	2.64426e-10	2.83941e-09	heat shock protein 105 kDa
Smp_178360	190.141	2.1425	0.339343	6.31367	2.72501e-10	2.9227e-09	E3 UFM1 protein ligase 1
Smp_126940	31.5852	5.32079	0.84279	6.3133	2.73146e-10	2.9262e-09	hypothetical protein
Smp_210740	584.641	1.66056	0.263222	6.3086	2.81565e-10	3.01288e-09	Actin protein 3
Smp_175770	77.2547	-2.09081	0.331572	-6.30576	2.86787e-10	3.06519e-09	hypothetical protein
Smp_133430	13.5746	6.80266	1.0797	6.30049	2.96697e-10	3.16741e-09	hypothetical protein
Smp_077180	72.3547	-4.19452	0.666446	-6.29385	3.09683e-10	3.30221e-09	serine:threonine protein kinase Chk1
Smp_122960	253.079	-1.59969	0.25425	-6.29179	3.13825e-10	3.34249e-09	ubiquitin specific peptidase 30 (C19 family)
Smp_032490	200.723	-3.5316	0.561324	-6.29154	3.14322e-10	3.3439e-09	tropomyosin
Smp_077850	36.1105	4.80422	0.763808	6.28984	3.17803e-10	3.37703e-09	actin
Smp_127270	40.8583	3.31955	0.527911	6.28807	3.2143e-10	3.41161e-09	Cytochrome b561:ferric reductase
Smp_082800	456.787	1.07929	0.17165	6.28776	3.2208e-10	3.41457e-09	vesicle protein sorting associated
Smp_134910	203.256	3.77612	0.601193	6.28104	3.36306e-10	3.56128e-09	serine:threonine protein kinase
Smp_105970	2685.63	-1.90115	0.302813	-6.27829	3.42317e-10	3.62075e-09	Caprin 1
Smp_134480	267.409	-1.84307	0.293634	-6.27676	3.45711e-10	3.65244e-09	hypothetical protein
Smp_146760	38.8869	5.06543	0.807307	6.27447	3.50827e-10	3.70223e-09	hypothetical protein
Smp_072190	2850.47	2.14714	0.342287	6.27292	3.54329e-10	3.73489e-09	membrane associated protein 29
Smp_038930	527.678	-1.38543	0.220929	-6.27095	3.58861e-10	3.77833e-09	pre rRNA processing protein TSR1
Smp_075800	179.175	3.1747	0.506344	6.26985	3.61391e-10	3.80061e-09	hemoglobinase
Smp_105960	283.125	-2.00398	0.31974	-6.26752	3.66843e-10	3.85353e-09	dnaj subfamily c
Smp_126540	317.936	2.8884	0.46107	6.26455	3.73909e-10	3.92327e-09	hypothetical protein
Smp_136480	197.053	3.86865	0.617662	6.26337	3.76734e-10	3.9484e-09	CCAAT box DNA binding protein subunit B
Smp_123490	164.307	-1.94573	0.310707	-6.26228	3.79399e-10	3.97179e-09	nicotinamide mononucleotide adenylyltransferase
Smp_104600	353.28	-1.73591	0.277308	-6.25985	3.85351e-10	4.0295e-09	hypothetical protein
Smp_174110	60.5044	3.28565	0.525013	6.25822	3.8939e-10	4.06711e-09	protein phosphatase 1 regulatory inhibitor
Smp_045220	656.99	2.55019	0.407634	6.25607	3.94797e-10	4.1189e-09	myosin light chain
Smp_147500	107.527	-2.85027	0.456125	-6.24888	4.13419e-10	4.30829e-09	MAGUK p55 subfamily
Smp_119980	377.027	1.10959	0.17802	6.23294	4.57767e-10	4.76503e-09	Translocation protein SEC62
Smp_025370	28.359	4.43319	0.711567	6.23017	4.65928e-10	4.84449e-09	lipopolysaccharide induced
Smp_173820	50.6873	-3.68867	0.592347	-6.22721	4.74815e-10	4.93131e-09	equilibrative nucleoside transporter
Smp_152020	171.313	1.55665	0.250027	6.22593	4.78719e-10	4.96623e-09	SID1 transmembrane family
Smp_146360	66.601	-2.80832	0.45126	-6.22329	4.86838e-10	5.04476e-09	twinkle protein mitochondrial
Smp_043990	1609.86	1.35949	0.218468	6.22284	4.88227e-10	5.05345e-09	basigin
Smp_042810	84.9361	-3.56492	0.573366	-6.21753	5.05047e-10	5.22166e-09	chromosome transmission fidelity protein 18
Smp_156970	155.913	5.10356	0.821025	6.21608	5.09723e-10	5.26408e-09	cadherin
Smp_148280	180.592	-1.71256	0.275551	-6.21503	5.1314e-10	5.29342e-09	hypothetical protein
Smp_085010	24.1481	4.6137	0.742607	6.21283	5.20375e-10	5.36202e-09	cathepsin B peptidase (C01 family)
Smp_163230	237.226	-2.25486	0.362951	-6.21258	5.21223e-10	5.36475e-09	propionyl coenzyme A carboxylase beta chain
Smp_049150	825.539	-1.22592	0.197466	-6.20829	5.35639e-10	5.50695e-09	glutamine oxaloacetic transaminase
Smp_123010	113.561	3.00913	0.485056	6.20368	5.51588e-10	5.66458e-09	high affinity cationic amino acid transporter 1
Smp_068120	210.256	2.17946	0.351355	6.20303	5.53872e-10	5.68168e-09	aryl hydrocarbon receptor interacting
Smp_140690	94.2509	-2.73613	0.441651	-6.19523	5.82012e-10	5.96368e-09	DNA directed RNA polymerase I subunit RPA2
Smp_074460	18.5346	6.42043	1.03764	6.18754	6.11107e-10	6.25482e-09	tegument-allergen-like protein
Smp_025410	130.703	2.22172	0.359321	6.1831	6.28552e-10	6.42621e-09	calcium dependent mitochondrial carrier protein
Smp_176350	88.9432	2.82789	0.457945	6.17517	6.60913e-10	6.74955e-09	contactin
Smp_035560	65.2995	2.87143	0.465145	6.1732	6.69212e-10	6.82671e-09	hypothetical protein
Smp_210430	3848.14	1.60255	0.259676	6.17133	6.77165e-10	6.90017e-09	ras protein Rab 1A
Smp_084270	42.0388	3.78996	0.614222	6.17034	6.81446e-10	6.9361e-09	rhodopsin orphan GPCR
Smp_142050	318.86	2.57045	0.416666	6.16909	6.86837e-10	6.98322e-09	Serine/Threonine Kinase, CMGC Group, MAPK family, ERK subfamily
Smp_149970	18.8225	4.5613	0.739532	6.16782	6.92378e-10	7.03178e-09	hypothetical protein
Smp_148990	899.905	-1.3292	0.21553	-6.1671	6.95544e-10	7.05612e-09	Nucleolar protein 5
Smp_148150	654.286	-1.58434	0.256914	-6.16682	6.9679e-10	7.06096e-09	Double strand break repair protein rad21
Smp_170200	125.473	2.14801	0.348722	6.15967	7.28949e-10	7.3787e-09	alpha tocopherol transfer protein
Smp_161380	129.552	-2.07107	0.336358	-6.15733	7.39817e-10	7.48046e-09	DNA polymerase gamma
Smp_002160	209.867	-1.72603	0.280337	-6.157	7.41355e-10	7.48777e-09	dna methyltransferase 1 associated protein 1
Smp_171030	127.996	-3.08858	0.501755	-6.15555	7.48177e-10	7.54836e-09	Dehydrogenase:reductase SDR family
Smp_158520	10.2451	5.70747	0.927479	6.15375	7.56734e-10	7.62632e-09	diacylglycerol O acyltransferase
Smp_154680	26.5784	4.84244	0.787101	6.15225	7.63932e-10	7.69042e-09	glycosyltransferase 14 family member
Smp_169560	353.736	2.58655	0.420463	6.15167	7.66693e-10	7.70132e-09	subfamily M23B non peptidase ue
Smp_031270	410.624	-1.40927	0.229087	-6.1517	7.66571e-10	7.70132e-09	hypothetical protein
Smp_126910	387.894	-1.92916	0.313698	-6.14975	7.76072e-10	7.78701e-09	periodic tryptophan protein 2
Smp_166000	106.618	-2.16766	0.35283	-6.14365	8.06446e-10	8.08295e-09	hypothetical protein
Smp_074390	231.174	-2.93291	0.478957	-6.12355	9.15124e-10	9.16222e-09	eukaryotic translation initiation factor
Smp_017720	27.6025	-4.73996	0.774962	-6.11638	9.57266e-10	9.5737e-09	zinc finger protein
Smp_117920	16.3767	4.54486	0.743254	6.11482	9.66665e-10	9.65718e-09	steroid dehydrogenase
Smp_163520	37.8741	4.17406	0.682784	6.1133	9.75919e-10	9.73904e-09	hypothetical protein
Smp_124040	64.7593	4.67124	0.764382	6.11113	9.89274e-10	9.86159e-09	FMRFamide activated amiloride sensitive sodium
Smp_130100	165.455	3.37862	0.553642	6.10255	1.04393e-09	1.03951e-08	saposin containing protein
Smp_069120	93.4523	4.57688	0.750406	6.09921	1.06594e-09	1.06028e-08	synaptotagmin 2
Smp_157350	86.7789	3.10399	0.509198	6.09584	1.08864e-09	1.08169e-08	serine:threonine protein kinase ULK2
Smp_180380	203.914	-1.80762	0.296572	-6.09504	1.09412e-09	1.08596e-08	origin recognition complex protein 1
Smp_074000	3428.99	2.03364	0.333803	6.09232	1.11285e-09	1.10336e-08	hypothetical protein
Smp_210110	24.3529	-5.78956	0.952028	-6.08129	1.1922e-09	1.18075e-08	mitotic checkpoint serine:threonine protein
Smp_090870	789.586	1.08336	0.178254	6.07763	1.21969e-09	1.20667e-08	protein sec13
Smp_039670	865.642	-1.68257	0.277185	-6.07022	1.27735e-09	1.26236e-08	Cyclin L1
Smp_138700	323.903	-2.38127	0.392797	-6.06233	1.34162e-09	1.32445e-08	armadillo repeat containing protein 6
Smp_128220	45.7504	3.98923	0.65868	6.05641	1.39197e-09	1.37268e-08	neurogenic locus notch
Smp_099890	1616.5	1.53783	0.253927	6.0562	1.39376e-09	1.37297e-08	Receptor expression enhancing protein 5
Smp_150350	29.9777	4.35727	0.719578	6.05531	1.40152e-09	1.37892e-08	synaptotagmin XIV
Smp_060180	424.294	-1.09086	0.180153	-6.05516	1.4028e-09	1.37892e-08	nucleoporin seh1 (sec13 protein)
Smp_089060	773.951	-1.36738	0.225844	-6.05452	1.4084e-09	1.38294e-08	Eukaryotic translation initiation factor 4H
Smp_142850	443.336	1.80312	0.297874	6.05331	1.41902e-09	1.39188e-08	hypothetical protein
Smp_105680	2579.94	1.96073	0.32418	6.04827	1.46407e-09	1.43454e-08	dolichyl diphosphooligosaccharide protein
Smp_044750	213.006	2.02236	0.334633	6.04352	1.50786e-09	1.47587e-08	marvel containing potential lipid
Smp_142820	102.996	-4.10452	0.679181	-6.04333	1.50961e-09	1.47601e-08	hypothetical protein
Smp_075400	137.854	3.98214	0.659213	6.04074	1.53406e-09	1.49832e-08	hypothetical protein
Smp_178850	1066.05	-1.51047	0.25088	-6.02067	1.73694e-09	1.69467e-08	poly(A) polymerase
Smp_156750	51.2344	-4.86232	0.807641	-6.02039	1.73993e-09	1.69578e-08	hypothetical protein
Smp_015090	1044.52	2.10388	0.349817	6.01422	1.80759e-09	1.75986e-08	coatomer subunit beta'
Smp_205270	30.603	4.09055	0.6806	6.01022	1.85276e-09	1.80193e-08	ring finger protein 11 (sid 1669) (nedd4 ww
Smp_125500	216.151	-1.71419	0.285576	-6.00257	1.94223e-09	1.88694e-08	prenylcysteine oxidase
Smp_136430	11.1193	6.49646	1.08293	5.99897	1.98579e-09	1.92722e-08	hypothetical protein
Smp_138300	148.439	-2.789	0.465232	-5.99486	2.03664e-09	1.97449e-08	hypothetical protein
Smp_152180	245.673	2.88405	0.481106	5.99463	2.03951e-09	1.97519e-08	fad NAD binding oxidoreductases
Smp_157180	21.3419	-5.15128	0.861237	-5.98126	2.21413e-09	2.14204e-08	hypothetical protein
Smp_061570	222.195	-1.5747	0.263914	-5.96672	2.42064e-09	2.33936e-08	Mediator of RNA polymerase II transcription
Smp_084090	34.398	4.47459	0.751635	5.95314	2.63051e-09	2.53951e-08	hypothetical protein
Smp_137430	673.649	-1.00735	0.169252	-5.95178	2.6524e-09	2.55795e-08	splicing factor 3b subunit 3
Smp_198180	114.159	-2.40212	0.403696	-5.95032	2.67625e-09	2.57824e-08	DNA-methyltransferase 2 isoform 1
Smp_202980	86.9259	2.66097	0.447904	5.94094	2.83398e-09	2.72734e-08	hypothetical protein
Smp_168980	28.4251	4.53307	0.763795	5.93492	2.93982e-09	2.82623e-08	adenylate cyclase
Smp_047400	136.829	-2.46859	0.416142	-5.9321	2.99092e-09	2.87235e-08	hypothetical protein
Smp_205720	15.4138	5.00138	0.843955	5.92612	3.1018e-09	2.97572e-08	universal stress protein in QAH:OAS
Smp_148530	2479.96	-2.17896	0.367974	-5.92149	3.19031e-09	3.05744e-08	major egg antigen
Smp_093840	1148.21	1.53598	0.259694	5.91458	3.32731e-09	3.18541e-08	tetraspanning orphan receptor
Smp_065420	560.529	-1.24645	0.210777	-5.91358	3.34749e-09	3.20139e-08	hypothetical protein
Smp_193440	1509.35	-1.34182	0.226978	-5.91167	3.38647e-09	3.23529e-08	Cell division cycle and apoptosis regulator
Smp_078750	1736.15	1.53854	0.260416	5.90801	3.46263e-09	3.30462e-08	tetraspanin 97e
Smp_059210	1095.69	-1.01109	0.171155	-5.90746	3.4743e-09	3.31231e-08	hypothetical protein
Smp_158270	72.4442	-2.03554	0.34483	-5.90303	3.56883e-09	3.3989e-08	hypothetical protein
Smp_059790	4046.57	1.98588	0.336483	5.90188	3.59392e-09	3.41572e-08	transketolase
Smp_002950	78.4562	-3.4701	0.587952	-5.90202	3.59086e-09	3.41572e-08	13 kDa deflagellation inducible
Smp_124430	1015.16	1.38753	0.235592	5.88953	3.87293e-09	3.67708e-08	coatomer protein complex, subunit beta 1
Smp_180470	255.747	1.3071	0.222252	5.88118	4.07352e-09	3.85955e-08	Dynein intermediate chain
Smp_177120	119.111	-1.90655	0.324169	-5.88134	4.0697e-09	3.85955e-08	cell division cycle 7 protein
Smp_137970	311.391	-2.19462	0.373267	-5.8795	4.11518e-09	3.895e-08	PHD finger protein
Smp_151620	35.8067	4.56166	0.77592	5.87904	4.12664e-09	3.90182e-08	protocadherin 9
Smp_171830	394.138	-1.77766	0.302459	-5.87736	4.16849e-09	3.93733e-08	trna pseudouridine synthase 3
Smp_036220	908.361	2.25716	0.38442	5.8716	4.31599e-09	4.07247e-08	histone H2B
Smp_205290	13.13	4.96573	0.846302	5.86756	4.42252e-09	4.1687e-08	hypothetical protein
Smp_156370	76.0091	4.67336	0.796612	5.86655	4.44968e-09	4.19e-08	coiled coil domain containing protein 147
Smp_073590	1519.05	2.05473	0.350552	5.86141	4.5896e-09	4.31733e-08	GTP binding protein
Smp_168500	189.404	-1.71132	0.292308	-5.85453	4.78361e-09	4.49522e-08	hypoxanthine guanine phosphoribosyltransferase
Smp_164060	104.452	-2.02708	0.346383	-5.85213	4.85318e-09	4.55593e-08	hypothetical protein
Smp_163540	908.815	-1.58147	0.270447	-5.84762	4.98657e-09	4.67492e-08	hypothetical protein
Smp_100380	132.688	-2.55956	0.437719	-5.8475	4.99011e-09	4.67492e-08	dna replication complex gins protein psf2
Smp_163580	1136.15	1.38451	0.236802	5.8467	5.01422e-09	4.69272e-08	rab family
Smp_177580	453.283	2.98372	0.510436	5.84542	5.05277e-09	4.72398e-08	#N/A
Smp_167240	300.747	-1.39905	0.239612	-5.8388	5.25775e-09	4.91062e-08	Nicastrin
Smp_170570	1213.54	-1.39678	0.239325	-5.83634	5.33594e-09	4.97858e-08	pre mRNA processing factor 39
Smp_160530	326.383	-1.80978	0.310213	-5.83398	5.41219e-09	5.0446e-08	hypothetical protein
Smp_181870	18.9129	-6.03238	1.03436	-5.83199	5.47708e-09	5.0999e-08	dna replication licensing factor mcm8
Smp_179740	65.6945	-2.42033	0.415098	-5.83073	5.5185e-09	5.13327e-08	transmembrane protein 8A
Smp_053820	2862.23	2.21158	0.379567	5.82658	5.65754e-09	5.25728e-08	preprotein translocase secy subunit (sec61)
Smp_041280	284.637	3.7322	0.640582	5.82627	5.66803e-09	5.2617e-08	CUGBP Elav family
Smp_061140	70.1161	-4.19613	0.72024	-5.82602	5.67659e-09	5.26432e-08	mechanosensory protein 2
Smp_035470	2239.18	1.49612	0.257094	5.81935	5.90753e-09	5.47296e-08	dolichyl diphosphooligosaccharide protein
Smp_170440	221.122	-2.0648	0.355012	-5.81614	6.02233e-09	5.57369e-08	transmembrane protein 209
Smp_004350	664.779	1.34118	0.230872	5.8092	6.27703e-09	5.80357e-08	ubiquitin conjugating enzyme E2 L3
Smp_062020	94.0508	-2.70947	0.467562	-5.7949	6.8362e-09	6.3142e-08	sterile alpha motif domain containing protein
Smp_187030	20.4653	-4.6041	0.794874	-5.79223	6.9456e-09	6.4088e-08	hypothetical protein
Smp_174210	526.18	-1.20692	0.208477	-5.78922	7.07131e-09	6.51824e-08	ATP dependent RNA helicase DDX46
Smp_139080	229.316	-1.99093	0.343955	-5.78836	7.1078e-09	6.54531e-08	bestrophin
Smp_130740	35.4998	-4.59809	0.794986	-5.78386	7.30038e-09	6.71591e-08	chromosome transmission fidelity protein 8
Smp_161210	29.9188	5.24912	0.908469	5.77798	7.5603e-09	6.94806e-08	hypothetical protein
Smp_214210	12.7296	4.99058	0.863832	5.77726	7.59274e-09	6.97089e-08	rhoptry protein
Smp_136690	81.4603	3.63372	0.629076	5.77629	7.63666e-09	7.00421e-08	acetylcholinesterase
Smp_032180	2517.88	1.96253	0.340026	5.77171	7.84717e-09	7.19011e-08	ADP ribosylation factor
Smp_040080	648.175	1.08496	0.188108	5.76775	8.03364e-09	7.35363e-08	hypothetical protein
Smp_016390	471.352	1.09848	0.190576	5.76398	8.2151e-09	7.51224e-08	charged multivesicular body protein 2a
Smp_040510	276.203	-1.59144	0.276216	-5.76159	8.33255e-09	7.61205e-08	alpha 1,6 mannosylglycoprotein
Smp_124740	87.7176	4.11617	0.714618	5.75997	8.41312e-09	7.67802e-08	hypothetical protein
Smp_079310	1202.66	1.70353	0.295937	5.7564	8.59279e-09	7.8342e-08	transmembrane emp24 domain containing protein
Smp_136810	326.302	-1.64452	0.285702	-5.75607	8.60949e-09	7.84164e-08	proteolipid protein
Smp_187190	18.6108	-5.31533	0.923635	-5.7548	8.67453e-09	7.89305e-08	innexin unc 9
Smp_201840	66.7887	-2.92301	0.507955	-5.75446	8.69191e-09	7.90103e-08	hypothetical protein
Smp_155450	61.621	3.92651	0.684207	5.73878	9.53633e-09	8.66005e-08	SH3 and multiple ankyrin repeat domains protein
Smp_146950	37.5643	3.93527	0.686302	5.73403	9.80732e-09	8.89733e-08	basement membrane specific heparan sulfate
Smp_161930	1651.93	2.31123	0.403214	5.732	9.92521e-09	8.99539e-08	actin
Smp_008340	199.596	-1.66103	0.289802	-5.73162	9.94786e-09	9.00703e-08	5' nucleotidase domain containing 2
Smp_000980	1783.17	-1.75912	0.30702	-5.72967	1.00626e-08	9.10193e-08	high mobility group protein B1
Smp_100120	232.565	2.01438	0.351636	5.72859	1.01266e-08	9.15082e-08	er degradation enhancing alpha mannosidase
Smp_152500	11.0545	5.09977	0.892439	5.71442	1.10078e-08	9.93735e-08	cyclic nucleotide gated cation channel
Smp_186680	63.9061	2.2789	0.399043	5.71091	1.12372e-08	1.01345e-07	Rho GTPase activating protein 1
Smp_064510	839.96	-1.34835	0.236537	-5.70036	1.19557e-08	1.07718e-07	RNA binding protein NOB1
Smp_012380	44.6094	3.33484	0.585151	5.69911	1.20435e-08	1.08403e-07	voltage gated potassium channel subunit beta 2
Smp_124930	53.1824	4.03299	0.707727	5.69851	1.20856e-08	1.08676e-07	neuropilin (nrp) and tolloid (tll)
Smp_159550	123.554	1.58387	0.278612	5.68486	1.30923e-08	1.17613e-07	calpain 5
Smp_127190	790.503	3.1754	0.558717	5.68339	1.32053e-08	1.18512e-07	hypothetical protein
Smp_214180	32.84	4.52923	0.797121	5.68198	1.33147e-08	1.19362e-07	calpain
Smp_164690	267.438	-2.05797	0.362201	-5.68183	1.33261e-08	1.19362e-07	e3 ubiquitin protein ligase chfr
Smp_137070	1298.45	-1.87487	0.330242	-5.67726	1.36867e-08	1.22473e-07	NTF2 export protein 2
Smp_058500	19.7385	3.76256	0.662869	5.67617	1.37741e-08	1.23135e-07	hypothetical protein
Smp_072180	412.047	-1.17375	0.206818	-5.67528	1.38461e-08	1.23658e-07	apoptosis regulator BAX
Smp_133210	62.4572	2.9914	0.527419	5.67177	1.41327e-08	1.26096e-07	lysosomal alpha glucosidase
Smp_196370	22.2385	5.00243	0.882307	5.66972	1.43035e-08	1.27496e-07	potassium voltage gated channel subfamily H
Smp_200440	676.586	3.43965	0.606798	5.66852	1.44038e-08	1.28205e-07	hypothetical protein
Smp_167750	87.1998	2.39678	0.422829	5.66843	1.4411e-08	1.28205e-07	fatty acid amide hydrolase 1
Smp_150380	169.739	3.14574	0.55501	5.66791	1.44552e-08	1.28473e-07	sphingomyelin synthase 1
Smp_097620	632.638	2.19146	0.386722	5.66676	1.45524e-08	1.29213e-07	vacuolar protein sorting associated protein 25
Smp_168760	144.464	-1.79421	0.316737	-5.66468	1.47303e-08	1.30666e-07	pyridine nucleotide disulfide oxidoreductase
Smp_025740	568.771	1.59886	0.282319	5.66332	1.4847e-08	1.31573e-07	Rho GTP binding protein RhoU
Smp_140530	222.979	-2.75895	0.48733	-5.66136	1.50177e-08	1.32958e-07	replication factor c subunit 2
Smp_072870	743.662	1.23226	0.217711	5.66007	1.51311e-08	1.33833e-07	alpha centractin
Smp_095670	1726.59	-1.76563	0.312049	-5.65817	1.52992e-08	1.35189e-07	Zinc finger CCCH domain containing protein 3
Smp_160470	20.4728	4.96339	0.877515	5.65619	1.54774e-08	1.36632e-07	TBC1 domain family B
Smp_135600	101.211	3.67938	0.650964	5.65221	1.58402e-08	1.39701e-07	zinc finger protein
Smp_174670	365.771	1.68645	0.298422	5.65122	1.59315e-08	1.40371e-07	Ubiquitin conjugating enzyme E2 J1
Smp_156790	65.8802	3.09475	0.547683	5.65063	1.5986e-08	1.40716e-07	hypothetical protein
Smp_073280	350.309	2.91646	0.516405	5.64763	1.62678e-08	1.4306e-07	hypothetical protein
Smp_125730	147.994	3.22442	0.571562	5.64141	1.68666e-08	1.48184e-07	hypothetical protein
Smp_176760	262.215	-1.93833	0.343672	-5.64005	1.69999e-08	1.49212e-07	metaxin 1
Smp_098250	30.5638	2.82176	0.500515	5.63772	1.72315e-08	1.51101e-07	hypothetical protein
Smp_194790	26.7131	2.81106	0.499326	5.62971	1.80513e-08	1.58138e-07	hypothetical protein
Smp_133820	333.355	-1.5968	0.284253	-5.61754	1.93697e-08	1.69526e-07	peptidylprolyl isomerase domain and WD
Smp_175010	44.2334	3.9889	0.71057	5.61367	1.98084e-08	1.73201e-07	vesicular glutamate transporter
Smp_028190	456.098	1.29718	0.231439	5.60484	2.08443e-08	1.82085e-07	methylthioadenosine phosphorylase
Smp_155510	307.137	2.05943	0.367483	5.60415	2.09277e-08	1.8264e-07	transmembrane protein 66
Smp_075720	50.5458	-3.99031	0.712688	-5.59895	2.15654e-08	1.88026e-07	Sm23
Smp_167060	106.758	-3.00234	0.536538	-5.59577	2.1965e-08	1.91329e-07	tyrosine protein phosphatase non receptor type
Smp_147650	682.578	-1.03004	0.18413	-5.5941	2.21771e-08	1.92994e-07	methylenetetrahydrofolate dehydrogenase
Smp_124340	13.5039	-5.44251	0.973137	-5.59275	2.23503e-08	1.94316e-07	Nose resistant to fluoxetine protein 6
Smp_030440	150.235	2.7885	0.498802	5.5904	2.26542e-08	1.96772e-07	hypothetical protein
Smp_151560	73.8086	-5.03033	0.900024	-5.5891	2.28245e-08	1.98064e-07	dna replication licensing factor mcm9
Smp_072330	27250.5	-1.84227	0.3298	-5.58601	2.32344e-08	2.01431e-07	heat shock protein
Smp_174420	146.596	-1.96141	0.351194	-5.58499	2.33718e-08	2.0243e-07	hypothetical protein
Smp_054640	95.1555	-2.10034	0.376217	-5.5828	2.36673e-08	2.04797e-07	major facilitator superfamily domain containing protein
Smp_104760	33.2842	3.30501	0.592454	5.57851	2.42591e-08	2.09523e-07	hypothetical protein
Smp_176660	160.559	-1.72672	0.309526	-5.57861	2.42447e-08	2.09523e-07	hypothetical protein
Smp_213480	16.7296	-5.43034	0.973701	-5.57701	2.44684e-08	2.11132e-07	muts protein
Smp_205540	159.839	-2.13471	0.38279	-5.57672	2.45089e-08	2.11283e-07	hypothetical protein
Smp_173740	197.574	1.49496	0.268157	5.57494	2.47608e-08	2.13254e-07	hypothetical protein
Smp_046890	248.661	-1.62061	0.290797	-5.573	2.50393e-08	2.1545e-07	protein phosphatase ptc7
Smp_124840	567.346	-1.97773	0.355032	-5.57057	2.5391e-08	2.18272e-07	E3 ubiquitin protein ligase UBR7
Smp_168560	34.0543	3.3279	0.597804	5.56687	2.59353e-08	2.22742e-07	steroid dehydrogenase
Smp_134140	247.533	2.84184	0.510677	5.56486	2.62364e-08	2.25118e-07	cAMP specific 3',5' cyclic phosphodiesterase 4D
Smp_077880	56.1318	3.58701	0.645046	5.56087	2.68436e-08	2.30113e-07	annexin
Smp_179540	28.5882	-3.26878	0.587842	-5.56065	2.6877e-08	2.30185e-07	hypothetical protein
Smp_019130	220.778	-1.90539	0.343039	-5.55445	2.78494e-08	2.38068e-07	polyribonucleotide 5' hydroxyl kinase Clp1
Smp_176490	282.988	-2.45114	0.441282	-5.55458	2.78276e-08	2.38068e-07	hypothetical protein
Smp_016490	18.9673	3.57211	0.643452	5.55148	2.83256e-08	2.41914e-07	Saposin B domain containing protein
Smp_092930	241.767	-1.99017	0.358728	-5.54784	2.89218e-08	2.46776e-07	hypothetical protein
Smp_137720	31.6904	3.31305	0.597262	5.54707	2.905e-08	2.4764e-07	hypothetical protein
Smp_045010	26.1772	3.39809	0.612627	5.54675	2.91035e-08	2.47717e-07	tegument-allergen-like protein
Smp_028080	118.898	2.03502	0.366889	5.54669	2.9113e-08	2.47717e-07	serine palmitoyltransferase 1
Smp_201150	45.6602	-3.33985	0.602174	-5.54632	2.9175e-08	2.48015e-07	Equilibrative nucleoside transporter 1
Smp_164340	51.9732	3.52141	0.635234	5.54348	2.9651e-08	2.51828e-07	Afadin
Smp_157290	192.565	-2.02043	0.364559	-5.54213	2.98808e-08	2.53545e-07	Condensin complex subunit 2
Smp_166530	17.2375	4.39988	0.79458	5.53736	3.0706e-08	2.60307e-07	phospholipase A
Smp_127280	47.8206	3.53029	0.638319	5.53061	3.19126e-08	2.70103e-07	diacylglycerol O-acyltransferase 1
Smp_142910	243.446	1.654	0.299066	5.53056	3.19205e-08	2.70103e-07	coatomer subunit alpha
Smp_129310	260.339	-1.50526	0.272331	-5.52733	3.25134e-08	2.74867e-07	inositol polyphosphate multikinase
Smp_138210	170.647	2.83701	0.513454	5.52535	3.28837e-08	2.77742e-07	hypothetical protein
Smp_031730	771.278	2.08072	0.376629	5.52458	3.30279e-08	2.78703e-07	signal peptidase 18 kDa subunit
Smp_070710	396.26	-1.67405	0.303358	-5.5184	3.42092e-08	2.88406e-07	dimethylallyltransferase
Smp_070610	93.871	2.16123	0.391715	5.51735	3.44157e-08	2.89881e-07	mps one binder kinase activator 1
Smp_181010	47.4652	2.31136	0.419067	5.51549	3.47803e-08	2.92683e-07	integrin alpha ps
Smp_126550	107.193	2.62611	0.476347	5.51302	3.52738e-08	2.96565e-07	#N/A
Smp_056850	281.475	1.85329	0.336217	5.51217	3.54432e-08	2.97716e-07	hypothetical protein
Smp_018250	684.734	2.52957	0.459135	5.50943	3.59999e-08	3.02116e-07	troponin i
Smp_144590	208.17	2.70048	0.490505	5.50551	3.68105e-08	3.08636e-07	ras gtpase activating protein
Smp_201470	204.147	2.31494	0.420616	5.50369	3.71926e-08	3.11437e-07	hypothetical protein
Smp_163000	210.002	1.75627	0.319114	5.5036	3.72124e-08	3.11437e-07	hypothetical protein
Smp_103610	241.687	3.38956	0.616534	5.49777	3.84624e-08	3.21606e-07	cathepsin B-like cysteine proteinase
Smp_203620	82.5591	-2.2491	0.409183	-5.49656	3.87278e-08	3.2353e-07	hypothetical protein
Smp_028840	15.7788	4.45381	0.810393	5.49587	3.88789e-08	3.24497e-07	hypothetical protein
Smp_129260	610.283	-2.73351	0.497566	-5.49377	3.93446e-08	3.28086e-07	poly (ADP ribose) polymerase
Smp_159360	108.457	3.26264	0.594047	5.49222	3.96903e-08	3.30668e-07	growth arrest specific 2
Smp_133650	12.888	5.84558	1.0644	5.49191	3.97606e-08	3.30954e-07	hypothetical protein
Smp_177320	16.1098	-4.07087	0.74135	-5.49116	3.99299e-08	3.32062e-07	hypothetical protein
Smp_054320	138.696	-1.90078	0.346299	-5.48884	4.04583e-08	3.36151e-07	hypothetical protein
Smp_172610	34.8289	-4.90284	0.893569	-5.48681	4.09259e-08	3.39729e-07	hypothetical protein
Smp_212890	89.2622	2.1055	0.383943	5.48388	4.161e-08	3.45096e-07	metallophosphoesterase 1
Smp_070020	162.15	3.75211	0.685244	5.47558	4.3608e-08	3.6134e-07	rhoptry associated membrane antigen
Smp_149490	13.4066	-5.31362	0.970826	-5.4733	4.41725e-08	3.65688e-07	hypothetical protein
Smp_170650	12.4778	4.86603	0.889827	5.46851	4.53835e-08	3.75375e-07	hypothetical protein
Smp_147680	204.745	2.09221	0.382886	5.4643	4.64732e-08	3.84042e-07	DNA supercoiling factor
Smp_039130	470.446	3.07417	0.563472	5.45577	4.87614e-08	4.02588e-07	Niemann Pick C1 protein
Smp_068920	703.967	-2.20624	0.404477	-5.45455	4.90967e-08	4.04993e-07	centromere:microtubule binding protein cbf5
Smp_144600	78.4418	2.75097	0.50438	5.45417	4.9201e-08	4.05489e-07	guanine nucleotide exchange factor
Smp_164630	36.8973	4.57559	0.839032	5.45341	4.94123e-08	4.06865e-07	protein sickie
Smp_074560	26.4636	4.02463	0.738051	5.45306	4.95114e-08	4.07316e-07	hypothetical protein
Smp_024390	699.025	2.09797	0.384988	5.44945	5.0527e-08	4.15298e-07	microsomal signal peptidase 25 kDa subunit
Smp_197460	127.746	-1.73325	0.318298	-5.44536	5.16998e-08	4.24558e-07	myelin proteolipid
Smp_197400	10.0075	4.29621	0.789029	5.44493	5.18266e-08	4.25219e-07	hypothetical protein
Smp_211100	819.266	-2.05568	0.3776	-5.44408	5.20749e-08	4.26875e-07	inner nuclear membrane protein man1
Smp_006930	764.699	-1.37046	0.251963	-5.43913	5.35427e-08	4.38515e-07	beta 1 3 galactosyltransferase brn
Smp_135040	15.6171	5.222	0.960477	5.43688	5.42206e-08	4.43671e-07	gamma aminobutyric acid receptor subunit
Smp_143530	94.6361	2.79182	0.513884	5.43279	5.54789e-08	4.53563e-07	#N/A
Smp_175490	48.3511	-3.12334	0.574994	-5.43195	5.57418e-08	4.55307e-07	sister chromatid cohesion protein PDS5
Smp_156150	33.7742	3.63014	0.668337	5.4316	5.5852e-08	4.55418e-07	small conductance calcium activated potassium
Smp_049160	111.502	-3.18759	0.586862	-5.43159	5.58546e-08	4.55418e-07	zinc finger protein
Smp_176970	68.2322	-3.49978	0.644909	-5.42677	5.73816e-08	4.67454e-07	serine:threonine protein kinase Nek4
Smp_074830	67.2651	3.2141	0.592351	5.42601	5.76282e-08	4.69046e-07	tubulin polyglutamylase ttll6
Smp_192610	49.0592	3.75928	0.693179	5.42325	5.85263e-08	4.75935e-07	hypothetical protein
Smp_165900	541.669	-1.42808	0.263353	-5.42267	5.87158e-08	4.77053e-07	n2n2 dimethylguanosine tRNA methyltranserase
Smp_155700	377.305	1.05325	0.194293	5.42093	5.92903e-08	4.81295e-07	mannose P dolichol utilization defect 1 protein
Smp_171580	461.221	2.15088	0.396807	5.42048	5.94392e-08	4.82077e-07	aromatic amino acid decarboxylase
Smp_013970	31.004	-4.01099	0.740425	-5.41715	6.05567e-08	4.90707e-07	#N/A
Smp_159150	266.685	2.18816	0.40397	5.41664	6.07305e-08	4.91681e-07	hypothetical protein
Smp_136710	172.09	3.31991	0.613321	5.41301	6.19747e-08	5.01313e-07	calcium transporting atpase
Smp_105190	42.4536	-2.97692	0.550145	-5.41115	6.26213e-08	5.06097e-07	collagen alpha chain
Smp_172520	9.50717	5.2569	0.972096	5.4078	6.38034e-08	5.14744e-07	hypothetical protein
Smp_203930	33.1631	-3.23519	0.598241	-5.40784	6.37888e-08	5.14744e-07	hypothetical protein
Smp_134800	21.1103	5.05537	0.934922	5.40726	6.39953e-08	5.15839e-07	tyrosine protein kinase
Smp_210370	1371.23	1.57229	0.290821	5.40638	6.43097e-08	5.17919e-07	ormdl protein
Smp_194810	31.9531	4.25575	0.787625	5.40328	6.54345e-08	5.26515e-07	#N/A
Smp_085830	495.6	1.25251	0.231852	5.40221	6.58258e-08	5.29201e-07	hypothetical protein
Smp_067800	2604.29	2.18926	0.405278	5.40186	6.59539e-08	5.29766e-07	fibrillin 2
Smp_149150	493.125	1.25885	0.233118	5.40007	6.66159e-08	5.34616e-07	diazepam binding inhibitor
Smp_193400	12.1678	4.91217	0.91023	5.39662	6.79073e-08	5.44504e-07	hypothetical protein
Smp_213940	413.033	-1.65267	0.306282	-5.39592	6.81724e-08	5.46153e-07	gamma-tubulin complex, putative
Smp_210100	150.412	2.27151	0.421351	5.39101	7.00619e-08	5.60801e-07	mechanosensory protein 2
Smp_133230	53.9083	-3.16508	0.587231	-5.38983	7.05226e-08	5.63996e-07	membrane bound acyltransferase:hhat
Smp_136700	195.492	1.79217	0.332752	5.38589	7.20871e-08	5.76007e-07	hypothetical protein
Smp_018950	291.765	-1.58364	0.294325	-5.38058	7.42446e-08	5.9273e-07	lupus la ribonucleoprotein
Smp_155500	20.2751	-5.73516	1.06737	-5.37318	7.73596e-08	6.17062e-07	DNA polymerase theta
Smp_199150	43.3433	-4.19487	0.781488	-5.3678	7.97043e-08	6.35213e-07	rho guanine nucleotide exchange factor 3
Smp_005960	14.1657	5.82074	1.08466	5.36641	8.03193e-08	6.39559e-07	hypothetical protein
Smp_073400	2314.92	1.32493	0.247152	5.36078	8.28643e-08	6.59252e-07	lysosome associated membrane glycoprotein
Smp_197370	316.36	2.05495	0.383387	5.35999	8.32283e-08	6.61575e-07	hypothetical protein
Smp_195090	18.3665	4.46631	0.83355	5.35818	8.40631e-08	6.67276e-07	tegument-allergen-like protein
Smp_163210	511.1	2.70409	0.504671	5.35812	8.40908e-08	6.67276e-07	echinoderm microtubule associated protein
Smp_213690	482.445	2.05325	0.383227	5.3578	8.42411e-08	6.6789e-07	hypothetical protein
Smp_095810	187.839	-1.78606	0.333506	-5.35541	8.53613e-08	6.76188e-07	uracil phosphoribosyltransferase
Smp_128070	141.462	-1.4077	0.26288	-5.3549	8.5605e-08	6.77534e-07	hypothetical protein
Smp_072460	43.2676	-2.7378	0.511354	-5.35402	8.60227e-08	6.80254e-07	phosphomevalonate kinase
Smp_132850	585.141	2.10871	0.394109	5.35056	8.76804e-08	6.92766e-07	1 acylglycerophosphocholine O acyltransferase
Smp_196130	1531.91	1.92795	0.360439	5.34889	8.84934e-08	6.97988e-07	salivary selenoprotein
Smp_143750	207.837	1.71781	0.321149	5.34895	8.84652e-08	6.97988e-07	transmembrane protein 63A
Smp_213430	32.1799	4.21048	0.787504	5.34661	8.96165e-08	7.05634e-07	hypothetical protein
Smp_125810	386.607	1.56431	0.292571	5.34676	8.95444e-08	7.05634e-07	zinc finger protein 112
Smp_017360	2255.56	-1.43502	0.268447	-5.34564	9.00985e-08	7.08821e-07	T complex protein 1 subunit alpha
Smp_148490	48.8214	4.66686	0.873574	5.34226	9.1794e-08	7.21542e-07	kazrin
Smp_052890	321.622	1.6347	0.306058	5.34114	9.23615e-08	7.25381e-07	hypothetical protein
Smp_012570	695.692	-1.72041	0.322186	-5.3398	9.30488e-08	7.3003e-07	van gogh
Smp_139620	439.801	-3.32254	0.622237	-5.33968	9.31124e-08	7.3003e-07	hypothetical protein
Smp_055220	50.5526	3.61293	0.676646	5.33948	9.32149e-08	7.3021e-07	surface protein PspC
Smp_140650	90.5559	2.99006	0.560203	5.33745	9.42606e-08	7.37772e-07	hypothetical protein
Smp_129170	17.9174	5.30484	0.99412	5.33621	9.49074e-08	7.42202e-07	dual specificity
Smp_123550	19.5062	4.88505	0.917211	5.32599	1.00406e-07	7.84535e-07	Venom allergen-like protein 8
Smp_133790	291.122	2.39823	0.450344	5.32534	1.00767e-07	7.86682e-07	small g protein signaling modulator 3
Smp_059540	463.649	1.56267	0.293817	5.3185	1.04624e-07	8.161e-07	signal recognition particle 54 kda protein
Smp_011740	294.392	-2.04248	0.384346	-5.31418	1.07139e-07	8.35011e-07	B9 domain containing protein 1
Smp_092950	172.211	2.44836	0.46094	5.31167	1.08623e-07	8.4586e-07	protein osteopotentia
Smp_168140	45.9264	2.81364	0.529862	5.31014	1.09541e-07	8.52286e-07	hypothetical protein
Smp_152380	90.0242	4.152	0.782157	5.3084	1.10591e-07	8.59726e-07	hypothetical protein
Smp_150690	1042.34	-1.25013	0.235514	-5.30811	1.10766e-07	8.60354e-07	proliferation associated protein 2G4 38 kDa
Smp_141290	1630.1	1.24261	0.234144	5.30705	1.11416e-07	8.64675e-07	innexin
Smp_142550	139.679	-2.42837	0.458153	-5.30033	1.15592e-07	8.96322e-07	nuclear pore membrane
Smp_144360	417.219	-1.48654	0.28078	-5.29432	1.19458e-07	9.25526e-07	myelin proteolipid
Smp_128580	131.539	3.07409	0.580971	5.29129	1.21459e-07	9.40233e-07	pikachurin
Smp_152970	7.5903	4.79899	0.907054	5.29075	1.21818e-07	9.42216e-07	hypothetical protein
Smp_134620	9.80371	5.35382	1.01215	5.28953	1.22629e-07	9.47694e-07	monocarboxylate transporter
Smp_025380	28.1942	3.49327	0.660476	5.28903	1.2297e-07	9.49527e-07	16 kda calcium binding protein
Smp_124310	57.606	-2.07395	0.392538	-5.28343	1.26786e-07	9.7817e-07	5' AMP activated protein kinase subunit beta 2
Smp_079970	30.992	-4.38204	0.829503	-5.28273	1.27273e-07	9.81103e-07	Tubulin beta 2C chain
Smp_019190	486.362	-1.71349	0.324387	-5.28226	1.27602e-07	9.82812e-07	Pre mRNA splicing factor SLU7
Smp_201600	2296.4	2.398	0.454047	5.28138	1.28216e-07	9.86715e-07	hypothetical protein
Smp_087250	264.085	2.07945	0.394228	5.27474	1.32943e-07	1.02223e-06	muscle LIM protein
Smp_171710	337.296	-3.02476	0.573462	-5.27456	1.33076e-07	1.0224e-06	structural maintenance of chromosomes protein 2
Smp_199100	133.926	-1.83033	0.347098	-5.27323	1.34043e-07	1.02897e-06	TFIIH basal transcription factor complex
Smp_134180	111.368	2.95319	0.560201	5.27166	1.35194e-07	1.03694e-06	receptor type tyrosine protein phosphatase
Smp_031860	465.172	1.05558	0.200456	5.26587	1.39524e-07	1.06926e-06	coatomer subunit delta
Smp_012010	199.53	1.93314	0.367216	5.26432	1.40706e-07	1.07741e-06	forkhead box subgroup O
Smp_140200	393.472	1.64534	0.312734	5.26114	1.43166e-07	1.09534e-06	flowering locus c variant
Smp_021220	850.319	1.38907	0.26409	5.25982	1.44193e-07	1.10228e-06	hypothetical protein
Smp_117810	116.892	1.85066	0.351964	5.25811	1.45546e-07	1.11169e-06	v type proton atpase subunit h
Smp_137150	13.4284	5.75039	1.09422	5.25523	1.47839e-07	1.12827e-06	beta mannosidase
Smp_131190	44.4219	2.69153	0.512429	5.2525	1.50048e-07	1.14418e-06	Diacylglycerol kinase zeta
Smp_158280	152.409	-1.80245	0.343262	-5.25095	1.51318e-07	1.1529e-06	zinc finger protein
Smp_069760	404.007	-1.19934	0.228696	-5.24426	1.56907e-07	1.19449e-06	armadillo repeat containing protein
Smp_063560	398.739	-1.57922	0.301173	-5.24357	1.57503e-07	1.19804e-06	transmembrane protein 120b
Smp_162800	17.592	3.82294	0.729476	5.24067	1.59996e-07	1.21599e-06	protein kinase
Smp_058480	23.7566	4.4256	0.845446	5.23463	1.65318e-07	1.25541e-06	high affinity cAMP specific 3' 5' cyclic
Smp_076050	189.89	-2.19159	0.418795	-5.23308	1.66705e-07	1.26489e-06	hypothetical protein
Smp_072990	339.078	-2.08775	0.399063	-5.23162	1.6803e-07	1.27389e-06	Transmembrane protein 185B
Smp_175270	43.7091	4.26455	0.815378	5.23015	1.69369e-07	1.28298e-06	hypothetical protein
Smp_173110	16.8171	5.30897	1.01517	5.22963	1.69853e-07	1.28559e-06	hypothetical protein
Smp_158430	211.501	1.57261	0.300896	5.22642	1.72825e-07	1.30701e-06	hepatotoxic ribonuclease omega 1
Smp_101890	98.1544	-2.59994	0.497775	-5.22313	1.75928e-07	1.32938e-06	hypothetical protein
Smp_199720	39.7312	-2.80849	0.537926	-5.22096	1.77996e-07	1.3439e-06	MAGUK p55 subfamily
Smp_187170	14.563	4.55001	0.872296	5.21613	1.82697e-07	1.37826e-06	hypothetical protein
Smp_162440	141.42	3.97622	0.762491	5.21478	1.84038e-07	1.38723e-06	mechanosensory protein 2
Smp_161340	15.4438	4.61308	0.884821	5.21357	1.85242e-07	1.39517e-06	Sm29
Smp_055800	827.18	-1.3234	0.253933	-5.21161	1.87208e-07	1.40882e-06	pescadillo
Smp_130440	422.024	2.03401	0.390632	5.20697	1.91946e-07	1.44245e-06	protein MICAL 3
Smp_165400	192.649	-2.76118	0.53029	-5.20693	1.91991e-07	1.44245e-06	propionyl coenzyme A carboxylase alpha chain
Smp_203630	194.551	-1.80564	0.347185	-5.2008	1.98434e-07	1.48963e-06	hypothetical protein
Smp_075430	21.89	4.85133	0.932966	5.19989	1.99403e-07	1.49446e-06	hypothetical protein
Smp_039340	54.499	2.93353	0.564137	5.20003	1.99252e-07	1.49446e-06	hypothetical protein
Smp_137240	132.267	-1.53478	0.295239	-5.19844	2.00973e-07	1.505e-06	phosphatidylserine receptor
Smp_024000	283.176	1.29754	0.2498	5.1943	2.05497e-07	1.53762e-06	vacuolar protein sorting associated protein 33B
Smp_136730	27.0636	3.40716	0.656598	5.18911	2.11302e-07	1.57977e-06	cathepsin d (lysosomal aspartyl protease)
Smp_123165	587.332	1.98688	0.382993	5.18777	2.12827e-07	1.58988e-06	Dynactin subunit 4
Smp_070640	524.112	2.87005	0.553491	5.18536	2.15596e-07	1.60926e-06	unc 112 protein
Smp_017620	12.1634	4.71062	0.908625	5.18434	2.16781e-07	1.61678e-06	#N/A
Smp_163810	39.7072	4.29723	0.829508	5.18046	2.21341e-07	1.64812e-06	laminin gamma 1 chain
Smp_166580	275.024	-1.39317	0.268927	-5.18047	2.21322e-07	1.64812e-06	NADPH:adrenodoxin oxidoreductase, mitochondrial
Smp_141720	811.429	1.411	0.272396	5.17995	2.21948e-07	1.6513e-06	3-keto-dihydrosphingosine reductase
Smp_142770	487.38	-1.16918	0.226236	-5.16795	2.36674e-07	1.75944e-06	transportin 1
Smp_160100	89.6707	1.40803	0.272463	5.1678	2.36866e-07	1.75944e-06	hypothetical protein
Smp_159640	12.7296	4.71308	0.912401	5.16558	2.39699e-07	1.77904e-06	synaptotagmin
Smp_194760	1544.29	1.38182	0.26764	5.16297	2.43065e-07	1.80257e-06	hypothetical protein
Smp_044520	251.233	1.31387	0.254498	5.16261	2.43531e-07	1.80456e-06	hypothetical protein
Smp_134060	338.738	-1.1102	0.215074	-5.16196	2.44382e-07	1.80941e-06	WD repeat and SOF domain containing protein 1
Smp_145890	81.9497	3.62208	0.702027	5.15947	2.47656e-07	1.83217e-06	adamTS protein 3
Smp_212780	70.83	2.8194	0.546561	5.15844	2.49011e-07	1.84072e-06	Tubulin polymerization-promoting protein (TPPP), putative
Smp_144450	13.4005	5.6305	1.09233	5.15459	2.5419e-07	1.87749e-06	apobec 1 complementation factor
Smp_078690	485.842	2.212	0.429509	5.15007	2.60387e-07	1.92171e-06	calponin
Smp_026320	170.668	2.54093	0.493659	5.14714	2.64495e-07	1.95046e-06	hypothetical protein
Smp_170550	2020.59	1.0643	0.206881	5.14453	2.68186e-07	1.97609e-06	granulin
Smp_179590	122.201	2.06707	0.401903	5.1432	2.70098e-07	1.98859e-06	dual 3',5' cyclic AMP and GMP phosphodiesterase
Smp_162040	975.376	1.12102	0.218068	5.14069	2.73735e-07	2.01375e-06	Transmembrane 9 superfamily protein
Smp_025030	149.742	3.54999	0.690844	5.13863	2.76742e-07	2.03424e-06	dual specificity protein kinase
Smp_005720	785.38	2.80267	0.545453	5.13824	2.7732e-07	2.03686e-06	Aquaporin 3 (AQP 3)
Smp_132330	154.007	1.30604	0.254213	5.13756	2.78327e-07	2.04262e-06	ras protein rab 35
Smp_170040	14.8974	4.92031	0.957856	5.13679	2.7947e-07	2.04937e-06	hypothetical protein
Smp_130580	199.724	2.89379	0.563774	5.13289	2.85325e-07	2.09064e-06	disabled 2
Smp_150970	334.796	2.47635	0.482794	5.12922	2.9095e-07	2.13015e-06	RAB6 interacting protein 2 (ERC protein 1)
Smp_148440	257.634	-1.71458	0.334368	-5.12782	2.93118e-07	2.14431e-06	PCI domain containing protein 2
Smp_174960	454.73	-1.81579	0.354119	-5.12763	2.9341e-07	2.14475e-06	merlin:moesin:ezrin:radixin
Smp_149480	344.533	1.03967	0.202857	5.1251	2.97373e-07	2.17198e-06	hypothetical protein
Smp_042210	79.4305	-2.93944	0.573951	-5.12141	3.03253e-07	2.21317e-06	origin recognition complex subunit 4
Smp_132080	160.46	1.62105	0.31664	5.11953	3.06302e-07	2.23365e-06	Sugar transporter
Smp_145460	188.62	2.15589	0.421549	5.1142	3.15066e-07	2.29573e-06	hypothetical protein
Smp_143760	177.419	-1.67995	0.328555	-5.11314	3.16844e-07	2.30686e-06	DNA repair protein REV1
Smp_203030	9.90386	4.37758	0.85648	5.11113	3.20233e-07	2.32968e-06	hypothetical protein
Smp_047870	409.111	1.24268	0.243175	5.11022	3.21785e-07	2.33912e-06	LIM domain kinase 1
Smp_051400	17.3392	4.57012	0.894636	5.10835	3.24979e-07	2.3586e-06	dynein light chain
Smp_137780	47.7056	-2.56034	0.501197	-5.10846	3.2479e-07	2.3586e-06	sister chromatid cohesion protein PDS5
Smp_158630	568.5	-1.43702	0.281391	-5.10683	3.27606e-07	2.37579e-06	cement protein 3B variant 1
Smp_119140	80.2927	-2.02591	0.397196	-5.10053	3.38712e-07	2.45439e-06	hypothetical protein
Smp_007660	446.085	-0.966707	0.189603	-5.09858	3.42216e-07	2.47783e-06	transcription elongation factor A protein 1
Smp_213710	128.224	-1.6777	0.329267	-5.09526	3.48267e-07	2.51965e-06	hypothetical protein
Smp_126290	107.032	2.83619	0.557001	5.09189	3.54507e-07	2.56278e-06	hypothetical protein
Smp_130670	54.1852	-3.64059	0.715033	-5.0915	3.55249e-07	2.56612e-06	hypothetical protein
Smp_132510	35.6089	-3.50463	0.688371	-5.0912	3.55812e-07	2.56817e-06	breast cancer type 1 susceptibility protein
Smp_130640	225.83	-1.22044	0.239859	-5.08816	3.61553e-07	2.60654e-06	calpain 7 protein
Smp_130220	234.324	-1.76735	0.347351	-5.08809	3.61696e-07	2.60654e-06	hypothetical protein
Smp_011640	168.346	-2.21398	0.435407	-5.08486	3.67906e-07	2.64921e-06	hypothetical protein
Smp_170470	60.7264	-2.30198	0.452739	-5.08455	3.68489e-07	2.65133e-06	family M13 unassigned peptidase (M13 family)
Smp_158230	52.0083	2.69507	0.530145	5.08365	3.70252e-07	2.66193e-06	EF hand calcium binding domain containing protein
Smp_135970	9.17753	4.70272	0.925845	5.07938	3.78671e-07	2.72033e-06	calcium binding protein cml
Smp_156480	64.6564	3.32605	0.65489	5.0788	3.79836e-07	2.72656e-06	hypothetical protein
Smp_207010	498.456	1.19672	0.235796	5.07522	3.87043e-07	2.77613e-06	signal recognition particle 72 kDa subunit
Smp_125200	22.2241	4.88329	0.963099	5.07039	3.96996e-07	2.8453e-06	Aquaporin 9 (AQP 9) (Small solute channel 1)
Smp_143620	68.3519	-2.97339	0.586464	-5.07002	3.97764e-07	2.84857e-06	muscle specific protein h
Smp_041480	952.601	-1.04948	0.207012	-5.06967	3.98515e-07	2.85173e-06	rna recognition motif (rrm) domain containing protein
Smp_124280	72.0375	-3.88067	0.765768	-5.06768	4.02687e-07	2.87934e-06	hypothetical protein
Smp_123050	37.0204	4.42741	0.874459	5.06303	4.1265e-07	2.94828e-06	Regulator of G protein signaling 20
Smp_203560	74.538	2.44467	0.483251	5.05879	4.21921e-07	3.01218e-06	hypothetical protein
Smp_179660	198.536	3.19576	0.631777	5.05837	4.22862e-07	3.01655e-06	hypothetical protein
Smp_130880	37.5086	3.29272	0.651252	5.05598	4.28181e-07	3.05212e-06	histone H2A
Smp_038140	180.254	2.78772	0.551474	5.05504	4.30295e-07	3.06481e-06	GRIP and coiled coil domain containing protein
Smp_214140	546.824	1.4075	0.278661	5.05094	4.39643e-07	3.12897e-06	hypothetical protein
Smp_057860	42.128	3.11263	0.616481	5.04904	4.44046e-07	3.15785e-06	hypothetical protein
Smp_027300	276.092	-1.34584	0.26669	-5.04645	4.50088e-07	3.19834e-06	histone lysine N methyltransferase SUV39H2
Smp_138680	869.286	-1.16827	0.231718	-5.04178	4.61223e-07	3.27493e-06	DNAj subfamily C member
Smp_188070	108.148	1.8272	0.362989	5.03376	4.80958e-07	3.41242e-06	ubiquitin carboxyl terminal hydrolase of the
Smp_033600	387.596	-1.19964	0.238432	-5.03135	4.87033e-07	3.45286e-06	Dicer 2
Smp_019940	708.35	1.59195	0.316472	5.0303	4.89721e-07	3.46924e-06	hypothetical protein
Smp_174840	155.814	-1.80501	0.358947	-5.02863	4.93998e-07	3.49414e-06	chromobox protein
Smp_029240	1807.95	-1.84897	0.367688	-5.02864	4.93963e-07	3.49414e-06	protein arginine N methyltransferase 1
Smp_187230	18.3638	3.44215	0.684704	5.02721	4.9766e-07	3.51734e-06	#N/A
Smp_147240	128.191	2.86061	0.569116	5.02641	4.99758e-07	3.52944e-06	mitogen activated protein kinase binding protein
Smp_030300	3257.77	1.01013	0.200971	5.02625	5.00165e-07	3.5296e-06	endoplasmin
Smp_001040	1715.28	2.61704	0.520906	5.02402	5.06001e-07	3.56804e-06	kinesin heavy chain
Smp_124760	27.515	3.99033	0.794897	5.01993	5.16894e-07	3.64008e-06	hypothetical protein
Smp_097280	72.9182	1.84968	0.36847	5.01989	5.1701e-07	3.64008e-06	hypothetical protein
Smp_137170	239.023	2.75083	0.548116	5.0187	5.2022e-07	3.65987e-06	plasma membrane calcium transporting ATPase
Smp_084950	13.6874	-4.03459	0.804655	-5.01407	5.32915e-07	3.74632e-06	protein regulator of cytokinesis 1
Smp_159340	132.374	-1.74468	0.347975	-5.01381	5.33634e-07	3.7485e-06	Dynein intermediate chain
Smp_059800	318.654	-1.48969	0.297342	-5.01004	5.44192e-07	3.81683e-06	prenyl transferase
Smp_024660	181.841	-2.80858	0.560589	-5.01006	5.44142e-07	3.81683e-06	cell adhesion molecule
Smp_159630	75.8221	-3.62735	0.724205	-5.00873	5.47905e-07	3.83994e-06	hypothetical protein
Smp_000340	12.3595	5.04743	1.00846	5.0051	5.5833e-07	3.91001e-06	ecdysone-induced protein E78
Smp_135490	23.4677	4.06365	0.812222	5.00313	5.64065e-07	3.94717e-06	multidrug and toxin extrusion protein 1
Smp_169070	58.436	-2.55796	0.511727	-4.99869	5.77211e-07	4.03608e-06	protein sfi1
Smp_001780	32.6874	2.99683	0.599773	4.9966	5.83495e-07	4.07691e-06	hypothetical protein
Smp_004820	470.494	2.00921	0.40258	4.99083	6.01203e-07	4.19745e-06	Microsomal signal peptidase 12 kDa
Smp_093230	978.509	1.95013	0.390823	4.98981	6.04401e-07	4.21657e-06	actin protein 10
Smp_023270	301.592	-1.16517	0.233856	-4.98243	6.27896e-07	4.37716e-06	RNA binding protein 40
Smp_143390	242.882	-1.57648	0.316642	-4.97874	6.39996e-07	4.45812e-06	cytohesin 1
Smp_143860	22.3009	3.00331	0.603324	4.97794	6.4264e-07	4.47314e-06	hypothetical protein
Smp_038440	63.1514	3.76386	0.756323	4.97652	6.47377e-07	4.4993e-06	heart specific myosin light chain phosphatase
Smp_096840	145.199	1.86264	0.374285	4.97653	6.47329e-07	4.4993e-06	#N/A
Smp_132280	33.3981	3.97096	0.798019	4.97602	6.49065e-07	4.50762e-06	complement component C8 beta
Smp_184420	14.6703	-5.26666	1.05876	-4.97437	6.54585e-07	4.54251e-06	hypothetical protein
Smp_018980	47.6493	4.6024	0.925293	4.97399	6.55892e-07	4.54471e-06	hypothetical protein
Smp_006730	128.745	2.22716	0.447757	4.97404	6.55701e-07	4.54471e-06	DNA damage regulated autophagy modulator protein
Smp_202610	17.3456	2.92842	0.589006	4.97181	6.63312e-07	4.59266e-06	hypothetical protein
Smp_140180	287.724	1.84	0.370214	4.97009	6.69212e-07	4.63002e-06	transmembrane emp24 domain containing protein 7
Smp_049250	2673.97	-1.90285	0.382961	-4.96879	6.73711e-07	4.65764e-06	major egg antigen
Smp_128380	276.8	2.39354	0.482037	4.96547	6.85357e-07	4.73459e-06	glutamate synthase
Smp_210850	127.307	1.09308	0.220172	4.96466	6.88202e-07	4.75066e-06	transcription factor 25
Smp_198560	15.4841	3.73096	0.752004	4.96136	7e-07	4.82298e-06	neutral sphingomyelinase
Smp_071600	709.939	1.59692	0.321885	4.96115	7.0078e-07	4.82298e-06	translocon associated protein, alpha
Smp_123680	286.413	1.58148	0.318768	4.96122	7.00529e-07	4.82298e-06	hypothetical protein
Smp_045940	815.983	-0.896932	0.180789	-4.96122	7.00524e-07	4.82298e-06	RNA polymerase II associated factor 1
Smp_118780	233.997	-1.43184	0.288914	-4.95595	7.19787e-07	4.95009e-06	2 aminoethanethiol dioxygenase
Smp_092150	361.17	2.67286	0.539695	4.95253	7.32532e-07	5.03396e-06	hypothetical protein
Smp_135610	104.455	-2.25715	0.455774	-4.95235	7.33229e-07	5.03498e-06	protocadherin fat 1
Smp_137030	21.3289	3.67797	0.743171	4.94902	7.45875e-07	5.118e-06	SET domain protein
Smp_169700	65.1408	2.8457	0.575069	4.94845	7.48078e-07	5.12928e-06	lim domain and actin binding 1
Smp_213900	78.09	2.53737	0.513394	4.94235	7.71876e-07	5.28483e-06	type IV collagen alpha 1 chain
Smp_059980	154.506	2.44178	0.494053	4.94234	7.71915e-07	5.28483e-06	arginase
Smp_180760	28.2487	3.86561	0.782429	4.94053	7.79091e-07	5.32998e-06	neurexin
Smp_092320	358.015	2.42649	0.491236	4.93957	7.82955e-07	5.35242e-06	RNA polymerase II elongation factor ELL
Smp_213700	46.918	2.42715	0.491647	4.93677	7.94277e-07	5.42237e-06	methyltransferase, putative
Smp_100090	2027.45	-1.66079	0.336414	-4.93675	7.94367e-07	5.42237e-06	high mobility group protein B1
Smp_075450	141.229	-1.54879	0.313915	-4.9338	8.06454e-07	5.50078e-06	heparan sulfate 2 O sulfotransferase HS2ST1
Smp_152530	53.6323	-2.29579	0.465601	-4.93081	8.18913e-07	5.58162e-06	hypothetical protein
Smp_141010	243.232	2.05306	0.41671	4.92683	8.35753e-07	5.69217e-06	dysferlin1
Smp_073490	73.652	-1.84568	0.375252	-4.9185	8.72092e-07	5.93179e-06	dual specificity mitogen activated protein
Smp_048080	47.3843	-2.75597	0.56033	-4.91847	8.72227e-07	5.93179e-06	large subunit gtpase 1
Smp_168920	221.804	-1.42106	0.288996	-4.91723	8.7776e-07	5.965e-06	WD repeat domain 36
Smp_123540	15.108	5.03911	1.02485	4.91693	8.79111e-07	5.96976e-06	venom allergen-like (VAL) protein 12
Smp_187140	12.8981	4.44373	0.903878	4.91629	8.82e-07	5.98495e-06	cathepsin L proteinase
Smp_033620	266.484	1.67028	0.33999	4.91275	8.98089e-07	6.08963e-06	hypothetical protein
Smp_204760	30.7545	4.31463	0.878305	4.91245	8.99449e-07	6.09435e-06	Asparagine rich protein (Ag319) (ARP)
Smp_043970	283.932	-1.16469	0.237337	-4.90735	9.23172e-07	6.25047e-06	hypothetical protein
Smp_064870	483.594	-0.967922	0.197332	-4.90504	9.34081e-07	6.31968e-06	Dynein intermediate chain
Smp_199210	389.421	1.99178	0.406109	4.90454	9.36459e-07	6.3311e-06	plasma membrane calcium transporting ATPase
Smp_176010	45.3638	-3.93154	0.801667	-4.90421	9.38045e-07	6.33715e-06	cytoskeleton associated protein 5
Smp_073140	673.032	1.45859	0.297454	4.90357	9.41084e-07	6.35301e-06	hypothetical protein
Smp_047330	174.206	2.04989	0.418077	4.90313	9.432e-07	6.36261e-06	hypothetical protein
Smp_102190	10.6035	4.65732	0.950219	4.90132	9.51956e-07	6.41697e-06	steroid dehydrogenase
Smp_115340	107.814	-1.79136	0.36583	-4.8967	9.74604e-07	6.56481e-06	n alpha acetyltransferase 40, NatD catalytic
Smp_149070	197.121	-1.77459	0.362659	-4.89326	9.91813e-07	6.67583e-06	Nucleolar protein 6
Smp_015530	2501.03	-1.7079	0.349212	-4.89073	1.00462e-06	6.75709e-06	hypothetical protein
Smp_056060	49.1109	3.32963	0.681377	4.88662	1.02581e-06	6.89453e-06	rhodopsin orphan GPCR
Smp_062890	855.404	1.85658	0.380005	4.88567	1.03078e-06	6.92286e-06	V type proton ATPase 16 kDa proteolipid
Smp_092500	101.567	2.06251	0.422259	4.88447	1.03709e-06	6.96019e-06	thioredoxin domain containing protein 17
Smp_012540	482.926	-1.38096	0.282753	-4.88396	1.03976e-06	6.97297e-06	rRNA processing protein UTP23
Smp_000140	164.709	-1.09486	0.224197	-4.88348	1.04229e-06	6.98484e-06	hypothetical protein
Smp_132940	725.424	0.948772	0.194296	4.88313	1.04412e-06	6.99205e-06	PRKCA binding protein
Smp_091470	637.702	-1.16822	0.239299	-4.88184	1.05103e-06	7.03316e-06	puromycin sensitive aminopeptidase
Smp_123830	116.805	2.85918	0.58573	4.8814	1.05338e-06	7.04375e-06	collagen alpha (xi) chain
Smp_047460	102.471	3.2153	0.659254	4.87718	1.07613e-06	7.19065e-06	astacin protein
Smp_164440	662.174	-1.16318	0.238817	-4.8706	1.11258e-06	7.42879e-06	hypothetical protein
Smp_134550	2916.8	2.07506	0.426105	4.86983	1.11692e-06	7.45235e-06	hypothetical protein
Smp_198450	144.235	-1.25303	0.257364	-4.86872	1.12321e-06	7.48888e-06	ATPase family AAA domain containing protein 1
Smp_048540	204.721	1.91391	0.393481	4.86404	1.15012e-06	7.66272e-06	dolichol kinase
Smp_128710	60.1255	3.64451	0.749441	4.86297	1.15638e-06	7.69883e-06	g protein coupled receptor
Smp_175930	54.0391	4.82792	0.992993	4.86198	1.16215e-06	7.73168e-06	ELAVprotein 2:3:4
Smp_151790	80.2464	-2.62415	0.540312	-4.85673	1.19339e-06	7.93378e-06	hypothetical protein
Smp_146340	305.939	-1.59381	0.328367	-4.85373	1.2116e-06	8.049e-06	ATP dependent RNA helicase DDX27
Smp_151510	77.7862	-3.96445	0.816865	-4.85325	1.21456e-06	8.06282e-06	crossover junction endonuclease mus81
Smp_211130	98.9567	-2.05242	0.423364	-4.8479	1.24775e-06	8.27719e-06	hypothetical protein
Smp_152740	102.392	-2.43002	0.501347	-4.84699	1.2535e-06	8.30929e-06	Cirhin
Smp_166170	27.4101	2.91028	0.600632	4.84537	1.26378e-06	8.37142e-06	hypothetical protein
Smp_124210	12.8786	4.72205	0.975139	4.84243	1.28258e-06	8.48367e-06	ephrin type A receptor 4 A
Smp_042980	265.573	-0.963437	0.198954	-4.84251	1.28211e-06	8.48367e-06	mevalonate kinase
Smp_010800	122.792	-2.45116	0.506311	-4.8412	1.29054e-06	8.53021e-06	prip interacting protein, pimt
Smp_210520	518.389	-1.77709	0.3671	-4.84087	1.29272e-06	8.53849e-06	transcription factor Dp 1
Smp_031190	49.936	3.38103	0.698555	4.84004	1.29816e-06	8.56823e-06	phospholipase A
Smp_033350	532.454	1.35206	0.279458	4.83815	1.31052e-06	8.64358e-06	peptide N(4) (N acetyl beta
Smp_130950	1687.74	-1.48666	0.307295	-4.83789	1.31222e-06	8.64858e-06	DNA double strand break repair rad50 ATPase
Smp_007190	114.778	2.12463	0.439429	4.83497	1.33168e-06	8.77053e-06	lariat debranching enzyme
Smp_123060	286.636	2.34872	0.485902	4.83373	1.33998e-06	8.8189e-06	protein transport protein sec16a
Smp_153840	213.348	1.85915	0.38484	4.83098	1.35862e-06	8.93518e-06	neurobeachin
Smp_144810	65.7909	-2.80935	0.581792	-4.82879	1.37368e-06	9.02777e-06	tyrosine protein phosphatase non receptor type
Smp_019350	361.66	2.82442	0.585363	4.82506	1.39958e-06	9.19137e-06	hypothetical protein
Smp_068720	165.994	-2.09547	0.434362	-4.82424	1.4054e-06	9.22298e-06	Formin Homology 2 Domain containing protein
Smp_141480	165.119	2.96541	0.614803	4.82335	1.41168e-06	9.25758e-06	hypothetical protein
Smp_034400	477.219	1.42016	0.294469	4.82279	1.41563e-06	9.27502e-06	adaptor protein complex
Smp_002810	149.123	-2.63128	0.545604	-4.82269	1.41636e-06	9.27502e-06	fidgetin protein 1
Smp_183860	15.5768	-4.27037	0.885569	-4.82218	1.41999e-06	9.2922e-06	KRAB A domain containing protein
Smp_021260	16.0615	4.66571	0.967886	4.82051	1.43189e-06	9.36236e-06	protein phosphatase 1 regulatory subunit
Smp_146070	44.4177	2.21593	0.459698	4.82039	1.43275e-06	9.36236e-06	hypothetical protein
Smp_036370	642.363	-1.12401	0.233252	-4.81887	1.44377e-06	9.42762e-06	mpv17 protein 2
Smp_166070	376.118	-1.48912	0.309095	-4.81769	1.45227e-06	9.47639e-06	ras specific guanine nucleotide releasing factor
Smp_023940	215.777	2.43948	0.506438	4.81694	1.45778e-06	9.50562e-06	golgin subfamily a member
Smp_138650	11.4801	-3.89801	0.809565	-4.81495	1.47236e-06	9.59384e-06	hypothetical protein
Smp_041550	163.99	2.06858	0.429746	4.81349	1.48316e-06	9.65738e-06	hypothetical protein
Smp_143800	19.7174	4.05965	0.843777	4.81128	1.49964e-06	9.75773e-06	sodium:chloride dependent neurotransmitter
Smp_171300	2071.12	1.55727	0.32372	4.81056	1.50507e-06	9.78617e-06	ATPase, H+ transporting, lysosomal accessory
Smp_173120	203.697	1.15785	0.240742	4.80951	1.51302e-06	9.8309e-06	presqualene diphosphate phosphatase
Smp_148700	89.08	-1.5734	0.327182	-4.80894	1.51736e-06	9.8521e-06	leukocyte receptor cluster
Smp_143580	60.7832	-2.02156	0.420388	-4.80878	1.51851e-06	9.85258e-06	MORN repeat containing protein 5
Smp_134430	80.9019	2.8167	0.586236	4.80472	1.54966e-06	1.00476e-05	#N/A
Smp_158380	355.507	-1.10562	0.230149	-4.80392	1.55593e-06	1.00811e-05	mitochondrial import inner membrane translocase
Smp_085180	12.048	3.19655	0.666343	4.79715	1.6094e-06	1.04202e-05	cathepsin B (C01 family)
Smp_033710	1189.95	-1.57851	0.329589	-4.78934	1.67334e-06	1.08266e-05	ATP dependent RNA helicase DDX3X
Smp_141980	63.2217	3.08574	0.644482	4.78793	1.68509e-06	1.0895e-05	cAMP specific 3',5' cyclic phosphodiesterase 4D
Smp_051500	64.0757	2.12945	0.444786	4.78759	1.68798e-06	1.0906e-05	nucleolar protein c7c
Smp_010940	8129.67	-1.54934	0.323782	-4.78513	1.70879e-06	1.10326e-05	acidic leucine-rich nuclear phosphoprotein 32-related protein
Smp_142040	60.1448	-3.96586	0.828959	-4.78415	1.71714e-06	1.10787e-05	Myb DNA binding domain containing protein
Smp_090520	483.413	1.85395	0.387565	4.78358	1.72202e-06	1.11024e-05	purine nucleoside phosphorylase
Smp_088920	46.1741	3.92907	0.821513	4.78273	1.72934e-06	1.11418e-05	serine:threonine protein kinase
Smp_176150	320.376	-1.1055	0.231153	-4.78254	1.73091e-06	1.11441e-05	DNA cross link repair 1A protein
Smp_214200	361.685	1.8267	0.382037	4.78148	1.74013e-06	1.1185e-05	rhoptry protein
Smp_033130	66.4184	1.75327	0.366686	4.78138	1.74093e-06	1.1185e-05	hypothetical protein
Smp_181490	108.309	-3.08426	0.645028	-4.78159	1.73916e-06	1.1185e-05	death associated protein kinase 1
Smp_198930	17.5251	4.56949	0.956017	4.77972	1.75542e-06	1.1268e-05	hypothetical protein
Smp_161920	5569.8	1.96459	0.411035	4.77962	1.75629e-06	1.1268e-05	actin
Smp_153540	100.733	-1.66454	0.348332	-4.7786	1.76518e-06	1.13171e-05	EF hand calcium binding domain containing protein
Smp_087270	572.095	-0.984301	0.20607	-4.77653	1.78344e-06	1.14262e-05	pre mRNA splicing factor ATP dependent
Smp_055130	233.006	1.19297	0.249764	4.77639	1.78469e-06	1.14263e-05	pleckstrin y domain containing family F
Smp_900090	5242.26	1.4825	0.310414	4.77588	1.7892e-06	1.14471e-05	NADH dehydrogenase subunit 4
Smp_090150	649.744	-1.22882	0.257373	-4.77448	1.80175e-06	1.15194e-05	camp regulated phosphoprotein
Smp_057020	222.294	-1.61643	0.338678	-4.77278	1.81704e-06	1.16091e-05	ATP dependent RNA helicase DDX31
Smp_150920	92.9156	2.68831	0.563433	4.7713	1.83041e-06	1.16864e-05	synaptotagmin
Smp_060620	83.4698	-1.6552	0.347313	-4.76572	1.88177e-06	1.2006e-05	5' nucleotidase
Smp_078610	1067.5	-0.959091	0.201257	-4.76551	1.88381e-06	1.20106e-05	rna binding motif protein 25
Smp_126850	575.597	-1.15924	0.243298	-4.76471	1.89128e-06	1.20499e-05	RNA binding protein 5
Smp_079050	58.2341	-3.67323	0.77121	-4.76295	1.90781e-06	1.21467e-05	DNA primase large subunit
Smp_170620	111.711	-2.99894	0.629744	-4.76216	1.91534e-06	1.21863e-05	rhodopsin orphan GPCR
Smp_210050	53.3722	-1.83902	0.386212	-4.76168	1.91988e-06	1.22067e-05	subfamily M23B non peptidase ue
Smp_179010	282.67	-1.70534	0.358178	-4.76116	1.92485e-06	1.22298e-05	exosome complex component RRP42
Smp_158360	19.3538	-3.51061	0.737373	-4.76097	1.92661e-06	1.22325e-05	hypothetical protein
Smp_156080	75.9479	2.50644	0.526527	4.76033	1.93281e-06	1.22634e-05	dynein heavy chain
Smp_212990	171.171	-2.16785	0.455456	-4.75974	1.93838e-06	1.22902e-05	snRNA activating protein complex subunit 1
Smp_027550	1025.75	-0.830788	0.174559	-4.75935	1.94214e-06	1.23056e-05	RNA binding protein 15B
Smp_170110	234.632	1.89047	0.397577	4.75498	1.98469e-06	1.25665e-05	high density lipoprotein binding protein
Smp_146420	78.2414	-2.61374	0.549707	-4.7548	1.98647e-06	1.25691e-05	Spindle assembly checkpoint component MAD1
Smp_171850	132.991	-2.4851	0.522672	-4.7546	1.98842e-06	1.25728e-05	yippee protein
Smp_168930	78.0498	2.50249	0.526715	4.75112	2.02296e-06	1.27824e-05	golgi autoantigen, golgin subfamily a, 5
Smp_000780	48.0229	3.11253	0.655743	4.74656	2.06901e-06	1.30644e-05	#N/A
Smp_140270	75.3218	-1.99218	0.419984	-4.74346	2.10098e-06	1.32571e-05	carbonyl reductase 1
Smp_033110	477.759	-1.52288	0.321118	-4.74242	2.11182e-06	1.33164e-05	zinc finger protein 3
Smp_163330	160.791	-1.58546	0.334396	-4.74127	2.12385e-06	1.3383e-05	hypothetical protein
Smp_205560	18.2735	2.93004	0.618312	4.73877	2.15018e-06	1.35396e-05	hypothetical protein
Smp_001020	29.5563	-2.74654	0.579704	-4.73783	2.16015e-06	1.35931e-05	A:G specific adenine DNA glycosylase
Smp_147380	24.9395	4.04651	0.854221	4.73707	2.16827e-06	1.36289e-05	#N/A
Smp_010690	83.7558	2.67213	0.564111	4.73688	2.17029e-06	1.36289e-05	actin related protein 2:3 complex, subunit 2
Smp_136180	248.942	2.39441	0.505477	4.73693	2.16975e-06	1.36289e-05	dna polymerase eta
Smp_167610	38.5422	-2.51667	0.531326	-4.73658	2.17356e-06	1.36401e-05	multidrug resistance associated protein 4
Smp_138850	14.1477	4.03721	0.85241	4.73623	2.17735e-06	1.36546e-05	SH2 domain containing protein 4A
Smp_130940	437.061	1.97856	0.417767	4.73602	2.17952e-06	1.36589e-05	bet1
Smp_163300	958.07	-1.10327	0.233016	-4.73477	2.19308e-06	1.37344e-05	scavenger mRNA decapping enzyme DcpS
Smp_023530	1437.25	-1.08159	0.228534	-4.73275	2.21499e-06	1.38622e-05	nucleosome assembly protein 1 1 like
Smp_138630	38.5759	3.01827	0.637844	4.73199	2.22334e-06	1.39049e-05	hypothetical protein
Smp_039640	979.679	-1.3505	0.285414	-4.73173	2.22611e-06	1.39128e-05	Retinoblastoma binding protein 6
Smp_078270	534.785	-1.63318	0.345184	-4.73133	2.23052e-06	1.39309e-05	mps one binder kinase activator 2 like
Smp_136370	122.259	3.04512	0.643748	4.73029	2.24196e-06	1.39928e-05	hypothetical protein
Smp_166110	287.996	1.38691	0.293269	4.72912	2.25491e-06	1.40641e-05	staphylococcal nuclease domain containing protein
Smp_128860	15.0503	4.41539	0.934006	4.72737	2.27445e-06	1.41763e-05	lysyl oxidase 2
Smp_035210	131.459	3.32635	0.703793	4.72632	2.28623e-06	1.42401e-05	multivalent antigen sj97 GAPDH
Smp_202690	421.158	1.10224	0.233222	4.72614	2.28823e-06	1.42429e-05	universal stress protein
Smp_125280	36.8943	3.20628	0.678445	4.72593	2.29063e-06	1.42481e-05	F box only protein 16
Smp_160480	11.6418	3.95395	0.836973	4.72411	2.31127e-06	1.43668e-05	hypothetical protein
Smp_139970	17.5158	3.66503	0.776133	4.72217	2.33339e-06	1.44945e-05	Calmodulin 4 (Calcium binding protein Dd112)
Smp_178700	414.047	-1.37508	0.291558	-4.71633	2.4014e-06	1.49068e-05	histone acetyltransferase type B catalytic
Smp_144160	23.5335	-4.04009	0.856861	-4.71499	2.41727e-06	1.49953e-05	hypothetical protein
Smp_198290	362.479	0.827216	0.175459	4.71458	2.42205e-06	1.50147e-05	paramyosin
Smp_073610	499.507	-1.15449	0.245035	-4.71153	2.45869e-06	1.52316e-05	transcriptional co activator crsp77
Smp_199560	59.6721	-2.30939	0.490425	-4.70896	2.48986e-06	1.54143e-05	homeodomain transcription factor (phtf)
Smp_202380	16.6601	-4.15519	0.883368	-4.70381	2.55355e-06	1.57979e-05	#N/A
Smp_084830	253.273	2.28591	0.486036	4.70317	2.56157e-06	1.5819e-05	UDP glucose 6 dehydrogenase
Smp_104270	71.6711	2.01365	0.428153	4.70312	2.56212e-06	1.5819e-05	ectonucleotide pyrophosphatase:phosphodiesterase
Smp_070770	161	1.73636	0.369175	4.70334	2.55937e-06	1.5819e-05	Ufm1 conjugating enzyme 1
Smp_159930	108.601	-2.36902	0.503826	-4.70207	2.57536e-06	1.58901e-05	ADP ribosylation factor 3
Smp_002840	260.939	0.951542	0.202508	4.69879	2.61703e-06	1.61363e-05	hypothetical protein
Smp_055740	9.43603	-4.87502	1.03756	-4.69855	2.62015e-06	1.61447e-05	nanos protein
Smp_083480	163.193	-1.52068	0.323893	-4.69502	2.66578e-06	1.64148e-05	hypothetical protein
Smp_094950	436.899	-1.61879	0.344948	-4.69283	2.69448e-06	1.65802e-05	transmembrane and TPR repeat containing protein
Smp_197230	170.592	-2.03355	0.433344	-4.6927	2.69624e-06	1.65802e-05	adenylate kinase 8
Smp_210630	802.095	-1.9299	0.411386	-4.6912	2.71606e-06	1.66909e-05	histone H2A
Smp_061590	838.816	-1.40999	0.300628	-4.69015	2.73001e-06	1.67654e-05	regulator of nonsense transcripts 1
Smp_085530	885.397	1.95633	0.417388	4.68709	2.77123e-06	1.70071e-05	synapse associated protein
Smp_100080	104.8	1.90328	0.406261	4.68487	2.80134e-06	1.71804e-05	Tetraspanin,IPR000301 CD9:CD37:CD63
Smp_163530	12.8806	3.98968	0.853182	4.67624	2.92179e-06	1.79072e-05	#N/A
Smp_163550	32.2313	4.10229	0.877501	4.67497	2.94002e-06	1.80004e-05	hypothetical protein
Smp_058680	451.045	-1.57675	0.337279	-4.6749	2.94091e-06	1.80004e-05	ribosome biogenesis regulatory protein
Smp_075360	14.8152	4.95869	1.06137	4.67198	2.9831e-06	1.82464e-05	hypothetical protein
Smp_068070	589.457	-1.14338	0.2449	-4.66877	3.03001e-06	1.8521e-05	hypothetical protein
Smp_150830	24.8984	-3.65897	0.783822	-4.66812	3.03973e-06	1.8568e-05	EF hand calcium binding domain containing protein
Smp_089000	1332.39	1.78075	0.381513	4.66759	3.04752e-06	1.86032e-05	translocon associated protein subunit delta
Smp_093310	399.038	-1.23977	0.265649	-4.66695	3.05698e-06	1.86486e-05	transcription factor E2F5
Smp_130110	101.263	-2.45671	0.526554	-4.66564	3.07659e-06	1.87557e-05	ceramide kinase
Smp_212250	24.9775	-2.89032	0.619654	-4.66442	3.09491e-06	1.88549e-05	sepiapterin reductase
Smp_194310	17.7245	-4.23241	0.907867	-4.66192	3.13269e-06	1.90725e-05	Dab2 interacting protein 2
Smp_158550	22.9289	3.77641	0.810383	4.66002	3.16173e-06	1.92365e-05	semaphorin 5A
Smp_056560	31.5299	3.54463	0.761203	4.65662	3.21441e-06	1.9544e-05	cyclic nucleotide gated cation channel
Smp_152050	12.5259	3.92071	0.842138	4.65566	3.22942e-06	1.96223e-05	tetraspanin similiar to uroplakin 1
Smp_158780	90.721	1.40684	0.302268	4.65427	3.25134e-06	1.97424e-05	#N/A
Smp_202260	821.248	2.57695	0.554089	4.65079	3.3067e-06	2.00653e-05	hypothetical protein
Smp_179700	8.27906	4.39838	0.946206	4.64844	3.34457e-06	2.02817e-05	hypothetical protein
Smp_149880	13.5191	4.68921	1.00893	4.64772	3.35622e-06	2.03389e-05	major facilitator superfamily domain containing protein
Smp_105040	211.552	1.54069	0.331574	4.64661	3.37437e-06	2.04354e-05	CCR4 carbon catabolite repression 4
Smp_089220	256.868	1.66414	0.358173	4.64618	3.38146e-06	2.04649e-05	regulator of microtubule dynamics protein
Smp_153110	11.4489	3.92117	0.844146	4.64513	3.39855e-06	2.05526e-05	beta 1,4 galactosyltransferase 3
Smp_068270	741.143	-1.15992	0.249713	-4.64502	3.40043e-06	2.05526e-05	heat shock transcription factor
Smp_030020	147.989	-1.28334	0.276332	-4.64419	3.41409e-06	2.06215e-05	hypothetical protein
Smp_166960	33.4849	4.15188	0.89416	4.64333	3.42844e-06	2.06946e-05	ubiquitin protein ligase BRE1
Smp_210730	539.655	1.93436	0.416973	4.63906	3.49991e-06	2.11122e-05	prolyl oligopeptidase (S09 family)
Smp_194420	21.3776	4.16693	0.898397	4.63818	3.51492e-06	2.11887e-05	hypothetical protein
Smp_045780	57.5512	2.3801	0.513395	4.636	3.55224e-06	2.13997e-05	ubiquitin modifier activating enzyme 5
Smp_181040	56.3692	-3.21508	0.69392	-4.63322	3.60024e-06	2.16746e-05	KIF1 binding protein
Smp_156270	860.046	1.69989	0.367027	4.63151	3.63009e-06	2.184e-05	post gpi attachment to protein factor
Smp_172040	58.7254	3.28236	0.709227	4.62808	3.69069e-06	2.219e-05	protein unc 13 B
Smp_035360	124.143	-1.34092	0.289803	-4.62702	3.7097e-06	2.22897e-05	nucleolar protein 14
Smp_043150	2302.13	1.5548	0.336075	4.62635	3.72159e-06	2.23466e-05	calnexin
Smp_141940	72.3364	2.90509	0.628012	4.62584	3.73079e-06	2.23872e-05	hypothetical protein
Smp_137990	268.303	1.86035	0.402453	4.62253	3.79082e-06	2.27326e-05	complexin
Smp_083450	314.851	-1.52096	0.329068	-4.62202	3.80021e-06	2.2774e-05	dnaj subfamily c
Smp_123880	53.8907	3.14057	0.679508	4.62182	3.80386e-06	2.2781e-05	hypothetical protein
Smp_156500	67.6937	3.14043	0.679602	4.62098	3.81924e-06	2.28582e-05	rap guanine nucleotide exchange factor 1
Smp_042400	590.494	1.83735	0.397705	4.61988	3.83958e-06	2.29649e-05	arginine rich, mutated in early stage tumors
Smp_075770	96.5237	3.24042	0.701508	4.61922	3.85186e-06	2.30234e-05	hypothetical protein
Smp_180040	426.57	-1.1296	0.244566	-4.61881	3.8595e-06	2.3054e-05	fructose 2,6 bisphosphatase TIGAR
Smp_181340	720.559	-1.13557	0.246001	-4.61613	3.90965e-06	2.33384e-05	ATP:GTP binding protein 5
Smp_181070	26.8659	3.23158	0.700102	4.61588	3.91433e-06	2.33512e-05	hypothetical protein
Smp_013300	1220.13	1.83585	0.39803	4.61234	3.98165e-06	2.37374e-05	protein YIPF6
Smp_144750	108.577	-2.88182	0.625374	-4.60816	4.06247e-06	2.42035e-05	hypothetical protein
Smp_121600	136.992	2.52778	0.548652	4.60726	4.08018e-06	2.42932e-05	hypothetical protein
Smp_130530	89.0783	-1.53598	0.334016	-4.59851	4.25531e-06	2.53195e-05	hypothetical protein
Smp_126760	46.1445	1.76905	0.385046	4.59438	4.34029e-06	2.58084e-05	Proteasome activator complex subunit 4
Smp_211110	377.888	-1.10326	0.240201	-4.59308	4.3676e-06	2.5954e-05	cleavage and polyadenylation
Smp_140110	55.6198	3.02758	0.65924	4.59253	4.37898e-06	2.60048e-05	primary ciliary dyskinesia protein 1
Smp_121790	280.352	1.55377	0.338347	4.59223	4.38542e-06	2.60262e-05	39S ribosomal protein L13, mitochondrial
Smp_194590	424.373	1.43882	0.313393	4.59112	4.40877e-06	2.61479e-05	vacuolar protein sorting associated protein 52
Smp_143380	143.007	-2.28382	0.497485	-4.59073	4.41703e-06	2.618e-05	mismatch repair endonuclease PMS2
Smp_101820	263.732	-1.63978	0.357333	-4.58893	4.45528e-06	2.63896e-05	lupus la ribonucleoprotein
Smp_039160	73.1609	2.72018	0.592936	4.58765	4.48258e-06	2.65342e-05	hypothetical protein
Smp_148290	19.827	3.35688	0.732144	4.58501	4.53972e-06	2.68552e-05	hypothetical protein
Smp_138620	74.9473	3.25979	0.711453	4.58188	4.60808e-06	2.72285e-05	microtubule actin cross linking factor 1
Smp_049680	595.991	-0.979536	0.213786	-4.58185	4.60877e-06	2.72285e-05	Corepressor interacting with RBPJ 1
Smp_157830	19.999	3.6442	0.795977	4.57827	4.68826e-06	2.76803e-05	homeobox protein extradenticle
Smp_039620	9.23702	4.83384	1.05623	4.57651	4.72803e-06	2.78972e-05	lysosome associated membrane glycoprotein
Smp_082670	212.73	-1.20216	0.262809	-4.57426	4.77904e-06	2.81801e-05	AAA family ATPase
Smp_140140	24.1169	4.03846	0.882958	4.57378	4.78995e-06	2.82262e-05	tetraspanin CD63 receptor
Smp_133440	234.551	1.9306	0.422251	4.57217	4.82697e-06	2.84262e-05	hypothetical protein
Smp_167430	10.9703	4.25344	0.930665	4.57032	4.86978e-06	2.86599e-05	hypothetical protein
Smp_017610	26.9574	3.53469	0.77378	4.56808	4.9222e-06	2.89499e-05	amiloride sensitive amine oxidase
Smp_179000	375.116	-1.11653	0.244637	-4.56404	5.01778e-06	2.94931e-05	PHD and RING finger domain containing protein 1
Smp_157000	168.817	1.84055	0.403466	4.56185	5.07045e-06	2.97836e-05	GTPase ObgE
Smp_140950	394.588	-1.05108	0.230565	-4.5587	5.14702e-06	3.0214e-05	mortality factor 4 protein 1 like
Smp_068530	479.342	1.61318	0.354056	4.55628	5.20671e-06	3.05449e-05	syntenin 1
Smp_196840	176.198	2.08161	0.456977	4.55518	5.23412e-06	3.06861e-05	collagen alpha 1(II) chain
Smp_136320	662.147	-1.49566	0.328489	-4.55314	5.28522e-06	3.09659e-05	GSK3 beta interaction protein
Smp_024110	834.235	1.49895	0.329325	4.55157	5.32478e-06	3.11778e-05	enolase
Smp_162370	56.6408	-3.09147	0.679253	-4.55128	5.33214e-06	3.1201e-05	histone H1 gamma, late
Smp_156260	148.607	1.90219	0.419005	4.53978	5.63132e-06	3.29307e-05	#N/A
Smp_099850	274.331	1.45602	0.32083	4.53828	5.67159e-06	3.3145e-05	divalent metal transporter DMT1B
Smp_176870	9.96606	3.37777	0.744584	4.53646	5.72071e-06	3.34108e-05	cd63 antigen
Smp_141710	24.1204	-4.13228	0.911784	-4.53208	5.84056e-06	3.40891e-05	kinetochore associated protein 1
Smp_046120	294.22	3.39015	0.748097	4.5317	5.85097e-06	3.41282e-05	vesicular acetylcholine transporter
Smp_020220	730.016	1.65463	0.365408	4.52818	5.94952e-06	3.4681e-05	coatomer subunit zeta 1
Smp_071630	1288.45	0.942686	0.208225	4.52725	5.97551e-06	3.48104e-05	rab-2,4,14, putative
Smp_013050	296.001	-0.923157	0.20401	-4.52507	6.03765e-06	3.51501e-05	hypothetical protein
Smp_170430	24.7925	2.71102	0.599305	4.52361	6.07949e-06	3.53712e-05	D aspartate oxidase
Smp_194740	82.413	3.83119	0.847137	4.52252	6.11089e-06	3.55314e-05	G protein coupled receptor fragment
Smp_157020	38.8603	3.14579	0.695654	4.52206	6.12405e-06	3.55629e-05	titin
Smp_032310	619.435	1.65377	0.365704	4.52217	6.12097e-06	3.55629e-05	arp2:3 complex 21 kda subunit
Smp_132270	24.4189	3.90678	0.864307	4.52013	6.18008e-06	3.58655e-05	poly(rC) binding protein 3
Smp_131900	22.0879	2.86038	0.633029	4.51857	6.22594e-06	3.61064e-05	#N/A
Smp_051000	367.245	1.94249	0.429902	4.51845	6.22944e-06	3.61064e-05	coiled coil domain containing protein 132
Smp_163160	155.586	3.23986	0.717269	4.51693	6.27415e-06	3.63426e-05	short transient receptor potential channel 6
Smp_171620	401.264	1.22723	0.271782	4.51549	6.31715e-06	3.65686e-05	methylthioadenosine phosphorylase
Smp_169250	117.005	1.35197	0.299424	4.51525	6.32424e-06	3.65865e-05	tumor protein p63 regulated gene 1 protein
Smp_176370	511.663	1.21423	0.268981	4.51417	6.35645e-06	3.67498e-05	TBC1 domain family 3
Smp_148560	400.098	-1.30366	0.288846	-4.51335	6.38103e-06	3.68686e-05	MMP37 protein, mitochondrial like
Smp_126600	128.854	1.78508	0.395642	4.51186	6.42603e-06	3.71053e-05	hypothetical protein
Smp_161600	30.3897	4.28789	0.95045	4.51143	6.4391e-06	3.7134e-05	sox transcription factor
Smp_169220	330.577	2.89341	0.641336	4.51154	6.436e-06	3.7134e-05	hypothetical protein
Smp_137090	89.947	-3.49307	0.774328	-4.51109	6.44953e-06	3.71708e-05	BRCA1 associated RING domain protein 1
Smp_168950	190.5	2.05087	0.454657	4.51082	6.45779e-06	3.71951e-05	microtubule associated serine:threonine kinase
Smp_212940	337.111	-1.37062	0.304139	-4.50656	6.58883e-06	3.7926e-05	sideroflexin 1
Smp_130250	12.7049	3.64143	0.808433	4.50431	6.65887e-06	3.82812e-05	dual specificity
Smp_125790	264.654	-1.51761	0.336917	-4.5044	6.65593e-06	3.82812e-05	Actin protein 5
Smp_155480	234.082	-1.07342	0.238724	-4.49649	6.90847e-06	3.96913e-05	tetratricopeptide repeat protein 4
Smp_064950	995.751	1.26805	0.282203	4.49342	7.00888e-06	4.0243e-05	calcineurin b
Smp_160570	132.883	-1.45754	0.324385	-4.49325	7.0143e-06	4.02489e-05	hypothetical protein
Smp_078920	119.63	-3.48101	0.775068	-4.49124	7.08108e-06	4.06067e-05	condensin complex subunit 3
Smp_202920	10.5107	3.87608	0.863078	4.49099	7.0893e-06	4.06285e-05	hypothetical protein
Smp_043610	695.055	-1.2583	0.280193	-4.49082	7.09482e-06	4.06348e-05	hypothetical protein
Smp_146640	92.4755	3.45118	0.768747	4.48935	7.14409e-06	4.0866e-05	like glycosyltransferase
Smp_156280	146.814	-2.76006	0.614789	-4.48944	7.14104e-06	4.0866e-05	hypothetical protein
Smp_008450	14.8624	-4.4641	0.99471	-4.48784	7.19488e-06	4.11309e-05	leucine rich repeat and death domain containing protein
Smp_176960	245.538	-1.34974	0.300796	-4.48724	7.21511e-06	4.12209e-05	hypothetical protein
Smp_172460	50.4775	2.05378	0.457848	4.48572	7.26694e-06	4.14911e-05	Krueppel factor 10 like
Smp_136420	6.76634	5.45082	1.21611	4.48216	7.38914e-06	4.21627e-05	hypothetical protein
Smp_049730	739.536	-0.855852	0.190974	-4.4815	7.41193e-06	4.22664e-05	metastasis associated protein 1 (mta1)
Smp_142920	274.765	1.96207	0.437899	4.48065	7.44146e-06	4.24085e-05	coatomer protein complex subunit alpha
Smp_159940	119.832	-1.29714	0.289618	-4.47879	7.50661e-06	4.27532e-05	hypothetical protein
Smp_000160	105.053	3.8316	0.85571	4.47768	7.54581e-06	4.29232e-05	matrix remodeling associated protein 5
Smp_015050	427.535	1.37916	0.308007	4.47768	7.54571e-06	4.29232e-05	choline/ethanolamine kinase
Smp_151250	149.62	1.86977	0.417736	4.47595	7.6074e-06	4.32468e-05	ER lumen protein retaining receptor
Smp_155540	7.52341	4.8128	1.07552	4.47485	7.64636e-06	4.34414e-05	glycosyltransferase
Smp_144950	111.807	-2.4108	0.538866	-4.47384	7.68277e-06	4.36212e-05	centrosomal protein of 41 kDa
Smp_155840	15.089	-3.63887	0.813538	-4.47289	7.7168e-06	4.37874e-05	cellular myosin heavy chain
Smp_017290	336.358	1.4799	0.330894	4.47242	7.73395e-06	4.38576e-05	hypothetical protein
Smp_129390	57.179	2.64995	0.592736	4.47072	7.79573e-06	4.41806e-05	vacuolar protein sorting associated protein 13B
Smp_210270	21.8589	2.51076	0.561631	4.47047	7.80465e-06	4.42039e-05	DEAD box ATP dependent RNA helicase
Smp_072950	1064.58	1.68512	0.376964	4.47024	7.81334e-06	4.42258e-05	Transmembrane emp24 domain containing protein 4
Smp_006590	140.528	-1.39771	0.312871	-4.46737	7.91866e-06	4.47943e-05	zinc finger HIT domain containing protein 2
Smp_087580	606.331	1.69283	0.378974	4.46687	7.93726e-06	4.48719e-05	programmed cell death 6 interacting protein
Smp_026670	97.4761	3.39248	0.759501	4.46671	7.94301e-06	4.48768e-05	transmembrane protein 26
Smp_144020	37.8714	4.3435	0.972837	4.46478	8.0152e-06	4.5229e-05	glutamine rich protein 2
Smp_139350	47.9288	3.25884	0.729881	4.46489	8.01104e-06	4.5229e-05	hypothetical protein
Smp_136440	10.3436	4.63892	1.03931	4.46347	8.06431e-06	4.54781e-05	voltage gated potassium channel
Smp_153260	5.29379	4.96085	1.11148	4.46327	8.07194e-06	4.54933e-05	hypothetical protein
Smp_134040	21.5219	3.90207	0.874327	4.46294	8.08422e-06	4.55345e-05	Ecdysone induced protein 74EF B
Smp_162880	458.073	-1.3542	0.303555	-4.46112	8.15334e-06	4.58957e-05	neutral sphingomyelinase
Smp_006810	1631.06	1.28656	0.28868	4.4567	8.3231e-06	4.68225e-05	lim domain only 4
Smp_155920	217.395	1.88131	0.422254	4.45541	8.37323e-06	4.70757e-05	high density lipoprotein receptor (hdl)
Smp_082660	527.326	-1.49339	0.33546	-4.45175	8.51719e-06	4.78557e-05	E3 ubiquitin protein ligase TRIM33
Smp_174410	215.392	-1.47076	0.330401	-4.45143	8.52986e-06	4.78977e-05	hypothetical protein
Smp_135730	27.5453	3.83399	0.861464	4.45056	8.56481e-06	4.80645e-05	protocadherin alpha 7
Smp_073050	43.8584	-1.99329	0.447922	-4.45008	8.58388e-06	4.81421e-05	hypothetical protein
Smp_141700	36.1624	-2.50504	0.56303	-4.4492	8.61894e-06	4.83092e-05	#N/A
Smp_169930	14.1092	-3.9828	0.895218	-4.44897	8.62823e-06	4.83318e-05	HORMA domain containing protein 1
Smp_176050	22.9468	3.51572	0.79085	4.44549	8.76919e-06	4.90915e-05	ras protein RABH1b
Smp_169140	256.192	-2.13193	0.479785	-4.44352	8.84992e-06	4.95132e-05	chromatin assembly factor 1 subunit A A
Smp_023990	231.79	-1.22424	0.27563	-4.44161	8.9288e-06	4.99241e-05	YY1 transcription factor
Smp_151600	62.7314	3.45206	0.777516	4.43985	9.00212e-06	5.03034e-05	neuronal calcium sensor 2
Smp_044950	419.85	-1.18305	0.266487	-4.43942	9.02035e-06	5.03746e-05	fibroblast growth factor receptor substrate 3
Smp_162520	226.139	2.90079	0.65368	4.43763	9.09559e-06	5.07639e-05	protocadherin fat 4
Smp_201730	11.2144	3.23031	0.727971	4.43742	9.10426e-06	5.07814e-05	hypothetical protein
Smp_075290	427.129	-0.887235	0.199984	-4.43653	9.142e-06	5.09609e-05	hypothetical protein
Smp_005880	793.511	1.62484	0.366304	4.43576	9.17467e-06	5.1112e-05	phosphoenolpyruvate carboxykinase
Smp_138610	84.3569	-2.18136	0.49181	-4.43537	9.19152e-06	5.11748e-05	tumor protein p53 binding protein 1
Smp_006970	84.2058	1.35852	0.306379	4.4341	9.24562e-06	5.14449e-05	Rho GTPase activating protein 1
Smp_150910	47.0786	-1.77316	0.400156	-4.43117	9.37222e-06	5.21177e-05	hypothetical protein
Smp_168450	79.7303	2.18972	0.49443	4.42877	9.47714e-06	5.26693e-05	glycoprotein N acetylgalactosamine
Smp_137330	773.214	-1.67821	0.37952	-4.42192	9.7829e-06	5.43357e-05	serine dehydratase
Smp_149710	5.95793	5.06067	1.14526	4.4188	9.92513e-06	5.50923e-05	hypothetical protein
Smp_153490	543.393	1.63226	0.369448	4.4181	9.95711e-06	5.52364e-05	GDP mannose 4,6 dehydratase
Smp_024820	956.163	-1.31491	0.298163	-4.41004	1.03351e-05	5.72988e-05	tetraspanin family protein 16 invertebrate
Smp_100070	204.875	0.900556	0.204262	4.40882	1.03934e-05	5.75873e-05	RWD domain containing protein 2B
Smp_049930	298.164	-1.15997	0.263527	-4.40173	1.07391e-05	5.94666e-05	protein FAM73B
Smp_121660	629.523	1.99396	0.453088	4.40083	1.07836e-05	5.96771e-05	IDL peptide
Smp_175420	997.627	1.64888	0.374858	4.39866	1.08919e-05	6.02402e-05	microsomal signal peptidase 22 kDa
Smp_076300	39.1162	3.93422	0.894539	4.39805	1.09229e-05	6.03754e-05	forkhead box protein F1
Smp_095360	4000.55	1.71194	0.389313	4.39735	1.09579e-05	6.05324e-05	14 kDa fatty acid-binding protein
Smp_000260	2509.44	1.44377	0.32834	4.39719	1.09664e-05	6.05425e-05	proactivator polypeptide
Smp_200560	41.3084	-2.39403	0.544524	-4.39656	1.0998e-05	6.06808e-05	hypothetical protein
Smp_000350	30.7067	3.70374	0.842471	4.39628	1.1012e-05	6.07216e-05	hypothetical protein
Smp_094250	256.018	-2.54325	0.578886	-4.39335	1.11616e-05	6.15096e-05	3 phosphoinositide dependent protein kinase 1
Smp_123770	262.515	-1.12042	0.25511	-4.39191	1.12358e-05	6.18812e-05	protein SAAL1
Smp_179570	12.1117	4.08895	0.931098	4.39153	1.12556e-05	6.19528e-05	otopetrin
Smp_131990	354.623	1.63683	0.372911	4.38933	1.13699e-05	6.25445e-05	Growth arrest specific protein 2 3
Smp_093540	636.988	-1.43955	0.32836	-4.38407	1.16485e-05	6.40388e-05	activin receptor type 1
Smp_201660	21.3097	-3.47183	0.792027	-4.38347	1.16805e-05	6.41762e-05	hypothetical protein
Smp_127920	112.932	2.39622	0.547007	4.38061	1.1835e-05	6.49863e-05	serine:threonine protein kinase 11
Smp_162310	1110.68	-1.13405	0.258902	-4.38021	1.18566e-05	6.50661e-05	serrate RNA effector molecule
Smp_093980	16.1934	-3.74511	0.855072	-4.37988	1.18745e-05	6.51255e-05	hypothetical protein
Smp_128490	277.363	1.20713	0.275695	4.37851	1.19493e-05	6.54964e-05	syntaxin binding protein 5
Smp_022170	456.056	0.975383	0.22283	4.37725	1.20185e-05	6.58366e-05	tropomyosin
Smp_004080	249.486	-1.56248	0.357129	-4.37509	1.2138e-05	6.64512e-05	mitochondrial 2 oxoglutarate:malate carrier
Smp_046980	415.825	-1.0601	0.242378	-4.37375	1.22131e-05	6.68227e-05	pre mRNA splicing factor 38A
Smp_064350	2530.55	1.39793	0.319649	4.37332	1.22368e-05	6.69127e-05	Vacuolar ATP synthase 21 kDa proteolipid
Smp_061920	1667.88	0.67582	0.154686	4.36898	1.24829e-05	6.82177e-05	uv excision repair protein rad23 b
Smp_141670	16.4919	3.94606	0.90334	4.3683	1.25215e-05	6.83878e-05	hypothetical protein
Smp_142450	389.706	-1.25057	0.286377	-4.36688	1.26034e-05	6.87941e-05	Ras protein Rap 1b
Smp_094710	139.295	2.74245	0.628337	4.36462	1.27342e-05	6.94668e-05	alstrom syndrome protein
Smp_120700	1921.88	1.35879	0.311804	4.35784	1.3135e-05	7.16105e-05	Cofilin 1
Smp_145420	280.21	1.47449	0.338383	4.35745	1.31588e-05	7.16978e-05	plexin A3
Smp_153270	121.167	-2.31377	0.531379	-4.35427	1.33513e-05	7.27037e-05	MORN repeat containing protein 1
Smp_171000	8.13836	-4.41062	1.01317	-4.35327	1.34119e-05	7.29903e-05	hypothetical protein
Smp_019340	389.892	1.35931	0.312773	4.346	1.38641e-05	7.53618e-05	Tetraspanin 3
Smp_167300	74.1734	-2.52798	0.581677	-4.34602	1.38632e-05	7.53618e-05	hypothetical protein
Smp_076400	90.6436	1.93575	0.445635	4.3438	1.40041e-05	7.60777e-05	universal stress protein
Smp_197280	238.219	1.22774	0.282677	4.34327	1.40377e-05	7.62155e-05	phosphatidylinositol 4 phosphate 5 kinase type
Smp_162480	6.01641	4.90482	1.12988	4.34101	1.41832e-05	7.69598e-05	asparagine rich protein
Smp_203140	1246.64	1.05086	0.242088	4.34081	1.41958e-05	7.69827e-05	Minor histocompatibility antigen H13
Smp_155630	376.947	1.28708	0.296588	4.33964	1.42718e-05	7.7349e-05	hypothetical protein
Smp_140740	31.7419	2.56428	0.591221	4.33726	1.4427e-05	7.81443e-05	hypothetical protein
Smp_040970	1820.13	1.03146	0.237876	4.33612	1.45019e-05	7.85037e-05	vacuolar proton atpases
Smp_133900	11.1293	4.58543	1.05755	4.3359	1.45163e-05	7.8535e-05	indoleamine 2,3 dioxygenase 2
Smp_071410	76.1202	1.74784	0.403271	4.33417	1.46308e-05	7.9108e-05	PHD type zinc finger protein
Smp_175590	433.632	-3.74809	0.865563	-4.33023	1.48951e-05	8.04896e-05	proto oncogene tyrosine protein kinase receptor
Smp_160950	192.228	1.34413	0.310494	4.32901	1.49784e-05	8.08922e-05	zinc fingerprotein 1
Smp_052150	115.998	-2.10397	0.486088	-4.32836	1.50223e-05	8.10818e-05	hypothetical protein
Smp_141140	738.533	-1.31454	0.303855	-4.32622	1.5169e-05	8.18251e-05	arginine:serine rich coiled coil protein 2
Smp_027910	570.662	-1.12212	0.259547	-4.32338	1.53654e-05	8.2836e-05	Synembryn A
Smp_203440	4.36433	4.62592	1.0702	4.32248	1.54283e-05	8.31261e-05	hypothetical protein
Smp_087440	403.651	-1.31577	0.304603	-4.31964	1.56284e-05	8.41552e-05	39S ribosomal protein L3, mitochondrial
Smp_141830	43.618	3.9268	0.909161	4.31915	1.56633e-05	8.42933e-05	transcriptional enhancer factor tef
Smp_012340	361.603	-1.47103	0.340651	-4.31828	1.5725e-05	8.4576e-05	U3 small nucleolar RNA associated protein 14
Smp_132780	5.72852	-4.70658	1.09037	-4.31648	1.58535e-05	8.52171e-05	hypothetical protein
Smp_148110	16.1682	-3.82206	0.885891	-4.31436	1.60063e-05	8.59884e-05	transcription factor SOX 14
Smp_134990	29.557	2.99634	0.694576	4.3139	1.60396e-05	8.60664e-05	oxalate:formate antiporter
Smp_151110	240.736	-1.39513	0.323393	-4.31403	1.60305e-05	8.60664e-05	hypothetical protein
Smp_202970	31.118	2.02006	0.468325	4.31338	1.60778e-05	8.62212e-05	cytoplasmic actin
Smp_162650	66.9954	2.55503	0.592579	4.31171	1.61998e-05	8.68242e-05	anoctamin 10
Smp_203170	112.768	2.30499	0.534706	4.31077	1.62691e-05	8.71449e-05	hypothetical protein
Smp_203530	16.4895	-3.77101	0.875563	-4.30696	1.65516e-05	8.86068e-05	intraflagellar transport protein 172
Smp_132390	215.625	1.86958	0.434298	4.30485	1.67102e-05	8.94036e-05	hypothetical protein
Smp_143310	76.6686	-2.34169	0.544954	-4.29704	1.73097e-05	9.25571e-05	hypothetical protein
Smp_166920	44.5071	3.57226	0.831434	4.29651	1.73511e-05	9.27241e-05	PDZ and LIM domain protein Zasp
Smp_070030	67.9256	2.02381	0.471063	4.29627	1.73695e-05	9.27689e-05	Charged multivesicular body protein 2b A
Smp_213680	346.312	-1.18223	0.275482	-4.2915	1.7747e-05	9.46749e-05	replication factor c subunit 1
Smp_138330	116.645	-2.19427	0.511299	-4.29157	1.77415e-05	9.46749e-05	tetraspanin
Smp_165890	27.6572	3.29915	0.76893	4.29058	1.78211e-05	9.50148e-05	rab6 interacting protein 2:elks:erc:cast
Smp_164130	78.1681	2.25458	0.525529	4.29012	1.78576e-05	9.51543e-05	protein dopey 1
Smp_124820	1221.72	-1.11273	0.259383	-4.28991	1.78748e-05	9.51905e-05	chromosome region maintenance protein
Smp_169050	244.383	-1.41154	0.329073	-4.28945	1.79115e-05	9.52531e-05	solute carrier family 43
Smp_129140	79.0403	-1.42916	0.33318	-4.28946	1.7911e-05	9.52531e-05	methyltransferase METT10D
Smp_041740	3202.12	-1.60489	0.374155	-4.28937	1.79177e-05	9.52531e-05	t complex protein 1 subunit gamma
Smp_158840	142.387	-1.53263	0.357377	-4.28855	1.79842e-05	9.55515e-05	digestive organ expansion factor
Smp_010660	25.9069	3.15003	0.734695	4.28753	1.80674e-05	9.5938e-05	#N/A
Smp_084080	220.63	-1.12847	0.263388	-4.28443	1.83211e-05	9.72287e-05	peptidyl prolyl cis trans isomerase CWC27
Smp_147770	19.0105	2.62432	0.612569	4.28411	1.83469e-05	9.73097e-05	hypothetical protein
Smp_001940	194.757	1.14443	0.267196	4.28313	1.84285e-05	9.76859e-05	DREV protein
Smp_143420	92.9226	2.62373	0.612954	4.28047	1.86501e-05	9.88036e-05	#N/A
Smp_116360	928.419	-1.01639	0.237527	-4.27905	1.87695e-05	9.93789e-05	histone lysine N methyltransferase SETD2
Smp_196690	504.446	-1.57794	0.368786	-4.27875	1.87944e-05	9.93958e-05	Probable C terminal domain small phosphatase
Smp_194570	190.942	-2.10569	0.492127	-4.27876	1.87941e-05	9.93958e-05	WD repeat and SOCS box containing protein 1
Smp_163940	12.7122	4.77201	1.11543	4.27818	1.88427e-05	9.95941e-05	#N/A
Smp_140120	40.4002	2.93377	0.685906	4.27722	1.89241e-05	9.99665e-05	hypothetical protein
Smp_031390	61.1745	3.27603	0.766043	4.27656	1.89806e-05	0.000100207	hypothetical protein
Smp_133370	36.4617	2.57278	0.601689	4.27593	1.90344e-05	0.000100434	tetratricopeptide repeat protein 39B
Smp_084540	596.051	-1.15344	0.26983	-4.2747	1.91394e-05	0.00010093	angiogenic factor with G patch and FHA domains
Smp_156520	21.0327	-2.92157	0.684089	-4.27074	1.94821e-05	0.000102678	Centrosomal protein of 63 kDa
Smp_008320	525.46	1.63446	0.383398	4.26308	2.01625e-05	0.000106203	3'(2'), 5' bisphosphate nucleotidase
Smp_028440	1028.29	-1.07912	0.25317	-4.26244	2.02206e-05	0.000106448	adenosylhomocysteinase
Smp_058240	817.108	1.22288	0.286984	4.26113	2.03394e-05	0.000107012	Reticulon 4 (Neurite outgrowth inhibitor)
Smp_209040	470.557	1.28575	0.301954	4.25811	2.06165e-05	0.000108408	long chain fatty acid coenzyme A ligase
Smp_129670	102.287	2.47751	0.582257	4.25501	2.09036e-05	0.000109855	apoptosis stimulating of P53
Smp_136200	17.8366	3.10873	0.730866	4.25348	2.10473e-05	0.000110546	hypothetical protein
Smp_196480	38.7296	2.43244	0.572638	4.24777	2.15905e-05	0.000113335	hypothetical protein
Smp_071770	180.834	1.29684	0.305364	4.24685	2.16798e-05	0.000113738	rna exonuclease 1
Smp_031430	32.9133	2.37619	0.559573	4.24643	2.17203e-05	0.000113886	hypothetical protein
Smp_151590	34.2701	3.22095	0.759829	4.23904	2.24473e-05	0.00011763	Centrosomal protein of 135 kDa (Cep135 protein)
Smp_091650	689.102	1.86819	0.440999	4.23626	2.27271e-05	0.000119029	phospholipid transporting ATPase IIB
Smp_126140	27.186	4.01411	0.947875	4.23486	2.28696e-05	0.00011966	integrin alpha 5
Smp_074450	10.5545	3.35794	0.792935	4.23482	2.28736e-05	0.00011966	hypothetical protein
Smp_034850	29.7025	2.28969	0.540707	4.23462	2.2894e-05	0.000119698	TWiK family of potassium channels protein 7
Smp_068710	47.948	-1.97202	0.465778	-4.23382	2.29754e-05	0.000120055	hypothetical protein
Smp_194840	265.543	1.69682	0.400814	4.23343	2.30158e-05	0.000120198	Niemann Pick C2 protein
Smp_143270	2346.67	2.11503	0.499754	4.23214	2.31476e-05	0.000120818	hypothetical protein
Smp_126740	303.869	2.17276	0.513995	4.22719	2.36629e-05	0.000123437	scy1 protein 2
Smp_139400	46.0545	2.91549	0.690576	4.22182	2.42341e-05	0.000126345	tensin 1
Smp_076660	750.923	-1.42058	0.336516	-4.22142	2.42763e-05	0.000126493	DNA polymerase delta small subunit
Smp_149000	182.423	-2.01094	0.476469	-4.2205	2.43762e-05	0.000126941	protein phosphatase 2C
Smp_009520	292.869	-1.31583	0.312022	-4.21711	2.47458e-05	0.000128793	glutamyl tRNA synthetase
Smp_018280	572.999	-1.35749	0.322465	-4.20971	2.55695e-05	0.000133005	polynucleotide 5' hydroxyl kinase NOL9
Smp_180620	7.35589	4.20167	0.998831	4.20659	2.59258e-05	0.000134782	MEG 17
Smp_134720	136.483	1.90373	0.4527	4.20529	2.60751e-05	0.000135481	hypothetical protein
Smp_127820	364.221	1.83562	0.436932	4.20115	2.65564e-05	0.000137904	hypothetical protein
Smp_019040	233.411	-1.33671	0.318187	-4.20101	2.65731e-05	0.000137913	transcription factor cp2
Smp_123420	346.54	-1.20166	0.286282	-4.19745	2.69933e-05	0.000140014	aryl hydrocarbon receptor nuclear translocator
Smp_010720	28.6964	-3.16793	0.754887	-4.19656	2.70998e-05	0.000140487	elongation of fatty acids protein 1
Smp_134930	6.40488	4.38607	1.04533	4.19587	2.71828e-05	0.000140838	hypothetical protein
Smp_210340	273.617	-1.14342	0.272538	-4.19546	2.72318e-05	0.000141012	sirtuin 6
Smp_119050	18.8321	3.7196	0.887009	4.19342	2.74777e-05	0.000142206	collagen alpha chain
Smp_057630	204.362	0.791842	0.188859	4.19277	2.75565e-05	0.000142533	Activating signal cointegrator 1 complex subunit
Smp_036760	64.0216	-2.04335	0.487397	-4.19238	2.76044e-05	0.000142701	hypothetical protein
Smp_130300	621.632	1.88082	0.44872	4.19151	2.77102e-05	0.000143006	Na+:K+ ATPase alpha subunit
Smp_063760	124.456	-1.31036	0.312614	-4.19163	2.76963e-05	0.000143006	hypothetical protein
Smp_176110	149.941	-3.13076	0.74689	-4.19173	2.76834e-05	0.000143006	hypothetical protein
Smp_082360	70.4129	3.29063	0.785257	4.19051	2.78323e-05	0.000143555	protein tyrosine kinase
Smp_015780	160.718	-1.2586	0.300412	-4.18958	2.79471e-05	0.000144066	ATPase N2B
Smp_148500	18.8102	3.86445	0.922689	4.18825	2.81112e-05	0.000144831	hypothetical protein
Smp_027430	92.3449	2.20046	0.525429	4.18792	2.81523e-05	0.000144961	EF hand domain containing family member A2
Smp_139050	87.7535	3.1862	0.760842	4.18773	2.81755e-05	0.000145	GTP binding protein GEM
Smp_003110	34.3826	2.954	0.70563	4.18633	2.83498e-05	0.000145815	Nadrin protein
Smp_165680	442.589	1.3514	0.322876	4.18549	2.84548e-05	0.000146273	UNC93 protein MFSD11 like
Smp_149500	253.801	-1.45208	0.347008	-4.18457	2.85704e-05	0.000146785	eukaryotic elongation factor 2 kinase
Smp_159790	127.926	2.66789	0.637886	4.1824	2.88452e-05	0.000148114	kinesin family A
Smp_201250	4.72115	4.43934	1.06163	4.18163	2.89431e-05	0.000148534	annexin
Smp_077860	9.91086	4.94381	1.18375	4.1764	2.96156e-05	0.0001519	actin
Smp_034410	586.212	1.18637	0.284135	4.17539	2.97478e-05	0.000152493	cathepsin F (C01 family)
Smp_074370	499.869	-1.02496	0.245649	-4.17247	3.01313e-05	0.000154372	pre mRNA processing factor 17
Smp_120640	918.929	-1.3302	0.318908	-4.17111	3.03118e-05	0.000155211	hypothetical protein
Smp_157230	245.584	1.56768	0.375905	4.1704	3.04067e-05	0.00015561	adenosine 3' phospho 5' phosphosulfate
Smp_135790	301.428	1.72322	0.413219	4.17025	3.04269e-05	0.000155626	Intersectin 1
Smp_093930	215.264	2.16316	0.518909	4.16867	3.06376e-05	0.000156617	Receptor Tyrosine Kinase, putative
Smp_174040	239.461	1.7761	0.426401	4.16533	3.10908e-05	0.000158845	lachesin
Smp_033660	282.534	-1.50918	0.362371	-4.16475	3.11691e-05	0.000159157	N acetylglucosamine 6 phosphate
Smp_157250	286.601	-1.31698	0.31629	-4.16383	3.12949e-05	0.00015971	hypothetical protein
Smp_004190	1669.08	1.42407	0.34207	4.16309	3.13976e-05	0.000160145	cationic amino acid transporter 4
Smp_122920	271.545	-0.956569	0.229814	-4.16237	3.14968e-05	0.000160562	POU domain, class 2, transcription factor
Smp_157360	1995.36	1.76382	0.4242	4.158	3.21045e-05	0.000163569	E3 ubiquitin protein ligase synoviolin B
Smp_004440	141.835	2.96065	0.712236	4.15683	3.22693e-05	0.00016424	hypothetical protein
Smp_073830	278.519	-1.4522	0.349353	-4.15681	3.22721e-05	0.00016424	integrator complex subunit 11
Smp_203290	119.397	-2.06663	0.497382	-4.15502	3.2526e-05	0.000165441	hypothetical protein
Smp_084320	262.801	1.29565	0.311905	4.15398	3.26735e-05	0.000166099	ethanolaminephosphotransferase 1
Smp_174990	499.325	1.05183	0.253382	4.15116	3.30796e-05	0.000168071	endo beta N acetylglucosaminidase
Smp_156800	22.1472	3.00941	0.725027	4.15076	3.31375e-05	0.000168251	hypothetical protein
Smp_210910	35.0876	2.17411	0.523799	4.15066	3.31517e-05	0.000168251	#N/A
Smp_076320	9.98871	-4.29659	1.0355	-4.14927	3.3353e-05	0.000169179	hypothetical protein
Smp_169180	186.835	1.94134	0.468156	4.14678	3.37179e-05	0.000170935	E3 ubiquitin protein ligase HECTD1
Smp_181080	63.5361	3.18237	0.767543	4.14617	3.38076e-05	0.000171296	hypothetical protein
Smp_166080	996.307	-1.24746	0.300999	-4.14439	3.40716e-05	0.000172538	striatin
Smp_162980	59.9655	2.54381	0.614828	4.13743	3.51221e-05	0.000177662	rhodopsin orphan GPCR
Smp_146400	221.385	1.16456	0.281466	4.13747	3.51149e-05	0.000177662	syntaxin binding protein 1
Smp_152300	110.793	-1.63319	0.394763	-4.13715	3.51648e-05	0.00017778	hypothetical protein
Smp_196800	344.283	-0.958138	0.231681	-4.13559	3.54051e-05	0.000178896	PHD finger protein 14
Smp_146470	58.4605	3.13633	0.758494	4.13494	3.55047e-05	0.000179301	hypothetical protein
Smp_123350	97.2042	2.91966	0.706229	4.13415	3.56273e-05	0.000179738	galanin receptor type 2
Smp_047860	293.942	-1.29796	0.313961	-4.13413	3.56304e-05	0.000179738	ribosomal pseudouridine synthase
Smp_097730	367.771	1.40189	0.339149	4.13354	3.57214e-05	0.000180098	serum response factor
Smp_004600	2798.93	-1.31467	0.318344	-4.1297	3.63232e-05	0.000183031	T complex protein 1 subunit delta
Smp_082620	1489.53	1.36002	0.329404	4.12872	3.64786e-05	0.000183714	farnesylated protein converting enzyme 1
Smp_150490	56.1772	2.6457	0.641137	4.12657	3.68217e-05	0.00018534	hypothetical protein
Smp_176460	186.057	-1.29697	0.314332	-4.12612	3.68939e-05	0.000185602	hypothetical protein
Smp_137700	13.506	3.20378	0.776659	4.12507	3.70615e-05	0.000186343	Zinc finger, C2H2 type domain containing protein
Smp_150130	120.895	1.51772	0.368311	4.12075	3.77633e-05	0.000189767	hypothetical protein
Smp_101450	2784.24	-1.21104	0.293958	-4.11978	3.79228e-05	0.000190464	large subunit ribosomal protein l7e
Smp_090890	140.213	2.21499	0.537957	4.11741	3.83155e-05	0.000192332	proto oncogene serine:threonine protein kinase
Smp_163500	8.7216	3.87139	0.941749	4.11085	3.942e-05	0.000197768	Protein Sprint
Smp_158760	49.5498	2.9849	0.726866	4.10654	4.01632e-05	0.000201386	dynein beta chain, ciliary
Smp_199790	13.6802	3.74585	0.912513	4.10499	4.04338e-05	0.000202633	alpha(13)fucosyltransferase
Smp_011680	1997.56	1.31376	0.320052	4.10483	4.04613e-05	0.00020266	CD36 class B scavenger receptor
Smp_031010	290.788	-0.97992	0.238795	-4.10361	4.0675e-05	0.000203619	eukaryotic initiation factor 4A III
Smp_212720	14.9031	3.05887	0.745806	4.10143	4.10612e-05	0.00020544	methylmalonyl CoA epimerase, putative
Smp_074070	291.853	-1.44089	0.35136	-4.10089	4.1156e-05	0.000205803	DNA repair protein XRCC1
Smp_124980	54.0726	2.27589	0.555038	4.10042	4.12394e-05	0.000206107	Tumor necrosis factor, alpha induced protein
Smp_186740	138.329	-1.49077	0.363578	-4.10028	4.12652e-05	0.000206124	hypothetical protein
Smp_057790	12.2309	3.62002	0.882924	4.10004	4.1308e-05	0.000206226	fibrocystin l
Smp_125440	70.2012	3.21945	0.785776	4.09716	4.18245e-05	0.000208691	FERM domain containing protein 5
Smp_163340	185.116	-1.96445	0.479497	-4.0969	4.18721e-05	0.000208815	protein timeless
Smp_157980	122.829	1.90216	0.464506	4.09502	4.22128e-05	0.000210399	hypothetical protein
Smp_136530	32.5912	2.19837	0.537117	4.0929	4.26002e-05	0.000212215	Palmitoyltransferase ZDHHC17
Smp_129950	1924.77	-1.63344	0.399188	-4.0919	4.27846e-05	0.000213018	RNA binding protein 12
Smp_144560	212.585	-0.940284	0.229804	-4.09168	4.28262e-05	0.00021311	Nucleobindin 2
Smp_027000	544.83	0.834908	0.204066	4.09136	4.28842e-05	0.000213282	abhydrolase domain containing protein FAM108C1
Smp_051530	591.855	-1.30512	0.319163	-4.0892	4.32856e-05	0.000215162	heterogeneous nuclear ribonucleoprotein l
Smp_045250	183.902	-1.55863	0.381224	-4.08849	4.34189e-05	0.000215708	cleavage stimulation factor subunit 1
Smp_062720	2780.12	-1.2177	0.29819	-4.08362	4.43386e-05	0.000220158	e1b 55 kda associated protein
Smp_092170	323.105	-1.25415	0.307182	-4.08276	4.4504e-05	0.00022086	regulation of nuclear pre mRNA domain containing protein
Smp_070600	598.213	-0.946424	0.231843	-4.08217	4.46167e-05	0.0002213	transaldolase
Smp_150700	79.4892	-2.02617	0.496547	-4.08052	4.49358e-05	0.000222762	aldo keto reductase family 1, member B4
Smp_044680	611.362	0.743484	0.18225	4.07948	4.51364e-05	0.000223636	hypothetical protein
Smp_142780	170.166	-1.47738	0.362164	-4.07932	4.51677e-05	0.00022367	retinoblastoma binding protein 5
Smp_127930	221.744	1.82654	0.447872	4.07826	4.53737e-05	0.000224569	hypothetical protein
Smp_203190	5428.08	1.90769	0.468009	4.07618	4.57806e-05	0.000226461	hypothetical protein
Smp_155090	13.4307	-3.04015	0.746916	-4.07027	4.69582e-05	0.000232161	stem cell tumor
Smp_171600	50.3787	2.18519	0.537213	4.06764	4.74913e-05	0.000234544	hypothetical protein
Smp_006630	404.916	-1.46834	0.360981	-4.06764	4.74913e-05	0.000234544	myb binding protein
Smp_166030	1078.25	2.17179	0.534021	4.06686	4.76513e-05	0.000235208	erythrocyte membrane protein
Smp_091000	10.9906	4.16657	1.02461	4.06648	4.77279e-05	0.00023546	transmembrane protein 151B
Smp_000460	919.982	-0.976777	0.240241	-4.06583	4.78624e-05	0.000235996	Nice 4 protein
Smp_134350	29.4741	3.21077	0.789721	4.0657	4.78893e-05	0.000236002	thyrotropin releasing hormone receptor
Smp_145250	191.516	1.29431	0.318608	4.06239	4.85734e-05	0.000239245	hypothetical protein
Smp_019060	356.902	1.90392	0.468854	4.06079	4.89061e-05	0.000240625	sec61 beta subunit
Smp_140560	212.355	-2.27158	0.559377	-4.0609	4.8883e-05	0.000240625	TLC domain containing protein 2
Smp_155100	21.2115	-2.79423	0.68816	-4.06043	4.8982e-05	0.00024087	family S54 unassigned peptidase (S54 family)
Smp_172010	6.02745	-4.20329	1.03523	-4.06026	4.90178e-05	0.000240917	caspase 7 (C14 family)
Smp_096720	506.061	1.18711	0.292416	4.05964	4.91478e-05	0.000241414	Lissencephaly type 1 y
Smp_000890	220.137	-1.17465	0.289357	-4.05953	4.91716e-05	0.000241414	nucleoporin nup53
Smp_024800	107.297	-1.74633	0.430381	-4.05764	4.95719e-05	0.000243249	N6 adenine specific DNA methyltransferase 1
Smp_063930	34.4804	3.54236	0.873203	4.05674	4.97632e-05	0.000243927	voltage gated potassium channel
Smp_157910	101.694	-1.72703	0.425709	-4.05684	4.97408e-05	0.000243927	hypothetical protein
Smp_155130	8.59598	3.36441	0.829448	4.05621	4.98763e-05	0.000244351	hypothetical protein
Smp_157740	261.642	-1.57875	0.38936	-4.05472	5.01938e-05	0.000245775	DNA directed RNA polymerase III subunit RPC1
Smp_077610	6.53866	3.98184	0.982239	4.05384	5.03831e-05	0.000246571	hypothetical protein
Smp_137020	34.6515	2.52775	0.624242	4.04931	5.13682e-05	0.000251258	phosphatidylinositol transfer protein alpha
Smp_144850	440.278	1.84322	0.456133	4.04098	5.32287e-05	0.00026022	oxysterol binding protein 1
Smp_213310	61.6221	1.5471	0.38305	4.03891	5.37005e-05	0.000262387	guanylate kinase, putative
Smp_145900	9.55856	3.79089	0.938915	4.03752	5.40193e-05	0.000263804	sphingolipid delta(4) desaturase:C4 hydroxylase
Smp_200330	194.78	-0.804218	0.199214	-4.03696	5.41489e-05	0.000264296	threonyl tRNA synthetase
Smp_009830	896.616	1.46422	0.362805	4.03584	5.44063e-05	0.000265394	translocon associated protein subunit beta
Smp_186020	53.4109	-2.48003	0.614518	-4.03573	5.44317e-05	0.000265394	major egg antigen
Smp_137660	52.3199	-3.24546	0.804803	-4.03262	5.51592e-05	0.000268799	kinesin protein KIF20A
Smp_149270	85.6098	2.86023	0.709562	4.03098	5.55455e-05	0.000270538	hypothetical protein
Smp_198850	381.677	0.891309	0.221185	4.0297	5.58486e-05	0.000271869	vacuolar sorting protein SNF8
Smp_086900	462.845	1.50637	0.373829	4.02956	5.58814e-05	0.000271885	ADP ribosylation factor protein 1 like
Smp_098950	475.619	-0.756492	0.187815	-4.02785	5.62902e-05	0.000273729	tata box binding protein
Smp_169430	125.022	1.84733	0.458761	4.02678	5.65457e-05	0.000274826	partitioning defective 3
Smp_213500	58.0961	2.20938	0.549177	4.02308	5.74408e-05	0.000278994	acyl coenzyme A thioesterase
Smp_078090	617.744	-0.851044	0.211545	-4.02299	5.74642e-05	0.000278994	DNA binding SAP,domain containing protein
Smp_157800	223.037	-1.70159	0.422986	-4.02281	5.75075e-05	0.000279057	nucleolar rna helicase 2
Smp_197020	352.014	1.5293	0.380171	4.02265	5.75478e-05	0.000279105	nucleolar protein c7c
Smp_098340	98.7207	2.22036	0.552075	4.02184	5.77449e-05	0.000279891	gamma glutamylcyclotransferase
Smp_173920	46.6607	-2.67767	0.665799	-4.02174	5.77708e-05	0.000279891	hypothetical protein
Smp_135280	270.743	3.07108	0.765059	4.01417	5.96557e-05	0.000288871	brefeldin A inhibited guanine
Smp_035190	114.779	1.84148	0.458951	4.01236	6.01158e-05	0.000290945	ras GTP exchange factor son of sevenless
Smp_064600	208.58	-0.9597	0.239359	-4.00947	6.08561e-05	0.000294373	Sjoegren syndrome:scleroderma autoantigen 1
Smp_164410	496.256	-1.09942	0.274338	-4.00753	6.13564e-05	0.000296637	transportin 3
Smp_077310	10.3255	3.93613	0.982301	4.00705	6.14824e-05	0.000297089	tegument-allergen-like protein
Smp_166210	168.426	-1.00978	0.252094	-4.00558	6.18648e-05	0.00029878	#N/A
Smp_084870	447.921	-1.05733	0.264059	-4.00414	6.22431e-05	0.000300449	pre mRNA cleavage complex 2 protein Pcf11
Smp_143520	27.9434	2.53911	0.634187	4.00372	6.23537e-05	0.000300825	hypothetical protein
Smp_083130	204.406	-1.04339	0.26063	-4.00332	6.24598e-05	0.000301178	beta3 glucuronyltransferase
Smp_074930	1068.26	1.20843	0.301963	4.00192	6.28299e-05	0.000302804	palmitoyltransferase ZDHHC20
Smp_027870	315.929	1.93493	0.483567	4.00137	6.29773e-05	0.000303355	melanoma inhibitory activity protein 3
Smp_004990	3056.25	-1.46934	0.367353	-3.99979	6.33979e-05	0.000305221	T complex protein 1 subunit zeta
Smp_150640	378.499	2.36192	0.591049	3.99616	6.4379e-05	0.000309782	hypothetical protein
Smp_174090	47.4984	3.30505	0.827144	3.99574	6.44938e-05	0.000310172	coiled coil domain containing protein 40
Smp_167200	310.918	-1.56203	0.390948	-3.9955	6.45579e-05	0.000310317	ATPase family AAA domain containing protein 3 B
Smp_104960	436.757	0.688954	0.172626	3.99102	6.57907e-05	0.000315912	syntaxin 6
Smp_006700	277.561	-1.94341	0.486933	-3.99112	6.57627e-05	0.000315912	zinc finger protein 106
Smp_000310	727.19	1.52407	0.381934	3.9904	6.5962e-05	0.000316569	transmembrane protein 41B
Smp_063420	2167.85	-1.19636	0.299915	-3.98899	6.63556e-05	0.000318292	chaperonin containing TCP1, subunit 5 (epsilon)
Smp_135380	6.92328	4.67205	1.17223	3.9856	6.73103e-05	0.000322703	hunchback
Smp_093370	256.627	-1.07657	0.270244	-3.98368	6.7857e-05	0.000324984	hypothetical protein
Smp_156590	237.843	-1.43817	0.361008	-3.98376	6.78339e-05	0.000324984	Filamin C
Smp_163610	145.385	1.63019	0.409232	3.98355	6.78936e-05	0.00032499	GST class mu
Smp_033870	301.391	-1.2156	0.305257	-3.98222	6.82755e-05	0.000326648	hypothetical protein
Smp_066820	443.137	-1.36718	0.343404	-3.98126	6.85514e-05	0.000327797	integrator complex subunit 6
Smp_132590	235.332	-1.91004	0.480187	-3.9777	6.95839e-05	0.000332561	CCAAT:enhancer binding protein (C:EBP), zeta
Smp_166990	42.5022	-2.075	0.521809	-3.97656	6.99206e-05	0.000333996	72 kDa inositol polyphosphate 5 phosphatase
Smp_140680	1076.25	1.56512	0.393707	3.97535	7.02769e-05	0.000335524	endothelial differentiation factor 1
Smp_199700	129.767	1.59165	0.40042	3.97494	7.03959e-05	0.000335917	stromal cell derived factor 2
Smp_172750	31.1314	2.38361	0.600039	3.97243	7.11436e-05	0.000339309	cation transporting atpase worm
Smp_156510	49.876	3.18476	0.801972	3.97117	7.1521e-05	0.000340932	PDZ and LIM domain protein 7
Smp_050470	274.105	-1.56743	0.394803	-3.97015	7.18285e-05	0.00034222	transducin beta protein 3 like
Smp_049000	358.712	-1.03846	0.261673	-3.96853	7.23183e-05	0.000344375	SURP and G patch domain containing protein 1
Smp_040960	191.24	-1.0042	0.253435	-3.96235	7.42148e-05	0.000353223	zinc finger protein xfin
Smp_180960	47.7362	2.33263	0.588753	3.96198	7.43309e-05	0.000353402	anion exchange protein 3
Smp_149110	216.653	2.14713	0.54195	3.96186	7.43679e-05	0.000353402	hypothetical protein
Smp_126720	450.443	-1.07128	0.270384	-3.96206	7.43051e-05	0.000353402	pre mRNA splicing factor ISY1
Smp_063250	378.006	-1.07459	0.271246	-3.96169	7.44211e-05	0.000353471	ubiquinol cytochrome c reductase complex
Smp_146830	101.443	-1.58596	0.400364	-3.96131	7.45396e-05	0.000353851	solute carrier family 16 protein
Smp_159690	255.36	-1.10358	0.278911	-3.95673	7.59812e-05	0.000360508	nuclear pore complex protein nup85
Smp_095630	1877.41	1.11122	0.280964	3.95502	7.65279e-05	0.000362915	Tetraspanin,IPR000301 CD9:CD37:CD63
Smp_079740	921.028	-0.871339	0.220335	-3.9546	7.66613e-05	0.000363359	Cullin 2
Smp_033990	420.87	1.51991	0.384466	3.9533	7.70801e-05	0.000365156	dynactin subunit 5
Smp_177780	16.8865	3.34634	0.846561	3.95287	7.72207e-05	0.000365633	hypothetical protein
Smp_066710	76.9128	-1.65344	0.418329	-3.95248	7.73467e-05	0.000366041	hypothetical protein
Smp_097660	3174.76	-1.34768	0.341085	-3.95115	7.7778e-05	0.000367893	eukaryotic initiation factor 4A
Smp_029520	43.534	2.31432	0.585859	3.95031	7.8049e-05	0.000368984	actin binding lim protein 1
Smp_125160	218.88	2.10146	0.532028	3.9499	7.81829e-05	0.000369427	smoothened
Smp_162500	20.945	2.86528	0.725914	3.94714	7.90917e-05	0.000373529	drug efflux protein
Smp_123990	347.723	-0.865833	0.219504	-3.94449	7.99691e-05	0.000377479	threonyl tRNA synthetase
Smp_147860	17.2267	4.12495	1.04599	3.94358	8.02741e-05	0.000378656	transient receptor potential ion channel A
Smp_061940	857.359	1.37056	0.34755	3.9435	8.0301e-05	0.000378656	adenylate kinase
Smp_149080	132.941	1.69342	0.429555	3.94227	8.07153e-05	0.000380322	protein FAM160A1
Smp_131380	41.1428	-1.63828	0.415574	-3.9422	8.07372e-05	0.000380322	hypothetical protein
Smp_157010	18.5736	2.85402	0.724052	3.94173	8.0897e-05	0.00038088	titin
Smp_083790	266.404	-1.33208	0.338111	-3.93977	8.15609e-05	0.000383809	bromodomain containing protein 7
Smp_132040	19.1781	2.40835	0.611608	3.93773	8.22547e-05	0.000386875	DnaJ protein subfamily C 8
Smp_142790	25.153	3.46926	0.881292	3.93656	8.26566e-05	0.000388566	guanine nucleotide binding protein alpha
Smp_114540	22.349	2.6607	0.676101	3.93536	8.30711e-05	0.000390315	hypothetical protein
Smp_128350	17.5697	-2.74696	0.698475	-3.9328	8.39623e-05	0.0003943	PR domain zinc finger protein 1
Smp_138920	568.454	-1.29481	0.329262	-3.93245	8.40844e-05	0.000394672	COP9 signalosome complex subunit
Smp_008500	707.361	-0.800922	0.203784	-3.93025	8.48592e-05	0.000398105	protein iws1
Smp_151640	23.6965	-3.52132	0.895989	-3.93009	8.49134e-05	0.000398156	hypothetical protein
Smp_130810	34.4064	3.19436	0.814046	3.92406	8.70704e-05	0.000408062	dynein heavy chain
Smp_168650	84.6683	1.9664	0.501533	3.92077	8.82665e-05	0.000413246	microtubule actin cross linking factor 1
Smp_034670	431.842	-1.23379	0.314675	-3.92083	8.82432e-05	0.000413246	tubulin gamma 1 chain
Smp_212000	378.867	0.867279	0.221447	3.91641	8.98769e-05	0.000420571	signal recognition particle 72 kDa subunit
Smp_004200	172.999	1.32439	0.338219	3.91578	9.01124e-05	0.000421458	PPPDE peptidase domain containing protein
Smp_047700	213.563	1.79676	0.459018	3.91435	9.06465e-05	0.00042374	ring h2 finger protein atl5
Smp_058780	186.59	-1.10987	0.283696	-3.91219	9.14633e-05	0.000427341	leukocyte receptor cluster
Smp_094820	616.695	0.772998	0.197627	3.91139	9.17663e-05	0.000428538	vacuolar protein sorting associated protein VTA1
Smp_210220	41.3961	-1.62908	0.41653	-3.91107	9.18864e-05	0.000428881	LRP2 binding protein
Smp_044020	258.094	-1.29865	0.332121	-3.91019	9.2225e-05	0.000430243	mitochondrial folate transporter:carrier
Smp_066720	29.1511	-2.14128	0.54793	-3.90794	9.30846e-05	0.000434032	Transcriptional adapter 2B
Smp_130330	171.525	-1.7819	0.456051	-3.90723	9.33611e-05	0.000435101	hypothetical protein
Smp_068280	313.737	1.5643	0.400398	3.90685	9.35062e-05	0.000435556	prolyl 4 hydroxylase subunit alpha 2
Smp_199940	111.739	1.10663	0.28342	3.90455	9.44005e-05	0.000439498	transmembrane 9 superfamily protein member
Smp_153180	63.838	3.41282	0.874188	3.90399	9.46189e-05	0.000440292	striated muscle preferentially expressed protein
Smp_123620	445.788	1.03479	0.265116	3.90316	9.49463e-05	0.000441592	hypothetical protein
Smp_128950	199.005	1.17494	0.30147	3.89738	9.72388e-05	0.000451796	tankyrase 1
Smp_058620	483.666	-1.51003	0.38744	-3.89745	9.72097e-05	0.000451796	serine:threonine protein kinase doa
Smp_104580	311.917	-1.41314	0.362749	-3.89564	9.79393e-05	0.000454821	ribulose phosphate epimerase
Smp_204720	6.95155	4.17115	1.07088	3.89508	9.81661e-05	0.000455532	SAM pointed domain containing ETS transcription
Smp_150020	147.943	1.65747	0.425536	3.89502	9.81917e-05	0.000455532	Amyloid beta A4 protein binding family
Smp_148370	290.766	2.00871	0.515737	3.89484	9.82641e-05	0.000455638	thyroid receptor interacting protein 11
Smp_138810	36.7365	-2.74594	0.705264	-3.89349	9.88141e-05	0.000457957	Post GPI attachment to protein factor 2
Smp_085480	350.559	-0.94067	0.241712	-3.8917	9.9544e-05	0.000461107	histone deacetylase complex subunit sap18
Smp_165930	194.162	1.57287	0.404207	3.89125	9.97303e-05	0.000461737	flightless I
Smp_135160	78.2767	2.00666	0.515913	3.88952	0.000100441	0.000464794	Dual specificity protein phosphatase 10
Smp_174680	176.616	-1.17011	0.30092	-3.88844	0.000100891	0.000466638	Diphthamide biosynthesis protein 2
Smp_176530	280.135	-1.38637	0.356567	-3.88811	0.000101029	0.000467043	hypothetical protein
Smp_170640	7.13131	4.18817	1.07796	3.88527	0.000102216	0.000472293	microsomal triglyceride transfer protein large
Smp_194750	5.35549	4.19512	1.0803	3.88328	0.000103057	0.000475939	protein SPATIAL
Smp_193350	10.3152	-3.75987	0.968388	-3.88261	0.000103343	0.000477018	cadherin EGF LAG seven pass G type receptor
Smp_119020	60.0413	-1.83228	0.471967	-3.88223	0.000103505	0.000477527	hypothetical protein
Smp_176720	29.372	2.38042	0.613364	3.88092	0.000104061	0.000479849	lipoma HMGIC fusion partner 3 protein like
Smp_161640	24.1835	2.81538	0.72551	3.88056	0.000104217	0.000480331	transient receptor potential cation channel
Smp_104310	59.4201	-2.04066	0.525887	-3.88042	0.000104276	0.000480359	rab11
Smp_041700	112.756	1.97639	0.509367	3.88009	0.000104417	0.000480529	G protein coupled receptor fragment
Smp_087810	610.609	-1.16797	0.30101	-3.88018	0.000104378	0.000480529	nucleolar GTP binding protein 2
Smp_153970	256.28	1.54531	0.398326	3.87952	0.000104663	0.00048142	RILP protein
Smp_005190	248.411	1.3989	0.360619	3.87917	0.000104814	0.000481873	mitogen activated protein kinase kinase kinase
Smp_033040	291.983	1.3993	0.360738	3.879	0.000104888	0.000481972	L lactate dehydrogenase
Smp_176810	400.566	1.13343	0.292265	3.87808	0.000105282	0.00048354	ELAV protein 2
[truncated: 8,832 more rows]

## Sheet: TSP-2_v_IR_rest_DESeq2.csv
	baseMean	log2FoldChange	lfcSE	stat	pvalue	padj
Smp_053640	1240.04	7.69504	0.333049	23.1048	4.14281e-118	3.80351e-114	hypothetical protein
Smp_171720	1269.65	5.98073	0.264774	22.588	5.68257e-113	2.60858e-109	lipid phosphate phosphohydrolase 1
Smp_135530	5193.73	7.63906	0.341666	22.3583	1.00307e-110	3.06972e-107	leishmanolysin peptidase
Smp_163720	768.542	5.78505	0.264226	21.8944	2.93946e-106	6.7468e-103	endophilin B1
Smp_147670	516.726	8.87331	0.437099	20.3005	1.27385e-91	2.33904e-88	Receptor kinase I-interacting protein SIP
Smp_148080	1215.18	10.6571	0.53197	20.0332	2.82783e-89	4.32705e-86	hypothetical protein
Smp_158890	747.56	8.46373	0.46868	18.0586	6.74562e-73	8.84736e-70	MEG 16
Smp_125810	386.607	8.5931	0.4871	17.6414	1.18592e-69	1.36099e-66	zinc finger protein 112
Smp_176940	972.545	5.88423	0.334501	17.5911	2.88396e-69	2.94196e-66	cationic amino acid transporter
Smp_132740	2089.74	8.66294	0.492911	17.5751	3.82435e-69	3.51114e-66	fatty acid desaturase 2
Smp_129010	500.391	7.85018	0.456958	17.1792	3.79962e-66	3.1713e-63	hypothetical protein
Smp_163710	2040.84	8.1789	0.482723	16.9433	2.15771e-64	1.65083e-61	MEG 6
Smp_140330	358.625	5.2845	0.314929	16.78	3.42011e-63	2.41539e-60	epsin 4:enthoprotin
Smp_122630	1249.32	12.2934	0.733939	16.7499	5.67523e-63	3.72174e-60	MEG 1
Smp_200180	680.187	6.54925	0.411091	15.9314	3.83639e-57	2.34812e-54	dynein light chain
Smp_181530	767.511	10.5892	0.664978	15.9241	4.31162e-57	2.47406e-54	cd63 antigen
Smp_169460	228.488	7.774	0.488949	15.8994	6.39895e-57	3.45581e-54	RAB18, member RAS oncogene family
Smp_187070	317.788	7.37746	0.465302	15.8552	1.2945e-56	6.60267e-54	hypothetical protein
Smp_197730	339.844	9.51073	0.607359	15.6591	2.87725e-55	1.39032e-52	rrm containing protein seb 4
Smp_164170	675.439	7.40158	0.479335	15.4414	8.6269e-54	3.96018e-51	endoglycoceramidase
Smp_151440	427.909	6.6617	0.433072	15.3825	2.14647e-53	9.38415e-51	hypothetical protein
Smp_213750	362.587	5.02144	0.329228	15.2522	1.59233e-52	6.64507e-50	putative sugar transporter
Smp_035290	245.935	9.5071	0.625709	15.1941	3.86784e-52	1.54394e-49	hypothetical protein
Smp_171860	709.531	4.78001	0.316366	15.1091	1.41027e-51	5.35653e-49	hypothetical protein
Smp_195040	188.837	5.33304	0.35302	15.1069	1.45859e-51	5.35653e-49	plastin 2
Smp_166860	995.753	12.2455	0.813248	15.0575	3.08127e-51	1.08804e-48	hypothetical protein
Smp_079860	1091.7	3.31783	0.223083	14.8726	4.96308e-50	1.68763e-47	o acyltransferase (membrane bound) domain
Smp_040680	1133.13	5.58501	0.378585	14.7523	2.97259e-49	9.7469e-47	dynein light chain
Smp_143750	207.837	5.38052	0.364954	14.743	3.41204e-49	1.08021e-46	transmembrane protein 63A
Smp_017860	366.642	3.01179	0.204874	14.7007	6.37768e-49	1.95178e-46	hypothetical protein
Smp_212790	304.29	9.54008	0.649662	14.6847	8.0821e-49	2.39361e-46	histone deacetylase, putative
Smp_045200	199.257	5.06102	0.345223	14.6601	1.1606e-48	3.32982e-46	tegument-allergen-like protein
Smp_188780	203.767	7.79512	0.533136	14.6213	2.05578e-48	5.71942e-46	hypothetical protein
Smp_200800	2707.12	-5.17848	0.355623	-14.5617	4.92036e-48	1.32671e-45	hypothetical protein
Smp_187010	234.88	6.55283	0.450062	14.5598	5.05771e-48	1.32671e-45	hypothetical protein
Smp_195180	767.289	9.9286	0.689425	14.4013	5.0789e-47	1.29526e-44	antigenic integral membrane glycoprotein
Smp_051080	758.153	3.11525	0.217215	14.3418	1.19949e-46	2.97636e-44	clathrin light chain
Smp_156930	399.721	10.9085	0.760857	14.3371	1.28349e-46	3.10099e-44	hypothetical protein
Smp_101970	1286.98	7.25516	0.512595	14.1538	1.7696e-45	4.16582e-43	Placenta specificprotein 8 protein (C15 protein)
Smp_141290	1630.1	3.34666	0.236545	14.1481	1.91822e-45	4.40279e-43	innexin
Smp_155620	449.68	3.99592	0.283998	14.0702	5.78764e-45	1.29601e-42	hypothetical protein
Smp_176450	443.17	10.9928	0.781855	14.0599	6.6983e-45	1.46422e-42	ATP binding cassette sub family A
Smp_154840	397.921	2.98226	0.212321	14.046	8.15037e-45	1.7402e-42	hypothetical protein
Smp_194980	487.749	5.94917	0.425173	13.9924	1.73556e-44	3.62139e-42	25 kDa integral membrane protein
Smp_037230	987.602	5.39962	0.387397	13.9382	3.71227e-44	7.57385e-42	fimbrin
Smp_044680	611.362	2.58099	0.187339	13.7771	3.50005e-43	6.98565e-41	hypothetical protein
Smp_144960	416.523	5.81462	0.424315	13.7035	9.66882e-43	1.88871e-40	FTS and Hook interacting protein
Smp_210790	2172.98	3.2932	0.241308	13.6473	2.09549e-42	4.00806e-40	transmembrane BAX inhibitor motif containing
Smp_051810	1563.35	3.37565	0.247539	13.6369	2.41744e-42	4.52949e-40	elongation of very long chain fatty acids
Smp_203380	207.922	7.2626	0.536261	13.543	8.7104e-42	1.5994e-39	hypothetical protein
Smp_127710	368.792	8.65926	0.644016	13.4457	3.26179e-41	5.87186e-39	hypothetical protein
Smp_018170	432.56	5.28162	0.39928	13.2279	6.05892e-40	1.06975e-37	zinc finger protein
Smp_201060	547.384	4.39895	0.33369	13.1827	1.10318e-39	1.911e-37	dynein light chain
Smp_051660	365.652	4.25475	0.325298	13.0796	4.30936e-39	7.32672e-37	hypothetical protein
Smp_002150	430.801	4.18212	0.323457	12.9295	3.06911e-38	5.12319e-36	trypsin-like serine protease
Smp_190970	237.309	4.51788	0.349711	12.9189	3.52109e-38	5.77271e-36	phosphatidylcholine transfer protein
Smp_129350	181.297	4.29603	0.335146	12.8184	1.29364e-37	2.08366e-35	ras and EF hand domain containing protein
Smp_090080	2159.38	3.5563	0.279196	12.7377	3.6514e-37	5.77992e-35	Estrogen regulated protein EP45
Smp_099810	137.858	4.35727	0.342475	12.7229	4.41178e-37	6.86518e-35	telomerase protein component
Smp_145920	193.266	9.22094	0.732018	12.5966	2.20434e-36	3.37301e-34	protein tyrosine sulfotransferase
Smp_181470	256.512	5.67576	0.45197	12.5578	3.60114e-36	5.33259e-34	NMDA receptor glutamate binding chain
Smp_131370	197.593	9.90847	0.788988	12.5585	3.57245e-36	5.33259e-34	hypothetical protein
Smp_163820	250.64	5.64253	0.450029	12.5381	4.61694e-36	6.72827e-34	phospholipid transporting ATPase IF
Smp_073450	225.323	3.69566	0.296527	12.4632	1.18591e-35	1.70123e-33	hypothetical protein
Smp_145300	1620.67	-3.79883	0.305677	-12.4276	1.85103e-35	2.6145e-33	peptidylglycine alpha hydroxylating mono-oxygenase
Smp_097500	359.704	4.21313	0.339105	12.4242	1.93041e-35	2.68532e-33	hypothetical protein
Smp_195190	222.045	9.49573	0.77443	12.2616	1.45648e-34	1.99581e-32	13 kDa tegumental antigen Sm13
Smp_089240	495.484	3.32888	0.273111	12.1887	3.56874e-34	4.81832e-32	alpha 1,6 mannosyl glycoprotein
Smp_000850	478.669	3.78801	0.311834	12.1475	5.91543e-34	7.87095e-32	cysteine string protein
Smp_086530	300.97	4.40871	0.363228	12.1376	6.67522e-34	8.63172e-32	tegument-allergen-like protein
Smp_157820	138.876	5.12278	0.422044	12.138	6.64241e-34	8.63172e-32	serine protein kinase ATM
Smp_075870	1632.2	2.91646	0.24146	12.0784	1.37294e-33	1.75069e-31	Translocation associated membrane protein 1
Smp_035700	406.874	3.84554	0.319416	12.0393	2.20793e-33	2.77685e-31	adenosine deaminase
Smp_099800	2070.58	4.77071	0.400373	11.9157	9.80727e-33	1.21676e-30	#N/A
Smp_131990	354.623	4.59114	0.386146	11.8897	1.3396e-32	1.63985e-30	Growth arrest specific protein 2 3
Smp_146970	588.823	4.28946	0.361372	11.8699	1.69656e-32	2.04948e-30	PCTP protein like
Smp_095520	288.738	3.89332	0.330909	11.7655	5.87571e-32	7.00583e-30	dynein light chain
Smp_063330	808.34	3.58703	0.307287	11.6732	1.74668e-31	2.05593e-29	hypothetical protein
Smp_089290	140.975	3.93755	0.337913	11.6526	2.2262e-31	2.58718e-29	alpha galactosidase:alpha n
Smp_049580	660.21	7.95635	0.684493	11.6237	3.1229e-31	3.58392e-29	zinc finger protein
Smp_194770	1079	-2.97352	0.257312	-11.5561	6.87645e-31	7.79416e-29	taurocyamine kinase
Smp_120180	251.963	3.07173	0.266984	11.5053	1.24107e-30	1.38954e-28	NAD dependent epimerase:dehydratase
Smp_155490	295.186	3.33058	0.290414	11.4684	1.9011e-30	2.10289e-28	#N/A
Smp_081430	104.055	4.85617	0.427249	11.3661	6.16721e-30	6.74062e-28	retinol dehydrogenase 11
Smp_146430	104.798	5.48613	0.484584	11.3213	1.02904e-29	1.11148e-27	beta 14 galactosyltransferase
Smp_198280	219.964	2.54386	0.226718	11.2204	3.23836e-29	3.45713e-27	#N/A
Smp_129050	236.291	2.65305	0.237208	11.1845	4.85687e-29	5.12539e-27	dynamin 1
Smp_081920	211.765	7.97365	0.714881	11.1538	6.86018e-29	7.1572e-27	hypothetical protein
Smp_059600	327.942	5.16824	0.465367	11.1057	1.17637e-28	1.21351e-26	tektin 3
Smp_014570	146.876	4.47819	0.403369	11.102	1.22686e-28	1.23779e-26	Saposin,IPR008139 Saposin
Smp_141500	218.347	8.91993	0.803424	11.1024	1.22141e-28	1.23779e-26	hypothetical protein
Smp_127200	436.168	4.86998	0.438896	11.096	1.31227e-28	1.29548e-26	solute carrier family 2 facilitated glucose
Smp_159490	138.722	9.21095	0.83008	11.0965	1.30521e-28	1.29548e-26	polypeptide GalNAc transferase 6
Smp_018760	2901.29	2.61145	0.237321	11.0039	3.65967e-28	3.57441e-26	neutral alpha glucosidase AB
Smp_158600	1603.71	2.51589	0.228842	10.994	4.08367e-28	3.94655e-26	dolichyl diphosphooligosaccharide protein
Smp_034120	1195.4	-3.61222	0.328666	-10.9906	4.24303e-28	4.05784e-26	synaptosomal associated protein 23 kDa
Smp_197530	69.528	8.08422	0.736419	10.9777	4.88984e-28	4.62821e-26	hypothetical protein
Smp_072990	339.078	-4.34136	0.395617	-10.9736	5.11672e-28	4.79353e-26	Transmembrane protein 185B
Smp_007950	106.535	8.9158	0.822379	10.8415	2.18924e-27	2.03024e-25	beta 1,4 galactosyltransferase 4
Smp_194180	93.3584	7.90733	0.729716	10.8362	2.31966e-27	2.12968e-25	hypothetical protein
Smp_053900	323.174	3.11575	0.287814	10.8255	2.60519e-27	2.36814e-25	beta hexosaminidase subunit beta
Smp_158440	373.455	4.23096	0.391896	10.7961	3.58942e-27	3.23083e-25	Transcription initiation factor TFIID subunit 3
Smp_114660	529.514	3.94655	0.36579	10.7891	3.87472e-27	3.45377e-25	hypothetical protein
Smp_165420	404.299	3.10413	0.287769	10.7869	3.97059e-27	3.50519e-25	zinc finger protein
Smp_187410	76.1661	7.65804	0.711502	10.7632	5.13489e-27	4.48985e-25	hypothetical protein
Smp_011680	1997.56	3.45658	0.321835	10.7402	6.58985e-27	5.70768e-25	CD36 class B scavenger receptor
Smp_081570	429.641	2.65633	0.247437	10.7354	6.9435e-27	5.95778e-25	staphylococcal nuclease domain containing protein
Smp_145810	235.736	3.5734	0.33528	10.6579	1.6009e-26	1.36091e-24	poly (adp ribose) polymerase 2
Smp_203500	166.728	-4.43762	0.416963	-10.6427	1.88556e-26	1.58819e-24	allatostatin receptor
Smp_155890	131.15	3.42291	0.32209	10.6272	2.22751e-26	1.85916e-24	alkaline phosphatase
Smp_137940	344.65	-3.57285	0.337459	-10.5875	3.40541e-26	2.81667e-24	guanylate kinase
Smp_137710	2820.64	3.23976	0.30619	10.5809	3.65481e-26	2.99597e-24	major facilitator superfamily domain containing protein
Smp_140510	818.604	3.15668	0.298442	10.5772	3.80057e-26	3.08788e-24	TLC domain containing protein 2
Smp_042740	366.341	-3.81492	0.361621	-10.5495	5.10614e-26	4.11224e-24	spag6
Smp_006730	128.745	5.50221	0.522029	10.54	5.64761e-26	4.50876e-24	DNA damage regulated autophagy modulator protein
Smp_153550	238.442	3.62563	0.34561	10.4905	9.5511e-26	7.55937e-24	hypothetical protein
Smp_054330	280.431	-3.18108	0.303574	-10.4788	1.0813e-25	8.48494e-24	cyclophilin
Smp_084600	574.161	2.46403	0.235379	10.4684	1.20704e-25	9.3914e-24	solute carrier family 37
Smp_050520	126.55	4.29616	0.411515	10.4399	1.63055e-25	1.25799e-23	neurogenic locus notch protein
Smp_123110	143.793	6.60345	0.635772	10.3865	2.85608e-25	2.18514e-23	hypothetical protein
Smp_091870	502.764	4.84809	0.468183	10.3551	3.96731e-25	3.01024e-23	hypothetical protein
Smp_095360	4000.55	4.03978	0.390167	10.354	4.01432e-25	3.02094e-23	14 kDa fatty acid-binding protein
Smp_145910	54.0184	7.41305	0.716832	10.3414	4.57782e-25	3.41699e-23	protein tyrosine sulfotransferase
Smp_194050	3106.25	4.5542	0.440428	10.3404	4.62556e-25	3.42478e-23	Clumping factor A
Smp_169510	64.7723	6.74025	0.652642	10.3276	5.28452e-25	3.88137e-23	PI3kinase
Smp_169200	111.779	4.67981	0.453375	10.3221	5.5957e-25	4.07731e-23	tegument-allergen-like protein
Smp_176190	116.101	3.16671	0.308018	10.2809	8.59036e-25	6.21009e-23	#N/A
Smp_035300	1072.2	3.7057	0.360851	10.2693	9.68723e-25	6.94832e-23	snare protein sec22
Smp_011270	464.091	2.57201	0.251008	10.2467	1.22444e-24	8.71439e-23	sj ts4 protein
Smp_141490	156.911	6.90547	0.674852	10.2326	1.41702e-24	1.00074e-22	hypothetical protein
Smp_150380	169.739	6.04764	0.591824	10.2186	1.63625e-24	1.14675e-22	sphingomyelin synthase 1
Smp_024820	956.163	-3.03527	0.297134	-10.2152	1.69605e-24	1.17965e-22	tetraspanin family protein 16 invertebrate
Smp_028490	273.777	6.24169	0.611543	10.2065	1.85524e-24	1.28067e-22	1 acyl sn glycerol 3 phosphate acyltransferase
Smp_077980	2346.14	-4.04723	0.397162	-10.1904	2.18879e-24	1.49965e-22	neuroendocrine convertase 2
Smp_139530	258.725	7.50571	0.738649	10.1614	2.94816e-24	2.00497e-22	tumor protein p73
Smp_004190	1669.08	-3.38861	0.334855	-10.1197	4.52013e-24	3.05142e-22	cationic amino acid transporter 4
Smp_194860	1067.62	3.80893	0.37828	10.0691	7.56843e-24	5.07195e-22	hypothetical protein
Smp_059670	1415.48	-3.90239	0.387595	-10.0682	7.63566e-24	5.07993e-22	synaptogyrin 2
Smp_037780	394.573	2.51628	0.251388	10.0096	1.3838e-23	9.14002e-22	hypothetical protein
Smp_194910	99.237	3.62671	0.362423	10.0069	1.42204e-23	9.32551e-22	Saposin B domain containing protein
Smp_024370	1958.03	-3.08907	0.308765	-10.0046	1.45489e-23	9.47331e-22	hypothetical protein
Smp_134550	2916.8	-4.18193	0.418147	-10.0011	1.50728e-23	9.74531e-22	hypothetical protein
Smp_022450	104.958	5.58275	0.55926	9.98238	1.82049e-23	1.16881e-21	hypothetical protein
Smp_003230	219.112	4.1304	0.414636	9.96151	2.24629e-23	1.43217e-21	SH3 domain GRB2 endophilin B1
Smp_161030	281.911	3.63164	0.364716	9.95745	2.33996e-23	1.4816e-21	hypothetical protein
Smp_154490	41.9668	4.57343	0.459538	9.95225	2.46553e-23	1.55041e-21	ras associating and dilute domain containing protein
Smp_205110	205.812	-4.13935	0.416027	-9.94971	2.52911e-23	1.57958e-21	p2X purinoceptor 4
[truncated: 10,684 more rows]
