# Supplementary material for: Flatworm-specific transcriptional regulators promote the specification of tegumental progenitors in Schistosoma mansoni
Source: eLife. 2018 Mar 20;7:e33221. doi: 10.7554/eLife.33221 (PMC5927768; doi:10.7554/eLife.33221)
Supplement: Supplementary file 2. [file elife-33221-supp2.xlsx]

## Sheet: All Data
Gene ID	WB Parasite Annotation	MB_Cluster IR Rest FC	MB_Cluster Neo FC	MB_Cluster TSP-2 high FC	Cluster Number	DEseq2 Neo vs. IR Rest Log2FC	DEseq2 Neo vs. IR Rest adjP	DEseq2 TSP-2 vs. neo IR Rest t Log2FC	DEseq2 TSP-2 vs. neo adjP	Deseq2 TSP-2 vs IR Rest Log2FC	Deseq2TSP-2 vs IR Rest adjP	RPKM IR	RPKM Neo	RPKM TSP-2 HI
Smp_166860	hypothetical protein	-5.63546	-0.693819	6.32928	3	2.52997	0.0107927	9.71553	8.87067e-61	12.2455	1.08804e-48	0	9.17912	10497
Smp_160930	hypothetical protein	-3.10177	-3.10177	6.20355	3	0	NA	9.45059	NA	9.47476	NA	0	0	157.518
Smp_122630	MEG 1	-4.22805	-1.39449	5.62254	3	2.44975	0.00614857	9.84364	2.41294e-83	12.2934	3.72174e-60	0.257202	3.95427	4312.16
Smp_206030	retinal specific ATP binding cassette	-1.55047	-3.90986	5.46033	3	-0.492327	0.787416	9.28843	1.26943e-20	8.79611	1.10616e-20	0.0624255	0	92.3059
Smp_176450	ATP binding cassette sub family A	-3.44051	-1.88788	5.32839	3	1.11097	0.356066	9.88184	7.22901e-49	10.9928	1.46422e-42	0.0209454	0.116353	160.673
Smp_156930	hypothetical protein	-3.57686	-1.55423	5.1311	3	1.62286	0.123181	9.2856	1.44867e-56	10.9085	3.10099e-44	0.558544	4.74386	3817.11
Smp_146710	hypothetical protein	-3.6759	-1.37331	5.04921	3	0.639354	0.721607	7.85375	9.09031e-17	8.4931	4.82039e-17	0	0.117924	67.3898
Smp_131370	hypothetical protein	-2.8386	-2.20226	5.04086	3	0.416154	0.794141	9.49231	7.96963e-36	9.90847	5.33259e-34	0.150175	0.316811	464.115
Smp_154670	glycosyltransferase 14 family member	-0.562887	-4.30857	4.87146	3	-1.36546	0.304258	8.70407	1.8004e-20	7.3386	3.0364e-21	0.386541	0	92.4624
Smp_148080	hypothetical protein	-2.89128	-1.84947	4.74075	3	1.33582	0.0582512	9.32125	1.09748e-96	10.6571	4.32705e-86	1.34389	3.93602	2827.07
Smp_035290	hypothetical protein	-2.45751	-1.9547	4.41221	3	0.61289	0.582981	8.89421	7.7591e-55	9.5071	1.54394e-49	0.634198	0.994569	574.599
Smp_212790	histone deacetylase, putative	-2.63401	-1.77453	4.40854	3	0.973872	0.324926	8.5662	5.35365e-51	9.54008	2.39361e-46	0.316557	0.676307	309.408
Smp_181530	tsp-2	-3.66674	-0.727819	4.39456	3	3.37086	5.62796e-06	7.21831	2.586e-49	10.5892	2.47406e-54	1.61614	28.754	4818.46
Smp_069120	synaptotagmin 2	-5.07476	0.754182	4.32058	3	3.74144	0.000420336	4.57688	1.06028e-08	8.31832	4.49029e-17	0	2.77566	87.442
Smp_147670	Receptor kinase I-interacting protein SIP	-2.00837	-2.21933	4.2277	3	-0.141057	0.886912	9.01437	1.04359e-84	8.87331	2.33904e-88	0.602355	0.490139	294.91
Smp_145920	protein tyrosine sulfotransferase	-2.97423	-1.23928	4.21351	3	1.70072	0.0787811	7.52022	4.64082e-37	9.22094	3.37301e-34	0.450826	2.29876	518.082
Smp_158890	MEG 16	-1.67859	-2.53033	4.20893	3	-0.936234	0.191956	9.39997	2.22677e-70	8.46373	8.84736e-70	13.2503	5.97609	5021.52
Smp_166890	ATPase	-4.54126	0.400385	4.14087	3	2.78606	0.0100111	5.23052	3.77171e-14	8.01658	2.61281e-17	0	0.879228	38.8538
Smp_159490	polypeptide GalNAc transferase 6	-3.55208	-0.564366	4.11645	3	2.80615	0.00420478	6.4048	3.91197e-23	9.21095	1.29548e-26	0.0761358	1.326	141.971
Smp_140540	hypothetical protein	-1.77168	-2.2985	4.07018	3	-0.346497	NA	7.53956	NA	7.19306	NA	1.66259	1.0654	620.682
Smp_132740	fatty acid desaturase 2	-2.04643	-2.00793	4.05436	3	0.191599	0.824825	8.47134	4.59768e-64	8.66294	3.51114e-66	4.34001	4.48738	1947.55
Smp_194180	hypothetical protein	-1.99722	-2.05403	4.05126	3	0.0495133	0.980284	7.85781	2.37389e-25	7.90733	2.12968e-25	0.485899	0.460071	224.962
Smp_195190	13 kDa tegumental antigen Sm13	-4.08091	0.036673	4.04423	3	4.08769	1.61204e-06	5.40804	9.19342e-22	9.49573	1.99581e-32	0.303209	21.1092	1004.34
Smp_127710	hypothetical protein	-2.38631	-1.64461	4.03092	3	0.930185	0.31026	7.72908	4.66308e-36	8.65926	5.87186e-39	0.909344	1.71189	479.138
Smp_007950	beta 1,4 galactosyltransferase 4	-3.32894	-0.677694	4.00663	3	2.444	0.0151474	6.4718	1.10015e-24	8.9158	2.03024e-25	0.190641	2.96693	328.724
Smp_035550	hypothetical protein	0.631543	-4.61822	3.98668	14	-3.34922	0.00192095	8.22757	1.39676e-17	4.87835	1.65509e-15	4.00541	0	118.982
Smp_151440	hypothetical protein	-0.55755	-3.41772	3.97527	14	-3.26672	4.07405e-06	9.92843	8.17264e-53	6.6617	9.38415e-51	17.3914	1.09853	1769.46
Smp_136650	#N/A	0.813727	-4.76454	3.95081	14	-3.55257	0.000373883	8.09087	4.95576e-19	4.53831	1.31074e-16	3.34874	0	76.8363
Smp_195180	antigenic integral membrane glycoprotein	-3.85361	-0.0656065	3.91922	3	4.59836	5.05201e-10	5.33024	1.38067e-20	9.9286	1.29526e-44	0.754072	34.7849	1591.82
Smp_188780	hypothetical protein	-1.61872	-2.26332	3.88204	3	-0.565066	0.590439	8.36019	3.25494e-42	7.79512	5.71942e-46	2.79868	1.54791	703.167
Smp_136470	pleckstrin y domain containing family G	-1.90672	-1.96353	3.87024	3	0.0518734	0.979813	7.49007	2.1992e-21	7.54194	2.07024e-21	0.0618194	0.066988	22.4636
Smp_141500	hypothetical protein	-3.97879	0.123285	3.8555	3	4.01694	5.7155e-06	4.90298	1.53857e-14	8.91993	1.23779e-26	0.260959	17.7304	627.457
Smp_163710	MEG 6	-1.96084	-1.82137	3.78222	3	0.297864	0.700036	7.88104	4.86375e-58	8.1789	1.65083e-61	44.6419	51.9782	14154.8
Smp_049580	zinc finger protein	-2.22548	-1.52852	3.754	3	0.920863	0.322504	7.03548	3.5174e-24	7.95635	3.58392e-29	0.914779	1.7894	327.053
Smp_169460	RAB18, member RAS oncogene family	-1.72375	-2.02172	3.74547	3	-0.235627	0.816087	8.00962	9.14188e-53	7.774	3.45581e-54	2.51032	1.88422	578.393
Smp_187410	hypothetical protein	-2.17366	-1.53732	3.71099	3	0.595761	0.649924	7.06228	7.28819e-27	7.65804	4.48985e-25	0.297403	0.606088	109.082
Smp_164170	endoglycoceramidase	-1.6327	-2.00459	3.63729	3	-0.378205	0.638667	7.77978	2.25381e-53	7.40158	3.96018e-51	3.82282	2.69065	678.964
Smp_197730	rrm containing protein seb 4	-3.59181	0.00636336	3.58544	3	4.39412	2.08209e-11	5.11661	8.26745e-56	9.51073	1.39032e-52	0.260798	9.8879	341.58
Smp_145910	protein tyrosine sulfotransferase	-1.90769	-1.67681	3.5845	3	0.315438	0.830142	7.09761	1.43375e-23	7.41305	3.41699e-23	0.495198	0.638116	125.565
Smp_135530	leishmanolysin peptidase	-1.69412	-1.84157	3.53569	3	-0.0635844	0.918128	7.70265	1.38659e-108	7.63906	3.06972e-107	13.2485	11.9359	2546.03
Smp_187070	hypothetical protein	-1.69157	-1.82248	3.51405	3	-0.0373647	0.975599	7.41482	4.09233e-53	7.37746	6.60267e-54	1.94335	1.74438	342.645
Smp_040680	dynein light chain	-0.318397	-3.14182	3.46022	14	-3.69267	4.35896e-14	9.27769	5.45167e-88	5.58501	9.7469e-47	126.916	7.84701	5850.6
Smp_163820	phospholipid transporting ATPase IF	-0.468253	-2.9486	3.41685	14	-3.04202	5.13356e-06	8.68455	1.1815e-45	5.64253	6.72827e-34	2.13846	0.181933	103.475
Smp_141490	hypothetical protein	-1.83858	-1.53872	3.3773	3	0.465412	0.689637	6.44006	7.69761e-22	6.90547	1.00074e-22	1.14052	1.66923	192.683
Smp_176940	cationic amino acid transporter	-0.667935	-2.68732	3.35526	14	-2.67567	4.24931e-10	8.5599	1.49793e-101	5.88423	2.94196e-66	12.1195	1.67611	676.338
Smp_135980	Calcium binding protein	-2.09588	-1.2364	3.33229	3	0.852442	0.496393	6.12302	1.15288e-19	6.97546	8.42922e-19	0.458347	1.05197	95.5683
Smp_053640	hypothetical protein	-1.96104	-1.34464	3.30568	3	0.999783	0.0135149	6.69525	4.81231e-97	7.69504	3.80351e-114	5.51815	10.7561	1104.92
Smp_200180	dynein light chain	-1.3175	-1.94142	3.25892	14	-0.77308	0.183799	7.32233	3.48231e-61	6.54925	2.34812e-54	26.7573	14.3858	2478.01
Smp_081920	hypothetical protein	-2.95476	-0.29247	3.24723	3	3.34801	2.33239e-05	4.62564	8.76e-13	7.97365	7.1572e-27	1.54947	24.6057	710.521
Smp_120050	endoglycoceramidase	-0.426223	-2.78562	3.21184	14	-1.90018	0.0734046	7.07088	6.96456e-17	5.1707	1.97236e-16	1.36542	0.137631	52.5482
Smp_022450	hypothetical protein	-0.903727	-2.28229	3.18602	14	-1.44822	0.11062	7.03097	1.93377e-23	5.58275	1.16881e-21	5.07236	1.23131	252.394
Smp_123110	hypothetical protein	-1.68728	-1.48173	3.16901	3	0.402182	0.717215	6.20127	1.97877e-22	6.60345	2.18514e-23	0.89643	1.20433	108.62
Smp_163720	endophilin B1	-0.805876	-2.31664	3.12251	14	-1.98016	1.37151e-08	7.76521	1.87664e-132	5.78505	6.7468e-103	31.7316	7.2021	1604.38
Smp_197530	hypothetical protein	-3.2135	0.147415	3.06609	5	3.995	8.50054e-07	4.08922	3.01016e-18	8.08422	4.62821e-26	2.37923	71.4878	1235.43
Smp_013310	hypothetical protein	-1.48777	-1.54458	3.03234	3	0.0606479	0.971082	6.10382	1.34228e-18	6.16446	1.3093e-18	2.25906	2.3298	204.574
Smp_170960	serine rich repeat protein	0.0242605	-3.05645	3.03219	14	-3.48112	0.000137325	7.53831	1.60402e-18	4.05719	1.28002e-06	6.54815	0.320398	128.668
Smp_059600	tektin 3	-0.604753	-2.42106	3.02581	14	-2.30402	8.74873e-05	7.47227	2.80046e-44	5.16824	1.21351e-26	17.6844	2.93022	639.788
Smp_187010	hypothetical protein	-1.62672	-1.36987	2.99659	3	0.409318	0.58884	6.14351	3.24431e-44	6.55283	1.32671e-45	3.08185	3.86433	289.035
Smp_148100	hypothetical protein	-0.924858	-2.06159	2.98644	14	-1.28007	0.303245	6.135	6.78955e-10	4.85492	1.57814e-06	10.4602	3.20118	489.105
Smp_104210	RHO G-protein coupled receptor	-1.34215	-1.58128	2.92342	14	-0.12044	0.939186	5.92317	1.23279e-13	5.80273	2.5577e-13	0.64022	0.553139	46.6754
Smp_203380	hypothetical protein	-2.12987	-0.785788	2.91566	3	1.90705	0.00237606	5.35556	8.19663e-28	7.2626	1.5994e-39	4.61526	18.3863	793.136
Smp_003610	DM9 domain containing protein	-1.46509	-1.42012	2.88521	3	0.190903	0.872718	5.81324	1.18884e-17	6.00414	2.54155e-18	6.168	6.52486	488.066
Smp_194980	25 kDa integral membrane protein	-1.29772	-1.56482	2.86254	14	-0.241315	0.743952	6.19048	2.72411e-44	5.94917	3.62139e-42	10.3845	8.25502	641.752
Smp_091870	hypothetical protein	-0.462186	-2.38137	2.84356	14	-2.47644	6.91263e-06	7.32452	3.1028e-46	4.84809	3.01024e-23	10.6269	1.62967	300.495
Smp_101970	Placenta specificprotein 8 protein (C15 protein)	-2.42595	-0.414092	2.84004	3	2.86476	2.73101e-07	4.3904	7.92127e-19	7.25516	4.16582e-43	10.4922	81.6561	1833.09
Smp_181470	NMDA receptor glutamate binding chain	-1.10525	-1.6909	2.79615	14	-0.662425	0.320002	6.33819	5.88254e-39	5.67576	5.33259e-34	6.43814	3.65576	322.394
Smp_195040	plastin 2	-1.06348	-1.56422	2.6277	14	-0.596143	0.275866	5.92918	8.17264e-53	5.33304	5.35653e-49	15.2659	9.289	573.249
Smp_176650	hypothetical protein	-0.146498	-2.46885	2.61535	14	-3.08556	1.80254e-09	7.06686	2.78735e-47	3.9813	1.22835e-17	62.779	6.31128	959.495
Smp_037230	fimbrin	-1.21394	-1.39622	2.61016	5	-0.186324	0.773847	5.58594	1.49205e-44	5.39962	7.57385e-42	14.9557	12.5079	615.947
Smp_212420	SH3 domain containing kinase binding protein 1	-0.062027	-2.54432	2.60635	14	-2.99159	0.000315384	6.65433	1.06376e-17	3.66274	1.65102e-06	22.3555	1.97548	308.863
Smp_093160	STARP antigen	-0.278929	-2.31939	2.59832	14	-2.61688	1.42704e-05	6.76886	2.2968e-33	4.15198	4.29945e-15	18.3952	2.52246	325.946
Smp_045200	tegument-allergen-like protein	-0.888086	-1.7095	2.59759	14	-1.02049	0.0432353	6.0815	3.40438e-52	5.06102	3.32982e-46	10.9614	4.80773	339.308
Smp_136660	pro neuregulin 2	-0.104735	-2.46413	2.56886	14	-2.70269	0.00114772	6.46303	2.35015e-17	3.76034	8.95267e-08	7.06428	0.694827	100.962
Smp_134210	peptidase inhibitor 16	-1.21062	-1.33643	2.54705	5	-0.0773271	0.951254	5.12295	9.68345e-14	5.04563	3.23479e-13	1.25299	1.146	47.7328
Smp_172250	inositol 5 phosphatase	-0.114624	-2.42501	2.53963	14	-2.9343	2.47386e-05	6.6056	7.05239e-24	3.67131	9.70119e-09	7.69317	0.767661	101.191
Smp_197860	gelsolin	-1.40347	-1.11197	2.51544	5	0.513291	0.59252	4.97289	6.84022e-18	5.48618	2.55989e-19	1.13688	1.70996	58.5403
Smp_081430	retinol dehydrogenase 11	-0.877098	-1.62705	2.50415	14	-0.868897	0.192995	5.72506	3.72203e-31	4.85617	6.74062e-28	4.37492	2.14387	122.606
Smp_144960	FTS and Hook interacting protein	-1.465	-1.03558	2.50058	5	0.777564	0.152113	5.03706	7.54749e-32	5.81462	1.88871e-40	2.38775	3.97533	133.402
Smp_129350	ras and EF hand domain containing protein	-0.481623	-1.98535	2.46697	14	-1.91625	3.98468e-05	6.21228	2.30757e-50	4.29603	2.08366e-35	8.25779	1.91714	150.441
Smp_081190	GTP binding protein rhoA	-0.684796	-1.77122	2.45602	14	-1.25744	0.082891	5.77715	7.05239e-24	4.51971	6.07724e-20	3.98384	1.43765	90.2757
Smp_174510	dynein light chain	-0.708486	-1.74612	2.45461	5	-1.17314	0.262526	5.2715	8.49163e-11	4.09837	9.43249e-08	5.84909	1.97882	113.692
Smp_169200	tegument-allergen-like protein	-0.876404	-1.57757	2.45397	5	-0.822207	0.222962	5.50201	1.43108e-27	4.67981	4.07731e-23	7.89568	3.96495	195.193
Smp_211310	soluble guanylate cyclase gcy	0.167617	-2.58043	2.41282	14	-3.26229	0.000146104	6.46686	8.07851e-16	3.20457	3.35082e-06	2.36692	0.145219	22.2805
Smp_125810	zinc finger protein 112	-3.7387	1.32713	2.41157	13	7.0288	1.3269e-44	1.56431	7.05634e-07	8.5931	1.36099e-66	1.75309	307.33	863.11
Smp_137370	cyclin dependent kinase 16	0.521499	-2.92814	2.40664	14	-4.26414	6.39798e-09	7.00959	5.22314e-23	2.74545	2.50625e-05	11.1003	0.351099	73.1814
Smp_169510	PI3kinase	-2.46503	0.0684251	2.39661	5	3.33866	3.64189e-06	3.4016	2.03489e-10	6.74025	3.88137e-23	0.228495	3.29836	35.3437
Smp_134130	ring canal kelch	-0.344248	-2.04328	2.38753	5	-1.9433	0.020036	5.84918	4.86453e-16	3.90588	3.66433e-10	2.13241	0.432235	32.7617
Smp_093780	peroxiredoxins, prx 1, prx 2, prx 3	-0.0557645	-2.32555	2.38131	14	-2.92741	1.10348e-07	6.64238	6.88831e-38	3.71498	1.18843e-18	57.6413	5.98922	707.985
Smp_045360	calsyntenin 2	-0.164777	-2.21309	2.37787	14	-2.72483	1.60757e-08	6.44281	1.31412e-44	3.71798	3.18857e-16	20.537	2.72654	258.283
Smp_194050	Clumping factor A	-0.938659	-1.40538	2.34404	5	-0.604793	0.30075	5.159	1.065e-29	4.5542	3.42478e-23	71.4252	44.2498	1666.19
Smp_156960	nardilysin (M16 family)	-0.715782	-1.61092	2.3267	5	-1.13015	0.224959	5.09296	8.53727e-12	3.96281	6.38394e-08	1.65045	0.662052	28.2054
Smp_020070	hypothetical protein	-0.756416	-1.567	2.32341	5	-0.928316	0.359002	4.89702	2.95914e-10	3.96871	2.65803e-07	1.45014	0.666971	26.2984
Smp_097500	hypothetical protein	-0.59754	-1.72109	2.31862	5	-1.45381	0.0003632	5.66693	1.20973e-53	4.21313	2.68532e-33	17.9688	5.95286	309.805
Smp_099800	#N/A	-0.846882	-1.46787	2.31476	5	-0.749886	0.133704	5.5206	7.59362e-41	4.77071	1.21676e-30	17.6856	9.8748	461.184
Smp_146970	PCTP protein like	-0.609535	-1.7045	2.31403	5	-1.39985	0.000971595	5.68931	5.90499e-50	4.28946	2.04948e-30	76.8816	26.6436	1412.9
Smp_176890	hypothetical protein	-1.03253	-1.27166	2.30419	5	-0.134139	0.924926	5.03176	3.16603e-10	4.89762	1.13047e-09	16.4479	13.9836	606.255
Smp_171860	hypothetical protein	-0.965533	-1.33776	2.30329	5	-0.388961	0.380545	5.16897	3.21342e-56	4.78001	5.35653e-49	23.3463	16.6491	592.388
Smp_190970	phosphatidylcholine transfer protein	-0.759507	-1.5428	2.30231	5	-0.943919	0.0399543	5.4618	6.46637e-47	4.51788	5.77271e-36	26.5134	12.4316	568.658
Smp_188150	hypothetical protein	-0.346538	-1.92317	2.26971	5	-1.90549	0.00357726	5.73992	1.11488e-22	3.83443	3.25259e-12	49.3828	10.8878	690.622
Smp_179490	hypothetical protein	-0.382489	-1.88622	2.26871	5	-1.76698	0.0293622	5.52982	1.92072e-15	3.76284	1.62811e-09	2.14276	0.463334	29.5405
Smp_140330	epsin 4:enthoprotin	-1.36943	-0.890361	2.2598	5	0.81827	0.0330388	4.46623	2.928e-46	5.2845	2.41539e-60	8.07511	13.4692	290.929
Smp_144310	potassium voltage gated channel subfamily KQT	0.676408	-2.92618	2.24977	2	-4.28116	1.89177e-07	6.73806	2.10912e-17	2.4569	0.00115714	8.64642	0.246157	46.9158
Smp_140590	hypothetical protein	0.268984	-2.51785	2.24887	5	-3.09498	0.00106199	5.69622	1.1892e-10	2.60124	0.00110947	1.51334	0.0925198	9.51913
Smp_142290	hyperpolarization activated cyclic	-0.444246	-1.80034	2.24458	5	-1.52317	0.0829076	5.36798	6.70372e-13	3.8448	1.4479e-07	2.72693	0.736757	42.4184
Smp_154490	ras associating and dilute domain containing protein	-0.912218	-1.33193	2.24415	5	-0.445063	0.584439	5.01849	5.10388e-23	4.57343	1.55041e-21	0.514194	0.341906	11.7956
Smp_201060	dynein light chain	-0.824216	-1.41817	2.24238	5	-0.743452	0.0808951	5.1424	9.88462e-49	4.39895	1.911e-37	92.7063	51.0036	1819.44
Smp_213430	hypothetical protein	-1.2158	-1.0213	2.2371	5	0.348409	0.799257	4.21048	7.05634e-07	4.55889	1.3094e-07	1.09692	1.4656	34.1317
Smp_105410	glucose transport protein	-0.58904	-1.6391	2.22814	5	-1.27307	0.0282447	5.29885	3.95735e-28	4.02578	9.50535e-21	3.759	1.33977	57.6817
Smp_089670	alpha 2 macroglobulin	-0.751407	-1.47604	2.22745	5	-0.779062	0.24362	5.08729	6.58393e-23	4.30823	1.32942e-17	1.30423	0.675559	25.2097
Smp_018170	zinc finger protein	-1.46522	-0.739079	2.2043	5	1.16474	0.0125901	4.11688	2.75556e-24	5.28162	1.06975e-37	10.0861	21.7932	376.199
Smp_176610	BTB:POZ domain containing protein	-0.538002	-1.65514	2.19314	5	-1.36608	0.0345604	5.21705	2.38131e-20	3.85097	9.45741e-12	5.84242	2.04261	84.7943
Smp_153390	Nucleotide pyrophosphatase:phosphodiesterase 5	-0.293881	-1.89825	2.19213	5	-2.05006	0.000196477	5.67885	4.76988e-30	3.62879	1.50973e-16	7.15935	1.44508	82.8774
Smp_163490	#N/A	0.221388	-2.4113	2.18991	5	-2.86807	0.00374519	5.57885	1.53704e-09	2.71078	0.00402811	5.30202	0.420153	38.3143
Smp_171720	lipid phosphate phosphohydrolase 1	-1.88434	-0.304146	2.18849	5	2.3656	3.05447e-17	3.61513	1.31158e-44	5.98073	2.60858e-109	29.1799	145.244	1703.19
Smp_173610	hypothetical protein	0.380199	-2.55768	2.17748	2	-3.66171	1.38943e-08	6.3981	2.36004e-25	2.73638	2.23909e-10	68.8702	3.93013	419.494
Smp_081900	hypothetical protein	0.0917104	-2.26373	2.17202	14	-3.18185	3.67603e-17	6.35351	3.88379e-67	3.17166	1.49662e-18	410.849	40.4649	3356.92
Smp_127200	solute carrier family 2 facilitated glucose	-1.18956	-0.981332	2.1709	5	0.48888	0.426097	4.3811	3.45938e-22	4.86998	1.29548e-26	17.2458	22.5811	484.335
Smp_213750	putative sugar transporter	-1.23219	-0.936175	2.16836	5	0.57402	0.181	4.44742	6.00555e-41	5.02144	6.64507e-50	11.8655	16.623	358.386
Smp_143930	SH3 and multiple ankyrin repeat domains protein	-0.176237	-1.9909	2.16714	5	-2.18946	0.00215657	5.61583	1.99247e-18	3.42638	1.15577e-09	2.82054	0.479739	29.3808
Smp_166340	hypothetical protein	-0.408521	-1.75731	2.16583	5	-1.7566	0.000832752	5.49397	1.15481e-30	3.73737	4.62134e-16	51.5635	13.9677	663.872
Smp_002150	trypsin-like serine protease	-0.766385	-1.38741	2.15379	5	-0.781806	0.0518539	4.96393	9.16703e-49	4.18212	5.12319e-36	23.3705	12.5757	395.475
Smp_075370	hypothetical protein	-0.773018	-1.38066	2.15368	5	-0.692253	0.315716	4.87049	1.49609e-20	4.17824	7.16416e-16	7.88331	4.52858	141.599
Smp_146430	beta 14 galactosyltransferase	-1.74413	-0.402219	2.14635	5	1.97182	0.00039966	3.51431	9.13248e-16	5.48613	1.11148e-27	2.88049	11.4806	133.651
Smp_150380	sphingomyelin synthase 1	-2.07486	-0.0643928	2.13925	5	2.90189	7.47957e-06	3.14574	1.28473e-07	6.04764	1.14675e-22	2.34875	19.6961	180.957
Smp_086480	tegument-allergen-like protein	-0.950254	-1.18665	2.1369	5	-0.246976	0.770605	4.47822	1.46184e-17	4.23124	8.77734e-16	14.3446	11.1279	269.554
Smp_131580	lysosomal alpha mannosidase	-0.617297	-1.51894	2.13623	5	-1.09497	0.1646	4.83511	1.19508e-13	3.74014	1.32116e-08	4.98701	2.05333	69.859
Smp_155900	alkaline phosphatase	-0.418893	-1.71246	2.13136	5	-1.55683	0.072565	5.19733	1.09227e-12	3.6405	8.39999e-08	7.83105	2.08409	101.208
Smp_203090	hypothetical protein	-0.469448	-1.65766	2.12711	5	-1.30294	0.169287	4.90134	2.53463e-10	3.5984	1.47749e-06	14.9341	4.66465	194.963
Smp_176300	dynein heavy chain	-0.00995582	-2.11276	2.12271	5	-2.73504	3.41978e-07	5.96858	1.97469e-32	3.23354	6.9143e-14	1.10522	0.145269	9.74832
Smp_028870	Zinc finger, C2H2 type domain containing protein	-0.893216	-1.22196	2.11517	5	-0.29001	0.785511	4.44231	2.76898e-12	4.1523	3.96909e-11	3.79277	2.77379	70.3304
Smp_125200	Aquaporin 9 (AQP 9) (Small solute channel 1)	2.67563	-4.78971	2.11408	15	-5.72831	1.75643e-08	4.88329	2.8453e-06	-0.845022	0.41923	30.7387	0	13.9699
Smp_050520	neurogenic locus notch protein	-0.918667	-1.18483	2.10349	5	-0.249692	0.715856	4.54585	5.57001e-26	4.29616	1.25799e-23	6.31318	4.91239	117.837
Smp_160880	phosphatidylcholine sterol acyltransferase	-0.859142	-1.24137	2.10051	5	-0.461017	0.631956	4.49466	3.8758e-12	4.03364	4.01131e-10	4.65883	3.05474	79.2762
Smp_126000	hypothetical protein	0.239134	-2.33537	2.09624	5	-2.91005	0.00296281	5.81032	1.72988e-10	2.90026	0.00106927	3.69096	0.283078	30.2721
Smp_158510	diacylglycerol O-acyltransferase 1	-1.23228	-0.856227	2.08851	5	0.651348	0.440874	3.95095	2.32401e-11	4.60229	6.26523e-14	2.64682	4.17331	68.1792
Smp_156630	hypothetical protein	-0.0391706	-2.04664	2.08581	5	-2.56358	5.8687e-05	5.54459	3.79717e-20	2.98102	1.55965e-06	24.1311	3.50236	186.611
Smp_086530	tegument-allergen-like protein	-0.989302	-1.09326	2.08256	5	-0.0382281	0.957345	4.44694	2.09277e-32	4.40871	8.63172e-32	29.8246	26.9406	594.725
Smp_165520	Protein C6orf152	-0.0580706	-2.02442	2.08249	5	-2.36299	0.00622297	5.68735	3.4707e-13	3.32436	5.05326e-06	4.05946	0.599743	42.3146
Smp_146720	tissue type plasminogen activator	-0.676798	-1.40548	2.08227	5	-0.875887	0.225888	4.86127	7.33572e-17	3.98538	1.1837e-11	3.03181	1.51383	47.6931
Smp_099770	tetraspanin	-0.664988	-1.41494	2.07993	5	-0.864472	0.349536	4.541	7.43735e-11	3.67653	5.49207e-08	4.17332	1.99949	56.2486
Smp_129010	hypothetical protein	-3.51791	1.44586	2.07205	13	6.91707	4.3649e-49	0.933118	0.0065362	7.85018	3.1713e-63	1.62184	241.979	438.65
Smp_099810	telomerase protein component	-0.920878	-1.13895	2.05983	5	-0.181411	0.761998	4.53868	5.02421e-37	4.35727	6.86518e-35	13.1531	10.9749	249.625
Smp_102210	#N/A	-0.335823	-1.70993	2.04576	5	-1.70561	0.0370812	5.00511	2.65467e-12	3.2995	1.92779e-06	23.554	5.7463	237.904
Smp_123270	Sj Ts1	-0.647866	-1.3959	2.04376	5	-0.916424	0.0600215	4.84536	2.58834e-31	3.92893	4.96413e-21	222.134	107.622	3182.08
Smp_132280	complement component C8 beta	-0.881721	-1.1521	2.03382	5	-0.27454	0.842779	3.97096	4.50762e-06	3.69642	2.29195e-05	1.97114	1.44481	30.8019
Smp_085410	Transmembrane protein 45B	0.536189	-2.56765	2.03146	2	-4.16233	2.21528e-18	6.43226	8.41102e-44	2.26993	2.60176e-09	41.7909	1.92909	183.792
Smp_054350	Forkhead box protein D3	-0.206903	-1.81908	2.02598	5	-2.03666	0.00813569	5.15799	1.32906e-13	3.12132	4.90191e-06	4.85823	0.973267	42.7676
Smp_187900	hypothetical protein	-0.0173304	-2.00203	2.01936	5	-2.41437	0.000714331	5.31139	3.66023e-16	2.89702	1.69223e-07	18.5914	2.7126	132.913
Smp_194800	ATP dependent RNA helicase Ddx1	-0.147103	-1.86892	2.01602	5	-2.1098	0.00702426	5.14627	3.90022e-13	3.03647	8.41747e-06	4.13592	0.788127	33.7653
Smp_191500	potassium channel, KvQLT family member (kqt 1)	0.472315	-2.48408	2.01177	2	-3.52791	2.4599e-05	6.01084	4.7074e-14	2.48292	0.000867996	20.3184	1.12091	111.955
Smp_073450	hypothetical protein	-0.524857	-1.48678	2.01164	5	-1.24649	0.000852005	4.94216	6.26586e-51	3.69566	1.70123e-33	1.70176	0.669175	20.0174
Smp_123650	peroxidasin	-0.297661	-1.70901	2.00668	5	-1.62045	0.0746712	4.72283	1.28284e-09	3.10238	2.42372e-05	1.72629	0.449266	15.5208
Smp_003230	SH3 domain GRB2 endophilin B1	-0.902711	-1.10331	2.00602	5	-0.136036	0.854504	4.26644	5.92679e-23	4.1304	1.43217e-21	15.8935	13.2323	262.428
Smp_114660	hypothetical protein	-0.739943	-1.26258	2.00252	5	-0.624929	0.184467	4.57148	2.30925e-33	3.94655	3.45377e-25	153.305	91.3797	2212.81
Smp_123020	protein serine:threonine kinase	0.578077	-2.57355	1.99548	2	-3.68849	3.05101e-05	5.69558	2.48077e-11	2.00709	0.0279795	10.2413	0.455348	42.0621
Smp_063330	hypothetical protein	-0.509195	-1.48394	1.99313	5	-1.30154	0.000180818	4.88857	9.50527e-53	3.58703	2.05593e-29	180.205	68.1671	1987.66
Smp_088260	cell wall protein awa1p	-2.85376	0.861307	1.99245	13	5.00516	8.74546e-13	1.44324	0.0378927	6.44841	1.29066e-20	0.558407	24.1721	65.4713
Smp_139530	tumor protein p73	-3.98941	2.00411	1.9853	13	7.52788	1.1723e-22	-0.0221736	0.988812	7.50571	2.00497e-22	0.202235	83.526	76.4332
Smp_096790	hypothetical protein	-0.532814	-1.44828	1.9811	5	-1.14811	0.0343322	4.79726	2.25809e-24	3.64914	6.9339e-15	46.2321	18.962	545.981
Smp_153550	hypothetical protein	-0.564897	-1.41394	1.97884	5	-1.11087	0.00786909	4.7365	5.61003e-38	3.62563	7.55937e-24	70.9425	30.318	809.913
Smp_051810	elongation of very long chain fatty acids	-0.271817	-1.69911	1.97092	5	-1.91483	1.16451e-12	5.29048	1.08103e-93	3.37565	4.52949e-40	258.71	62.7329	2410.54
Smp_007070	neuropeptide Y receptor invertebrate	0.879585	-2.8493	1.96971	2	-4.77469	2.46504e-13	6.57243	7.17691e-25	1.79775	0.00024634	25.2028	0.623839	80.7291
Smp_014570	Saposin,IPR008139 Saposin	-1.0646	-0.903405	1.968	5	0.338858	0.58597	4.13934	1.07766e-23	4.47819	1.23779e-26	9.19367	11.058	196.624
Smp_141680	fasciclin domain containing protein	-0.483746	-1.48154	1.96528	5	-1.30996	0.00414721	4.7597	5.64833e-31	3.44974	4.40179e-17	22.3816	8.23694	230.167
Smp_127450	hypothetical protein	0.588076	-2.5467	1.95863	2	-3.86009	6.04377e-07	5.68415	3.39559e-14	1.82406	0.0113535	4.23989	0.186435	14.5364
Smp_175270	hypothetical protein	-0.513109	-1.44539	1.9585	5	-1.00365	0.367347	4.26455	1.28298e-06	3.2609	0.000266484	2.45723	1.03396	27.4488
Smp_095520	dynein light chain	-0.706715	-1.25168	1.9584	5	-0.654509	0.13367	4.54783	9.84693e-39	3.89332	7.00583e-30	74.0054	44.1018	1016.87
Smp_140610	iron:zinc purple acid phosphatase protein	-0.422541	-1.53326	1.9558	5	-1.45998	0.00249409	4.85127	1.46449e-28	3.39128	7.23945e-15	27.2334	8.98832	267.151
Smp_155620	hypothetical protein	-0.750042	-1.20312	1.95317	5	-0.50885	0.170745	4.50477	1.2159e-52	3.99592	1.29601e-42	28.3037	18.9009	412.883
Smp_149010	protocadherin gamma b	1.08268	-3.03457	1.9519	2	-4.53753	4.39609e-07	5.77535	5.72038e-11	1.23782	0.137732	2.38275	0.0403259	5.30939
Smp_212710	gynecophoral canal protein, putative	-0.409761	-1.54108	1.95084	5	-1.52133	0.0192725	4.71383	5.37842e-16	3.1925	7.15344e-08	14.9374	4.76538	137.674
Smp_194860	hypothetical protein	-0.668604	-1.28213	1.95073	5	-0.769172	0.0989872	4.57811	1.53365e-31	3.80893	5.07195e-22	398.436	216.465	5233.84
Smp_147730	single kunitz protease inhibitor	-0.395753	-1.55426	1.95001	5	-1.47972	0.00214684	4.86003	1.0192e-28	3.38031	6.47875e-15	77.9277	24.9853	752.294
Smp_128930	spectrin beta chain	0.686062	-2.63523	1.94917	2	-4.13828	1.63976e-08	6.08171	1.20754e-17	1.94344	0.00185972	3.34566	0.12484	12.1511
Smp_161030	hypothetical protein	-0.582304	-1.36241	1.94472	5	-1.0099	0.0224638	4.64153	1.55684e-33	3.63164	1.4816e-21	40.9733	18.9238	472.011
Smp_077720	annexin B2	-0.942936	-0.999745	1.94268	5	0.0314329	0.978048	4.02576	2.62217e-15	4.05719	2.67083e-15	2.80889	2.75894	45.1548
Smp_075430	hypothetical protein	0.412131	-2.35273	1.9406	2	-2.94627	0.0057332	4.85133	1.49446e-06	1.90506	0.0707491	6.73529	0.446454	26.0798
Smp_205920	protocadherin 1	1.23994	-3.17997	1.94003	2	-5.16259	2.11614e-11	6.44156	1.93947e-17	1.27897	0.0106761	30.6285	0.395209	68.223
Smp_214190	calpain	-0.430212	-1.50137	1.93158	5	-1.38046	0.0306034	4.60222	1.18555e-16	3.22176	2.80613e-09	4.38672	1.46209	39.94
Smp_106970	family S9 non peptidase ue (S09 family)	0.739082	-2.66512	1.92604	2	-4.35794	1.79568e-11	6.33664	1.33539e-23	1.9787	0.0011087	22.8459	0.803888	84.5795
Smp_046630	hypothetical protein	-0.467521	-1.45571	1.92323	5	-1.27026	0.00624252	4.7364	1.49293e-29	3.46615	4.51537e-16	636.783	239.808	6580.23
Smp_148910	hypothetical protein	-0.0269524	-1.89614	1.92309	5	-2.36874	0.00136213	5.11585	3.39408e-14	2.74711	1.99772e-06	13.5249	2.08101	85.6662
Smp_143680	laminin subunit	-0.305952	-1.61552	1.92148	5	-1.60295	0.0307466	4.92915	1.0387e-14	3.3262	1.05938e-08	0.474242	0.134346	4.72309
Smp_105360	neurogenic locus notch protein	-5.34779	3.42714	1.92065	6	7.93619	8.53089e-19	-2.00816	0.000592959	5.92802	1.77258e-10	0	19.7762	4.33358
Smp_157820	serine protein kinase ATM	-1.61101	-0.304513	1.91552	5	1.95429	3.45195e-05	3.16849	3.86881e-15	5.12278	8.63172e-32	0.483592	1.89111	16.4959
Smp_155890	alkaline phosphatase	-0.409604	-1.50007	1.90967	5	-1.39535	0.000670021	4.81826	4.868e-40	3.42291	1.85916e-24	12.5243	4.3109	121.713
Smp_047660	Ferritin-2 heavy chain	0.0150415	-1.9245	1.90946	5	-2.4344	0.000104953	5.32241	5.23252e-20	2.88801	1.99046e-08	17.4362	2.66716	120.908
Smp_090080	Estrogen regulated protein EP45	-0.531036	-1.37463	1.90567	5	-1.10867	0.000389421	4.66497	3.30216e-59	3.5563	5.77992e-35	221.554	96.2546	2375.36
Smp_180670	hypothetical protein	0.184331	-2.0897	1.90537	5	-2.74205	0.000344389	5.44871	2.96548e-14	2.70666	6.79735e-05	5.89165	0.664219	37.6537
Smp_140990	hypothetical protein	0.62666	-2.52874	1.90208	2	-3.8505	8.52019e-07	5.60061	1.49887e-13	1.75011	0.0129813	4.46518	0.191876	14.1329
Smp_105420	Saposin,IPR008139 Saposin	-0.971531	-0.923979	1.89551	5	0.152073	0.831549	3.89706	3.77645e-19	4.04914	2.73123e-20	54.416	57.8315	868.949
Smp_051660	hypothetical protein	-0.991186	-0.901987	1.89317	5	0.221243	0.664002	4.03351	1.0669e-33	4.25475	7.32672e-37	75.1371	83.4679	1327.19
Smp_141610	cathepsin b	-0.499938	-1.39195	1.89189	5	-1.19013	0.0032845	4.63371	2.1044e-36	3.44358	2.72498e-20	391.566	159.49	3972.63
Smp_147420	pro neuregulin membrane bound	0.224889	-2.11581	1.89092	5	-3.13645	6.0844e-13	5.65047	1.27853e-41	2.51402	8.09811e-13	33.8864	3.35018	175.974
Smp_017420	voltage gated hydrogen channel 1	0.599	-2.48757	1.88857	2	-4.08688	6.51152e-16	6.10725	2.3994e-35	2.02037	5.01641e-08	33.7651	1.5618	123.854
Smp_011830	hypothetical protein	-0.363391	-1.52119	1.88458	5	-1.52338	0.000504933	4.75498	2.70637e-32	3.2316	6.02369e-16	69.7383	21.9151	607.223
Smp_074710	Def8 protein	0.305318	-2.18839	1.88307	5	-3.25127	5.74305e-09	5.65754	3.91306e-26	2.40627	2.12139e-07	14.5083	1.24274	71.0132
Smp_160360	sodium:chloride dependent neurotransmitter	-0.0249795	-1.85674	1.88172	5	-2.20736	0.00705034	4.7319	2.69009e-10	2.52453	0.000440611	3.34458	0.544371	18.9347
Smp_071520	hypothetical protein	-0.434535	-1.44685	1.88139	5	-1.27378	0.0574608	4.62937	1.68627e-16	3.35559	1.7817e-10	21.8336	8.06899	214.35
Smp_089320	Cell wall integrity and stress response	-0.502465	-1.378	1.88046	5	-1.07744	0.0463654	4.41053	1.6817e-21	3.33309	3.1212e-13	21.9361	9.37938	206.158
Smp_067060	Cathepsin B1 isotype 2	-1.18621	-0.693761	1.87997	5	0.736227	0.302116	3.5996	1.26585e-10	4.33583	1.69751e-14	10.1904	16.403	212.577
Smp_164730	rhodopsin orphan GPCR	0.604935	-2.48442	1.87948	2	-3.96559	7.10376e-11	5.90771	2.00198e-23	1.94212	0.000544682	21.222	0.989523	75.5395
Smp_167160	dynamin binding protein	0.816848	-2.69427	1.87742	2	-4.60518	2.9993e-15	6.17348	4.29153e-27	1.5683	0.00142117	16.0315	0.48495	43.6032
Smp_139160	SmCL2 peptidase (C01 family)	-0.756986	-1.11918	1.87616	5	-0.4187	0.675871	3.99609	2.59403e-09	3.57739	1.01319e-07	9.44793	6.46838	118.007
Smp_137610	focal adhesion kinase 1	0.67772	-2.54404	1.86632	2	-4.13016	8.66624e-10	5.79479	1.18742e-18	1.66463	0.0126894	13.6079	0.566618	40.9778
Smp_009230	hypothetical protein	-0.573208	-1.28234	1.85555	5	-0.872709	0.272139	4.28335	1.61297e-11	3.41065	1.22661e-07	61.3371	29.6006	669.377
Smp_006730	DNA damage regulated autophagy modulator protein	-2.10558	0.250548	1.85503	13	3.27505	5.70331e-09	2.22716	4.54471e-06	5.50221	4.50876e-24	2.49467	25.7487	120.476
Smp_118560	hypothetical protein	-0.170062	-1.67855	1.84861	5	-1.93008	5.6607e-05	4.98387	1.19378e-29	3.05379	6.03409e-14	52.9681	12.497	405.382
Smp_176120	ring finger protein 11 (sid 1669) (nedd4 ww	-0.641723	-1.2048	1.84652	5	-0.595877	0.428498	4.17592	4.32377e-14	3.58004	7.81137e-11	12.9375	7.77666	148.879
Smp_063530	apoferritin-2	-0.439289	-1.40317	1.84246	5	-1.2351	0.0200481	4.48666	1.11837e-21	3.25155	4.53672e-12	48.4189	18.4314	432.758
Smp_147800	Lmp3 protein	1.42885	-3.26994	1.84109	2	-5.73791	5.90525e-14	6.41898	2.29466e-17	0.681063	0.385143	18.3806	0.17402	27.0083
Smp_144280	tensin	0.509765	-2.34862	1.83886	2	-3.71001	2.72069e-10	5.74685	6.79269e-24	2.03685	0.00011245	8.64023	0.518784	32.7438
Smp_089290	alpha galactosidase:alpha n	-0.839065	-0.998527	1.83759	5	-0.1045	0.866301	4.04205	1.05504e-30	3.93755	2.58718e-29	10.6069	9.25594	150.575
Smp_158100	hypothetical protein	0.20413	-2.04019	1.83606	2	-2.99109	9.24296e-10	5.44604	4.90773e-31	2.45495	6.46921e-08	7.58462	0.84374	38.8848
Smp_046800	fatty acid binding protein	-0.430811	-1.40391	1.83472	5	-1.24289	0.0235312	4.51716	6.75257e-21	3.27426	8.47001e-12	54.0981	20.1267	496.971
Smp_131020	transmembrane and TPR repeat containing protein	-0.0657713	-1.76352	1.82929	5	-2.15162	0.00208901	4.76534	2.20523e-13	2.61372	8.89062e-05	17.8843	3.26655	107.983
Smp_137720	hypothetical protein	-1.15927	-0.669534	1.8288	5	0.71519	0.417521	3.31305	2.4764e-07	4.02824	1.19702e-09	10.6215	17.2021	180.056
Smp_000820	hypothetical protein	-0.218823	-1.60386	1.82268	5	-1.84067	4.60043e-06	4.82412	2.7636e-37	2.98345	3.08022e-15	209.031	52.6248	1509.07
Smp_170630	Periostin, putative	-0.115489	-1.69212	1.80761	5	-2.07034	0.000131623	4.73515	9.49649e-21	2.6648	1.43116e-07	15.4192	3.18839	92.8484
Smp_075400	hypothetical protein	-0.499045	-1.30551	1.80456	5	-0.946905	0.278028	3.98214	1.49832e-08	3.03523	2.10169e-05	10.3498	4.81155	88.474
Smp_194960	25 kDa integral membrane protein	-0.534823	-1.26573	1.80055	5	-0.941323	0.0582131	4.25852	7.57237e-25	3.31719	8.14508e-17	20.8825	9.8573	191.646
Smp_172960	serine type protease inhibitor	-0.507049	-1.29337	1.80042	5	-0.976363	0.217631	4.23151	3.05602e-11	3.25515	2.33614e-07	38.4073	17.3061	367.774
Smp_180810	Papilin	-0.0822727	-1.71343	1.7957	5	-2.14195	0.000309143	4.70671	2.4495e-17	2.56476	4.92842e-06	5.34129	1.08554	30.3963
Smp_194810	#N/A	-0.23295	-1.56272	1.79567	5	-1.60486	0.0992251	4.25575	5.26515e-07	2.65089	0.0020204	4.92849	1.34456	32.8492
Smp_131080	hypothetical protein	-0.319994	-1.47541	1.79541	5	-1.49382	0.0188488	4.41529	4.07638e-15	2.92147	1.0028e-07	14.3628	4.45103	103.715
Smp_056990	thyroid receptor interacting protein 11	-0.273771	-1.51944	1.79321	5	-1.66039	0.000867402	4.51136	1.04172e-22	2.85097	7.74638e-10	38.4279	11.1489	263.113
Smp_126010	neuropeptide Y receptor invertebrate	0.601414	-2.39102	1.78961	2	-3.81053	2.00453e-07	5.6078	2.66543e-15	1.79727	0.00322517	16.9845	0.848165	55.7758
Smp_181070	hypothetical protein	-1.12749	-0.661052	1.78854	5	0.738348	0.483353	3.23158	2.33512e-05	3.96993	4.09511e-07	4.4421	7.48176	81.0511
Smp_136190	hypothetical protein	0.424415	-2.2123	1.78788	2	-3.53256	6.95734e-10	5.50306	5.43742e-23	1.9705	0.000872647	71.6309	5.20432	267.977
Smp_124040	FMRFamide activated amiloride sensitive sodium	0.186668	-1.97427	1.78761	2	-2.67688	0.0018937	4.67124	9.86159e-09	1.99436	0.0213462	17.1857	1.95921	69.3544
Smp_142970	palmitoyl protein thioesterase 1	-0.488009	-1.29859	1.7866	5	-1.07233	0.146891	4.24829	5.37079e-12	3.17596	2.88078e-07	12.8095	5.47688	115.35
Smp_088270	subfamily M14A unassigned peptidase	-0.38223	-1.40185	1.78408	5	-1.33707	0.0374195	4.28308	2.23411e-14	2.94601	1.16806e-07	9.4389	3.34358	70.1404
Smp_055220	surface protein PspC	-0.732258	-1.05143	1.78369	5	-0.274845	0.814982	3.61293	7.3021e-07	3.33809	4.99409e-06	1.23567	0.940027	13.3266
Smp_174550	hypothetical protein	0.432196	-2.20861	1.77641	2	-3.31839	1.26297e-06	5.30186	6.92758e-16	1.98347	0.000478939	25.1955	1.80285	92.9602
Smp_105450	saposin containing protein	-1.05796	-0.71586	1.77382	5	0.550918	0.464409	3.49126	1.23365e-10	4.04218	2.72775e-13	14.5138	20.2756	240.084
Smp_053900	beta hexosaminidase subunit beta	-0.36394	-1.40858	1.77252	5	-1.39708	2.63458e-05	4.51282	5.55836e-49	3.11575	2.36814e-25	32.886	11.5913	257.986
Smp_155570	endoglycoceramidase	-0.568636	-1.20147	1.7701	5	-0.788096	0.181622	4.04296	3.41815e-17	3.25486	1.26599e-11	14.234	7.71154	128.099
Smp_156910	hypothetical protein	0.084238	-1.85419	1.76995	2	-2.53639	6.46697e-05	4.90895	3.29754e-16	2.37256	9.68209e-05	7.65876	1.10517	38.3016
Smp_194910	Saposin B domain containing protein	-0.705039	-1.05561	1.76065	5	-0.360312	0.518525	3.98702	2.1539e-25	3.62671	9.32551e-22	21.0257	15.5736	242.124
Smp_065370	hypothetical protein	-0.306738	-1.45358	1.76031	5	-1.46888	0.0034943	4.3735	1.65544e-22	2.90461	6.38848e-12	15.3116	4.99099	105.512
Smp_204760	Asparagine rich protein (Ag319) (ARP)	0.17912	-1.93911	1.75999	2	-2.36645	0.0211784	4.31463	6.09435e-06	1.94818	0.0508856	2.44611	0.311122	10.0211
Smp_125990	hypothetical protein	0.462581	-2.20919	1.74661	2	-3.30796	3.6469e-06	5.36962	4.37771e-15	2.06166	0.000990893	2.41377	0.176734	9.525
Smp_194720	hypothetical protein	-0.347647	-1.39771	1.74535	5	-1.28226	0.0785238	4.15825	2.93669e-11	2.876	3.46826e-06	7.94966	2.88166	56.3679
Smp_060700	adaptor protein complex 1, sigma 2	-0.418907	-1.30862	1.72753	5	-1.0806	0.0134129	4.2764	1.07805e-28	3.1958	5.22749e-17	59.0197	25.4184	492.844
Smp_159440	schwannomin interacting protein	0.147077	-1.87402	1.72695	2	-2.7236	6.87523e-09	5.10831	1.2025e-29	2.38471	1.19288e-07	177.652	24.1616	863.042
Smp_121950	hypothetical protein	-0.263295	-1.4532	1.7165	5	-1.40339	0.0499014	4.29787	3.051e-12	2.89448	9.72876e-07	2.74659	0.858835	19.5082
Smp_163520	hypothetical protein	-0.123529	-1.58725	1.71078	5	-1.74784	0.0323792	4.17406	9.73904e-09	2.42622	0.000590878	6.47795	1.51138	33.7422
Smp_021280	hypothetical protein	-0.602157	-1.10571	1.70787	5	-0.520519	0.421459	4.0362	3.42997e-17	3.51568	2.25417e-13	19.9815	12.7028	214.638
Smp_077880	annexin	-0.655651	-1.04893	1.70458	5	-0.484575	0.621564	3.58701	2.30113e-07	3.10244	9.56251e-06	7.08359	4.59387	63.3035
Smp_153870	serine:threonine protein kinase ULK4	0.0344842	-1.7367	1.70221	5	-2.26568	5.63057e-05	4.87602	2.99859e-20	2.61034	6.46554e-07	4.54405	0.809297	26.0168
Smp_094190	serine:threonine protein kinase NIM1	0.377911	-2.07679	1.69888	2	-3.00519	0.000144389	4.7278	4.48909e-10	1.72261	0.0239694	6.91871	0.625838	21.6349
Smp_028490	1 acyl sn glycerol 3 phosphate acyltransferase	-3.14862	1.45423	1.6944	13	6.00417	3.46073e-21	0.237513	0.698198	6.24169	1.28067e-22	0.562828	55.3392	60.5624
Smp_075800	hemoglobinase	-1.03653	-0.655977	1.6925	5	0.598959	0.392424	3.1747	3.80061e-09	3.77366	3.53214e-12	12.0388	17.5223	165.485
Smp_130920	multiple C2 and transmembrane domain containing protein	0.913662	-2.60318	1.68952	2	-4.4318	4.4933e-10	5.64681	5.97101e-16	1.21501	0.0959918	16.0061	0.487748	34.6295
Smp_070780	UDP glucose 4 epimerase	-0.36436	-1.32514	1.6895	5	-1.22341	0.0252433	4.14137	1.2288e-17	2.91796	2.93559e-09	37.213	14.0533	265.814
Smp_146250	fucosidase, alpha L 2, plasma	-0.0547659	-1.6326	1.68737	5	-2.08752	9.22924e-05	4.56558	1.11163e-19	2.47806	1.42002e-06	33.8488	7.09086	178.416
Smp_103610	cathepsin B-like cysteine proteinase	-0.866344	-0.819162	1.68551	5	0.0779353	0.946024	3.38956	3.21606e-07	3.4675	2.23224e-07	23.9848	24.1197	280.055
Smp_212450	placental protein 11	0.206261	-1.89077	1.68451	2	-2.71824	2.24206e-06	4.90245	1.7807e-19	2.18422	1.40415e-06	12.5466	1.60733	52.5527
Smp_139240	cathepsin S (C01 family)	-0.892699	-0.787866	1.68056	5	0.280802	0.726395	3.37053	4.66071e-11	3.65133	2.29273e-12	5.14103	6.09681	62.8469
Smp_194090	subfamily S1A unassigned peptidase (S01 family)	-0.19465	-1.48317	1.67782	5	-1.71927	0.000597514	4.49574	2.62195e-22	2.77647	2.15965e-09	52.3373	14.3932	335.273
Smp_140770	protein phosphatase 7	0.823076	-2.50004	1.67696	2	-4.3153	1.44081e-10	5.52446	6.50089e-17	1.20916	0.0784915	20.8246	0.751471	44.8208
Smp_020130	hypothetical protein	1.19669	-2.87199	1.6753	2	-4.88089	2.57199e-08	5.74344	3.23219e-11	0.862546	0.41062	18.588	0.326105	31.8985
Smp_187480	hypothetical protein	-0.750816	-0.922505	1.67332	5	-0.111371	0.874851	3.71657	9.15711e-20	3.6052	1.4664e-18	33.1008	28.8285	373.893
Smp_162060	Nose resistant to fluoxetine protein 6	-0.0473749	-1.62507	1.67244	5	-1.99607	0.00249548	4.39824	7.19891e-13	2.40217	0.0001414	14.3893	2.98676	74.1811
Smp_156970	cadherin	0.774799	-2.44467	1.66987	2	-3.86714	1.55402e-05	5.10356	5.26408e-09	1.23642	0.234726	33.1905	1.45922	74.4334
Smp_175930	ELAVprotein 2:3:4	1.39827	-3.06526	1.66698	2	-4.45177	4.07222e-05	4.82792	7.73168e-06	0.376144	0.804844	12.5384	0.151532	15.1336
Smp_144020	glutamine rich protein 2	0.48538	-2.14404	1.65866	2	-2.91328	0.00893665	4.3435	4.5229e-05	1.43022	0.245246	6.47648	0.487097	18.6049
Smp_084270	rhodopsin orphan GPCR	-0.519932	-1.13636	1.65629	5	-0.807499	0.333175	3.78996	6.9361e-09	2.98246	5.54158e-06	6.38148	3.33749	50.415
Smp_205270	ring finger protein 11 (sid 1669) (nedd4 ww	-0.146703	-1.50846	1.65516	5	-1.62779	0.0474853	4.09055	1.80193e-08	2.46276	0.000619236	26.2401	7.09449	141.367
Smp_203130	Actin 5C	-0.0594603	-1.59437	1.65383	5	-1.99052	2.42343e-05	4.45663	6.18162e-24	2.46611	7.48009e-09	43.2749	9.45416	218.021
Smp_078230	cGMP dependent protein kinase, isozyme 2 forms	1.07329	-2.72568	1.65239	2	-5.08601	2.09198e-18	6.0888	3.03662e-26	1.00279	0.122245	113.808	2.58853	210.217
Smp_179750	protocadherin 1	0.72501	-2.37405	1.64904	2	-3.98603	7.68556e-09	5.38903	1.41663e-15	1.403	0.0525372	33.2772	1.58745	81.4305
Smp_210790	transmembrane BAX inhibitor motif containing	-0.519315	-1.12704	1.64635	5	-0.731915	0.00863905	4.02512	3.30216e-59	3.2932	4.00806e-40	401.933	224.875	3512.6
Smp_130100	saposin containing protein	-0.825995	-0.815499	1.64149	5	0.0904769	0.927997	3.37862	1.03951e-08	3.4691	6.06373e-09	44.4858	43.9673	496.754
Smp_123880	hypothetical protein	-0.861891	-0.777049	1.63894	5	0.160089	0.896536	3.14057	2.2781e-05	3.30066	1.02564e-05	14.9793	15.833	158.928
Smp_169570	glycerol 3 phosphate dehydrogenase	-0.135164	-1.49913	1.63429	5	-1.83703	0.000291411	4.327	2.99859e-20	2.48997	4.44415e-08	17.203	4.33524	90.0815
Smp_167630	zinc transporter foi	0.15756	-1.7908	1.63324	2	-2.59554	8.86053e-06	4.63595	8.04821e-17	2.04041	0.000164503	12.7725	1.82181	49.2044
Smp_141390	innexin unc 9	-0.280106	-1.35127	1.63137	5	-1.3284	0.0582351	3.92483	1.36207e-10	2.59643	2.05528e-05	7.44657	2.61628	44.1359
Smp_158440	Transcription initiation factor TFIID subunit 3	-1.25363	-0.377697	1.63132	5	1.33312	0.00277883	2.89784	8.41076e-13	4.23096	3.23083e-25	33.2254	80.3538	595.445
Smp_076300	forkhead box protein F1	-0.0701988	-1.55982	1.63002	5	-1.74273	0.114252	3.93422	6.03754e-05	2.1915	0.0366631	4.23548	0.970487	21.0044
Smp_145320	solute carrier family 26	0.637126	-2.26588	1.62876	2	-3.69978	2.96641e-07	5.14702	2.4497e-13	1.44725	0.0326465	7.80175	0.449072	19.8987
Smp_075500	hypothetical protein	0.584606	-2.20945	1.62485	2	-3.50633	5.66843e-08	4.97048	2.53528e-15	1.46415	0.00901742	30.339	1.90002	75.7365
Smp_125210	Aquaporin 9 (AQP 9) (Small solute channel 1)	2.96097	-4.58581	1.62484	15	-5.39443	2.38089e-06	3.74495	0.00189465	-1.64948	0.17998	19.897	0	4.44852
Smp_138290	hypothetical protein	0.677048	-2.29753	1.62048	2	-3.65682	3.32003e-06	5.02892	5.26752e-11	1.3721	0.0815159	9.88367	0.490718	24.5778
Smp_007760	alanine aminotransferase 2	-0.385036	-1.23526	1.6203	5	-1.04011	0.0173037	3.94786	9.08799e-25	2.90774	2.46992e-14	20.3789	9.13407	138.57
Smp_140820	hypothetical protein	-0.325572	-1.29441	1.61998	5	-1.21457	0.0956034	3.92551	3.68109e-10	2.71093	1.87916e-05	7.00931	2.63564	45.2395
Smp_140510	TLC domain containing protein 2	-0.489614	-1.1294	1.61902	5	-0.780559	0.0278559	3.93724	4.23295e-37	3.15668	3.08788e-24	121.369	65.0477	977.885
Smp_128920	spectrin beta chain	0.995701	-2.60929	1.61359	2	-4.41131	4.56227e-09	5.43667	2.19817e-13	1.02535	0.114016	5.01541	0.143482	9.4886
Smp_128230	neurogenic locus notch protein	-0.087859	-1.52418	1.61204	5	-1.85987	9.04459e-05	4.34475	1.29785e-22	2.48488	1.58102e-08	19.4156	4.77025	100.709
Smp_156370	coiled coil domain containing protein 147	0.393276	-1.98762	1.59435	2	-2.98168	0.000798177	4.67336	4.19e-08	1.69168	0.0722617	12.7748	1.19443	42.1302
Smp_171140	serine rich repeat protein	0.743693	-2.33729	1.59359	2	-4.05291	9.39828e-14	5.28511	5.25264e-23	1.2322	0.0233501	23.4613	1.12477	49.5369
Smp_174530	aminopeptidase PILS (M01 family)	-1.48753	-0.105858	1.59339	8	1.62497	NA	1.91984	NA	3.54482	NA	0.525141	2.09466	9.70655
Smp_198970	Phospholipase A2	-0.684615	-0.90142	1.58603	5	-0.203033	0.781232	3.58946	1.89101e-14	3.38642	9.58159e-13	25.342	20.8915	251.874
Smp_173480	hypothetical protein	-0.225354	-1.3595	1.58485	5	-1.48866	0.0145536	3.93862	9.30354e-13	2.44995	1.4555e-05	27.9739	9.08749	145.92
Smp_180290	membrane associated guanylate kinase ww and pdz	0.441683	-2.02432	1.58264	2	-3.03911	3.04179e-05	4.6617	3.25953e-11	1.62259	0.0258254	7.34991	0.665805	21.5265
Smp_136730	cathepsin d (lysosomal aspartyl protease)	-0.560112	-1.02239	1.5825	5	-0.581949	0.553839	3.40716	1.57977e-06	2.82521	7.03738e-05	3.36566	2.05874	24.1047
Smp_139810	coiled coil domain containing protein 39	0.828253	-2.40947	1.58122	2	-4.29961	3.2692e-12	5.45358	2.68136e-19	1.15397	0.106938	95.96	3.84903	199.215
Smp_143750	transmembrane protein 63A	-2.03602	0.457168	1.57885	13	3.66271	8.46202e-22	1.71781	6.97988e-07	5.38052	1.08021e-46	3.4092	43.7166	136.221
Smp_156620	integrin alpha 7	-1.62072	0.0441184	1.5766	8	2.33091	0.00559597	2.00032	0.0152112	4.33124	5.67324e-08	1.39064	8.28596	34.3528
Smp_151010	monocarboxylate transporter	0.33243	-1.90688	1.57445	2	-3.04516	5.41243e-21	4.99175	4.82536e-56	1.94659	1.54521e-10	71.6947	7.96084	246.305
Smp_200090	hypothetical protein	0.100916	-1.66832	1.5674	2	-2.25854	5.04311e-06	4.57567	1.897e-22	2.31712	6.09463e-07	220.082	39.4974	987.438
Smp_123480	serine:threonine kinase 33	0.566254	-2.13295	1.5667	2	-3.52751	7.61885e-09	5.049	2.27518e-17	1.52149	0.019436	70.6813	5.01687	190.873
Smp_128220	neurogenic locus notch	-0.194121	-1.37227	1.56639	5	-1.52537	0.0549057	3.98923	1.37268e-08	2.46386	0.000560588	11.4746	3.41346	63.7073
Smp_131230	F box:WD repeat containing protein 10	-1.22651	-0.338852	1.56536	8	1.23367	0.248463	2.27803	0.0135457	3.5117	0.000117516	0.997205	2.5923	14.1048
Smp_025030	dual specificity protein kinase	-0.461372	-1.10079	1.56216	5	-0.747291	0.437353	3.54999	2.03424e-06	2.8027	0.000260361	8.46572	4.62932	62.4366
Smp_058660	hypothetical protein	-0.166396	-1.39524	1.56164	5	-1.56661	0.00973937	3.99651	2.52017e-13	2.4299	5.67751e-06	44.4245	13.3258	221.657
Smp_127190	hypothetical protein	-0.758845	-0.802683	1.56153	5	0.127916	0.897352	3.1754	1.18512e-07	3.30332	4.72978e-08	24.616	25.1067	243.222
Smp_170980	hypothetical protein	-0.591731	-0.963166	1.5549	5	-0.423691	0.593089	3.45637	8.31469e-10	3.03268	1.10073e-07	7.89401	5.46781	63.349
Smp_056370	deoxyhypusine hydroxylase:monooxygenase	-1.08026	-0.472418	1.55268	5	0.973683	NA	3.14875	NA	4.12244	NA	8.63852	16.5604	155.162
Smp_000850	cysteine string protein	-1.00301	-0.549579	1.55259	5	0.790324	0.0330836	2.99768	7.63849e-21	3.78801	7.87095e-32	33.6872	54.454	426.306
Smp_037780	hypothetical protein	-0.070756	-1.47346	1.54422	5	-1.85182	5.78824e-11	4.3681	7.56135e-59	2.51628	9.14002e-22	61.1548	15.492	312.57
Smp_172750	cation transporting atpase worm	-1.22295	-0.310362	1.53332	8	1.2696	0.106019	2.38361	0.000339309	3.65321	8.39015e-08	0.955387	2.42706	12.7079
Smp_126300	secretory pathway calcium atpase e	-0.656173	-0.877102	1.53328	5	-0.130314	0.846474	3.43588	6.60159e-17	3.30556	1.745e-15	20.3462	17.3423	184.811
Smp_103140	alpha tubulin	0.265347	-1.7968	1.53145	2	-2.69779	0.000253337	4.44546	2.59975e-10	1.74766	0.0132767	8.74475	1.08379	28.2484
Smp_167660	Protein phosphatase 1 regulatory subunit 3B	0.279505	-1.8092	1.5297	2	-2.85614	7.34222e-13	4.71773	3.92864e-34	1.86159	2.40188e-06	65.2846	8.14452	216.793
Smp_057860	hypothetical protein	-0.659018	-0.869977	1.529	5	-0.109545	0.923491	3.11263	3.15785e-06	3.00309	8.1216e-06	9.21041	7.61243	74.1678
Smp_204310	hypothetical protein	0.621241	-2.14966	1.52842	2	-3.69584	4.85752e-14	5.11477	1.86691e-26	1.41893	0.00108556	61.417	4.08303	149.034
Smp_161210	hypothetical protein	1.82359	-3.35121	1.52763	2	-5.313	3.93759e-08	5.24912	6.94806e-08	-0.0638879	0.96431	10.5049	0.0591746	8.99183
Smp_158350	integrin alpha 7	-1.21174	-0.313035	1.52477	8	1.22567	0.180705	2.50486	0.0014999	3.73053	2.07694e-06	3.29188	8.13527	50.0568
Smp_035260	epidermal growth factor receptor kinase	-0.2156	-1.30542	1.52102	5	-1.36087	0.0347271	3.79053	1.55377e-11	2.42966	5.41814e-06	4.81347	1.6636	23.9928
Smp_035560	hypothetical protein	-0.981294	-0.532167	1.51346	5	0.728311	0.260798	2.87143	6.82671e-09	3.59974	2.00031e-12	8.90128	14.0787	105.732
Smp_035300	snare protein sec22	-1.00602	-0.505619	1.51164	5	0.842964	0.050218	2.86273	3.10082e-14	3.7057	6.94832e-23	137.295	231.278	1663.1
Smp_033550	sodium:potassium transporting ATPase subunit	-0.0530227	-1.45167	1.5047	2	-1.79528	0.00150031	3.99842	1.11706e-14	2.20313	4.70679e-06	15.0148	3.7472	62.6847
Smp_212300	Rho GTPase activator (Rgd1)	-2.98427	1.48071	1.50356	13	5.78768	5.45689e-15	-0.0621991	0.947758	5.72548	2.1175e-14	0.0698272	6.6699	5.8584
Smp_164550	hypothetical protein	0.114398	-1.61503	1.50063	2	-2.34778	4.84583e-09	4.28664	1.39755e-28	1.93886	7.43512e-07	360.908	64.806	1263.15
Smp_099690	RER1 retention in endoplasmic reticulum 1	-0.580789	-0.908806	1.4896	5	-0.317385	0.563454	3.46381	7.99021e-19	3.14642	1.91866e-15	261.391	192.756	2123.39
Smp_123710	acetyl-CoA carboxylase	-0.141596	-1.34732	1.48891	5	-1.57616	0.0167751	4.0301	1.53017e-11	2.45393	6.63345e-05	3.72851	1.12258	19.8254
Smp_000660	ornithine aminotransferase	0.104123	-1.59243	1.48831	2	-2.29486	1.31839e-10	4.27454	3.0886e-35	1.97968	2.09236e-08	116.932	21.4237	417.474
Smp_161070	hypothetical protein	0.159127	-1.64065	1.48152	2	-2.37479	1.00304e-05	4.32253	2.51822e-17	1.94773	6.16091e-05	20.8128	3.46221	73.516
Smp_080860	#N/A	0.83915	-2.31265	1.4735	2	-4.09455	5.67089e-09	5.25387	2.58223e-14	1.15933	0.133953	82.028	3.62531	172.396
Smp_035700	adenosine deaminase	-1.12394	-0.337696	1.46164	8	1.24474	0.000493401	2.60081	2.79488e-15	3.84554	2.77685e-31	37.1489	84.5866	491.685
Smp_128110	aquaporin 1	0.423009	-1.87287	1.44986	2	-2.93439	5.31797e-07	4.65664	1.21142e-16	1.72225	0.000433667	13.7364	1.46263	41.8099
Smp_130880	histone H2A	-0.445126	-1.00189	1.44702	5	-0.549309	0.5713	3.29272	3.05212e-06	2.74341	0.000119689	8.85297	5.43182	58.7953
Smp_143260	hypothetical protein	0.150491	-1.59629	1.4458	2	-2.26011	0.000217918	4.23849	2.06901e-13	1.97837	0.000608421	5.20984	0.942585	19.4521
Smp_165440	netrin receptor unc 5	0.456393	-1.90155	1.44516	2	-3.00458	NA	4.47091	NA	1.46633	NA	29.4749	2.88727	77.1545
Smp_174110	protein phosphatase 1 regulatory inhibitor	-0.557213	-0.884312	1.44153	5	-0.285129	0.745696	3.28565	4.06711e-09	3.00052	7.21877e-08	2.13781	1.59565	16.8318
Smp_199090	peptidyl glycine alpha amidating	0.813498	-2.25431	1.44081	2	-4.09949	1.02823e-17	5.20382	2.85215e-28	1.10433	0.0231917	116.423	5.6755	224.162
Smp_126940	hypothetical protein	2.03567	-3.47218	1.43651	15	-5.96372	1.34676e-11	5.32079	2.9262e-09	-0.642934	0.430028	6.36977	0.0268682	3.53416
Smp_202130	hypothetical protein	-0.593289	-0.843001	1.43629	5	-0.214485	0.699012	3.22794	7.5781e-20	3.01346	1.34589e-17	38.9883	31.2415	287.456
Smp_148490	kazrin	1.1529	-2.58202	1.42912	2	-4.31536	5.03129e-06	4.66686	7.21542e-07	0.351497	0.78789	17.319	0.431235	20.2844
Smp_131990	Growth arrest specific protein 2 3	-1.71417	0.286206	1.42796	13	2.95431	4.51644e-13	1.63683	6.25445e-05	4.59114	1.63985e-30	6.39119	49.4146	147.765
Smp_058450	protein phosphatase 1 regulatory subunit	0.411076	-1.83465	1.42357	2	-2.95471	5.51695e-07	4.42095	1.22437e-14	1.46624	0.0198622	38.0716	4.20112	97.9311
Smp_192400	hypothetical protein	0.609038	-2.02878	1.41975	2	-3.49722	1.42233e-11	4.69126	2.56675e-20	1.19404	0.0107906	24.2793	1.8045	49.4554
Smp_088920	serine:threonine protein kinase	-0.0229133	-1.39634	1.41925	5	-1.60233	0.114337	3.92907	1.11418e-05	2.32675	0.0133981	2.31816	0.634879	12.5028
Smp_155330	cyclin dependent kinase 14	-0.828378	-0.587296	1.41567	5	0.509308	0.430008	2.99337	1.00687e-09	3.50268	1.15303e-12	5.88659	8.03446	63.2116
Smp_155490	#N/A	-0.772401	-0.641998	1.4144	5	0.300064	0.470542	3.03052	4.14292e-24	3.33058	2.10289e-28	19.1045	22.4804	173.881
Smp_126290	hypothetical protein	-0.739166	-0.673872	1.41304	8	0.229553	0.80547	2.83619	2.56278e-06	3.06574	4.42166e-07	9.63255	10.5725	79.5678
Smp_136370	hypothetical protein	-0.51171	-0.89856	1.41027	8	-0.445726	0.648452	3.04512	1.39928e-05	2.59939	0.000297172	15.9059	10.9498	97.3781
Smp_137710	major facilitator superfamily domain containing protein	-0.754463	-0.654174	1.40864	5	0.269545	0.545341	2.97021	9.49633e-21	3.23976	2.99597e-24	215.291	243.042	1842.83
Smp_059980	arginase	-0.984329	-0.421155	1.40548	8	0.870935	0.166349	2.44178	5.28483e-06	3.31271	5.79824e-10	16.165	27.8451	156.332
Smp_158620	retinaldehyde binding protein	0.502336	-1.90585	1.40351	2	-3.27255	7.50726e-17	4.75235	4.57702e-35	1.4798	0.000127663	87.8157	8.01029	221.284
Smp_136620	hypothetical protein	1.15816	-2.55909	1.40093	2	-4.88724	2.46023e-16	5.46226	2.48855e-20	0.575028	0.434936	659.53	17.234	869.67
Smp_123660	peroxidasin	0.153328	-1.55214	1.39881	2	-2.24363	7.56945e-06	4.0905	8.20292e-18	1.84687	3.56873e-05	3.58016	0.666245	11.8085
Smp_123010	high affinity cationic amino acid transporter 1	-0.546491	-0.840015	1.38651	8	-0.253708	0.744726	3.00913	5.66458e-09	2.75542	1.44197e-07	10.5266	8.02114	66.3673
Smp_120180	NAD dependent epimerase:dehydratase	-0.646304	-0.738204	1.38451	5	0.00608233	0.994481	3.06564	1.10501e-28	3.07173	1.38954e-28	112.679	105.035	846.444
Smp_175580	hypothetical protein	-0.300307	-1.08012	1.38042	5	-0.970335	0.147971	3.42448	8.12905e-10	2.45414	8.23755e-06	2.352	1.08666	12.1882
Smp_089240	alpha 1,6 mannosyl glycoprotein	-0.82423	-0.552534	1.37676	8	0.522716	0.125472	2.80617	1.82464e-23	3.32888	4.81832e-32	37.9847	51.2158	345.219
Smp_152480	cyclic nucleotide gated cation channel	3.18386	-4.56003	1.37618	15	-6.0794	2.22684e-08	3.70799	0.0015274	-2.37141	0.0230086	16.6472	0	2.19248
Smp_004590	hypothetical protein	0.784848	-2.15769	1.37284	2	-3.86342	1.82531e-12	4.83777	3.39007e-19	0.974349	0.0995811	32.3164	1.82253	56.7537
Smp_136180	dna polymerase eta	-1.02985	-0.339972	1.36982	8	1.0583	0.0884813	2.39441	1.36289e-05	3.45272	2.49039e-10	17.7141	35.9566	191.584
Smp_082740	Na(+):H(+) exchange regulatory cofactor	-0.18277	-1.18278	1.36555	5	-1.27994	4.62892e-05	3.64213	8.37414e-36	2.3622	2.85984e-16	74.6334	28.3985	344.8
Smp_070630	#N/A	-0.0387784	-1.32425	1.36303	2	-1.62206	0.0152126	3.63309	2.74219e-09	2.01102	0.00138975	42.3999	12.3592	161.049
Smp_098320	inositol tetrakisphosphate kinase	-0.714248	-0.647996	1.36224	8	0.194196	0.706643	2.95546	1.46078e-18	3.14966	1.46368e-20	53.7423	57.9978	435.462
Smp_166960	ubiquitin protein ligase BRE1	0.694112	-2.05394	1.35983	2	-3.16522	0.00158153	4.15188	2.06946e-05	0.986656	0.395887	4.19745	0.266229	8.27065
Smp_163810	laminin gamma 1 chain	0.960898	-2.31977	1.35888	2	-3.88077	1.6604e-05	4.29723	1.64812e-06	0.416464	0.725405	5.54379	0.213219	6.81801
Smp_015030	ethanolamine kinase 1	0.70655	-2.06016	1.35361	2	-3.73921	1.51851e-20	4.82052	6.96703e-34	1.08131	0.00341333	65.2431	4.14859	123.431
Smp_176950	hypothetical protein	3.12577	-4.47538	1.34961	15	-5.92189	1.28724e-08	3.60629	0.00140304	-2.31561	0.0161464	17.1569	0	2.37018
Smp_150970	RAB6 interacting protein 2 (ERC protein 1)	-0.975591	-0.3727	1.34829	8	0.973605	0.10219	2.47635	2.13015e-06	3.44996	2.80043e-11	9.51935	18.5452	100.527
Smp_098710	quiescin q6 sulfhydryl oxidase	0.172918	-1.51558	1.34266	2	-2.28056	7.01199e-16	4.01847	1.21034e-48	1.73792	6.23576e-11	68.0558	12.8611	200.363
Smp_208030	hypothetical protein	0.352904	-1.69505	1.34215	2	-2.79024	5.66187e-11	4.34376	1.031e-25	1.55352	0.000185303	6.34013	0.824093	16.9316
Smp_095360	14 kDa fatty acid-binding protein	-1.46521	0.12458	1.34063	13	2.32784	2.51565e-08	1.71194	6.05324e-05	4.03978	3.02094e-23	571.298	2802.67	8903.05
Smp_151490	protein vertebrate nebulin	-1.74044	0.399972	1.34047	13	2.94297	4.3025e-06	1.26624	0.0343438	4.20921	2.16287e-11	1.99627	16.6287	38.5431
Smp_079010	cAMP dependent protein kinase type II regulatory	0.205026	-1.54224	1.33721	2	-2.36388	1.71043e-16	4.09432	1.93204e-48	1.73044	2.73598e-09	566.167	101.085	1679.07
Smp_162790	membrane protein, palmitoylated 5	-0.249659	-1.08456	1.33421	8	-1.04428	0.017882	3.3074	3.59859e-17	2.26312	1.08388e-08	12.6031	5.65589	54.9548
Smp_149320	tricarboxylate transport protein	0.660636	-1.99483	1.33419	2	-3.6357	9.93902e-29	4.67374	2.25293e-47	1.03805	0.00126622	159.267	11.3887	290.245
Smp_156230	hypothetical protein	0.456952	-1.7854	1.32845	2	-3.02219	7.91755e-13	4.40804	1.24231e-26	1.38585	0.00086665	292.38	32.0675	679.774
Smp_176190	#N/A	-0.80309	-0.52242	1.32551	8	0.546649	0.170769	2.62006	7.87903e-17	3.16671	6.21009e-23	40.1251	55.0793	326.413
Smp_141830	transcriptional enhancer factor tef	0.719705	-2.03484	1.31514	2	-3.09721	0.00246554	3.9268	8.42933e-05	0.82959	0.510195	7.81428	0.533499	12.9827
Smp_164630	protein sickie	1.01574	-2.32091	1.30517	2	-3.96219	1.39374e-05	4.57559	4.06865e-07	0.613401	0.587512	4.16713	0.149669	6.00911
Smp_127280	diacylglycerol O-acyltransferase 1	0.0256952	-1.3304	1.3047	2	-1.65879	0.0271006	3.53029	2.70103e-07	1.8715	0.00898166	7.03989	1.89541	24.3333
Smp_038330	nogo B receptor	-0.545595	-0.758608	1.3042	8	-0.162494	0.732239	2.92371	8.98378e-22	2.76122	1.88003e-19	48.9471	40.5198	296.912
Smp_167230	golgi resident protein gcp60	-0.487082	-0.816931	1.30401	8	-0.326152	0.556909	3.02924	3.28918e-15	2.70308	1.83355e-12	12.2653	9.04599	72.5967
Smp_134910	serine:threonine protein kinase	0.0799073	-1.3758	1.29589	2	-1.84088	0.00743813	3.77612	3.56128e-09	1.93525	0.00469892	13.0182	3.1373	47.4552
Smp_149420	held out wings	-0.992453	-0.298956	1.29141	8	1.08664	0.144444	2.07612	0.00199581	3.16276	1.27017e-06	32.9341	68.6108	298.823
Smp_179660	hypothetical protein	-0.128549	-1.16127	1.28982	8	-1.20312	0.123595	3.19576	3.01655e-06	1.99263	0.00600027	15.1797	5.83369	58.1035
Smp_154010	Halobacterial transducer protein VI	0.565135	-1.8541	1.28896	2	-3.23886	6.92541e-11	4.61014	2.18563e-21	1.37128	0.0071937	14.3673	1.32102	33.9972
Smp_156770	major tegumental antigen SM15	0.467234	-1.75284	1.28561	2	-2.93757	4.71799e-08	4.18662	1.46114e-15	1.24905	0.0342833	59.3925	6.76932	129.069
Smp_138100	hypothetical protein	1.19657	-2.47923	1.28265	2	-4.78533	6.22172e-15	5.09556	8.67338e-17	0.310222	0.655686	14.0102	0.354863	15.4968
Smp_061970	GPI ethanolamine phosphate transferase 2	-0.742174	-0.540332	1.28251	8	0.362143	0.51182	2.62296	3.85432e-11	2.9851	9.68268e-14	19.4952	24.3078	142.966
Smp_165420	zinc finger protein	-0.820919	-0.461444	1.28236	8	0.624376	0.0741352	2.47975	8.72317e-17	3.10413	3.50519e-25	4.68766	6.91821	36.229
Smp_059530	tetraspanin	0.268557	-1.54331	1.27475	2	-2.39769	1.71053e-09	3.92822	1.5355e-24	1.53052	8.41977e-06	33.5536	5.64631	85.6725
Smp_134990	oxalate:formate antiporter	-0.450454	-0.823115	1.27357	8	-0.429767	0.693691	2.99634	8.60664e-05	2.56657	0.000947686	3.32684	2.2323	20.4123
Smp_078400	N acetylgalactosamine kinase	-0.00699191	-1.26615	1.27314	2	-1.65284	8.02781e-09	3.63361	3.88238e-40	1.98077	7.18226e-13	86.7248	25.7304	304.633
Smp_200190	lung cancer oncogene 5	0.3755	-1.64663	1.27113	2	-2.75778	2.18252e-20	4.15223	8.4895e-46	1.39444	4.03668e-06	825.347	111.888	1929.21
Smp_123050	Regulator of G protein signaling 20	1.30971	-2.58007	1.27036	2	-4.43381	2.53565e-06	4.42741	2.94828e-06	-0.00639923	1	9.63785	0.202187	8.33333
Smp_159990	Voltage gated calcium channel, L type, alpha	0.904581	-2.17265	1.26807	2	-4.04648	3.49922e-11	4.68512	8.73712e-15	0.638639	0.400163	15.1982	0.732311	21.1342
Smp_147240	mitogen activated protein kinase binding protein	-0.5885	-0.676725	1.26522	8	0.00859242	0.99776	2.86061	3.52944e-06	2.8692	4.12689e-06	4.40733	4.25822	31.4097
Smp_140120	hypothetical protein	-0.278011	-0.983515	1.26153	8	-0.848392	0.360981	2.93377	9.99665e-05	2.08538	0.00780332	4.56348	2.29842	19.1241
Smp_176270	syntaxin 5	-0.561329	-0.697914	1.25924	8	-0.0330379	0.967658	2.71924	1.05948e-10	2.68621	2.7969e-10	26.6958	24.6122	156.721
Smp_143590	hypothetical protein	-2.05109	0.792524	1.25857	9	3.31401	0.00167952	0.419776	0.758547	3.73379	0.000416554	0.684035	11.1288	14.2825
Smp_146600	ras gene family, member A	0.162289	-1.41774	1.25545	2	-2.09662	9.82435e-06	3.76955	9.22681e-17	1.67293	0.000346884	56.0954	12.0404	162.314
Smp_133600	hypothetical protein	0.774024	-2.02743	1.2534	2	-3.85911	8.97424e-30	4.68805	5.20578e-44	0.828941	0.0300676	445.62	28.0149	699.419
Smp_126120	LAMA protein 2	-0.983836	-0.267455	1.25129	8	1.06576	0.360589	1.8286	0.0718244	2.89436	0.00347751	2.20446	4.78635	18.7733
Smp_042770	TBC1 domain family 0	-0.444903	-0.800363	1.24527	8	-0.346073	0.556469	2.88675	1.02557e-11	2.54068	3.83531e-09	18.0956	13.2586	97.2868
Smp_146950	basement membrane specific heparan sulfate	0.414406	-1.65731	1.2429	2	-2.64831	0.000520433	3.93527	8.89733e-08	1.28696	0.102711	1.66659	0.205174	3.88012
Smp_079860	o acyltransferase (membrane bound) domain	-0.978343	-0.264279	1.24262	8	1.14232	2.48341e-06	2.1755	2.52132e-21	3.31783	1.68763e-47	87.5284	183.641	781.318
Smp_010690	actin related protein 2:3 complex, subunit 2	-0.495058	-0.747433	1.24249	8	-0.198731	0.836619	2.67213	1.36289e-05	2.4734	7.30708e-05	16.0854	12.9491	85.6709
Smp_098250	hypothetical protein	-0.428348	-0.810579	1.23893	8	-0.38969	0.613546	2.82176	1.51101e-07	2.43207	5.75751e-06	12.1935	8.70885	61.3149
Smp_167000	centrosomal protein of 19 kDa	0.156547	-1.39391	1.23737	2	-2.06881	4.065e-12	3.7596	2.3159e-39	1.69079	4.69576e-11	77.832	17.0629	223.208
Smp_124760	hypothetical protein	0.772767	-2.00862	1.23585	2	-3.3439	0.000123609	3.99033	3.64008e-06	0.646431	0.53503	3.04527	0.191214	4.44256
Smp_161600	sox transcription factor	2.10964	-3.34533	1.23568	15	-5.44229	6.33522e-08	4.28789	3.7134e-05	-1.1544	0.288012	11.9297	0.0529935	4.24224
Smp_010280	monoacylglycerol lipase abhd12	-0.306345	-0.928772	1.23512	8	-0.745646	0.0148242	3.14477	3.59232e-31	2.39913	1.24673e-18	91.1224	51.1858	430.166
Smp_045500	annexin	0.272267	-1.50134	1.22907	2	-2.26159	0.00019131	3.61466	5.126e-10	1.35307	0.0248742	10.4498	1.90288	24.5337
Smp_213700	methyltransferase, putative	-0.8325	-0.395874	1.22837	8	0.769707	0.246043	2.42715	5.42237e-06	3.19685	3.61802e-09	6.52284	10.7146	57.8354
Smp_137520	threonine dehydratase:deaminase	-0.898494	-0.327254	1.22575	8	0.927067	0.0218896	2.2816	6.18335e-11	3.20867	2.58617e-19	23.4335	42.5884	200.121
Smp_154020	ankyrin 2,3:unc44	0.627488	-1.853	1.22551	2	-3.33632	6.13296e-12	4.44376	1.09891e-20	1.10744	0.0396465	30.8978	2.62139	60.5772
Smp_024870	hypothetical protein	0.340931	-1.56591	1.22497	2	-2.48481	3.23033e-05	3.66518	2.5516e-10	1.18037	0.0630388	36.3697	5.61543	75.3193
Smp_094500	choline dehydrogenase, mitochondrial	-0.399531	-0.82158	1.22111	8	-0.459164	0.38398	2.84204	1.01759e-12	2.38288	2.3561e-09	3.99793	2.7051	18.8179
Smp_039130	Niemann Pick C1 protein	-0.181019	-1.03993	1.22094	8	-1.01541	0.148204	3.07417	4.02588e-07	2.05876	0.00121592	44.7852	20.3242	173.839
Smp_182770	hypothetical protein	0.756271	-1.97628	1.22001	2	-3.52937	8.50054e-07	4.3567	6.43528e-10	0.827337	0.348763	51.7857	3.43947	85.871
Smp_156530	peptidylglycine alpha amidating monooxygenase	0.851823	-2.06512	1.2133	2	-3.8821	4.0834e-14	4.54031	3.77861e-19	0.658209	0.289947	96.4429	5.44107	135.189
Smp_200240	universal stress protein	0.616709	-1.82947	1.21276	2	-3.33454	1.52934e-28	4.32598	5.93257e-48	0.991432	0.00170841	558.399	50.6155	973.274
Smp_124740	hypothetical protein	0.786585	-1.99808	1.21149	2	-3.53579	4.93842e-06	4.11617	7.67802e-08	0.580385	0.561219	53.3634	3.25578	73.8639
Smp_126530	v ets erythroblastosis virus E26 oncogene	0.636158	-1.84545	1.20929	2	-3.2552	8.2833e-09	4.12687	1.24913e-13	0.871672	0.130949	12.2939	1.02944	20.2694
Smp_084600	solute carrier family 37	-0.443507	-0.761681	1.20519	8	-0.330199	0.292648	2.79423	2.3422e-30	2.46403	9.3914e-24	69.2785	51.4127	340.108
Smp_194840	Niemann Pick C2 protein	-1.1855	-0.0154071	1.2009	13	1.7946	6.49127e-05	1.69682	0.000120198	3.49142	5.30284e-16	48.6294	165.161	509.105
Smp_026320	hypothetical protein	-0.704174	-0.49346	1.19763	8	0.428337	0.554661	2.54093	1.95046e-06	2.96927	2.935e-08	6.41523	8.42197	47.8608
Smp_145360	spermatogenesis associated protein 18	-0.383491	-0.813726	1.19722	8	-0.425687	0.458589	2.81651	4.98304e-11	2.39083	3.60949e-08	13.6819	9.26567	65.3224
Smp_000160	matrix remodeling associated protein 5	0.802353	-1.99822	1.19587	2	-3.25283	0.000628326	3.8316	4.29232e-05	0.578764	0.643135	21.8922	1.41199	30.2664
Smp_017860	hypothetical protein	-0.791266	-0.403984	1.19525	8	0.692644	0.00329792	2.31915	5.29139e-29	3.01179	1.95178e-46	59.1191	90.1239	422.619
Smp_194420	hypothetical protein	1.39024	-2.58524	1.19499	2	-4.45349	3.8888e-06	4.16693	2.11887e-05	-0.286564	0.824015	3.29011	0.0662796	2.26778
Smp_057130	adiponectin receptor protein 2	-0.565812	-0.620174	1.18599	8	0.0686112	0.903951	2.55014	1.46356e-14	2.61875	4.74413e-15	123.242	120.584	681.5
Smp_104760	hypothetical protein	0.110101	-1.29218	1.18208	2	-1.71842	0.0122337	3.30501	2.09523e-07	1.58659	0.0148831	10.51	2.71026	28.887
Smp_210240	#N/A	0.0256247	-1.2053	1.17968	2	-1.56277	0.000741593	3.49034	3.76878e-16	1.92757	3.72809e-06	32.2495	9.83814	111.764
Smp_139900	lysophosphatidic acid phosphatase type 6	-0.0580055	-1.12141	1.17941	8	-1.35841	0.000208202	3.3321	7.88457e-23	1.97369	1.97064e-09	35.9794	13.0937	127.147
Smp_092950	protein osteopotentia	-0.658128	-0.519742	1.17787	8	0.313525	0.657096	2.44836	8.4586e-07	2.76189	3.23601e-08	6.3263	7.55153	40.2163
Smp_132770	E3 ubiquitin protein ligase RNF19	-0.634596	-0.542171	1.17677	8	0.252965	0.579248	2.58615	7.03692e-16	2.83912	1.36968e-18	36.4171	40.9961	235.878
Smp_012580	hypothetical protein	0.495766	-1.67126	1.17549	2	-2.81257	6.20569e-07	4.01882	2.62255e-13	1.20625	0.025035	6.41833	0.767167	13.5832
Smp_124050	venom allergen-like (VAL) 6 protein	0.0482879	-1.2232	1.17492	2	-1.63346	0.000151785	3.30483	3.66023e-16	1.67136	2.98606e-05	17.026	4.98928	48.9513
Smp_135280	brefeldin A inhibited guanine	-0.166896	-1.00524	1.17213	8	-0.927723	0.368354	3.07108	0.000288871	2.14335	0.0168714	11.2138	5.15328	49.4859
Smp_018980	hypothetical protein	2.5576	-3.72574	1.16814	15	-6.56167	1.19167e-11	4.6024	4.54471e-06	-1.95927	0.0386262	14.5552	0.0276876	2.85592
Smp_055200	Tumor suppressor candidate 3 (protein N33)	-0.48487	-0.683008	1.16788	8	-0.144755	0.791691	2.66557	2.44981e-14	2.52082	1.10731e-12	292	245.525	1506.29
Smp_143800	sodium:chloride dependent neurotransmitter	1.21953	-2.38546	1.16593	2	-4.20794	3.26866e-06	4.05965	9.75773e-06	-0.148292	0.904939	8.20402	0.231536	6.39797
Smp_044000	Bax inhibitor 1	-0.331035	-0.83287	1.16391	8	-0.56056	0.113029	2.92361	1.17861e-22	2.36305	7.31321e-15	1115.38	703.427	5074.95
Smp_008860	phospholipid scramblase 1	-0.100358	-1.06121	1.16157	8	-1.18569	0.00341459	3.18045	1.06376e-17	1.99475	1.43271e-07	117.079	46.3519	415.629
Smp_151620	protocadherin 9	1.52317	-2.68468	1.16151	2	-5.01397	8.40737e-10	4.56166	3.90182e-08	-0.452309	0.632334	6.54215	0.100806	4.08482
Smp_176670	histone H2A	-0.662218	-0.498786	1.161	8	0.305483	0.777069	2.40709	0.000993373	2.71257	0.000218812	3.90782	4.78991	26.4763
Smp_194830	SmKK7	0.283384	-1.43657	1.15318	2	-2.23134	0.000315609	3.61001	1.14657e-09	1.37867	0.0247831	66.7435	12.677	159.878
Smp_162770	lysosome associated membrane glycoprotein	-0.481162	-0.671502	1.15266	8	-0.172887	0.746923	2.5633	6.7657e-14	2.39041	3.5422e-12	14.8421	12.3577	69.9957
Smp_196250	supervillin	0.673091	-1.82233	1.14924	2	-3.22015	5.44907e-07	4.02199	2.09825e-10	0.801837	0.28154	5.99994	0.524065	9.5053
Smp_129050	dynamin 1	-0.601692	-0.54556	1.14725	8	0.235906	0.493853	2.41714	4.64803e-23	2.65305	5.12539e-27	13.7441	15.0864	77.012
Smp_007190	lariat debranching enzyme	-0.71636	-0.430761	1.14712	8	0.551896	0.361753	2.12463	8.77053e-06	2.67652	2.51118e-08	6.76451	9.35935	39.9835
Smp_011680	CD36 class B scavenger receptor	-1.29339	0.14918	1.14421	13	2.14282	3.91835e-10	1.31376	0.00020266	3.45658	5.70768e-25	89.9309	382.688	908.351
Smp_038140	GRIP and coiled coil domain containing protein	-0.232517	-0.910765	1.14328	8	-0.83341	0.242121	2.78772	3.06481e-06	1.95432	0.00170841	21.3275	11.1012	78.9751
Smp_135600	zinc finger protein	0.397413	-1.53912	1.14171	2	-2.45522	0.00071016	3.67938	1.39701e-07	1.22416	0.122487	10.0025	1.5093	21.6616
Smp_039160	hypothetical protein	-0.33041	-0.811033	1.14144	8	-0.526856	0.543335	2.72018	2.65342e-05	2.19333	0.000989957	17.1911	11.0362	75.0063
Smp_125160	smoothened	-0.806798	-0.334303	1.1411	8	0.797853	0.248875	2.10146	0.000369427	2.89931	6.13374e-07	7.2445	12.2112	52.6793
Smp_011270	sj ts4 protein	-0.571512	-0.566469	1.13798	8	0.146573	0.712277	2.42543	1.22817e-20	2.57201	8.71439e-23	99.1996	103.117	522.886
Smp_074650	Schistosoma protein, unknown function	0.0693048	-1.20448	1.13518	2	-1.66978	0.00034851	3.28781	9.43488e-14	1.61803	0.000491807	50.0393	14.3343	140.57
Smp_164810	tyrosine protein kinase Fps85D	0.0353675	-1.17006	1.1347	8	-1.38417	0.154013	2.89769	0.000833933	1.51352	0.113522	6.30405	1.99564	17.5089
Smp_095910	signal recognition particle receptor subunit	0.0810675	-1.21573	1.13467	2	-1.70348	1.50202e-12	3.34969	9.002e-47	1.64621	6.80418e-12	238.743	67.8618	655.811
Smp_045550	annexin	1.24357	-2.37806	1.13449	2	-4.61422	5.38366e-11	4.5059	1.82381e-10	-0.108313	0.914408	30.4656	0.851907	25.0443
Smp_168870	Rootletin	0.647015	-1.77992	1.13291	2	-3.1638	4.8233e-07	4.14554	1.71134e-11	0.981739	0.175754	15.4763	1.43009	28.2887
Smp_051000	coiled coil domain containing protein 132	-0.893523	-0.239109	1.13263	8	1.0464	0.0409796	1.94249	3.61064e-05	2.98889	9.83001e-11	20.4984	41.392	153.428
Smp_136640	programmed cell death protein	-0.496774	-0.634973	1.13175	8	-0.0600993	0.89617	2.54659	2.71923e-21	2.48649	4.12407e-20	371.776	331.92	1866.2
Smp_132850	1 acylglycerophosphocholine O acyltransferase	-0.764084	-0.3647	1.12878	8	0.720618	0.143023	2.10871	6.92766e-07	2.82932	1.88307e-11	46.7909	73.7356	305.12
Smp_169560	subfamily M23B non peptidase ue	-0.489944	-0.635984	1.12593	8	-0.0936242	0.90102	2.58655	7.70132e-09	2.49293	4.14823e-08	12.357	11.0056	63.6824
Smp_143420	#N/A	-0.349274	-0.774334	1.12361	8	-0.421561	0.650448	2.62373	9.88036e-05	2.20217	0.00146967	11.6102	8.11943	50.784
Smp_175050	Fibronectin type III domain containing protein	-0.251775	-0.871369	1.12314	8	-0.66128	0.570515	2.99453	0.000699798	2.33325	0.0108852	1.95311	1.10162	10.2846
Smp_150940	zinc finger protein 608	-1.02735	-0.0955477	1.1229	8	1.28491	0.134552	1.57659	0.0461228	2.8615	0.000205457	1.62894	4.2522	12.4393
Smp_126550	#N/A	-0.56454	-0.55539	1.11993	8	0.123658	0.884059	2.62611	2.96565e-07	2.74976	1.04135e-07	28.64	30.0422	182.176
Smp_138620	microtubule actin cross linking factor 1	0.0205368	-1.14016	1.11962	2	-1.44797	0.0956244	3.25979	2.72285e-05	1.81182	0.029932	2.27633	0.724008	7.99723
Smp_018760	neutral alpha glucosidase AB	-0.625079	-0.493004	1.11808	8	0.314604	0.317185	2.29685	1.14348e-20	2.61145	3.57441e-26	167.926	196.436	912.479
Smp_074830	tubulin polyglutamylase ttll6	0.0319025	-1.14933	1.11742	2	-1.54663	0.025998	3.2141	4.69046e-07	1.66748	0.0131403	5.27656	1.66096	16.0367
Smp_143690	feline leukemia virus subgroup C	0.0659814	-1.17964	1.11366	2	-1.63708	0.00274092	3.06822	2.46633e-09	1.43114	0.00924001	23.9533	7.00572	59.639
Smp_006760	fasting inducible integral membrane protein	-1.69256	0.57919	1.11337	13	3.12979	2.51398e-06	0.662127	0.365027	3.79192	1.20172e-08	2.54241	25.535	37.7173
Smp_177580	#N/A	-0.160797	-0.950391	1.11119	8	-0.945181	0.135659	2.98372	4.72398e-08	2.03854	0.000353752	265.508	126.673	993.502
Smp_020770	dolichyl diphosphooligosaccharide protein	-0.386088	-0.722414	1.1085	8	-0.318383	0.552492	2.66723	6.07086e-12	2.34884	2.76061e-09	492.93	364.667	2262.79
Smp_168560	steroid dehydrogenase	0.206867	-1.31222	1.10535	2	-1.91553	0.0049585	3.3279	2.22742e-07	1.41236	0.0304254	6.1883	1.40699	15.5764
Smp_044750	marvel containing potential lipid	-0.724541	-0.380727	1.10527	8	0.649294	0.123181	2.02236	1.47587e-08	2.67166	8.91173e-14	56.5005	83.8473	325.953
Smp_084830	UDP glucose 6 dehydrogenase	-0.492608	-0.610681	1.10329	8	-0.0311592	0.976016	2.28591	1.5819e-05	2.25475	2.58578e-05	35.1323	32.1723	157.126
Smp_050890	hypothetical protein	-0.474085	-0.625559	1.09964	8	-0.0870552	0.869257	2.48601	4.24096e-15	2.39895	6.81827e-14	34.0324	30.3957	162.365
Smp_129610	malate dehydrogenase	0.598231	-1.69765	1.09942	2	-2.93668	3.05558e-06	3.74778	1.57938e-09	0.811106	0.201118	11.0577	1.17146	17.3724
Smp_022630	testis expressed sequence 2 protein	-0.36419	-0.734728	1.09892	8	-0.381525	0.493821	2.61942	2.66267e-10	2.23789	1.22661e-07	29.3726	21.0738	126.715
Smp_151280	cAMP responsive element binding protein 3	-0.369948	-0.725464	1.09541	8	-0.378492	0.324792	2.63661	1.62292e-18	2.25812	1.23171e-13	58.5	41.7021	252.626
Smp_127820	hypothetical protein	-0.846543	-0.248392	1.09494	8	0.971752	0.0659702	1.83562	0.000137904	2.80737	2.80081e-09	14.4737	27.1865	94.1934
Smp_070640	unc 112 protein	-0.0682086	-1.02526	1.09346	8	-1.18178	0.0768097	2.87005	1.60926e-06	1.68827	0.00843862	57.9595	22.888	175.438
Smp_089570	stress associated endoplasmic reticulum protein	0.064944	-1.15607	1.09113	2	-1.5716	0.00062223	3.26272	4.53031e-14	1.69111	0.000228799	1401.18	427.49	4078.59
Smp_149720	hypothetical protein	0.918516	-2.00457	1.08605	2	-3.98523	1.33531e-19	4.23035	4.97837e-22	0.24512	0.681366	198.589	10.8433	209.696
Smp_024180	placenta specific gene 8 protein	-1.35821	0.272702	1.0855	13	2.41527	2.01711e-07	1.15398	0.0188451	3.56925	5.26644e-15	61.9108	322.761	693.198
Smp_155920	high density lipoprotein receptor (hdl)	-0.847072	-0.238132	1.0852	8	0.96501	0.058748	1.88131	4.70757e-05	2.84632	4.43972e-10	20.6048	39.7277	138.862
Smp_149890	hypothetical protein	-0.273144	-0.81179	1.08493	8	-0.629337	0.15493	2.74771	2.85384e-14	2.11837	3.05208e-09	43.2922	26.0331	170.381
Smp_052290	fibroblast growth factor receptor 1 like	-1.81101	0.726284	1.08473	13	3.27076	0.00116143	0.563305	0.646202	3.83406	0.000134436	0.54458	7.8841	11.444
Smp_163950	hypothetical protein	-0.9279	-0.15515	1.08305	8	1.14724	0.114282	1.65961	0.0141008	2.80685	1.55891e-05	9.1769	20.6951	63.9312
Smp_203170	hypothetical protein	-0.533839	-0.546925	1.08076	8	0.0788741	0.936314	2.30499	8.71449e-05	2.38387	5.73594e-05	120.433	120.566	600.211
Smp_050430	traB domain containing protein	-0.491754	-0.586696	1.07845	8	-0.0189771	0.978047	2.38283	1.23828e-12	2.36386	3.17954e-12	50.7767	46.455	236.003
Smp_159470	hypothetical protein	-1.07026	-0.00598419	1.07625	13	1.58395	0.00198686	1.44761	0.00239676	3.03156	4.2149e-10	7.9865	23.6989	61.1486
Smp_039340	hypothetical protein	-0.109494	-0.96481	1.0743	8	-1.05096	0.135394	2.93353	1.49446e-06	1.88257	0.00286836	17.7172	7.69979	61.5052
Smp_172590	family S10 unassigned peptidase (S10 family)	-0.552644	-0.520724	1.07337	8	0.130184	0.90549	1.93631	0.0051505	2.06649	0.00308812	6.74254	7.01172	27.3421
Smp_139740	signal induced proliferation associated 1	-1.73763	0.66434	1.07329	13	3.10504	9.1225e-05	0.61022	0.526668	3.71525	2.66677e-06	1.49599	16.1016	23.1228
Smp_125850	hypothetical protein	-2.75802	1.68498	1.07303	13	5.36598	1.91887e-09	-0.990919	0.23252	4.37506	2.91314e-06	0.252675	24.3663	10.679
Smp_133700	UDP glucose:glycoprotein glucosyltransferase 1	-0.32545	-0.747009	1.07246	8	-0.443169	0.423382	2.68808	1.96293e-10	2.24491	1.78009e-07	7.69999	5.33971	33.4283
Smp_128810	gpi mannosyltransferase 1	-0.20419	-0.867654	1.07184	8	-0.808836	0.119236	2.91182	4.54551e-11	2.10299	3.26239e-06	16.671	8.75987	65.6628
Smp_213690	hypothetical protein	-0.717068	-0.35458	1.07165	8	0.605483	0.219024	2.05325	6.6789e-07	2.65874	9.67928e-11	14.2414	20.8102	83.898
Smp_171530	alpha parvin	-0.486079	-0.585446	1.07152	8	-0.0299849	0.951693	2.45192	2.17676e-19	2.42193	9.60324e-19	28.7996	26.6224	138.787
Smp_176390	cadherin	1.76641	-2.83724	1.07083	15	-4.6371	NA	3.95834	NA	-0.678759	NA	7.96374	0.0812107	4.03307
Smp_203950	retinol dehydrogenase 11	0.784879	-1.85383	1.06895	2	-3.52922	8.59492e-11	3.9405	2.93144e-13	0.411275	0.560057	121.758	8.58734	144.762
Smp_083380	coiled coil domain containing protein 149	-0.0811356	-0.987026	1.06816	8	-1.1694	5.42435e-05	2.95553	1.81153e-27	1.78613	1.23582e-10	167.738	69.8873	515.672
Smp_077560	Hippocampus abundant transcript 1 protein	-0.639718	-0.426309	1.06603	8	0.439175	0.23834	2.20464	1.26115e-13	2.64382	1.15515e-18	48.5043	61.4213	273.727
Smp_075870	Translocation associated membrane protein 1	-0.852868	-0.212248	1.06512	8	1.06163	6.25809e-05	1.85483	1.99988e-13	2.91646	1.75069e-31	175.694	343.71	1185.27
Smp_140140	tetraspanin CD63 receptor	1.67478	-2.73874	1.06396	15	-4.88516	1.61782e-07	4.03846	2.82262e-05	-0.846698	0.404525	19.9996	0.248193	9.02241
Smp_212490	protein transport protein Sec31A	-0.720595	-0.343026	1.06362	8	0.671935	0.308725	1.87225	0.00070619	2.54418	3.1277e-06	4.90829	7.55432	26.9648
Smp_158600	dolichyl diphosphooligosaccharide protein	-0.604985	-0.45794	1.06293	8	0.352131	0.231767	2.16376	8.26158e-20	2.51589	3.94655e-26	112.461	134.742	570.603
Smp_144770	hypothetical protein	-0.251624	-0.808655	1.06028	8	-0.66462	0.174698	2.61253	2.15474e-10	1.94791	4.19394e-06	31.0021	18.2259	108.611
Smp_008230	ras protein Rab 18	-0.431652	-0.628563	1.06021	8	-0.123038	0.778272	2.42355	3.14261e-18	2.30051	2.81508e-16	168.055	144.135	732.116
Smp_144840	Thioredoxin domain containing protein 4	-0.558085	-0.500978	1.05906	8	0.198363	0.593451	2.23595	1.06673e-17	2.43432	1.55821e-20	244.109	262.48	1176.17
Smp_163360	dystrophin	1.09471	-2.15051	1.0558	2	-4.19993	1.03845e-09	4.37311	1.85079e-10	0.173187	0.864946	8.73188	0.350693	8.89369
Smp_153340	ectonucleotide pyrophosphatase:phosphodiesterase	-0.566669	-0.487147	1.05382	8	0.257193	0.46645	2.13174	3.86353e-16	2.38893	9.69112e-20	116.891	130.564	544.848
Smp_126140	integrin alpha 5	1.87859	-2.93181	1.05322	15	-5.0903	4.5073e-07	4.01411	0.00011966	-1.07619	0.345169	6.34866	0.0541582	2.2963
Smp_126350	NMDA type glutamate receptor 1	0.943477	-1.99403	1.05055	2	-3.88994	1.61918e-13	4.18411	1.27135e-15	0.294164	0.693299	124.259	6.92471	134.366
Smp_154840	hypothetical protein	-0.911573	-0.138957	1.05053	8	1.24483	5.51738e-08	1.73743	9.17059e-16	2.98226	1.7402e-42	77.0458	172.513	543.235
Smp_199770	schwannomin interacting protein	0.414751	-1.46451	1.04975	2	-2.50702	4.33323e-07	3.4893	6.00054e-13	0.982277	0.0721557	61.203	9.67267	109.568
Smp_124930	neuropilin (nrp) and tolloid (tll)	1.031	-2.07981	1.04882	2	-3.90528	2.49895e-07	4.03299	1.08676e-07	0.127713	0.908341	9.34699	0.435796	9.03786
Smp_170110	high density lipoprotein binding protein	-0.781322	-0.267322	1.04864	8	0.874647	0.0705992	1.89047	1.25665e-05	2.76512	1.09531e-10	15.1946	27.0254	95.2907
Smp_155450	SH3 and multiple ankyrin repeat domains protein	0.922235	-1.97046	1.04822	2	-3.6512	6.64429e-07	3.92651	8.66005e-08	0.275307	0.787962	12.2149	0.73602	13.1645
Smp_141290	innexin	-1.2137	0.166658	1.04704	13	2.10405	2.08704e-17	1.24261	8.64675e-07	3.34666	4.40279e-43	65.5668	269.129	600.11
Smp_078800	dnaJ subfamily B	-0.327941	-0.718434	1.04638	8	-0.419017	0.211331	2.59093	1.01405e-21	2.17192	1.94099e-15	156.51	108.772	628.458
Smp_084090	hypothetical protein	1.50033	-2.54547	1.04514	2	-4.99962	2.40996e-10	4.47459	2.53951e-08	-0.52503	0.561571	8.48388	0.150864	5.1128
Smp_134960	peptide (allatostatin:somatostatin)	0.972487	-2.017	1.04451	2	-4.04437	4.51786e-18	4.34226	1.97235e-20	0.29789	0.54376	82.6508	4.26938	90.9585
Smp_100120	er degradation enhancing alpha mannosidase	-0.654042	-0.390206	1.04425	8	0.488779	0.296139	2.01438	9.15082e-08	2.50316	3.31715e-11	24.4617	32.5381	127.394
Smp_151590	Centrosomal protein of 135 kDa (Cep135 protein)	0.574002	-1.61631	1.04231	2	-2.73892	0.00119777	3.22095	0.00011763	0.482028	0.654548	8.77475	1.00862	11.2517
Smp_135060	bollus pemphigoid antigen	-3.61953	2.58133	1.0382	6	7.16534	1.26928e-16	-2.23785	0.000601905	4.92749	6.71165e-08	0.016513	9.31061	1.66338
Smp_071390	adenylate kinase	0.378088	-1.41213	1.03404	2	-2.4278	6.59537e-22	3.5393	3.44194e-46	1.1115	2.53366e-05	1189.01	204.464	2273.5
Smp_198280	#N/A	-0.617999	-0.413258	1.03126	8	0.440323	0.122329	2.10354	1.58093e-19	2.54386	3.45713e-27	31.8829	40.5779	165.795
Smp_162650	anoctamin 10	-0.473325	-0.555031	1.02836	8	0.0334512	0.979015	2.55503	8.68242e-05	2.58848	8.26799e-05	6.64533	6.44377	38.8059
Smp_051080	clathrin light chain	-1.01197	-0.0162211	1.02819	13	1.54886	1.88462e-11	1.56638	3.01096e-12	3.11525	2.97636e-44	125.686	346.495	969.703
Smp_129390	vacuolar protein sorting associated protein 13B	-0.291674	-0.734145	1.02582	8	-0.459683	0.603176	2.64995	4.41806e-05	2.19027	0.000990893	2.36994	1.55677	10.376
Smp_131320	myst histone acetyltransferase	-0.749432	-0.275612	1.02504	8	0.784756	0.237515	1.95898	0.000512865	2.74374	9.14768e-07	4.28238	7.27389	27.4979
Smp_129450	glucose 6 phosphatase 3	0.0457779	-1.06666	1.02088	8	-1.46218	3.05558e-06	3.01657	4.84281e-24	1.55439	2.37455e-07	66.6905	22.3899	173.947
Smp_088310	sesquipedalian 1	-0.346319	-0.667021	1.01334	8	-0.307006	0.380545	2.39274	2.85735e-19	2.08573	9.50026e-15	102.55	77.1303	384.641
Smp_157950	glycogenin	0.843372	-1.85569	1.01231	2	-3.65271	1.09722e-22	3.98555	1.01257e-26	0.332834	0.464111	37.7784	2.63645	41.5216
Smp_157350	serine:threonine protein kinase ULK2	0.269564	-1.28042	1.01086	2	-2.02129	0.000333095	3.10399	1.08169e-08	1.0827	0.0719237	13.0651	2.91178	24.9648
Smp_031730	signal peptidase 18 kDa subunit	-0.552472	-0.455738	1.00821	8	0.267987	0.637622	2.08072	2.78703e-07	2.3487	7.31844e-09	224.833	253.047	1044.93
Smp_145890	adamTS protein 3	0.828129	-1.83454	1.00641	2	-3.43283	6.25951e-06	3.62208	1.83217e-06	0.189255	0.866897	27.888	1.96553	28.9092
Smp_153490	GDP mannose 4,6 dehydratase	-0.97246	-0.031694	1.00415	13	1.46008	0.000407653	1.63226	5.52364e-05	3.09234	3.48018e-15	58.1949	152.647	455.545
Smp_139200	nuclear receptor subfamily 4 group A member	2.21001	-3.21278	1.00277	15	-4.38307	NA	3.00359	NA	-1.37948	NA	4.98017	0.0210606	1.2493
Smp_123060	protein transport protein sec16a	-0.332434	-0.668284	1.00072	8	-0.359126	0.622224	2.34872	8.8189e-06	1.98959	0.000242911	16.5041	11.9038	61.491
Smp_176690	ral guanine nucleotide exchange factor with pH	-0.476942	-0.522577	0.999519	8	0.0452564	0.967412	2.06993	0.000525126	2.11519	0.000455251	5.3539	5.30778	21.7967
Smp_081570	staphylococcal nuclease domain containing protein	-0.750624	-0.247293	0.997917	8	0.841353	0.00272968	1.81498	1.66753e-12	2.65633	5.95778e-25	37.0678	62.531	209.904
Smp_162080	MLX interacting protein	-0.303039	-0.693533	0.996572	8	-0.356657	0.739603	2.406	0.00142391	2.04934	0.00852749	6.48631	4.73765	25.7509
Smp_210130	C Jun amino terminal kinase interacting protein	0.684533	-1.6776	0.993064	2	-3.07012	1.58473e-07	3.65289	2.63642e-10	0.582766	0.433014	50.0223	5.00856	66.4793
Smp_124600	hypothetical protein	-0.255866	-0.736832	0.992698	8	-0.512558	0.565249	2.17395	0.0013881	1.66139	0.0185086	4.19977	2.72591	12.4294
Smp_050390	aldehyde dehydrogenase	-0.19098	-0.798091	0.989071	8	-0.738845	0.0163813	2.57877	9.64578e-21	1.83993	8.80483e-11	519.411	292.369	1649.82
Smp_166300	hypothetical protein	0.964624	-1.9532	0.988579	2	-3.99242	7.47754e-26	4.13856	9.85839e-28	0.146142	0.791163	187.188	10.496	183.147
Smp_149780	synaptotagmin protein	-0.963426	-0.0234044	0.98683	13	1.40477	0.00440255	1.42619	0.00303669	2.83096	1.25986e-09	57.7042	149.68	388.081
Smp_155420	thioredoxin domain containing protein 11	-0.429748	-0.555825	0.985573	8	-0.0649005	0.902435	2.23346	4.872e-13	2.16856	3.95616e-12	46.3211	41.7002	187.233
Smp_131310	hypothetical protein	-0.738646	-0.241893	0.980538	8	0.792592	0.317886	1.95359	0.00361308	2.74618	3.11967e-05	2.77993	4.68934	18.3468
Smp_196480	hypothetical protein	-0.288667	-0.691751	0.980418	8	-0.398469	0.6495	2.43244	0.000113335	2.03397	0.00155121	27.0074	19.1486	104.746
Smp_097810	Ubiquitin thioesterase otubain protein	-0.227521	-0.752865	0.980386	8	-0.633776	0.00699064	2.5455	1.59658e-33	1.91173	2.84665e-19	248.653	150.178	831.804
Smp_210070	integrator complex subunit	-0.696227	-0.282501	0.978728	8	0.706002	0.374126	1.88435	0.004661	2.59035	7.102e-05	7.26976	11.7188	41.9124
Smp_181050	hypothetical protein	-0.782119	-0.196457	0.978576	8	0.960217	0.083629	1.69264	0.000901242	2.65285	9.11607e-08	19.877	37.3705	117.467
Smp_097620	vacuolar protein sorting associated protein 25	-0.414289	-0.561701	0.97599	8	-0.0690912	0.920088	2.19146	1.29213e-07	2.12237	4.45508e-07	226.785	200.298	895.719
Smp_164380	protein KINase family member (kin 1)	1.21569	-2.18907	0.973381	2	-4.60006	2.11134e-19	4.38778	1.12569e-17	-0.212284	0.762599	90.2304	3.0177	68.7796
Smp_023940	golgin subfamily a member	-0.251864	-0.719552	0.971416	8	-0.547062	0.436099	2.43948	9.50562e-06	1.89242	0.000903031	11.361	7.18779	39.6702
Smp_068530	syntenin 1	-0.713527	-0.257764	0.971291	8	0.740763	0.0861241	1.61318	3.05449e-05	2.35394	6.73261e-10	82.6586	131.497	386.368
Smp_202980	hypothetical protein	-0.0879702	-0.882821	0.970791	8	-0.987678	0.0680097	2.66097	2.72734e-08	1.67329	0.000693651	120.923	55.7973	349.61
Smp_124410	fatty acid amide hydrolase	0.480307	-1.44425	0.96394	2	-2.52035	3.03201e-06	3.32499	3.67511e-10	0.804639	0.171498	19.1094	2.98591	29.8419
Smp_144600	guanine nucleotide exchange factor	0.0527598	-1.01565	0.96289	8	-1.37506	0.0188909	2.75097	4.05489e-07	1.37591	0.0175786	7.05935	2.45023	16.8834
Smp_062070	sulfide quinone reductase	-0.0401146	-0.922769	0.962883	8	-1.13166	0.000962907	2.73354	1.26491e-17	1.60188	1.61181e-06	332.132	141.016	903.803
Smp_157980	hypothetical protein	-0.506337	-0.454823	0.961159	8	0.192603	0.803676	1.90216	0.000210399	2.09477	4.7288e-05	6.62352	7.27196	26.3206
Smp_178360	E3 UFM1 protein ligase 1	-0.468618	-0.491525	0.960144	8	0.0833892	0.890541	2.1425	2.9227e-09	2.22589	1.02452e-09	19.4732	19.5288	82.9209
Smp_105680	dolichyl diphosphooligosaccharide protein	-0.539831	-0.4172	0.957031	8	0.301662	0.517202	1.96073	1.43454e-08	2.26239	6.54489e-11	267.596	308.789	1166.04
Smp_049170	alpha endosulfine	-0.143681	-0.813314	0.956995	8	-0.787641	0.0786786	2.54247	8.50695e-11	1.75483	1.4933e-05	285.18	152.63	868.875
Smp_090890	proto oncogene serine:threonine protein kinase	-0.219862	-0.734252	0.954114	8	-0.520478	0.496931	2.21499	0.000192332	1.69451	0.00625308	18.5619	11.6679	55.3609
Smp_015090	coatomer subunit beta'	-0.433891	-0.51573	0.949622	8	0.00237171	1	2.10388	1.75986e-08	2.10625	2.49904e-08	78.5702	74.065	307.023
Smp_168930	golgi autoantigen, golgin subfamily a, 5	-0.316973	-0.630211	0.947184	8	-0.294442	0.72464	2.50249	1.27824e-05	2.20804	0.000156829	7.95086	6.0846	34.9528
Smp_141010	dysferlin1	-0.422608	-0.52457	0.947178	8	-0.000967982	1	2.05306	5.69217e-06	2.05209	7.09835e-06	8.22449	7.72059	31.3404
Smp_157380	hypothetical protein	0.964058	-1.91115	0.947091	2	-3.77111	1.69013e-09	3.74743	2.64317e-09	-0.0236775	0.984934	5.18219	0.301181	4.54343
Smp_164130	protein dopey 1	-0.379386	-0.563755	0.943141	8	-0.0907704	0.923755	2.25458	9.51543e-05	2.16381	0.000223081	2.51856	2.19061	10.5206
Smp_000755	family M13 non peptidase ue (M13 family)	0.518707	-1.4607	0.941994	2	-2.45828	0.00531321	2.90532	0.000825955	0.447042	0.697131	9.30103	1.35455	11.7191
Smp_104270	ectonucleotide pyrophosphatase:phosphodiesterase	-0.569245	-0.370601	0.939846	8	0.441131	0.472354	2.01365	1.5819e-05	2.45479	1.63697e-07	8.41823	10.842	42.5685
Smp_085540	myosin heavy chain	0.764389	-1.70137	0.936983	2	-3.33492	6.79008e-09	3.55829	4.69562e-10	0.223372	0.793681	152.097	12.751	161.131
Smp_172390	UDP galactose transporter	-0.234667	-0.701701	0.936368	8	-0.543094	0.0702698	2.34518	8.28726e-20	1.80209	4.75325e-12	17.3917	11.276	54.2777
Smp_194740	G protein coupled receptor fragment	1.30248	-2.2363	0.933818	2	-4.24572	3.53008e-06	3.83119	3.55314e-05	-0.414525	0.746744	87.4913	2.7859	54.8319
Smp_189490	matrix remodeling associated protein 5	-0.228716	-0.699958	0.928673	8	-0.447938	0.693541	2.04319	0.0157573	1.59525	0.074311	9.76192	6.56728	28.611
Smp_066290	#N/A	-0.696591	-0.227706	0.924297	8	0.727771	0.489786	1.66222	0.0580654	2.38999	0.005327	5.4556	9.27047	29.6616
Smp_137020	phosphatidylinositol transfer protein alpha	0.0707022	-0.993747	0.923045	4	-1.26336	0.097239	2.52775	0.000251258	1.26439	0.0913071	14.2487	5.06505	30.9569
Smp_138630	hypothetical protein	0.267939	-1.18976	0.921824	2	-1.83564	0.0124044	3.01827	1.39049e-05	1.18263	0.121892	15.634	3.773	33.4799
Smp_163550	hypothetical protein	1.93818	-2.8592	0.921025	15	-5.40087	4.44248e-09	4.10229	1.80004e-05	-1.29858	0.165193	16.7588	0.134328	5.69892
Smp_123165	Dynactin subunit 4	-0.422271	-0.498711	0.920982	8	0.042768	0.951729	1.98688	1.58988e-06	2.02965	1.17958e-06	72.0362	69.3278	266.851
Smp_022070	hypothetical protein	0.691284	-1.61095	0.919667	2	-3.10572	1.15642e-14	3.66425	7.00322e-20	0.558524	0.175506	66.6054	6.83616	88.4755
Smp_138440	ubiquitin ligase E3	0.331646	-1.25122	0.919573	2	-1.80606	0.0741352	3.10503	0.000927511	1.29897	0.220851	2.97213	0.638542	7.09006
Smp_212170	hypothetical protein	-0.188901	-0.728561	0.917462	8	-0.57642	0.546306	2.23216	0.00245603	1.65574	0.0316198	3.50539	2.14053	10.5045
Smp_151020	transmembrane protein 17	0.232417	-1.14717	0.914756	2	-1.75742	0.000296896	2.90003	4.74342e-10	1.14261	0.0241092	86.3745	22.6807	170.493
Smp_043220	hypothetical protein	0.306316	-1.21851	0.91219	2	-2.02832	1.04751e-14	2.99258	2.58675e-31	0.96426	0.000506424	803.31	181.672	1371.77
Smp_152380	hypothetical protein	1.38598	-2.29728	0.911302	2	-4.49731	7.53764e-08	4.152	8.59726e-07	-0.34531	0.770728	83.4065	2.19271	55.7153
Smp_214200	rhoptry protein	-0.483769	-0.425352	0.90912	8	0.200132	0.742925	1.8267	1.1185e-05	2.02683	1.17593e-06	53.0369	57.6256	197.648
Smp_029470	thimet oligopeptidase	0.161069	-1.0688	0.907736	2	-1.59624	0.00013455	2.85634	7.78105e-13	1.2601	0.00175551	11.4775	3.43454	24.631
Smp_145400	dynein heavy chain	-1.54684	0.6393	0.907539	13	3.16505	1.43715e-09	0.324287	0.608413	3.48934	4.0381e-11	3.74257	35.5435	41.0957
Smp_157240	cyclin dependent kinase 1	0.773187	-1.68013	0.906942	2	-3.21726	2.61346e-08	3.50364	1.06909e-09	0.286387	0.725689	76.9012	7.02156	83.838
Smp_165700	USP6 N terminal protein	-0.132362	-0.773119	0.905481	8	-0.650171	0.571385	2.16237	0.0169451	1.5122	0.12104	8.96044	5.10422	24.8096
Smp_085290	Tropomyosin 1,s 9A:A:B	-0.839537	-0.0630823	0.902619	13	1.22715	0.00712703	1.3735	0.00215033	2.60065	1.32276e-09	120.209	269.896	678.742
Smp_063030	hypothetical protein	-1.20514	0.303283	0.901857	13	2.08651	0.0119919	0.749796	0.430073	2.83631	0.000482044	6.39369	30.7258	48.2473
Smp_028080	serine palmitoyltransferase 1	-0.405731	-0.495601	0.901332	8	-0.00752705	0.995637	2.03502	2.47717e-07	2.02749	3.60703e-07	17.1454	15.9829	63.2306
Smp_139350	hypothetical protein	0.617505	-1.51875	0.90124	2	-2.6832	0.00095712	3.25884	4.5229e-05	0.575633	0.574309	8.05874	1.02233	11.101
Smp_199210	plasma membrane calcium transporting ATPase	-0.390944	-0.510205	0.901148	8	-0.0468069	0.950385	1.99178	6.3311e-06	1.94497	1.31987e-05	35.9136	32.634	125.851
Smp_148790	laminin subunit beta 1	-0.67564	-0.224705	0.900345	8	0.647956	0.470542	1.70591	0.0191502	2.35386	0.0010799	1.37535	2.13201	6.99565
Smp_101290	actin protein 2, arp2	-0.229242	-0.670689	0.899931	8	-0.497107	0.0570603	2.20337	1.897e-22	1.70626	1.144e-13	186.157	122.551	538.446
Smp_024390	microsomal signal peptidase 25 kDa subunit	-0.386181	-0.512991	0.899172	8	-0.0531116	0.939832	2.09797	4.15298e-07	2.04486	1.10112e-06	250.359	224.141	937.432
Smp_143530	#N/A	0.271136	-1.1693	0.898167	2	-1.87921	0.00104156	2.79182	4.53563e-07	0.912617	0.148247	14.2988	3.42835	24.3638
Smp_056560	cyclic nucleotide gated cation channel	1.04924	-1.94721	0.897962	2	-3.68866	6.65485e-06	3.54463	1.9544e-05	-0.144023	0.903166	19.2584	0.982388	15.32
Smp_149770	5 hydroxytryptamine receptor 1A	2.26614	-3.16131	0.895173	15	-5.36683	2.59643e-07	3.68857	0.000808479	-1.67826	0.121589	21.9844	0.103912	5.14624
Smp_136550	tyrosine protein kinase transmembrane receptor	-1.81389	0.918796	0.895089	10	3.65064	1.12273e-05	-0.254291	0.828633	3.39635	6.24743e-05	1.13681	18.8994	14.5027
Smp_013970	#N/A	-4.66351	3.7703	0.89321	6	7.44789	3.2764e-14	-4.01099	4.90707e-07	3.43689	0.00217911	0	52.4806	2.19654
Smp_166110	staphylococcal nuclease domain containing protein	-0.777685	-0.113363	0.891047	8	1.09474	0.00103261	1.38691	1.40641e-05	2.48165	3.02029e-15	33.9744	68.2766	171.317
Smp_027870	melanoma inhibitory activity protein 3	-0.396741	-0.493145	0.889885	8	0.00522435	0.999816	1.93493	0.000303355	1.94016	0.000345712	18.1827	17.2912	64.4584
Smp_126740	scy1 protein 2	-0.289998	-0.598503	0.888501	8	-0.291326	0.717889	2.17276	0.000123437	1.88143	0.00120838	32.6952	24.9307	112.716
Smp_001040	kinesin heavy chain	0.0851625	-0.972669	0.887507	4	-1.34329	0.0274821	2.61704	3.56804e-06	1.27375	0.0412641	194.949	69.3273	435.958
Smp_212960	syntaxin-18	-0.389285	-0.496524	0.88581	8	0.0100904	0.997078	2.08222	0.00150208	2.09231	0.00161561	6.18974	5.77433	25.4898
Smp_165890	rab6 interacting protein 2:elks:erc:cast	0.89497	-1.7768	0.881829	2	-3.32906	6.71055e-05	3.29915	9.50148e-05	-0.029905	0.985909	11.7985	0.809456	10.3836
Smp_093930	Receptor Tyrosine Kinase, putative	-0.217404	-0.664269	0.881673	8	-0.466524	0.535303	2.16316	0.000156617	1.69664	0.00437164	15.6891	10.6407	46.3814
Smp_168730	carbonic anhydrase	0.810125	-1.68808	0.877952	2	-3.43522	2.15039e-33	3.67574	6.90173e-38	0.240521	0.506387	195.671	16.4725	203.756
Smp_156150	small conductance calcium activated potassium	0.969623	-1.84629	0.876668	2	-3.64306	3.07097e-07	3.63014	4.55418e-07	-0.0129264	0.994571	7.10013	0.426562	6.2607
Smp_068120	aryl hydrocarbon receptor interacting	-0.238496	-0.636853	0.875348	8	-0.460788	0.324747	2.17946	5.68168e-09	1.71868	7.29634e-06	45.404	31.1785	135.333
Smp_097280	hypothetical protein	-0.505451	-0.369887	0.875338	8	0.287726	0.60721	1.84968	3.64008e-06	2.1374	1.10821e-07	18.5134	21.5098	74.6642
Smp_012010	forkhead box subgroup O	-0.435567	-0.438887	0.874454	8	0.117927	0.852047	1.93314	1.07741e-06	2.05107	2.76896e-07	18.0168	18.7225	67.4021
Smp_150770	teneurin	0.0546728	-0.926394	0.871722	4	-1.16603	0.21811	2.50611	0.00270365	1.34008	0.149915	6.88381	2.72764	16.4519
Smp_201470	hypothetical protein	-0.128416	-0.742349	0.870765	8	-0.693774	0.193575	2.31494	3.11437e-07	1.62117	0.000561951	280.841	157.424	772.316
Smp_179610	GTPase activating protein ZNF289	-0.208789	-0.661435	0.870224	8	-0.530254	0.229942	2.18989	2.1469e-09	1.65964	1.07072e-05	154.641	100.269	438.427
Smp_048540	dolichol kinase	-0.457614	-0.409062	0.866676	8	0.2537	0.675825	1.91391	7.66272e-06	2.16761	4.30901e-07	47.6985	52.4662	192.825
Smp_045780	ubiquitin modifier activating enzyme 5	-0.156645	-0.707866	0.864511	8	-0.648291	0.347918	2.3801	2.13997e-05	1.73181	0.00275146	11.5061	6.776	35.6391
Smp_071970	chloride channel protein 3	0.177051	-1.04104	0.863989	4	-1.56536	4.8753e-05	2.84999	1.00523e-14	1.28463	0.000903031	32.893	10.1859	71.0142
Smp_018360	pi plc x domain containing protein 3	-0.471167	-0.389441	0.860608	8	0.234505	0.553602	1.75324	1.15333e-09	1.98774	6.24166e-12	172.667	191.19	614.613
Smp_078710	hypothetical protein	-0.239841	-0.618437	0.858279	8	-0.435506	0.33728	2.23008	5.76762e-10	1.79457	1.0975e-06	30.0937	21.0634	94.411
Smp_036220	histone H2B	-0.183213	-0.67485	0.858064	8	-0.550518	0.272796	2.25716	4.07247e-08	1.70664	5.98193e-05	632.091	402.074	1845.23
Smp_158430	hepatotoxic ribonuclease omega 1	-0.676168	-0.18023	0.856398	8	0.832799	0.0192475	1.57261	1.30701e-06	2.40541	1.01343e-13	40.5393	68.22	194.595
Smp_032640	thiamin pyrophosphokinase 1	-0.186504	-0.669768	0.856273	8	-0.536658	0.222399	2.18447	1.76648e-09	1.64781	8.53609e-06	97.8387	63.0063	272.62
Smp_145420	plexin A3	-0.721723	-0.133394	0.855117	8	1.01021	0.0100776	1.47449	7.16978e-05	2.48469	8.56786e-12	5.50591	10.5025	27.873
Smp_140740	hypothetical protein	-0.0888604	-0.766245	0.855106	8	-0.805626	0.305072	2.56428	7.81443e-05	1.75865	0.00895429	13.7765	7.2741	44.8209
Smp_170280	integrin alpha ps	-1.81604	0.962815	0.853223	13	3.93092	1.01055e-15	-0.119509	0.867431	3.81141	1.4196e-14	1.74428	28.2006	24.0388
Smp_203560	hypothetical protein	0.0326817	-0.884328	0.851646	8	-1.11975	0.0520247	2.44467	3.01218e-06	1.32491	0.0171809	162.128	68.2179	367.478
Smp_136480	CCAAT box DNA binding protein subunit B	1.26711	-2.11678	0.84967	2	-4.45311	8.07852e-12	3.86865	3.9484e-09	-0.584469	0.4909	207.098	7.26251	120.458
Smp_091460	glutamine synthetase	0.729925	-1.57947	0.849544	2	-3.16449	1.98459e-19	3.36569	4.9365e-22	0.201199	0.689043	1093.4	110.409	1115.6
Smp_150280	leucine rich repeats containing F box	-0.557631	-0.291489	0.84912	8	0.48638	0.609926	1.57595	0.0355133	2.06233	0.00536046	21.3474	29.5309	85.2815
Smp_147120	DDRGK domain containing protein 1	-0.141311	-0.706728	0.848039	8	-0.665856	0.00836744	2.25377	5.02162e-23	1.58791	7.58077e-12	160.002	93.6615	424.857
Smp_070610	mps one binder kinase activator 1	-0.105037	-0.742663	0.8477	8	-0.746182	0.123838	2.16123	2.89881e-07	1.41504	0.0011822	34.8018	19.4529	83.4066
Smp_073590	GTP binding protein	-0.272344	-0.574089	0.846433	8	-0.296983	0.560623	2.05473	4.31733e-08	1.75774	4.6574e-06	578.528	438.352	1753.98
Smp_199390	carbohydrate-binding calcium-dependent lectin	-0.33804	-0.505196	0.843236	8	-0.043569	0.978824	1.87095	0.0379965	1.82738	0.0488982	12.3483	11.4041	43.3187
Smp_042790	dolichol phosphate mannosyltransferase	-0.424057	-0.416787	0.840844	8	0.116312	0.803878	1.85496	3.83189e-10	1.97127	4.27262e-11	61.0293	62.3922	214.981
Smp_133790	small g protein signaling modulator 3	0.064547	-0.905356	0.840809	4	-1.19338	0.0228829	2.39823	7.86682e-07	1.20486	0.0226559	50.2562	20.1666	103.079
Smp_159620	BTB:POZ domain containing protein KCTD20	-0.318168	-0.522559	0.840727	8	-0.133298	0.891635	1.84952	0.00296411	1.71622	0.0071937	12.9107	11.0853	39.1062
Smp_092320	RNA polymerase II elongation factor ELL	0.105893	-0.946515	0.840622	4	-1.32146	0.02055	2.42649	5.35242e-06	1.10503	0.0624968	56.5862	20.2265	111.581
Smp_144290	hypothetical protein	0.256097	-1.09544	0.839342	4	-1.65047	0.0556741	2.40343	0.00335285	0.752965	0.446144	7.47387	1.97583	11.4166
Smp_135010	oxalate:formate antiporter	0.322718	-1.16163	0.838916	2	-2.00014	6.41422e-12	2.80552	1.07561e-22	0.805374	0.00997681	193.062	44.3951	297.374
Smp_172990	leucine rich repeat containing protein 68	0.0353991	-0.874294	0.838895	4	-1.04364	0.240063	2.21476	0.00466915	1.17112	0.180136	13.8942	5.89496	28.7128
Smp_191010	clathrin heavy chain	-0.103501	-0.735317	0.838818	4	-0.667062	0.554393	1.99552	0.0270822	1.32845	0.177693	33.5148	19.3402	79.6235
Smp_125480	synaptopodin 2 protein like	1.63275	-2.47149	0.838738	15	-4.55897	1.25942e-05	3.39784	0.00180861	-1.16113	0.339589	16.0048	0.264425	5.57747
Smp_021920	paramyosin	1.02996	-1.86609	0.836129	2	-3.90838	1.11799e-12	3.64084	3.97031e-11	-0.267537	0.732764	85.2239	4.75397	63.0746
Smp_153180	striated muscle preferentially expressed protein	1.23023	-2.06619	0.835966	15	-4.03833	2.13967e-05	3.41282	0.000440292	-0.625511	0.617955	24.5497	0.89945	13.5628
Smp_173540	integrin alpha ps	0.112346	-0.948296	0.83595	4	-1.18762	0.244772	2.17982	0.0169171	0.992193	0.349019	14.766	5.56556	27.4751
Smp_170380	hypothetical protein	-1.48963	0.655046	0.834589	13	3.14659	1.07662e-17	0.211256	0.658887	3.35785	9.37831e-20	12.976	111.616	122.337
Smp_130440	protein MICAL 3	-0.258528	-0.574721	0.833249	8	-0.305557	0.596657	2.03401	1.44245e-06	1.72845	6.35982e-05	23.4151	17.6173	69.751
Smp_155050	agrin	0.904402	-1.7374	0.832995	2	-3.5068	7.80075e-11	3.60237	2.38971e-11	0.0955721	0.90735	13.6943	1.0242	12.9121
Smp_070020	rhoptry associated membrane antigen	1.148	-1.9809	0.832893	2	-4.01537	4.14277e-08	3.75211	3.6134e-07	-0.263263	0.805354	40.8558	1.85079	29.8895
Smp_054160	glutathione S-transferase class-mu 28 kDa isozyme	-1.49099	0.658474	0.83252	13	3.11688	5.97234e-14	0.300357	0.582401	3.41723	1.78416e-16	1453.03	12487.5	14528.4
Smp_136530	Palmitoyltransferase ZDHHC17	-0.126758	-0.704863	0.831621	8	-0.611924	0.409225	2.19837	0.000212215	1.58644	0.00966226	6.0051	3.53475	16.4156
Smp_131190	Diacylglycerol kinase zeta	0.249109	-1.07988	0.830772	4	-1.68925	0.00346901	2.69153	1.14418e-06	1.00228	0.0972297	6.77707	1.86457	12.3306
Smp_038440	heart specific myosin light chain phosphatase	1.31853	-2.14923	0.830704	2	-4.38597	5.18583e-08	3.76386	4.4993e-06	-0.622111	0.547026	91.5143	2.96989	50.7541
Smp_163210	echinoderm microtubule associated protein	0.312857	-1.14334	0.830483	4	-1.84566	0.00106053	2.70409	6.67276e-07	0.858432	0.179598	97.7822	24.1149	157.869
Smp_196130	salivary selenoprotein	-0.351811	-0.478572	0.830383	8	-0.0338598	0.961594	1.92795	6.97988e-07	1.89409	1.46596e-06	691.72	627.921	2305.25
Smp_074700	Translocon associated protein subunit gamma	-0.191556	-0.637907	0.829462	8	-0.493044	0.255668	2.16175	1.15563e-09	1.6687	5.05326e-06	355.995	234.6	1007.14
Smp_036950	hypothetical protein	-1.01091	0.18241	0.828502	13	1.79162	0.000516181	1.17819	0.0263024	2.96981	2.68812e-09	8.78034	29.5808	65.0163
Smp_016600	solute carrier family 1	1.11722	-1.94571	0.828495	2	-4.0742	8.44632e-12	3.93686	4.43143e-11	-0.137346	0.880301	88.1084	4.24244	70.5781
Smp_213500	acyl coenzyme A thioesterase	-0.22294	-0.603798	0.826738	8	-0.410328	0.619818	2.20938	0.000278994	1.79906	0.00400462	12.3786	8.60767	40.5395
Smp_090520	purine nucleoside phosphorylase	-0.374314	-0.451858	0.826173	8	0.00415319	0.999816	1.85395	1.11024e-05	1.8581	1.29151e-05	46.5958	43.4833	153.598
Smp_141860	protein furry	-0.410449	-0.413959	0.824409	8	0.123081	0.894636	1.88804	0.00125633	2.01113	0.000642442	4.12984	4.36435	15.4313
Smp_125440	FERM domain containing protein 5	0.844664	-1.66799	0.823322	2	-3.06884	0.00040924	3.21945	0.000208691	0.150613	0.907762	18.1127	1.60222	18.1971
Smp_186680	Rho GTPase activating protein 1	-0.139916	-0.682233	0.822149	8	-0.639182	0.213304	2.2789	1.01345e-07	1.63972	0.000166767	44.3019	26.6733	126.733
Smp_152350	potassium voltage gated channel subfamily H	-0.565499	-0.255504	0.821003	8	0.609843	0.435298	1.39103	0.0336555	2.00087	0.0018107	5.65509	8.26915	21.0208
Smp_142650	hypothetical protein	-0.693915	-0.126736	0.820651	8	0.927465	0.0546089	1.344	0.00315486	2.27146	2.27474e-07	23.799	44.1267	105.075
Smp_157360	E3 ubiquitin protein ligase synoviolin B	-0.385991	-0.434503	0.820495	8	0.0623528	0.935941	1.76382	0.000163569	1.82617	0.000107117	233.44	227.994	755.668
Smp_034500	Dual specificity protein phosphatase 10	-0.416075	-0.404207	0.820282	9	0.120905	0.916295	1.39938	0.0687628	1.52029	0.0515324	14.2999	14.6052	39.3307
Smp_053820	preprotein translocase secy subunit (sec61)	-0.112325	-0.707894	0.820219	8	-0.710187	0.130449	2.21158	5.25728e-08	1.50139	0.000425413	494.421	278.612	1256.07
Smp_164340	Afadin	0.891648	-1.71069	0.819044	2	-3.38854	5.97013e-07	3.52141	2.51828e-07	0.132873	0.89285	4.35911	0.33417	4.33888
Smp_088650	ADP ribosylation factor 4	-0.158728	-0.660196	0.818925	8	-0.512532	0.550677	2.12879	0.00128185	1.61626	0.02019	291.105	187.607	810.773
Smp_127650	Secretory carrier associated membrane protein 2	-0.0852581	-0.73355	0.818808	8	-0.761612	0.0385824	2.14961	6.89467e-11	1.388	5.20197e-05	181.581	98.4113	423.991
Smp_132080	Sugar transporter	-0.534357	-0.284087	0.818443	8	0.477308	0.2538	1.62105	2.23365e-06	2.09836	1.04509e-09	17.0957	22.3642	65.7436
Smp_019060	sec61 beta subunit	-0.350603	-0.466835	0.817438	8	-0.0338055	0.972263	1.90392	0.000240625	1.87011	0.000377295	267.703	243.39	897.348
Smp_207070	ethanolamine phosphate cytidylyltransferase	-0.642482	-0.174671	0.817153	8	0.81116	0.0444705	1.30593	0.000524239	2.11709	7.88019e-09	40.0324	66.1085	155.819
Smp_014270	hypothetical protein	-1.38413	0.567272	0.816861	13	2.76716	3.57489e-06	0.484609	0.463417	3.25177	7.02707e-08	7.35752	52.2194	71.5779
Smp_153170	striated muscle specific	0.723207	-1.5398	0.816588	2	-3.07402	1.18387e-09	3.26675	1.27105e-10	0.192736	0.780818	3.79571	0.392117	3.87744
Smp_179590	dual 3',5' cyclic AMP and GMP phosphodiesterase	-0.132588	-0.683055	0.815643	8	-0.623991	0.226139	2.06707	1.98859e-06	1.44308	0.00139295	13.482	8.15193	32.8317
Smp_129670	apoptosis stimulating of P53	0.111626	-0.926011	0.814385	4	-1.30585	0.0608012	2.47751	0.000109855	1.17166	0.0999381	7.10889	2.59972	14.7538
Smp_028730	GDP mannose pyrophosphorylase B	-0.24186	-0.572442	0.814302	8	-0.352117	0.409225	2.03206	7.11729e-10	1.67994	6.36317e-07	134.723	98.8226	387.398
Smp_129400	Vacuolar protein sorting associated protein	0.0395485	-0.852057	0.812509	4	-1.08434	0.279155	2.19158	0.0128676	1.10724	0.262726	1.581	0.654171	3.24081
Smp_157020	titin	0.903704	-1.71455	0.810847	2	-3.41185	5.02359e-06	3.14579	3.55629e-05	-0.266061	0.799842	2.4682	0.173509	1.80968
Smp_155030	lisH domain and HEAT repeat containing protein	-0.390549	-0.419578	0.810127	8	0.0838656	0.941275	1.56599	0.0319778	1.64986	0.0261585	5.27395	5.35731	15.6275
Smp_171600	hypothetical protein	-0.152626	-0.657133	0.809759	8	-0.581209	0.436763	2.18519	0.000234544	1.60398	0.0093344	13.2188	8.1644	37.3504
Smp_038640	hypothetical protein	-0.601435	-0.20815	0.809585	8	0.623699	0.288876	1.60434	0.00135349	2.22804	5.69023e-06	30.071	44.6537	131.453
Smp_010670	tegumental protein	-0.18296	-0.626185	0.809146	8	-0.484435	0.6495	1.92995	0.0176847	1.44551	0.0963355	33.2793	22.0114	89.0197
Smp_181010	integrin alpha ps	-0.0325674	-0.776092	0.808659	8	-0.904069	0.0746712	2.31136	2.92683e-07	1.40729	0.00233367	17.7696	8.83521	42.8007
Smp_090240	jnk:sapk associated protein	-0.0784872	-0.729758	0.808245	8	-0.821011	0.0252015	2.22925	1.68278e-11	1.40824	4.29904e-05	57.8433	30.8313	137.223
Smp_100040	hypothetical protein	-0.174519	-0.633294	0.807814	8	-0.525897	0.0554999	2.05379	8.6159e-18	1.5279	3.80624e-10	432.473	279.183	1098.35
Smp_161120	metastasis suppressor protein 1	0.126366	-0.93304	0.806673	4	-1.25188	0.139504	2.25894	0.00343114	1.00706	0.256466	25.3213	9.38357	46.406
Smp_140110	primary ciliary dyskinesia protein 1	0.548317	-1.35432	0.806002	2	-2.47043	0.000738528	3.02758	2.60048e-05	0.557149	0.546496	13.5009	2.05405	18.2663
Smp_017610	amiloride sensitive amine oxidase	1.04707	-1.85196	0.804881	2	-3.56827	2.03544e-05	3.53469	2.89499e-05	-0.0335788	0.983219	13.5571	0.81172	11.5881
Smp_159590	hypothetical protein	0.804728	-1.60805	0.803324	2	-3.20685	4.52545e-09	3.27437	2.29498e-09	0.0675188	0.937115	40.2903	3.72506	37.6796
Smp_181260	hypothetical protein	-0.352227	-0.448701	0.800927	8	0.04244	0.978048	1.88706	0.0255605	1.9295	0.0250284	2.97842	2.91874	11.014
Smp_055870	vesicleassociated membrane protein	0.0375392	-0.838297	0.800757	4	-1.06081	0.169101	2.30529	0.00076672	1.24449	0.0908238	14.7621	6.28209	32.1122
Smp_159150	hypothetical protein	0.00405872	-0.804125	0.800067	4	-1.01954	0.0314802	2.18816	4.91681e-07	1.16861	0.0126728	37.499	17.095	75.9254
Smp_038030	adenylosuccinate lyase	-0.202327	-0.59665	0.798977	8	-0.411858	0.167613	2.01205	3.49774e-16	1.60019	1.46757e-10	41.6201	29.1546	111.548
Smp_201030	lung cancer oncogene 5	1.37436	-2.17275	0.798398	2	-4.87179	7.5282e-43	4.16043	9.76916e-31	-0.711354	0.044342	606.123	18.0573	321.735
Smp_164500	golgi resident protein gcp60	-0.311181	-0.48707	0.798252	8	-0.0998233	0.837867	1.89577	5.68963e-10	1.79595	7.14431e-09	74.3966	64.9336	229.509
Smp_136280	regulator of telomere elongation helicase 1	-0.648139	-0.148319	0.796458	8	0.81384	0.0911069	1.48199	0.000725876	2.29583	8.55576e-08	13.1077	22.0644	59.1751
Smp_118190	staphylococcal nuclease domain containing protein	-0.863607	0.0681963	0.79541	13	1.42382	0.00440352	0.956338	0.0513072	2.38015	8.20039e-07	14.6126	37.673	69.9641
Smp_172460	Krueppel factor 10 like	-0.159311	-0.635571	0.794882	8	-0.578729	0.347439	2.05378	4.14911e-05	1.47505	0.00420054	7.47735	4.62545	19.0693
Smp_042400	arginine rich, mutated in early stage tumors	-0.309366	-0.485509	0.794875	8	-0.1108	0.873008	1.83735	2.29649e-05	1.72655	9.12382e-05	231.515	197.882	691.822
Smp_159360	growth arrest specific 2	0.909982	-1.7039	0.793914	2	-3.41518	6.97634e-08	3.26264	3.30668e-07	-0.152545	0.872867	30.8798	2.38894	24.2506
Smp_148420	coiled coil domain containing 88A	-0.452904	-0.338248	0.791152	8	0.268858	0.75427	1.55012	0.011787	1.81897	0.00307295	25.1285	29.3036	84.5539
Smp_157010	titin	0.720415	-1.50952	0.789105	2	-2.81625	0.000367429	2.85402	0.00038088	0.0377611	0.97836	1.68638	0.178432	1.49257
Smp_212160	hypothetical protein	0.161777	-0.950393	0.788616	4	-1.33781	0.102832	2.57823	0.000548513	1.24042	0.133644	2.99678	1.04414	6.55288
Smp_138210	hypothetical protein	0.4872	-1.27571	0.788512	2	-2.34563	2.74268e-05	2.83701	2.77742e-07	0.491378	0.491293	68.3177	11.8455	86.6527
Smp_178800	rest corepressor (corest) protein	-1.24826	0.46015	0.788111	13	2.53634	5.32107e-07	0.557275	0.334976	3.09362	1.01824e-09	15.3141	89.1844	123.91
Smp_103160	FAA4 Long-chain-fatty-acid--CoA ligase 4	-0.157263	-0.630345	0.787608	8	-0.468044	0.585329	1.88215	0.0044194	1.41411	0.0432711	93.7745	62.5091	228.147
Smp_030000	leucine aminopeptidase (M17 family)	-0.34844	-0.438064	0.786503	8	-0.00490744	0.996817	1.73694	1.95596e-09	1.73203	3.29507e-09	264.617	245.926	785.553
Smp_133440	hypothetical protein	-0.289025	-0.496896	0.785922	8	-0.157284	0.824825	1.9306	2.84262e-05	1.77332	0.00016087	25.5727	21.5143	79.0613
Smp_159750	vacuolar protein sorting associated protein 54	-0.221802	-0.562082	0.783884	8	-0.329004	0.716498	1.70246	0.0100149	1.37345	0.0477541	9.88868	7.192	23.7739
Smp_078030	#N/A	-0.245066	-0.538187	0.783252	8	-0.308271	0.418148	1.97496	1.17315e-11	1.66669	1.9566e-08	176.482	134.509	500.834
Smp_082360	protein tyrosine kinase	1.08543	-1.86702	0.781588	2	-3.59859	2.4366e-05	3.29063	0.000143555	-0.307961	0.798938	15.026	0.8262	10.2693
Smp_018440	hypothetical protein	1.86796	-2.64899	0.781034	15	-4.69227	1.03064e-05	3.21624	0.00435578	-1.47603	0.209219	7.42246	0.0835322	1.94954
Smp_170010	radial spoke 3	1.6196	-2.40062	0.781022	15	-5.24974	5.22042e-18	4.18433	1.80989e-11	-1.06541	0.0702928	58.8651	1.11445	24.2051
Smp_140650	hypothetical protein	0.631272	-1.41227	0.780996	2	-2.66145	1.17212e-05	2.99006	7.37772e-07	0.328601	0.688242	67.9803	9.13288	77.1796
Smp_008610	deoxyribonuclease ii	-1.69852	0.918825	0.77969	10	3.5692	3.07833e-06	-0.274535	0.779604	3.29467	3.1139e-05	1.01338	15.6134	12.0846
Smp_126760	Proteasome activator complex subunit 4	-0.352002	-0.424811	0.776813	8	0.0320955	0.967658	1.76905	2.58084e-05	1.80114	2.18316e-05	1.74154	1.70789	5.52952
Smp_071410	PHD type zinc finger protein	-0.375054	-0.401648	0.776702	8	0.109937	0.876608	1.74784	7.9108e-05	1.85778	3.10908e-05	48.6901	49.4447	161.231
Smp_163570	Ryanodine receptor	0.869034	-1.64513	0.776096	2	-3.42883	5.98296e-13	3.26446	1.27228e-11	-0.164365	0.806323	3.91431	0.313834	3.05638
Smp_149050	XTP3 transactivated gene B protein	-0.0676235	-0.708307	0.775931	4	-0.798871	0.027648	2.11707	1.07978e-10	1.3182	0.00011971	102.894	55.2664	230.602
Smp_000260	proactivator polypeptide	-0.481765	-0.292188	0.773953	8	0.395519	0.371856	1.44377	6.05425e-05	1.83929	2.50918e-07	220.09	273.167	708.339
Smp_149080	protein FAM160A1	-0.345996	-0.427565	0.773561	8	0.021999	0.981444	1.69342	0.000380322	1.71542	0.000371356	10.855	10.527	32.2758
Smp_024450	#N/A	0.42882	-1.20234	0.773516	4	-2.01814	0.0184942	2.55736	0.00223997	0.539222	0.610185	9.94563	2.05843	13.0113
Smp_031300	universal stress protein	1.3143	-2.08673	0.772429	2	-4.67176	2.28384e-40	4.0349	9.69067e-30	-0.636862	0.0848165	382.72	13.3328	213.499
Smp_180760	neurexin	1.46952	-2.24055	0.771029	2	-4.46851	6.19949e-08	3.86561	5.32998e-06	-0.602893	0.529922	4.49651	0.11757	2.59304
Smp_154760	egf domain protein	0.956016	-1.72628	0.770266	2	-3.61398	6.32277e-12	3.40158	1.46103e-10	-0.212406	0.775984	14.7261	1.03738	11.0235
Smp_091660	hypothetical protein	0.0445983	-0.81471	0.770111	4	-1.06064	0.0117771	2.38946	7.36483e-10	1.32882	0.00108905	171	75.5791	383.498
Smp_147380	#N/A	1.7918	-2.56002	0.768222	15	-5.1261	1.14218e-08	4.04651	1.36289e-05	-1.0796	0.252361	24.6998	0.323123	10.1246
Smp_119050	collagen alpha chain	2.24713	-3.01368	0.766548	15	-5.75602	1.90058e-10	3.7196	0.000142206	-2.03642	0.00625491	25.6135	0.134237	4.81751
Smp_142850	hypothetical protein	-0.217016	-0.549348	0.766364	8	-0.335236	0.412477	1.80312	1.39188e-08	1.46788	6.62721e-06	121.077	89.7754	298.202
Smp_032520	lysosome associated membrane glycoprotein	-0.2599	-0.506016	0.765916	8	-0.216718	0.530311	1.77323	1.69862e-12	1.55651	1.22109e-09	548.059	440.424	1420.15
Smp_014260	UDP GlcNAc:betaGal	-0.635803	-0.129905	0.765708	8	0.821519	0.0721448	1.36588	0.00117033	2.1874	1.01911e-07	32.0728	54.3818	134.531
Smp_130940	bet1	-0.154511	-0.611038	0.765549	8	-0.488191	0.389583	1.97856	1.36589e-05	1.49037	0.00163888	268.537	176.204	678.377
Smp_139750	signal induced proliferation associated 1	-1.56311	0.798225	0.764884	13	3.37434	2.02745e-09	-0.0383252	0.968445	3.33602	6.08665e-09	3.38182	37.4368	33.608
Smp_029160	protein serac1	-0.782998	0.0186341	0.764364	13	1.28522	0.0353945	1.04168	0.0901972	2.3269	5.18922e-05	6.60198	15.9447	31.1179
Smp_063930	voltage gated potassium channel	1.62978	-2.39354	0.763751	15	-4.65271	5.35168e-07	3.54236	0.000243927	-1.11035	0.291299	16.3782	0.317088	5.92591
Smp_079420	ankyrin repeat domain containing protein 42	0.648447	-1.41143	0.762983	2	-2.77882	1.67094e-13	3.07908	2.04792e-16	0.300259	0.551276	118.767	15.7833	129.369
Smp_151250	ER lumen protein retaining receptor	-0.22508	-0.534063	0.759143	8	-0.280517	0.658559	1.86977	4.32468e-05	1.58925	0.000705422	107.507	81.4866	290.008
Smp_168660	general vesicular transport factor p115	0.125023	-0.883859	0.758836	4	-1.16701	0.194117	2.13743	0.00842968	0.970423	0.300301	25.1025	9.94681	44.7979
Smp_167750	fatty acid amide hydrolase 1	0.222876	-0.980276	0.757399	4	-1.56155	0.000864799	2.39678	1.28205e-07	0.835229	0.092856	13.4188	4.08918	21.4245
Smp_157790	nAChR subunit	2.33903	-3.09614	0.757113	15	-5.8161	1.14218e-08	3.70197	0.000538892	-2.11413	0.0533905	35.287	0.164697	5.68294
Smp_044870	zinc finger protein	-0.472225	-0.283911	0.756137	8	0.351142	0.563623	1.54217	0.00079358	1.89331	3.59387e-05	13.0547	15.6251	44.6738
Smp_165260	WW domain protein (E3 ubiquitin ligase) family	-0.184417	-0.571592	0.756009	8	-0.408843	0.064665	1.91244	8.85175e-24	1.50359	4.43479e-15	47.5021	33.5064	118.494
Smp_033130	hypothetical protein	-0.29317	-0.461204	0.754373	8	-0.0729417	0.912315	1.75327	1.1185e-05	1.68032	3.11521e-05	21.6584	19.4157	62.9615
Smp_004820	Microsomal signal peptidase 12 kDa	-0.130365	-0.622963	0.753328	8	-0.552133	0.297499	2.00921	4.19745e-06	1.45708	0.00136657	510.574	322.206	1260.52
Smp_130260	hypothetical protein	0.228707	-0.978271	0.749564	4	-1.49722	0.0312636	2.24514	0.000708093	0.747918	0.33672	10.399	3.23126	15.8047
Smp_033330	sh3 domain binding glutamic acid rich	0.0816281	-0.831174	0.749546	4	-1.12943	5.09234e-05	2.29576	4.85969e-18	1.16633	2.75879e-05	691.567	293.391	1361.13
Smp_160960	asparagine rich protein	1.3969	-2.14626	0.749364	15	-3.29907	0.00991211	2.54816	0.0530271	-0.750915	0.648987	18.3162	0.580232	8.20338
Smp_142920	coatomer protein complex subunit alpha	-0.228573	-0.518795	0.747368	8	-0.258787	0.704391	1.96207	4.24085e-05	1.70329	0.000535696	49.5437	38.7175	145.615
Smp_169430	partitioning defective 3	-0.211454	-0.535785	0.747239	8	-0.308965	0.657605	1.84733	0.000274826	1.53836	0.00329673	8.27085	6.2257	22.1019
Smp_132370	tyrosine protein phosphatase non receptor type	-0.228503	-0.516298	0.744802	8	-0.316469	0.739012	1.70731	0.0126588	1.39084	0.052392	5.18568	4.00174	12.7641
Smp_093230	actin protein 10	-0.142232	-0.602183	0.744415	8	-0.52417	0.309873	1.95013	4.21657e-06	1.42596	0.00125477	204.923	131.749	496.091
Smp_119170	hypothetical protein	-0.832875	0.0889108	0.743965	13	1.41475	0.00112472	0.890624	0.0441057	2.30538	4.74677e-08	5.4925	14.2871	24.7307
Smp_210370	ormdl protein	-0.361866	-0.378687	0.740553	8	0.110113	0.820699	1.57229	5.17919e-07	1.6824	9.39494e-08	163.472	165.022	468.298
Smp_143170	er degradation enhancing alpha mannosidase	-0.188224	-0.552259	0.740484	8	-0.381656	0.130259	1.87465	8.5344e-19	1.49299	4.4301e-12	95.7645	68.8609	236.664
Smp_146070	hypothetical protein	-0.0473114	-0.691906	0.739218	8	-0.774342	0.183979	2.21593	9.36236e-06	1.44158	0.00525656	26.0163	14.043	65.9121
Smp_070030	Charged multivesicular body protein 2b A	-0.0415284	-0.697173	0.738702	4	-0.839495	0.15295	2.02381	9.27689e-05	1.18432	0.031356	33.0297	17.1622	68.7638
Smp_130340	phosphatidylinositol 4 kinase beta	-0.360136	-0.378545	0.738681	9	0.100346	0.946024	1.41318	0.148059	1.51352	0.130549	9.39568	9.98508	26.3796
Smp_059540	signal recognition particle 54 kda protein	-0.365586	-0.372798	0.738384	8	0.114306	0.815479	1.56267	8.161e-07	1.67697	1.44165e-07	77.0616	78.7629	220.147
Smp_152430	NFI (Nuclear Factor I) family member (nfi 1)	-0.677081	-0.0603119	0.737392	8	0.940111	0.124028	1.09999	0.0572027	2.0401	0.00023098	4.08638	7.82468	15.6953
Smp_212890	metallophosphoesterase 1	-0.063864	-0.671431	0.735295	8	-0.701846	0.142356	2.1055	3.45096e-07	1.40365	0.00102107	23.4153	13.3389	55.0964
Smp_132270	poly(rC) binding protein 3	2.05262	-2.78751	0.734892	15	-5.55885	5.69213e-10	3.90678	3.58655e-05	-1.65207	0.0491169	9.83263	0.0799509	2.58751
Smp_175010	vesicular glutamate transporter	1.6957	-2.42891	0.733207	15	-5.21292	1.55447e-12	3.9889	1.73201e-07	-1.22402	0.0982225	35.3443	0.59843	12.7313
Smp_121940	FERM domain containing protein 5	0.31752	-1.05046	0.732942	4	-1.66287	0.0298834	2.3039	0.00174237	0.641031	0.482297	18.8965	5.16181	26.2517
Smp_169700	lim domain and actin binding 1	0.592553	-1.32501	0.732455	2	-2.49175	6.87924e-05	2.8457	5.12928e-06	0.353949	0.665944	21.3066	3.22186	24.7357
Smp_013300	protein YIPF6	-0.163351	-0.567143	0.730494	8	-0.419647	0.448201	1.83585	2.37374e-05	1.4162	0.00172134	456.575	313.55	1090.71
Smp_197760	exportin 7	-0.275296	-0.455164	0.73046	9	-0.055264	0.976016	1.36275	0.201728	1.30749	0.240871	5.53732	5.1698	13.6597
Smp_070770	Ufm1 conjugating enzyme 1	-0.329676	-0.400471	0.730146	8	0.0408206	0.952397	1.73636	1.5819e-05	1.77718	1.18307e-05	98.8223	95.8303	304.147
Smp_141070	glutamate receptor interacting protein 1	0.888445	-1.61793	0.729485	2	-2.92332	0.00261031	2.64819	0.0076908	-0.275138	0.840328	3.18376	0.271094	2.27924
Smp_213950	citron Rho interacting kinase	-1.34062	0.612057	0.72856	13	2.85179	1.39348e-08	0.390619	0.53134	3.24241	1.28977e-10	2.45135	18.1052	22.4886
Smp_044680	hypothetical protein	-0.95461	0.226252	0.728358	13	1.83751	3.91852e-21	0.743484	0.000223636	2.58099	6.98565e-41	51.8463	175.621	275.602
Smp_154280	hypothetical protein	-0.620413	-0.107688	0.728102	8	0.816471	0.244576	1.28073	0.0377394	2.0972	0.000589916	4.29012	7.42986	17.3766
Smp_172970	hypothetical protein	-0.853394	0.125609	0.727785	13	1.51879	4.51988e-06	0.919207	0.00503748	2.43799	6.34883e-14	15.9589	44.2034	78.182
Smp_160420	rRNA processing protein EBP2	-0.7944	0.0687569	0.725643	13	1.32273	0.00576972	0.935969	0.0553849	2.2587	8.92603e-07	41.364	100.536	183.651
Smp_059790	transketolase	-0.0592275	-0.666354	0.725581	4	-0.726128	0.0729368	1.98588	3.41572e-08	1.25975	0.000914775	624.762	348.999	1327.42
Smp_034850	TWiK family of potassium channels protein 7	0.298588	-1.02389	0.725298	4	-1.67538	0.00601786	2.28969	0.000119698	0.614305	0.381096	17.5311	4.89063	23.5186
Smp_163610	GST class mu	-0.239644	-0.485279	0.724923	8	-0.216651	0.739476	1.63019	0.00032499	1.41354	0.00238516	64.6992	51.8242	154.655
Smp_005670	rab11	-0.13523	-0.58969	0.72492	8	-0.514579	0.029919	1.9288	3.59938e-20	1.41422	3.64029e-11	235.374	153.831	552.464
Smp_152180	fad NAD binding oxidoreductases	0.633449	-1.35828	0.724828	2	-2.62148	3.90003e-07	2.88405	1.97519e-08	0.262572	0.717133	93.1679	13.2828	98.7809
Smp_127920	serine:threonine protein kinase 11	0.138021	-0.862575	0.724553	4	-1.2368	0.0584707	2.39622	6.49863e-05	1.15942	0.0804598	13.1267	5.06861	26.6933
Smp_005060	hypothetical protein	-0.471749	-0.252725	0.724475	8	0.450329	0.0705847	1.45982	1.10332e-11	1.91015	9.07509e-19	136.589	175.068	456.066
Smp_038960	lactate dehydrogenase protein	0.644162	-1.36723	0.723069	2	-2.69538	3.01645e-12	2.97376	8.23916e-15	0.278387	0.600317	583.813	80.7934	622.799
Smp_140680	endothelial differentiation factor 1	-0.393475	-0.328935	0.722411	8	0.220011	0.722489	1.56512	0.000335524	1.78513	4.12869e-05	582.773	637.289	1815.13
Smp_142490	Transmembrane protein 45B	0.906372	-1.62549	0.719119	2	-3.30421	8.04374e-10	3.30903	1.61503e-09	0.00482485	0.999193	20.7461	1.71034	18.786
Smp_162340	serine:threonine protein kinase ATR	-4.47105	3.75311	0.717943	6	7.37045	7.93344e-16	-4.19849	3.28608e-10	3.17197	0.00356792	0	4.59265	0.172883
Smp_017710	rab11 family interacting protein 3	0.125279	-0.84293	0.717652	4	-1.17866	0.144642	1.93667	0.0096213	0.758018	0.382641	11.6012	4.44478	17.6298
Smp_170250	GC rich sequence DNA binding factor	-0.189385	-0.528045	0.71743	8	-0.339512	0.676229	1.84135	0.00201052	1.50183	0.0153893	18.5847	13.4744	48.4882
Smp_020220	coatomer subunit zeta 1	-0.336578	-0.380791	0.717368	8	0.0845738	0.89617	1.65463	3.4681e-05	1.73921	1.52026e-05	243.151	242.784	727.396
Smp_168950	microtubule associated serine:threonine kinase	0.0267158	-0.743859	0.717143	4	-0.97112	0.0762651	2.05087	3.71951e-05	1.07976	0.0469351	36.5637	17.417	70.1677
Smp_130430	isopentenyl-diphosphate delta-isomerase	-0.207489	-0.50942	0.71691	8	-0.271561	0.75507	1.96071	0.0011913	1.68915	0.00659018	11.4961	8.89695	34.6376
Smp_165710	hypothetical protein	-0.104868	-0.610918	0.715787	8	-0.595465	0.0543706	1.95005	8.18749e-13	1.35459	1.3988e-06	195.208	120.242	441.964
Smp_170300	dehydrogenase:reductase SDR family member	-0.208176	-0.507546	0.715723	8	-0.291707	0.729284	1.70412	0.00471477	1.41241	0.0228594	7.07948	5.29131	17.0806
Smp_154420	clathrin heavy chain	-0.0436931	-0.671377	0.71507	4	-0.730388	0.276698	1.93128	0.000749096	1.20089	0.0526784	71.6454	40.4885	147.883
Smp_169990	Golgi reassembly stacking protein 2	-0.321097	-0.390673	0.71177	8	0.0364874	0.926944	1.55247	3.46614e-11	1.58896	1.84179e-11	125.112	120.141	332.84
Smp_148370	thyroid receptor interacting protein 11	-0.0763336	-0.634989	0.711322	8	-0.660671	0.336195	2.00871	0.000455638	1.34804	0.0271211	21.4768	12.6246	50.7378
Smp_143860	hypothetical protein	0.682261	-1.39336	0.711104	2	-2.66965	4.02931e-05	3.00331	4.47314e-06	0.333658	0.680722	8.55552	1.11611	9.84363
Smp_143520	hypothetical protein	0.457939	-1.16748	0.709545	2	-2.09808	0.00305024	2.53911	0.000300825	0.441027	0.615932	21.0195	4.09436	25.9716
Smp_125070	cystathionine beta synthase	-0.189883	-0.519558	0.709442	4	-0.398678	0.637488	1.62361	0.011709	1.22493	0.0715776	9.5139	6.69938	20.7293
Smp_136690	acetylcholinesterase	1.41673	-2.12592	0.709194	15	-4.57704	3.33135e-12	3.63372	7.00421e-08	-0.943314	0.2029	34.2912	1.04304	14.668
Smp_101280	golgi specific brefeldin a resistance guanine	-0.188819	-0.520155	0.708975	8	-0.292778	0.739156	1.66968	0.0081496	1.3769	0.0367766	11.6325	8.6729	27.8089
Smp_155120	GTPase Activating protein family member (gap 2)	0.956928	-1.66483	0.707903	15	-3.04253	0.00300464	2.57362	0.0146508	-0.46891	0.732116	3.98085	0.292197	2.4076
Smp_145410	STARP antigen	-0.65511	-0.0523473	0.707457	9	0.946483	0.193058	0.943839	0.179787	1.89032	0.0043081	5.12838	9.81374	18.1326
Smp_064190	type II inositol 1,4,5 trisphosphate	-0.0446084	-0.66183	0.706439	4	-0.710317	0.298126	1.98249	0.000595872	1.27217	0.039947	36.1543	20.6801	78.9692
Smp_084050	ATPase family AAA domain containing protein 1 B	-0.166347	-0.539825	0.706172	8	-0.336834	0.743774	1.96839	0.00725432	1.63155	0.0315469	9.80375	7.3835	29.6963
Smp_100140	protein KRTCAP2 protein	-0.358575	-0.345285	0.70386	8	0.164084	0.800567	1.50391	0.000564931	1.668	0.000134032	126.602	133.034	359.868
Smp_065470	tumor protein d52	0.00341598	-0.706938	0.703522	4	-0.874973	0.000233242	2.042	7.05007e-20	1.16703	5.05067e-07	447.338	227.093	882.112
Smp_089100	gamma glutamyltransferase 7	-0.000991394	-0.701059	0.70205	4	-0.879638	0.00894068	1.99179	1.61178e-10	1.11215	0.000705499	65.7272	33.0744	126.598
Smp_212580	Glutaredoxin protein 5	-0.408071	-0.293408	0.701479	8	0.296044	0.796703	1.74663	0.030703	2.04268	0.0116959	21.8233	25.8381	87.9601
Smp_071600	translocon associated protein, alpha	-0.284696	-0.41333	0.698026	8	-0.0479286	0.934957	1.59692	4.82298e-06	1.54899	1.18185e-05	525.527	472.418	1371.42
Smp_051500	nucleolar protein c7c	0.0966645	-0.792647	0.695982	4	-1.14004	0.0280341	2.12945	1.0906e-05	0.989415	0.0599786	78.1102	32.7962	141.009
Smp_128710	g protein coupled receptor	1.454	-2.14996	0.69596	15	-4.53125	1.15044e-08	3.64451	7.69883e-06	-0.886743	0.34561	35.1958	0.981575	16.268
Smp_154080	hypothetical protein	-5.24143	4.54665	0.694782	6	9.23259	5.76913e-27	-5.20549	3.45692e-19	4.0271	2.63931e-05	0	266.597	6.25982
Smp_164640	neuron navigator 2	1.21524	-1.90962	0.694384	15	-3.74471	9.98474e-05	3.06953	0.00188047	-0.675177	0.592467	56.829	2.51875	29.9323
Smp_140310	paxillin	0.422349	-1.11606	0.693714	4	-1.86653	0.0197604	2.34993	0.0027289	0.483406	0.625197	36.0191	7.91003	45.4157
Smp_159550	calpain 5	-0.27044	-0.423168	0.693608	8	-0.0769841	0.874549	1.58387	1.17613e-07	1.50688	6.18309e-07	16.7547	14.9094	42.195
Smp_047650	Ferritin-2 heavy chain	1.03185	-1.72481	0.692958	2	-3.73101	4.2635e-21	3.3719	5.9094e-17	-0.35911	0.447042	146.202	9.7697	99.0017
Smp_156880	protein transport protein sec24c	0.119344	-0.81088	0.691537	4	-1.19207	1.77339e-05	2.09838	3.90532e-15	0.906307	0.00154886	66.0228	26.8957	109.382
Smp_135260	#N/A	-0.460387	-0.231062	0.691449	8	0.473648	0.384499	1.20779	0.008174	1.68144	0.000176385	58.1788	75.1674	167.689
Smp_163000	hypothetical protein	-0.12731	-0.562264	0.689574	4	-0.482647	0.240504	1.75627	3.11437e-07	1.27363	0.000341997	45.4854	30.7699	97.8078
Smp_154160	ER lumen protein retaining receptor	-0.431965	-0.256151	0.688116	8	0.391903	0.515258	1.29137	0.00653469	1.68327	0.000344945	34.4339	42.8907	99.3467
Smp_084320	ethanolaminephosphotransferase 1	-0.432743	-0.255124	0.687867	8	0.368227	0.385822	1.29565	0.000166099	1.66388	1.09022e-06	99.8797	121.481	283.714
Smp_072190	membrane associated protein 29	0.197736	-0.884141	0.686406	4	-1.38339	0.000254049	2.14714	3.73489e-09	0.763753	0.0654992	1036.24	364.452	1551.72
Smp_035470	dolichyl diphosphooligosaccharide protein	-0.356528	-0.32974	0.686268	8	0.17007	0.664002	1.49612	5.47296e-08	1.66619	1.61988e-09	409.415	431.632	1152.41
Smp_132600	membrane associated guanylate kinase, WW and PDZ	-0.109471	-0.575955	0.685426	8	-0.515066	0.476891	1.85465	0.00125305	1.33959	0.0255945	12.9703	8.45597	30.523
Smp_213590	hypothetical protein	0.113293	-0.798258	0.684965	4	-1.15155	1.9299e-05	2.15445	8.04821e-17	1.0029	0.000190374	69.2746	29.0179	122.421
Smp_144590	ras gtpase activating protein	0.579884	-1.26295	0.68307	2	-2.44277	4.07469e-06	2.70048	3.08636e-07	0.257704	0.728246	20.9059	3.38234	22.4989
Smp_122080	hypothetical protein	0.0387958	-0.717359	0.678563	4	-0.951592	0.00257822	2.00521	1.26144e-11	1.05362	0.000720232	379.567	183.3	699.572
Smp_180980	Rootletin	0.417823	-1.09623	0.678409	4	-1.88475	0.0219069	2.49954	0.00169258	0.614794	0.538466	48.0242	11.2886	68.2443
Smp_136540	DNAJ	1.06286	-1.74122	0.678358	2	-3.77221	1.55257e-13	3.38607	5.23179e-11	-0.386145	0.566885	123.437	7.78594	82.8541
Smp_001780	hypothetical protein	0.923798	-1.60111	0.677312	2	-3.27575	2.28648e-07	2.99683	4.07691e-06	-0.278925	0.739429	15.5047	1.28946	10.8274
Smp_172870	hypothetical protein	-0.360613	-0.316617	0.67723	8	0.203805	0.829025	1.37775	0.0335082	1.58156	0.0156596	15.6809	17.0802	43.4444
Smp_174090	coiled coil domain containing protein 40	1.23241	-1.90936	0.676947	15	-3.78401	2.47051e-05	3.30505	0.000310172	-0.478966	0.688817	12.4227	0.549923	7.7451
Smp_139650	hypothetical protein	-0.477014	-0.19776	0.674774	8	0.492791	0.615763	1.16621	0.14712	1.659	0.0349978	20.3528	27.7688	62.7335
Smp_033990	dynactin subunit 5	-0.288341	-0.385837	0.674178	8	0.00403439	0.999863	1.51991	0.000365156	1.52395	0.000416309	174.044	162.295	449.278
Smp_022890	hypothetical protein	1.25438	-1.92764	0.673264	15	-3.69824	0.000298672	2.79878	0.00834838	-0.899461	0.484958	21.8703	0.875283	9.54021
Smp_212080	guanine nucleotide exchange	-0.443762	-0.228747	0.672509	8	0.414776	0.415545	1.3517	0.00106089	1.76647	1.46538e-05	7.83943	10.0409	23.9946
Smp_036940	protein transport protein Sec61 subunit	-0.575985	-0.0955308	0.671516	8	0.803835	0.123772	1.21482	0.0118924	2.01865	1.43818e-05	219.647	366.739	814.035
Smp_042550	sorting nexin 2	0.1014	-0.771987	0.670587	4	-1.11977	4.10945e-09	2.09665	6.71456e-30	0.976886	2.65213e-07	139.513	59.9877	241.552
Smp_210780	Loss of heterozygosity 11 chromosomal region 2	0.139891	-0.808641	0.66875	4	-1.20709	1.78982e-06	2.12097	3.49143e-18	0.913878	0.000421727	73.4423	29.5925	121.648
Smp_124250	high affinity cGMP specific 3',5' cyclic	0.291468	-0.959967	0.6685	4	-1.48313	0.125755	1.95606	0.0336095	0.472924	0.686022	13.1933	4.0182	16.3544
Smp_169980	serine:threonine protein kinase:endoribonuclease	-0.365013	-0.3003	0.665312	8	0.232906	0.841231	1.39643	0.0901972	1.62934	0.0494212	10.2811	11.9042	30.3992
Smp_140000	tetraspanin CD63 receptor	1.12518	-1.79013	0.664946	2	-3.98325	1.19078e-26	3.43044	8.21122e-20	-0.552804	0.209199	269.852	15.2713	161.282
Smp_120800	DNAj subfamily C member	0.223062	-0.887407	0.664345	4	-1.45666	2.94143e-05	2.14514	2.53213e-10	0.688477	0.0739364	124.613	42.0091	178.911
Smp_135730	protocadherin alpha 7	2.06875	-2.73299	0.664244	15	-5.42316	1.34239e-09	3.83399	4.80645e-05	-1.58917	0.0608016	9.87327	0.0864728	2.75171
Smp_176070	ralA binding protein 1	-0.161391	-0.502587	0.663978	8	-0.321593	0.759445	1.62913	0.0325152	1.30753	0.105194	5.47415	4.08432	12.8683
Smp_210910	#N/A	0.0640459	-0.727409	0.663363	4	-0.951047	0.144395	2.17411	0.000168251	1.22307	0.0461495	25.0857	11.7738	54.2846
Smp_005720	Aquaporin 3 (AQP 3)	0.908333	-1.57013	0.6618	2	-3.26298	2.14199e-08	2.80267	2.03686e-06	-0.460308	0.556412	388.01	33.2369	245.202
Smp_176640	Zinc finger, RING type,domain containing protein	-0.25383	-0.406749	0.660578	8	-0.0865643	0.832938	1.6045	4.63668e-10	1.51794	6.22032e-09	139.476	123.193	354.695
Smp_083240	hypothetical protein	0.218124	-0.878526	0.660402	4	-1.42594	0.000161017	2.19981	1.78374e-09	0.773873	0.0586112	185.994	62.9683	283.761
Smp_208060	cation transporting atpase worm	-0.11442	-0.545921	0.660341	8	-0.435147	0.567994	1.77222	0.00257762	1.33708	0.03062	12.5631	8.71939	28.4292
Smp_160950	zinc fingerprotein 1	-0.348101	-0.310438	0.658539	8	0.200829	0.674054	1.34413	8.08922e-05	1.54496	5.9713e-06	73.8789	79.3952	191.209
Smp_131250	hypothetical protein	0.48907	-1.14701	0.657938	4	-2.17762	5.57944e-11	2.5045	2.99946e-14	0.326878	0.447488	310.091	62.7415	340.685
Smp_138990	#N/A	-0.146281	-0.510916	0.657197	4	-0.407227	0.562113	1.61217	0.00309088	1.20494	0.0361012	229.891	161.944	486.233
Smp_072950	Transmembrane emp24 domain containing protein 4	-0.171498	-0.485246	0.656743	8	-0.292444	0.599523	1.68512	4.42258e-05	1.39267	0.00108488	403.627	303.316	944.656
Smp_160830	phospholipase d3	-1.62209	0.966636	0.655449	10	3.21692	0.000555143	-0.578832	0.608711	2.63808	0.00740574	0.875993	11.3708	6.65903
Smp_000040	kinesin light chain	0.0274663	-0.6825	0.655033	4	-0.894287	0.00141923	1.90315	4.76625e-13	1.00887	0.000295528	212.683	107.689	379.623
Smp_065890	toll interacting protein	0.224954	-0.879311	0.654357	4	-1.41684	1.95978e-08	2.24971	5.12634e-20	0.832862	0.00169794	391.198	135.244	608.777
Smp_136700	hypothetical protein	-0.0737304	-0.58038	0.65411	4	-0.556118	0.185108	1.79217	5.76007e-07	1.23605	0.000922594	334.409	210.579	693.476
Smp_131780	CUG BP and ETR3 factor	-0.817471	0.163909	0.653562	13	1.48734	0.00522146	0.644826	0.274956	2.13217	3.94857e-05	21.2161	59.1313	86.2457
Smp_158820	myotubularin protein 13	-0.160268	-0.492638	0.652906	8	-0.345144	0.682128	1.631	0.00931489	1.28586	0.0514922	4.54867	3.42155	10.2509
Smp_138150	rho type gtpase activating protein	-0.989174	0.336611	0.652564	13	1.9619	0.000237986	0.563771	0.364472	2.52567	1.794e-06	4.2936	16.5856	23.4622
Smp_174670	Ubiquitin conjugating enzyme E2 J1	-0.138621	-0.513767	0.652388	8	-0.404823	0.30345	1.68645	1.40371e-07	1.28163	0.000104806	66.4273	46.6537	143.886
Smp_041280	CUGBP Elav family	1.45328	-2.10448	0.651197	15	-4.65612	5.51632e-12	3.7322	5.2617e-08	-0.923915	0.257824	166.081	4.86181	74.4404
Smp_156500	rap guanine nucleotide exchange factor 1	1.00879	-1.65992	0.651127	2	-3.41567	2.98973e-06	3.14043	2.28582e-05	-0.275244	0.790536	11.3996	0.832165	8.24387
Smp_151290	multidrug and toxin extrusion protein 2	0.031009	-0.680768	0.649759	4	-0.852356	0.0137691	1.97744	5.23603e-10	1.12508	0.000817763	55.8765	28.573	106.953
Smp_092530	adapter protein complex 1 gamma subunit	-0.180243	-0.469348	0.649591	8	-0.288539	0.229146	1.63072	6.60159e-17	1.34218	1.48141e-11	132.355	101.343	296.703
Smp_188070	ubiquitin carboxyl terminal hydrolase of the	-0.154427	-0.494707	0.649135	8	-0.362461	0.480072	1.8272	3.41242e-06	1.46474	0.00028168	107.502	78.334	269.352
Smp_150490	hypothetical protein	0.584942	-1.23403	0.649084	2	-2.30567	0.00120756	2.6457	0.00018534	0.340023	0.719736	59.1937	10.0287	67.6984
Smp_097730	serum response factor	-0.295306	-0.353081	0.648386	8	0.0244068	0.972263	1.40189	0.000180098	1.42629	0.000161012	81.2617	77.8738	197.483
Smp_148430	hook protein	-0.365244	-0.28279	0.648035	8	0.212019	0.807928	1.3655	0.0254955	1.57752	0.010037	12.4039	13.8695	34.8995
Smp_210500	cathepsin L	-0.227912	-0.419796	0.647709	8	-0.122932	0.856548	1.48664	0.000749384	1.36371	0.00251356	174.262	149.548	399.46
Smp_126500	tensin C1 domain containing phosphatase	0.493216	-1.14051	0.647292	4	-2.07103	0.00398444	2.21393	0.00205436	0.142905	0.892746	14.2402	2.83235	13.9871
Smp_134780	RING finger protein 103	-0.309448	-0.337269	0.646717	8	0.118474	0.909187	1.63275	0.0145628	1.75123	0.0096003	3.77798	3.84241	12.011
Smp_212400	exportin 7 A	-0.636585	-0.00757214	0.644157	9	1.04476	0.130826	1.071	0.108737	2.11577	0.000811129	7.1582	14.8079	29.8194
Smp_079310	transmembrane emp24 domain containing protein	-0.125215	-0.51887	0.644085	8	-0.41961	0.278197	1.70353	7.8342e-08	1.28392	9.10275e-05	543.503	375.698	1171.75
Smp_142910	coatomer subunit alpha	-0.100718	-0.543189	0.643906	4	-0.493484	0.191678	1.654	2.70103e-07	1.16052	0.000519289	40.346	26.7916	79.9788
Smp_024000	vacuolar protein sorting associated protein 33B	-0.342757	-0.300984	0.643741	8	0.200695	0.586633	1.29754	1.53762e-06	1.49823	3.12923e-08	29.9009	32.2769	75.0776
Smp_105090	Tr4/Tr2 (homologue)	-0.314176	-0.327813	0.641989	8	0.128966	0.886912	1.46745	0.0129224	1.59641	0.00740638	5.93624	6.11558	16.4158
Smp_135790	Intersectin 1	-0.0736331	-0.567885	0.641518	4	-0.549448	0.314765	1.72322	0.000155626	1.17378	0.015107	21.4574	13.8223	43.4712
Smp_079370	hypothetical protein	-0.434135	-0.205606	0.639741	8	0.431205	0.488971	1.18074	0.0200187	1.61195	0.00121966	12.6082	16.2964	35.0274
Smp_033620	hypothetical protein	-0.113924	-0.525701	0.639625	4	-0.448758	0.318823	1.67028	6.08963e-06	1.22153	0.00145918	124.377	83.9044	257.136
Smp_125280	F box only protein 16	1.1155	-1.75472	0.639217	2	-3.65983	3.8368e-07	3.20628	1.42481e-05	-0.453546	0.623225	39.34	2.432	24.9108
Smp_099310	protein transport protein SEC23	-0.00925376	-0.629666	0.63892	4	-0.745367	0.0128967	1.84122	2.11722e-11	1.09586	0.000145166	88.7885	49.2183	167.61
Smp_152020	SID1 transmembrane family	-0.166068	-0.472092	0.638161	8	-0.286227	0.402833	1.55665	4.96623e-09	1.27042	2.88338e-06	20.2291	15.5222	42.8778
Smp_052890	hypothetical protein	-0.188903	-0.449006	0.637909	8	-0.213227	0.644866	1.6347	7.25381e-07	1.42147	2.42722e-05	102.849	82.1416	244.065
Smp_048240	mannose 1 phosphate guanyltransferase	0.0264331	-0.664128	0.637695	4	-0.846499	0.000307615	1.88008	2.05453e-17	1.03358	6.69185e-06	101.696	52.7577	182.774
Smp_146730	a disintegrin and metalloproteinase with	-1.4072	0.770578	0.63662	13	3.13323	4.74137e-13	-0.221833	0.697353	2.9114	4.65479e-11	6.54624	58.1394	46.2991
Smp_172040	protein unc 13 B	1.05758	-1.69385	0.63627	2	-3.4473	6.65485e-06	3.28236	2.219e-05	-0.164944	0.885307	4.63506	0.310176	3.62613
Smp_165200	hypothetical protein	-0.026818	-0.609261	0.636079	4	-0.659076	0.28223	1.6528	0.00167887	0.99372	0.0826215	31.8519	18.676	57.4519
Smp_136910	DnaJ dnj 2	-0.595933	-0.0401332	0.636066	8	0.870929	0.133356	1.13506	0.0340686	2.00598	0.00011892	8.04931	14.2842	30.0681
Smp_142790	guanine nucleotide binding protein alpha	1.49656	-2.13259	0.636034	15	-4.12729	1.32558e-05	3.46926	0.000388566	-0.658028	0.574309	15.6275	0.452654	8.42634
Smp_198230	hypothetical protein	0.305297	-0.940835	0.635538	4	-1.58446	0.0170322	2.20536	0.000547334	0.620895	0.433971	86.6903	25.7868	121.289
Smp_168650	microtubule actin cross linking factor 1	0.0363604	-0.671312	0.634952	4	-0.856831	0.173732	1.9664	0.000413246	1.10956	0.0657642	4.48995	2.32242	8.8491
Smp_080110	coiled coil domain containing protein 12	-0.116887	-0.517792	0.634679	8	-0.400257	0.660705	1.74019	0.0113306	1.33993	0.0625803	14.535	10.2306	34.6639
Smp_130460	oligomeric golgi complex subunit 3	-0.327345	-0.306712	0.634057	8	0.153668	0.807928	1.25243	0.0037413	1.4061	0.00114977	32.4803	33.8065	77.5541
Smp_105040	CCR4 carbon catabolite repression 4	-0.174244	-0.459232	0.633476	8	-0.300202	0.531324	1.54069	2.04354e-05	1.24049	0.000888777	68.1953	51.8066	144.066
Smp_032310	arp2:3 complex 21 kda subunit	-0.120367	-0.512582	0.632949	4	-0.41141	0.411981	1.65377	3.55629e-05	1.24237	0.00292961	324.559	225.475	684.955
Smp_029520	actin binding lim protein 1	0.4372	-1.06985	0.632651	4	-1.88334	0.0042572	2.31432	0.000368984	0.43098	0.603411	38.1009	9.06022	45.872
Smp_124430	coatomer protein complex, subunit beta 1	-0.298832	-0.333519	0.632351	8	0.076036	0.849532	1.38753	3.67708e-08	1.46356	8.22031e-09	96.9657	95.9316	236.595
Smp_143740	uroporphyrinogen decarboxylase	-1.28408	0.65303	0.631051	13	2.84785	1.21866e-12	0.00348592	1	2.85134	4.04994e-12	5.94167	41.8377	39.535
Smp_155630	hypothetical protein	-0.397821	-0.232878	0.630699	8	0.353387	0.380083	1.28708	7.7349e-05	1.64047	3.88757e-07	76.1689	91.0353	213.217
Smp_210600	aspartyl aminopeptidase (M18 family)	-0.310395	-0.320136	0.630531	9	0.136888	0.93169	1.00117	0.388492	1.13806	0.337222	3.34856	3.56215	7.29663
Smp_003110	Nadrin protein	0.978895	-1.60934	0.630444	2	-3.32597	1.18536e-05	2.954	0.000145815	-0.371969	0.715053	34.6961	2.62526	23.2773
Smp_193120	myosin heavy chain	1.01961	-1.64994	0.630334	2	-3.28203	0.000257787	2.66496	0.00444104	-0.617068	0.585343	106.995	7.3142	58.492
Smp_164860	hypothetical protein	-0.139204	-0.489773	0.628976	8	-0.366849	0.59663	1.67267	0.001442	1.30582	0.0161465	13.7665	10.0324	31.3372
Smp_035190	ras GTP exchange factor son of sevenless	0.0640253	-0.692725	0.6287	4	-0.908082	0.105315	1.84148	0.000290945	0.933394	0.0959918	9.54302	4.74181	16.3278
Smp_056760	protein disulfide isomerase	-0.11303	-0.515605	0.628635	4	-0.443131	0.0293608	1.66212	3.23611e-20	1.21899	4.72991e-11	1157.34	796.004	2368.08
Smp_175420	microsomal signal peptidase 22 kDa	-0.147014	-0.480326	0.62734	8	-0.321768	0.554767	1.64888	6.02402e-05	1.32711	0.00182918	495.756	365.957	1107.42
Smp_177080	alpha 1,3 mannosyltransferase ALG2	-0.194938	-0.432383	0.627322	8	-0.204055	0.526221	1.50066	2.10634e-10	1.29661	7.18057e-08	95.5639	78.3472	207.287
Smp_134670	ral gtpase activating	-0.316429	-0.310789	0.627218	8	0.157917	0.871386	1.44313	0.0271685	1.60105	0.015107	8.51209	9.12791	23.6474
Smp_132260	serine:threonine protein kinase	0.0682445	-0.693832	0.625588	4	-0.896769	0.182692	1.80195	0.00301712	0.905184	0.170152	1.71301	0.85954	2.90606
Smp_028190	methylthioadenosine phosphorylase	-0.381701	-0.243486	0.625187	8	0.318847	0.297042	1.29718	1.82085e-07	1.61603	7.31784e-11	121.932	141.924	331.896
Smp_165680	UNC93 protein MFSD11 like	-0.301155	-0.323695	0.624851	8	0.0966334	0.862497	1.3514	0.000146273	1.44803	5.112e-05	86.7079	86.4989	210.962
Smp_054770	hypothetical protein	-1.43235	0.808286	0.624064	13	3.06538	2.5804e-06	-0.193729	0.831457	2.87165	1.77716e-05	2.24531	20.4048	16.821
Smp_000780	#N/A	1.07285	-1.69517	0.622319	2	-3.53693	3.86947e-07	3.11253	1.30644e-05	-0.424403	0.63831	16.6793	1.10923	10.5501
Smp_139840	kunitz type protease inhibitor 2	0.171008	-0.792606	0.621597	4	-1.24706	5.56443e-10	2.06713	5.82789e-26	0.82007	7.102e-05	535.773	209.967	834.235
Smp_131840	25 kDa integral membrane protein	-0.795342	0.174488	0.620853	13	1.51518	8.58088e-08	0.592006	0.0486736	2.10719	8.51409e-14	33.6632	91.4769	128.943
Smp_135020	oxalate:formate antiporter	-0.605467	-0.0152192	0.620686	8	0.948892	0.17546	1.07567	0.105276	2.02456	0.00135831	12.7795	23.9273	49.5238
Smp_162290	hypothetical protein	0.570236	-1.18983	0.619593	4	-2.16068	0.0176631	2.258	0.012739	0.0973153	0.944312	26.9551	4.81865	26.1556
Smp_139340	hypothetical protein	0.444443	-1.06358	0.619137	4	-1.99894	3.27313e-14	2.36136	1.37675e-19	0.362422	0.262988	422.908	97.3186	475.317
Smp_009830	translocon associated protein subunit beta	-0.250151	-0.368657	0.618808	8	-0.0277171	0.970278	1.46422	0.000265394	1.43651	0.000422507	438.519	400.218	1056.13
Smp_149820	glycoprotein N acetylgalactosamine	1.53721	-2.15523	0.618017	15	-5.01114	9.30063e-24	3.69968	5.46436e-13	-1.31146	0.00783865	181.187	4.555	62.859
Smp_006810	lim domain only 4	-0.324628	-0.292787	0.617415	8	0.169488	0.70603	1.28656	4.68225e-05	1.45605	4.12689e-06	505.951	531.592	1240.57
Smp_154040	sugar nucleotide epimerase	-0.166352	-0.45079	0.617141	4	-0.287271	0.356642	1.49318	1.46494e-09	1.20591	1.87221e-06	180.226	139.111	366.736
Smp_169470	RAB18, member RAS oncogene family	-0.0440042	-0.572417	0.616422	4	-0.598462	0.0582512	1.68134	2.32536e-09	1.08287	0.000226886	191.451	116.997	355.05
Smp_041550	hypothetical protein	0.348769	-0.964943	0.616174	4	-1.72221	0.000270727	2.06858	9.65738e-06	0.346375	0.573226	204.363	55.5069	230.813
Smp_173730	hypothetical protein	0.506196	-1.12218	0.615984	4	-2.16878	3.49718e-18	2.4995	1.32635e-23	0.330712	0.271811	147.767	30.1039	162.056
Smp_114540	hypothetical protein	0.76753	-1.38332	0.615789	2	-2.73198	0.000192768	2.6607	0.000390315	-0.071275	0.94972	36.3977	4.36755	30.6198
Smp_176810	ELAV protein 2	-0.462505	-0.152983	0.615488	8	0.54835	0.130826	1.13343	0.00048354	1.68178	1.26298e-07	66.0331	91.4933	190.45
Smp_143240	trafficking protein particle complex subunit 11	-0.184681	-0.43059	0.615271	8	-0.186432	0.790544	1.46933	0.00230941	1.28289	0.00977014	6.98759	5.77628	15.4511
Smp_091650	phospholipid transporting ATPase IIB	0.143283	-0.758196	0.614913	4	-1.10665	0.0325133	1.86819	0.000119029	0.761544	0.173447	94.16	40.2876	141.352
Smp_204020	hypothetical protein	3.55574	-4.16963	0.613898	15	-5.86225	1.40761e-07	2.28618	0.0793735	-3.57607	0.00116988	18.8458	0	0.754679
Smp_165330	GPN loop GTPase 2	-0.31422	-0.299055	0.613275	8	0.172996	0.854006	1.29477	0.0428344	1.46777	0.0232712	6.49973	6.81118	16.506
Smp_157230	adenosine 3' phospho 5' phosphosulfate	-0.180857	-0.431933	0.61279	8	-0.228582	0.693876	1.56768	0.00015561	1.33909	0.00166996	76.6167	61.1547	173.37
Smp_089220	regulator of microtubule dynamics protein	-0.0775396	-0.534282	0.611821	4	-0.477936	0.312566	1.66414	2.04649e-05	1.1862	0.00371036	94.5841	62.3849	190.36
Smp_013860	glutamate cysteine ligase catalytic subunit	-0.370456	-0.240994	0.61145	8	0.303194	0.564465	1.13991	0.00525582	1.44311	0.000365727	26.6723	31.3312	64.9962
Smp_124110	kanadaptin	-0.214673	-0.395936	0.610609	8	-0.12583	0.920219	1.35621	0.112164	1.23038	0.169558	4.41518	3.78746	9.95085
Smp_032180	ADP ribosylation factor	0.124735	-0.735216	0.610481	4	-1.07734	0.00530677	1.96253	7.19011e-08	0.885187	0.0280261	1418.22	618.363	2306.02
Smp_060940	eukaryotic translation initiation factor 2 alpha	-0.432785	-0.177389	0.610174	9	0.480819	0.347846	1.02592	0.0204714	1.50674	0.000478152	23.5432	31.2607	60.5422
Smp_031050	BSD domain containing protein 1	-0.109771	-0.499848	0.609619	4	-0.424944	0.55111	1.48221	0.00809506	1.05727	0.0776501	145.698	101.042	277.108
Smp_132610	hypothetical protein	-0.0606298	-0.548927	0.609557	4	-0.551132	0.590439	1.48063	0.0738505	0.929501	0.313672	21.0438	13.2825	37.8437
Smp_026770	small nuclear ribonucleoprotein associated	-0.446216	-0.16304	0.609256	8	0.518886	0.419548	1.17762	0.0305448	1.6965	0.00136657	256.911	349.989	764.8
Smp_056850	hypothetical protein	0.00518205	-0.613277	0.608095	4	-0.756268	0.0597089	1.85329	2.97716e-07	1.09702	0.00423436	130.653	71.4088	249.301
Smp_197080	titin	1.08984	-1.697	0.607164	15	-3.46971	5.21274e-05	2.81866	0.00139628	-0.651053	0.558977	23.9096	1.54637	12.8359
Smp_171750	axis inhibition protein axin	-0.170483	-0.436012	0.606495	8	-0.207553	0.842555	1.44516	0.0466876	1.23761	0.105863	35.2644	28.3395	76.84
Smp_091230	ubiquitin fold modifier 1	-0.0632596	-0.542318	0.605578	4	-0.508834	0.384524	1.67201	0.000501044	1.16318	0.0223166	314.875	203.195	628.464
Smp_171580	aromatic amino acid decarboxylase	0.240575	-0.846036	0.605461	4	-1.36843	0.00212933	2.15088	4.82077e-07	0.782453	0.108492	70.7449	25.3009	109.206
Smp_149240	chromobox protein 2	0.246552	-0.85171	0.605157	4	-1.39474	0.0395362	2.01751	0.00183917	0.622778	0.425186	6.08565	2.12926	8.44725
Smp_132330	ras protein rab 35	-0.264448	-0.339993	0.604441	8	0.0345529	0.940555	1.30604	2.04262e-06	1.34059	1.34645e-06	69.7936	67.1838	155.879
Smp_122900	beta arrestin	1.16147	-1.76573	0.604261	2	-3.97112	4.36281e-17	3.22641	1.96369e-11	-0.744713	0.174063	161.83	8.96729	83.6089
Smp_122680	oligophrenin 1	0.197269	-0.800418	0.603148	4	-1.31009	0.0366879	1.84967	0.00205082	0.539587	0.469133	28.0703	10.1502	36.9826
Smp_086420	protein FAM114A2	0.0169485	-0.61991	0.602961	4	-0.791244	0.223094	1.79362	0.00167578	1.00237	0.109035	68.4297	36.8204	126.255
Smp_155510	transmembrane protein 66	0.232995	-0.835906	0.602911	4	-1.38477	0.000688108	2.05943	1.8264e-07	0.674658	0.138943	167.1	58.996	237.438
Smp_132570	choline:ethanolamine kinase	-0.582222	-0.0206636	0.602886	9	0.901165	0.070588	0.926965	0.0561286	1.82813	7.22867e-05	27.0506	48.7545	88.2106
Smp_046250	Transmembrane emp24 domain containing protein 2	-0.457202	-0.145461	0.602663	8	0.582081	0.19103	1.16313	0.00344963	1.74521	6.16876e-06	361.052	509.393	1081.44
Smp_211120	Circulating cathodic antigen	-0.415415	-0.184541	0.599956	8	0.456805	0.602455	1.43334	0.0374555	1.89014	0.0056921	12.1389	15.9113	43.0594
Smp_087860	phosphomannomutase 2	-0.389372	-0.21031	0.599682	8	0.399641	0.349249	1.14943	0.00115082	1.54907	1.00152e-05	28.6114	35.9044	74.3254
Smp_006740	major vault protein	-0.450588	-0.147039	0.597627	9	0.555081	0.16845	1.00552	0.00589687	1.5606	9.81667e-06	101.005	140.023	267.045
Smp_170200	alpha tocopherol transfer protein	0.2264	-0.822602	0.596202	4	-1.34619	0.0004727	2.14801	7.3787e-09	0.80182	0.0496898	58.2233	21.2194	91.0986
Smp_095010	Sialin (Solute carrier family 17)	-0.302458	-0.293253	0.595711	9	0.137275	0.836939	1.20145	0.00768889	1.33872	0.00309328	39.8483	41.277	90.1332
Smp_102510	peripheral type benzodiazepine receptor	-0.307703	-0.287706	0.595408	8	0.186845	0.783466	1.34346	0.00435578	1.53031	0.00115916	103.668	109.47	267.095
Smp_103930	alpha 1,2 mannosyltransferase ALG9	-0.565774	-0.0289667	0.594741	9	0.894915	0.00624495	0.912863	0.00505456	1.80778	5.07496e-09	150.793	263.271	470.445
Smp_197620	hypothetical protein	0.0114524	-0.606142	0.59469	4	-0.686764	0.2843	1.62386	0.00341111	0.937095	0.124591	45.2833	26.1522	77.7899
Smp_059170	troponin i	1.12451	-1.7192	0.594689	2	-3.54596	1.95901e-05	2.98392	0.000512534	-0.562033	0.593197	21.9782	1.33966	12.6927
Smp_152390	hypothetical protein	1.10956	-1.70409	0.594534	2	-3.40389	7.40294e-05	3.04603	0.000551685	-0.357863	0.758062	22.0645	1.46266	14.8533
Smp_014170	serine:threonine protein kinase	0.253305	-0.846992	0.593688	4	-1.29201	0.178323	1.87453	0.0355942	0.582527	0.6018	47.414	15.9953	66.0355
Smp_000720	homeodomain interacting protein kinase 2	-0.124573	-0.469064	0.593637	9	-0.296721	0.789898	1.53507	0.0554474	1.23835	0.14655	5.77016	4.40832	12.5111
Smp_008290	trafficking protein particle complex subunit 9	-0.110033	-0.482694	0.592727	8	-0.343364	0.636071	1.68693	0.00180148	1.34357	0.0167261	3.41137	2.48101	7.86706
Smp_127840	Dipeptidyl peptidase 9	0.0275372	-0.62007	0.592533	4	-0.741702	0.2382	1.52135	0.00641781	0.779651	0.213565	14.1043	7.69297	21.5459
Smp_150340	solute carrier family 16	-0.324046	-0.267258	0.591304	9	0.210544	0.810291	1.13943	0.0699585	1.34997	0.0322003	15.8011	17.4437	36.7681
Smp_022320	cytochrome c type heme lyase	-0.353871	-0.236212	0.590084	8	0.295488	0.586633	1.18084	0.00477388	1.47633	0.000368032	93.6115	108.198	232.744
Smp_160100	hypothetical protein	-0.181691	-0.408022	0.589712	8	-0.188762	0.646737	1.40803	1.75944e-06	1.21927	4.55584e-05	21.7835	17.8286	44.6706
Smp_052420	centaurin gamma 1A	-0.383354	-0.2058	0.589153	9	0.370213	0.601021	1.14471	0.0410922	1.51492	0.00626674	30.6253	37.2225	80.8621
Smp_131890	sodium:chloride dependent transporter	-1.50151	0.913911	0.587601	13	3.54076	3.22555e-28	-0.547907	0.140921	2.99285	3.77892e-20	22.9211	260.322	165.727
Smp_181100	oligosaccharyltransferase complex subunit ostc	-0.0859975	-0.501553	0.587551	4	-0.428424	0.459892	1.60378	0.00051294	1.17536	0.0154707	160.913	110.78	322.68
Smp_018670	tyrosine protein phosphatase non receptor type	-0.22629	-0.36006	0.58635	9	-0.0233062	0.991196	1.20805	0.206357	1.18474	0.234149	14.3087	13.3715	30.4204
Smp_146940	innexin	1.5107	-2.09616	0.585461	15	-4.79737	4.79099e-19	3.61047	6.48197e-11	-1.1869	0.0330156	31.9442	0.904682	11.7942
Smp_067800	fibrillin 2	0.426193	-1.0115	0.585307	4	-1.85236	2.84082e-05	2.18926	5.29766e-07	0.336891	0.565634	1377.01	344.167	1515.01
Smp_015070	vacuolar atp synthase subunit h	0.386656	-0.971577	0.584921	4	-1.79752	5.77402e-10	2.23999	5.23564e-15	0.442466	0.200692	335.513	89.4632	399.379
Smp_128150	oxysterol binding protein 1	-0.0839804	-0.50088	0.58486	4	-0.433771	0.508844	1.41631	0.00697273	0.982534	0.0801271	14.3183	9.79058	24.9455
Smp_167550	sorting nexin 33	-0.118398	-0.465803	0.584201	4	-0.363035	0.592567	1.33916	0.0111069	0.976124	0.0830683	63.2612	46.2465	111.917
Smp_140180	transmembrane emp24 domain containing protein 7	0.124259	-0.708283	0.584025	4	-1.0163	0.0175373	1.84	4.63002e-06	0.823704	0.0647632	157.376	70.8082	245.7
Smp_079480	hypothetical protein	1.26435	-1.84825	0.583902	15	-4.24347	3.54923e-23	3.39587	1.03591e-14	-0.8476	0.0580118	160.618	7.22648	78.0647
Smp_006390	Cystatin B (Stefin B)	-0.239236	-0.344535	0.583772	8	-0.00378981	1	1.35811	0.00306544	1.35432	0.0036429	626.396	588.145	1430
Smp_159540	baculoviral IAP repeat containing protein 6	-0.248243	-0.332602	0.580845	9	-0.0250957	0.982891	1.25614	0.039957	1.23105	0.0503721	1.51537	1.43477	3.28687
Smp_136980	protein rogdi	0.143702	-0.724037	0.580335	4	-1.01832	0.220676	2.01859	0.00654045	1.00027	0.224224	13.5183	6.04403	25.034
Smp_085530	synapse associated protein	0.257062	-0.836746	0.579684	4	-1.40606	0.00280806	1.95633	1.70071e-05	0.550272	0.321352	363.525	125.343	475.874
Smp_061310	hypothetical protein	0.0603602	-0.639943	0.579583	4	-0.876368	0.00194771	1.72736	1.02874e-10	0.850996	0.00285735	147.426	75.0399	235.491
Smp_152710	glutathione s transferase omega	-0.380467	-0.198997	0.579463	8	0.390908	0.398477	1.10311	0.00413457	1.49401	7.36531e-05	299.727	366.737	756.189
Smp_082620	farnesylated protein converting enzyme 1	-0.244785	-0.33419	0.578975	8	0.0107216	0.990119	1.36002	0.000183714	1.37074	0.000192796	257.113	241.329	589.912
Smp_104520	vacuolar protein sorting 45	0.398771	-0.977234	0.578463	4	-1.84639	6.73283e-14	2.26554	1.40069e-20	0.419152	0.15196	269.834	70.2058	317.502
Smp_147250	multidrug resistance associated protein 7	-0.275645	-0.300823	0.576468	8	0.120233	0.893239	1.30999	0.0255605	1.43023	0.0157689	12.3895	12.9869	30.3006
Smp_088950	Hypoxia up regulated protein 1	-0.167089	-0.407462	0.574551	4	-0.198341	0.784552	1.3071	0.0101758	1.10876	0.0366386	112.746	92.457	219.147
Smp_019340	Tetraspanin 3	-0.174343	-0.399154	0.573497	4	-0.162444	0.743952	1.35931	7.53618e-05	1.19687	0.000674703	151.339	126.305	304.983
Smp_900020	NADH dehydrogenase subunit 6	-0.22404	-0.349269	0.573309	8	-0.0657193	0.943298	1.44333	0.012689	1.37761	0.0204857	236.488	212.47	562.516
Smp_139520	eps8 protein	0.264927	-0.83785	0.572922	4	-1.33679	0.0756181	1.9456	0.00656156	0.608811	0.483748	7.05716	2.49774	9.89744
Smp_149360	trafficking protein particle complex subunit	-0.501838	-0.069874	0.571712	9	0.771666	0.00870185	0.968986	0.000630964	1.74065	2.7969e-10	105.209	169.391	312.397
Smp_136570	piezo type mechanosensitive ion channel	-0.225585	-0.345368	0.570954	8	0.00173168	1	1.42574	0.00650045	1.42747	0.00741749	10.0131	9.3383	24.4881
Smp_158780	#N/A	-0.125207	-0.445538	0.570745	4	-0.325951	0.434066	1.40684	1.97424e-05	1.08089	0.00141174	82.8972	61.6132	154.135
Smp_089930	serine:threonine protein phosphatase 2A	-0.276021	-0.294609	0.57063	9	0.13921	0.852272	1.224	0.0151504	1.36321	0.00727425	15.2439	15.9473	35.0242
Smp_213270	GOLGI SNAP receptor complex member, putative	-0.477362	-0.0923371	0.569699	9	0.687049	0.3322	1.08405	0.0847423	1.7711	0.00384456	10.5707	16.5612	34.011
Smp_199990	#N/A	-0.352089	-0.21717	0.569259	9	0.294393	0.6298	1.07529	0.0223996	1.36968	0.00331637	22.138	25.9489	51.404
Smp_141080	DnaJ subfamily B 1	0.018367	-0.587521	0.569154	4	-0.719556	0.00192829	1.68808	6.58372e-15	0.968525	1.77669e-05	163.389	91.9278	280.608
Smp_156270	post gpi attachment to protein factor	0.0716296	-0.639814	0.568185	4	-0.854708	0.0500314	1.69989	2.184e-05	0.84518	0.0562221	375.852	189.976	594.147
Smp_019940	hypothetical protein	-0.0383276	-0.529356	0.567684	4	-0.542706	0.171937	1.59195	3.46924e-06	1.04924	0.00378187	200.002	126.747	365.65
Smp_131220	tripeptidyl peptidase 2	-0.180213	-0.386833	0.567046	8	-0.15894	0.885614	1.45798	0.0480467	1.29904	0.0914942	2.2236	1.92973	5.17244
Smp_192610	hypothetical protein	1.79925	-2.36609	0.566842	15	-5.31491	9.49129e-14	3.75928	4.75935e-07	-1.55563	0.0221562	119.185	1.93737	34.4373
Smp_054310	membrane bound transcription factor site 2	-0.39064	-0.175515	0.566155	9	0.413968	0.54485	1.00663	0.0720328	1.42059	0.00943721	38.884	48.6385	94.977
Smp_152220	hypothetical protein	-0.570482	0.0044042	0.566078	9	0.971323	0.0850672	0.713222	0.214682	1.68454	0.00151579	12.7227	23.787	37.2168
Smp_145250	hypothetical protein	-0.20942	-0.356499	0.565919	9	-0.0748326	0.894636	1.29431	0.000239245	1.21948	0.00067151	35.6166	31.9285	73.1123
Smp_092770	Coatomer subunit gamma	-0.145922	-0.419927	0.56585	4	-0.263954	0.257862	1.45619	1.14213e-14	1.19224	6.12685e-10	133.355	104.067	268.202
Smp_020340	alpha glucosidase	1.3338	-1.89897	0.565167	15	-4.39364	9.81065e-20	3.2861	3.90529e-11	-1.10753	0.0289512	38.0308	1.54558	15.1302
Smp_003980	family C2 unassigned peptidase (C02 family)	-0.478016	-0.0860627	0.564079	9	0.68476	0.0778595	0.895283	0.015479	1.58004	7.84913e-06	49.9872	75.6342	133.584
Smp_017290	hypothetical protein	-0.136363	-0.427269	0.563632	4	-0.295316	0.537559	1.4799	4.38576e-05	1.18458	0.00156198	138.11	105.448	278.597
Smp_184280	#N/A	0.172409	-0.736035	0.563626	4	-1.11409	0.0674124	1.90504	0.000770015	0.790952	0.226467	302.481	127.934	459.131
Smp_156480	hypothetical protein	1.45429	-2.01766	0.563372	15	-4.49546	5.16893e-11	3.32605	2.72656e-06	-1.16941	0.119475	21.7899	0.724009	8.16697
Smp_176440	protein kinase	-0.439702	-0.123091	0.562793	9	0.565967	0.25294	1.05479	0.0165149	1.62076	0.000143204	35.2714	49.9705	97.8383
Smp_093840	tetraspanning orphan receptor	-0.0295588	-0.531301	0.560859	4	-0.58413	0.0597089	1.53598	3.18541e-08	0.951848	0.00117207	520.651	324.443	891.252
Smp_053030	vacuolar protein sorting 36	-0.223768	-0.336858	0.560626	8	-0.00648346	0.997828	1.35595	0.00661309	1.34947	0.00795178	15.4608	14.3943	35.2942
Smp_009650	mitochondrial processing peptidase beta subunit	-0.361689	-0.198411	0.5601	9	0.342841	0.535303	1.09637	0.0124061	1.43921	0.000852286	312.741	372.477	761.897
Smp_149150	diazepam binding inhibitor	-0.268504	-0.290826	0.559331	8	0.0917072	0.812863	1.25885	5.34616e-07	1.35056	9.10144e-08	135.08	134.514	304.387
Smp_089000	translocon associated protein subunit delta	0.0785748	-0.637462	0.558887	4	-0.860813	0.0589748	1.78075	1.86032e-05	0.919933	0.044342	828.672	419.024	1383.57
Smp_149810	hypothetical protein	0.0488134	-0.607616	0.558803	4	-0.781355	0.159041	1.67077	0.000757272	0.889417	0.102983	53.1114	28.395	87.9194
Smp_153560	RING finger protein B (Protein rngB)	-0.419975	-0.137956	0.557931	9	0.497788	0.560443	1.05875	0.138898	1.55654	0.025394	13.9416	19.06	39.0933
Smp_006750	DNA damage regulated autophagy modulator protein	-0.140019	-0.417498	0.557517	4	-0.235684	0.724879	1.38377	0.00415398	1.14809	0.0223034	69.9508	54.4822	137.711
Smp_093820	glutamate dehydrogenase	-0.876936	0.319914	0.557022	13	1.83981	1.29141e-11	0.353467	0.27478	2.19328	5.9608e-16	130.183	441.934	531.878
Smp_900090	NADH dehydrogenase subunit 4	-0.136038	-0.420744	0.556782	4	-0.266776	0.554326	1.4825	1.14471e-05	1.21572	0.000494186	1235.62	966.175	2525.4
Smp_156260	#N/A	0.174243	-0.729863	0.555621	4	-1.1325	0.0193096	1.90219	3.29307e-05	0.769688	0.137188	284.729	119.346	432.299
Smp_160970	hypothetical protein	-1.07172	0.51616	0.555565	13	2.36215	8.65837e-10	0.103356	0.856257	2.4655	2.26892e-10	12.6192	63.7577	64.2164
Smp_212570	disco interacting protein 2 (dip2)	-0.0164729	-0.539089	0.555562	4	-0.561243	0.501493	1.51291	0.0264941	0.951666	0.205347	34.8708	21.8229	60.1059
Smp_053460	GPI mannosyltransferase 3	-0.402848	-0.150921	0.55377	9	0.482778	0.526918	1.14592	0.0655701	1.6287	0.00795958	5.74738	7.66893	16.7573
Smp_196720	atpase class vi type c	-0.310357	-0.242374	0.552731	9	0.196807	0.774796	1.07761	0.028572	1.27442	0.00978366	31.0383	33.7642	67.8257
Smp_137580	helicase ski2w	-0.234037	-0.317047	0.551084	9	0.0215316	0.985464	1.151	0.0528794	1.17253	0.0543907	21.5225	20.4381	44.554
Smp_064200	ocrl type II inositol 5 phosphatase	-0.090241	-0.460265	0.550506	9	-0.350049	0.727766	1.35824	0.0743714	1.00819	0.22013	28.9708	21.567	52.9851
Smp_149180	TRAF type zinc finger domain containing protein	-0.668268	0.118069	0.550199	13	1.2134	0.02055	0.602083	0.292852	1.81549	0.000336459	173.069	389.885	564.615
Smp_168140	hypothetical protein	1.04917	-1.59899	0.549821	2	-3.49157	1.73944e-10	2.81364	8.52286e-07	-0.677931	0.267651	68.9891	5.01718	36.5874
Smp_126770	Islet cell autoantigen 1	0.235561	-0.785251	0.549691	4	-1.34463	1.39939e-07	1.97107	2.80929e-15	0.626439	0.0248318	155.17	56.8094	212.461
Smp_157160	signal recognition particle 68 kDa protein	-0.644382	0.0948082	0.549574	13	1.15303	0.000945151	0.756071	0.0379303	1.9091	1.53651e-08	69.2703	146.316	234.781
Smp_121880	hypothetical protein	-0.155535	-0.393191	0.548726	4	-0.20155	0.53637	1.43013	2.30585e-09	1.22858	4.86109e-07	98.96	80.1905	204.867
Smp_143360	kelch domain containing protein	-0.208517	-0.339858	0.548375	9	-0.0927208	0.938056	1.31493	0.0935935	1.22221	0.135212	13.1177	11.8378	28.5255
Smp_153840	neurobeachin	0.122381	-0.670034	0.547653	4	-0.978229	0.0297507	1.85915	8.93518e-06	0.880924	0.0564101	11.9731	5.59922	19.5979
Smp_155550	serine protease inhibitors serpins	-0.624075	0.0784339	0.545641	9	1.10365	0.000291063	0.674468	0.0338631	1.77812	2.33096e-09	37.0019	75.3176	113.624
Smp_086900	ADP ribosylation factor protein 1 like	-0.0369016	-0.507399	0.544301	4	-0.528039	0.279427	1.50637	0.000271885	0.978329	0.0268936	261.883	166.634	457.915
Smp_204120	hypothetical protein	1.1047	-1.64898	0.544281	15	-3.07197	0.00402072	2.37992	0.0320969	-0.692048	0.610374	4.81054	0.338941	2.38649
Smp_164260	hypothetical protein	-0.148571	-0.395135	0.543706	9	-0.129728	0.923755	1.15601	0.222708	1.02628	0.306918	5.41707	4.62256	10.4894
Smp_140660	centrosomal protein of 135 kda	1.18973	-1.73335	0.543615	15	-3.68183	7.31901e-06	2.76159	0.00120879	-0.920241	0.353446	23.9776	1.34842	10.5842
Smp_169040	lysophospholipid acyltransferase 5	-0.393924	-0.149627	0.543551	9	0.462865	0.717215	0.782532	0.47331	1.2454	0.239631	15.9611	21.7676	36.2292
Smp_099850	divalent metal transporter DMT1B	-0.0880064	-0.455184	0.543191	4	-0.364245	0.406465	1.45602	3.3145e-05	1.09177	0.00280716	49.1022	35.3457	92.1994
Smp_071770	rna exonuclease 1	-0.219134	-0.32389	0.543024	8	0.00167366	1	1.29684	0.000113738	1.29851	0.000131606	23.5063	22.1283	51.6486
Smp_016130	mitochondrial import inner membrane translocase	-0.49057	-0.0522247	0.542795	9	0.75663	0.025965	0.875149	0.00785408	1.63178	2.68335e-07	151.138	239.666	415.704
Smp_199660	LOK-like protein kinase	-0.158429	-0.383573	0.542002	9	-0.127813	0.932291	1.08885	0.307745	0.96104	0.400163	4.84498	4.12681	8.99526
Smp_020360	hypothetical protein	0.0429043	-0.583476	0.540571	4	-0.765757	1.45904e-05	1.64967	1.61972e-22	0.883912	3.95352e-07	598.271	328.189	970.739
Smp_154960	transmembrane emp domain containing protein	-0.0944965	-0.446004	0.540501	4	-0.361088	0.535303	1.5418	0.000572567	1.18072	0.0117085	181.039	131.094	364.834
Smp_198680	protein unc 45 A	-0.314619	-0.2256	0.54022	9	0.217151	0.800418	1.18628	0.0526853	1.40344	0.0224244	10.1234	11.3485	24.8748
Smp_153480	solute carrier family 12	-0.0261894	-0.514018	0.540208	4	-0.509369	0.534285	1.45557	0.0270822	0.946197	0.190442	33.4132	22.0596	57.5405
Smp_047330	hypothetical protein	0.194672	-0.73404	0.539368	4	-1.20618	0.0119458	2.04989	6.36261e-06	0.843708	0.098505	65.4962	26.0009	105.686
Smp_134430	#N/A	0.967575	-1.50642	0.538846	2	-3.24494	1.92948e-07	2.8167	1.00476e-05	-0.42824	0.600317	7.9383	0.701843	5.1536
Smp_185340	hypothetical protein	-0.575486	0.0367554	0.538731	9	0.946743	0.202163	0.935613	0.189037	1.88236	0.00538701	12.0131	22.6722	42.5647
Smp_004200	PPPDE peptidase domain containing protein	-0.126262	-0.412309	0.53857	4	-0.269348	0.587943	1.32439	0.000421458	1.05504	0.00685664	79.2206	61.7762	145.697
Smp_157520	zinc finger protein zas	-0.111718	-0.425381	0.537099	4	-0.290188	0.78446	1.43128	0.0632229	1.14109	0.164796	5.40698	4.24925	11.0875
Smp_143350	transcription elongation factor b polypeptide 3	-0.244847	-0.291946	0.536793	9	0.0606542	0.944597	1.08455	0.0522661	1.1452	0.0444172	13.9781	13.8131	28.0247
Smp_089550	eukaryotic translation initiation factor	-0.444766	-0.0918983	0.536664	9	0.592584	0.324455	1.10907	0.034742	1.70165	0.000903031	58.3999	84.9326	176.859
Smp_144890	cyclic AMP responsive element binding protein	0.139346	-0.675614	0.536268	4	-0.947074	0.231632	1.56692	0.0305935	0.619846	0.472721	14.9962	6.72066	20.3222
Smp_130580	disabled 2	1.11359	-1.64951	0.535923	15	-3.70701	5.33156e-10	2.89379	2.09064e-06	-0.813223	0.259441	156.214	10.1847	77.1366
Smp_198470	hypothetical protein	-0.193083	-0.342673	0.535756	9	-0.0403703	0.978047	1.27288	0.119692	1.23251	0.14655	105.099	93.9157	233.624
Smp_034410	cathepsin F (C01 family)	-0.231037	-0.303512	0.534549	9	0.0328073	0.950372	1.18637	0.000152493	1.21918	0.000113395	118.651	113.133	245.047
Smp_068230	#N/A	-0.525247	-0.00889187	0.534139	9	0.808108	0.379311	0.852997	0.327623	1.66111	0.0417943	20.8315	36.9943	62.1149
Smp_080210	alpha tocopherol transfer protein	1.20557	-1.73966	0.534095	15	-4.01567	9.84078e-19	3.05635	5.9375e-11	-0.959322	0.0515324	109.645	5.90873	49.0193
Smp_155970	Two pore potassium channel protein sup 9	1.45196	-1.98532	0.533365	15	-3.82512	0.000260226	2.64027	0.016335	-1.18485	0.343104	27.3438	0.928539	9.02487
Smp_144850	oxysterol binding protein 1	0.367191	-0.899329	0.532138	4	-1.65986	0.0011091	1.84322	0.00026022	0.183361	0.800182	144.789	41.7728	146.597
Smp_210730	prolyl oligopeptidase (S09 family)	0.30739	-0.839014	0.531624	4	-1.48128	0.00150631	1.93436	2.11122e-05	0.453086	0.430028	76.0881	24.8541	93.1648
Smp_054360	Adenine phosphoribosyltransferase, catalyzes the	-0.49985	-0.0310024	0.530853	9	0.791819	0.0824373	0.915675	0.0376199	1.70749	4.21597e-05	353.418	578.17	1035.23
Smp_103200	V type proton ATPase subunit D	0.190226	-0.719578	0.529352	4	-1.17963	1.65284e-12	1.8343	6.62142e-29	0.654668	0.000166681	371.169	152.915	514.801
Smp_170120	fos transcription factor	-0.446572	-0.0817858	0.528358	9	0.627575	0.344412	0.800071	0.191742	1.42765	0.0146255	28.48	42.1238	70.4103
Smp_149790	hypothetical protein	0.0932474	-0.621514	0.528266	4	-0.866791	0.125388	1.60978	0.00180246	0.742988	0.205128	85.6794	43.0705	128.164
Smp_006990	eukaryotic translation initiation factor 5b	-0.384903	-0.141967	0.52687	9	0.430085	0.503475	1.0713	0.0425864	1.50138	0.00374456	28.3102	36.373	73.6195
Smp_211060	acylaminoacyl peptidase (S09 family)	-0.607911	0.0813507	0.52656	9	1.08316	0.0628083	0.628244	0.298372	1.71141	0.0023739	2.5601	5.19944	7.67887
Smp_194630	#N/A	-0.234801	-0.291609	0.52641	9	0.0800626	0.951817	1.03696	0.254071	1.11702	0.231971	2.5841	2.68808	5.33304
Smp_150360	ubiquitin protein ligase edd	-0.825831	0.299515	0.526316	13	1.68438	2.81836e-05	0.445077	0.347836	2.12945	9.92601e-08	9.01772	28.7459	36.1314
Smp_067780	hypothetical protein	-0.178306	-0.347592	0.525898	8	-0.0946853	0.891635	1.32703	0.0027065	1.23234	0.00654946	58.5499	51.2484	123.305
Smp_151690	translation initiation inhibitor	-0.108856	-0.416979	0.525835	4	-0.282993	0.640297	1.42133	0.00164719	1.13834	0.0155242	105.72	80.6445	208.139
Smp_126240	twitchin	1.20887	-1.73433	0.525455	15	-4.02635	2.49013e-18	3.20066	8.94377e-12	-0.825691	0.115928	8.83605	0.474385	4.34705
Smp_214140	hypothetical protein	-0.0639028	-0.461471	0.525373	4	-0.436131	0.220412	1.4075	3.12897e-06	0.971367	0.00214592	186.403	128.114	323.373
Smp_147790	homothorax homeobox protein	0.141806	-0.66695	0.525144	4	-0.963599	0.155818	1.62657	0.00893578	0.66297	0.365065	26.755	12.4826	38.1828
Smp_061940	adenylate kinase	-0.169303	-0.355338	0.52464	4	-0.140481	0.807235	1.37056	0.000378656	1.23008	0.00183885	326.047	275.676	680.296
Smp_043150	calnexin	0.019776	-0.544213	0.524437	4	-0.680949	0.0963079	1.5548	2.23466e-05	0.873854	0.0283664	404.872	235.147	659.208
Smp_123290	cGMP dependent protein kinase	0.0969293	-0.620503	0.523574	4	-0.830523	0.237858	1.56739	0.0126542	0.736866	0.309052	51.4131	26.3975	75.9447
Smp_003140	sorting nexin 32	0.124422	-0.646796	0.522373	4	-0.927051	0.128195	1.72934	0.00183225	0.80229	0.203857	66.2943	32.0818	103.885
Smp_170150	hypothetical protein	0.784956	-1.30715	0.522196	2	-2.67365	0.000108621	2.31601	0.00110114	-0.357646	0.702958	19.4698	2.50443	12.9804
Smp_169690	coatomer subunit epsilon	-0.0363684	-0.485658	0.522026	4	-0.505767	0.339611	1.52452	0.000566654	1.01875	0.0310065	366.026	239.239	660.178
Smp_160460	zinc finger protein 541	-0.114312	-0.407274	0.521586	4	-0.272682	0.724614	1.507	0.00722375	1.23431	0.0353422	11.6975	9.17748	25.0911
Smp_000350	hypothetical protein	2.04476	-2.56592	0.52116	15	-5.40123	6.85049e-10	3.70374	6.07216e-05	-1.69749	0.0464382	14.3789	0.150565	3.6973
Smp_156000	oxysterol binding protein 9	0.046717	-0.567588	0.520871	4	-0.738147	0.235675	1.52022	0.00583927	0.782073	0.208285	59.3447	32.921	92.7281
Smp_037530	ThioRedoXin (see also xtr) family member	-0.179283	-0.33977	0.519053	8	-0.0931643	0.913501	1.43097	0.00883006	1.33781	0.0169743	42.8357	37.0275	99.8297
Smp_166040	ATP binding cassette sub family F	-0.552877	0.0339046	0.518973	9	0.918602	0.158811	0.639876	0.340375	1.55848	0.0103796	15.08	27.4101	41.4478
Smp_008320	3'(2'), 5' bisphosphate nucleotidase	0.111625	-0.629865	0.51824	4	-0.902937	0.0468094	1.63446	0.000106203	0.731521	0.124678	164.854	80.4965	241.673
Smp_210430	ras protein Rab 1A	0.0534887	-0.571557	0.518068	4	-0.739573	0.0134586	1.60255	6.90017e-09	0.862975	0.00374456	1925.18	1067.35	3065.55
Smp_125870	armadillo repeat containing protein 8	-0.198425	-0.319023	0.517448	9	0.00818066	0.998464	1.25372	0.0839937	1.2619	0.0906743	8.24097	7.78153	18.1884
Smp_035010	chibby 1	0.230172	-0.747362	0.517189	4	-1.16485	0.121421	1.74196	0.0139834	0.577105	0.498957	27.0881	10.9373	36.0749
Smp_170260	hypothetical protein	-0.344333	-0.172427	0.51676	9	0.33801	0.759445	1.10377	0.193749	1.44178	0.0876364	7.97324	9.84261	20.8994
Smp_165000	DOT1, histone H3 methyltransferase	-0.18643	-0.330021	0.516451	9	-0.0917316	0.920277	1.23803	0.0408525	1.1463	0.0677893	14.0163	12.7387	28.3885
Smp_212760	kinesin, putative	0.52043	-1.03633	0.515901	4	-1.9326	0.0373423	2.12668	0.0206218	0.194072	0.880522	2.40402	0.503049	2.50972
Smp_033350	peptide N(4) (N acetyl beta	-0.182258	-0.333262	0.51552	8	-0.0850118	0.860125	1.35206	8.64358e-06	1.26705	4.06041e-05	69.3719	61.0663	148.051
Smp_075810	pcd6 interacting protein	-0.105527	-0.40997	0.515497	4	-0.301563	0.610818	1.3984	0.00182086	1.09683	0.0194315	12.6451	9.60153	24.3444
Smp_169180	E3 ubiquitin protein ligase HECTD1	0.282033	-0.797181	0.515149	4	-1.37192	0.0104732	1.94134	0.000170935	0.569419	0.363013	9.83837	3.4595	13.0536
Smp_130810	dynein heavy chain	1.32792	-1.84241	0.514488	15	-3.84543	1.12333e-05	3.19436	0.000408062	-0.651067	0.554144	2.04893	0.0877656	1.1418
Smp_179810	oncosphere protein tso22e	1.10546	-1.61919	0.513732	2	-3.77953	3.2312e-25	3.02385	2.07191e-16	-0.755677	0.0713186	488.322	31.9674	254.059
Smp_139070	rho GTPase activating protein 17	-0.262761	-0.250783	0.513544	9	0.0986102	0.926944	1.08235	0.139982	1.18096	0.114145	16.3495	16.9084	34.5882
Smp_114620	adenosinetriphosphatase	1.11472	-1.62808	0.51336	15	-3.69303	7.42683e-19	2.97492	3.73806e-12	-0.718109	0.116569	416.678	28.5346	217.503
Smp_213540	hypothetical protein	-0.726056	0.212763	0.513292	13	1.47035	0.000947524	0.456236	0.368703	1.92658	1.40587e-05	15.2709	41.0362	52.8646
Smp_145810	poly (adp ribose) polymerase 2	-1.87477	1.3615	0.513266	13	4.74911	2.46002e-44	-1.1757	0.000513138	3.5734	1.36091e-24	5.95722	159.439	65.4075
Smp_023230	protein yifb	-0.510173	-0.00306117	0.513234	9	0.864832	0.0170322	0.719988	0.0501346	1.58482	3.94386e-06	157.553	269.577	420.818
Smp_900000	cytochrome c oxidase subunit I	-0.163292	-0.347895	0.511187	4	-0.125434	0.86628	1.35031	0.00583077	1.22487	0.0152844	615.712	523.264	1290.04
Smp_052750	Pre mRNA splicing regulator female lethal(2)D	-0.365184	-0.14524	0.510424	9	0.456848	0.59318	0.915963	0.200659	1.37281	0.0505487	7.24134	9.55069	17.4079
Smp_046880	phosphatidylinositol	-0.435226	-0.075141	0.510367	9	0.677384	0.396321	0.872416	0.232021	1.5498	0.0264579	5.85568	9.02738	15.8732
Smp_096840	#N/A	0.298979	-0.809307	0.510328	4	-1.42897	0.000524846	1.86264	4.4993e-06	0.433671	0.382741	132.806	44.9786	158.543
Smp_008070	thioredoxin	-0.195426	-0.314654	0.510081	9	-0.0295533	0.97138	1.26259	0.00553561	1.23304	0.00795247	1790.68	1632.41	3762.12
Smp_126600	hypothetical protein	0.31676	-0.825899	0.509139	4	-1.4545	0.000878438	1.78508	3.71053e-05	0.330578	0.55454	9.28239	3.14749	10.2651
Smp_134860	translational activator gcn1	-0.476117	-0.0324989	0.508616	9	0.759535	0.147567	0.837836	0.0973006	1.59737	0.000794116	7.9332	12.9944	21.9055
Smp_152370	ADP ribosylation factor GTPase activating	0.239479	-0.747891	0.508412	4	-1.27215	6.35056e-10	1.84786	5.26751e-20	0.575705	0.00994129	286.312	110.359	373.925
Smp_043940	synaptosomal associated protein 29	0.264384	-0.772074	0.507691	4	-1.34623	1.34738e-08	1.89917	5.91184e-16	0.55294	0.0311899	122.75	44.9088	159.166
Smp_194760	hypothetical protein	-0.0153258	-0.492316	0.507641	4	-0.543421	0.0953185	1.38182	1.80257e-06	0.838394	0.00672463	588.139	379.716	932.106
Smp_169010	hypothetical protein	-0.885454	0.377942	0.507513	13	1.7441	0.0108584	0.193729	0.832365	1.93783	0.00544348	3.9492	13.5921	14.6821
Smp_099240	Protein VTS1	0.179294	-0.686043	0.506749	4	-1.09006	0.125511	1.83177	0.00527767	0.741715	0.332768	18.6742	8.05222	28.7446
Smp_194680	hypothetical protein	-0.282576	-0.223976	0.506552	9	0.243255	0.669707	1.04099	0.0154382	1.28424	0.00258814	167.17	187.094	359.934
Smp_029990	dedicator of cytokinesis protein	-0.403122	-0.103256	0.506378	9	0.484125	0.554326	0.888925	0.202319	1.37305	0.0429664	2.53477	3.53596	6.15991
Smp_143470	spectrin beta chain	-0.172211	-0.333796	0.506007	9	-0.122689	0.81379	1.19629	0.000609444	1.07361	0.00272398	37.1051	32.2708	69.7156
Smp_140190	G protein coupled receptor fragment	1.91163	-2.4172	0.505575	15	-4.40515	8.83946e-05	2.6999	0.0253002	-1.70525	0.175887	20.1958	0.285902	4.11798
Smp_165380	rabphilin	0.894709	-1.40015	0.505436	2	-2.62952	0.0092215	2.51318	0.0139498	-0.116331	0.938501	6.94239	0.74297	5.671
Smp_196020	GPI transamidase component PIG S	-0.348031	-0.156378	0.504409	9	0.445257	0.504075	0.797852	0.164162	1.24311	0.0254982	9.69893	12.5877	20.6313
Smp_082800	vesicle protein sorting associated	-0.241983	-0.262025	0.504009	9	0.103694	0.69624	1.07929	3.41457e-09	1.18299	1.21794e-10	73.1354	74.1603	145.917
Smp_203100	hypothetical protein	-1.08894	0.585047	0.503897	13	2.35239	0.000319569	-0.217655	0.803916	2.13474	0.00184838	13.4157	70.5072	56.4911
Smp_180900	80 kDa MCM3 associated protein	-0.46484	-0.0377117	0.502552	9	0.680328	0.33189	0.824199	0.205516	1.50453	0.015532	2.82195	4.48835	7.42664
Smp_141720	3-keto-dihydrosphingosine reductase	-0.0366174	-0.465904	0.502522	4	-0.467554	0.171072	1.411	1.6513e-06	0.943443	0.00232392	178.854	120.119	304.148
Smp_213720	kynurenine oxoglutarate transaminase 3	-0.0833545	-0.418712	0.502067	4	-0.321638	0.680027	1.54028	0.00795996	1.21864	0.0451372	16.9494	12.4737	35.8743
Smp_146010	insulysin unit 3 (M16 family)	-0.70966	0.207907	0.501753	13	1.39857	0.000104664	0.534264	0.183784	1.93284	6.01125e-08	16.2094	41.1126	55.6088
Smp_167170	ancient ubiquitous protein	-0.0753862	-0.425799	0.501185	4	-0.36553	0.55899	1.22334	0.0133746	0.857809	0.107586	217.419	157.212	354.739
Smp_147990	cyclic AMP dependent transcription factor ATF 6	-0.112686	-0.38845	0.501136	4	-0.265715	0.600011	1.28285	0.000813097	1.01713	0.0108907	77.2416	60.4082	139.041
Smp_031190	phospholipase A	1.68905	-2.18986	0.500809	15	-4.97601	5.87924e-12	3.38103	8.56823e-06	-1.59498	0.0294033	41.8454	0.853908	11.3907
Smp_158680	molybdopterin biosynthesis protein	-1.17298	0.672952	0.500026	13	2.70114	6.73017e-08	-0.211925	0.750852	2.48922	1.41863e-06	5.70625	37.4526	30.5164
Smp_197190	SEC23 interacting protein	-0.13398	-0.364419	0.498399	4	-0.206847	0.783696	1.39291	0.00827008	1.18607	0.0305287	16.6605	13.8648	34.3313
Smp_085780	hypothetical protein	-0.300444	-0.196856	0.4973	9	0.287655	0.440874	1.01466	0.000713573	1.30232	1.12833e-05	93.2186	105.748	202.819
Smp_046060	myosin heavy chain, non muscle	-0.512812	0.0160066	0.496805	9	0.879138	0.0429749	0.644231	0.150267	1.52337	0.000207112	17.9141	31.8416	46.6767
Smp_072870	alpha centractin	-0.140738	-0.355316	0.496054	4	-0.169674	0.597064	1.23226	1.33833e-07	1.06259	8.41977e-06	211.786	175.532	388.303
Smp_181370	hypothetical protein	0.241142	-0.736597	0.495455	4	-1.03898	0.373682	1.42302	0.186008	0.384038	0.779422	12.8167	5.27389	14.992
Smp_019280	cAMP dependent protein kinase R2	0.531577	-1.02684	0.495259	4	-2.03293	0.000722858	1.93004	0.0016146	-0.102887	0.908789	39.9448	8.69217	32.4688
Smp_091730	sorting nexin	0.342787	-0.837914	0.495126	4	-1.53523	7.41831e-07	1.84434	1.7558e-09	0.309105	0.436581	864.652	273.905	940.286
Smp_166120	vesicle transport protein got1b	-0.254155	-0.240805	0.494959	9	0.157657	0.777648	1.09466	0.00507599	1.25232	0.00133051	183.655	191.522	387.646
Smp_900070	cytochrome b	-0.162072	-0.331964	0.494036	9	-0.0881321	0.886403	1.20057	0.002386	1.11244	0.0061082	1262.38	1117.18	2397.84
Smp_141980	cAMP specific 3',5' cyclic phosphodiesterase 4D	1.26776	-1.76129	0.493531	15	-3.91037	9.22586e-09	3.08574	1.0895e-05	-0.824633	0.306221	18.5166	0.940995	8.94072
Smp_175450	hydrocephalus inducing protein	0.826316	-1.31882	0.492507	15	-2.66442	0.00123343	2.21393	0.00952557	-0.450495	0.677968	1.86898	0.236793	1.15062
Smp_182910	gag pol polyprotein	-0.332046	-0.16032	0.492366	9	0.326712	0.660683	1.10871	0.0548855	1.43542	0.0122051	6.79023	8.19024	17.0128
Smp_059690	NF kappa B inhibitor interacting Ras	0.0125054	-0.503921	0.491415	4	-0.613418	0.0142424	1.50116	6.67628e-11	0.887737	0.000237516	338.946	207.753	555.027
Smp_124390	patatin phospholipase domain containing protein	-0.431545	-0.0595583	0.491103	9	0.646793	0.0505245	0.690461	0.0329437	1.33725	1.37036e-05	32.9751	49.0187	73.6161
Smp_001410	glyoxalase domain containing protein 4	-0.473863	-0.0171901	0.491053	9	0.796045	0.022844	0.699559	0.047138	1.4956	5.81065e-06	134.18	217.207	335.321
Smp_200510	hypothetical protein	-0.260866	-0.229706	0.490572	9	0.149896	0.857922	1.12968	0.0476711	1.27957	0.026294	46.735	49.1244	104.339
Smp_012380	voltage gated potassium channel subunit beta 2	1.48867	-1.97882	0.490152	15	-4.56422	2.65803e-14	3.33484	1.08403e-07	-1.22938	0.037835	43.4374	1.4038	15.8501
Smp_179360	sortilin	0.254905	-0.744291	0.489386	4	-1.22179	0.0915247	1.67548	0.014612	0.453681	0.602669	44.7724	17.179	55.1241
Smp_157710	phosphoacetylglucosamine mutase	0.247629	-0.735869	0.488241	4	-1.27347	1.17658e-07	1.80933	1.69538e-14	0.535853	0.0444201	119.206	45.9532	151.154
Smp_129580	hypothetical protein	-0.0435723	-0.444545	0.488118	4	-0.42996	0.568566	1.45541	0.014511	1.02545	0.10825	7.02197	4.86087	13.1408
Smp_048990	beclin 1	-0.410191	-0.0772328	0.487424	9	0.540657	0.406036	0.88028	0.126215	1.42094	0.0104765	15.6285	21.9572	38.7224
Smp_141940	hypothetical protein	1.28632	-1.7736	0.487283	15	-3.98079	1.51342e-09	2.90509	2.23872e-05	-1.0757	0.146265	101.338	5.11206	40.5164
Smp_128730	protein transport protein Sec24A	-0.174602	-0.312645	0.487247	9	-0.0488047	0.947285	1.10046	0.0173466	1.05165	0.0268913	39.5429	36.0714	72.5837
Smp_162280	coproporphyrinogen III oxidase	-0.298542	-0.187469	0.486011	9	0.317739	0.524598	1.03532	0.00881339	1.35306	0.000523419	58.4055	67.7721	133.126
Smp_035210	multivalent antigen sj97 GAPDH	1.63609	-2.12202	0.485927	15	-4.86279	5.41766e-11	3.32635	1.42401e-05	-1.53644	0.0618818	51.77	1.18471	14.6757
Smp_152620	protein hook 3	0.221883	-0.707658	0.485775	12	-1.02508	0.425757	1.17928	0.327753	0.154197	0.922408	8.81565	3.49296	8.94675
Smp_172580	docking protein 3	0.64836	-1.13407	0.485707	4	-2.19939	0.00533887	2.1893	0.00568816	-0.0100905	0.997833	25.4957	4.44971	22.4092
Smp_213310	guanylate kinase, putative	0.059015	-0.543488	0.484473	4	-0.710415	0.130539	1.5471	0.000262387	0.836688	0.066396	41.1113	22.9261	65.9387
Smp_213640	hypothetical protein	-0.344683	-0.139127	0.48381	9	0.389337	0.689637	1.04114	0.180195	1.43048	0.0625803	5.78463	7.31544	14.7423
Smp_156900	transmembrane protein 208	-0.139843	-0.343543	0.483386	4	-0.144568	0.78784	1.21852	0.000896685	1.07395	0.00439039	88.4329	73.7153	165.062
Smp_074040	hypothetical protein	-0.951974	0.468607	0.483367	13	2.19854	3.7258e-17	-0.0173165	0.971479	2.18122	1.60835e-16	56.2446	245.165	226.028
Smp_026040	trafficking protein particle complex subunit	-0.322516	-0.160271	0.482786	9	0.351864	0.638667	1.00013	0.0932997	1.352	0.0216447	8.72767	10.7687	20.3692
Smp_154620	WD repeat containing protein 59	0.109069	-0.591407	0.482338	4	-0.816952	0.167489	1.53938	0.00421456	0.722426	0.234149	7.32434	3.77413	10.7012
Smp_049920	importin 9 (imp9) (ran binding protein	-0.275025	-0.207081	0.482106	9	0.196614	0.839997	1.15233	0.094428	1.34895	0.0520172	5.40264	5.87948	12.8396
Smp_202290	hypothetical protein	2.49764	-2.97971	0.482069	15	-5.43352	2.17202e-07	2.9251	0.0112443	-2.50842	0.0169743	12.2181	0.0563236	1.36381
Smp_157860	hypothetical protein	-0.466579	-0.0139321	0.480511	9	0.711993	0.417521	0.890966	0.268578	1.60296	0.0359665	3.70559	5.94983	10.8051
Smp_128680	sn1 specific diacylglycerol lipase beta	-0.230803	-0.248996	0.479799	9	0.117765	0.815184	0.97533	0.00463569	1.09309	0.00153451	21.6795	22.2383	40.4573
Smp_149280	kinase D interacting substrate of 220 kDa	1.2337	-1.71348	0.479783	15	-3.62687	7.08563e-06	2.84369	0.000730801	-0.783175	0.421542	6.39816	0.359182	3.09978
Smp_170430	D aspartate oxidase	1.01787	-1.49746	0.479585	2	-3.23221	2.29299e-07	2.71102	3.53712e-05	-0.521187	0.483229	19.2608	1.65942	11.5811
Smp_164590	fibrillar collagen chain FAp1 alpha	1.59368	-2.07304	0.479362	15	-4.90355	2.52606e-18	3.57567	6.02302e-10	-1.32788	0.0227957	23.3043	0.590812	7.98723
Smp_198010	arf GAP with GTPase, ANK repeat and PH	-0.230335	-0.248178	0.478513	9	0.0917544	0.877793	1.00497	0.010912	1.09672	0.00593716	16.1874	16.2005	30.6975
Smp_134470	calmodulin	0.316967	-0.795204	0.478236	4	-1.29782	0.134413	1.46901	0.0802282	0.171196	0.884232	79.2269	27.3447	78.1767
Smp_133210	lysosomal alpha glucosidase	1.32221	-1.80032	0.478104	15	-4.17953	7.12607e-15	2.9914	1.26096e-07	-1.18813	0.0267956	16.7655	0.769806	6.17458
Smp_158830	transmembrane protein 1:tmem1b	-0.120057	-0.357479	0.477536	9	-0.227833	0.810291	1.04947	0.132986	0.821632	0.274409	8.88778	7.18892	14.1111
Smp_146400	syntaxin binding protein 1	-0.145872	-0.331418	0.47729	9	-0.144378	0.745977	1.16456	0.000177662	1.02018	0.00134367	35.748	30.2865	63.8695
Smp_150170	Ras associated and pleckstrin y	1.00194	-1.47881	0.476869	15	-3.17751	2.15821e-05	2.43705	0.00178164	-0.740453	0.420935	18.4217	1.57972	9.39951
Smp_121790	39S ribosomal protein L13, mitochondrial	0.0789754	-0.555584	0.476609	4	-0.742173	0.0667822	1.55377	2.60262e-05	0.811593	0.044342	164.164	90.603	254.709
Smp_025410	calcium dependent mitochondrial carrier protein	0.585596	-1.06187	0.476274	4	-2.16002	9.00195e-09	2.22172	6.42621e-09	0.0616963	0.913911	107.445	21.5437	98.3104
Smp_137210	WD repeat containing protein 11	0.0203583	-0.496114	0.475755	4	-0.576122	0.473356	1.45489	0.0292243	0.878764	0.234986	16.883	10.5511	27.6182
Smp_126840	hypothetical protein	-0.282883	-0.192819	0.475703	9	0.289729	0.511268	0.896148	0.0112465	1.18588	0.000657382	42.2768	48.3835	85.1749
Smp_024150	UBX domain containing protein 2	-0.114097	-0.361248	0.475344	4	-0.2316	0.351633	1.23778	3.47462e-10	1.00618	6.40937e-07	209.062	167.058	370.029
Smp_148330	DENN domain containing protein 1A	0.550577	-1.02535	0.47477	4	-1.94065	0.0443724	1.7808	0.0678317	-0.159848	0.907293	8.77135	1.83778	6.88001
Smp_161640	transient receptor potential cation channel	1.04085	-1.51466	0.47381	2	-3.16419	4.87099e-05	2.81538	0.000480331	-0.348811	0.73278	9.33363	0.748478	6.59141
Smp_173280	peptidyl prolyl cis trans isomerase H	-0.263807	-0.20939	0.473196	9	0.190282	0.846206	1.27894	0.0602474	1.46922	0.0321883	11.5719	12.523	30.211
Smp_015050	choline/ethanolamine kinase	-0.00936297	-0.463796	0.473159	4	-0.511109	0.188017	1.37916	4.29232e-05	0.86805	0.0159914	135.987	89.2454	220.811
Smp_149200	dynactin subunit 1	0.0146715	-0.487686	0.473014	4	-0.588835	0.453319	1.3587	0.0397955	0.769862	0.301956	47.4715	29.4269	73.7663
Smp_147220	formin binding protein 1	-0.195635	-0.277367	0.473001	9	0.067003	0.946201	0.978029	0.136928	1.04503	0.120008	10.301	10.077	19.2801
Smp_125640	syntaxin 12	0.411131	-0.88301	0.471879	4	-1.7183	1.19167e-09	1.93881	4.94684e-12	0.220514	0.563658	457.429	127.649	469.116
Smp_019880	Der1 domain family	-0.165169	-0.306671	0.471839	9	-0.0471788	0.950385	1.21158	0.00971778	1.1644	0.0153132	192.332	172.214	384.125
Smp_162230	microtubule associated protein tau	0.728477	-1.19946	0.470987	2	-2.51767	3.76393e-05	2.15991	0.000513138	-0.357765	0.66758	321.98	48.3218	220.836
Smp_166380	hypothetical protein	0.499412	-0.970008	0.470595	4	-1.77902	0.0447603	1.77627	0.0443737	-0.00274933	1	14.2367	3.49846	12.2136
Smp_169820	gamma tubulin complex component 6	-0.134268	-0.335606	0.469874	9	-0.155081	0.873643	1.3619	0.0382998	1.20682	0.078918	9.08393	7.76565	19.2089
Smp_180160	Rho GTPase activating protein 12	-0.0583437	-0.411477	0.469821	4	-0.382174	0.536206	1.22197	0.012739	0.839792	0.112883	70.367	50.1305	112.88
Smp_181080	hypothetical protein	1.6168	-2.08633	0.469522	15	-4.65044	9.57285e-09	3.18237	0.000171296	-1.46807	0.100936	17.9607	0.464479	5.27107
Smp_017010	hypothetical protein	-0.40104	-0.067357	0.468397	9	0.629557	0.2056	0.859913	0.0631957	1.48947	0.000746827	26.7909	38.8156	67.5
Smp_100070	RWD domain containing protein 2B	-0.295055	-0.171531	0.466587	9	0.315498	0.228301	0.900556	5.75873e-05	1.21605	4.74158e-08	76.6097	89.7598	156.644
Smp_164960	phosphatidylinositol 4,5 bisphosphate 3 kinase	0.232931	-0.698624	0.465694	4	-1.16203	0.0274758	1.63381	0.00123874	0.471786	0.452405	28.8721	11.7989	35.6586
Smp_025740	Rho GTP binding protein RhoU	0.251812	-0.717342	0.46553	4	-1.24861	5.02373e-05	1.59886	1.31573e-07	0.350253	0.351687	251.464	97.8536	281.789
Smp_029060	hexaprenyldihydroxybenzoate methyltransferase	0.103514	-0.568954	0.465439	4	-0.789337	0.105545	1.52653	0.000658906	0.737189	0.13502	25.7237	13.6144	37.8575
Smp_164010	serine:threonine protein phosphatase 6	0.160378	-0.625757	0.46538	4	-0.884695	0.345841	1.43378	0.0900414	0.549081	0.591454	15.6324	7.67577	20.3846
Smp_079770	Probable protein disulfide-isomerase ER-60	-0.204415	-0.260629	0.465044	9	0.0521072	0.938056	1.04759	0.0137122	1.0997	0.0106286	856.83	827.472	1637.77
Smp_212360	GRAM domain containing protein 1A	0.0251164	-0.489822	0.464705	4	-0.609661	0.226334	1.31536	0.0031618	0.705698	0.155373	46.4592	28.3247	67.6678
Smp_161450	small conductance calcium activated potassium	0.872262	-1.33617	0.463904	2	-2.78312	0.000640927	2.4408	0.0032517	-0.342323	0.765785	29.0543	3.30416	20.0801
Smp_176770	dedicator of cytokinesis protein	-0.349016	-0.113688	0.462704	9	0.447584	0.662112	0.743261	0.402814	1.19085	0.164796	1.19847	1.62506	2.61077
Smp_129230	trypsin-like serine protease	1.49889	-1.96134	0.46245	15	-4.25721	5.54383e-07	2.84447	0.00150862	-1.41273	0.139566	45.3579	1.435	13.3849
Smp_203480	Ufm1 specific protease 2	-0.417871	-0.043266	0.461137	9	0.659581	0.121813	0.717297	0.0821406	1.37688	0.000398089	74.1115	110.623	172.396
Smp_177060	Protein TRC8	-0.302136	-0.158332	0.460468	9	0.332322	0.346146	0.796924	0.00825471	1.12925	0.000125327	74.608	88.8629	144.591
Smp_160620	subfamily M12B unassigned peptidase	0.283305	-0.74356	0.460255	4	-1.21606	0.116945	1.74214	0.0166998	0.526087	0.563917	29.827	11.5331	38.0226
Smp_042990	protein FAM63B	-0.225416	-0.23447	0.459885	9	0.135175	0.854504	0.996444	0.0495049	1.13162	0.027158	11.5601	12.0434	22.7689
Smp_214170	protein KRI1	0.0321277	-0.491839	0.459712	4	-0.611113	0.454652	1.60991	0.0175144	0.998794	0.17998	15.3147	9.28918	28.3789
Smp_064520	mitotic spindle associated MMXD complex subunit	0.175503	-0.635077	0.459575	4	-0.9877	0.122264	1.48025	0.0149086	0.492554	0.497534	22.4412	10.3441	27.8918
Smp_152080	hypothetical protein	-0.784305	0.325322	0.458983	13	1.6764	0.000176256	0.172376	0.768336	1.84878	6.32705e-05	7.76916	23.9916	25.0682
Smp_157000	GTPase ObgE	0.435166	-0.893823	0.458658	4	-1.71554	9.67572e-05	1.84055	2.97836e-05	0.125009	0.847599	68.4127	18.6904	65.0497
Smp_202640	hypothetical protein	-0.254671	-0.203924	0.458595	9	0.194835	0.652008	0.97628	0.00242963	1.17111	0.00026662	160.029	172.767	322.462
Smp_139950	homocysteine responsive endoplasmic	-0.1467	-0.311688	0.458389	9	-0.116663	0.847058	1.0986	0.00696033	0.981942	0.0196582	263.787	227.608	467.522
Smp_076960	protein FAM102	-0.135004	-0.323149	0.458153	9	-0.12906	0.874609	1.19284	0.0304589	1.06378	0.0626684	8.90063	7.54485	16.9875
Smp_180500	phospholipid scramblase	0.779766	-1.23788	0.458113	2	-2.58314	0.000675743	2.2593	0.00428589	-0.323843	0.751356	19.6612	2.75129	13.7155
Smp_048550	cell polarity protein	-0.379591	-0.0784594	0.458051	9	0.518165	0.546237	0.830926	0.263795	1.34909	0.0608016	7.93195	11.1692	18.5881
Smp_158230	EF hand calcium binding domain containing protein	1.06853	-1.52556	0.457031	15	-3.41	6.09456e-10	2.69507	2.66193e-06	-0.714924	0.257562	11.718	0.93041	6.16413
Smp_175200	protein tapt1	-0.274408	-0.182003	0.456411	9	0.27826	0.744037	1.07377	0.0941986	1.35203	0.0349779	6.95095	8.09799	16.6203
Smp_136460	hypothetical protein	-0.104137	-0.352001	0.456138	9	-0.247746	0.745696	1.10331	0.052405	0.855569	0.160124	8.77192	7.08015	14.3431
Smp_040790	peptidyl prolyl cis trans isomerase B	-0.113789	-0.342099	0.455889	4	-0.177782	0.771941	1.21111	0.00475729	1.03333	0.0204604	1023.92	839.985	1862.58
Smp_150470	hypothetical protein	-0.17383	-0.281191	0.455021	9	-0.0183396	0.992751	1.02295	0.235785	1.00461	0.264226	6.83112	6.40524	12.6952
Smp_207010	signal recognition particle 72 kDa subunit	-0.155279	-0.299598	0.454877	9	-0.0849666	0.830142	1.19672	2.77613e-06	1.11175	1.82174e-05	130.004	116.132	249.752
Smp_085240	diacylglycerol pyrophosphate (phosphatidic acid) phosphatase 1	-0.125151	-0.328992	0.454143	9	-0.15117	0.78939	1.05353	0.00753162	0.902364	0.0275884	187.121	156.65	310.551
Smp_026260	RING finger protein 185	-0.166703	-0.287438	0.454141	9	-0.0224695	0.989901	1.04308	0.217988	1.02061	0.248199	70.5003	64.6185	135.267
Smp_040080	hypothetical protein	-0.137125	-0.316999	0.454123	9	-0.120403	0.674795	1.08496	7.35363e-08	0.964555	2.66677e-06	163.513	141.389	280.857
Smp_019100	EH domain containing protein 1	0.202582	-0.656366	0.453784	4	-1.09012	3.4557e-07	1.63736	5.16794e-15	0.547236	0.0183924	142.997	62.5325	183.302
Smp_023620	FERM domain containing protein 5	0.557031	-1.01037	0.453338	4	-2.08213	1.00304e-09	2.14817	2.82919e-10	0.0660403	0.901971	134.852	29.0827	123.398
Smp_075860	STT3, subunit of the oligosaccharyltransferase	-0.325728	-0.127459	0.453187	9	0.399893	0.332739	0.984601	0.00515382	1.38449	5.85012e-05	132.393	164.554	308.769
Smp_199120	protein FAM114A2	0.0544244	-0.507585	0.45316	4	-0.662313	0.327544	1.37131	0.0199852	0.708998	0.290655	107.335	62.8425	158.534
Smp_133150	oligomeric golgi complex subunit 5	-0.0411438	-0.411804	0.452948	4	-0.370004	0.508521	1.18994	0.0080437	0.819933	0.0885148	25.688	18.6245	39.9203
Smp_128250	hypothetical protein	1.18614	-1.63908	0.452933	15	-3.56352	4.5036e-06	2.68626	0.00100693	-0.87726	0.33443	4.9376	0.314215	2.24753
Smp_148200	junctophilin 2	1.44267	-1.89504	0.45237	15	-4.09155	2.00937e-06	3.00215	0.0007908	-1.08941	0.285078	19.3217	0.719602	7.42267
Smp_022810	ras protein Rab 2B	0.229238	-0.681491	0.452254	4	-1.16041	1.50252e-06	1.68602	1.04712e-12	0.525612	0.0480339	211.437	88.7699	268.09
Smp_199700	stromal cell derived factor 2	0.151357	-0.603394	0.452037	4	-0.906712	0.0565263	1.59165	0.000335917	0.684935	0.172428	93.1608	45.4086	133.087
Smp_212860	39S ribosomal protein L14, mitochondrial	-0.27869	-0.172979	0.451669	9	0.26689	0.778911	1.07921	0.128388	1.3461	0.0582794	12.2818	14.2072	29.4048
Smp_129980	hypothetical protein	-0.0465467	-0.405089	0.451636	4	-0.401874	0.57859	1.29134	0.0248173	0.889465	0.152049	18.7584	13.2887	31.865
Smp_030440	hypothetical protein	1.05767	-1.50661	0.44894	2	-3.41335	7.09627e-11	2.7885	1.96772e-07	-0.624849	0.326652	410.618	33.7343	231.323
Smp_213740	hypothetical protein	1.79286	-2.24176	0.448905	15	-4.6425	7.81244e-07	3.21065	0.00121779	-1.43185	0.165039	8.31538	0.157668	2.37033
Smp_123960	hypothetical protein	0.0154338	-0.464336	0.448902	4	-0.564077	0.455783	1.25494	0.0496633	0.690859	0.341857	8.35026	5.35093	12.2918
Smp_156790	hypothetical protein	1.42137	-1.86943	0.44806	15	-4.40291	4.09084e-15	3.09475	1.40716e-07	-1.30816	0.0210999	228.727	8.90628	78.7455
Smp_059350	der1 protein derlin	-0.13089	-0.31691	0.4478	9	-0.12248	0.841231	1.1274	0.00613397	1.00492	0.0181112	552.206	473.019	983.368
Smp_128950	tankyrase 1	-0.0935445	-0.353622	0.447167	4	-0.249245	0.569979	1.17494	0.000451796	0.925698	0.0078947	16.5908	13.3249	28.0835
Smp_034000	lysine specific demethylase 6a	-0.347011	-0.0998833	0.446895	9	0.492567	0.411742	0.84756	0.10805	1.34013	0.00836876	39.8685	53.8335	90.5681
Smp_002870	transmembrane protein 115	-0.258338	-0.188556	0.446894	9	0.229818	0.65679	0.918223	0.0198147	1.14804	0.00334197	75.2597	83.4322	148.832
Smp_159720	phospholipid translocating ATPase	-0.255308	-0.190755	0.446063	9	0.216109	0.744037	0.752388	0.139358	0.968497	0.0553646	13.9638	15.2005	24.3409
Smp_075770	hypothetical protein	1.65263	-2.09785	0.445224	15	-4.87642	3.57819e-11	3.24042	2.30234e-05	-1.636	0.0414192	145.833	3.52715	38.4479
Smp_157870	hypothetical protein	1.64467	-2.08984	0.445171	15	-4.50975	6.20949e-07	2.9288	0.00228699	-1.58096	0.111994	20.1706	0.507007	5.26613
Smp_126020	fumarate hydratase class I	-0.17985	-0.26513	0.444981	9	0.00392465	0.998699	1.03523	0.00331102	1.03916	0.00366302	123.745	116.11	225.339
Smp_133370	tetratricopeptide repeat protein 39B	1.0808	-1.52546	0.444663	15	-3.39064	6.33522e-08	2.57278	0.000100434	-0.81786	0.248015	16.2274	1.22085	7.72222
Smp_194590	vacuolar protein sorting associated protein 52	0.0959579	-0.539884	0.443926	4	-0.776421	0.0346952	1.43882	2.61479e-05	0.662403	0.083266	80.1318	43.7399	111.924
Smp_162980	rhodopsin orphan GPCR	1.029	-1.47271	0.443708	15	-3.31189	3.68906e-07	2.54381	0.000177662	-0.768085	0.322752	21.6023	1.79782	11.0329
Smp_007210	rab GTPase activating protein 1	0.381401	-0.825038	0.443637	4	-1.49107	0.0392697	1.66468	0.019359	0.173602	0.863025	14.6733	4.5738	14.4854
Smp_155700	mannose P dolichol utilization defect 1 protein	-0.143008	-0.299283	0.442292	9	-0.0853488	0.787594	1.05325	4.81295e-07	0.967902	5.21058e-06	169.971	150.798	291.425
Smp_089120	Oxysterol binding protein 11	0.0644653	-0.506582	0.442116	4	-0.634886	0.470048	1.36774	0.0661552	0.732853	0.390077	107.56	63.8319	161.759
Smp_140320	paxillin	0.393574	-0.835274	0.4417	4	-1.50427	0.0262312	1.63222	0.0169326	0.127949	0.893778	34.0234	10.4515	31.9844
Smp_128740	protein transport protein Sec24B	-0.23735	-0.204198	0.441548	9	0.216518	0.746624	1.07064	0.0293124	1.28715	0.00863797	52.3408	57.1436	113.436
Smp_150950	hypothetical protein	-0.284668	-0.156517	0.441185	9	0.241861	0.880501	0.707615	0.581446	0.949476	0.465602	93.8368	107.396	184.436
Smp_095090	solute carrier family 37	-0.177487	-0.263104	0.440591	9	-0.0166912	0.980644	1.07144	0.00295035	1.05474	0.00399246	139.196	128.26	258.614
Smp_174540	family M1 non peptidase ue (M01 family)	1.19444	-1.63496	0.440522	15	-3.46601	0.000167648	2.39553	0.0139562	-1.07048	0.324558	23.125	1.41455	8.77557
Smp_117810	v type proton atpase subunit h	0.468704	-0.909075	0.440371	4	-1.81707	1.20975e-06	1.85066	1.11169e-06	0.0335897	0.957251	201.844	52.2755	179.516
Smp_900110	NADH-ubiquinone oxidoreductase chain 1	-0.1686	-0.271135	0.439734	9	-0.0225826	0.974211	1.08805	0.00415952	1.06547	0.00593716	1484.28	1369.33	2743.11
Smp_047870	LIM domain kinase 1	0.0386788	-0.477808	0.439129	4	-0.618386	0.0290871	1.24268	2.33912e-06	0.62429	0.0298182	147.615	90.6171	201.29
Smp_170670	hypothetical protein	-0.04959	-0.389261	0.438851	9	-0.323013	0.802168	1.06451	0.282451	0.741498	0.504555	4.64473	3.49134	7.19144
Smp_006970	Rho GTPase activating protein 1	0.0744407	-0.512996	0.438555	4	-0.74151	0.0370812	1.35852	5.14449e-05	0.617007	0.0943844	31.6717	17.7146	42.7879
Smp_136580	exocyst complex component 7	-0.295683	-0.142856	0.438539	9	0.333813	0.599523	0.831696	0.109278	1.16551	0.0220739	85.6213	102.639	173.867
Smp_074150	annexin	1.58907	-2.02697	0.437903	15	-5.00069	4.13222e-43	3.45368	6.63777e-21	-1.54701	5.71869e-05	1170.02	32.5687	346.307
Smp_212030	hypothetical protein	-0.870962	0.433206	0.437756	10	1.79721	0.0422466	-0.180644	0.880714	1.61656	0.0824062	1.04179	3.96095	3.19213
Smp_134870	early growth response protein	1.00877	-1.44594	0.437172	15	-2.86294	0.00592474	2.02455	0.0640587	-0.838398	0.516471	18.6661	1.60568	8.39557
Smp_125730	hypothetical protein	1.51514	-1.95136	0.436216	15	-4.67501	3.74665e-15	3.22442	1.48184e-07	-1.4506	0.0235624	69.89	2.19722	21.608
Smp_127440	Serine rich adhesin for platelets	-0.0209646	-0.415149	0.436114	4	-0.421955	0.490993	1.20646	0.0155983	0.784501	0.150165	17.7876	12.3424	27.5532
Smp_163320	Ankyrin repeat domain containing protein	-0.277562	-0.15848	0.436042	9	0.307028	0.581114	0.713771	0.12106	1.0208	0.0233471	43.6791	50.9688	78.6418
Smp_150300	MAP kinase activating death domain	0.103	-0.538389	0.435389	4	-0.755976	0.109879	1.38117	0.00151582	0.625193	0.205074	9.05053	4.99424	12.3455
Smp_073140	hypothetical protein	0.081479	-0.516848	0.435369	4	-0.703889	0.0455618	1.45859	6.35301e-06	0.754699	0.0325463	588.849	332.889	869.812
Smp_016390	charged multivesicular body protein 2a	-0.111062	-0.324164	0.435227	9	-0.162766	0.55507	1.09848	7.51224e-08	0.935714	7.16085e-06	296.977	248.406	497.831
Smp_079230	immunophilin FK506 binding protein FKBP12, putative	-0.329086	-0.105774	0.43486	9	0.438736	0.471006	0.839719	0.108522	1.27845	0.0115807	515.011	657.208	1125.98
Smp_059610	hypothetical protein	-0.0665109	-0.367297	0.433808	9	-0.268502	0.801695	0.926152	0.257823	0.65765	0.470929	65.2942	50.655	92.3647
Smp_137530	TATA element modulatory factor	-0.159585	-0.273651	0.433236	9	-0.00208399	1	1.01753	0.0523599	1.01544	0.0595992	20.8725	19.5492	37.7954
Smp_073340	cyclin dependent kinase 5	-0.0292584	-0.403963	0.433221	4	-0.350344	0.614364	1.32995	0.0136115	0.979608	0.0869193	26.0947	18.7016	46.457
Smp_082780	wiskott Aldrich syndrome protein	-0.352825	-0.0802559	0.43308	9	0.506515	0.144921	0.761194	0.018179	1.26771	4.42922e-05	50.3797	67.7766	108.057
Smp_090870	protein sec13	-0.154332	-0.278542	0.432873	9	-0.044038	0.888235	1.08336	1.20667e-08	1.03932	7.1426e-08	93.2836	84.9325	168.374
Smp_177180	hypothetical protein	0.0371955	-0.469907	0.432711	4	-0.57687	0.293297	1.31681	0.00583855	0.739936	0.161085	159.011	98.4838	236.744
Smp_172650	rho guanine nucleotide exchange factor	0.1555	-0.587676	0.432175	4	-0.883983	0.300335	1.2962	0.0990985	0.412219	0.670341	7.34619	3.59681	8.79242
Smp_053100	rap guanine nucleotide exchange factor 6	-0.0776413	-0.354198	0.431839	9	-0.25425	0.763214	1.03539	0.103406	0.781136	0.254285	4.53598	3.59462	6.96645
Smp_210760	WD repeat containing protein 81	-0.215776	-0.215426	0.431201	9	0.100529	0.940347	0.68405	0.493573	0.784578	0.448246	1.89081	1.90273	2.97664
Smp_150460	heavy metal associated domain containing protein	-0.0101661	-0.420991	0.431157	4	-0.439823	0.590554	1.31437	0.0445588	0.874546	0.220623	76.3761	52.5348	127.196
Smp_026670	transmembrane protein 26	1.97723	-2.40812	0.430891	15	-5.48812	4.36997e-12	3.39248	4.48768e-05	-2.09564	0.0110222	77.4904	0.993076	13.8205
Smp_000310	transmembrane protein 41B	0.190347	-0.62072	0.430372	4	-1.01802	0.0217016	1.52407	0.000316569	0.50605	0.318189	265.585	120.398	331.913
Smp_164930	activated cdc42 kinase 1	-0.141333	-0.288992	0.430325	9	-0.0794077	0.924926	0.948015	0.0939725	0.868607	0.142778	58.0103	51.1602	95.8745
Smp_088620	hypothetical protein	-0.074893	-0.35516	0.430053	4	-0.249499	0.649813	1.13447	0.00625231	0.884973	0.0427388	174.849	136.083	285.234
Smp_075030	myotrophin	0.0949717	-0.524487	0.429516	4	-0.705183	0.235355	1.53132	0.00353754	0.826137	0.15486	85.0673	47.1376	135.563
Smp_042340	catenin delta 2	1.1574	-1.58673	0.429328	15	-3.03287	0.00584344	2.08575	0.0728545	-0.947115	0.482558	5.35762	0.373358	2.10838
Smp_001940	DREV protein	-0.12381	-0.305477	0.429287	9	-0.123169	0.775473	1.14443	9.76859e-05	1.02127	0.000675417	74.9777	64.3444	135.363
Smp_169900	serine:threonine protein kinase	0.278192	-0.707078	0.428886	4	-1.24791	0.010412	1.59012	0.000855389	0.342202	0.576345	29.1404	11.4126	32.6995
Smp_020370	reticulon 1	0.119818	-0.54824	0.428422	4	-0.824037	8.58232e-05	1.40088	4.02121e-12	0.576845	0.00924582	737.908	387.924	965.389
Smp_095880	hypothetical protein	-0.453392	0.0259435	0.427448	9	0.818406	0.166349	0.715311	0.220341	1.53372	0.00510111	2.97646	5.08553	8.00243
Smp_005280	ubiquitin carboxyl terminal hydrolase 10	-0.489138	0.0621523	0.426986	9	0.897786	0.00968964	0.488916	0.190475	1.3867	3.86033e-05	30.1969	53.4531	70.6859
Smp_175780	protein fem 1 C	0.0319471	-0.458642	0.426695	4	-0.542371	0.446442	1.11867	0.0672568	0.576295	0.414695	17.9504	11.6083	24.1575
Smp_181120	amyloid protein binding protein 2	-0.317262	-0.109344	0.426606	9	0.423274	0.479569	0.735025	0.158075	1.1583	0.0210484	55.7379	70.2932	111.634
Smp_085520	ATPase, H+ transporting, lysosomal 31 kDa, V1	0.335674	-0.762123	0.426449	4	-1.42795	5.7961e-10	1.71309	5.57053e-14	0.285136	0.321335	833.201	286.797	888.547
Smp_028030	slit robo rho gtpase activating protein 1	-0.218347	-0.208063	0.42641	9	0.162968	0.830283	0.885393	0.104648	1.04836	0.0557495	12.4751	13.2817	22.813
Smp_078750	tetraspanin 97e	0.212751	-0.638693	0.425942	4	-1.08327	0.000156559	1.53854	3.30462e-08	0.45527	0.166955	1021.76	446.889	1234.17
Smp_175640	hypothetical protein	-0.215522	-0.210145	0.425667	9	0.143895	0.915488	0.83464	0.40907	0.978534	0.34013	17.3068	18.6636	31.5873
Smp_164540	cation transporting ATPase 13A1	-0.0410403	-0.384171	0.425211	9	-0.296146	0.77506	1.15944	0.136574	0.863296	0.307762	17.7642	13.4931	28.821
Smp_007960	4 hydroxyphenylpyruvate dioxygenase	-0.355678	-0.0694424	0.42512	9	0.517119	0.220692	0.796545	0.0388672	1.31366	0.000427859	33.0801	45.3865	74.2317
Smp_146060	Ral GTPase activating protein subunit alpha 1	-0.124233	-0.300619	0.424853	9	-0.119534	0.873222	1.1166	0.0259561	0.997064	0.0555874	7.85889	6.90116	13.9804
Smp_027040	hypothetical protein	-0.254704	-0.170101	0.424805	9	0.257163	0.560034	0.889789	0.0104288	1.14695	0.000828431	154.421	171.53	302.321
Smp_176350	contactin	1.13431	-1.55788	0.423569	15	-3.58667	2.45911e-14	2.82789	6.74955e-09	-0.758783	0.142511	16.0398	1.16801	8.21601
Smp_134180	receptor type tyrosine protein phosphatase	1.35542	-1.77883	0.423407	15	-4.12821	1.4127e-12	2.95319	1.03694e-06	-1.17502	0.0654685	17.85	0.805625	6.61282
Smp_079760	integrin linked protein kinase	-0.0232781	-0.39972	0.422998	4	-0.403387	0.478063	1.12442	0.0179606	0.721029	0.157797	7.61272	5.38122	10.8649
Smp_199000	hypothetical protein	-0.0247814	-0.397824	0.422605	4	-0.3645	0.574962	1.32954	0.00903409	0.96504	0.073915	44.5302	32.3512	78.7194
Smp_091790	hypothetical protein	-0.0926302	-0.32982	0.42245	9	-0.180736	0.739359	1.09475	0.00485476	0.914012	0.0238866	137.477	112.635	228.394
Smp_197020	nucleolar protein c7c	0.270118	-0.692209	0.42209	4	-1.23908	0.00387347	1.5293	0.000279105	0.290214	0.600101	98.9318	38.7458	107.289
Smp_163650	C terminal pdz ligand of neuronal nitric oxide	1.39888	-1.82071	0.421825	15	-3.7554	7.96604e-05	2.71975	0.00650461	-1.03566	0.360274	9.8255	0.401226	3.81479
Smp_001420	growth hormone regulated TBC protein 1 A	-0.184521	-0.235938	0.420459	9	0.069436	0.925886	0.810957	0.107984	0.880393	0.0866932	43.8059	43.0229	71.4181
Smp_210440	4 trimethylaminobutyraldehyde dehydrogenase	-0.272839	-0.147326	0.420164	9	0.248431	0.79733	1.08901	0.125125	1.33744	0.0602871	5.58959	6.4409	13.4761
Smp_015440	hypothetical protein	-0.183638	-0.236051	0.419688	9	0.0394822	0.946024	1.04029	0.00359616	1.07978	0.00278516	41.8163	40.4009	79.3811
Smp_172400	phosphatidylinositol 4 phosphate 3 kinase C2	-0.36254	-0.0550592	0.417599	9	0.529332	0.631616	0.708976	0.470671	1.23831	0.187183	5.45359	7.89079	12.1196
Smp_900040	NADH dehydrogenase subunit 2	-0.263652	-0.153208	0.416861	9	0.274479	0.670088	0.914811	0.0679228	1.18929	0.0162977	442.759	502.806	903.51
Smp_162150	hypothetical protein	-0.17992	-0.236729	0.416649	9	0.0922047	0.948456	0.832347	0.413862	0.924552	0.376813	10.725	10.9494	18.6611
Smp_150200	lethal(2)neighbour of Tid protein	-0.750259	0.333834	0.416425	13	1.67358	1.70865e-05	0.102745	0.856021	1.77632	6.38562e-06	37.1431	113.783	114.394
Smp_194930	TBC1 domain family 0	0.0115469	-0.427963	0.416416	4	-0.490552	0.181622	1.11135	0.000646113	0.620799	0.082358	162.634	107.114	220.635
Smp_162920	zinc transporter ZIP domain containing protein	-0.365803	-0.0503929	0.416195	9	0.597127	0.131959	0.607181	0.117238	1.20431	0.000928338	46.0051	65.2791	94.2006
Smp_141790	membrane associated guanylate kinase, WW and PDZ	0.0469841	-0.462381	0.415397	4	-0.567208	0.569842	1.23731	0.138577	0.670102	0.48849	10.1983	6.49528	14.7097
Smp_062890	V type proton ATPase 16 kDa proteolipid	0.424146	-0.839479	0.415333	4	-1.6231	9.80045e-05	1.85658	6.92286e-06	0.233482	0.681608	720.962	210.928	739.764
Smp_067490	programmed cell death protein	-0.219567	-0.195677	0.415244	9	0.178187	0.638667	0.824157	0.0039818	1.00234	0.00042602	149.643	158.595	262.182
Smp_012350	venom allergen-like (VAL) 11 protein	0.385961	-0.801023	0.415062	4	-1.5844	3.38676e-10	1.76272	3.59892e-12	0.178322	0.602079	102.571	31.8298	102.066
Smp_005190	mitogen activated protein kinase kinase kinase	0.191402	-0.606071	0.414669	4	-1.00785	0.0150262	1.3989	0.000481873	0.391046	0.429576	64.1027	29.7199	74.2313
Smp_000640	hypothetical protein	-0.0366607	-0.377755	0.414416	4	-0.345613	0.556578	1.09429	0.0194255	0.748673	0.140726	168.343	122.375	251.426
Smp_008620	inactive rhomboid protein 1	-0.252891	-0.161483	0.414375	9	0.250325	0.634091	0.757875	0.0697607	1.0082	0.015054	17.0593	19.2416	29.9595
Smp_122910	Serine:threonine protein kinase mTOR	0.0238045	-0.437171	0.413367	4	-0.537279	0.306657	1.19973	0.00888702	0.662447	0.19373	5.24612	3.39281	7.41472
Smp_019980	vacuole membrane protein 1	-0.189003	-0.223356	0.412359	9	0.0576921	0.915023	0.903368	0.00980101	0.96106	0.00661235	113.801	111.12	197.363
Smp_003340	hypothetical protein	-0.0321952	-0.379788	0.411983	4	-0.358995	0.411821	1.08895	0.00251671	0.729957	0.0588547	45.1939	32.861	66.1181
Smp_044520	hypothetical protein	0.0526426	-0.463698	0.411056	4	-0.62792	0.0345796	1.31387	1.80456e-06	0.685955	0.0210484	159.171	96.1476	226.556
Smp_178720	oligomeric golgi complex subunit 5	-0.142997	-0.267247	0.410244	9	-0.0148432	0.992908	0.792655	0.271135	0.777811	0.301268	21.5514	20.1471	32.6084
Smp_196040	SHC transforming protein 3	0.307879	-0.718056	0.410177	4	-1.35004	8.62438e-12	1.63383	8.75584e-17	0.283792	0.238256	316.958	116.396	339.635
Smp_165470	epidermal growth factor receptor	-1.85424	1.44469	0.409555	10	4.09353	3.02e-06	-1.47282	0.116041	2.62071	0.00605219	0.198496	5.24779	1.51776
Smp_164210	synaptosomal associated protein 25	-0.204451	-0.204834	0.409285	9	0.11905	0.80537	0.815341	0.0155646	0.934391	0.00574853	135.246	137.33	228.431
Smp_147940	phosphatidate phosphatase lpin3	-0.259219	-0.149531	0.40875	9	0.229787	0.846427	0.942064	0.289218	1.17185	0.190442	6.54607	7.63516	13.8546
Smp_135710	forkhead box protein K1	-0.182968	-0.225001	0.407968	9	0.043195	0.961084	1.02591	0.0550654	1.06911	0.0503887	33.3172	32.4571	63.8505
Smp_210850	transcription factor 25	-0.0576056	-0.34991	0.407516	4	-0.29711	0.298235	1.09308	4.75066e-06	0.795969	0.00122503	63.5472	48.6305	96.9884
Smp_162500	drug efflux protein	1.42567	-1.83273	0.407059	15	-4.08645	4.57098e-08	2.86528	0.000373529	-1.22117	0.10753	16.7251	0.694502	6.0559
Smp_132000	zinc finger SWIM domain containing protein	0.0574923	-0.4645	0.407008	9	-0.497706	0.735555	1.26261	0.285701	0.764904	0.570817	2.77685	1.77748	4.46246
Smp_096720	Lissencephaly type 1 y	-0.045047	-0.361321	0.406368	4	-0.312882	0.438921	1.18711	0.000241414	0.874224	0.0100295	253.01	188.881	409.699
Smp_012400	protein tyrosine phosphatase mitochondrial	-0.297641	-0.108049	0.405689	9	0.378691	0.65816	0.936252	0.177922	1.31494	0.0552683	12.6152	15.7833	29.7593
Smp_006340	transmembrane protein 85	-0.085859	-0.319663	0.405522	9	-0.184486	0.702071	1.09541	0.0017253	0.910929	0.0120565	285.349	235.141	470.723
Smp_048520	dehydrodolichyl diphosphate synthase	-0.236337	-0.169148	0.405485	9	0.232646	0.460601	0.874775	0.000495534	1.10742	8.1216e-06	273.743	299.109	520.741
Smp_091820	bestrophin 3	-0.0950913	-0.309707	0.404798	9	-0.172114	0.815479	1.09918	0.0351823	0.927069	0.0896556	19.7725	16.422	34.0679
Smp_073400	lysosome associated membrane glycoprotein	0.148647	-0.553398	0.404751	4	-0.866415	0.00177673	1.32493	6.59252e-07	0.458512	0.138876	1279.72	653.69	1544.65
Smp_013630	cadherin	1.64534	-2.04906	0.403719	15	-4.4215	1.13584e-06	2.70205	0.00597627	-1.71946	0.0746028	10.6778	0.273031	2.44167
Smp_008310	succinate dehydrogenase complex, subunit C	0.0989348	-0.502197	0.403262	4	-0.708129	0.106006	1.35379	0.000687904	0.645664	0.152157	714.345	401.993	985.66
Smp_213020	hypothetical protein	-0.40792	0.00570155	0.402219	9	0.6766	0.395728	0.714464	0.344121	1.39106	0.0491169	8.72331	13.9767	21.3109
Smp_076950	solute carrier family 33	-0.28297	-0.119227	0.402197	9	0.387244	0.298627	0.735252	0.0255605	1.1225	0.000433667	61.9135	75.5535	118.568
Smp_207030	TBC1 domain family 5	-0.334092	-0.0676734	0.401765	9	0.488652	0.347841	0.616772	0.202342	1.10542	0.0160078	26.3902	35.4678	50.8025
Smp_183490	hypothetical protein	-0.149713	-0.251984	0.401696	9	0.00233266	1	0.915795	0.218584	0.918128	0.234726	26.2554	24.055	45.2286
Smp_130300	Na+:K+ ATPase alpha subunit	0.554958	-0.956238	0.40128	4	-1.96163	6.50952e-05	1.88082	0.000143006	-0.0808157	0.915	144.438	33.5538	119.069
Smp_086190	progestin and adipoQ receptor family member	0.161078	-0.56212	0.401042	4	-0.898341	0.0634639	1.35897	0.00298415	0.460624	0.404947	118.192	58.1716	144.491
Smp_140020	hypothetical protein	-0.192595	-0.208121	0.400716	9	0.127442	0.828103	0.910425	0.0248772	1.03787	0.0109055	27.0412	27.7665	49.8989
Smp_145700	ankyrin :unc	-0.098537	-0.302051	0.400588	9	-0.138297	0.870965	1.01417	0.0833587	0.875871	0.156632	26.9153	22.9015	43.7648
Smp_166030	erythrocyte membrane protein	0.808017	-1.20848	0.400461	2	-2.65814	4.3518e-06	2.17179	0.000235208	-0.486347	0.523841	106.956	14.8052	66.9337
Smp_017730	200-kDa GPI-anchored surface glycoprotein	0.201181	-0.601199	0.400019	4	-0.996338	0.066205	1.36281	0.00832853	0.366467	0.576004	89.143	41.066	102.208
Smp_192000	queuine tRNA ribosyltransferase	-0.0701717	-0.3298	0.399972	9	-0.243398	0.6495	1.12697	0.00553916	0.883575	0.0370923	15.9249	12.5923	26.5365
Smp_152130	calmodulin regulated spectrin associated protein	0.42243	-0.822118	0.399689	4	-1.51686	0.0489912	1.67046	0.0271007	0.153596	0.887463	19.521	5.93667	18.7796
Smp_021220	hypothetical protein	0.179045	-0.577361	0.398315	4	-0.921245	0.00183768	1.38907	1.10228e-06	0.467823	0.159329	645.602	316.233	779.114
Smp_071980	polycomb group ring finger protein 3	-0.10165	-0.296609	0.39826	9	-0.141837	0.743774	0.994011	0.00125036	0.852174	0.00728537	115.072	96.8719	183.886
Smp_172330	myosin xviiia	-0.0613565	-0.336646	0.398003	9	-0.248337	0.826064	1.04393	0.214618	0.795592	0.384895	4.73652	3.74632	7.64432
Smp_130760	Mediator of DNA damage checkpoint protein 1	-0.821484	0.423603	0.397881	13	1.78307	0.0321996	-0.111071	0.927383	1.672	0.0515337	4.35284	16.0274	13.7927
Smp_171590	#N/A	0.169802	-0.56766	0.397858	4	-0.900188	0.180438	1.3314	0.0328974	0.43121	0.577155	43.412	21.0238	52.8182
Smp_152230	WD repeat containing protein 24	-0.207568	-0.190029	0.397597	9	0.143133	0.874104	0.798661	0.218523	0.941794	0.152005	6.92986	7.30173	12.1391
Smp_063120	inosine triphosphate pyrophosphatase	-0.561158	0.164006	0.397152	9	1.19206	5.09234e-05	0.400732	0.229175	1.59279	5.84377e-08	79.4312	171.244	212.898
Smp_139800	rho associated protein kinase 1	-0.186301	-0.209787	0.396088	9	0.0551004	0.952397	0.951953	0.116121	1.00705	0.10437	35.1972	34.785	65.1501
Smp_197450	phosphatidylinositol transfer protein	-0.172669	-0.223324	0.395993	9	0.0778413	0.950969	0.86519	0.326446	0.943032	0.298436	5.7941	5.88882	10.2716
Smp_035080	hypothetical protein	-0.396066	0.00030335	0.395763	9	0.681142	0.151833	0.496211	0.308345	1.17735	0.00811232	88.617	133.223	179.697
Smp_130610	tRNA (guanine N(7)) methyltransferase	-0.0157788	-0.379741	0.39552	9	-0.379782	0.672533	0.888989	0.231951	0.509207	0.550402	15.9674	11.5582	20.2828
Smp_142320	hypothetical protein	-0.470723	0.0752431	0.39548	9	0.876361	0.0645575	0.515852	0.30654	1.39221	0.00205003	11.3101	20.0878	26.6199
Smp_176370	TBC1 domain family 3	0.0204145	-0.415411	0.394997	4	-0.481321	0.149678	1.21423	3.67498e-05	0.732904	0.0204343	75.8507	50.9408	111.201
Smp_074000	hypothetical protein	0.630287	-1.02475	0.394466	4	-2.20626	5.05614e-10	2.03364	1.10336e-08	-0.172622	0.737293	1548.89	304.309	1197.15
Smp_162040	Transmembrane 9 superfamily protein	-0.0164509	-0.377787	0.394238	4	-0.378566	0.164889	1.12102	2.01375e-06	0.742453	0.00283385	373.646	268.635	548.045
Smp_059880	galactose 1 phosphate uridylyltransferase	-0.0177863	-0.376263	0.394049	4	-0.403241	0.56882	1.17378	0.0412486	0.770541	0.216656	9.08752	6.35919	14.1567
Smp_029670	hypothetical protein	-0.697336	0.30334	0.393996	10	1.48838	0.00934971	0.0740654	0.931354	1.56245	0.00746379	27.0032	74.2207	73.6017
Smp_174990	endo beta N acetylglucosaminidase	-0.000254308	-0.393205	0.393459	4	-0.436765	0.167354	1.05183	0.000168071	0.615066	0.0424126	102.019	70.8292	137.498
Smp_038630	mitochondrial import inner membrane translocase	-0.157529	-0.235895	0.393424	9	0.0234173	0.980489	1.07379	0.0371967	1.09721	0.0370973	67.5653	64.0913	130.499
Smp_065130	gpi ethanolamine phosphate transferase 1	-0.346434	-0.0467561	0.39319	9	0.586346	0.0992251	0.689958	0.0433784	1.2763	8.75513e-05	26.5199	37.571	57.2752
Smp_145470	zinc finger protein	-5.30713	4.91444	0.392689	6	9.45265	1.5599e-24	-6.03739	3.5165e-15	3.41525	0.00121052	0	207.967	1.8976
Smp_155460	protein 4	-0.310594	-0.0820165	0.39261	9	0.486445	0.532771	0.708876	0.302655	1.19532	0.0705284	5.84197	7.95387	12.3316
Smp_019490	RER1 protein	-0.00524741	-0.386416	0.391663	4	-0.394487	0.392179	1.17098	0.00221307	0.776493	0.0587253	303.802	213.011	457.331
Smp_147820	hypothetical protein	0.18654	-0.578014	0.391474	4	-0.886651	0.158412	1.40061	0.0173916	0.51396	0.463307	23.3349	11.4864	29.7181
Smp_128370	glutamate synthase	1.45046	-1.84192	0.391461	15	-4.12224	2.451e-07	2.6202	0.00199086	-1.50203	0.0888917	94.9923	3.61582	26.6138
Smp_039300	E3 ubiquitin protein ligase TRIM56	1.48733	-1.87759	0.390264	15	-4.5879	3.58812e-23	3.16052	5.772e-11	-1.42738	0.00165631	44.5668	1.55128	14.3359
Smp_030370	calreticulin	0.0380895	-0.427913	0.389823	4	-0.544486	0.184995	1.18055	0.00120633	0.636066	0.116206	2830.18	1802.93	3908.84
Smp_151430	protein piccolo	0.844004	-1.23375	0.389746	2	-2.59747	0.00267285	2.40877	0.00636778	-0.188701	0.880221	14.5288	1.81059	11.504
Smp_066340	proteasome inhibitor PI31 subunit	-0.413259	0.0235466	0.389712	9	0.739437	0.165513	0.597888	0.265465	1.33732	0.00674239	62.0481	98.7355	142.248
Smp_043390	beta D xylosidase 2	0.165345	-0.554758	0.389413	4	-0.868159	0.0939173	1.28694	0.00856899	0.418778	0.485971	23.3887	11.8515	27.7393
Smp_126050	protocadherin fat 4	1.35816	-1.74713	0.388973	15	-3.77673	1.5073e-05	2.46813	0.00747904	-1.3086	0.192855	13.6118	0.639754	4.30666
Smp_198330	zinc finger protein 291	-0.241248	-0.147559	0.388807	9	0.236275	0.788365	0.961908	0.141976	1.19818	0.066699	7.98095	8.99793	16.8155
Smp_054220	vacuolar ATP synthase subunit G	0.374029	-0.762365	0.388336	4	-1.47967	1.15606e-09	1.69332	2.6443e-12	0.213659	0.508857	764.056	255.503	774.213
Smp_162000	E3 ubiquitin protein ligase UBR4	-0.0422811	-0.346001	0.388282	9	-0.303398	0.763214	1.25727	0.0942215	0.953872	0.239631	7.09456	5.47417	12.4922
Smp_214110	#N/A	-0.165478	-0.222286	0.387764	9	0.0766246	0.936416	0.968343	0.133221	1.04497	0.112748	19.111	18.6919	35.8981
Smp_044250	STAM binding protein	0.0943233	-0.482034	0.387711	4	-0.697779	0.000628525	1.22294	6.04402e-10	0.525157	0.0142502	106.911	61.6586	134.75
Smp_063490	ATP dependent Clp Protease ATP binding subunit	0.0307379	-0.418113	0.387375	4	-0.513584	0.296327	1.11911	0.00941409	0.60553	0.208154	45.9807	30.3274	61.4817
Smp_900050	NADH dehydrogenase subunit 5	-0.28057	-0.106361	0.386931	9	0.369523	0.528801	0.74965	0.128999	1.11917	0.019436	957.231	1160.81	1867.1
Smp_083990	cationic amino acid transporter	0.910408	-1.29701	0.386604	15	-3.00129	2.47552e-21	2.31646	7.18877e-13	-0.68483	0.0566827	170.632	19.2144	91.624
Smp_140170	irregular chiasm C roughest protein	2.7497	-3.13605	0.386349	15	-5.8734	2.94109e-08	2.84824	0.0152194	-3.02516	0.00430982	13.7383	0.0393822	0.998518
Smp_153290	cement protein 3B variant 3	0.232875	-0.61913	0.386254	4	-1.09911	0.0126602	1.48761	0.00059965	0.388496	0.465602	25.784	11.1173	29.9759
Smp_136220	hypothetical protein	-0.456598	0.0703678	0.386231	9	0.889229	0.102334	0.44258	0.454502	1.33181	0.0114783	73.5363	130.907	169.289
Smp_153580	hypothetical protein	1.99628	-2.38245	0.386175	15	-4.99763	1.51976e-07	3.14926	0.00210237	-1.84837	0.0572954	57.3133	0.780247	12.173
Smp_133420	serine:threonine protein kinase	0.111829	-0.497928	0.386099	4	-0.679048	0.542329	1.08613	0.264065	0.407087	0.730953	8.37343	4.63034	10.2107
Smp_148000	hypothetical protein	-0.0204464	-0.365555	0.386002	4	-0.362923	0.484601	1.00015	0.0193039	0.637229	0.173845	58.208	42.2746	79.6934
Smp_128790	Non-specific protein-tyrosine kinase	0.144198	-0.529596	0.385398	9	-0.73506	0.566363	1.17138	0.296481	0.436321	0.750659	7.51697	4.03384	9.19243
Smp_059130	CAP Gly domain containing linker protein 2	-0.121687	-0.263466	0.385153	9	-0.0568044	0.943001	1.04363	0.0400472	0.986828	0.0604574	22.7146	20.576	40.7337
Smp_900100	NADH dehydrogenase subunit 3	0.0157169	-0.400322	0.384605	4	-0.435788	0.503139	1.2062	0.0229047	0.77041	0.18572	438.047	299.231	657.161
Smp_166920	PDZ and LIM domain protein Zasp	2.18179	-2.56637	0.384581	15	-5.81423	1.67656e-11	3.57226	9.27241e-05	-2.24197	0.00894867	72.674	0.616155	12.0812
Smp_090690	hypothetical protein	-0.291588	-0.0924012	0.383989	9	0.392248	0.142298	0.693694	0.00451789	1.08594	4.47259e-06	147.797	183.541	278.08
Smp_009990	Receptor protein-tyrosine kinase	0.180252	-0.564214	0.383962	4	-0.862072	0.224157	1.37395	0.0343725	0.511879	0.517881	12.4084	6.30419	15.6412
Smp_165170	transient receptor potential cation channel	0.0244494	-0.40841	0.383961	9	-0.420642	0.715779	0.866024	0.370538	0.445382	0.689002	3.95847	2.69825	4.78521
Smp_164050	O phosphoseryl tRNA(Sec) selenium transferase	-0.429192	0.0454636	0.383729	9	0.82412	0.0138983	0.581518	0.0944986	1.40564	1.14793e-05	52.8321	87.5287	123.976
Smp_073720	Arp2:3 complex subunit ARPC5	-0.215732	-0.167947	0.383679	9	0.199212	0.619818	0.846008	0.00568317	1.04522	0.000564534	393.233	421.869	716.668
Smp_135940	hypothetical protein	-0.06492	-0.318756	0.383676	9	-0.194043	0.771644	1.00444	0.0382654	0.810399	0.114023	119.027	95.4445	184.403
Smp_119980	Translocation protein SEC62	-0.0352422	-0.347613	0.382855	4	-0.304969	0.168827	1.10959	4.76503e-09	0.804618	3.85796e-05	125.665	95.1607	193.615
Smp_177540	#N/A	-1.11464	0.731903	0.382737	13	2.67029	4.78167e-05	-0.493027	0.526668	2.17726	0.00196477	5.63313	39.146	25.527
Smp_162440	mechanosensory protein 2	2.48964	-2.87189	0.382246	15	-6.63463	3.82073e-17	3.97622	1.38723e-06	-2.65841	0.000559326	90.345	0.448729	10.98
Smp_163580	rab family	0.187756	-0.569796	0.38204	4	-0.946624	0.000290452	1.38451	4.69272e-08	0.437887	0.139146	752.695	362.994	892.149
Smp_123620	hypothetical protein	-0.0218639	-0.359893	0.381757	4	-0.342951	0.328224	1.03479	0.000441592	0.691838	0.0273658	202.423	148.957	286.851
Smp_144610	sugar phosphate exchanger 2	-0.25066	-0.131059	0.381719	9	0.291357	0.456725	0.696516	0.034742	0.987872	0.00229812	61.8078	70.5914	107.229
Smp_079270	LIM, zinc binding,domain containing protein	0.0441915	-0.425581	0.381389	9	-0.49782	0.459136	1.17775	0.0367297	0.679934	0.283318	846.03	558.144	1178.15
Smp_169250	tumor protein p63 regulated gene 1 protein	0.117845	-0.499127	0.381282	4	-0.745739	0.0317433	1.35197	3.65865e-05	0.606233	0.0945012	69.7355	38.435	94.733
Smp_045560	annexin	1.73949	-2.12077	0.381282	15	-5.36292	7.62489e-58	3.6215	2.30554e-26	-1.74141	1.66837e-07	600.555	13.0202	155.45
Smp_146620	potassium voltage gated channel protein	0.852688	-1.23341	0.380724	15	-2.53477	0.00330155	1.93754	0.0324314	-0.597228	0.584222	6.07588	0.821238	3.34981
Smp_010140	SRY (sex determining region Y) box 7	-0.310646	-0.069955	0.380601	9	0.489262	0.0939628	0.644863	0.0201743	1.13413	1.96461e-05	129.446	169.802	250.458
Smp_157700	protein disulfide isomerase	0.280513	-0.660838	0.380325	4	-1.14851	0.0744563	1.54717	0.013024	0.398662	0.606814	7.69714	3.15003	9.12681
Smp_040770	methionyl tRNA synthetase, cytoplasmic	-0.441578	0.0616338	0.379944	9	0.837264	0.000739046	0.406291	0.133333	1.24356	3.77881e-07	42.2406	70.9441	88.2681
Smp_064150	mitochondrial carnitine:acylcarnitine carrier	-0.297418	-0.0824631	0.379881	9	0.419207	0.433531	0.678726	0.15178	1.09793	0.0157692	162.992	205.935	312.999
Smp_139400	tensin 1	1.46476	-1.84464	0.379879	15	-4.19916	5.81282e-09	2.91549	0.000126345	-1.28368	0.0988229	7.36278	0.281071	2.50806
Smp_900060	Cytochrome c oxidase subunit III	-0.132096	-0.246584	0.37868	9	-0.020679	0.983435	0.974615	0.0638601	0.953936	0.0787816	1278.18	1166.08	2202.16
Smp_052710	mitochondrial ribosomal protein l48	-0.383981	0.00632781	0.377654	9	0.68438	0.0173925	0.567636	0.052304	1.25202	5.04952e-06	138.12	209.163	291.589
Smp_063480	ATP dependent Clp Protease ATP binding subunit	-0.151138	-0.226363	0.377501	9	0.00280797	1	0.8715	0.0305448	0.874308	0.0337554	30.5023	28.6023	49.8598
Smp_900080	NADH dehydrogenase subunit 4L	-0.118408	-0.258597	0.377005	9	-0.110188	0.923102	1.0602	0.18022	0.950008	0.254472	51.3001	46.0458	91.8284
Smp_198650	ankyrin :unc	-0.194811	-0.181303	0.376114	9	0.142871	0.916892	0.860245	0.396579	1.00312	0.330785	13.6009	14.7372	25.8326
Smp_147760	hypothetical protein	0.645455	-1.02079	0.375336	4	-2.11955	0.00237017	1.83888	0.0102762	-0.280666	0.771567	7.61772	1.50401	5.40497
Smp_034530	iron sulfur cluster assembly 2	-0.0974012	-0.27776	0.375161	9	-0.110052	0.874579	1.02559	0.0288458	0.915537	0.0604211	103.369	89.9983	173.075
Smp_172220	tetratricopeptide repeat protein 35 B	-0.0577186	-0.317416	0.375135	9	-0.265504	0.538723	0.946312	0.00538923	0.680808	0.0599936	132.192	103.882	187.539
Smp_077670	tRNA guanosine 2' O methyltransferase TRM11	-0.511015	0.135963	0.375052	9	1.04067	0.00585961	0.462141	0.265465	1.50281	5.46641e-05	18.0571	35.35	46.3837
Smp_073280	hypothetical protein	1.47213	-1.84697	0.374833	15	-4.43399	1.74354e-16	2.91646	1.4306e-07	-1.51753	0.00960054	395.211	14.9042	115.127
Smp_135400	#N/A	-0.0529261	-0.321732	0.374658	9	-0.247073	0.760236	1.02774	0.089305	0.780666	0.231568	10.6724	8.54672	16.6612
Smp_213810	centromere:kinetochore protein zw10	-0.75398	0.379379	0.374601	13	1.75099	3.85484e-05	-0.0435365	0.950499	1.70746	8.49637e-05	11.7336	38.3477	34.8061
Smp_172110	protein disulfide isomerase A6	-0.135962	-0.237521	0.373483	9	-0.00918462	0.991352	0.916536	0.00926887	0.907351	0.0115578	470.508	436.969	779.571
Smp_057630	Activating signal cointegrator 1 complex subunit	-0.206967	-0.165335	0.372302	9	0.189482	0.471526	0.791842	0.000142533	0.981323	2.21603e-06	172.839	184.905	301.381
Smp_008220	palmitoyltransferase ZDHHC11	-0.501857	0.131211	0.370646	9	1.03709	1.83333e-05	0.405	0.132807	1.44209	1.78285e-09	97.6943	189.729	235.512
Smp_162630	ubiquitin activating enzyme E1	-0.0350047	-0.335019	0.370024	9	-0.280746	0.497684	1.06087	0.00114768	0.780121	0.023549	160.031	123.859	240.865
Smp_165930	flightless I	0.202076	-0.57169	0.369614	4	-0.968739	0.0420684	1.57287	0.000461737	0.604132	0.246901	22.5582	10.7972	30.6305
Smp_130280	neurogenic locus notch protein	0.646535	-1.01443	0.3679	4	-2.11359	0.00484817	1.87744	0.0151504	-0.236145	0.822587	2.70212	0.510784	2.01454
Smp_080520	transcriptional activator	-0.36916	0.00131608	0.367844	9	0.677436	0.0875661	0.682052	0.0800998	1.35949	0.000209643	12.2418	18.5062	28.2135
Smp_027340	INSIG protein	-0.112755	-0.255063	0.367818	9	-0.0700237	0.922074	0.869937	0.0692525	0.799914	0.10928	115.692	102.847	178.717
Smp_019350	hypothetical protein	1.33761	-1.70536	0.367741	15	-3.99361	1.04785e-10	2.82442	9.19137e-06	-1.16919	0.0989373	568.738	28.9986	207.992
Smp_167010	talin 2	0.152981	-0.520267	0.367286	9	-0.77021	0.386096	1.08786	0.18106	0.317648	0.757199	4.85041	2.61351	5.31064
Smp_046290	CKLF MARVEL transmembrane domain containing protein	0.126769	-0.493851	0.367083	4	-0.739699	0.0580204	1.19304	0.00110285	0.453341	0.29204	874.441	482.709	1053.09
Smp_142210	vacuolar protein sorting associated protein 18	0.140793	-0.507561	0.366768	4	-0.717206	0.336195	1.25822	0.0580855	0.541016	0.49654	16.3145	9.00554	21.0507
Smp_208080	beta ketothiolase	0.339124	-0.70534	0.366216	4	-1.28368	0.0368762	1.64322	0.0063023	0.359542	0.637	47.2237	17.3718	53.6452
Smp_069960	ubiquitin carboxyl terminal hydrolase 5	-0.159295	-0.205805	0.3651	9	0.0629855	0.946538	0.662241	0.308784	0.725227	0.278457	66.5894	65.7884	98.9547
Smp_189990	hypothetical protein	0.161334	-0.526379	0.365045	4	-0.799065	0.391717	1.15432	0.177989	0.355259	0.73795	40.298	20.9217	47.3903
Smp_008580	UDP N acetylglucosamine transporter	-0.201491	-0.163541	0.365033	9	0.187869	0.700036	0.83119	0.0228602	1.01906	0.00502423	127.606	136.032	228.871
Smp_154400	syntaxin binding protein 5	0.00623697	-0.371137	0.3649	9	-0.345541	0.693077	1.1523	0.0900661	0.80676	0.278408	73.0657	53.7619	112.362
Smp_002410	14-3-3 epsilon 2	-0.220175	-0.144649	0.364824	9	0.248357	0.415299	0.777019	0.00185099	1.02538	2.92529e-05	893.81	991.905	1600.86
Smp_138170	hypothetical protein	0.4077	-0.770786	0.363086	4	-1.4145	0.0600579	1.44269	0.0526503	0.0281821	0.984088	34.2875	11.3213	30.4285
Smp_131210	#N/A	1.54561	-1.90762	0.362014	15	-4.30812	1.26038e-07	2.94558	0.000593344	-1.36254	0.13329	25.1446	0.833774	8.05613
Smp_123280	major facilitator superfamily domain containing protein	-0.0728978	-0.289075	0.361973	9	-0.16941	0.69175	0.897093	0.00435881	0.727683	0.0268181	100.971	83.5785	147.127
Smp_102810	queuine tRNA ribosyltransferase subunit QTRTD1	-0.525651	0.164647	0.361004	9	1.09907	0.0180862	0.229984	0.688949	1.32905	0.0041348	39.3052	80.1923	88.9898
Smp_073950	Zinc finger HIT domain containing protein 3	-0.25607	-0.104592	0.360663	9	0.351151	0.208863	0.75278	0.00235281	1.10393	5.11481e-06	75.8476	90.9771	144.249
Smp_168470	#N/A	-0.197214	-0.163176	0.360391	9	0.178793	0.86145	0.701511	0.364165	0.880304	0.255879	38.9858	41.8293	65.8397
Smp_900010	cytochrome c oxidase subunit II	-0.167177	-0.193129	0.360305	9	0.10865	0.880501	0.852939	0.0867142	0.96159	0.0557881	763.581	766.45	1320.87
Smp_034190	eukaryotic initiation factor 4A III	-0.166666	-0.193145	0.359811	9	0.0953681	0.88476	0.955411	0.0288969	1.05078	0.0173302	48.6474	48.9541	89.8247
Smp_049140	hypothetical protein	-0.0247647	-0.334246	0.35901	4	-0.29859	0.561483	1.09786	0.00645137	0.799265	0.0622162	87.5259	65.7312	134.961
Smp_176200	superoxide dismutase [Cu-Zn]	-0.122171	-0.23642	0.358591	9	-0.00652624	0.996408	0.911375	0.0251256	0.904849	0.0296977	652.966	605.224	1073.4
Smp_066960	geranylgeranyl transferase type I beta subunit	-0.150536	-0.208039	0.358575	9	0.059636	0.918294	0.83245	0.0292929	0.892086	0.0212085	261.444	254.649	427.552
Smp_213820	cornichon, putative	-0.29352	-0.064932	0.358452	9	0.467426	0.333114	0.649312	0.142822	1.11674	0.00829112	147.24	190.539	283.366
Smp_160770	arp2:3 complex 20 kDa subunit	0.0450662	-0.4033	0.358234	4	-0.482819	0.333433	1.17414	0.0060936	0.691323	0.142929	270.329	177.612	385.385
Smp_010370	Receptor expression enhancing protein 6	-1.22422	0.866189	0.358028	13	3.07592	3.41972e-09	-0.749892	0.2039	2.32603	1.98584e-05	15.5102	132.523	72.1769
Smp_055780	smdr2	2.01046	-2.36827	0.357802	15	-4.5537	3.24091e-05	2.50191	0.0362599	-2.05178	0.0845899	8.14067	0.107585	1.28571
Smp_010260	DNA repair protein complementing XP A cells	0.114294	-0.472032	0.357737	4	-0.745835	0.312029	1.27033	0.0582668	0.524497	0.508661	11.3519	6.25161	15.1336
Smp_027220	lethal, Chr 7, Rinchik 6	-0.641501	0.284174	0.357328	13	1.45472	3.0345e-05	0.166298	0.719843	1.62101	3.85274e-06	162.254	419.082	445.742
Smp_019730	hypothetical protein	0.0397962	-0.39687	0.357074	4	-0.473546	0.352909	1.12029	0.0102054	0.646741	0.182192	1147.73	762.057	1581.56
Smp_059820	hypothetical protein	1.49469	-1.85071	0.356018	15	-4.55637	4.57169e-27	3.28038	6.59486e-14	-1.276	0.0021797	139.096	5.02116	50.2296
Smp_210740	Actin protein 3	0.401765	-0.756961	0.355196	4	-1.50572	8.24364e-08	1.66056	3.01288e-09	0.154843	0.694152	171.552	55.583	167.135
Smp_036550	hypothetical protein	-0.267977	-0.086102	0.354079	9	0.402095	0.453039	0.739665	0.111738	1.14176	0.0111184	152.147	187.673	299.576
Smp_150920	synaptotagmin	1.23068	-1.58473	0.354043	15	-3.77299	1.56501e-10	2.68831	1.16864e-05	-1.08468	0.100722	66.3128	4.09118	27.0615
Smp_039980	28S ribosomal protein S33, mitochondrial	-0.174129	-0.179838	0.353967	9	0.137807	0.822098	0.85557	0.0477183	0.993377	0.0223034	174.481	180.083	307.905
Smp_137450	hypothetical protein	-0.240561	-0.112741	0.353302	9	0.32211	0.579731	0.7396	0.124707	1.06171	0.0240258	55.0664	65.1299	102.928
Smp_159100	lethal(3)malignant brain tumor protein 4	-0.366194	0.0132674	0.352926	9	0.633205	0.486761	0.398172	0.663417	1.03138	0.215117	21.5098	33.2451	39.5438
Smp_053700	ubiquinol cytochrome c reductase, complex III	-0.0370225	-0.315899	0.352921	9	-0.263582	0.658559	0.962503	0.0372182	0.698921	0.16137	417.671	325.256	601.017
Smp_159570	neurexin 4	0.979256	-1.33194	0.352679	15	-2.80096	0.00109467	2.02712	0.0262522	-0.773836	0.461074	4.43873	0.477625	2.08617
Smp_165840	ribosome releasing factor 2, mitochondrial	-0.322997	-0.0289443	0.351941	9	0.428497	0.773969	1.02029	0.398141	1.44879	0.222106	2.68181	3.74369	7.68908
Smp_076990	protein tssc1	-0.0998633	-0.251982	0.351845	9	-0.0674392	0.891635	0.767404	0.0181398	0.699964	0.0370973	46.9674	41.7162	66.8136
Smp_148400	calmodulin binding transcription activator 2	0.467115	-0.818802	0.351688	4	-1.60371	0.022097	1.61026	0.0220986	0.0065504	0.99933	6.82969	1.97657	6.0138
Smp_052500	coiled coil domain containing protein 86	-0.49246	0.14182	0.35064	9	1.02241	0.0122778	0.310052	0.519227	1.33246	0.00104211	75.7459	147.84	171.279
Smp_137160	calcium binding mitochondrial carrier protein	-0.740869	0.39038	0.350488	13	1.73832	1.42279e-06	-0.0396599	0.946651	1.69866	4.33341e-06	15.0157	48.7137	43.7929
Smp_136510	rab3 GTPase activating protein catalytic	-0.305548	-0.0445726	0.350121	9	0.536046	0.346889	0.550287	0.313496	1.08633	0.0330156	36.8062	50.1577	69.5485
Smp_069880	u2 small nuclear ribonucleoprotein B''	-0.0539961	-0.295947	0.349943	9	-0.198498	0.807522	1.02664	0.0834028	0.828138	0.188829	22.061	17.7393	35.3492
Smp_000520	hypothetical protein	-0.0952348	-0.254697	0.349932	9	-0.0510205	0.956469	0.854803	0.16237	0.803782	0.209219	27.7737	25.4023	43.3866
Smp_165780	glycine cleavage system H protein	-0.318368	-0.0314208	0.349789	9	0.548797	0.162922	0.620964	0.0999212	1.16976	0.00101905	491.074	678.535	977.783
Smp_000200	NEDD4 binding protein 2 2	-0.0167305	-0.332113	0.348843	9	-0.337917	0.657648	0.950177	0.123554	0.61226	0.370275	14.3186	10.6156	19.4831
Smp_039400	eukaryotic translation initiation factor 5A	-0.456725	0.108014	0.348711	9	0.931297	0.0332194	0.406744	0.407406	1.33804	0.00154611	855.392	1541.79	1933.23
Smp_100370	F actin capping protein subunit beta	-0.131339	-0.217256	0.348595	9	0.0134135	0.986673	0.781797	0.0489154	0.79521	0.0506791	312.167	293.9	477.728
Smp_080100	synaptophysin	0.0368107	-0.384978	0.348167	4	-0.460647	0.316982	1.05774	0.00776975	0.597088	0.177566	540.255	363.477	718.472
Smp_006720	Synaptobrevin,domain containing protein	0.276903	-0.624649	0.347746	4	-1.11637	0.0166698	1.43707	0.00157341	0.320705	0.583077	259.971	108.836	284.212
Smp_162380	isoamyl acetate hydrolyzing esterase 1	-0.108866	-0.238486	0.347352	9	-0.0468957	0.949021	0.891614	0.057613	0.844718	0.0826215	105.769	95.2209	169.254
Smp_176480	myotubularin protein	0.272094	-0.618634	0.346539	12	-0.909762	0.469075	1.00624	0.393964	0.0964731	0.951868	11.6947	5.2379	10.7999
Smp_031430	hypothetical protein	0.97703	-1.32352	0.346493	15	-2.98221	2.78727e-07	2.37619	0.000113886	-0.606018	0.368656	50.2062	5.27819	29.2699
Smp_162510	drug efflux protein	-0.11069	-0.235433	0.346123	9	-0.0305188	0.947285	0.845135	0.00303192	0.814617	0.00505239	32.7319	30.2916	50.6939
Smp_143430	alpha mannosidase 2x	-0.0259959	-0.31995	0.345946	9	-0.234548	0.778614	0.890872	0.158075	0.656324	0.340921	24.9579	19.8082	34.7778
Smp_146310	three prime repair exonuclease 1	0.101889	-0.447759	0.34587	4	-0.643782	0.0749984	1.15824	0.000559942	0.514457	0.178057	145.108	86.4578	182.219
Smp_055130	pleckstrin y domain containing family F	0.0970332	-0.44244	0.345407	4	-0.621382	0.0324497	1.19297	1.14263e-05	0.57159	0.055766	105.879	64.1154	138.64
Smp_050730	elongator complex protein 2	-0.818366	0.473049	0.345317	9	1.80229	0.0104476	0.257692	0.778277	2.05998	0.00358355	3.3317	12.1062	13.7909
Smp_023840	hypothetical protein	-0.013083	-0.331776	0.344859	9	-0.308158	0.566346	1.00023	0.0193292	0.692069	0.134472	251.422	188.327	357.92
Smp_150730	discoidin domain containing receptor 2	-0.0199386	-0.32482	0.344758	9	-0.289457	0.810239	1.16004	0.199055	0.870581	0.37686	4.53498	3.49307	7.68405
Smp_135540	leishmanolysin 2 (M08 family)	0.373736	-0.717581	0.343845	4	-1.40499	0.00103261	1.45072	0.000767719	0.0457307	0.94704	65.5962	22.9027	58.9576
Smp_079000	Charged multivesicular body protein 1b 2	0.217079	-0.560734	0.343655	4	-0.968195	0.0346371	1.25456	0.00486967	0.28636	0.616524	130.047	61.5432	139.696
Smp_094340	hypothetical protein	0.110148	-0.453677	0.343529	4	-0.670908	0.00134816	1.19267	2.29401e-09	0.521765	0.0174975	234.688	137.779	295.297
Smp_170940	hypothetical protein	-0.257508	-0.0857398	0.343248	9	0.250275	0.845025	0.623028	0.547114	0.873303	0.398177	34.0861	39.5186	60.3174
Smp_147470	SLIT and NTRK protein 5 like	-0.0123547	-0.330286	0.34264	9	-0.271252	0.70191	0.903003	0.105106	0.63175	0.298046	12.5716	9.67941	17.1745
Smp_024110	enolase	0.252455	-0.594375	0.34192	4	-1.0744	0.00389446	1.49895	3.11778e-05	0.424544	0.333561	269.513	118.927	317.282
Smp_155590	vesicle transport protein USE1	-0.0864617	-0.25522	0.341682	9	-0.09378	0.821565	0.918832	0.00110083	0.825052	0.00418216	48.2235	42.1583	75.9664
Smp_056970	glyceraldehyde 3 phosphate dehydrogenase	0.295113	-0.636559	0.341446	4	-1.18139	0.0108978	1.42732	0.00164041	0.245928	0.685931	7166.73	2881.7	7487.28
Smp_203140	Minor histocompatibility antigen H13	0.0173305	-0.358732	0.341401	4	-0.397365	0.19372	1.05086	7.69827e-05	0.653495	0.0221512	1075.98	757.396	1489.09
Smp_064240	AP 1 complex subunit mu 1	0.00649954	-0.347843	0.341344	4	-0.354926	0.339156	1.00809	0.00127217	0.653166	0.052392	190.691	138.2	263.757
Smp_032230	mitochondrial fission 1 protein	0.0607951	-0.40187	0.341075	4	-0.52496	0.259661	1.12135	0.00621103	0.596391	0.194194	345.423	224.407	459.81
Smp_180470	Dynein intermediate chain	0.225683	-0.56621	0.340527	4	-1.00667	2.4622e-05	1.3071	3.85955e-08	0.300431	0.295349	62.4891	28.8254	67.664
Smp_161260	hypothetical protein	-0.171777	-0.168378	0.340155	9	0.165552	0.876608	0.567839	0.493853	0.733391	0.381319	26.0838	27.8158	39.4954
Smp_165570	ras dva small gtpase	0.996292	-1.33643	0.340141	15	-2.97634	1.72407e-05	2.15925	0.00361988	-0.817091	0.308791	21.6589	2.26216	10.3304
Smp_034400	adaptor protein complex	0.286764	-0.626902	0.340139	4	-1.15883	0.000353573	1.42016	9.27502e-06	0.261327	0.532533	398.293	165.694	417.274
Smp_082810	Cdc42	0.00556332	-0.345589	0.340026	4	-0.363934	0.429269	0.958942	0.0123804	0.595008	0.158372	638.729	458.742	852.436
Smp_205910	hypothetical protein	-0.451472	0.11196	0.339512	9	0.842419	0.442631	0.501308	0.654535	1.34373	0.185278	3.91679	7.4898	9.82561
Smp_175460	hydrocephalus inducing	-0.0980914	-0.241196	0.339287	9	-0.0311828	0.970278	0.793329	0.110119	0.762146	0.139935	6.18728	5.65865	9.26855
Smp_199630	hypothetical protein	-0.729365	0.39054	0.338825	10	1.585	0.0237315	-0.222884	0.80982	1.36212	0.064586	5.63052	17.3748	13.4877
Smp_104000	hypothetical protein	-0.143487	-0.194762	0.338249	9	0.0718853	0.901459	0.753501	0.0497524	0.825386	0.0340436	210.455	208.141	327.838
Smp_211200	methyltransferase nsun5	-0.615782	0.277602	0.33818	9	1.30238	0.0215465	0.223557	0.757637	1.52594	0.00716121	18.2569	44.8165	48.9046
Smp_004550	hypothetical protein	-0.169755	-0.168381	0.338136	9	0.147687	0.819419	0.747688	0.111696	0.895375	0.0573733	254.445	263.094	419.249
Smp_168170	calcineurin phosphoesterase	-0.220921	-0.116255	0.337177	9	0.307223	0.30167	0.69612	0.00698814	1.00334	6.72078e-05	141.34	162.909	250.381
Smp_039000	ATP synthase delta chain	-0.176152	-0.16053	0.336682	9	0.155706	0.637441	0.808336	0.000995246	0.964042	7.68175e-05	400.553	416.567	689.304
Smp_030300	endoplasmin	0.0354744	-0.371837	0.336362	4	-0.462018	0.0535769	1.01013	3.5296e-06	0.548115	0.0206614	206.884	140.817	267.69
Smp_037910	Succinate dehydrogenase (ubiquinone) cytochrome	0.0663144	-0.402058	0.335744	4	-0.520622	0.345212	1.0434	0.0303526	0.522777	0.345169	661.328	423.765	841.123
Smp_136250	hypothetical protein	-0.0858386	-0.248779	0.334618	9	-0.0734229	0.940347	0.937282	0.157207	0.863859	0.214522	13.0657	11.7035	21.4215
Smp_043210	tetraspanin	0.0153084	-0.349834	0.334526	4	-0.378447	0.32001	0.94835	0.00365039	0.569903	0.110481	209.219	150.455	273.543
Smp_131570	ubiquitin carboxyl terminal hydrolase	0.0455599	-0.379953	0.334393	4	-0.487209	0.609176	0.980639	0.223313	0.49343	0.600101	2.84202	1.86167	3.58953
Smp_087750	hypothetical protein	0.317664	-0.651792	0.334127	4	-1.16653	0.161607	1.14772	0.167478	-0.0188057	0.99337	36.8289	14.5102	31.1479
Smp_004350	ubiquitin conjugating enzyme E2 L3	0.276122	-0.610202	0.33408	4	-1.11025	8.49286e-06	1.34118	5.80357e-08	0.230932	0.47421	625.133	268.07	639.737
Smp_042910	hypothetical protein	-0.224178	-0.10978	0.333958	9	0.29661	0.400711	0.592284	0.0536468	0.888895	0.00295023	52.492	60.4448	85.8849
Smp_072490	hypothetical protein	-0.341828	0.00857247	0.333256	9	0.653465	0.0631054	0.535903	0.133475	1.18937	0.000313841	75.0938	110.888	151.974
Smp_212880	proteasome catalytic subunit 3 (T01 family)	-0.335734	0.00263316	0.333101	9	0.615149	0.154845	0.525406	0.224459	1.14056	0.00418788	474.101	685.362	926.611
Smp_148650	autophagy protein 2	0.0194033	-0.352383	0.33298	4	-0.416053	0.503139	1.08729	0.0336553	0.671236	0.234726	4.1967	2.97919	6.02086
Smp_195080	actin depolymerizing factor protein	-0.537828	0.204902	0.332927	9	1.19025	0.0073022	0.247769	0.651714	1.43802	0.00110813	216.382	468.147	525.689
Smp_158640	28S ribosomal protein S17, mitochondrial	-0.0514256	-0.281043	0.332468	9	-0.183936	0.796703	0.955531	0.0631957	0.771595	0.159375	235.941	190.758	357.87
Smp_143660	midasin	-0.462738	0.131041	0.331696	9	0.912889	0.206719	0.3649	0.648851	1.27779	0.0666201	1.5364	2.83709	3.49485
Smp_167500	DNA (apurinic or apyrimidinic site) lyase	-0.150938	-0.180221	0.331159	9	0.0513444	0.951729	0.94555	0.0879004	0.996894	0.0781916	14.8456	14.6277	27.1022
Smp_033540	carbonyl reductase 1	-0.327727	-0.00337214	0.331099	9	0.591249	0.193626	0.569896	0.201295	1.16114	0.00512916	301.669	429.158	600.94
Smp_155990	guanine nucleotide exchange factor	1.38512	-1.71621	0.331097	15	-3.89922	1.80171e-06	2.49768	0.00410546	-1.40154	0.123943	12.9795	0.622887	3.90394
Smp_212820	zinc finger protein	-0.389742	0.0589983	0.330744	9	0.687075	0.450065	0.744004	0.3834	1.43108	0.0744764	2.64761	4.17245	6.99028
Smp_138500	ARF GTPase activating protein GIT2	0.223192	-0.553844	0.330652	4	-0.91141	0.0600579	1.18936	0.0112623	0.277946	0.643508	12.5357	6.09325	13.1964
Smp_198740	#N/A	0.16448	-0.494504	0.330024	4	-0.77146	0.329435	1.08998	0.135974	0.318518	0.728217	3.94784	2.14547	4.33518
Smp_014780	alpha actinin, sarcomeric	-0.957589	0.627789	0.3298	13	2.34233	3.30319e-06	-0.50634	0.407986	1.83599	0.000450718	29.6601	151.674	97.506
Smp_125820	hypothetical protein	-0.39975	0.0699743	0.329776	9	0.756664	0.223003	0.418241	0.5271	1.17491	0.0441315	55.9514	92.2278	115.727
Smp_050250	hypothetical protein	-0.38358	0.0539153	0.329665	9	0.726764	0.0757956	0.313301	0.49382	1.04007	0.00852783	111.256	175.362	204.86
Smp_212000	signal recognition particle 72 kDa subunit	-0.0842467	-0.245307	0.329554	9	-0.117381	0.736681	0.867279	0.000420571	0.749897	0.00302366	130.435	113.194	194.718
Smp_144970	copper transporting ATPase 1	-0.0542159	-0.274788	0.329004	9	-0.205574	0.747618	0.83296	0.0860126	0.627386	0.230282	7.76585	6.3395	10.67
Smp_049600	DnaJ (Hsp40) subfamily C member	-0.110335	-0.217737	0.328071	9	-0.0347203	0.932839	0.782437	0.00243028	0.747716	0.00453742	170.328	154.574	252.776
Smp_066830	protein N terminal asparagine amidohydrolase	-0.497679	0.170076	0.327603	9	1.0583	0.250717	0.415378	0.681704	1.47368	0.0969621	4.7574	10.0599	13.0141
Smp_091750	hypothetical protein	0.276223	-0.603693	0.32747	4	-1.10994	0.00495868	1.21679	0.0020122	0.106854	0.851679	208.166	88.106	195.948
Smp_105700	U5 small nuclear ribonucleoprotein 200 kDa	-0.282857	-0.0445876	0.327445	9	0.431619	0.566351	0.66181	0.31667	1.09343	0.0843537	18.3359	23.9715	35.591
Smp_026270	early growth response protein 1	0.0692923	-0.396598	0.327305	4	-0.553286	0.18881	0.937443	0.0151993	0.384158	0.400921	43.5068	27.7876	50.1489
Smp_021040	protein FAM32A	-0.100176	-0.22649	0.326666	9	-0.0450068	0.906344	0.789998	0.00112005	0.744991	0.00257798	448.325	407.677	659.214
Smp_038210	WW domain binding protein 2	0.24507	-0.571284	0.326214	4	-1.01995	0.010412	1.25194	0.00131637	0.231988	0.653345	285.514	129.092	294.208
Smp_035730	FGF receptor activating protein	-0.0209264	-0.302844	0.32377	9	-0.263344	0.667264	0.851126	0.0766324	0.587782	0.263339	106.421	82.1815	141.218
Smp_031860	coatomer subunit delta	0.0519532	-0.375655	0.323702	4	-0.471976	0.0452206	1.05558	1.06926e-06	0.583602	0.0120237	191.903	128.549	253.659
Smp_100080	Tetraspanin,IPR000301 CD9:CD37:CD63	0.715416	-1.03901	0.323597	4	-2.32832	5.30852e-08	1.90328	1.71804e-05	-0.425044	0.433565	99.8628	17.812	64.4473
Smp_041730	Pre mRNA splicing factor cwc 21	-0.234325	-0.0888695	0.323195	9	0.284899	0.644735	0.722549	0.148889	1.00745	0.0404044	109.765	128.719	200.222
Smp_067000	hypothetical protein	-0.220662	-0.101886	0.322548	9	0.276323	0.613	0.515478	0.267327	0.7918	0.0785664	106.258	120.994	164.937
Smp_164670	hypothetical protein	-0.162143	-0.159996	0.322139	12	0.160611	0.921237	0.515183	0.695286	0.675793	0.614785	29.9509	33.6148	44.8803
Smp_100110	DPH3	-0.00926561	-0.312871	0.322136	9	-0.283766	0.675562	1.03576	0.0473351	0.751994	0.183023	279.735	212.957	418.695
Smp_028670	carbonic anhydrase II	1.34783	-1.66992	0.322089	15	-4.19112	7.40812e-49	2.78646	1.51057e-21	-1.40466	1.44488e-06	574.762	28.7617	189.453
Smp_161370	deoxynucleotidyltransferase terminal interacting	-0.430918	0.109127	0.321791	9	0.874502	0.191937	0.344572	0.645283	1.21907	0.0585139	8.99641	16.1809	19.3006
Smp_141920	SH3 and multiple ankyrin repeat domains protein	0.211126	-0.53256	0.321435	4	-0.882284	0.111837	1.1068	0.038119	0.224512	0.750659	28.438	14.3564	29.5419
Smp_078060	hypothetical protein	0.466706	-0.788087	0.32138	4	-1.60407	0.0262395	1.48019	0.0440633	-0.123881	0.904977	24.5197	7.06419	19.8223
Smp_197410	DEP domain containing protein	-0.400384	0.0790652	0.321318	9	0.766725	0.27477	0.251282	0.752967	1.01801	0.132074	9.25673	15.2502	17.2041
Smp_017470	hypothetical protein	-0.155673	-0.165617	0.321291	9	0.119646	0.743952	0.691204	0.00911597	0.810851	0.00217908	221.102	225.523	339.711
Smp_128600	chromodomain helicase dna binding protein 5	-0.479475	0.158364	0.321112	9	1.00041	0.116644	0.350162	0.631048	1.35057	0.0288226	6.60354	13.1805	15.4192
Smp_111340	hypothetical protein	-0.188186	-0.132727	0.320913	9	0.142583	0.853505	0.73639	0.187612	0.878973	0.118427	256.844	278.057	429.894
Smp_056780	dynein light chain	-0.105869	-0.214935	0.320804	9	-0.0166283	0.983433	0.795355	0.0583723	0.778726	0.0721994	623.836	576.736	948.416
Smp_198290	paramyosin	-0.0840156	-0.236041	0.320056	9	-0.0858752	0.757482	0.827216	1.50147e-05	0.741341	0.000141592	139.196	123.375	205.75
Smp_180800	hypothetical protein	-0.625791	0.305757	0.320034	13	1.45189	5.00101e-05	0.109891	0.828113	1.56178	2.10169e-05	61.8517	161.794	165.444
Smp_127310	Type 2 dopamine receptor	1.88908	-2.20827	0.319194	15	-4.9626	1.06158e-08	3.06662	0.000918413	-1.89598	0.0362107	20.1269	0.349859	4.14083
Smp_170590	zinc transporter 5	-0.148335	-0.169704	0.318038	9	0.109423	0.876608	0.80589	0.0996091	0.915313	0.0641588	11.1627	11.4109	18.6882
Smp_005020	E3 ubiquitin protein ligase CBL B	-0.12116	-0.196837	0.317997	9	0.0204693	0.974211	0.717226	0.0453506	0.737696	0.0440735	55.156	52.1606	81.6192
Smp_062260	uridine cytidine kinase 2	0.191357	-0.509294	0.317937	4	-0.859804	0.0166284	1.18888	0.00059965	0.329077	0.446144	297.844	152.512	328.31
Smp_170530	upstream stimulatory factor 1	0.294597	-0.612473	0.317876	4	-1.095	0.143607	1.39198	0.0501175	0.296972	0.752142	34.6111	14.7961	37.3294
Smp_153190	hypothetical protein	-0.29033	-0.0269035	0.317233	9	0.417577	0.669528	0.691008	0.414098	1.10858	0.174282	4.91075	6.42241	9.99154
Smp_072660	ras GTPase activating protein 1	-0.0196217	-0.29729	0.316911	9	-0.223043	0.865369	0.809317	0.421476	0.586275	0.598554	8.79433	7.12998	11.7859
Smp_048980	ligand of numb protein	0.155918	-0.472123	0.316205	4	-0.720122	0.386294	1.14407	0.124751	0.42395	0.640772	44.2248	24.6118	53.2228
Smp_020450	UBX domain containing protein 6	-0.162421	-0.153755	0.316176	9	0.134606	0.750468	0.630827	0.0435652	0.765433	0.014142	130.406	135.566	195.852
Smp_143830	long chain fatty acid transport protein 1	-0.433321	0.117226	0.316095	9	0.95309	0.0994438	0.189848	0.79212	1.14294	0.0464721	20.0203	37.0697	39.4189
Smp_174450	surfeit locus protein 4	0.170084	-0.486081	0.315997	4	-0.786825	0.0249512	1.08899	0.00124525	0.302167	0.476372	547.383	291.902	590.564
Smp_096310	atypical protein kinase C	-0.295026	-0.0204077	0.315434	9	0.535288	0.197332	0.428026	0.307374	0.963314	0.0120989	61.2844	83.5547	106.647
Smp_002840	hypothetical protein	0.0445504	-0.359914	0.315364	4	-0.449278	0.059642	0.951542	1.61363e-05	0.502264	0.0358789	57.9945	39.7153	71.6973
Smp_145460	hypothetical protein	0.887556	-1.20256	0.315008	15	-2.81424	2.2303e-10	2.15589	2.29573e-06	-0.658356	0.213842	155.324	19.9603	86.2868
Smp_142420	hypothetical protein	1.89265	-2.20721	0.314559	15	-4.68078	2.02972e-06	2.72778	0.010866	-1.953	0.0598785	97.4595	1.76856	17.7068
Smp_020080	GTP binding protein (I) alpha subunit alpha	0.868444	-1.18236	0.313917	15	-2.58736	0.000931757	1.73849	0.0378468	-0.848869	0.360787	21.2635	2.82738	9.7108
Smp_132700	nephrin	1.69724	-2.01109	0.313851	15	-4.62638	2.25319e-08	2.84833	0.0011773	-1.77804	0.0470458	12.15	0.303851	2.77057
Smp_180200	zinc finger, CCHC domain containing 6	-0.431788	0.118496	0.313292	9	0.901494	0.197111	0.249535	0.761947	1.15103	0.0915417	6.28272	11.5706	12.8482
Smp_081450	ATP-diphosphohydrolase 2	-0.325679	0.0125254	0.313153	9	0.62599	0.0427038	0.379891	0.247594	1.00588	0.000660366	105.265	152.329	186.622
Smp_123610	phosphoinositide 3 kinase regulatory subunit 4	-0.0353044	-0.277665	0.31297	9	-0.24486	0.704591	0.962631	0.0503379	0.717771	0.175754	7.65741	6.09568	11.3407
Smp_066150	solute carrier family 35 member C2	-0.175992	-0.136203	0.312195	9	0.184088	0.762058	0.682916	0.13855	0.867004	0.0584266	193.33	206.214	313.393
Smp_197280	phosphatidylinositol 4 phosphate 5 kinase type	0.195438	-0.507414	0.311976	4	-0.876927	0.00589785	1.22774	7.62155e-05	0.350816	0.349431	106.256	53.7785	119.383
Smp_210870	lethal(2) giant larvae protein 2	0.265216	-0.57691	0.311693	4	-0.936654	0.322964	1.18102	0.183358	0.244367	0.83302	15.6548	7.34113	16.1504
Smp_212140	vam6:Vps39 protein like	0.174429	-0.485915	0.311486	9	-0.721729	0.538374	0.862021	0.425603	0.140292	0.919092	7.98019	4.39906	7.72771
Smp_194940	prostamide:prostaglandin F synthase	-0.448089	0.137125	0.310964	9	0.982814	0.023097	0.321055	0.525448	1.30387	0.00215393	106.064	197.225	233.431
Smp_168450	glycoprotein N acetylgalactosamine	0.92546	-1.23407	0.308609	15	-2.86139	3.83085e-08	2.18972	5.26693e-05	-0.671677	0.279513	52.8173	6.07893	28.8508
Smp_011220	glucosamine fructose 6 phosphate	0.506887	-0.814855	0.307968	11	-1.689	0.0666499	1.26665	0.189519	-0.422347	0.71903	9.91735	2.58217	6.26442
Smp_047090	hypothetical protein	-0.00214119	-0.305116	0.307257	9	-0.280998	0.638658	0.893918	0.0580355	0.61292	0.234349	105.174	79.9508	140.877
Smp_141220	oligomeric Golgi complex subunit 6	-0.0545623	-0.252047	0.306609	9	-0.173638	0.68149	0.775578	0.0151504	0.601941	0.0748297	65.5681	54.6901	88.3805
Smp_137490	PDZ domain protein	1.72756	-2.03407	0.306515	15	-4.58278	2.2831e-07	2.76826	0.00331102	-1.81451	0.0609488	45.3602	1.05872	9.96342
Smp_080420	jun protein	0.103461	-0.409886	0.306425	4	-0.591615	0.180121	1.03136	0.0103111	0.439742	0.350198	210.092	128.451	251.327
Smp_135840	hypothetical protein	-0.324572	0.019203	0.305369	9	0.610574	0.122337	0.442964	0.27522	1.05354	0.00435374	190.126	273.342	350.846
Smp_136800	phosphatidylinositol transfer protein	-0.163311	-0.141868	0.305179	9	0.208516	0.836096	0.816363	0.281592	1.02488	0.179281	9.00336	9.92758	17.0671
Smp_052470	o methyltransferase	0.149104	-0.454248	0.305143	4	-0.689745	0.224078	1.00937	0.0646	0.319624	0.626649	23.5599	13.538	25.1876
Smp_141150	phospholipase DDHD1	-0.00393545	-0.300073	0.304008	9	-0.292592	0.629917	0.893713	0.0630336	0.60112	0.255041	52.2101	40.1524	70.4858
Smp_132560	CCR4 NOT transcription complex subunit 10	-0.164074	-0.139928	0.304002	9	0.194088	0.803638	0.510776	0.413108	0.704863	0.252047	26.1835	28.2771	37.9441
Smp_048420	coiled coil domain containing protein 115	0.0583434	-0.362237	0.303894	9	-0.441793	0.492722	0.906863	0.0986308	0.465069	0.467985	100.819	69.3528	121.724
Smp_074900	docking protein 3	0.273305	-0.577192	0.303886	4	-0.977134	0.338501	0.971802	0.330086	-0.00533257	1	6.28105	2.6845	5.49265
Smp_145170	TBC1 domain family 0A	-0.0320548	-0.271669	0.303724	9	-0.215739	0.809798	0.639738	0.365027	0.423999	0.592064	38.4149	31.2013	45.8085
Smp_157590	Protein VTS1	-0.116798	-0.186864	0.303662	9	0.0503629	0.96605	0.624713	0.422434	0.675076	0.402614	33.5991	33.2618	48.4877
Smp_176540	protocadherin 18	1.12374	-1.42719	0.30345	15	-2.83808	0.0110125	1.75213	0.14302	-1.08596	0.413927	7.03398	0.577713	2.44845
Smp_094470	G patch domain and ankyrin repeats containing	0.221098	-0.524217	0.30312	4	-0.916006	0.0522128	1.07664	0.0226929	0.160636	0.799987	28.2791	13.893	27.1286
Smp_058240	Reticulon 4 (Neurite outgrowth inhibitor)	0.226746	-0.529758	0.303011	4	-0.931392	0.00403948	1.22288	0.000107012	0.291484	0.468928	548.893	264.733	586.218
Smp_085150	phosphoglucomutase 2	0.330446	-0.63338	0.302934	4	-1.24415	5.88533e-08	1.37333	2.14954e-09	0.129177	0.687919	179.317	70.6631	172.268
Smp_180920	hypothetical protein	-0.357078	0.0543793	0.302699	9	0.71397	0.22836	0.476515	0.437441	1.19049	0.0346681	22.3491	35.5418	47.7409
Smp_139440	coatomer subunit delta	0.0948977	-0.396448	0.30155	4	-0.581909	0.0915979	1.01707	0.0018117	0.435157	0.238679	137.272	85.6876	164.766
Smp_213180	allene oxide synthase-lipoxygenase protein-like	-0.214493	-0.0870544	0.301547	9	0.254198	0.763924	0.548157	0.434349	0.802355	0.24342	8.59171	9.87875	13.6633
Smp_132940	PRKCA binding protein	0.0592824	-0.360527	0.301245	4	-0.497086	0.027648	0.948772	6.99205e-06	0.451686	0.0530911	197.77	131.782	238.732
Smp_900030	ATP synthase F0 subunit 6	-0.187673	-0.11351	0.301183	9	0.239493	0.683609	0.64329	0.1719	0.882783	0.0564101	815.291	897.097	1326.62
Smp_134350	thyrotropin releasing hormone receptor	2.34013	-2.6403	0.300175	15	-6.00266	9.49623e-15	3.21077	0.000236002	-2.79189	1.49701e-06	33.0935	0.231536	3.60083
Smp_175570	protein memo1	-0.225029	-0.075075	0.300104	9	0.35889	0.361308	0.591379	0.0925821	0.950269	0.00494319	277.253	333.363	469.728
Smp_028200	Troponin I (TnI)	-0.175518	-0.124143	0.299662	9	0.173445	0.686729	0.681463	0.0372413	0.854908	0.00851277	67.7056	72.3831	109.379
Smp_140420	5' 3' exoribonuclease 1	-0.24744	-0.0519442	0.299384	9	0.405124	0.475782	0.443519	0.406705	0.848643	0.0890301	11.9272	15.1682	19.1078
Smp_186830	#N/A	0.200994	-0.49969	0.298696	4	-0.826296	0.172411	1.20333	0.037969	0.377033	0.590723	23.9652	12.4869	28.4524
Smp_127500	hypothetical protein	-0.753142	0.454647	0.298495	13	1.80898	0.000373447	-0.0926706	0.900325	1.71631	0.00141683	6.03326	21.0855	18.8078
Smp_074930	palmitoyltransferase ZDHHC20	0.202547	-0.500842	0.298295	4	-0.864174	0.0127567	1.20843	0.000302804	0.34426	0.404187	407.422	207.268	453.904
Smp_134440	NADP dependent malic enzyme, mitochondrial	-0.450097	0.151966	0.298131	9	1.00616	0.000575701	0.244162	0.489614	1.25032	1.78934e-05	63.6514	119.36	133.284
Smp_213460	hypothetical protein	0.525058	-0.822956	0.297898	11	-1.70499	0.017066	1.32653	0.07416	-0.378462	0.682866	125.391	33.4837	83.1762
Smp_159790	kinesin family A	1.49944	-1.79652	0.297084	15	-4.31618	1.09728e-10	2.66789	0.000148114	-1.64829	0.0228594	21.1675	0.824119	5.51285
Smp_186650	f actin capping protein beta subunit	-0.132563	-0.164297	0.296861	9	0.0883016	0.870451	0.625037	0.0955123	0.713339	0.0593755	269.04	265.926	389.053
Smp_129550	hypothetical protein	0.0508955	-0.347662	0.296767	9	-0.422037	0.518706	0.911214	0.0980738	0.489176	0.440892	15.7635	10.9614	19.7085
Smp_012410	28S ribosomal protein S22, mitochondrial	-0.17138	-0.125343	0.296723	9	0.192987	0.448804	0.599194	0.00420497	0.79218	0.00011971	119.367	128.559	181.154
Smp_179930	syntaxin 1a	-0.274783	-0.0215945	0.296377	9	0.475227	0.22189	0.49167	0.193484	0.966897	0.00658678	53.4379	70.7669	92.6263
Smp_096910	dolichyl pyrophosphate Man9GlcNAc2	-0.273991	-0.021961	0.295952	9	0.490827	0.150945	0.465128	0.16909	0.955955	0.00242397	52.4084	69.3952	89.4981
Smp_009320	transcription elongation factor b polypeptide 1	-0.0979676	-0.197675	0.295643	9	0.0340255	0.950385	0.715433	0.0391261	0.749459	0.0338541	592.255	564.285	869.097
Smp_091740	trafficking protein particle complex subunit	-0.0406403	-0.254882	0.295523	9	-0.167518	0.755201	0.78513	0.0475962	0.617612	0.144813	248.505	205.679	337.006
Smp_123180	NEDD4 E3 ubiquitin protein ligase WWP1	-0.154567	-0.140193	0.29476	9	0.176224	0.836937	0.470103	0.491514	0.646327	0.341971	56.8869	60.8091	79.1697
Smp_014020	cell cycle control protein 50a	-0.257147	-0.0376128	0.294759	9	0.440847	0.35896	0.507217	0.262703	0.948064	0.0260466	78.8454	100.501	135.76
Smp_186780	hypothetical protein	1.62641	-1.92083	0.294416	15	-4.44743	1.1794e-08	2.74329	0.00109372	-1.70415	0.0351653	90.8615	2.82366	22.2887
Smp_213040	26S proteasome non ATPase regulatory subunit	-0.129886	-0.164389	0.294275	9	0.109954	0.904547	0.854621	0.178504	0.964575	0.135179	19.7653	20.0502	35.1482
Smp_135880	Transmembrane protein 161B	-0.217509	-0.0757731	0.293282	9	0.314465	0.317886	0.546649	0.052405	0.861114	0.00157193	54.577	64.2042	87.9707
Smp_083540	Myotubularin protein 2	0.132419	-0.425369	0.29295	4	-0.662578	0.109145	0.996813	0.0100957	0.334235	0.483852	158.003	92.5326	176.349
Smp_150480	RNA binding motif single stranded interacting	0.905537	-1.19804	0.292505	15	-2.47429	0.0117771	1.74291	0.0917952	-0.731379	0.550853	15.9598	2.08762	7.68183
Smp_125680	DNA polymerase zeta catalytic subunit	-0.0731184	-0.219307	0.292425	9	-0.125935	0.884574	0.727216	0.245058	0.601281	0.371099	7.67501	6.79199	10.4304
Smp_158930	hypothetical protein	-1.44001	1.14812	0.291894	13	3.77439	4.16851e-26	-1.17672	0.00203921	2.59767	1.6715e-12	9.17562	124.319	51.161
Smp_210610	aspartyl aminopeptidase	-0.165068	-0.126566	0.291634	9	0.221721	0.823283	0.467175	0.571616	0.688896	0.399466	11.5476	12.6489	16.5772
Smp_166410	Mediator of RNA polymerase II transcription	0.105927	-0.397557	0.29163	9	-0.483687	0.668298	0.720965	0.469123	0.237278	0.845295	2.36686	1.48697	2.45297
Smp_128490	syntaxin binding protein 5	0.252811	-0.544181	0.29137	4	-1.00289	0.000991638	1.20713	6.54964e-05	0.204246	0.609412	60.0243	27.9734	60.4895
Smp_174690	TOM1 protein 2 like	0.491716	-0.782458	0.290742	4	-1.64921	0.00192829	1.42732	0.00877083	-0.221888	0.765516	48.3771	13.7978	36.2114
Smp_141120	hypothetical protein	-0.236675	-0.0538355	0.290511	9	0.39242	0.489949	0.578561	0.253325	0.97098	0.0448151	16.8272	21.3307	29.6069
Smp_041630	BCL2 apoptosis inhibitor,domain containing protein	-0.283165	-0.00707392	0.290239	9	0.517651	0.325999	0.434778	0.407406	0.952429	0.0471722	61.961	85.7217	106.555
Smp_122930	acyl coenzyme A dehydrogenase family	-0.209876	-0.0798679	0.289743	9	0.291894	0.671578	0.66307	0.242895	0.954964	0.0866943	11.6196	13.8025	20.6108
Smp_061540	sodium coupled neutral amino acid	-0.00718349	-0.282473	0.289657	9	-0.224189	0.830815	0.813767	0.309922	0.589578	0.509002	29.4003	23.4376	39.5831
Smp_043990	basigin	0.394249	-0.683697	0.289448	4	-1.41485	1.05101e-09	1.35949	5.05345e-09	-0.0553548	0.879352	772.175	270.304	650.916
Smp_027000	abhydrolase domain containing protein FAM108C1	-0.0237713	-0.265647	0.289419	9	-0.206586	0.467426	0.834908	0.000213282	0.628322	0.0077947	159.217	129.25	215.976
Smp_154650	CTD small phosphatase protein	-0.319856	0.0307259	0.28913	9	0.602907	0.289582	0.335077	0.579794	0.937985	0.0820746	9.30521	13.6101	15.9486
Smp_213400	e3 ubiquitin-protein ligase bre1	-0.320886	0.032925	0.287961	9	0.602242	0.322363	0.33844	0.598012	0.940682	0.0999009	8.28903	12.1805	14.306
Smp_130200	FTZ F1 nuclear receptor protein	-0.254806	-0.0330979	0.287904	9	0.441809	0.623189	0.413621	0.623951	0.855429	0.279184	13.1015	17.0662	21.6004
Smp_158730	sperm flagellar protein 2	0.98328	-1.27075	0.287472	15	-2.85031	0.000414495	1.86654	0.0313256	-0.983771	0.297723	4.25245	0.46657	1.76361
Smp_086690	dual specificity mitogen activated protein	0.0542888	-0.341583	0.287294	9	-0.417814	0.313125	0.846615	0.0200951	0.428801	0.30198	125.446	88.5976	147.986
Smp_202170	ras gtp binding protein	-0.387716	0.100493	0.287222	9	0.797314	0.315144	0.138135	0.888353	0.935449	0.237651	26.5312	45.7946	45.6661
Smp_170060	negative elongation factor D	-0.1271	-0.15991	0.28701	9	0.0488871	0.946042	0.590184	0.229758	0.639071	0.205274	109.212	106.851	152.245
Smp_064040	serine:threonine protein kinase PAK 1	-0.283566	-0.00294338	0.286509	9	0.484591	0.158938	0.38649	0.268409	0.871082	0.00669595	57.4335	76.5979	93.1021
Smp_186700	actin related protein 2:3 complex, subunit 1A	0.0688449	-0.355189	0.286344	4	-0.465555	0.194533	0.915929	0.00467353	0.450374	0.219077	237.419	160.762	284.223
Smp_000530	zinc finger transcription factor gli2	0.0346456	-0.320491	0.285846	9	-0.35326	0.692666	0.764546	0.301137	0.411286	0.629519	18.4541	13.6334	21.7393
Smp_127800	histone lysine N methyltransferase SETDB	1.06984	-1.35552	0.28568	15	-2.67892	0.0174336	1.78741	0.134135	-0.891511	0.519316	9.57045	0.903991	3.95285
Smp_094870	poly(p):ATP NAD kinase	-0.495457	0.209875	0.285582	9	1.13512	0.00539357	0.07744	0.895719	1.21256	0.00364163	34.4358	71.4976	71.0051
Smp_212830	nitrogen permease regulator 3 protein	0.248334	-0.533227	0.284893	4	-0.959186	0.110714	1.0977	0.0633608	0.138512	0.864746	9.10055	4.22272	8.85189
Smp_171620	methylthioadenosine phosphorylase	0.215334	-0.500135	0.284802	4	-0.881578	0.00392294	1.22723	3.65686e-05	0.345649	0.33815	186.225	94.3228	208.326
Smp_158760	dynein beta chain, ciliary	1.93358	-2.21757	0.283993	15	-5.27874	1.17722e-12	2.9849	0.000201386	-2.29384	0.00141117	5.24003	0.0847719	0.834268
Smp_006980	Mediator of RNA polymerase II transcription	-0.0651671	-0.218018	0.283186	9	-0.106695	0.885896	0.801868	0.11903	0.695173	0.201869	167.105	145.578	242.173
Smp_020170	high voltage-activated calcium channel Cav2A	1.2064	-1.48947	0.283066	15	-3.34446	7.20477e-05	2.05646	0.0234622	-1.288	0.179096	5.25992	0.374338	1.68229
Smp_059750	ubiquitin conjugating enzyme E2 J2	0.284109	-0.566942	0.282833	4	-1.05593	0.0143913	1.21807	0.00419352	0.16214	0.784235	247.254	107.645	241.621
Smp_145800	ribosome production factor 1	-0.611004	0.328396	0.282609	10	1.48241	1.66684e-11	-0.00556457	0.993424	1.47684	6.28422e-11	77.055	204.501	189.83
Smp_171960	Dehydrogenase:reductase SDR family	-0.186944	-0.0953181	0.282262	9	0.269996	0.383009	0.573951	0.0316766	0.843947	0.00114882	130.012	145.951	205.152
Smp_139910	Zinc finger CCCH domain containing protein 10	-0.127059	-0.155118	0.282176	9	0.0573667	0.954517	0.588967	0.412016	0.646334	0.381832	8.86108	8.96392	12.5173
Smp_123830	collagen alpha (xi) chain	1.57867	-1.86064	0.281976	15	-4.59027	4.0214e-14	2.85918	7.04375e-06	-1.73109	0.00669039	23.6084	0.780108	5.86608
Smp_197500	cln3:battenin	-0.112386	-0.169195	0.281581	9	0.063238	0.941323	0.71951	0.230833	0.782748	0.204477	36.732	36.6621	57.0891
Smp_197830	Ras association domain containing protein 1	0.0342827	-0.315831	0.281548	9	-0.315197	0.750795	0.774088	0.335685	0.458891	0.616693	32.0942	24.2386	38.9073
Smp_096370	Fibronectin type III domain containing protein	-0.638513	0.356966	0.281547	10	1.44034	0.0499475	0.114839	0.910641	1.55518	0.0369129	4.91685	13.7585	13.7925
Smp_075280	hypothetical protein	-0.0490238	-0.23205	0.281074	9	-0.0758776	0.931029	0.733943	0.229668	0.658065	0.309234	60.3392	53.6937	83.2458
Smp_134840	hypothetical protein	0.0804208	-0.360799	0.280378	9	-0.41878	0.715771	0.933257	0.325847	0.514477	0.636056	6.10728	4.18858	8.10137
Smp_056060	rhodopsin orphan GPCR	2.23991	-2.51965	0.279747	15	-6.04667	1.85497e-19	3.32963	6.89453e-06	-2.71704	7.15344e-08	30.2001	0.267433	3.50517
Smp_035410	39S ribosomal protein L24	0.139245	-0.418911	0.279666	9	-0.59218	0.494119	1.05751	0.161379	0.465331	0.603124	20.7135	12.7694	25.242
Smp_143110	protein clec16a	-0.0492924	-0.230213	0.279505	9	-0.10022	0.90744	0.731677	0.230665	0.631457	0.332768	17.176	15.287	23.6962
Smp_018710	DDB1 and CUL4 associated factor 7	0.30352	-0.582935	0.279415	4	-1.12863	1.21732e-08	1.26546	2.26794e-10	0.136835	0.614109	184.611	78.5066	178.064
Smp_200020	FAD NAD binding oxidoreductase	0.993304	-1.27236	0.279053	15	-2.80597	0.000179078	1.94847	0.0157644	-0.857502	0.3278	39.5753	4.43239	17.5972
Smp_047460	astacin protein	1.79008	-2.06875	0.278666	15	-5.06042	1.64617e-13	3.2153	7.19065e-06	-1.84512	0.0105137	53.774	1.15819	12.2578
Smp_147590	rac guanyl nucleotide exchange factor	-0.0219438	-0.256713	0.278657	9	-0.228923	0.804166	0.910883	0.187525	0.681959	0.365823	10.5507	8.41297	15.5813
Smp_129660	hypothetical protein	-0.187976	-0.0906338	0.27861	9	0.292885	0.761191	0.499588	0.546372	0.792473	0.328935	23.5851	27.8202	37.4805
Smp_171300	ATPase, H+ transporting, lysosomal accessory	0.533332	-0.810706	0.277374	4	-1.76844	3.7431e-07	1.55727	9.78617e-06	-0.211172	0.66148	291.196	78.1235	219.313
Smp_001160	sperm associated antigen 16 protein	0.943334	-1.22059	0.277256	15	-2.65553	0.00250988	2.45134	0.00595271	-0.20419	0.874486	20.0192	2.43581	15.2116
Smp_135420	hypothetical protein	1.03499	-1.31183	0.276842	15	-3.1318	8.50054e-07	2.15518	0.00162223	-0.976624	0.171998	3.95834	0.372909	1.7477
Smp_045980	hypothetical protein	0.0250369	-0.301865	0.276828	9	-0.298349	0.711543	0.770288	0.233491	0.471939	0.523099	41.0851	31.3525	50.8355
Smp_104720	GDP L fucose synthase	-0.10665	-0.170139	0.276789	9	0.0435376	0.931852	0.680736	0.0404515	0.724273	0.0318768	165.896	159.197	242.131
Smp_212870	28S ribosomal protein S18b, mitochondrial	-0.193237	-0.0833058	0.276543	9	0.286867	0.333175	0.528771	0.0451171	0.815638	0.00144124	89.1748	102.255	139.285
Smp_034940	protein C10orf118	0.219441	-0.495369	0.275928	4	-0.889858	0.223414	1.06575	0.124544	0.175891	0.851457	142.178	70.0678	144.181
Smp_173080	engulfment and cell motility protein 1	0.536094	-0.81192	0.275825	4	-1.76639	0.000584637	1.47286	0.00527214	-0.293535	0.670341	54.3207	14.8051	38.8364
Smp_158320	glypican 6	-0.0568231	-0.218768	0.275592	9	-0.101586	0.871386	0.645857	0.14302	0.54427	0.246875	76.5805	67.6379	98.535
Smp_042020	ectonucleoside triphosphate diphosphohydrolase	0.773038	-1.04832	0.275278	15	-2.06866	0.0671311	1.36357	0.250576	-0.705089	0.609537	57.1377	9.26832	28.2435
Smp_212950	anaphase promoting complex subunit 4	-0.442105	0.167058	0.275048	9	0.950623	0.016402	0.180997	0.715988	1.13162	0.00446794	15.1543	28.3701	29.7849
Smp_039810	muscleblind protein	0.284346	-0.559085	0.274739	4	-0.986998	0.20421	1.08312	0.14747	0.0961225	0.926596	149.806	68.4614	141.474
Smp_024220	hypothetical protein	0.224847	-0.499466	0.27462	4	-0.830326	0.356186	1.15838	0.163354	0.328053	0.754518	6.87567	3.59347	7.76981
Smp_049550	78 kDa glucose regulated protein	-0.119541	-0.15506	0.274601	9	0.0670217	0.837575	0.647386	0.00315541	0.714408	0.00114882	683.456	670.887	990.75
Smp_022130	TBC1 domain family 2B	-0.042299	-0.232046	0.274345	9	-0.132448	0.767093	0.647675	0.0487088	0.515228	0.141524	76.9069	65.9987	95.9039
Smp_167520	protein tyrosine phosphatase n9	-0.219606	-0.0543297	0.273936	9	0.352455	0.775069	0.606998	0.563076	0.959453	0.347788	9.41179	11.8415	16.7807
Smp_003410	60S ribosomal protein L23a	-0.338544	0.0646164	0.273928	9	0.681486	0.177774	0.31793	0.567655	0.999416	0.0378496	343.836	524.867	618.366
Smp_213080	choline phosphate cytidylyltransferase	-0.303519	0.0305393	0.272979	9	0.605309	0.345524	0.299889	0.66279	0.905198	0.142511	6.19805	9.13256	10.4372
Smp_016990	Methylosome subunit pICln	-0.506969	0.234373	0.272597	9	1.20683	8.41282e-05	0.117423	0.780114	1.32425	2.0109e-05	118.675	259.989	262.293
Smp_150140	RNA binding motif single stranded interacting	1.56494	-1.83697	0.27203	15	-4.09701	NA	2.407	NA	-1.69001	NA	15.4324	0.534941	3.57153
Smp_162270	ATP synthase mitochondrial F1 complex assembly	0.0607892	-0.332491	0.271702	9	-0.381746	0.51591	0.908271	0.0665001	0.526525	0.340677	34.8044	24.9598	44.6866
Smp_085830	hypothetical protein	0.3529	-0.62448	0.27158	4	-1.25893	3.48665e-07	1.25251	5.29201e-07	-0.0064207	0.993453	313.763	121.259	273.067
Smp_118860	Oxidoreductase HTATIP2	-0.170764	-0.100192	0.270956	9	0.230892	0.638257	0.494431	0.231373	0.725323	0.07274	72.0511	80.2305	104.23
Smp_134140	cAMP specific 3',5' cyclic phosphodiesterase 4D	1.57635	-1.84685	0.270505	15	-4.60622	2.94824e-18	2.84184	2.25118e-07	-1.76438	0.00152789	123.48	4.1723	30.6322
Smp_162810	dentin phosphoryn	1.1614	-1.43109	0.269696	15	-2.96511	0.0063023	1.71924	0.144443	-1.24587	0.322487	8.14579	0.646897	2.63752
Smp_152760	cyclin protein FAM58A	0.00702579	-0.276556	0.26953	9	-0.238705	0.790544	0.976278	0.147149	0.737573	0.312266	22.2313	17.4856	33.3364
Smp_134940	hypothetical protein	-0.186413	-0.0830054	0.269419	9	0.259492	0.570403	0.409243	0.309924	0.668735	0.084734	29.0172	32.949	40.9174
Smp_046360	Zinc finger protein 143	0.238326	-0.507262	0.268936	4	-0.936008	0.0976675	1.09499	0.044731	0.158984	0.832287	101.154	48.8311	100.878
Smp_149410	hypothetical protein	-0.286181	0.0176023	0.268578	9	0.580876	0.0307887	0.405089	0.149699	0.985965	0.000133513	126.892	178.112	221.209
Smp_124580	protocadherin 11	1.09308	-1.36162	0.268546	15	-2.91665	0.00158297	2.09098	0.0324192	-0.825674	0.466155	9.16111	0.861775	4.30596
Smp_163970	lysosomal protective protein	-1.13312	0.864601	0.26852	13	2.99761	6.18736e-18	-0.855431	0.0253884	2.14218	2.3561e-09	25.4158	195.518	100.859
Smp_155790	hypothetical protein	0.321926	-0.590061	0.268135	4	-1.14368	0.0144009	1.15062	0.0139366	0.00693957	0.996641	238.248	97.734	209.651
Smp_070310	ecotropic viral integration site 5 protein	0.154006	-0.421596	0.26759	9	-0.634706	0.444663	0.752629	0.335811	0.117923	0.908147	6.92724	4.04249	6.46562
Smp_176710	transcriptional factor nfil3:e4bp4	-1.51127	1.24408	0.267188	10	3.537	0.000315125	-1.26615	0.254225	2.27085	0.0322643	1.25634	21.4904	7.03949
Smp_157310	PDZ and LIM domain protein 7	1.1929	-1.46004	0.267136	15	-3.40802	3.66311e-06	2.17052	0.00654326	-1.2375	0.127706	19.0855	1.37924	6.57782
Smp_103280	coenzyme Q binding protein COQ10 A	-0.292487	0.0253977	0.26709	9	0.582889	0.0178883	0.348412	0.186077	0.931301	9.06632e-05	210.763	295.397	353.959
Smp_145430	hypothetical protein	-0.343171	0.0761866	0.266984	9	0.665044	0.346933	0.174855	0.833829	0.839898	0.223882	5.72382	8.80846	9.22872
Smp_139100	hypothetical protein	1.31752	-1.58446	0.266933	15	-3.71539	3.7431e-07	2.3777	0.00190145	-1.3377	0.110183	65.2955	3.7716	21.0547
Smp_197640	sodium leak channel non selective protein	1.41452	-1.68108	0.266565	15	-3.83428	5.5284e-06	2.2595	0.0125099	-1.57477	0.0940302	7.65421	0.364484	1.98429
Smp_012970	myotubularin	0.141179	-0.407692	0.266513	4	-0.646406	0.220369	1.06291	0.028158	0.4165	0.474262	9.85983	5.85486	11.7981
Smp_145630	protein SSXT	-0.244565	-0.0218879	0.266453	9	0.471424	0.282976	0.329397	0.463812	0.800821	0.0491169	99.207	129.323	152.105
Smp_210970	serine:threonine protein kinase MAK	0.358707	-0.625097	0.26639	4	-1.25105	0.00331267	1.30109	0.00233461	0.0500349	0.939129	47.7331	18.6026	43.6267
Smp_145830	serine rich repeat protein	-0.354148	0.0878933	0.266254	9	0.746569	0.385174	0.145357	0.888353	0.891926	0.288468	20.487	33.3737	34.7757
Smp_016780	alpha tubulin	0.626278	-0.891683	0.265405	11	-1.98913	0.000142872	1.47538	0.00741713	-0.513752	0.43137	39.9908	8.95641	24.1798
Smp_096780	transmembrane protein 165	-0.256062	-0.00924683	0.265309	9	0.489091	0.163233	0.411955	0.242895	0.901046	0.00569505	101.079	132.996	167.195
Smp_139150	sodium dependent glucose transporter 1	0.731391	-0.996549	0.265157	11	-2.23335	7.4978e-06	1.74109	0.00111975	-0.492262	0.421103	33.2078	6.18769	20.499
Smp_018030	vacuolar protein sorting associated protein 72	-0.204263	-0.0604002	0.264663	9	0.308784	0.715122	0.727714	0.289999	1.0365	0.12642	11.3916	13.3734	21.8565
Smp_175210	enhancer of rudimentary	0.0307646	-0.294308	0.263543	9	-0.328247	0.673306	0.846898	0.187612	0.518652	0.474349	29.2149	21.5021	37.7611
Smp_000130	hormone sensitive lipase	-0.128813	-0.134725	0.263538	9	0.100965	0.897582	0.419944	0.481424	0.520909	0.390181	37.6675	38.8177	48.091
Smp_210400	ATP dependent Clp protease proteolytic subunit	-0.0918884	-0.171291	0.26318	9	0.0358719	0.967827	0.694955	0.205903	0.730827	0.197121	155.732	149.196	229.864
Smp_166200	axin 1	-0.443907	0.181003	0.262904	9	0.99557	0.133107	0.161514	0.847974	1.15708	0.0795279	6.58526	13.275	13.4129
Smp_008660	gelsolin	-0.267312	0.00541771	0.261894	9	0.502273	0.0571554	0.376918	0.165312	0.879192	0.000412072	352.674	469.656	571.404
Smp_127040	rho GTPase activating protein 190	-0.425931	0.164364	0.261567	9	0.936998	0.0805109	0.0829276	0.910842	1.01993	0.0599936	7.20492	13.5371	13.0947
Smp_173210	oocyte zinc finger protein XlCOF6	-0.0445815	-0.216496	0.261078	9	-0.110656	0.895252	0.694892	0.243747	0.584236	0.360419	49.0683	42.2042	66.3753
Smp_168370	guanine nucleotide exchange factor VAV2	0.290989	-0.551606	0.260617	4	-1.07018	0.0227519	1.27826	0.00558462	0.208073	0.738675	33.3328	14.8762	34.0226
Smp_173660	hypothetical protein	-0.136775	-0.123515	0.26029	9	0.175276	0.787416	0.54963	0.283597	0.724906	0.157186	41.2926	43.9396	60.6406
Smp_167890	methionine R sulfoxide reductase B2	0.0882093	-0.348487	0.260278	4	-0.48103	0.208885	0.868902	0.0125698	0.387872	0.33672	180.123	120.915	206.2
Smp_032120	hypothetical protein	0.10746	-0.366808	0.259348	4	-0.526906	0.211884	0.903721	0.0193039	0.376815	0.408586	140.666	90.4573	159.829
Smp_016380	IQ motif and SEC7 domain containing protein	-0.36209	0.103101	0.258989	9	0.79385	0.311251	0.18758	0.840434	0.98143	0.199319	8.51359	14.4337	15.6198
Smp_178410	Clathrin light chain,domain containing protein	-0.103881	-0.154412	0.258294	9	0.0752399	0.890065	0.638223	0.0852835	0.713463	0.0570176	79.7922	78.8493	115.827
Smp_064390	protein TSSC4	-0.287254	0.0291416	0.258113	9	0.573962	0.330306	0.427895	0.474096	1.00186	0.0701858	9.12585	13.0066	16.8086
Smp_080120	TGF-beta receptor, Hybrid Protein Kinase, TKL group, STKR family, Type2 Subfamily	-0.0287736	-0.228683	0.257456	9	-0.116537	0.913374	0.537963	0.509759	0.421426	0.635417	17.5046	15.3104	20.82
Smp_061870	ubiquinol cytochrome c reductase, Rieske	-0.173564	-0.0838831	0.257447	9	0.261176	0.690681	0.548578	0.313496	0.809753	0.127859	310.599	348.667	484.196
Smp_066940	60S ribosomal protein L29	-0.239889	-0.0175263	0.257416	9	0.44114	0.479609	0.459389	0.435185	0.900528	0.101245	324.037	416.572	543.33
Smp_131950	exocyst complex component 2	0.179549	-0.436561	0.257012	4	-0.740701	0.0709941	0.920417	0.0211153	0.179716	0.73333	66.2385	36.8592	65.6999
Smp_125770	scythe:bat3	-0.193745	-0.0629097	0.256655	9	0.31136	0.429901	0.564283	0.101133	0.875643	0.00847773	47.2041	55.7146	77.0839
Smp_161130	oligomeric Golgi complex subunit 8	-0.201711	-0.0543393	0.256051	9	0.331355	0.721953	0.408768	0.625045	0.740124	0.35635	11.4706	14.0671	17.1612
Smp_210090	AP 3 complex subunit beta 2	0.232593	-0.487982	0.255389	4	-0.835301	0.255519	0.977808	0.161141	0.142507	0.880409	24.4037	12.4703	23.6713
Smp_139500	hypothetical protein	0.431014	-0.686379	0.255365	4	-1.40953	0.00388315	1.30801	0.00850555	-0.10152	0.888197	515.144	176.537	416.996
Smp_137410	calpain A	1.2216	-1.4766	0.255001	15	-3.65289	8.62691e-22	2.44933	1.09608e-09	-1.20356	0.00184004	39.7558	2.79587	14.7732
Smp_146640	like glycosyltransferase	2.03341	-2.28824	0.254834	15	-5.40012	1.97489e-11	3.45118	4.0866e-05	-1.94894	0.0221437	42.3578	0.604328	8.59653
Smp_214160	protein KRI1	-0.308255	0.0537651	0.25449	9	0.622409	0.470542	0.323643	0.717806	0.946052	0.237139	4.55003	7.01061	7.98458
Smp_190370	rab2	-0.0809245	-0.173278	0.254202	9	-0.0137538	0.982994	0.655163	0.0597865	0.641409	0.0734857	138.642	127.747	192.638
Smp_036250	protein slowmo	-0.355359	0.101553	0.253806	9	0.778805	0.00574234	0.191664	0.578101	0.970469	0.000577222	98.6576	159.289	169.775
Smp_131560	RNA polymerase II subunit A C terminal domain	-0.100949	-0.152571	0.25352	9	0.105706	0.926944	0.540104	0.541061	0.645809	0.478558	14.6725	14.8213	20.5429
Smp_159270	cln3:battenin	-0.0601735	-0.192968	0.253141	9	-0.028971	0.969632	0.675254	0.14167	0.646283	0.177569	97.0631	89.2875	133.824
Smp_041190	outer dense fiber protein 2	0.129092	-0.382051	0.252958	4	-0.595399	0.35175	0.873454	0.133911	0.278055	0.702036	78.2651	48.3286	84.7236
Smp_032790	hypothetical protein	0.28975	-0.542675	0.252925	4	-1.03544	0.0186175	1.1383	0.00911597	0.102864	0.870679	494.17	221.074	464.203
Smp_128380	glutamate synthase	1.32003	-1.57257	0.252538	15	-3.87357	1.14537e-14	2.39354	4.73459e-06	-1.48003	0.00620581	42.2705	2.4628	12.7694
Smp_103460	eukaryotic translation initiation factor 2	-0.25377	0.00142792	0.252342	9	0.496765	0.0876858	0.440055	0.131667	0.936819	0.000528423	496.319	658.596	834.105
Smp_154890	hypothetical protein	0.117986	-0.368552	0.250567	4	-0.577658	0.0607532	0.948102	0.00113731	0.370445	0.274359	197.306	123.395	226.696
Smp_158910	cyclin dependent protein kinase CDC28 regulatory	-0.123179	-0.1272	0.25038	9	0.122678	0.849257	0.561986	0.238935	0.684663	0.154015	391.029	399.493	559.107
Smp_163740	nesprin 1	1.7148	-1.96502	0.250224	15	-4.58556	1.29068e-08	2.57488	0.00286483	-2.01067	0.0200043	14.9958	0.394391	2.88921
Smp_194070	sorting nexin 14	0.0133591	-0.262882	0.249523	9	-0.203641	0.895262	0.839128	0.472521	0.635487	0.620791	9.52254	7.8022	13.439
Smp_073930	serine:threonine protein kinase Akt	0.110702	-0.359923	0.249221	4	-0.531362	0.163929	0.876574	0.012601	0.345212	0.409996	125.841	81.0853	140.391
Smp_034420	proteinase inhibitor I25	0.461852	-0.710299	0.248447	4	-1.52722	3.75649e-05	1.29763	0.000605379	-0.229588	0.647784	872.737	276.591	650.806
Smp_131820	hypothetical protein	-0.253917	0.00550865	0.248408	9	0.48291	0.566375	0.328269	0.693611	0.811178	0.290632	6.01926	8.10818	9.66063
Smp_077230	Golgi SNAP receptor complex	-0.159147	-0.0890359	0.248183	9	0.2418	0.61208	0.45522	0.261969	0.69702	0.0762408	203.123	225.06	290.683
Smp_155010	forkhead box protein J3	1.24846	-1.4959	0.247445	15	-3.32492	0.000234276	2.04041	0.0353074	-1.28451	0.215938	10.0967	0.700882	3.20958
Smp_132090	WD repeat containing protein 53	-0.100313	-0.146647	0.24696	9	0.073467	0.910792	0.51394	0.269986	0.587407	0.215978	317.676	311.402	421.687
Smp_142610	dual specificity tyrosine (Y) phosphorylation	0.0894886	-0.336276	0.246787	4	-0.486619	0.36034	0.876252	0.0639125	0.389634	0.48849	15.5551	10.4275	17.9848
Smp_133690	discoidin domain containing receptor 2	0.0384975	-0.285146	0.246649	9	-0.286093	0.744824	0.657207	0.365809	0.371113	0.654548	7.11892	5.47499	8.02189
Smp_139430	pleckstrin y domain containing family A	0.172552	-0.419084	0.246532	4	-0.669406	0.363754	0.819658	0.233491	0.150252	0.869116	66.3403	38.6787	64.5662
Smp_022700	protein tyrosine phosphatase protein	-0.0842221	-0.161709	0.245931	9	0.0244	0.97087	0.590112	0.136986	0.614512	0.131887	333.298	316.718	449.858
Smp_170510	cullin associated	-0.226812	-0.0184113	0.245224	9	0.420002	0.642224	0.352362	0.681127	0.772363	0.33689	25.0325	32.5589	38.4499
Smp_173670	lysine specific demethylase NO66	-0.320139	0.0750381	0.2451	9	0.66684	0.288916	0.317463	0.641688	0.984303	0.105775	11.1687	16.9619	20.4031
Smp_073540	prefoldin subunit 5	0.00802352	-0.253078	0.245054	9	-0.231892	0.671264	0.723349	0.0926036	0.491458	0.299117	325.476	256.948	403.294
Smp_148070	exocyst complex component 5	0.127604	-0.372615	0.245011	4	-0.597191	0.135696	0.903804	0.0155903	0.306614	0.506438	82.0107	50.5195	89.4495
Smp_150740	asparagine rich antigen	0.676461	-0.920793	0.244332	11	-1.98214	0.0112304	1.44621	0.077042	-0.535929	0.588041	18.6312	3.92508	10.7244
Smp_172730	Fatty aldehyde dehydrogenase	0.0447559	-0.288858	0.244102	9	-0.339716	0.285455	0.736479	0.00829762	0.396764	0.205074	205.968	152.034	238.491
Smp_210320	Homocysteine S methyltransferase ybgG	-0.812005	0.568774	0.24323	13	2.05231	6.00955e-05	-0.262501	0.687244	1.78981	0.000965526	5.51214	22.6044	18.1669
Smp_059930	cytochrome b c1 complex subunit 6	-0.0107487	-0.232476	0.243225	9	-0.17288	0.812155	0.796064	0.137813	0.623184	0.280862	322.739	266.575	442.948
Smp_089870	histone H2A	0.297486	-0.540626	0.24314	4	-1.04998	0.0120495	1.12748	0.00657834	0.0774916	0.899298	905.448	404.338	838.579
Smp_083880	G protein coupled receptor No9	1.23925	-1.48226	0.243016	15	-2.02828	0.194908	1.29	0.432016	-0.738274	0.69217	9.7924	0.707424	3.81822
Smp_173390	DnaJ protein subfamily C	-0.345832	0.103346	0.242486	9	0.780321	0.000242005	0.22916	0.363024	1.00948	2.87709e-06	54.7615	88.1175	97.3455
Smp_143730	nodal modulator 1	-0.25501	0.0126104	0.2424	9	0.514349	0.256588	0.257037	0.599706	0.771386	0.0721994	22.3767	30.5108	33.769
Smp_157920	SAC domain containing protein 3	0.296035	-0.538206	0.242171	11	-1.00551	0.183757	0.934552	0.214025	-0.0709623	0.947822	12.6541	5.75625	10.4026
Smp_169360	kinesin protein kif26a	1.46605	-1.70819	0.242133	15	-4.10411	7.6002e-09	2.55246	0.000802622	-1.55165	0.0395862	6.39907	0.270867	1.79796
Smp_009430	steroid dehydrogenase	-0.508191	0.266697	0.241494	10	1.24898	1.76041e-05	-0.0174613	0.97335	1.23152	3.39145e-05	102.155	227.286	211.983
Smp_094130	palmitoyltransferase zdhhc3	0.180996	-0.422457	0.241461	4	-0.717331	0.0208345	0.890689	0.00371274	0.173358	0.665767	39.552	22.2726	38.7196
Smp_040360	endoplasmic reticulum Golgi intermediate	0.118971	-0.360339	0.241368	4	-0.549732	0.378479	0.733663	0.201917	0.18393	0.803681	123.879	77.8289	124.536
Smp_140810	pyroglutamyl peptidase 1	-0.0544537	-0.185633	0.240086	12	-0.0521317	0.968919	0.347873	0.719416	0.295742	0.779422	53.3472	47.7218	57.9548
Smp_124770	hypothetical protein	0.0662071	-0.305803	0.239596	9	-0.392283	0.409225	0.907094	0.0268671	0.514811	0.258561	18.165	12.897	23.5076
Smp_134570	hypothetical protein	1.20866	-1.44819	0.239527	15	-3.38282	0.000128421	2.28174	0.0145407	-1.10108	0.290079	7.06348	0.490929	2.75031
Smp_199940	transmembrane 9 superfamily protein member	0.289501	-0.528838	0.239337	4	-1.01675	0.000916186	1.10663	0.000439498	0.0898815	0.841657	106.047	48.2519	98.3283
Smp_046740	dihydrolipoamide dehydrogenase	-0.174886	-0.0643977	0.239283	9	0.300725	0.273565	0.439281	0.0819473	0.740006	0.00214917	156.518	180.647	228.863
Smp_099150	Pleckstrin protein domain containing family	0.3957	-0.634626	0.238926	4	-1.30861	0.00299452	1.19525	0.00761306	-0.11336	0.860033	252.559	92.6525	203.277
Smp_029360	Proton coupled amino acid transporter 1	-0.146383	-0.0924126	0.238796	9	0.205454	0.567676	0.485109	0.106108	0.690562	0.0189594	44.3632	48.1039	62.9665
Smp_029040	protein unc 50	-0.00163269	-0.237071	0.238704	9	-0.198465	0.70603	0.657018	0.108522	0.458554	0.307482	172.775	139.944	208.663
Smp_160410	Transmembrane protein 106A	0.0952129	-0.333308	0.238095	9	-0.443037	0.213545	0.748679	0.02216	0.305642	0.431764	172.965	118.245	185.977
Smp_173990	rab11	-0.0792016	-0.158863	0.238065	9	0.0124337	0.978124	0.550659	0.0290611	0.563092	0.0285213	45.0844	42.7319	58.5718
Smp_074160	hypothetical protein	-0.0514577	-0.186518	0.237976	9	-0.0725087	0.935013	0.673137	0.286775	0.600628	0.370499	233.766	211.47	322.832
Smp_162550	protocadherin alpha 7	-0.590185	0.352247	0.237938	10	1.47086	0.0082132	-0.0215997	0.984893	1.44926	0.0115845	3.65572	9.96657	9.15204
Smp_212410	hyperpolarization activated cyclic	1.53534	-1.77314	0.237804	15	-4.09162	5.52509e-07	2.41065	0.00650269	-1.68097	0.0553646	8.16246	0.299966	2.01398
Smp_165480	hypothetical protein	1.68	-1.91776	0.23776	15	-3.90832	0.000665111	2.0018	0.114008	-1.90651	0.134528	18.9145	0.514128	3.3197
Smp_209080	#N/A	0.126542	-0.363588	0.237045	4	-0.574626	0.400343	1.0336	0.0931609	0.458977	0.524176	19.9397	12.4245	25.5767
Smp_203780	hypothetical protein	-0.0394144	-0.197397	0.236811	9	-0.0719751	0.915807	0.671156	0.155194	0.59918	0.229439	364.882	325.061	488.168
Smp_212900	SUN domain containing protein 2	0.0184045	-0.255212	0.236807	9	-0.218391	0.770775	0.759519	0.186849	0.541128	0.393268	10.7535	8.58448	13.9215
Smp_136260	Glutamine:fructose 6 phosphate aminotransferase	0.0923888	-0.328961	0.236572	9	-0.455151	0.203929	0.790507	0.0151051	0.335356	0.382149	209.416	142.352	231.29
Smp_043620	UMP CMP kinase	-0.101684	-0.134311	0.235995	9	0.0923213	0.779116	0.553861	0.0198671	0.646182	0.00671836	242.684	242.374	333.062
Smp_158240	fumarate hydratase	-0.255204	0.0193772	0.235827	9	0.503538	0.169448	0.245373	0.541397	0.748911	0.0329927	56.522	75.6281	83.8849
Smp_083980	FMRFamide activated amiloride sensitive sodium	1.8277	-2.06316	0.23546	15	-4.02567	0.000490192	2.0773	0.103387	-1.94837	0.126183	19.6242	0.410943	3.14061
Smp_088420	hypothetical protein	-0.430492	0.195514	0.234978	9	1.00795	0.0282607	0.152963	0.798809	1.16092	0.0117072	146.538	282.935	293.291
Smp_151600	neuronal calcium sensor 2	2.64707	-2.882	0.23493	15	-6.78256	3.57381e-18	3.45206	5.03034e-05	-3.33051	4.53939e-07	132.889	0.513064	9.63501
Smp_137540	apoptosis inducing factor 1, mitochondrial	-0.0664517	-0.16838	0.234832	9	-0.0216252	0.980644	0.814858	0.101911	0.793233	0.124465	16.7808	15.6034	26.1337
Smp_170400	nicalin (M28 family)	-0.0971911	-0.13755	0.234741	9	0.0638301	0.858613	0.51223	0.0371967	0.57606	0.0202041	51.3479	50.3577	67.2836
Smp_147830	cadherin	1.47255	-1.70725	0.234699	15	-3.96696	1.82977e-06	2.54345	0.00419957	-1.42351	0.121684	15.4628	0.677557	4.64917
Smp_150860	dual specificity	0.839329	-1.07378	0.234449	15	-2.41694	0.00373475	1.55319	0.0834028	-0.863755	0.384523	11.5482	1.67458	5.25932
Smp_213900	type IV collagen alpha 1 chain	1.31911	-1.55346	0.234343	15	-3.89358	1.26803e-13	2.53737	5.28483e-06	-1.3562	0.0131525	11.5313	0.648066	3.90382
Smp_133570	hypothetical protein	1.70329	-1.93704	0.233752	15	-4.00306	0.000221147	2.41233	0.0391261	-1.59072	0.191828	3.92329	0.106544	0.967716
Smp_021170	Vacuolar protein sorting associated protein 13A	0.0489996	-0.282484	0.233485	9	-0.344146	0.560098	0.783619	0.112164	0.439473	0.436549	6.572	4.88127	7.95026
Smp_025800	proteasome (prosome, macropain) subunit, beta	-0.112177	-0.121201	0.233378	9	0.128967	0.842768	0.602151	0.208258	0.731118	0.128892	318.989	327.871	466.263
Smp_149480	hypothetical protein	0.235216	-0.468523	0.233307	4	-0.85935	8.69116e-05	1.03967	2.17198e-06	0.180315	0.52971	508.667	260.427	504.711
Smp_175020	hypothetical protein	1.41273	-1.64575	0.233022	15	-3.81485	6.8492e-06	2.33919	0.00928375	-1.47566	0.125448	44.5072	2.17371	12.6942
Smp_170550	granulin	0.298409	-0.531157	0.232748	4	-1.04981	2.59367e-06	1.0643	1.97609e-06	0.0144912	0.971949	424.458	190.766	376.192
Smp_005050	Oxidoreductase HTATIP2	0.0155147	-0.248186	0.232672	9	-0.240974	0.549917	0.766903	0.0184882	0.525929	0.13396	109.642	87.8827	141.298
Smp_103310	signal recognition particle 9 kDa protein	0.106091	-0.338747	0.232656	4	-0.477368	0.29205	0.829602	0.041437	0.352234	0.46979	344.548	227.526	386.059
Smp_128120	protein polybromo 1	-0.217587	-0.0148837	0.23247	9	0.383651	0.599523	0.442826	0.509478	0.826478	0.192772	10.8271	13.659	17.2497
Smp_124660	IQ motif and SEC7 domain containing protein 1	0.87822	-1.11067	0.232446	15	-2.58571	1.81959e-05	1.86273	0.00358149	-0.722979	0.316588	10.7505	1.54998	5.55707
Smp_059920	hypothetical protein	-0.0958698	-0.136124	0.231994	9	0.0692065	0.859111	0.608991	0.0215214	0.678197	0.0109768	104.714	102.888	148.841
Smp_046690	polyubiquitin C	-0.205411	-0.0264966	0.231907	9	0.383364	0.585179	0.310965	0.651119	0.694329	0.28247	7.26502	8.91541	10.3191
Smp_137170	plasma membrane calcium transporting ATPase	1.48772	-1.71933	0.231616	15	-4.23411	1.4448e-13	2.75083	3.65987e-06	-1.48328	0.0175461	52.8271	2.24307	15.725
Smp_124170	dynein heavy chain	-0.170583	-0.0610137	0.231597	9	0.289866	0.653535	0.275881	0.648732	0.565747	0.322752	15.2935	17.6655	20.0697
Smp_017350	hypothetical protein	1.77448	-2.00561	0.231136	15	-4.79863	1.98206e-09	2.70203	0.00182247	-2.0966	0.0104944	40.6497	0.932163	7.303
Smp_161920	actin	0.915935	-1.14699	0.231054	15	-2.79681	1.47065e-10	1.96459	1.1268e-05	-0.832223	0.10099	3072.97	391.852	1492.78
Smp_209040	long chain fatty acid coenzyme A ligase	0.484365	-0.714513	0.230148	4	-1.58382	9.5766e-07	1.28575	0.000108408	-0.298069	0.481018	155.628	47.626	110.452
Smp_169870	cystinosin	0.285406	-0.515552	0.230147	4	-1.04516	0.107469	0.994778	0.126244	-0.0503801	0.959215	32.0839	14.6748	27.3333
Smp_136520	general transcription factor IIH subunit 2	-0.168266	-0.0610064	0.229273	9	0.282003	0.717714	0.581211	0.374544	0.863213	0.178059	10.6632	12.2963	17.5967
Smp_210250	cell cycle control protein 50a	0.114835	-0.344066	0.22923	4	-0.526223	0.0909306	0.81172	0.00605643	0.285497	0.421727	93.7315	60.6931	100.71
Smp_175850	eukaryotic translation initiation factor 2A	-0.173329	-0.0551962	0.228525	9	0.290206	0.72298	0.372021	0.616433	0.662227	0.3565	9.53938	10.8535	13.5725
Smp_087550	hypothetical protein	0.0717701	-0.300057	0.228287	9	-0.397267	0.495855	0.88938	0.0687952	0.492113	0.377255	938.187	661.366	1164.97
Smp_210100	mechanosensory protein 2	1.2854	-1.51344	0.228036	15	-3.79251	1.15661e-18	2.27151	5.60801e-07	-1.521	0.000668281	100.629	6.33931	29.7358
Smp_147410	cdk5 regulatory subunit associated protein 1	-0.029053	-0.198885	0.227938	9	-0.103392	0.890071	0.717049	0.178595	0.613657	0.277309	24.8711	21.6339	34.6645
Smp_007730	ER lumen protein retaining receptor	-0.0634245	-0.164398	0.227822	9	-0.0120151	0.990069	0.628608	0.163158	0.616593	0.188695	642.829	598.402	869.466
Smp_025670	Zinc finger, C2H2 type domain containing protein	0.0261188	-0.253833	0.227714	9	-0.254477	0.728647	0.744086	0.20483	0.489609	0.457211	11.1377	8.65389	13.9247
Smp_024970	CCR4 NOT transcription complex subunit 2	-0.270422	0.0430554	0.227366	9	0.609194	0.367347	0.214473	0.777251	0.823667	0.20245	40.718	59.6312	63.6785
Smp_139090	DENN domain containing protein 5B	0.0519408	-0.27891	0.226969	9	-0.246505	0.846913	0.79068	0.430241	0.544176	0.624445	6.76971	5.23851	8.80635
Smp_151230	prefoldin subunit 4	-0.228524	0.0016851	0.226838	9	0.432231	0.488241	0.402376	0.50041	0.834607	0.133119	177.947	227.724	284.729
Smp_039820	cysteine protease atg4b	0.169778	-0.39612	0.226342	4	-0.689954	0.222228	0.857055	0.108737	0.167101	0.814606	110.414	63.8433	109.848
Smp_031950	Programmed cell death protein 10	0.0879488	-0.314202	0.226253	4	-0.448855	0.220369	0.84564	0.0102189	0.396784	0.294666	326.068	221.368	377.576
Smp_064380	aspartate aminotransferase	-0.359001	0.133826	0.225175	9	0.838817	0.000561165	0.153716	0.616844	0.992533	5.18327e-05	84.8491	143.047	149.435
Smp_081380	hypothetical protein	-0.100515	-0.123507	0.224022	9	0.0957078	0.855143	0.515309	0.174865	0.611017	0.110256	109.105	109.957	147.675
Smp_066010	cytochrome b5 type B	0.253628	-0.477051	0.223423	4	-0.886909	0.0406997	1.02031	0.0161159	0.133398	0.82257	492.408	244.423	470.217
Smp_124520	hypothetical protein	0.689314	-0.912394	0.22308	12	-1.79261	0.124234	1.19693	0.328956	-0.595687	0.674402	10.7523	2.34718	5.68587
Smp_006040	hypothetical protein	1.42517	-1.64802	0.222846	15	-4.16459	2.38942e-26	2.53599	4.69421e-10	-1.6286	5.88147e-05	617.396	29.8289	167.579
Smp_154250	ring finger protein unkempt	-0.129977	-0.0924324	0.222409	9	0.147076	0.873222	0.394163	0.594677	0.541239	0.470515	12.6066	13.2531	16.65
Smp_001150	protein lunapark	-0.0468682	-0.175329	0.222197	9	-0.0549397	0.841231	0.578925	0.00172533	0.523986	0.00575415	186.777	169.068	235.151
Smp_191360	mitochondrial gtpase	-0.182619	-0.0395617	0.222181	9	0.298465	0.618549	0.373284	0.499792	0.671749	0.205318	8.34796	9.74698	11.8162
Smp_071630	rab-2,4,14, putative	0.251436	-0.473165	0.221728	4	-0.889387	9.24782e-05	0.942686	3.48104e-05	0.0532993	0.878309	890.245	445.802	806.987
Smp_000230	GDNF inducible zinc finger protein 1	-0.0612714	-0.159763	0.221035	9	-0.0156042	0.991484	0.539159	0.445728	0.523555	0.485971	58.9665	54.5245	76.4563
Smp_160270	hypothetical protein	0.0207166	-0.241616	0.2209	9	-0.247261	0.698672	0.717813	0.158075	0.470552	0.407173	31.0475	24.2466	38.5998
Smp_147930	acyl coenzyme A binding domain containing protein	-0.0497472	-0.171094	0.220841	9	-0.0100166	0.994037	0.709169	0.181735	0.699153	0.205074	47.3107	43.2184	68.6787
Smp_043030	hexokinase	1.3431	-1.56367	0.220572	15	-3.73217	1.03686e-07	2.37127	0.00127217	-1.3609	0.0866943	125.672	7.23334	39.0104
Smp_210950	zinc transporter ZIP11	-0.645539	0.425085	0.220454	10	1.6413	9.24782e-05	-0.236831	0.659636	1.40447	0.00166996	11.8982	35.9256	28.352
Smp_091990	histone deacetylase 8	-0.252774	0.0329349	0.219839	9	0.529768	0.115828	0.34611	0.32695	0.875878	0.00599351	90.9812	122.836	148.029
Smp_022330	dnaJ subfamily B	0.163825	-0.383648	0.219823	4	-0.627937	0.21541	0.932824	0.04601	0.304887	0.600101	310.813	185.723	336.462
Smp_059150	Mitochondrial inner membrane protein	-0.166571	-0.0531701	0.219741	9	0.275827	0.609899	0.430739	0.364399	0.706566	0.120219	66.888	76.5319	97.752
Smp_166370	hypothetical protein	-0.227584	0.00805738	0.219527	9	0.488049	0.452295	0.240862	0.724518	0.728912	0.229066	27.4612	36.2246	40.6247
Smp_010900	39S ribosomal protein L53, mitochondrial	-0.131979	-0.0875172	0.219497	9	0.223663	0.681138	0.509783	0.257322	0.733446	0.0965992	119.059	130.099	175.423
Smp_064330	ATP synthase subunit epsilon, mitochondrial	-0.109993	-0.109325	0.219318	9	0.13668	0.875872	0.525826	0.43314	0.662506	0.326099	229.023	235.035	324.746
Smp_009580	polyubiquitin	0.358113	-0.577007	0.218894	4	-1.18537	0.00893665	1.18511	0.00881339	-0.000262028	1	14918.6	5983.98	13088.1
Smp_213390	ribosomal protein s6 kinase beta 1	-0.198597	-0.0201609	0.218757	12	0.29626	0.886222	0.393842	0.830738	0.690102	0.69933	24.1552	31.3487	40.0973
Smp_200440	hypothetical protein	2.29132	-2.50973	0.218408	15	-6.36356	3.75852e-24	3.43965	1.28205e-07	-2.92392	6.02851e-06	1644.92	14.2207	169.94
Smp_123350	galanin receptor type 2	1.96373	-2.18185	0.218124	15	-5.33754	2.57785e-13	2.91966	0.000179738	-2.41789	0.00107783	76.4226	1.22441	11.1328
Smp_202650	hypothetical protein	-0.0406146	-0.177256	0.217871	9	-0.0482673	0.941275	0.5927	0.185786	0.544432	0.247768	313.781	280.887	401.601
Smp_173120	presqualene diphosphate phosphatase	0.409595	-0.627393	0.217798	4	-1.35509	6.79195e-08	1.15785	9.8309e-06	-0.197237	0.560177	187.369	68.0306	141.944
Smp_164720	zinc finger protein	-0.0834474	-0.134339	0.217786	9	0.0493018	0.954949	0.488198	0.435574	0.5375	0.406288	8.04464	7.94056	10.3338
Smp_179800	p21 activated protein kinase 1 Dpak1	-0.00935245	-0.208208	0.217561	9	-0.121632	0.916064	0.517096	0.567918	0.395464	0.688204	13.3607	11.6039	15.4758
Smp_122060	hypothetical protein	-0.104735	-0.112753	0.217488	9	0.114648	0.907516	0.383615	0.629434	0.498263	0.539895	15.9068	16.5351	19.7144
Smp_038820	NADPH dependent diflavin oxidoreductase 1	-0.261115	0.0440014	0.217113	9	0.498318	0.464413	0.391433	0.562061	0.889752	0.152779	6.72636	9.15958	11.5486
Smp_043110	hypothetical protein	1.39208	-1.60917	0.217094	15	-4.15458	5.4919e-67	2.62477	7.69544e-26	-1.52981	7.27467e-11	696.908	35.7179	210.589
Smp_000900	neuropeptide FF receptor 1	1.23065	-1.4472	0.216549	15	-3.3886	8.76034e-06	1.98625	0.0168927	-1.40235	0.0950874	35.9566	2.54976	10.7268
Smp_094820	vacuolar protein sorting associated protein VTA1	0.053643	-0.270176	0.216533	9	-0.330378	0.181	0.772998	0.000428538	0.44262	0.0641256	315.283	235.629	378.032
Smp_047410	hypothetical protein	-0.260964	0.0458956	0.215068	9	0.545624	0.190817	0.283408	0.533742	0.829032	0.0401722	52.9881	72.3537	84.2545
Smp_019430	Zinc finger, C2H2 type domain containing protein	-0.217366	0.0025927	0.214774	9	0.431859	0.220456	0.393328	0.259024	0.825187	0.0104765	185.903	237.529	292.297
Smp_176720	lipoma HMGIC fusion partner 3 protein like	1.38185	-1.59659	0.214742	15	-3.94832	1.76622e-10	2.38042	0.000479849	-1.5679	0.0110249	37.3607	1.93048	10.4845
Smp_144830	hypothetical protein	-0.00654675	-0.208186	0.214733	9	-0.129918	0.917342	0.47232	0.640282	0.342402	0.760196	5.52716	4.74051	6.36598
Smp_158810	hypothetical protein	-0.662998	0.448266	0.214732	10	1.71232	6.31286e-11	-0.261916	0.421552	1.4504	7.28114e-08	147.16	455.528	357.989
Smp_061920	uv excision repair protein rad23 b	0.0173733	-0.231732	0.214359	9	-0.22062	0.272028	0.67582	6.82177e-05	0.4552	0.0114978	603.37	484.248	725.384
Smp_161110	FH1:FH2 domain containing protein 3	-0.418467	0.204556	0.213911	10	1.00509	0.0854555	-0.0695684	0.933263	0.935519	0.125343	5.23279	10.1059	8.91934
Smp_046020	protein phosphatase 1 regulatory subunit 7	-0.101552	-0.112067	0.213619	9	0.111737	0.761033	0.510399	0.059872	0.622137	0.0216308	258.376	261.373	351.821
Smp_153500	guanylate cyclase	-0.563503	0.350047	0.213457	10	1.26911	0.157681	-0.180658	0.876887	1.08846	0.245895	4.14619	10.629	8.32726
Smp_021870	CCR4 NOT transcription complex subunit 7	-0.212371	-0.000307977	0.212679	9	0.440356	0.167626	0.308944	0.349319	0.7493	0.0119759	267.777	342.044	394.88
Smp_051510	pericentrin fragment	0.277739	-0.490235	0.212496	4	-0.955034	0.255894	0.986802	0.225898	0.0317684	0.982465	8.48367	4.02091	7.76165
Smp_002100	Vesicle transport protein SFT2B	0.21018	-0.42265	0.21247	4	-0.755279	0.0590548	0.839908	0.0332145	0.0846293	0.880221	215.656	117.001	198.314
Smp_029730	hypothetical protein	-0.118989	-0.0932959	0.212285	9	0.18166	0.853505	0.312798	0.708257	0.494458	0.553243	12.3735	13.4474	15.4887
Smp_099890	Receptor expression enhancing protein 5	0.653787	-0.866039	0.212252	4	-2.03671	1.99064e-14	1.53783	1.37297e-08	-0.498874	0.110951	1432.55	321.824	884.75
Smp_071590	TBX2 protein	-0.153046	-0.0591268	0.212172	9	0.293047	0.596432	0.437721	0.373012	0.730768	0.119681	85.4024	98.1056	124.442
Smp_146470	hypothetical protein	2.34445	-2.55654	0.212087	15	-6.07261	1.43139e-15	3.13633	0.000179301	-2.93628	1.12215e-05	56.1341	0.424179	5.35649
Smp_005010	chitobiosyldiphosphodolichol	0.00516907	-0.217238	0.212069	9	-0.200861	0.687054	0.687846	0.0760803	0.486986	0.249204	89.3104	72.8635	110.664
Smp_079910	transcription initiation factor TFIIE subunit	-0.179708	-0.032147	0.211855	9	0.327102	0.353025	0.350162	0.300493	0.677265	0.0324581	96.0434	113.04	135.786
Smp_052330	asparagine linked glycosylation protein 11	0.0926067	-0.30433	0.211723	4	-0.437832	0.18777	0.887818	0.00302313	0.449986	0.180732	96.5236	66.4874	116.558
Smp_170130	fos transcription factor	-0.592595	0.38096	0.211634	10	1.48182	0.0193472	-0.186399	0.827147	1.29542	0.0511376	8.00557	22.1252	18.1648
Smp_123680	hypothetical protein	0.66308	-0.874594	0.211514	4	-2.03407	1.39457e-09	1.58148	4.82298e-06	-0.452591	0.270124	131.451	29.6099	84.1005
Smp_107750	#N/A	0.0628151	-0.273953	0.211138	12	-0.238704	0.888325	0.71915	0.593744	0.480447	0.750659	25.5563	19.5341	32.4424
Smp_073470	Nuclear Receptor subfamily - retinoid-x-receptor (RXR)	-0.222651	0.011595	0.211056	9	0.44113	0.571385	0.288804	0.708906	0.729934	0.301825	20.7955	27.1492	31.3528
Smp_156950	ralbp1 associated eps domain containing protein	0.186015	-0.396802	0.210787	11	-0.674791	0.35423	0.757911	0.272297	0.0831201	0.928878	49.403	28.2966	46.3945
Smp_204680	hypothetical protein	0.327993	-0.538599	0.210606	4	-1.05577	0.0755067	1.07062	0.07416	0.0148501	0.992517	84.2958	37.0748	73.8613
Smp_068840	ous pairing protein 2 homolog	-1.13293	0.922636	0.210294	10	2.91744	4.74436e-08	-1.12041	0.0513698	1.79704	0.00211893	9.78792	76.0581	31.2615
Smp_153970	RILP protein	0.723993	-0.934152	0.210159	11	-2.20089	2.15277e-07	1.54531	0.00048142	-0.655572	0.192218	161.113	31.6847	88.9736
Smp_167860	nipped b protein	-0.0808656	-0.128832	0.209698	9	0.0603911	0.962746	0.68971	0.429132	0.750101	0.405537	6.74668	6.80798	10.2477
Smp_210360	orm1 protein 2	0.107794	-0.316627	0.208833	4	-0.45522	0.323695	0.776525	0.061123	0.321304	0.519743	223.05	150.063	244.799
Smp_005900	BAG family molecular chaperone regulator 3	0.156379	-0.365042	0.208663	4	-0.603949	0.0577694	0.842139	0.00571064	0.23819	0.533688	234.136	144.341	242.249
Smp_091240	Voltage dependent anion selective channel	-0.0312342	-0.177209	0.208444	9	-0.0643326	0.921237	0.62179	0.166645	0.557458	0.239887	580.114	515.702	753.042
Smp_163850	hypothetical protein	-0.505111	0.297801	0.20731	10	1.29016	0.00515186	-0.0877307	0.895659	1.20243	0.0122336	31.7903	74.1514	65.6136
Smp_051300	tar DNA binding protein	-0.185309	-0.0219471	0.207256	9	0.39326	0.286967	0.334213	0.364199	0.727473	0.0309446	149.478	182.421	216.406
Smp_108320	#N/A	0.260734	-0.467868	0.207134	11	-0.85277	0.272278	0.804251	0.300493	-0.0485192	0.966759	62.8862	31.7808	51.8773
Smp_165800	ATP binding cassette sub family A	0.00277611	-0.209686	0.206909	9	-0.151937	0.817283	0.606734	0.220665	0.454796	0.402614	11.2219	9.46558	13.4245
Smp_144920	coiled coil domain containing protein 134	-0.177642	-0.0291017	0.206744	9	0.331983	0.380218	0.271316	0.472686	0.603298	0.0826215	99.8196	118.46	133.054
Smp_197390	disintegrin and metalloproteinase	-0.0826309	-0.123918	0.206549	9	0.0781379	0.894069	0.533436	0.194928	0.611574	0.143404	28.3908	28.1164	38.1083
Smp_152090	hypothetical protein	0.883229	-1.08928	0.206047	15	-2.45128	0.00434505	1.56433	0.0931663	-0.88695	0.384465	7.35793	1.07495	3.24483
Smp_126460	hypothetical protein	0.248476	-0.454511	0.206034	4	-0.869849	0.00632139	0.951897	0.00278531	0.0820474	0.859136	172.569	87.9212	159.241
Smp_201820	RING finger protein 38	0.106978	-0.31291	0.205931	9	-0.429571	0.638667	0.711616	0.372176	0.282045	0.76971	8.87787	6.266	9.45989
Smp_153960	presenilin	-0.0763185	-0.128687	0.205005	9	0.0703904	0.828107	0.510584	0.0226939	0.580974	0.00973331	235.32	230.283	308.702
Smp_096270	valyl tRNA synthetase	-0.409252	0.204307	0.204944	10	0.94497	0.165343	-0.0514171	0.959177	0.893553	0.208597	3.53032	6.71907	5.96227
Smp_170350	g protein coupled receptor	0.0979165	-0.302756	0.20484	9	-0.432148	0.164035	0.671482	0.0200844	0.239334	0.499053	194.531	134.309	200.884
Smp_029850	three prime histone mRNA exonuclease 1	0.156853	-0.360918	0.204065	11	-0.590579	0.322388	0.6908	0.220755	0.100222	0.895166	61.6582	38.1134	57.843
Smp_171900	NADH dehydrogenase (ubiquinone) iron sulfur	-0.084656	-0.119124	0.20378	9	0.0985822	0.865905	0.541862	0.196251	0.640444	0.130708	391.416	393.047	534.856
Smp_083970	hypothetical protein	-0.0724333	-0.131334	0.203768	9	0.0652841	0.922496	0.469792	0.33263	0.535076	0.280247	269.179	263.173	341.785
Smp_128610	cytochrome c oxidase subunit IV	0.109983	-0.313433	0.20345	9	-0.45045	0.3794	0.758532	0.096074	0.308082	0.575546	624.985	422.265	678.772
Smp_013870	hypothetical protein	0.0443128	-0.247379	0.203067	9	-0.29196	0.580618	0.660921	0.133236	0.368961	0.467992	144.868	110.351	165.229
Smp_083150	coiled coil domain containing protein 75	-0.0531838	-0.149765	0.202949	9	0.000427611	1	0.527083	0.152988	0.52751	0.167836	150.663	140.492	191.317
Smp_074030	Receptor protein-tyrosine kinase	-0.159225	-0.0431098	0.202335	9	0.309258	0.733753	0.273707	0.748097	0.582965	0.473707	12.667	15.2676	17.0042
Smp_198850	vacuolar sorting protein SNF8	0.189782	-0.391991	0.202209	4	-0.694408	0.00510073	0.891309	0.000271869	0.196901	0.531317	221.558	127.06	223.025
Smp_081820	synaptic glycoprotein sc2	-0.185348	-0.0166741	0.202022	9	0.382948	0.330806	0.303742	0.441948	0.68669	0.0562225	214.05	261.595	302.173
Smp_062630	dynactin subunit	-0.0153934	-0.186554	0.201948	9	-0.12471	0.62932	0.581332	0.00290562	0.456621	0.0256623	314.162	270.626	381.062
Smp_156080	dynein heavy chain	1.42387	-1.62564	0.20177	15	-4.07612	3.59703e-14	2.50644	1.22634e-05	-1.56968	0.00457265	5.89855	0.298855	1.67728
Smp_140200	flowering locus c variant	0.780977	-0.98263	0.201653	11	-2.39606	2.0903e-13	1.64534	1.09534e-06	-0.750719	0.041833	340.884	59.5003	177.984
Smp_200750	hypothetical protein	2.23295	-2.43402	0.201076	15	-5.42092	4.2764e-10	2.82737	0.00410084	-2.59355	0.000764387	111.321	1.0952	14.4392
Smp_129210	tyrosyl tRNA synthetase	-0.126137	-0.0746018	0.200739	9	0.180992	0.806114	0.362465	0.554783	0.543457	0.36764	60.9154	65.445	79.6448
Smp_060010	NSFL1 cofactor p47	-0.0018887	-0.198838	0.200727	9	-0.147938	0.672533	0.639636	0.0160268	0.491697	0.0811811	141.185	118.985	174.981
Smp_032280	RNA binding protein MEX3B	-0.685218	0.484509	0.200709	10	1.64919	0.0810877	-0.301161	0.801294	1.34803	0.177559	4.03065	14.1096	9.83338
Smp_195000	ng dimethylarginine dimethylaminohydrolase	-0.0671036	-0.133507	0.200611	9	0.0334187	0.925045	0.569402	0.013297	0.60282	0.00957374	371.408	356.03	497.071
[truncated: 5,156 more rows]
