# Supplementary material for: Flatworm-specific transcriptional regulators promote the specification of tegumental progenitors in Schistosoma mansoni
Source: eLife. 2018 Mar 20;7:e33221. doi: 10.7554/eLife.33221 (PMC5927768; doi:10.7554/eLife.33221)
Supplement: Supplementary file 3. [file elife-33221-supp3.xlsx]

## Sheet: Supplementary File 3
Insert	Name	Abbreviation	Cluster	Expressed in parenchymal tsp2+ cell?	Expressed in surface tsp2+ cell?	Expressed in tegument?	Expressed in other cells?
Smp_148080	hypothetical protein	Smp_148080	3	Y	Y	Y	N
Smp_166890	ATPase, putative	ATPase	3	N	N	Y	N
Smp_181530	putative tetraspanin	tsp-2	3	Y	Y	N	N
Smp_195180	antigenic integral membrane glycoprotein	sm25	3	N	Y	N	N
Smp_195190	13 kDa tegumental antigen Sm13	sm13	3	N	Y	N	N
Smp_049580	putative zinc finger protein	zfp-1-1	3	Y	N	N	N
Smp_210790	putative z-protein (S1r protein)	z-protein	5	Y	Y	Y	N
Smp_099690	putative rer1 protein	rer1	5	Y	N	N	N
Smp_150380	sphingomyelin synthetase-related	sgms1	5	Y	Y	Y	N
Smp_198970	85 kD calcium-independent phospholipase A2 (Ipla2), putative	pla2	5	N	N	Y	N
Smp_003230	endophilin B1	endophilin b1-1	5	N	Y	Y	N
Smp_141010	Fer-1-related	dysferlin	5	N	Y	Y	N
Smp_037230	fimbrin, putative	fimbrin	5	N	Y	Y	N
Smp_140330	Epsin 4/enthoprotin, putative	epsin4	5	Y	Y	Y	N
Smp_077720	putative annexin	annexin b2	5	N	N	Y	N
Smp_105410	Glucose transport protein	gtp-4	5	N	N	Y	N
Smp_153390	Nucleotide pyrophosphatase/phosphodiesterase 5	npp-5	5	N	N	Y	N
Smp_214190	Calpain	calp	5	N	N	Y	N
Smp_166340	CD59-like	CD59-like	5	N	N	Y	Y
Smp_190970	Stard10 protein, putative	pctp	5	Y	N	Y	N
Smp_156960	nardilysin (m16 family)	nrdc	5	N	N	Y	Y
Smp_140510	tmem56	tmem56	5	N	N	Y	N
Smp_194050	clumping factor A	clfA	5	N	Y	N	Y
Smp_176300	dynein heavy chain	dhc	5	Y	N	N	N
Smp_011830	hypothetical protein	Smp_011830	5	N	N	N	Y
Smp_046630	hypothetical protein	Smp_046630	5	N	N	N	Y
Smp_089240	Putative beta-1,2-n-acetylglucosaminyltransferase II	mgat2	8	N	N	Y	N
Smp_163720	endophilin B1	endophilin b1-2	14	N	N	Y	Y
Smp_176940.1	Putative cationic amino acid transporter	caat	14	Y	Y	N	N
