# Supplementary material for: Flatworm-specific transcriptional regulators promote the specification of tegumental progenitors in Schistosoma mansoni
Source: eLife. 2018 Mar 20;7:e33221. doi: 10.7554/eLife.33221 (PMC5927768; doi:10.7554/eLife.33221)
Supplement: Supplementary file 4. [file elife-33221-supp4.xlsx]

## Sheet: Control_vs_ZFP1-1(RNAi)
Smp_ID	baseMean	log2FoldChange	lfcSE	stat	pvalue	padj	identity	Cluster #	MB_Cluster IR Rest log2	MB_Cluster Neo log2	MB_Cluster TSP-2 high log2	baseMean (FACS Data)	log2FoldChange (tsp-2HI_v_IR_REST)	padj (tsp-2HI_v_IR_REST)	log2FoldChange (Neo_v_IR_REST)	padj (Neo_v_IR_REST))	log2FoldChange (tsp-2HI_v_Neo)	padj (tsp-2HI_v_Neo)
Smp_159050	3776.32	-0.395533	0.169085	-2.33925	0.0193224	0.169159	semaphorin 5B	1	0.895355	-0.871383	-0.0239721	54.1187	-1.12759	0.15104	-2.27093	0.001106	1.14334	0.140428
Smp_038530	3036.48	-0.0947904	0.22424	-0.422718	0.672501	0.999981	dual specificity protein phosphatase 14	1	0.89068	-0.839561	-0.0511192	78.8622	-1.17611	0.0848165	-2.2068	0.000330202	1.03069	0.13475
Smp_212330	548.88	-0.125417	0.23243	-0.539592	0.589478	0.993584	DNA directed RNA polymerase III largest subunit	1	0.806893	-0.659199	-0.147694	47.9084	-1.19435	0.0117291	-1.9217	9.11e-06	0.727348	0.16359
Smp_102960	2145.12	-0.052028	0.125603	-0.414225	0.678709	0.999981	hypothetical protein	1	0.816907	-0.584811	-0.232096	310.898	-1.34599	6.5e-06	-1.84306	9.61e-11	0.497074	0.141362
Smp_102750	222.921	0.653421	0.1716	3.80781	0.000140204	0.0029909	Zinc finger MYND domain containing protein 12	1	1.01056	-0.875967	-0.134595	47.2335	-1.35372	0.0122919	-2.49074	6.22e-07	1.13702	0.0484996
Smp_157960	824.387	-0.0442191	0.161027	-0.274607	0.783618	0.999981	lisH domain containing protein ARMC9	1	0.903802	-0.813737	-0.0900645	38.4833	-1.37055	0.148405	-2.1234	0.0139034	0.752842	0.460451
Smp_179620	247.56	0.316154	0.207657	1.52249	0.127887	0.588764	hypothetical protein	1	0.850222	-0.617863	-0.232359	94.2047	-1.37672	0.000204229	-1.94543	1.96e-08	0.568711	0.181493
Smp_097370	421.334	0.0619036	0.14944	0.414238	0.6787	0.999981	fructose 1,6 bisphosphatase	1	0.726887	-0.384646	-0.342241	245.915	-1.37836	7.48e-05	-1.46339	1.3e-05	0.0850285	0.867461
Smp_155530	131.165	-0.0713534	0.221338	-0.322373	0.74717	0.999981	serine protease inhibitors serpins	1	0.950053	-0.704358	-0.245695	23.3683	-1.40874	0.0614754	-2.11508	0.00203615	0.706335	0.409161
Smp_051990	3757.93	-0.0537817	0.122145	-0.44031	0.659713	0.999981	kyphoscoliosis peptidase	1	0.707075	-0.365311	-0.341764	98.4327	-1.41039	0.0150958	-1.38034	0.0138084	-0.0300443	0.975942
Smp_144550	2237.8	-0.0728242	0.139609	-0.52163	0.601928	0.996125	chromobox protein (chromobox 1)	1	0.835523	-0.575271	-0.260252	100.413	-1.43778	0.0876591	-1.71808	0.0314323	0.280297	0.789161
Smp_124540	2395.71	-0.0597082	0.200904	-0.297199	0.766315	0.999981	voltage dependent calcium channel subunit	1	0.724248	-0.203956	-0.520291	35.3583	-1.43819	0.0398966	-1.22614	0.0670418	-0.21205	0.818346
Smp_168070	3732.62	-0.0300275	0.185314	-0.162036	0.871277	0.999981	TNFR	1	0.897198	-0.639147	-0.258051	380.659	-1.4438	0.00572769	-2.03911	3.57e-05	0.59531	0.305203
Smp_048560	2397.26	-0.105542	0.113872	-0.926846	0.354006	0.893988	Four and a half LIM domains protein 2	1	0.864273	-0.532956	-0.331317	488.273	-1.44661	6.56e-06	-1.87021	1.49e-09	0.423604	0.254953
Smp_040190	5656.69	0.0734885	0.116397	0.631363	0.527803	0.979383	serine:threonine protein kinase SIK2	1	0.651431	-0.215029	-0.436402	661.007	-1.44684	0.000714161	-1.08622	0.0122095	-0.360614	0.478665
Smp_163920	2222.11	0.0768879	0.126314	0.608706	0.542719	0.985376	hemicentin 1	1	0.878329	-0.546311	-0.332018	38.9703	-1.45058	0.122105	-1.69779	0.0559897	0.247216	0.835354
Smp_214000	1273.98	-0.0544427	0.187041	-0.291074	0.770995	0.999981	serine/threonine-protein phosphatase	1	0.824684	-0.553512	-0.271172	183.969	-1.4513	0.000182452	-1.8274	7.34e-07	0.376099	0.420498
Smp_148130	1524.39	0.450563	0.200366	2.2487	0.0245318	0.200475	fas binding factor 1	1	0.804037	-0.291745	-0.512292	146.179	-1.45848	0.0466769	-1.34968	0.0623974	-0.108804	0.915994
Smp_127940	5775.71	0.13855	0.164684	0.841308	0.400175	0.92143	sodium driven chloride bicarbonate exchanger	1	0.808488	-0.583321	-0.225167	177.005	-1.46029	0.0215281	-1.80001	0.00283315	0.339713	0.658374
Smp_150870	445.584	0.518348	0.132731	3.90526	9.41e-05	0.00212941	leucine rich repeat containing protein 27	1	0.926706	-0.593612	-0.333094	61.9315	-1.47057	0.0190529	-1.97693	0.000716643	0.506362	0.488159
Smp_087870	500.906	-0.0345645	0.125499	-0.275417	0.782996	0.999981	hypothetical protein	1	0.871041	-0.63362	-0.23742	44.2333	-1.47767	0.0232897	-1.92347	0.0013862	0.445794	0.570527
Smp_153310	9937.34	0.102751	0.190658	0.538928	0.589937	0.993584	cell polarity protein	1	0.657353	-0.190653	-0.4667	3364.42	-1.4794	9.35e-06	-1.04402	0.00222327	-0.435379	0.256105
Smp_097640	376.634	0.200758	0.195822	1.0252	0.305267	0.852624	protein FAM194B	1	0.70955	-0.27572	-0.433831	33.3209	-1.48758	0.0627486	-1.23498	0.116609	-0.252602	0.804829
Smp_026540	2453.99	0.0405683	0.161512	0.251178	0.801677	0.999981	clathrin coat associated protein ap 50	1	0.785264	-0.524645	-0.260619	409.722	-1.49453	0.0145807	-1.67653	0.00450405	0.181994	0.823536
Smp_147000	1089.94	-0.102259	0.135823	-0.752881	0.451522	0.949389	syntenin 2	1	0.836759	-0.495511	-0.341248	274.883	-1.5296	4.15e-05	-1.75868	9.88e-07	0.22908	0.633719
Smp_142600	3137.72	0.0478689	0.125761	0.380635	0.703474	0.999981	capicua protein	1	0.93662	-0.562247	-0.374373	151.347	-1.5318	0.0248594	-1.90542	0.00325856	0.373613	0.648523
Smp_173790	3960.43	-0.0631803	0.100984	-0.625649	0.531545	0.981345	o acyltransferase (membrane bound) domain	1	0.746011	-0.391915	-0.354096	426.959	-1.53476	6.01e-07	-1.50937	4.59e-07	-0.0253849	0.961459
Smp_070090	836.344	-0.0381816	0.200637	-0.190302	0.849073	0.999981	hematopoietic lineage cell specific protein	1	0.957607	-0.732641	-0.224966	178.327	-1.55697	1.47e-05	-2.28832	2.2e-11	0.731346	0.066848
Smp_010250	2928.25	-0.0663622	0.127834	-0.519128	0.603671	0.996125	triple functional domain protein	1	0.667768	-0.0814413	-0.586326	474.717	-1.5614	8.13e-06	-0.914587	0.0110125	-0.646812	0.0920457
Smp_166790	1059.77	0.068566	0.162496	0.421955	0.673058	0.999981	zinc transporter ZIP13	1	0.656475	-0.232349	-0.424126	324.24	-1.56324	0.00051623	-1.1247	0.0134753	-0.438533	0.407986
Smp_135170	1867.03	0.455996	0.105945	4.30409	1.68e-05	0.000473368	hypothetical protein	1	0.777365	-0.397789	-0.379576	307.791	-1.5653	1.97e-09	-1.5692	3.62e-10	0.00389427	0.998422
Smp_068750	44.397	0.487432	0.391589	1.24475	0.213222	0.751787	hypothetical protein	1	0.739891	-0.258526	-0.481365	56.2275	-1.57159	0.00849082	-1.21952	0.0336034	-0.352073	0.632612
Smp_123430	121.871	0.615244	0.241234	2.55041	0.0107598	0.108689	coiled coil domain containing protein	1	1.02418	-0.818201	-0.205975	21.9975	-1.5755	0.0494613	-2.36033	0.00129723	0.784829	0.390175
Smp_076010	1394.78	-0.25928	0.208418	-1.24404	0.213486	0.751787	hypothetical protein	1	0.935069	-0.678287	-0.256782	105.282	-1.58214	1.58e-05	-2.17576	2.51e-10	0.59362	0.166785
Smp_199430	242.014	0.767573	0.219354	3.49924	0.000466582	0.00835667	nephrocystin 4	1	0.925334	-0.44834	-0.476993	18.0632	-1.58446	NA	-1.40816	NA	-0.1763	NA
Smp_141410	2343	0.0906747	0.131857	0.687672	0.491659	0.961947	cell adhesion molecule	1	0.885949	-0.553329	-0.33262	134.479	-1.58739	3.18e-05	-1.92933	1.03e-07	0.341937	0.469123
Smp_196700	420.737	0.110677	0.18803	0.588615	0.55612	0.985603	Bardet Biedl syndrome 2 protein	1	0.900438	-0.476818	-0.42362	26.0371	-1.59848	0.0555874	-1.77253	0.0235543	0.174047	0.879276
Smp_141530	569.074	0.0180519	0.21158	0.0853195	0.932007	0.999981	hypothetical protein	1	0.850313	-0.552418	-0.297895	82.2163	-1.60286	0.0175685	-1.78446	0.00545936	0.181603	0.842062
Smp_118970	1058.91	0.00647433	0.152185	0.0425424	0.966066	0.999981	#N/A	1	0.772525	-0.282812	-0.489713	22.1424	-1.60612	0.0331502	-1.29871	0.0670166	-0.307409	0.748111
Smp_122820	100.569	0.230323	0.243473	0.945992	0.344153	0.883716	hypothetical protein	1	0.820716	-0.118861	-0.701855	72.4621	-1.61102	0.00737731	-1.12552	0.0594947	-0.485496	0.490726
Smp_176360	811.576	0.186801	0.151659	1.23171	0.218057	0.759045	#N/A	1	0.793854	-0.306552	-0.487302	290.434	-1.62604	0.00180238	-1.37377	0.00808673	-0.252275	0.704172
Smp_187700	105.532	-0.0454561	0.228556	-0.198884	0.842354	0.999981	clathrin coat associated protein ap 50	1	0.89917	-0.528348	-0.370821	49.9883	-1.64407	0.00866024	-1.82448	0.00197455	0.18041	0.834593
Smp_149090	144.924	0.648777	0.200874	3.22978	0.00123887	0.0188386	hypothetical protein	1	0.837546	-0.439019	-0.398527	43.219	-1.64422	0.0533417	-1.5666	0.0574027	-0.0776212	0.951991
Smp_212740	1911.33	0.0761368	0.115947	0.656653	0.511404	0.972334	Mothers against decapentaplegic homolog	1	0.746797	-0.21738	-0.529417	344.747	-1.64766	2.17e-07	-1.22405	8.55e-05	-0.423608	0.254953
Smp_095580	4649.63	-0.264799	0.136439	-1.94079	0.0522841	0.343907	lysocardiolipin acyltransferase 1	1	0.79764	-0.34037	-0.457271	265.88	-1.64824	1.24e-08	-1.48196	1.04e-07	-0.166276	0.6676
Smp_128480	439.933	0.226555	0.150926	1.5011	0.133329	0.599178	protein Kinase C family member (pkc 2)	1	0.746873	-0.301575	-0.445298	31.2306	-1.65022	0.0255646	-1.30794	0.0693323	-0.342284	0.708556
Smp_149740	5421.08	0.110291	0.141009	0.782152	0.434125	0.941517	alzheimer's disease beta amyloid	1	0.73932	-0.253923	-0.485397	231.341	-1.65646	0.00258329	-1.2536	0.0239505	-0.402858	0.541941
Smp_144190	160.194	0.339069	0.216922	1.5631	0.11803	0.571199	leucine rich repeat containing protein 49	1	1.01271	-0.676794	-0.335914	19.6739	-1.66713	0.147024	-1.89675	0.081407	0.229613	0.878315
Smp_149530	394.234	0.356595	0.301854	1.18135	0.237464	0.784725	leucine, glutamate and lysine rich protein	1	1.04104	-0.848983	-0.192058	46.2897	-1.66846	0.0148673	-2.45167	0.000116746	0.783211	0.308098
Smp_120790	44.0469	0.715812	0.434639	1.64691	0.0995765	0.516632	hypothetical protein	1	0.834057	-0.442893	-0.391164	116.843	-1.67273	9.39e-07	-1.68535	1.26e-07	0.0126175	0.987274
Smp_204160	2029.47	-0.0351632	0.229114	-0.153474	0.878024	0.999981	aspartate ammonia ligase	1	0.679277	-0.14629	-0.532987	127.193	-1.68313	0.00149082	-1.03346	0.0536626	-0.649671	0.276086
Smp_125080	375.862	0.120844	0.160802	0.751507	0.452348	0.949389	cytosolic carboxypeptidase 1	1	0.728897	-0.17325	-0.555647	24.1734	-1.68371	0.0848761	-1.07974	0.284443	-0.603965	0.587614
Smp_150500	4428.56	-0.142533	0.163116	-0.873813	0.38222	0.912255	NMDA receptor glutamate binding chain	1	1.00205	-0.714387	-0.287659	814.5	-1.68818	5.09e-08	-2.30159	1.65e-14	0.613407	0.0746558
Smp_132210	2575.1	-0.22657	0.14275	-1.58718	0.112473	0.555386	f box only protein 32	1	0.865361	-0.46056	-0.404801	142.668	-1.69322	1.81e-07	-1.76467	7.14e-09	0.0714466	0.88723
Smp_124570	2314.02	0.38474	0.223302	1.72296	0.0848957	0.470639	hypothetical protein	1	0.613274	0.00465799	-0.617932	98.5508	-1.69502	0.000880622	-0.731393	0.177993	-0.963629	0.0743714
Smp_008710	2044.97	0.00540367	0.101647	0.0531611	0.957604	0.999981	leucine rich repeat containing protein	1	1.05138	-0.735904	-0.315471	128.166	-1.69585	0.0112961	-2.3021	0.000259804	0.606252	0.431804
Smp_180230	1687.1	0.0100564	0.12381	0.0812243	0.935264	0.999981	hypothetical protein	1	0.701287	-0.105008	-0.596279	506.55	-1.70084	5.44e-08	-1.02577	0.00120722	-0.675077	0.0478261
Smp_134530	1313.47	-0.241211	0.180304	-1.3378	0.180961	0.700455	Solute carrier organic anion transporter family	1	0.685633	-0.0798988	-0.605735	211.771	-1.70961	0.0161239	-0.875819	0.259786	-0.833786	0.277771
Smp_050830	2714.24	0.0854828	0.11251	0.759779	0.447386	0.948503	phosphatidylinositol 4,5 bisphosphate	1	0.895909	-0.527673	-0.368236	348.351	-1.70966	9.42e-11	-1.9035	5.6e-14	0.193846	0.579254
Smp_163250	366.905	0.767316	0.223447	3.434	0.00059475	0.0101651	intraflagellar transport protein 140	1	1.03893	-0.784946	-0.253983	32.1082	-1.71322	0.0174288	-2.33998	0.000446667	0.626757	0.461134
Smp_146330	1107.22	-0.112204	0.182719	-0.61408	0.539162	0.98412	1 phosphatidylinositol 4,5 bisphosphate	1	0.788269	-0.220783	-0.567486	200.415	-1.72266	0.00242397	-1.28152	0.0251331	-0.441143	0.516238
Smp_145220	825.386	0.0980578	0.138703	0.706962	0.47959	0.957	Homeobox protein ceh 18	1	0.734761	-0.241364	-0.493397	92.1237	-1.73148	0.0170523	-1.22434	0.0985005	-0.507143	0.551649
Smp_079840	2017.3	0.203131	0.133884	1.51722	0.129212	0.59024	uroporphyrinogen III synthase	1	0.77659	-0.234754	-0.541835	284.371	-1.73563	1.03e-06	-1.32958	0.000137303	-0.406055	0.337393
Smp_018790	7887.14	0.146464	0.180694	0.810565	0.417616	0.928974	hypothetical protein	1	0.843344	-0.451784	-0.391561	529.662	-1.73712	0.000479893	-1.69541	0.000524093	-0.0417086	0.959177
Smp_154950	378.303	-0.106022	0.168716	-0.628402	0.529741	0.98001	sphingosine 1 phosphate lyase 1	1	0.741731	-0.168189	-0.573542	98.7873	-1.74021	2.33e-06	-1.13502	0.00103002	-0.605189	0.149221
Smp_113520	89.3198	-0.264504	0.298396	-0.88642	0.375391	0.906783	hypothetical protein	1	0.72404	-0.0259152	-0.698125	108.722	-1.75289	0.000441526	-0.935467	0.0621288	-0.817423	0.134001
Smp_145080	1195.76	0.102007	0.137617	0.741243	0.458546	0.95055	hypothetical protein	1	0.717687	-0.115623	-0.602064	208.929	-1.76182	0.00661513	-1.00394	0.145969	-0.757883	0.288122
Smp_194080	1062.36	0.0593723	0.140534	0.422475	0.672678	0.999981	DNAj subfamily C member	1	0.862355	-0.458275	-0.40408	177.901	-1.76192	4.01e-06	-1.73128	2.31e-06	-0.0306383	0.963035
Smp_037540	7101.4	0.0511881	0.116148	0.440713	0.659421	0.999981	permease 1 heavy chain	1	0.662279	-0.0546793	-0.607599	1410.37	-1.76446	9.63e-05	-0.86076	0.0783339	-0.903704	0.061166
Smp_161680	4112.94	0.0879751	0.12498	0.703916	0.481485	0.958128	phosphorylase B kinase beta, kpbb	1	1.00597	-0.660614	-0.345355	421.504	-1.76963	4.42e-07	-2.21997	5.4e-11	0.450339	0.275628
Smp_066250	683.089	-0.0861659	0.270248	-0.31884	0.749848	0.999981	lisH domain containing protein ARMC9	1	0.992338	-0.65931	-0.333028	41.4781	-1.77263	0.0670474	-2.01439	0.0288246	0.241751	0.848652
Smp_142080	1661.56	0.270626	0.198989	1.36001	0.173828	0.687396	hypothetical protein	1	1.04936	-0.711017	-0.338348	317.558	-1.7745	4.6e-07	-2.34504	4.13e-12	0.570543	0.157951
Smp_033150	399.078	1.0668	0.172635	6.17952	6.43e-10	5.53e-08	hypothetical protein	1	1.06501	-0.749654	-0.315359	126.363	-1.77579	1.57e-07	-2.43106	2.39e-14	0.655278	0.101353
Smp_159190	1291.33	0.0460702	0.201948	0.228129	0.819546	0.999981	hypothetical protein	1	0.676094	-0.0528368	-0.623258	529.048	-1.77879	1.12e-09	-0.907709	0.00228144	-0.871081	0.00497458
Smp_013950	1146.71	-0.00509785	0.156629	-0.0325473	0.974036	0.999981	solute carrier family 43	1	0.995984	-0.714476	-0.281508	112.857	-1.7825	0.000485256	-2.27097	2.67e-06	0.488472	0.427891
Smp_122340	353.731	0.00647951	0.149159	0.0434403	0.965351	0.999981	kelch protein 18	1	0.641902	-0.0117501	-0.630152	125.22	-1.78269	2.92e-06	-0.809582	0.0342892	-0.97311	0.0162198
Smp_144030	1578.65	-0.153257	0.188728	-0.812053	0.416761	0.928974	phosphatidate cytidylyltransferase	1	0.922325	-0.54741	-0.374914	447.654	-1.79007	0.000110163	-1.90771	2.37e-05	0.117635	0.860362
Smp_104390	3184.88	0.474303	0.140951	3.36502	0.000765383	0.0126054	kin of IRRE protein 3	1	0.627525	0.116943	-0.744468	169.23	-1.79914	0.000151627	-0.580038	0.282491	-1.21911	0.0130389
Smp_027400	626.093	-0.0169124	0.154057	-0.10978	0.912584	0.999981	tyrosine protein kinase shark	1	0.779006	-0.18479	-0.594216	85.1858	-1.80589	0.00351032	-1.16454	0.0623039	-0.641349	0.36456
Smp_070000	250.597	0.00470414	0.222751	0.0211183	0.983151	0.999981	hypothetical protein	1	1.0019	-0.647886	-0.354012	68.8689	-1.81044	1.43e-05	-2.21506	1.19e-08	0.404617	0.445639
Smp_034610	107.911	0.482064	0.230634	2.09017	0.0366025	0.27007	innexin	1	1.18172	-0.588882	-0.592842	25.242	-1.81768	0.083266	-2.14684	0.0301273	0.329165	0.804836
Smp_143410	3140.09	-0.0577156	0.148208	-0.389422	0.696964	0.999981	hypothetical protein	1	0.736772	-0.110459	-0.626313	393.702	-1.844	0.00073123	-1.01099	0.0811005	-0.833014	0.161136
Smp_147050	2096.05	-0.0661328	0.205774	-0.321386	0.747918	0.999981	v type proton atpase catalytic subunit a	1	0.95268	-0.585205	-0.367475	434.252	-1.84794	0.000506366	-1.99339	0.000114369	0.145447	0.845432
Smp_167640	314.491	-0.0351395	0.161679	-0.217341	0.827943	0.999981	cytosolic carboxypeptidase 3	1	0.805253	-0.225318	-0.579935	22.8862	-1.86293	0.0503316	-1.19932	0.217423	-0.66361	0.542078
Smp_170450	1906.24	0.0949138	0.126045	0.753016	0.45144	0.949389	sodium:potassium:calcium exchanger	1	1.06228	-0.730387	-0.331896	1575.06	-1.87137	2.73e-19	-2.43149	1.18e-32	0.560122	0.0156536
Smp_044010	54814.2	-0.0516814	0.142669	-0.362248	0.717167	0.999981	tropomyosin	1	0.999991	-0.6325	-0.367491	1621.22	-1.87162	5.25e-10	-2.24334	2.86e-14	0.37172	0.301483
Smp_081650	654.473	-0.091714	0.136242	-0.673168	0.50084	0.966286	serine rich repeat protein	1	1.03295	-0.586045	-0.446904	26.9069	-1.87588	0.0469375	-1.99286	0.0266666	0.116988	0.932002
Smp_132160	371.745	-0.030476	0.22399	-0.136059	0.891774	0.999981	hypothetical protein	1	0.838575	-0.366986	-0.47159	77.2681	-1.87674	0.0270142	-1.47911	0.0832819	-0.397626	0.701374
Smp_207050	812.995	0.189417	0.119866	1.58023	0.114054	0.559876	TBC1 domain family 4	1	0.830342	-0.343496	-0.486846	245.432	-1.87967	0.000538398	-1.4772	0.00649488	-0.402468	0.544356
Smp_123640	613.142	-0.138934	0.150741	-0.921671	0.3567	0.893988	G protein coupled receptor kinase 4	1	0.807406	-0.18791	-0.619497	158.436	-1.88404	7.99e-07	-1.30285	0.000415977	-0.581192	0.185271
Smp_063640	9500.97	-0.0065065	0.113035	-0.0575617	0.954098	0.999981	g protein beta subunit	1	0.827515	-0.268286	-0.559229	2446.49	-1.88713	3.12e-07	-1.42539	0.000128421	-0.461737	0.284627
Smp_007450	7055.88	0.395305	0.15168	2.60619	0.0091557	0.0954079	heat shock protein 67b2	1	0.66647	0.158264	-0.824734	602.028	-1.89025	3.13e-06	-0.587023	0.204787	-1.30323	0.00175232
Smp_106060	2443.58	0.0933209	0.135632	0.688043	0.491426	0.961947	calcium binding mitochondrial carrier protein	1	1.04028	-0.57583	-0.464448	258.385	-1.89441	6.99e-10	-2.1805	9.49e-14	0.286095	0.467578
Smp_052730	263.903	0.773737	0.168464	4.59289	4.37e-06	0.000147962	sperm associated antigen 1	1	1.18554	-0.832504	-0.353037	36.8026	-1.89481	0.00117521	-2.64155	1.21e-06	0.746734	0.285971
Smp_158190	1027.64	0.534854	0.138145	3.87168	0.000108089	0.00238267	transmembrane protein 184b	1	1.04473	-0.288234	-0.7565	96.989	-1.89597	0.00648091	-1.6742	0.0139045	-0.221771	0.813379
Smp_147140	843.326	-0.218944	0.182648	-1.19872	0.230637	0.777647	transient receptor potential cation channel	1	1.08401	-0.613327	-0.470684	27.6721	-1.90279	0.0301335	-2.0884	0.0112994	0.185605	0.879697
Smp_021290	4143.13	0.159633	0.184116	0.867024	0.385929	0.915264	arf GAP domain and FG repeats containing protein	1	0.894679	-0.351083	-0.543596	214.865	-1.90785	0.000131347	-1.61586	0.00104457	-0.291984	0.647029
Smp_165990	1147.53	0.0998559	0.155088	0.643867	0.519662	0.975231	G protein signaling modulator 1	1	0.953244	-0.454231	-0.499013	108.898	-1.92035	0.00470249	-1.80026	0.00653027	-0.120088	0.903202
Smp_214050	474.193	0.0529777	0.167297	0.316668	0.751495	0.999981	hypothetical protein	1	0.803977	-0.150105	-0.653872	377.348	-1.92955	1.58e-07	-1.20902	0.000991903	-0.720523	0.0768683
Smp_103530	3157.26	0.0779493	0.131597	0.592335	0.553627	0.985603	high mobility group protein dsp1	1	0.854028	-0.295104	-0.558924	253.189	-1.93729	1.39e-05	-1.49151	0.000770886	-0.445784	0.407105
Smp_154560	676.138	0.0941919	0.1245	0.756561	0.449313	0.948611	multiple pdz domain protein	1	0.716295	-0.0596356	-0.65666	50.949	-1.93767	0.00308588	-0.952917	0.158181	-0.984755	0.164194
Smp_026440	98.5224	0.541568	0.29038	1.86503	0.0621767	0.384936	dpy 30 protein	1	1.16457	-0.844339	-0.320232	38.7715	-1.93877	0.000223927	-2.6427	7.17e-08	0.703925	0.268042
Smp_198730	300.899	0.891984	0.190855	4.67362	2.96e-06	0.000106449	hypothetical protein	1	0.94351	-0.461371	-0.482139	55.749	-1.94015	0.0614319	-1.65581	0.110932	-0.284333	0.832513
Smp_127830	1414.07	0.143005	0.108646	1.31625	0.188092	0.715181	actin protein ARP2:3 complex subunit	1	0.721275	-0.0316039	-0.689671	255.484	-1.94446	0.000183304	-0.919414	0.0997745	-1.02504	0.0640587
Smp_144780	419.892	-0.0677334	0.183457	-0.369205	0.711975	0.999981	hypothetical protein	1	0.764189	-0.0012712	-0.762917	38.1278	-1.95101	0.0552684	-0.829535	0.471373	-1.12147	0.297612
Smp_033870	6077.35	-0.118427	0.198661	-0.596125	0.551092	0.985603	hypothetical protein	1	0.668693	0.0587145	-0.727407	301.391	-1.95871	2.01e-09	-0.743116	0.0291799	-1.2156	0.000326648
Smp_137840	769.735	0.0937984	0.211521	0.443448	0.657442	0.999981	hypothetical protein	1	0.843265	-0.23531	-0.607956	142.264	-1.95873	5.95e-07	-1.38376	0.000259609	-0.574973	0.2045
Smp_042300	4577.73	-0.0346224	0.185358	-0.186787	0.851828	0.999981	PUR alpha protein	1	0.965346	-0.465616	-0.49973	1907.73	-1.96703	4.51e-07	-1.88792	9.55e-07	-0.0791098	0.893603
Smp_068350	695.204	0.621024	0.216955	2.86246	0.0042037	0.0510519	meiosis specific nuclear structural protein 1	1	0.912163	-0.398768	-0.513394	42.5347	-1.96914	0.0430336	-1.57086	0.107882	-0.398277	0.740669
Smp_154580	1891.66	-0.037446	0.159906	-0.234175	0.814849	0.999981	Rab3	1	0.907656	-0.253148	-0.654509	116.94	-1.97052	0.000401686	-1.44274	0.00863905	-0.527774	0.425823
Smp_040720	1902.37	0.0610217	0.214375	0.284649	0.775913	0.999981	hypothetical protein	1	0.7579	0.00281644	-0.760717	126.861	-1.98496	2.91e-08	-0.920741	0.00793822	-1.06422	0.005115
Smp_126620	1218.17	0.113664	0.191664	0.59304	0.553155	0.985603	hypothetical protein	1	1.08366	-0.424494	-0.659164	206.985	-1.98571	0.000538343	-1.96834	0.000438628	-0.0173728	0.989589
Smp_025620	1476.37	0.789078	0.182242	4.32984	1.49e-05	0.000426179	coiled coil domain containing protein 151	1	1.14506	-0.723739	-0.421325	77.6959	-1.98583	0.000268616	-2.47793	1.61e-06	0.492097	0.461348
Smp_158630	1465.82	0.0497658	0.123286	0.403661	0.686462	0.999981	cement protein 3B variant 1	1	0.661945	0.169303	-0.831247	568.5	-1.98987	3.21e-11	-0.552852	0.0966901	-1.43702	2.38e-06
Smp_171010	422.191	1.20121	0.144009	8.3412	7.35e-17	1.47e-14	EF hand domain (C terminal) containing 2	1	1.20469	-0.844544	-0.360151	74.1905	-2.00537	0.00131814	-2.67421	5.98e-06	0.668838	0.364161
Smp_123000	3248.37	-0.146738	0.206234	-0.711513	0.476766	0.95665	ski oncogene	1	0.960303	-0.271905	-0.688398	63.5778	-2.00621	0.00406547	-1.55421	0.0235755	-0.452001	0.597436
Smp_169210	1089.52	0.196279	0.175333	1.11947	0.262942	0.813644	protein regulator of cytokinesis 1	1	0.997505	-0.533057	-0.464447	56.3797	-2.01323	0.000105421	-2.04495	2.49e-05	0.0317216	0.97335
Smp_065610	32676.5	-0.047101	0.13171	-0.35761	0.720635	0.999981	pyruvate kinase isozymes M1:M2	1	0.73965	-0.0108547	-0.728795	6832.81	-2.01498	4.09e-11	-0.94139	0.00352004	-1.07359	0.000759787
Smp_173190	623.906	-0.16022	0.182717	-0.876875	0.380555	0.910643	calcium dependent secretion activator 1	1	0.945573	-0.28346	-0.662113	47.6778	-2.01724	0.0534084	-1.45077	0.174448	-0.56647	0.644397
Smp_165060	577.355	0.716804	0.148707	4.82023	1.43e-06	5.68e-05	hypothetical protein	1	0.978818	-0.309091	-0.669727	38.985	-2.01752	0.00395022	-1.64186	0.0141368	-0.375658	0.670388
Smp_156300	743.672	0.617538	0.11941	5.17156	2.32e-07	1.11e-05	WD repeat containing protein 90	1	0.95594	-0.47599	-0.47995	51.8175	-2.01854	0.00329426	-1.8118	0.00585346	-0.206734	0.828529
Smp_050630	3249.01	-0.131348	0.118445	-1.10894	0.267458	0.815382	extended synaptotagmin protein 2a	1	1.0721	-0.641866	-0.43023	190.479	-2.03669	1.07e-08	-2.33373	6.82e-12	0.297039	0.519227
Smp_103560	1035.58	-0.364616	0.210179	-1.73479	0.0827783	0.463918	hypoxanthine-guanine phosphoribosyltransferase	1	0.665442	0.0991433	-0.764585	330.847	-2.03699	4.11e-06	-0.65194	0.18917	-1.38505	0.00237514
Smp_142390	187.966	-0.259093	0.190296	-1.36152	0.173349	0.686764	innexin unc 9	1	1.23605	-0.847357	-0.388694	32.0845	-2.04314	0.00798044	-2.66041	0.000214307	0.617273	0.509195
Smp_212380	430.176	-0.352078	0.228055	-1.54383	0.12263	0.578623	ubiquitin specific peptidase 2 (C19 family)	1	0.991769	-0.498735	-0.493034	64.5812	-2.0477	0.000167966	-1.97748	0.000112415	-0.0702181	0.935171
Smp_007290	146.259	-0.0477855	0.222062	-0.21519	0.829619	0.999981	hypothetical protein	1	0.866159	-0.190613	-0.675546	41.4897	-2.0619	0.000191511	-1.31438	0.0112971	-0.747516	0.237488
Smp_166090	535.215	0.388815	0.194585	1.99818	0.045697	0.313783	coiled coil domain containing protein 112	1	1.19479	-0.798145	-0.39664	35.2164	-2.06305	0.00887609	-2.54649	0.000582399	0.483446	0.621347
Smp_020270	1776.49	-0.0589023	0.159887	-0.368398	0.712576	0.999981	high voltage-activated calcium channel Cav1	1	1.03154	-0.463748	-0.567792	21.3925	-2.06365	0.0189143	-1.91048	0.0218925	-0.153167	0.903616
Smp_203410	174.317	0.144641	0.176014	0.821757	0.411215	0.923757	hypothetical protein	1	0.823704	-0.0702912	-0.753413	53.2075	-2.06896	2.98e-05	-1.10724	0.0171704	-0.961718	0.0775439
Smp_131700	1934.47	0.0727773	0.169211	0.430097	0.667125	0.999981	protein kinase c epsilon type	1	0.970006	-0.25703	-0.712976	109.106	-2.07051	0.00101377	-1.52888	0.0144735	-0.541628	0.470766
Smp_155850	1495.44	-0.231482	0.357283	-0.647895	0.517053	0.975068	heterogeneous nuclear ribonucleoprotein	1	1.14513	-0.755264	-0.389864	36.1755	-2.08896	0.00943721	-2.38332	0.00167952	0.294362	0.783488
Smp_133140	444.953	0.550628	0.13959	3.94461	7.99e-05	0.00184719	centrosomal protein of 104 kDa	1	0.910477	-0.0495883	-0.860888	42.6804	-2.09603	0.00469362	-1.14101	0.134392	-0.955018	0.240713
Smp_127730	1045.2	0.236195	0.149427	1.58067	0.113954	0.559876	ATP citrate synthase	1	0.750996	0.0846274	-0.835624	141.953	-2.09675	0.00121592	-0.761471	0.301276	-1.33528	0.0477183
Smp_160860	216.352	0.386617	0.164902	2.34452	0.0190518	0.167331	tetratricopeptide repeat protein 8	1	0.842909	-0.0768224	-0.766087	40.4058	-2.10045	2.69e-05	-1.17219	0.0112994	-0.928258	0.0943601
Smp_133800	88.8991	0.603288	0.239764	2.51617	0.0118637	0.117774	hypothetical protein	1	1.03964	-0.33124	-0.708405	24.8334	-2.10067	0.00347751	-1.73499	0.0104059	-0.365682	0.691079
Smp_019950	2403.97	-0.455428	0.148435	-3.0682	0.00215352	0.0294338	protein phosphatase 1 inhibitor potentiated by	1	0.972236	-0.332501	-0.639736	241.563	-2.10314	3.84e-09	-1.73979	4.69e-07	-0.363348	0.41353
Smp_010770	2340.05	-0.181354	0.151738	-1.19518	0.232018	0.779773	elongation of very long chain fatty acids	1	0.799702	-0.119766	-0.679935	434.321	-2.10612	6.53e-06	-1.15033	0.0180552	-0.955788	0.0583059
Smp_123030	1574.21	0.228555	0.138523	1.64993	0.0989564	0.514346	arf GAP with dual PH domain containing protein	1	1.07495	-0.630116	-0.444834	88.8513	-2.10688	0.00261	-2.17046	0.00119683	0.0635793	0.955245
Smp_169080	41.7974	0.716826	0.318084	2.25358	0.0242229	0.198526	hypothetical protein	1	1.00076	-0.245628	-0.755137	26.301	-2.11897	0.0222402	-1.5153	0.0997297	-0.60368	0.58324
Smp_173960	738.982	0.164833	0.203341	0.810621	0.417583	0.928974	AMP deaminase 2	1	1.11227	-0.661282	-0.450988	72.1814	-2.12502	0.000771318	-2.28541	0.000150974	0.160383	0.860349
Smp_166280	202.733	0.101016	0.193817	0.521193	0.602232	0.996125	glutaminyl cyclase (M28 family)	1	0.74033	0.156271	-0.896602	77.789	-2.12909	0.000116701	-0.703011	0.244542	-1.42608	0.0129121
Smp_154500	463.929	0.00112341	0.27003	0.0041603	0.996681	0.999981	hypothetical protein	1	1.1882	-0.68714	-0.501057	77.1215	-2.13516	0.000107524	-2.47123	2.1e-06	0.336077	0.642413
Smp_137950	812.648	0.66846	0.146907	4.55024	5.36e-06	0.000176505	leucine rich repeat containing protein 56	1	1.09015	-0.491101	-0.599051	89.1292	-2.14166	0.00108957	-2.03059	0.00140757	-0.111069	0.909061
Smp_120380	491.485	0.589301	0.161052	3.65908	0.000253124	0.00494569	leucine rich repeat containing protein 6	1	1.08412	-0.582123	-0.502	33.9548	-2.15465	0.00255136	-2.13054	0.00152727	-0.0241166	0.988174
Smp_004120	1342.26	-0.108917	0.183389	-0.593912	0.552571	0.985603	AMP deaminase 2	1	1.08177	-0.491738	-0.590036	224.843	-2.1726	6.37e-06	-2.05509	1.25e-05	-0.117505	0.869216
Smp_004070	56.3942	-0.224291	0.287076	-0.781295	0.434629	0.941694	carbonic anhydrase	1	1.1274	-0.582557	-0.544844	64.2644	-2.17344	3.74e-05	-2.22791	6.71e-06	0.0544628	0.951052
Smp_160780	578.215	-0.0460091	0.167769	-0.274242	0.783899	0.999981	potassium voltage gated channel protein	1	1.2242	-0.832773	-0.391423	36.2772	-2.1912	0.00170424	-2.67423	4.47e-05	0.483025	0.586365
Smp_036010	488.485	-0.120389	0.137735	-0.874066	0.382082	0.91218	magnesium transporter nipa2	1	1.09032	-0.614166	-0.476156	87.0066	-2.20116	0.000488837	-2.21788	0.000242753	0.0167208	0.992434
Smp_154970	1491.74	-0.189456	0.211111	-0.897421	0.369494	0.901823	hypothetical protein	1	1.20691	-0.78215	-0.424761	675.819	-2.21578	2.62e-05	-2.61583	3.36e-07	0.400053	0.541941
Smp_177190	708.983	0.213911	0.188193	1.13666	0.25568	0.805453	protein regulator of cytokinesis 1	1	0.920617	-0.240669	-0.679948	68.6961	-2.21689	0.000126998	-1.49644	0.00810213	-0.720451	0.280214
Smp_167820	277.375	-0.0358622	0.186319	-0.192477	0.847368	0.999981	solute carrier family 12 k cl cotransporter	1	1.10353	-0.397095	-0.706437	25.0818	-2.21927	0.000612198	-1.92326	0.000787314	-0.29601	0.738727
Smp_168710	334.706	0.720937	0.154123	4.67768	2.9e-06	0.000104803	hypothetical protein	1	1.21926	-0.796975	-0.422282	49.9497	-2.22071	0.00172919	-2.57793	0.000123604	0.357222	0.697816
Smp_143440	539.169	-0.240164	0.162427	-1.4786	0.139248	0.611396	hypothetical protein	1	0.757666	0.118869	-0.876535	149.021	-2.2208	1.13e-07	-0.762555	0.0773886	-1.45824	0.000763014
Smp_057320	3300.38	-0.0710308	0.179459	-0.395804	0.69225	0.999981	vesicle fusing ATPase 1	1	1.20621	-0.736591	-0.469614	784.417	-2.22472	0.000220972	-2.49582	2.08e-05	0.271095	0.732732
Smp_158770	1066.11	0.854538	0.125366	6.81633	9.34e-12	1.06e-09	calcyphosin 2	1	1.28598	-0.761989	-0.52399	151.842	-2.22512	1.44e-07	-2.7484	1.23e-11	0.523282	0.30725
Smp_181440	113.071	0.150709	0.251169	0.60003	0.548486	0.985603	protein tyrosine phosphatase domain containing protein	1	1.03378	-0.230026	-0.803755	34.4491	-2.24683	0.000733174	-1.59121	0.0128266	-0.65562	0.406946
Smp_161330	229.845	0.145422	0.180853	0.804087	0.421347	0.932866	PIH1 domain containing protein 2	1	1.27599	-0.878212	-0.39778	81.4808	-2.2554	0.00273263	-2.70153	0.00015976	0.446131	0.637744
Smp_194710	208.181	-0.0431402	0.180626	-0.238838	0.811231	0.999981	potassium voltage gated channel protein Shaker	1	1.19446	-0.54521	-0.649254	29.9796	-2.26359	0.0491727	-1.98105	0.080559	-0.282544	0.853252
Smp_174760	228.608	0.715757	0.19232	3.72169	0.000197892	0.00399361	WD repeat containing protein 27	1	1.11668	-0.488588	-0.628094	36.9946	-2.26676	0.000876125	-2.03911	0.00153709	-0.22765	0.81094
Smp_174780	236.253	0.816311	0.255895	3.19003	0.00142259	0.0210137	rab protein 5	1	0.85844	0.00596941	-0.86441	85.7697	-2.26786	0.000187105	-1.01902	0.0991539	-1.24885	0.0534825
Smp_158480	315.862	-0.62592	0.438597	-1.4271	0.153552	0.643317	AMP dependent ligase	1	1.30715	-0.763168	-0.543985	82.8565	-2.27008	0.0253509	-2.42705	0.0133637	0.156972	0.913546
Smp_147040	158.293	0.26485	0.201538	1.31414	0.188799	0.715339	glutaminase	1	0.975953	-0.214188	-0.761764	84.0361	-2.27463	0.0104039	-1.39968	0.131544	-0.874955	0.381927
Smp_019900	3746.02	-0.0126621	0.127972	-0.0989441	0.921183	0.999981	Fasciculation and elongation protein zeta 2	1	0.898677	-0.206296	-0.692381	851.55	-2.27803	6.08e-08	-1.42713	0.000884719	-0.8509	0.0653687
Smp_085080	846.605	-0.157449	0.150144	-1.04865	0.294337	0.841744	hypothetical protein	1	0.949805	-0.192483	-0.757322	467.567	-2.28189	1.21e-10	-1.48293	2.31e-05	-0.798958	0.0410922
Smp_163450	94.443	0.921662	0.242849	3.79521	0.000147519	0.00313142	tubulin polyglutamylase ttll4	1	1.09988	-0.408604	-0.691278	17.959	-2.28346	0.0192512	-1.80406	0.0557685	-0.479406	0.691326
Smp_148870	986.229	0.139311	0.168331	0.827601	0.407897	0.922302	hypothetical protein	1	0.917405	-0.150418	-0.766987	104.444	-2.28493	0.0105272	-1.2507	0.191366	-1.03423	0.289886
Smp_125900	2306.82	0.41336	0.126862	3.25835	0.00112062	0.0173584	protein scai	1	0.74901	0.146016	-0.895026	511.419	-2.28793	9.66e-07	-0.71082	0.182312	-1.57711	0.00100512
Smp_167910	94.8855	0.660806	0.208173	3.1743	0.00150197	0.0219973	hypothetical protein	1	1.33484	-0.683625	-0.651217	21.4142	-2.30077	0.00380071	-2.51945	0.000620426	0.218679	0.847396
Smp_060570	1439.61	-0.149062	0.149438	-0.997484	0.31853	0.863879	hypothetical protein	1	1.16038	-0.593994	-0.566387	230.895	-2.30122	2.55e-11	-2.35383	1.18e-12	0.0526136	0.925963
Smp_138750	793.957	0.545912	0.251937	2.16686	0.0302454	0.235179	alpha fucosyltransferase m	1	1.02092	-0.332206	-0.68871	125.683	-2.30163	2.49e-07	-1.76663	3.97e-05	-0.534999	0.315751
Smp_161430	854.192	0.0680988	0.144502	0.471266	0.637451	0.999328	Monocarboxylate transporter 12	1	0.99434	-0.0942497	-0.90009	62.1149	-2.31404	0.00065445	-1.33983	0.050134	-0.974208	0.195231
Smp_172070	2705.27	-0.0284911	0.147505	-0.193153	0.846839	0.999981	hypothetical protein	1	1.15489	-0.509905	-0.64499	654.614	-2.31631	1.23e-06	-2.1547	4.75e-06	-0.161602	0.812097
Smp_087560	2339.04	0.466587	0.194548	2.39831	0.0164708	0.151996	coiled coil domain containing protein 65	1	1.13262	-0.568658	-0.563961	133.648	-2.31955	0.000903031	-2.21018	0.00122308	-0.109372	0.917146
Smp_197690	358.61	0.107031	0.191547	0.558772	0.576317	0.990953	BTB,domain containing protein	1	1.1844	-0.618262	-0.566133	65.5601	-2.33223	0.00675165	-2.19932	0.00865964	-0.132906	0.916427
Smp_130080	218.725	0.360469	0.189977	1.89744	0.0577705	0.366474	ankyrin repeat domain containing protein 45	1	0.896643	-0.0997675	-0.796875	153.22	-2.34093	2.02e-09	-1.277	0.000766978	-1.06393	0.0114683
Smp_161360	1319.51	0.163531	0.138795	1.17822	0.238709	0.7871	syndecan	1	1.21321	-0.519453	-0.693759	116.651	-2.34556	2.1e-06	-2.29799	1.14e-06	-0.0475676	0.954798
Smp_012780	6014.3	-0.11371	0.154761	-0.734742	0.462497	0.952792	sterile alpha and tir motif containing protein	1	1.19806	-0.705808	-0.492248	160.104	-2.34919	0.00237814	-2.39604	0.00147989	0.046855	0.972121
Smp_059090	747.782	0.734856	0.20483	3.58764	0.000333685	0.00629047	ropporin 1 protein	1	0.831557	0.0613618	-0.892919	82.9958	-2.3498	0.00118423	-0.907208	0.256493	-1.44259	0.0573615
Smp_126510	746.979	-0.113707	0.203343	-0.559186	0.576035	0.990953	hypothetical protein	1	1.32357	-0.855238	-0.468333	41.0541	-2.35109	0.00573218	-2.71109	0.000776413	0.359995	0.746499
Smp_180590	29.9759	1.18622	0.367924	3.22409	0.00126375	0.0191613	normocyte binding protein 1	1	1.06205	-0.294042	-0.768006	19.9946	-2.36536	0.00572769	-1.64364	0.0447603	-0.721724	0.474739
Smp_083480	264.681	-0.0685617	0.153874	-0.44557	0.655908	0.999981	hypothetical protein	1	0.828331	0.140124	-0.968455	163.193	-2.36928	4.12e-12	-0.848597	0.0102735	-1.52068	1.64e-05
Smp_140940	1878.97	0.287177	0.145452	1.97438	0.0483384	0.326036	hypothetical protein	1	1.11711	-0.434475	-0.682633	70.27	-2.37689	3.74e-06	-2.01873	2.7e-05	-0.358158	0.592508
Smp_026820	356.572	1.49461	0.232356	6.43242	1.26e-10	1.24e-08	Centrosomal protein of 135 kDa (Cep135 protein)	1	1.04208	-0.293697	-0.748379	49.3994	-2.3821	0.00216094	-1.67989	0.0290266	-0.702211	0.442969
Smp_134070	223.249	0.176124	0.202609	0.869283	0.384693	0.914675	sodium:myo inositol cotransporter	1	0.919117	-0.0921343	-0.826982	83.5912	-2.38473	1.78e-06	-1.29874	0.00719675	-1.08599	0.0456691
Smp_135930	295.086	0.651547	0.202271	3.22116	0.00127672	0.0192447	zinc finger MYND domain containing protein	1	1.27318	-0.63461	-0.638571	85.0116	-2.38616	6.77e-07	-2.50039	3.33e-08	0.114233	0.877243
Smp_130950	4845.78	-0.00448588	0.218482	-0.020532	0.983619	0.999981	DNA double strand break repair rad50 ATPase	1	0.813706	0.0791012	-0.892807	1687.74	-2.39859	1.69e-13	-0.91193	0.00861548	-1.48666	8.65e-06
Smp_060480	1297.72	0.00369015	0.138868	0.026573	0.9788	0.999981	copine 9	1	1.02432	-0.281407	-0.742912	322.226	-2.39906	1.89e-14	-1.73099	1.15e-08	-0.668067	0.0594889
Smp_016730	67.163	0.395462	0.236883	1.66944	0.0950306	0.504831	heme binding protein 2	1	0.784979	0.170161	-0.95514	55.0459	-2.40153	5.24e-07	-0.742882	0.0976894	-1.65865	0.000831255
Smp_144360	866.906	0.003369	0.137268	0.0245432	0.980419	0.999981	myelin proteolipid	1	0.847346	0.106621	-0.953967	417.219	-2.40491	3.19e-16	-0.918372	0.0020633	-1.48654	9.26e-07
Smp_121190	2054.89	-0.186217	0.121348	-1.53457	0.12489	0.583481	voltage gated potassium channel	1	1.14688	-0.554793	-0.59209	68.9369	-2.40603	0.00173649	-2.17388	0.00372662	-0.23215	0.828113
Smp_174340	40.7858	-0.158994	0.331563	-0.479528	0.631563	0.998048	frizzled 9	1	1.3429	-0.726136	-0.616768	18.0727	-2.40725	0.0116205	-2.52565	0.00491233	0.118396	0.934942
Smp_002740	1224.29	0.145671	0.225519	0.645935	0.518322	0.975212	hypothetical protein	1	0.918643	-0.0876615	-0.830982	983.086	-2.41428	1.07e-08	-1.28834	0.00317703	-1.12594	0.0124331
Smp_171450	567.373	0.0518956	0.157975	0.328505	0.74253	0.999981	E3 ubiquitin protein ligase mib1	1	1.38817	-0.659128	-0.729046	40.3863	-2.44671	0.0035949	-2.57514	0.00126612	0.128426	0.919651
Smp_088940	2031.74	0.530105	0.119296	4.44363	8.85e-06	0.000272026	protein FAM164A	1	1.042	-0.274643	-0.767356	186.188	-2.44716	9.07e-05	-1.67849	0.00808828	-0.768667	0.283936
Smp_144880	504.451	0.33883	0.152527	2.22145	0.0263208	0.212557	irregular chiasm C roughest protein	1	0.793071	0.223826	-1.0169	66.6151	-2.44954	8.38e-05	-0.642278	0.356882	-1.80727	0.00470368
Smp_150030	222.398	-0.0763187	0.196137	-0.389109	0.697195	0.999981	hypothetical protein	1	1.09863	-0.328973	-0.769652	62.0046	-2.45963	4.16e-05	-1.87132	0.00116368	-0.588305	0.419968
Smp_171460	408.916	0.288709	0.165068	1.74903	0.0802852	0.455274	neural cell adhesion molecule	1	0.840614	0.134932	-0.975546	49.1527	-2.47193	6.37e-06	-0.894481	0.0772332	-1.57745	0.00616212
Smp_171440	528.736	0.181118	0.230521	0.78569	0.432049	0.941245	mind bomb	1	1.34356	-0.53862	-0.804945	32.9327	-2.47441	0.0348843	-2.13215	0.0656532	-0.34226	0.82505
Smp_127000	1686.62	-0.153426	0.185157	-0.828627	0.407316	0.922302	Large neutral amino acids transporter small	1	1.03213	-0.32639	-0.705738	113.255	-2.47509	7.6e-05	-1.74711	0.00510073	-0.727983	0.316824
Smp_212280	181.409	0.910465	0.211339	4.30808	1.65e-05	0.000467237	dynein heavy chain	1	1.28449	-0.640266	-0.644226	27.6852	-2.49264	0.00104552	-2.47761	0.000493401	-0.0150283	0.996074
Smp_128170	4038.54	0.112314	0.104859	1.0711	0.284123	0.831974	hypothetical protein	1	1.25051	-0.71269	-0.537825	738.489	-2.50638	3.96e-11	-2.64098	1.31e-12	0.134596	0.80677
Smp_177010	53.1654	1.01946	0.383241	2.66009	0.00781195	0.0839492	serine:threonine:tyrosine interacting	1	1.3947	-0.741554	-0.653141	29.9382	-2.50749	0.000591852	-2.78401	4.13e-05	0.276522	0.788384
Smp_178100	495.174	0.410793	0.211886	1.93875	0.0525324	0.345276	EF hand calcium binding domain containing protein	1	1.16047	-0.407793	-0.75268	119.464	-2.50857	2.19e-07	-2.0548	7.88e-06	-0.453762	0.45396
Smp_168590	2233.24	1.19256	0.121041	9.85253	6.68e-23	1.98e-20	Pema SRCR protein	1	0.973886	-0.110875	-0.86301	398.824	-2.51762	2.12e-14	-1.4004	2e-05	-1.11722	0.00146148
Smp_131870	3105.01	0.079309	0.160768	0.493312	0.621792	0.996858	syntaxin binding protein 1	1	1.18161	-0.447017	-0.734593	544.253	-2.53018	1.61e-10	-2.14376	3.83e-08	-0.38642	0.433881
Smp_144660	332.635	0.269762	0.151601	1.77942	0.0751712	0.436358	EF hand domain containing family member B	1	0.989829	-0.1036	-0.886229	86.0002	-2.53437	4.42e-05	-1.39992	0.0256975	-1.13445	0.0942215
Smp_024520	2300.64	0.03509	0.129178	0.27164	0.785899	0.999981	rab GDP dissociation inhibitor beta	1	1.20371	-0.619045	-0.584669	736.615	-2.54249	1.56e-15	-2.47158	2.58e-15	-0.0709167	0.88723
Smp_106010	282.495	-0.143041	0.192415	-0.743397	0.457241	0.95055	hypothetical protein	1	1.37104	-0.75704	-0.614002	547.986	-2.54538	7.09e-09	-2.86095	2.39e-11	0.315571	0.581258
Smp_134450	352.573	0.563266	0.177936	3.16556	0.00154787	0.0225926	hypothetical protein	1	1.31863	-0.590567	-0.728059	40.823	-2.57742	0.00012486	-2.46015	7.96e-05	-0.117272	0.910274
Smp_067580	2263.46	-0.0907854	0.152998	-0.593378	0.552928	0.985603	coiled coil domain containing protein 109A	1	1.12805	-0.391629	-0.736418	369.617	-2.57959	1.84e-17	-2.04314	2.92e-12	-0.536452	0.131639
Smp_142140	406.29	0.757163	0.152695	4.95865	7.1e-07	3.02e-05	hypothetical protein	1	1.08885	-0.0930175	-0.995834	150.848	-2.58735	2.9e-08	-1.53977	0.00080476	-1.04758	0.0397656
Smp_141360	1455.66	-0.0290464	0.162242	-0.179032	0.857913	0.999981	pyruvate carboxylase, mitochondrial	1	1.06167	-0.207668	-0.854003	175.851	-2.58873	8.25e-10	-1.64405	5.64e-05	-0.944685	0.042566
Smp_212800	100.627	0.337395	0.232368	1.45198	0.146506	0.628813	tetratricopeptide repeat protein 8, tpr8, putative	1	0.893178	0.258062	-1.15124	27.8176	-2.59429	8.41e-06	-0.764989	0.142524	-1.8293	0.00252438
Smp_075130	1716.95	0.185483	0.153849	1.20562	0.227966	0.7728	guanine nucleotide binding protein subunit	1	1.27636	-0.688251	-0.588106	770.171	-2.59681	1.57e-09	-2.6419	3.68e-10	0.0450897	0.950783
Smp_196010	3149.67	0.105753	0.0987342	1.07109	0.284131	0.831974	stomatin (EPB72) 1	1	1.09829	-0.309203	-0.78909	371.115	-2.60766	1.59e-10	-1.84536	4.91e-06	-0.762301	0.0980075
Smp_036180	1683.64	-0.0111947	0.152868	-0.073231	0.941622	0.999981	Diacylglycerol kinase theta	1	0.99329	-0.0741044	-0.919186	200.972	-2.60894	1.14e-05	-1.32815	0.0321701	-1.28079	0.0444647
Smp_016630	877.529	0.162384	0.161918	1.00288	0.315919	0.861662	trimeric G protein alpha o subunit	1	1.08539	-0.179043	-0.90635	171.437	-2.61184	6.33e-05	-1.57797	0.0184827	-1.03386	0.152903
Smp_034920	239.226	0.769794	0.226762	3.39473	0.000686969	0.0114222	dynein heavy chain	1	1.28524	-0.541728	-0.743514	25.8988	-2.61697	0.00637719	-2.17612	0.0183373	-0.440852	0.719416
Smp_156850	723.09	-0.0762059	0.217526	-0.35033	0.726091	0.999981	hypothetical protein	1	1.05696	-0.173818	-0.883145	100.787	-2.61768	1.59e-10	-1.62522	1.89e-05	-0.99246	0.0285606
Smp_090980	250.277	0.363675	0.249427	1.45804	0.144829	0.624732	cyclin dependent kinase 20	1	1.31559	-0.705033	-0.610553	121.502	-2.61829	0.000225652	-2.60079	0.000135993	-0.017499	0.993424
Smp_078040	4307.85	0.452733	0.198143	2.28489	0.0223195	0.188155	tubulin subunit beta	1	1.09228	-0.200334	-0.891949	1495.78	-2.62175	1.2e-08	-1.67374	0.000354038	-0.948009	0.0609028
Smp_198620	350.952	0.1256	0.234709	0.535129	0.592561	0.994002	multiple pdz domain protein	1	1.31863	-0.590567	-0.728059	22.9943	-2.62729	0.00173903	-2.38328	0.00234172	-0.244009	0.837209
Smp_012670	260.092	0.65289	0.171569	3.80541	0.000141568	0.00301251	hypothetical protein	1	1.27761	-0.618304	-0.659306	103.158	-2.63922	1.77e-08	-2.51947	7.66e-09	-0.119753	0.868461
Smp_010230	1241.16	-0.0611966	0.161981	-0.377801	0.705578	0.999981	guanine nucleotide binding protein beta 1 4	1	1.13563	-0.291081	-0.844546	133.575	-2.64151	2.5e-10	-1.86267	2.04e-06	-0.778838	0.103262
Smp_134050	596.29	0.295766	0.173852	1.70125	0.0888966	0.484319	voltage dependent calcium channel subunit	1	1.14864	-0.251625	-0.897015	222.259	-2.65344	0.000678363	-1.74327	0.0300774	-0.910164	0.304585
Smp_139760	1078.02	0.0574787	0.137275	0.418711	0.675427	0.999981	Kinesin Light Chain family member (klc 2)	1	1.03551	-0.0643409	-0.971169	26.7008	-2.66283	4.63e-06	-1.4041	0.00435175	-1.25873	0.0494691
Smp_160130	137.469	0.598599	0.19821	3.02002	0.0025276	0.033311	cell wall surface anchor family protein	1	1.20474	-0.344975	-0.859761	65.3103	-2.66962	0.000132066	-1.94052	0.0043854	-0.729103	0.379654
Smp_163070	326.499	0.684938	0.157914	4.33741	1.44e-05	0.000417328	coiled coil domain containing protein 108	1	1.28816	-0.232378	-1.05578	32.2509	-2.66966	0.000882926	-1.88669	0.0139029	-0.782964	0.412264
Smp_123870	3021.73	0.270421	0.155407	1.74008	0.0818451	0.459884	vesicle associated membrane protein	1	1.25049	-0.48095	-0.769539	767.591	-2.67418	5.66e-12	-2.30771	1.5e-09	-0.366462	0.454502
Smp_171520	1900.77	-0.274562	0.133817	-2.05177	0.0401916	0.287205	hypothetical protein	1	1.1835	-0.44876	-0.734741	797.649	-2.67493	2.21e-18	-2.19192	3.58e-13	-0.483018	0.183367
Smp_172140	641.121	0.972027	0.20935	4.64307	3.43e-06	0.000120698	coiled coil domain containing protein 19	1	1.29836	-0.6472	-0.65116	53.3076	-2.67522	0.000914988	-2.46196	0.00156325	-0.213261	0.85281
Smp_050640	1327.75	-0.0818865	0.172684	-0.474199	0.635358	0.998794	glut4 vesicle protein	1	1.19188	-0.449385	-0.742497	141.117	-2.6843	1.93e-11	-2.19673	4.99e-09	-0.487575	0.321963
Smp_054620	165.848	0.667955	0.208411	3.20498	0.00135071	0.0201949	amyotrophic lateral sclerosis 2	1	1.28926	-0.619025	-0.670238	50.6337	-2.70368	0.000546951	-2.43009	0.00118347	-0.273593	0.800502
Smp_166420	365.879	0.929171	0.162254	5.72666	1.02e-08	6.58e-07	tetratricopeptide repeat protein 30A	1	1.02259	-0.0776675	-0.944926	150.376	-2.70379	0.000685333	-1.34244	0.116599	-1.36135	0.11099
Smp_127640	163.369	0.727683	0.234797	3.0992	0.00194045	0.0270373	hypothetical protein	1	1.21878	-0.323416	-0.895361	27.516	-2.70754	0.000776334	-1.89968	0.0136083	-0.807851	0.397571
Smp_168010	150.063	0.545022	0.196195	2.77796	0.00547019	0.0632937	hypothetical protein	1	0.897365	0.211948	-1.10931	29.9593	-2.70823	2.61e-05	-0.845455	0.170435	-1.86277	0.00544632
Smp_096160	480.945	0.659691	0.216416	3.04825	0.00230175	0.0311625	ADP ribosylation factor 13B	1	1.08973	-0.263784	-0.825945	161.3	-2.70988	5.21e-06	-1.76898	0.00302125	-0.940899	0.159663
Smp_100350	768.996	0.844513	0.229127	3.68579	0.000227997	0.00454778	hypothetical protein	1	1.30946	-0.63905	-0.670409	125.755	-2.72128	1.62e-05	-2.55052	2.57e-05	-0.170756	0.853933
Smp_204150	64.8083	0.0505688	0.259822	0.194628	0.845684	0.999981	hypothetical protein	1	1.36249	-0.646287	-0.716205	59.1121	-2.72492	3.04e-07	-2.64795	2.31e-08	-0.0769743	0.931613
Smp_162880	2964.65	-0.0756775	0.223568	-0.338499	0.734987	0.999981	neutral sphingomyelinase	1	1.0226	-0.0410723	-0.981526	458.073	-2.72936	6.8e-18	-1.37516	1.01e-05	-1.3542	4.59e-05
Smp_084650	526.126	0.441681	0.186573	2.36733	0.0179169	0.16045	AMY 1 associating protein expressed in testis	1	0.896519	0.339329	-1.23585	17.5829	-2.73712	0.000423804	-0.614731	0.43078	-2.12238	0.00758554
Smp_210200	165.586	0.684024	0.211125	3.2399	0.00119572	0.0183873	tubulin polyglutamylase ttll9	1	1.31561	-0.486218	-0.829394	49.645	-2.74041	1.89e-07	-2.35333	6.61e-07	-0.38709	0.579847
Smp_011560	8627.88	0.022899	0.118152	0.19381	0.846325	0.999981	tetraspanin CD63 receptor	1	1.26066	-0.526107	-0.734551	533.126	-2.74458	1.68e-19	-2.45011	1.7e-16	-0.29447	0.451218
Smp_018640	687.829	-0.118079	0.15634	-0.755275	0.450084	0.949093	hypothetical protein	1	1.06115	-0.154462	-0.906689	160.107	-2.746	3.03e-07	-1.52853	0.00411624	-1.21746	0.0362368
Smp_129640	634.048	0.0264326	0.188921	0.139913	0.888728	0.999981	FERM RhoGEF and pleckstrin domain containing protein	1	1.08699	-0.0743619	-1.01263	41.0343	-2.75132	0.000990893	-1.40318	0.100371	-1.34815	0.136964
Smp_059780	3593.58	-0.0467682	0.117412	-0.398326	0.69039	0.999981	protoscolex specific coiled coil protein	1	1.20258	-0.377793	-0.824792	742.821	-2.76427	7.21e-16	-2.10649	5.86e-10	-0.657778	0.0932699
Smp_127480	514.478	0.727419	0.179852	4.04455	5.24e-05	0.00131016	von Willebrand factor A domain containing 3B	1	1.39981	-0.827354	-0.572452	90.8958	-2.76451	3.02e-07	-2.96817	6.9e-09	0.203654	0.794196
Smp_097490	2224.11	-0.173449	0.224354	-0.773104	0.439461	0.944714	tubulin polymerization promoting protein family	1	1.36987	-0.744763	-0.62511	82.0229	-2.76547	8.2e-07	-2.79188	1.16e-07	0.0264071	0.982415
Smp_140370	152.312	0.339219	0.202307	1.67675	0.0935905	0.500995	hypothetical protein	1	0.893558	0.265299	-1.15886	67.7392	-2.78681	5.7e-06	-0.715196	0.280415	-2.07161	0.000995018
Smp_018870	536.144	1.5283	0.148519	10.2903	7.79e-25	2.79e-22	hypothetical protein	1	1.36204	-0.576186	-0.785855	155.769	-2.7957	4.55e-07	-2.54949	2.04e-06	-0.246209	0.747551
Smp_105340	755.089	-0.0193956	0.176721	-0.109753	0.912606	0.999981	cyclic nucleotide gated cation channel alpha 3	1	1.53033	-0.668566	-0.861769	24.9228	-2.80759	NA	-2.55287	NA	-0.254717	NA
Smp_151190	310.969	0.562995	0.198407	2.83757	0.00454583	0.0545056	retinal rod rhodopsin sensitive cGMP	1	1.31567	-0.568212	-0.74746	221.751	-2.81248	2.69e-15	-2.53136	4.42e-14	-0.281121	0.554783
Smp_072450	460.996	-0.196141	0.16309	-1.20266	0.229108	0.775065	rhodopsin orphan GPCR	1	1.35802	-0.682379	-0.675644	81.3405	-2.81772	2.18e-05	-2.67422	2.63e-05	-0.143497	0.886629
Smp_199420	122.205	0.830619	0.30951	2.68366	0.00728213	0.0790461	calcium:calmodulin dependent protein kinase type	1	1.37039	-0.634227	-0.736168	52.6374	-2.83393	6.32e-08	-2.65482	3.33e-08	-0.17911	0.819296
Smp_143550	430.136	0.420304	0.256332	1.63968	0.101071	0.521734	hypothetical protein	1	1.17942	-0.210843	-0.968575	46.4336	-2.84388	0.00075546	-1.75525	0.0374195	-1.08863	0.251756
Smp_013610	549.057	0.684209	0.143867	4.75584	1.98e-06	7.55e-05	protein FAM161B	1	0.967467	0.2068	-1.17427	77.6803	-2.85424	0.00111089	-0.875305	0.39193	-1.97894	0.0282042
Smp_170340	2566.2	-0.155446	0.242956	-0.63981	0.522296	0.976976	collagen alpha 1(IV) chain	1	1.20671	-0.334727	-0.871985	44.6172	-2.85628	5.72e-07	-2.04252	5.56e-05	-0.813756	0.229383
Smp_168000	348.766	1.24576	0.15802	7.88352	3.18e-15	5.47e-13	monocarboxylate transporter	1	1.06269	0.186689	-1.24937	38.7959	-2.86941	0.000168262	-0.994455	0.211937	-1.87495	0.0182642
Smp_145060	246.115	0.432868	0.165871	2.60967	0.00906292	0.0946707	acyl CoA:glycerol 3 phosphate acyltransferase	1	1.25025	-0.212655	-1.0376	24.127	-2.87401	6.21e-05	-1.88464	0.00339348	-0.989372	0.234854
Smp_029480	344.656	0.132994	0.158153	0.840917	0.400394	0.92143	Bardet Biedl syndrome 4 protein	1	1.32817	-0.606493	-0.721679	57.6409	-2.87414	1.45e-06	-2.56255	4.07e-06	-0.311583	0.70107
Smp_051090	100.8	-0.161018	0.276486	-0.582372	0.560316	0.985603	hypothetical protein	1	1.05397	-0.0137812	-1.04019	61.5463	-2.87649	8.76e-08	-1.38052	0.00445639	-1.49597	0.00946105
Smp_145640	679.474	0.725606	0.218421	3.32206	0.000893559	0.0142258	forkhead protein: forkhead protein domain	1	1.17209	-0.205081	-0.967006	116.865	-2.89615	7.2e-15	-1.81265	4.85e-08	-1.08349	0.0085045
Smp_045920	850.579	0.0430613	0.176264	0.2443	0.806999	0.999981	hypothetical protein	1	1.10358	-0.0551883	-1.04839	217.264	-2.90511	6.96e-14	-1.5064	3.79e-05	-1.39871	0.000708311
Smp_136340	32.0071	0.385435	0.347833	1.1081	0.267817	0.815382	serine:threonine protein kinase tao1 a	1	1.14795	-0.0135137	-1.13444	27.4273	-2.90961	0.00114509	-1.43507	0.0997297	-1.47454	0.129441
Smp_161570	97.4368	0.421009	0.232683	1.80937	0.0703933	0.419094	centrosomal protein of 120 kDa	1	0.933824	0.436865	-1.37069	19.2047	-2.91161	0.000334464	-0.551027	0.521135	-2.36058	0.00421921
Smp_165950	266.065	0.598898	0.205543	2.91373	0.00357136	0.0445617	tektin 1	1	1.17391	-0.159451	-1.01446	38.4275	-2.93016	3.11e-06	-1.68538	0.00313433	-1.24478	0.0741796
Smp_140920	85.2696	0.227598	0.244978	0.929055	0.352861	0.892744	Glutamate receptor, ionotropic kainate 3	1	1.39922	-0.529393	-0.869825	23.7476	-2.933	0.000683028	-2.43663	0.00220939	-0.496365	0.657752
Smp_140470	407.46	0.682656	0.14949	4.56658	4.96e-06	0.000163917	zinc finger B box domain containing protein 1	1	1.50167	-0.710862	-0.790809	37.3332	-2.94754	0.00136048	-2.74372	0.00190418	-0.203815	0.879326
Smp_140030	1136.72	0.638016	0.134205	4.75405	1.99e-06	7.55e-05	intraflagellar transport 74	1	1.56129	-0.692741	-0.868551	37.1195	-2.95145	0.000234127	-2.91185	0.000119444	-0.0395965	0.979658
Smp_000510	864.571	0.0119419	0.133621	0.0893714	0.928787	0.999981	hypothetical protein	1	1.14486	-0.177331	-0.967529	187.419	-2.95379	7.85e-16	-1.77143	1.92e-07	-1.18237	0.00302613
Smp_133170	322.914	0.825286	0.175572	4.70057	2.59e-06	9.57e-05	vasohibin protein	1	1.47422	-0.804205	-0.670015	54.8342	-2.95634	1.13e-05	-2.97692	2.8e-06	0.0205841	0.99032
Smp_028690	1221.83	0.13933	0.162489	0.857471	0.391185	0.916852	sodium/chloride dependent transporter, putative	1	1.02238	0.23483	-1.25721	296.783	-2.95904	2.96e-07	-0.926974	0.150945	-2.03206	0.000602447
Smp_076930	173.416	0.892447	0.266768	3.34541	0.000821603	0.0133019	rho guanine nucleotide exchange factor 33	1	1.33345	-0.413194	-0.920258	30.7466	-2.9609	4.6e-06	-2.25044	5.48e-05	-0.710459	0.376102
Smp_194770	14673	0.106884	0.163881	0.652204	0.514269	0.97313	taurocyamine kinase	1	1.41236	-0.702474	-0.709883	1079	-2.97352	7.79e-29	-2.90577	1.61e-28	-0.0677513	0.871845
Smp_159090	934.81	0.35587	0.123519	2.8811	0.00396292	0.0485316	hypothetical protein	1	1.39966	-0.548605	-0.851058	43.5931	-2.9847	7.96e-10	-2.60888	4.97e-10	-0.375812	0.570783
Smp_105950	472.411	0.55923	0.152122	3.67618	0.00023675	0.00467893	armadillo repeat containing protein 3	1	1.36433	-0.394291	-0.970038	78.4318	-2.98845	1.13e-06	-2.3442	6.29e-05	-0.644247	0.391069
Smp_017880	1018.28	0.0566253	0.183892	0.307926	0.758138	0.999981	clathrin light chain a	1	1.39029	-0.532929	-0.857361	419.299	-2.98958	1.44e-11	-2.55346	3e-09	-0.436122	0.433799
Smp_129000	422.289	0.160811	0.136648	1.17683	0.239263	0.787197	hypothetical protein	1	1.35969	-0.448098	-0.911591	103.196	-2.99387	3.66e-10	-2.40279	8.67e-08	-0.591081	0.309587
Smp_076860	138.905	0.813572	0.26429	3.07833	0.00208165	0.0286335	B9 domain containing protein 2	1	1.42307	-0.604142	-0.818925	166.435	-3.00977	2.38e-07	-2.65119	1.8e-06	-0.358586	0.642606
Smp_158290	184.161	-0.125657	0.247985	-0.506712	0.612357	0.996858	hypothetical protein	1	1.46485	-0.748197	-0.71665	76.7521	-3.02043	1.43e-05	-2.87515	1.68e-05	-0.14528	0.890114
Smp_104360	19.6815	0.332849	0.430904	0.772445	0.439851	0.944714	hypothetical protein	1	1.50824	-0.779176	-0.729069	37.5181	-3.03039	2.59e-09	-3.06602	4.23e-12	0.0356283	0.972094
Smp_127160	306.85	0.011434	0.146796	0.0778909	0.937915	0.999981	cytochrome b5 reductase	1	0.966596	0.301175	-1.26777	168.603	-3.03223	8.66e-06	-0.780471	0.32914	-2.25176	0.00122128
Smp_145090	1146.52	0.219998	0.124227	1.77094	0.0765706	0.441797	serine incorporator 5	1	1.26422	-0.366133	-0.898089	323.913	-3.03471	4.75e-08	-2.13196	0.000124284	-0.902751	0.152285
Smp_024820	4904.88	0.016181	0.0990399	0.163379	0.87022	0.999981	tetraspanin family protein 16 invertebrate	1	1.14886	-0.147018	-1.00184	956.163	-3.03527	1.18e-22	-1.72036	3.17e-08	-1.31491	5.73e-05
Smp_024370	11649.1	0.10354	0.0961315	1.07707	0.28145	0.830344	hypothetical protein	1	1.48532	-0.784791	-0.70053	1958.03	-3.08907	9.47e-22	-3.10728	2.36e-22	0.0182076	0.976722
Smp_150220	12459.8	0.122807	0.118981	1.03215	0.302001	0.848979	protein tyrosine phosphatase, receptor type, N	1	1.50378	-0.786506	-0.717279	3382.69	-3.09162	6.36e-08	-3.04529	7.34e-08	-0.0463365	0.962395
Smp_160160	169.736	0.574355	0.199079	2.88507	0.00391329	0.0480084	solute carrier family 17	1	1.39257	-0.54056	-0.852005	48.847	-3.09365	1.67e-09	-2.59675	8.07e-09	-0.496899	0.456494
Smp_127250	584.349	0.493678	0.205115	2.40683	0.0160916	0.150043	kinesin associated protein 3	1	1.15	0.0487323	-1.19873	74.6865	-3.12692	2.55e-05	-1.37953	0.0730915	-1.74739	0.0263076
Smp_145000	572.553	0.124444	0.231093	0.5385	0.590232	0.993584	hypothetical protein	1	1.5519	-0.65716	-0.894735	43.9645	-3.13375	0.000228598	-2.73102	0.000771374	-0.402732	0.721771
Smp_141320	376.098	-0.0694671	0.231683	-0.299837	0.764302	0.999981	RILP protein	1	1.21323	-0.0553302	-1.1579	86.6733	-3.14854	1.43e-09	-1.63182	0.000719117	-1.51672	0.00665785
Smp_098650	903.384	1.02306	0.182262	5.61311	1.99e-08	1.19e-06	estrogen receptor beta1	1	1.49619	-0.627922	-0.868271	95.0027	-3.15461	1.44e-08	-2.8341	7.17e-08	-0.32051	0.669867
Smp_122810	413.409	0.505236	0.183083	2.7596	0.0057872	0.0659671	MEChanosensory abnormality family member	1	1.57856	-0.69846	-0.880102	101.941	-3.15788	8.76e-09	-2.9862	6.31e-09	-0.171681	0.834991
Smp_131620	301.224	1.25366	0.175352	7.14938	8.72e-13	1.15e-10	hypothetical protein	1	1.41186	-0.448539	-0.963325	49.0443	-3.1729	4.11e-05	-2.38202	0.00124974	-0.790877	0.39827
Smp_124290	2715.89	0.533462	0.218696	2.43929	0.0147163	0.140573	hypothetical protein	1	1.47744	-0.588748	-0.88869	277.707	-3.17772	5.15e-11	-2.74863	3.85e-09	-0.429093	0.487792
Smp_138430	692.533	0.034708	0.147068	0.235999	0.813433	0.999981	regulator of G protein signaling	1	1.38089	-0.466169	-0.914725	356.955	-3.19451	7.75e-10	-2.43941	1.85e-06	-0.755106	0.213128
Smp_197230	635.485	0.652714	0.154379	4.22798	2.36e-05	0.000635466	adenylate kinase 8	1	1.088	0.14836	-1.23636	170.592	-3.20001	3e-12	-1.16646	0.0107927	-2.03355	1.66e-05
Smp_173150	1330.58	0.718065	0.271396	2.64582	0.00814939	0.0867083	cd63 antigen	1	1.48911	-0.523969	-0.965143	95.701	-3.20226	6.12e-07	-2.58793	2.09e-05	-0.614337	0.442129
Smp_043040	86.2106	0.68375	0.233661	2.92624	0.00343082	0.043058	hypothetical protein	1	1.34177	-0.242517	-1.09925	33.5973	-3.20579	7.05e-05	-2.0038	0.00844614	-1.20198	0.188385
Smp_121320	135.492	0.528889	0.195102	2.71084	0.00671129	0.0739705	hypothetical protein	1	1.41144	-0.398286	-1.01316	54.9656	-3.21375	1.62e-06	-2.3375	0.000145212	-0.876251	0.270192
Smp_143480	2266.25	0.0830807	0.122258	0.679552	0.496788	0.964173	hypothetical protein	1	1.33486	-0.321619	-1.01324	605.997	-3.22369	2.3e-15	-2.21273	4.58e-08	-1.01096	0.0246106
Smp_134660	785.828	1.0419	0.163734	6.36336	1.97e-10	1.86e-08	radial spoke head protein 4 A	1	1.55455	-0.771465	-0.783088	153.232	-3.2414	2.46e-14	-3.14711	2.6e-15	-0.0942948	0.889844
Smp_133750	792.968	-0.0156306	0.152604	-0.102426	0.918418	0.999981	hypothetical protein	1	1.54308	-0.713319	-0.829757	49.2962	-3.25167	7.15e-08	-3.02571	3.02e-08	-0.225956	0.800433
Smp_170690	59.4346	0.522101	0.272584	1.91538	0.0554444	0.358679	proline oxidase	1	1.17954	0.0313956	-1.21094	47.8605	-3.25389	3.56e-10	-1.52029	0.000564699	-1.7336	0.00173633
Smp_051220	549.72	0.940811	0.242937	3.87266	0.000107654	0.00237917	lisH domain containing protein FOPNL	1	1.37103	-0.281001	-1.09003	42.6227	-3.25823	5.84e-06	-2.06094	0.00231813	-1.19729	0.140477
Smp_169070	178.432	0.346282	0.17688	1.95773	0.0502622	0.333989	protein sfi1	1	1.00808	0.415407	-1.42348	58.436	-3.2688	2.17e-09	-0.710834	0.160506	-2.55796	4.04e-06
Smp_135480	289.861	0.74803	0.154197	4.85112	1.23e-06	4.98e-05	intraflagellar transport protein 88	1	1.41622	-0.385202	-1.03102	48.2973	-3.27169	4.55e-05	-2.32102	0.00266401	-0.95067	0.311745
Smp_147280	47.7936	0.497958	0.277008	1.79763	0.0722353	0.426516	protein xrp2	1	1.50385	-0.277712	-1.22613	21.1493	-3.28383	0.000384344	-2.17147	0.0118811	-1.11236	0.299134
Smp_152300	408.965	0.118866	0.168619	0.704939	0.480848	0.957835	hypothetical protein	1	1.21688	-0.0457108	-1.17117	110.793	-3.29327	7.15e-16	-1.66008	1.63e-06	-1.63319	0.00017778
Smp_148160	165.184	0.919166	0.18894	4.86485	1.15e-06	4.69e-05	Spermatogenesis associated protein 6	1	1.57227	-0.481089	-1.09118	24.6923	-3.29804	0.000281115	-2.5494	0.00267285	-0.748634	0.50478
Smp_159340	518.81	0.37167	0.182323	2.03852	0.0414975	0.293625	Dynein intermediate chain	1	1.21213	0.0207755	-1.2329	132.374	-3.30265	2.8e-20	-1.55797	4.03e-07	-1.74468	3.75e-06
Smp_060160	323.804	0.551504	0.183608	3.0037	0.00266722	0.0347953	spef1-like protein	1	1.53706	-0.590139	-0.946921	118.052	-3.31352	6.27e-11	-2.83674	1.5e-09	-0.476782	0.464916
Smp_162260	3959.1	0.313384	0.131066	2.39104	0.0168009	0.15333	phosphatidylinositol binding clathrin assembly	1	1.59841	-0.791496	-0.806911	1028.6	-3.33552	2.1e-15	-3.23966	6.01e-15	-0.0958598	0.883393
Smp_129020	175.542	0.167646	0.202659	0.827233	0.408105	0.922302	innexin unc 9	1	1.40162	-0.288341	-1.11328	28.6038	-3.34066	4.72e-06	-2.18821	0.000689132	-1.15245	0.171016
Smp_056700	528.938	1.71001	0.30548	5.5978	2.17e-08	1.29e-06	membrane associated RING finger protein	1	1.57639	-0.51398	-1.0624	102.503	-3.34821	7.8e-06	-2.63016	0.000331409	-0.718054	0.432097
Smp_001000	397.896	0.2764	0.203519	1.3581	0.174431	0.688512	universal stress protein	1	1.59303	-0.722805	-0.870221	574.668	-3.37658	5.19e-20	-3.14472	1.62e-18	-0.231854	0.646397
Smp_126990	4293.66	0.286909	0.14218	2.01792	0.0435996	0.304489	synapsin	1	1.58245	-0.601031	-0.981415	904.211	-3.38788	1.13e-10	-2.92063	2.23e-08	-0.467251	0.479465
Smp_145110	119.128	-0.114373	0.2508	-0.456032	0.648367	0.999981	hypothetical protein	1	1.13788	0.402413	-1.54029	32.9093	-3.41025	7.2e-06	-0.840809	0.278703	-2.56944	0.000962163
Smp_138490	114.789	0.390683	0.218071	1.79154	0.0732065	0.429888	Bardet Biedl syndrome 5	1	1.38316	-0.201594	-1.18156	38.8784	-3.41516	4.62e-09	-2.0656	1.23e-05	-1.34956	0.0392604
Smp_132930	536.358	0.192787	0.165528	1.16468	0.24415	0.791943	cubilin	1	1.20868	0.308908	-1.51758	29.5245	-3.4315	5.7e-05	-1.06504	0.216127	-2.36645	0.00740523
Smp_141960	454.465	0.38973	0.250959	1.55296	0.120432	0.573304	ankyrin repeat domain containing protein 60	1	1.57521	-0.530212	-1.045	60.9297	-3.5191	4.01e-10	-2.80056	1.83e-08	-0.718547	0.301107
Smp_125980	537.796	0.567802	0.208548	2.72264	0.00647618	0.0720137	tetratricopeptide repeat protein 25	1	1.65313	-0.722187	-0.930942	87.5329	-3.52038	5.5e-06	-3.04146	4.75e-05	-0.478927	0.635561
Smp_138330	203.617	0.750138	0.163699	4.58241	4.6e-06	0.000154356	tetraspanin	1	1.28759	0.201384	-1.48898	116.645	-3.55836	5.42e-11	-1.36409	0.00931082	-2.19427	9.47e-05
Smp_197950	303.539	-0.285812	0.258022	-1.1077	0.26799	0.815382	hypothetical protein	1	1.74017	-0.553799	-1.18637	30.0114	-3.56479	0.000785432	-2.74488	0.00745764	-0.819902	0.528049
Smp_034120	2915.63	0.0687095	0.158537	0.433397	0.664727	0.999981	synaptosomal associated protein 23 kDa	1	1.60065	-0.658874	-0.941773	1195.4	-3.61222	4.06e-26	-3.07995	5.02e-20	-0.532275	0.194447
Smp_135230	129.071	-0.49461	0.415248	-1.19112	0.233607	0.780242	Tyrosine DeCarboxylase family member (tdc 1)	1	1.67798	-0.176131	-1.50185	23.4503	-3.61768	0.000275875	-2.18221	0.0180697	-1.43547	0.200705
Smp_137930	129.387	0.801443	0.195835	4.09243	4.27e-05	0.00108575	hypothetical protein	1	1.68954	-0.577477	-1.11207	35.5819	-3.62777	1.65e-08	-3.0073	2.62e-08	-0.62047	0.460342
Smp_104120	43.5977	1.46743	0.33812	4.33997	1.43e-05	0.000413881	hypothetical protein	1	1.68007	-0.47107	-1.209	29.6796	-3.63187	2.44e-07	-2.80189	4.4e-07	-0.829975	0.351259
Smp_134750	218.744	0.30054	0.212722	1.41283	0.157705	0.652773	hypothetical protein	1	1.23123	0.384201	-1.61543	30.6937	-3.67892	8.43e-06	-1.11075	0.166451	-2.56817	0.00266169
Smp_178650	128.23	0.757433	0.23767	3.18691	0.00143804	0.0212055	hypothetical protein	1	1.75359	-0.613188	-1.1404	27.8011	-3.68007	2.45e-05	-2.99995	0.000168505	-0.680123	0.541941
Smp_132920	155.776	-0.0485903	0.228108	-0.213015	0.831315	0.999981	hypothetical protein	1	1.51945	-0.0284354	-1.49101	24.5001	-3.6936	3.07e-05	-1.97071	0.0128698	-1.72288	0.077042
Smp_030910	44.0722	0.843424	0.369552	2.28229	0.0224721	0.189008	dynein light chain	1	1.45101	0.0710906	-1.52211	23.8108	-3.74069	7.32e-07	-1.77231	0.00234154	-1.96838	0.0161159
Smp_168020	105.848	0.399659	0.206296	1.93731	0.052708	0.34583	AMY 1 associating protein expressed in testis	1	1.29126	0.710377	-2.00163	21.0328	-3.82344	4.52e-05	-0.656647	0.501839	-3.16679	0.000852937
Smp_049160	576.836	0.640667	0.179445	3.57027	0.000356615	0.00662164	zinc finger protein	1	1.15094	0.550044	-1.70099	111.502	-3.86451	7.76e-10	-0.676917	0.333114	-3.18759	4.55e-07
Smp_198430	1250.98	0.185904	0.133732	1.39012	0.164492	0.66673	solute carrier family 12	1	1.61877	-0.10541	-1.51336	33.9835	-3.89328	7.67e-07	-2.19561	0.00148457	-1.69767	0.0502964
Smp_204110	268.486	0.842758	0.178036	4.73365	2.21e-06	8.24e-05	hypothetical protein	1	1.67128	-0.322833	-1.34844	43.8473	-3.91845	5.73e-10	-2.65119	1.41e-07	-1.26727	0.0839695
Smp_052880	6036.59	-0.206559	0.156734	-1.3179	0.187538	0.714339	hypothetical protein	1	1.726	-0.524727	-1.20128	518.062	-3.92673	1.66e-14	-2.99687	1.68e-09	-0.929861	0.115556
Smp_156860	404.486	0.844762	0.182957	4.61727	3.89e-06	0.000134787	meckelin	1	1.75903	-0.622123	-1.13691	100.886	-3.95369	1.25e-09	-3.13876	3.07e-07	-0.814935	0.301058
Smp_077980	2148.53	0.204053	0.107574	1.89686	0.0578464	0.366474	neuroendocrine convertase 2	1	1.80645	-0.726958	-1.07949	2346.14	-4.04723	1.5e-22	-3.44795	7.26e-17	-0.599281	0.228848
Smp_150060	355.086	-0.00984417	0.17839	-0.0551834	0.955992	0.999981	tripartite motif containing protein 3	1	1.75206	-0.431947	-1.32011	77.8863	-4.165	5.71e-13	-2.92783	7.65e-09	-1.23717	0.0615403
Smp_130960	247.01	1.00531	0.160165	6.27675	3.46e-10	3.16e-08	coiled coil domain containing protein 135	1	1.8684	-0.316147	-1.55225	42.0993	-4.29091	2.03e-06	-2.75457	0.00099403	-1.53635	0.132615
Smp_052150	253.789	1.15573	0.194754	5.93429	2.95e-09	2.15e-07	hypothetical protein	1	1.6242	-0.0580803	-1.56612	115.998	-4.33159	6.78e-18	-2.22762	1.57e-07	-2.10397	8.11e-05
Smp_072990	363.782	0.00818982	0.187984	0.0435666	0.96525	0.999981	Transmembrane protein 185B	1	1.59295	-0.0751227	-1.51782	339.078	-4.34136	4.79e-26	-2.25362	3.91e-09	-2.08775	1.27e-06
Smp_151640	60.3368	-0.327464	0.442604	-0.739857	0.459387	0.951071	hypothetical protein	1	1.57778	0.802117	-2.3799	23.6965	-4.38254	7.63e-06	-0.861221	0.378192	-3.52132	0.000398156
Smp_131640	339.39	-0.0344028	0.165211	-0.208235	0.835045	0.999981	rna binding protein musashi	1	2.13775	-0.287823	-1.84993	27.154	-4.39669	2.6e-05	-2.94894	0.00170888	-1.44776	0.232588
Smp_174770	117.221	0.842406	0.255574	3.29614	0.000980233	0.0154342	coiled coil domain containing protein 146	1	1.99894	-0.371109	-1.62783	30.0887	-4.39722	8.96e-08	-3.10677	4.72e-06	-1.29045	0.18485
Smp_043920	93.6443	0.651588	0.251713	2.58862	0.00963624	0.099451	#N/A	1	1.71089	0.263332	-1.97422	31.339	-4.42695	3.31e-08	-1.85138	0.00154095	-2.57556	0.00245233
Smp_203530	224.852	0.452706	0.263594	1.71743	0.0858998	0.473953	intraflagellar transport protein 172	1	1.60444	1.01855	-2.62299	16.4895	-4.44107	3.21e-06	-0.670064	0.393613	-3.77101	8.86e-05
Smp_144370	260.964	1.0491	0.178468	5.8784	4.14e-09	2.97e-07	leucine rich repeat containing protein 71	1	1.94414	-0.343708	-1.60043	36.021	-4.46348	2.55e-07	-2.90204	0.000164258	-1.56144	0.112075
Smp_173760	415.969	0.0450411	0.135538	0.332315	0.739652	0.999981	hypothetical protein	1	2.07817	0.364576	-2.44274	19.8099	-4.47825	4.09e-05	-2.00636	0.045731	-2.47189	0.0338374
Smp_181040	149.951	0.611365	0.189011	3.23455	0.00121836	0.0186374	KIF1 binding protein	1	1.58041	0.513121	-2.09353	56.3692	-4.545	8.13e-10	-1.32991	0.04205	-3.21508	2.17e-05
Smp_159930	214.482	0.66277	0.229733	2.88496	0.00391461	0.0480084	ADP ribosylation factor 3	1	1.77588	0.0168168	-1.7927	108.601	-4.71533	7.09e-20	-2.34631	6.02e-10	-2.36902	1.59e-05
Smp_153900	60.6305	0.253236	0.301458	0.840037	0.400888	0.92143	amiloride sensitive cation channel	1	2.01154	0.0807361	-2.09228	30.1648	-4.80763	1.09e-08	-2.56684	1.14e-05	-2.24079	0.0152822
Smp_010720	20.7977	0.67448	0.432806	1.55839	0.119141	0.57176	elongation of fatty acids protein 1	1	1.83707	0.485123	-2.3222	28.6964	-4.92223	6.63e-10	-1.7543	0.000191734	-3.16793	0.000140487
Smp_169090	323.85	0.715222	0.264992	2.69903	0.00695409	0.0762732	solute carrier family 43	1	2.07654	0.415791	-2.49233	31.6564	-5.11761	1.32e-07	-2.09222	0.0152701	-3.02539	0.00296798
Smp_154680	231.99	-0.755101	0.158054	-4.77749	1.77e-06	6.84e-05	glycosyltransferase 14 family member	#N/A	#N/A	#N/A	#N/A	26.5784	7.12602	6.25e-12	2.28358	0.0632083	4.84244	7.69e-09
Smp_133430	23.2411	-0.715285	0.406128	-1.76123	0.0781992	0.446782	hypothetical protein	#N/A	#N/A	#N/A	#N/A	13.5746	6.82931	4.1e-09	0	1	6.80266	3.17e-09
Smp_123550	213.35	-3.91482	0.306151	-12.7872	1.93e-37	1.51e-34	Venom allergen-like protein 8	#N/A	#N/A	#N/A	#N/A	19.5062	6.80048	9.96e-10	1.91543	0.15829	4.88505	7.85e-07
Smp_134040	850.557	-0.546731	0.352786	-1.54975	0.121201	0.575422	Ecdysone induced protein 74EF B	#N/A	#N/A	#N/A	#N/A	21.5219	6.36341	7.21e-09	2.46134	0.0495035	3.90207	4.55e-05
Smp_123540	131.367	-3.65195	0.304518	-11.9925	3.89e-33	2.23e-30	venom allergen-like (VAL) protein 12	#N/A	#N/A	#N/A	#N/A	15.108	6.29095	9.58e-08	1.25184	0.427375	5.03911	5.97e-06
Smp_075350	1206.45	-0.551751	0.303808	-1.81612	0.0693523	0.41433	hypothetical protein	#N/A	#N/A	#N/A	#N/A	20.8214	6.14297	7.97e-11	-0.372033	0.836694	6.51501	2.98e-11
Smp_170040	251.255	-0.613449	0.321747	-1.90662	0.0565699	0.362226	hypothetical protein	#N/A	#N/A	#N/A	#N/A	14.8974	5.95055	1.17e-07	1.03024	0.528842	4.92031	2.05e-06
Smp_136430	208.075	-0.322386	0.167898	-1.92013	0.0548414	0.355979	hypothetical protein	#N/A	#N/A	#N/A	#N/A	11.1193	5.89181	2.01e-07	-0.604648	0.748445	6.49646	1.93e-08
Smp_167430	333.107	-0.095205	0.160843	-0.591914	0.553908	0.985603	hypothetical protein	#N/A	#N/A	#N/A	#N/A	10.9703	5.7329	2.26e-07	1.47946	0.293329	4.25344	2.87e-05
Smp_149970	43.8233	-0.36444	0.375958	-0.969364	0.332364	0.873535	hypothetical protein	#N/A	#N/A	#N/A	#N/A	18.8225	5.63754	1.6e-10	1.07624	0.3746	4.5613	7.03e-09
Smp_153260	70.1507	-0.489119	0.262724	-1.86173	0.0626418	0.387154	hypothetical protein	#N/A	#N/A	#N/A	#N/A	5.29379	5.58639	5.97e-06	0.62554	0.744878	4.96085	4.55e-05
Smp_194970	524.666	-0.553715	0.183232	-3.02193	0.0025117	0.0332159	25 kDa integral membrane protein	#N/A	#N/A	#N/A	#N/A	48.3755	5.48682	6.32e-14	0.00538104	1	5.48144	4.98e-14
Smp_136420	261.657	-0.208416	0.212239	-0.981987	0.326106	0.869044	hypothetical protein	#N/A	#N/A	#N/A	#N/A	6.76634	5.46636	4.86e-05	0	1	5.45082	4.22e-05
Smp_102190	246.98	-0.767112	0.184026	-4.1685	3.07e-05	0.000805614	steroid dehydrogenase	#N/A	#N/A	#N/A	#N/A	10.6035	5.43692	6.13e-07	0.779596	0.631287	4.65732	6.42e-06
Smp_193630	31.9003	1.76479	0.410062	4.30371	1.68e-05	0.000473368	endoglycoceramidase	#N/A	#N/A	#N/A	#N/A	37.8237	5.27559	2.34e-12	-1.61799	0.201003	6.89357	3.72e-13
Smp_031680	103.314	0.107534	0.233103	0.461315	0.644573	0.999981	nicotinic acetylcholine receptor	#N/A	#N/A	#N/A	#N/A	16.1439	5.2182	2.44e-08	-0.794971	0.594774	6.01317	1.17e-09
Smp_170050	438.456	-0.862091	0.239936	-3.593	0.000326887	0.00620682	hypothetical protein	#N/A	#N/A	#N/A	#N/A	20.8745	5.18393	1.55e-10	0.587174	0.642224	4.59676	1.5e-09
Smp_163930	2625.81	-0.677612	0.172573	-3.92653	8.62e-05	0.00197367	hypothetical protein	#N/A	#N/A	#N/A	#N/A	42.6617	5.1753	1.29e-13	-2.13038	0.0730915	7.30568	2.52e-14
Smp_181140	2252.05	-0.352623	0.238932	-1.47583	0.13999	0.613087	hypothetical protein	#N/A	#N/A	#N/A	#N/A	26.7273	5.12349	2.51e-07	2.28746	0.0377661	2.83603	0.00204738
Smp_160480	122.979	-0.339256	0.396048	-0.856603	0.391664	0.916977	hypothetical protein	#N/A	#N/A	#N/A	#N/A	11.6418	5.0445	4.11e-07	1.09055	0.420116	3.95395	1.44e-05
Smp_077860	45.0028	-3.05107	0.365654	-8.34414	7.17e-17	1.47e-14	actin	#N/A	#N/A	#N/A	#N/A	9.91086	4.96151	0.000168968	0	1	4.94381	0.0001519
Smp_160470	541.78	-0.515175	0.258599	-1.99218	0.0463513	0.316256	TBC1 domain family B	#N/A	#N/A	#N/A	#N/A	20.4728	4.92406	2.02e-07	-0.0393278	0.986052	4.96339	1.37e-07
Smp_204760	976.966	-0.390965	0.621548	-0.629018	0.529337	0.979912	Asparagine rich protein (Ag319) (ARP)	2	0.17912	-1.93911	1.75999	30.7545	1.94818	0.0508856	-2.36645	0.0211784	4.31463	6.09e-06
Smp_127270	90.3864	-0.785934	0.226258	-3.47362	0.000513478	0.00906442	Cytochrome b561:ferric reductase	#N/A	#N/A	#N/A	#N/A	40.8583	4.8951	1.03e-12	1.57556	0.0569989	3.31955	3.41e-09
Smp_163940	43.8053	-0.549736	0.411	-1.33756	0.181041	0.700455	#N/A	#N/A	#N/A	#N/A	#N/A	12.7122	4.78733	0.000106686	0	1	4.77201	9.96e-05
Smp_150350	1654.9	-0.645608	0.142456	-4.53199	5.84e-06	0.00019028	synaptotagmin XIV	#N/A	#N/A	#N/A	#N/A	29.9777	4.76684	2.06e-09	0.409576	0.748445	4.35727	1.38e-08
Smp_134620	4336.63	-0.181193	0.21736	-0.833611	0.4045	0.92143	monocarboxylate transporter	#N/A	#N/A	#N/A	#N/A	9.80371	4.65985	9.47e-06	-0.69397	0.67947	5.35382	9.48e-07
Smp_075420	7791.56	-0.211057	0.270686	-0.779713	0.43556	0.941732	hypothetical protein	#N/A	#N/A	#N/A	#N/A	44.0958	4.61734	1.1e-10	-0.55	0.640775	5.16734	5.16e-12
Smp_165340	72.2879	0.949602	0.420714	2.25712	0.0240007	0.198208	alpha tocopherol transfer protein	#N/A	#N/A	#N/A	#N/A	7.49662	4.59292	0.000502644	0.533976	0.787944	4.05894	0.00183054
Smp_172520	347.128	-0.799539	0.181085	-4.41528	1.01e-05	0.000304303	hypothetical protein	#N/A	#N/A	#N/A	#N/A	9.50717	4.57064	4.6e-06	-0.686264	0.674267	5.2569	5.15e-07
Smp_075430	113.228	-0.348138	0.214448	-1.62341	0.104502	0.530031	hypothetical protein	2	0.412131	-2.35273	1.9406	21.89	1.90506	0.0707491	-2.94627	0.0057332	4.85133	1.49e-06
Smp_149880	666.855	-0.193134	0.180422	-1.07046	0.284413	0.832234	major facilitator superfamily domain containing protein	#N/A	#N/A	#N/A	#N/A	13.5191	4.55146	3.96e-05	-0.137749	0.943443	4.68921	2.03e-05
Smp_179700	30.1741	-0.990212	0.392102	-2.5254	0.0115568	0.115662	hypothetical protein	#N/A	#N/A	#N/A	#N/A	8.27906	4.47165	1.86e-05	0.0732675	0.972853	4.39838	2.03e-05
Smp_153110	276.703	-0.19766	0.210703	-0.938098	0.348194	0.88773	beta 1,4 galactosyltransferase 3	#N/A	#N/A	#N/A	#N/A	11.4489	4.46632	3.79e-06	0.545148	0.717921	3.92117	2.06e-05
Smp_139970	4410.33	-0.668132	0.164043	-4.07291	4.64e-05	0.00117745	Calmodulin 4 (Calcium binding protein Dd112)	#N/A	#N/A	#N/A	#N/A	17.5158	4.44344	8.13e-07	0.778407	0.547825	3.66503	1.45e-05
Smp_175280	170.629	-0.782413	0.218605	-3.57912	0.000344758	0.00645726	hypothetical protein	#N/A	#N/A	#N/A	#N/A	16.2247	4.43507	5.67e-08	-1.2842	0.298563	5.71927	5.53e-10
Smp_133650	44.5487	-0.432062	0.294531	-1.46695	0.14239	0.618559	hypothetical protein	#N/A	#N/A	#N/A	#N/A	12.888	4.37124	4.16e-05	-1.47434	0.32187	5.84558	3.31e-07
Smp_005360	549.106	-0.302886	0.269349	-1.12451	0.260796	0.812548	hypothetical protein	#N/A	#N/A	#N/A	#N/A	12.126	4.35909	7.99e-07	1.56008	0.132901	2.799	0.000621967
Smp_095290	19.3101	-0.971391	0.54391	-1.78594	0.0741087	0.432506	protein ovo	#N/A	#N/A	#N/A	#N/A	12.4066	4.35782	0.000817302	1.22928	0.455783	3.12854	0.0144438
Smp_197400	507.864	-0.342481	0.302148	-1.13349	0.25701	0.807571	hypothetical protein	#N/A	#N/A	#N/A	#N/A	10.0075	4.35048	4.06e-07	0.0542736	0.977438	4.29621	4.25e-07
Smp_214180	5081.27	-0.673616	0.257973	-2.61119	0.00902276	0.0944808	calpain	#N/A	#N/A	#N/A	#N/A	32.84	4.34243	3.68e-07	-0.186793	0.903061	4.52923	1.19e-07
Smp_025830	730.223	-0.621188	0.281137	-2.20955	0.0271361	0.216811	adp ribosyl cyclase	#N/A	#N/A	#N/A	#N/A	24.5114	4.33053	6.54e-10	0.0986775	0.939797	4.23186	8.96e-10
Smp_202610	4148.52	0.0206366	0.263387	0.0783508	0.937549	0.999981	hypothetical protein	#N/A	#N/A	#N/A	#N/A	17.3456	4.2918	1.33e-09	1.36337	0.107425	2.92842	4.59e-06
Smp_122050	454.057	-0.457049	0.133225	-3.43065	0.000602135	0.0102643	lag1 longevity assurance 1	#N/A	#N/A	#N/A	#N/A	25.7942	4.25532	6.09e-08	-0.673375	0.570405	4.9287	1.15e-09
Smp_156370	230.925	0.728026	0.184457	3.94685	7.92e-05	0.00183491	coiled coil domain containing protein 147	2	0.393276	-1.98762	1.59435	76.0091	1.69168	0.0722617	-2.98168	0.000798177	4.67336	4.19e-08
Smp_176930	2179.91	-1.1499	0.333259	-3.45048	0.000559598	0.0096798	cationic amino acid transporter	#N/A	#N/A	#N/A	#N/A	13.7695	4.24777	0.000583881	1.3176	0.385892	2.93017	0.0156431
Smp_158520	440.958	-0.0756866	0.317625	-0.238289	0.811657	0.999981	diacylglycerol O acyltransferase	#N/A	#N/A	#N/A	#N/A	10.2451	4.22606	7.32e-07	-1.48141	0.252532	5.70747	7.63e-09
Smp_203030	540.658	-0.439909	0.216376	-2.03308	0.0420445	0.297251	hypothetical protein	#N/A	#N/A	#N/A	#N/A	9.90386	4.19705	5.14e-06	-0.180537	0.914934	4.37758	2.33e-06
Smp_130250	1510.42	-0.960276	0.391635	-2.45197	0.0142077	0.136457	dual specificity	#N/A	#N/A	#N/A	#N/A	12.7049	4.19584	7.08e-06	0.554404	0.704001	3.64143	3.83e-05
Smp_152960	1326.2	-0.136744	0.382449	-0.357548	0.720682	0.999981	rab effector MyRIP	#N/A	#N/A	#N/A	#N/A	13.0671	4.148	2.87e-06	-2.22952	0.077997	6.37752	1.82e-09
Smp_187170	55.275	-0.352352	0.305833	-1.15211	0.249278	0.795769	hypothetical protein	#N/A	#N/A	#N/A	#N/A	14.563	4.13542	8.95e-06	-0.414594	0.784832	4.55001	1.38e-06
Smp_128860	885.898	-3.48842	0.204312	-17.0739	2.32e-65	6.65e-62	lysyl oxidase 2	#N/A	#N/A	#N/A	#N/A	15.0503	4.13503	5.11e-05	-0.280368	0.86858	4.41539	1.42e-05
Smp_146760	318.421	0.288222	0.308446	0.934431	0.350082	0.889377	hypothetical protein	#N/A	#N/A	#N/A	#N/A	38.8869	4.0972	4.26e-07	-0.96823	0.411981	5.06543	3.7e-09
Smp_161650	118.41	-0.772656	0.241165	-3.20385	0.00135604	0.0202394	hypothetical protein	#N/A	#N/A	#N/A	#N/A	6.4309	4.08481	0.00157293	1.28155	0.427425	2.80327	0.0265423
Smp_083430	363.309	-0.415657	0.171474	-2.42402	0.0153498	0.145173	hypothetical protein	#N/A	#N/A	#N/A	#N/A	4.2801	4.05473	0.00120176	1.61381	0.272961	2.44091	0.0460154
Smp_000340	329.921	-0.17684	0.16908	-1.04589	0.295611	0.842069	ecdysone-induced protein E78	#N/A	#N/A	#N/A	#N/A	12.3595	4.05026	0.000155338	-0.997167	0.505219	5.04743	3.91e-06
Smp_085180	1037.63	0.165135	0.319427	0.516973	0.605175	0.996858	cathepsin B (C01 family)	#N/A	#N/A	#N/A	#N/A	12.048	4.02978	1.9e-07	0.833235	0.42679	3.19655	1.04e-05
Smp_058380	459.821	0.384716	0.177723	2.16469	0.0304113	0.236176	latrophilin 3, CRA g	#N/A	#N/A	#N/A	#N/A	14.5251	4.01593	8.48e-05	0.923989	0.488014	3.09194	0.00218293
Smp_134800	1842.53	0.112793	0.150965	0.747149	0.454974	0.949958	tyrosine protein kinase	#N/A	#N/A	#N/A	#N/A	21.1103	3.9868	5.63e-05	-1.06857	0.421599	5.05537	5.16e-07
Smp_158620	1075.21	-0.47673	0.143391	-3.32469	0.00088516	0.0141417	retinaldehyde binding protein	2	0.502336	-1.90585	1.40351	272.8	1.4798	0.000127663	-3.27255	7.51e-17	4.75235	4.58e-35
Smp_165440	1746.03	-0.118941	0.133594	-0.890315	0.373297	0.904773	netrin receptor unc 5	2	0.456393	-1.90155	1.44516	200.978	1.46633	NA	-3.00458	NA	4.47091	NA
Smp_058450	3592.39	-0.209873	0.143493	-1.4626	0.143577	0.621828	protein phosphatase 1 regulatory subunit	2	0.411076	-1.83465	1.42357	261.372	1.46624	0.0198622	-2.95471	5.52e-07	4.42095	1.22e-14
Smp_145320	1066.96	-0.0952832	0.118956	-0.800999	0.423132	0.934653	solute carrier family 26	2	0.637126	-2.26588	1.62876	40.0568	1.44725	0.0326465	-3.69978	2.97e-07	5.14702	2.45e-13
Smp_143690	1671.06	-0.486859	0.172229	-2.82682	0.00470134	0.0559023	feline leukemia virus subgroup C	2	0.0659814	-1.17964	1.11366	130.241	1.43114	0.00924001	-1.63708	0.00274092	3.06822	2.47e-09
Smp_144020	661.24	0.0572321	0.248277	0.230517	0.81769	0.999981	glutamine rich protein 2	2	0.48538	-2.14404	1.65866	37.8714	1.43022	0.245246	-2.91328	0.00893665	4.3435	4.52e-05
Smp_204310	71.4434	-0.236447	0.422999	-0.558978	0.576177	0.990953	hypothetical protein	2	0.621241	-2.14966	1.52842	90.3022	1.41893	0.00108556	-3.69584	4.86e-14	5.11477	1.87e-26
Smp_168560	712.907	-0.416716	0.134956	-3.08779	0.00201648	0.0278708	steroid dehydrogenase	2	0.206867	-1.31222	1.10535	34.0543	1.41236	0.0304254	-1.91553	0.0049585	3.3279	2.23e-07
Smp_179750	925.67	-0.019554	0.133516	-0.146455	0.883563	0.999981	protocadherin 1	2	0.72501	-2.37405	1.64904	107.343	1.403	0.0525372	-3.98603	7.69e-09	5.38903	1.42e-15
Smp_156230	1022.85	-0.452177	0.278928	-1.62112	0.104991	0.53174	hypothetical protein	2	0.456952	-1.7854	1.32845	160.428	1.38585	0.00086665	-3.02219	7.92e-13	4.40804	1.24e-26
Smp_194830	3527.74	0.199047	0.225996	0.880754	0.378451	0.908127	SmKK7	2	0.283384	-1.43657	1.15318	48.4867	1.37867	0.0247831	-2.23134	0.000315609	3.61001	1.15e-09
Smp_138290	3174.59	-0.24802	0.298947	-0.829646	0.406739	0.922135	hypothetical protein	2	0.677048	-2.29753	1.62048	63.1325	1.3721	0.0815159	-3.65682	3.32e-06	5.02892	5.27e-11
Smp_154010	4649.22	-0.402227	0.152717	-2.6338	0.0084435	0.0893951	Halobacterial transducer protein VI	2	0.565135	-1.8541	1.28896	170.154	1.37128	0.0071937	-3.23886	6.93e-11	4.61014	2.19e-21
Smp_045500	3443.58	-0.130165	0.158277	-0.822388	0.410856	0.923757	annexin	2	0.272267	-1.50134	1.22907	50.2912	1.35307	0.0248742	-2.26159	0.00019131	3.61466	5.13e-10
Smp_138440	2296.26	-0.128933	0.140155	-0.919932	0.357608	0.893988	ubiquitin ligase E3	2	0.331646	-1.25122	0.919573	32.5926	1.29897	0.220851	-1.80606	0.0741352	3.10503	0.000927511
Smp_146950	1681.37	0.0370165	0.199783	0.185283	0.853007	0.999981	basement membrane specific heparan sulfate	2	0.414406	-1.65731	1.2429	37.5643	1.28696	0.102711	-2.64831	0.000520433	3.93527	8.9e-08
Smp_205920	194.098	0.121558	0.204162	0.595401	0.551576	0.985603	protocadherin 1	2	1.23994	-3.17997	1.94003	36.6112	1.27897	0.0106761	-5.16259	2.12e-11	6.44156	1.94e-17
Smp_029470	791.368	0.0318917	0.150538	0.211851	0.832223	0.999981	thimet oligopeptidase	2	0.161069	-1.0688	0.907736	63.3229	1.2601	0.00175551	-1.59624	0.00013455	2.85634	7.78e-13
Smp_156770	29825.6	-0.021158	0.170306	-0.124235	0.901129	0.999981	major tegumental antigen SM15	2	0.467234	-1.75284	1.28561	449.978	1.24905	0.0342833	-2.93757	4.72e-08	4.18662	1.46e-15
Smp_149010	3409.55	-0.292876	0.111888	-2.61758	0.00885551	0.0931895	protocadherin gamma b	2	1.08268	-3.03457	1.9519	32.7227	1.23782	0.137732	-4.53753	4.4e-07	5.77535	5.72e-11
Smp_156970	675.414	-0.039557	0.161298	-0.245242	0.806269	0.999981	cadherin	2	0.774799	-2.44467	1.66987	155.913	1.23642	0.234726	-3.86714	1.55e-05	5.10356	5.26e-09
Smp_171140	7900.5	-0.517106	0.212835	-2.42961	0.0151152	0.143745	serine rich repeat protein	2	0.743693	-2.33729	1.59359	137.812	1.2322	0.0233501	-4.05291	9.4e-14	5.28511	5.25e-23
Smp_135600	439.652	-0.1937	0.174715	-1.10866	0.267578	0.815382	zinc finger protein	2	0.397413	-1.53912	1.14171	101.211	1.22416	0.122487	-2.45522	0.00071016	3.67938	1.4e-07
Smp_130920	1801.87	-0.528204	0.608596	-0.867907	0.385445	0.915127	multiple C2 and transmembrane domain containing protein	2	0.913662	-2.60318	1.68952	94.9115	1.21501	0.0959918	-4.4318	4.49e-10	5.64681	5.97e-16
Smp_140770	426.419	0.387628	0.160504	2.41507	0.015732	0.148299	protein phosphatase 7	2	0.823076	-2.50004	1.67696	81.9702	1.20916	0.0784915	-4.3153	1.44e-10	5.52446	6.5e-17
Smp_012580	3119.36	-0.646933	0.25767	-2.51071	0.012049	0.119463	hypothetical protein	2	0.495766	-1.67126	1.17549	48.9096	1.20625	0.025035	-2.81257	6.21e-07	4.01882	2.62e-13
Smp_192400	900.448	-0.380886	0.150458	-2.53151	0.0113572	0.113929	hypothetical protein	2	0.609038	-2.02878	1.41975	59.7739	1.19404	0.0107906	-3.49722	1.42e-11	4.69126	2.57e-20
Smp_138630	876.861	-0.309533	0.250333	-1.23648	0.216279	0.754593	hypothetical protein	2	0.267939	-1.18976	0.921824	38.5759	1.18263	0.121892	-1.83564	0.0124044	3.01827	1.39e-05
Smp_024870	4142.64	-0.404764	0.322431	-1.25535	0.209352	0.749208	hypothetical protein	2	0.340931	-1.56591	1.22497	147.422	1.18037	0.0630388	-2.48481	3.23e-05	3.66518	2.55e-10
Smp_080860	890.114	1.32222	0.192019	6.88591	5.74e-12	6.76e-10	#N/A	2	0.83915	-2.31265	1.4735	110.314	1.15933	0.133953	-4.09455	5.67e-09	5.25387	2.58e-14
Smp_139810	7913.14	-0.0923721	0.173782	-0.531542	0.595044	0.994321	coiled coil domain containing protein 39	2	0.828253	-2.40947	1.58122	1176.16	1.15397	0.106938	-4.29961	3.27e-12	5.45358	2.68e-19
Smp_151020	595.384	0.567716	0.210338	2.69906	0.00695352	0.0762732	transmembrane protein 17	2	0.232417	-1.14717	0.914756	156.687	1.14261	0.0241092	-1.75742	0.000296896	2.90003	4.74e-10
Smp_071390	7011.46	-0.152422	0.149345	-1.0206	0.307444	0.853606	adenylate kinase	2	0.378088	-1.41213	1.03404	1687.25	1.1115	2.53e-05	-2.4278	6.6e-22	3.5393	3.44e-46
Smp_154020	514.112	-0.677331	0.151961	-4.45725	8.3e-06	0.000258583	ankyrin 2,3:unc44	2	0.627488	-1.853	1.22551	495.045	1.10744	0.0396465	-3.33632	6.13e-12	4.44376	1.1e-20
Smp_199090	887.678	-0.454648	0.166312	-2.73371	0.00626244	0.0699197	peptidyl glycine alpha amidating	2	0.813498	-2.25431	1.44081	198.535	1.10433	0.0231917	-4.09949	1.03e-17	5.20382	2.85e-28
Smp_157350	4089.84	0.253182	0.116981	2.1643	0.0304413	0.236195	serine:threonine protein kinase ULK2	2	0.269564	-1.28042	1.01086	86.7789	1.0827	0.0719237	-2.02129	0.000333095	3.10399	1.08e-08
Smp_015030	624.403	-0.294125	0.204476	-1.43844	0.150311	0.636011	ethanolamine kinase 1	2	0.70655	-2.06016	1.35361	155.403	1.08131	0.00341333	-3.73921	1.52e-20	4.82052	6.97e-34
Smp_149320	666.918	0.276672	0.128213	2.15791	0.0309351	0.239163	tricarboxylate transport protein	2	0.660636	-1.99483	1.33419	358.897	1.03805	0.00126622	-3.6357	9.94e-29	4.67374	2.25e-47
Smp_128920	372.916	0.75459	0.224518	3.36094	0.000776775	0.0127442	spectrin beta chain	2	0.995701	-2.60929	1.61359	39.0127	1.02535	0.114016	-4.41131	4.56e-09	5.43667	2.2e-13
Smp_078230	875.856	1.29293	0.165873	7.79473	6.45e-15	1.07e-12	cGMP dependent protein kinase, isozyme 2 forms	2	1.07329	-2.72568	1.65239	319.445	1.00279	0.122245	-5.08601	2.09e-18	6.0888	3.04e-26
Smp_200240	1642.46	-0.0423996	0.218661	-0.193906	0.84625	0.999981	universal stress protein	2	0.616709	-1.82947	1.21276	615.965	0.991432	0.00170841	-3.33454	1.53e-28	4.32598	5.93e-48
Smp_166960	4544.41	-0.392277	0.205983	-1.90442	0.0568559	0.363413	ubiquitin protein ligase BRE1	2	0.694112	-2.05394	1.35983	33.4849	0.986656	0.395887	-3.16522	0.00158153	4.15188	2.07e-05
Smp_199770	2334.2	-0.111982	0.203644	-0.549892	0.582394	0.991299	schwannomin interacting protein	2	0.414751	-1.46451	1.04975	168.029	0.982277	0.0721557	-2.50702	4.33e-07	3.4893	6e-13
Smp_168870	1921.87	0.760462	0.158788	4.78917	1.67e-06	6.5e-05	Rootletin	2	0.647015	-1.77992	1.13291	195.052	0.981739	0.175754	-3.1638	4.82e-07	4.14554	1.71e-11
Smp_004590	1017.85	0.274681	0.164912	1.66563	0.0957881	0.505688	hypothetical protein	2	0.784848	-2.15769	1.37284	139.711	0.974349	0.0995811	-3.86342	1.83e-12	4.83777	3.39e-19
Smp_043220	8773.03	-0.431209	0.201578	-2.13917	0.0324217	0.246243	hypothetical protein	2	0.306316	-1.21851	0.91219	1274.54	0.96426	0.000506424	-2.02832	1.05e-14	2.99258	2.59e-31
Smp_143530	1830.53	-0.105095	0.155245	-0.676966	0.498427	0.965738	#N/A	2	0.271136	-1.1693	0.898167	94.6361	0.912617	0.148247	-1.87921	0.00104156	2.79182	4.54e-07
Smp_126530	828.396	-0.100158	0.158682	-0.631189	0.527917	0.979383	v ets erythroblastosis virus E26 oncogene	2	0.636158	-1.84545	1.20929	48.8364	0.871672	0.130949	-3.2552	8.28e-09	4.12687	1.25e-13
Smp_020130	638.106	0.183999	0.122676	1.49988	0.133645	0.599971	hypothetical protein	2	1.19669	-2.87199	1.6753	90.6672	0.862546	0.41062	-4.88089	2.57e-08	5.74344	3.23e-11
Smp_141830	1675.71	-0.22283	0.224517	-0.992486	0.32096	0.865364	transcriptional enhancer factor tef	2	0.719705	-2.03484	1.31514	43.618	0.82959	0.510195	-3.09721	0.00246554	3.9268	8.43e-05
Smp_133600	8096.21	0.0754746	0.105318	0.716638	0.473597	0.955925	hypothetical protein	2	0.774024	-2.02743	1.2534	1161.2	0.828941	0.0300676	-3.85911	8.97e-30	4.68805	5.21e-44
Smp_182770	418.357	-0.229137	0.297253	-0.770847	0.440797	0.945278	hypothetical protein	2	0.756271	-1.97628	1.22001	458.181	0.827337	0.348763	-3.52937	8.5e-07	4.3567	6.44e-10
Smp_129610	158.307	-0.061917	0.191448	-0.323414	0.746381	0.999981	malate dehydrogenase	2	0.598231	-1.69765	1.09942	31.0665	0.811106	0.201118	-2.93668	3.06e-06	3.74778	1.58e-09
Smp_135010	915.878	0.32416	0.133691	2.42469	0.0153213	0.145063	oxalate:formate antiporter	2	0.322718	-1.16163	0.838916	395.35	0.805374	0.00997681	-2.00014	6.41e-12	2.80552	1.08e-22
Smp_124410	388.04	-0.190916	0.153631	-1.24269	0.213981	0.751787	fatty acid amide hydrolase	2	0.480307	-1.44425	0.96394	90.8135	0.804639	0.171498	-2.52035	3.03e-06	3.32499	3.68e-10
Smp_196250	11860.5	-0.374854	0.298662	-1.25511	0.209437	0.749208	supervillin	2	0.673091	-1.82233	1.14924	115.42	0.801837	0.28154	-3.22015	5.45e-07	4.02199	2.1e-10
Smp_147800	1775.18	-0.293278	0.187915	-1.56069	0.118596	0.57176	Lmp3 protein	2	1.42885	-3.26994	1.84109	83.3992	0.681063	0.385143	-5.73791	5.91e-14	6.41898	2.29e-17
Smp_156530	1526.55	-0.629583	0.231998	-2.71375	0.00665273	0.0736082	peptidylglycine alpha amidating monooxygenase	2	0.851823	-2.06512	1.2133	362.813	0.658209	0.289947	-3.8821	4.08e-14	4.54031	3.78e-19
Smp_124760	1959.75	-0.352015	0.119194	-2.9533	0.00314399	0.0400427	hypothetical protein	2	0.772767	-2.00862	1.23585	27.515	0.646431	0.53503	-3.3439	0.000123609	3.99033	3.64e-06
Smp_159990	1253.98	0.0624008	0.167906	0.371641	0.71016	0.999981	Voltage gated calcium channel, L type, alpha	2	0.904581	-2.17265	1.26807	211.955	0.638639	0.400163	-4.04648	3.5e-11	4.68512	8.74e-15
Smp_164630	1453.83	0.142195	0.171374	0.829735	0.406689	0.922135	protein sickie	2	1.01574	-2.32091	1.30517	36.8973	0.613401	0.587512	-3.96219	1.39e-05	4.57559	4.07e-07
Smp_210130	2035.73	-0.239648	0.166906	-1.43582	0.151052	0.636951	C Jun amino terminal kinase interacting protein	2	0.684533	-1.6776	0.993064	282.574	0.582766	0.433014	-3.07012	1.58e-07	3.65289	2.64e-10
Smp_124740	1427.07	0.221534	0.139638	1.58648	0.11263	0.555842	hypothetical protein	2	0.786585	-1.99808	1.21149	87.7176	0.580385	0.561219	-3.53579	4.94e-06	4.11617	7.68e-08
Smp_000160	1132.28	-0.162321	0.169746	-0.956259	0.338941	0.879345	matrix remodeling associated protein 5	2	0.802353	-1.99822	1.19587	105.053	0.578764	0.643135	-3.25283	0.000628326	3.8316	4.29e-05
Smp_139350	420.386	0.913594	0.341575	2.67465	0.00748078	0.0808519	hypothetical protein	2	0.617505	-1.51875	0.90124	47.9288	0.575633	0.574309	-2.6832	0.00095712	3.25884	4.52e-05
Smp_136620	406.679	-0.468617	0.320974	-1.45998	0.144295	0.623369	hypothetical protein	2	1.15816	-2.55909	1.40093	326.985	0.575028	0.434936	-4.88724	2.46e-16	5.46226	2.49e-20
Smp_022070	237.969	0.61555	0.19852	3.10069	0.00193071	0.0269453	hypothetical protein	2	0.691284	-1.61095	0.919667	74.9098	0.558524	0.175506	-3.10572	1.16e-14	3.66425	7e-20
Smp_140110	378.715	0.766314	0.145721	5.25878	1.45e-07	7.38e-06	primary ciliary dyskinesia protein 1	2	0.548317	-1.35432	0.806002	55.6198	0.557149	0.546496	-2.47043	0.000738528	3.02758	2.6e-05
Smp_138210	2054.75	-0.212342	0.174057	-1.21996	0.222481	0.765068	hypothetical protein	2	0.4872	-1.27571	0.788512	170.647	0.491378	0.491293	-2.34563	2.74e-05	2.83701	2.78e-07
Smp_151590	2273.7	-0.492972	0.169367	-2.91067	0.00360657	0.0449357	Centrosomal protein of 135 kDa (Cep135 protein)	2	0.574002	-1.61631	1.04231	34.2701	0.482028	0.654548	-2.73892	0.00119777	3.22095	0.00011763
Smp_000755	4455.77	-2.99897	0.202365	-14.8196	1.09e-49	1.57e-46	family M13 non peptidase ue (M13 family)	2	0.518707	-1.4607	0.941994	35.3774	0.447042	0.697131	-2.45828	0.00531321	2.90532	0.000825955
Smp_143520	326.73	-0.178561	0.19701	-0.906357	0.364747	0.897134	hypothetical protein	2	0.457939	-1.16748	0.709545	27.9434	0.441027	0.615932	-2.09808	0.00305024	2.53911	0.000300825
Smp_163810	849.015	0.00773736	0.192625	0.040168	0.967959	0.999981	laminin gamma 1 chain	2	0.960898	-2.31977	1.35888	39.7072	0.416464	0.725405	-3.88077	1.66e-05	4.29723	1.65e-06
Smp_203950	821.503	-0.0322254	0.162935	-0.197781	0.843216	0.999981	retinol dehydrogenase 11	2	0.784879	-1.85383	1.06895	159.845	0.411275	0.560057	-3.52922	8.59e-11	3.9405	2.93e-13
Smp_175930	2097.92	-0.240073	0.201865	-1.18928	0.234331	0.780672	ELAVprotein 2:3:4	2	1.39827	-3.06526	1.66698	54.0391	0.376144	0.804844	-4.45177	4.07e-05	4.82792	7.73e-06
Smp_169700	1505.87	-0.520076	0.245189	-2.12112	0.0339116	0.255016	lim domain and actin binding 1	2	0.592553	-1.32501	0.732455	65.1408	0.353949	0.665944	-2.49175	6.88e-05	2.8457	5.13e-06
Smp_148490	892.273	-0.120583	0.225788	-0.534055	0.593303	0.994058	kazrin	2	1.1529	-2.58202	1.42912	48.8214	0.351497	0.78789	-4.31536	5.03e-06	4.66686	7.22e-07
Smp_150490	840.941	-0.0740253	0.275841	-0.268362	0.788421	0.999981	hypothetical protein	2	0.584942	-1.23403	0.649084	56.1772	0.340023	0.719736	-2.30567	0.00120756	2.6457	0.00018534
Smp_143860	86.2792	0.60232	0.266635	2.25897	0.0238854	0.197635	hypothetical protein	2	0.682261	-1.39336	0.711104	22.3009	0.333658	0.680722	-2.66965	4.03e-05	3.00331	4.47e-06
Smp_157950	602.292	-0.0517176	0.139702	-0.3702	0.711233	0.999981	glycogenin	2	0.843372	-1.85569	1.01231	177.342	0.332834	0.464111	-3.65271	1.1e-22	3.98555	1.01e-26
Smp_140650	136.225	0.902579	0.23481	3.84387	0.000121111	0.00262264	hypothetical protein	2	0.631272	-1.41227	0.780996	90.5559	0.328601	0.688242	-2.66145	1.17e-05	2.99006	7.38e-07
Smp_138100	2703.53	-0.112193	0.188964	-0.593724	0.552697	0.985603	hypothetical protein	2	1.19657	-2.47923	1.28265	62.9204	0.310222	0.655686	-4.78533	6.22e-15	5.09556	8.67e-17
Smp_079420	2520.84	0.244101	0.111575	2.18777	0.028686	0.227013	ankyrin repeat domain containing protein 42	2	0.648447	-1.41143	0.762983	314.554	0.300259	0.551276	-2.77882	1.67e-13	3.07908	2.05e-16
Smp_134960	63.3435	-0.0718219	0.260844	-0.275344	0.783052	0.999981	peptide (allatostatin:somatostatin)	2	0.972487	-2.017	1.04451	54.2198	0.29789	0.54376	-4.04437	4.52e-18	4.34226	1.97e-20
Smp_126350	8212.63	-0.436219	0.173825	-2.50952	0.0120895	0.119464	NMDA type glutamate receptor 1	2	0.943477	-1.99403	1.05055	731.707	0.294164	0.693299	-3.88994	1.62e-13	4.18411	1.27e-15
Smp_157240	2726.45	0.500148	0.168949	2.96035	0.00307293	0.0393124	cyclin dependent kinase 1	2	0.773187	-1.68013	0.906942	267.924	0.286387	0.725689	-3.21726	2.61e-08	3.50364	1.07e-09
Smp_038960	4427.63	0.370523	0.121139	3.05868	0.00222318	0.0301938	lactate dehydrogenase protein	2	0.644162	-1.36723	0.723069	1408.88	0.278387	0.600317	-2.69538	3.02e-12	2.97376	8.24e-15
Smp_155450	2069.8	0.0900366	0.221287	0.406876	0.684099	0.999981	SH3 and multiple ankyrin repeat domains protein	2	0.922235	-1.97046	1.04822	61.621	0.275307	0.787962	-3.6512	6.64e-07	3.92651	8.66e-08
Smp_152180	8476.57	0.0476314	0.181369	0.262621	0.792843	0.999981	fad NAD binding oxidoreductases	2	0.633449	-1.35828	0.724828	245.673	0.262572	0.717133	-2.62148	3.9e-07	2.88405	1.98e-08
Smp_144590	7610.24	-0.0707695	0.179917	-0.393346	0.694064	0.999981	ras gtpase activating protein	2	0.579884	-1.26295	0.68307	208.17	0.257704	0.728246	-2.44277	4.07e-06	2.70048	3.09e-07
Smp_149720	2190.19	-0.105716	0.185504	-0.569886	0.568755	0.987995	hypothetical protein	2	0.918516	-2.00457	1.08605	228.938	0.24512	0.681366	-3.98523	1.34e-19	4.23035	4.98e-22
Smp_168730	1943.65	-0.222132	0.166164	-1.33683	0.181279	0.700746	carbonic anhydrase	2	0.810125	-1.68808	0.877952	275.409	0.240521	0.506387	-3.43522	2.15e-33	3.67574	6.9e-38
Smp_085540	138095	-0.048832	0.15954	-0.306081	0.759543	0.999981	myosin heavy chain	2	0.764389	-1.70137	0.936983	1340.25	0.223372	0.793681	-3.33492	6.79e-09	3.55829	4.7e-10
Smp_091460	20393.3	0.251007	0.121607	2.06409	0.0390096	0.28182	glutamine synthetase	2	0.729925	-1.57947	0.849544	1864.33	0.201199	0.689043	-3.16449	1.98e-19	3.36569	4.94e-22
Smp_153170	9096.71	-0.240325	0.109996	-2.18486	0.0288989	0.22793	striated muscle specific	2	0.723207	-1.5398	0.816588	53.899	0.192736	0.780818	-3.07402	1.18e-09	3.26675	1.27e-10
Smp_145890	2883.97	0.0197464	0.114454	0.172526	0.863024	0.999981	adamTS protein 3	2	0.828129	-1.83454	1.00641	81.9497	0.189255	0.866897	-3.43283	6.26e-06	3.62208	1.83e-06
Smp_163360	1293.6	-0.513978	0.31708	-1.62097	0.105024	0.53174	dystrophin	2	1.09471	-2.15051	1.0558	161.038	0.173187	0.864946	-4.19993	1.04e-09	4.37311	1.85e-10
Smp_125440	289.139	-0.133005	0.261003	-0.509593	0.610336	0.996858	FERM domain containing protein 5	2	0.844664	-1.66799	0.823322	70.2012	0.150613	0.907762	-3.06884	0.00040924	3.21945	0.000208691
Smp_166300	1540.83	-0.213445	0.14747	-1.44738	0.147792	0.630214	hypothetical protein	2	0.964624	-1.9532	0.988579	343.615	0.146142	0.791163	-3.99242	7.48e-26	4.13856	9.86e-28
Smp_164340	1576.59	-0.271046	0.119926	-2.26011	0.0238145	0.197239	Afadin	2	0.891648	-1.71069	0.819044	51.9732	0.132873	0.89285	-3.38854	5.97e-07	3.52141	2.52e-07
Smp_124930	2187.6	0.544181	0.13625	3.99399	6.5e-05	0.00157784	neuropilin (nrp) and tolloid (tll)	2	1.031	-2.07981	1.04882	53.1824	0.127713	0.908341	-3.90528	2.5e-07	4.03299	1.09e-07
Smp_155050	5033.7	-0.361602	0.242398	-1.49177	0.135759	0.603877	agrin	2	0.904402	-1.7374	0.832995	129.896	0.0955721	0.90735	-3.5068	7.8e-11	3.60237	2.39e-11
Smp_159590	913.285	0.0216227	0.21028	0.102828	0.918099	0.999981	hypothetical protein	2	0.804728	-1.60805	0.803324	124.794	0.0675188	0.937115	-3.20685	4.53e-09	3.27437	2.29e-09
Smp_157010	1273.64	-0.00933397	0.208922	-0.0446768	0.964365	0.999981	titin	2	0.720415	-1.50952	0.789105	18.5736	0.0377611	0.97836	-2.81625	0.000367429	2.85402	0.00038088
Smp_142490	1265.81	-0.0258556	0.140742	-0.183709	0.854242	0.999981	Transmembrane protein 45B	2	0.906372	-1.62549	0.719119	48.2405	0.00482485	0.999193	-3.30421	8.04e-10	3.30903	1.62e-09
Smp_123050	763.783	0.40593	0.185012	2.19408	0.0282296	0.223883	Regulator of G protein signaling 20	2	1.30971	-2.58007	1.27036	37.0204	-0.00639923	1	-4.43381	2.54e-06	4.42741	2.95e-06
Smp_156150	1301.52	-0.127667	0.161751	-0.789283	0.429947	0.940541	small conductance calcium activated potassium	2	0.969623	-1.84629	0.876668	33.7742	-0.0129264	0.994571	-3.64306	3.07e-07	3.63014	4.55e-07
Smp_157380	1981.75	-0.85141	0.230072	-3.70062	0.000215075	0.0043302	hypothetical protein	2	0.964058	-1.91115	0.947091	81.2586	-0.0236775	0.984934	-3.77111	1.69e-09	3.74743	2.64e-09
Smp_165890	286.735	0.132165	0.283915	0.465508	0.641568	0.999907	rab6 interacting protein 2:elks:erc:cast	2	0.89497	-1.7768	0.881829	27.6572	-0.029905	0.985909	-3.32906	6.71e-05	3.29915	9.5e-05
Smp_017610	4090.51	-0.0359242	0.249028	-0.144257	0.885297	0.999981	amiloride sensitive amine oxidase	2	1.04707	-1.85196	0.804881	26.9574	-0.0335788	0.983219	-3.56827	2.04e-05	3.53469	2.89e-05
Smp_161210	755.352	-0.383886	0.15937	-2.40878	0.0160061	0.14957	hypothetical protein	2	1.82359	-3.35121	1.52763	29.9188	-0.0638879	0.96431	-5.313	3.94e-08	5.24912	6.95e-08
Smp_114540	2641.45	0.0323261	0.199892	0.161718	0.871528	0.999981	hypothetical protein	2	0.76753	-1.38332	0.615789	22.349	-0.071275	0.94972	-2.73198	0.000192768	2.6607	0.000390315
Smp_045550	3901.55	-0.947428	0.282604	-3.3525	0.000800864	0.0131058	annexin	2	1.24357	-2.37806	1.13449	87.9614	-0.108313	0.914408	-4.61422	5.38e-11	4.5059	1.82e-10
Smp_165380	43.0823	0.0427664	0.333924	0.128072	0.898092	0.999981	rabphilin	2	0.894709	-1.40015	0.505436	26.102	-0.116331	0.938501	-2.62952	0.0092215	2.51318	0.0139498
Smp_016600	3222.42	0.219353	0.144347	1.51963	0.128605	0.589771	solute carrier family 1	2	1.11722	-1.94571	0.828495	198.154	-0.137346	0.880301	-4.0742	8.45e-12	3.93686	4.43e-11
Smp_056560	263.507	-0.291517	0.252962	-1.15241	0.249151	0.795769	cyclic nucleotide gated cation channel	2	1.04924	-1.94721	0.897962	31.5299	-0.144023	0.903166	-3.68866	6.65e-06	3.54463	1.95e-05
Smp_143800	1432.43	-0.295618	0.14785	-1.99944	0.0455605	0.313708	sodium:chloride dependent neurotransmitter	2	1.21953	-2.38546	1.16593	19.7174	-0.148292	0.904939	-4.20794	3.27e-06	4.05965	9.76e-06
Smp_159360	684.728	-0.288208	0.227371	-1.26756	0.204954	0.742515	growth arrest specific 2	2	0.909982	-1.7039	0.793914	108.457	-0.152545	0.872867	-3.41518	6.98e-08	3.26264	3.31e-07
Smp_163570	12768.7	-0.0579559	0.115408	-0.502182	0.615539	0.996858	Ryanodine receptor	2	0.869034	-1.64513	0.776096	75.9547	-0.164365	0.806323	-3.42883	5.98e-13	3.26446	1.27e-11
Smp_172040	943.725	0.0798241	0.136309	0.585611	0.558137	0.985603	protein unc 13 B	2	1.05758	-1.69385	0.63627	58.7254	-0.164944	0.885307	-3.4473	6.65e-06	3.28236	2.22e-05
Smp_151430	249.717	-0.121709	0.169767	-0.716917	0.473425	0.955925	protein piccolo	2	0.844004	-1.23375	0.389746	29.6205	-0.188701	0.880221	-2.59747	0.00267285	2.40877	0.00636778
Smp_164380	2532.85	0.26144	0.11186	2.3372	0.0194287	0.169745	protein KINase family member (kin 1)	2	1.21569	-2.18907	0.973381	137.566	-0.212284	0.762599	-4.60006	2.11e-19	4.38778	1.13e-17
Smp_154760	16178.4	-0.0536269	0.140714	-0.381105	0.703125	0.999981	egf domain protein	2	0.956016	-1.72628	0.770266	96.5105	-0.212406	0.775984	-3.61398	6.32e-12	3.40158	1.46e-10
Smp_070020	4794.58	-0.0874432	0.174857	-0.500085	0.617015	0.996858	rhoptry associated membrane antigen	2	1.148	-1.9809	0.832893	162.15	-0.263263	0.805354	-4.01537	4.14e-08	3.75211	3.61e-07
Smp_157020	60.9801	0.316758	0.341581	0.927327	0.353757	0.893958	titin	2	0.903704	-1.71455	0.810847	38.8603	-0.266061	0.799842	-3.41185	5.02e-06	3.14579	3.56e-05
Smp_021920	10407.6	-0.193056	0.156127	-1.23654	0.21626	0.754593	paramyosin	2	1.02996	-1.86609	0.836129	260.068	-0.267537	0.732764	-3.90838	1.12e-12	3.64084	3.97e-11
Smp_141070	1086.52	-0.030155	0.191743	-0.157268	0.875034	0.999981	glutamate receptor interacting protein 1	2	0.888445	-1.61793	0.729485	23.6215	-0.275138	0.840328	-2.92332	0.00261031	2.64819	0.0076908
Smp_156500	1299	-0.107906	0.138918	-0.776761	0.4373	0.943176	rap guanine nucleotide exchange factor 1	2	1.00879	-1.65992	0.651127	67.6937	-0.275244	0.790536	-3.41567	2.99e-06	3.14043	2.29e-05
Smp_001780	1354.71	0.281304	0.226561	1.24163	0.214375	0.751787	hypothetical protein	2	0.923798	-1.60111	0.677312	32.6874	-0.278925	0.739429	-3.27575	2.29e-07	2.99683	4.08e-06
Smp_194420	4294.66	-0.157589	0.136361	-1.15568	0.247813	0.79547	hypothetical protein	2	1.39024	-2.58524	1.19499	21.3776	-0.286564	0.824015	-4.45349	3.89e-06	4.16693	2.12e-05
Smp_082360	12194.6	-0.107861	0.380045	-0.283812	0.776555	0.999981	protein tyrosine kinase	2	1.08543	-1.86702	0.781588	70.4129	-0.307961	0.798938	-3.59859	2.44e-05	3.29063	0.000143555
Smp_180500	56.769	-0.435768	0.264999	-1.64441	0.100091	0.518677	phospholipid scramblase	2	0.779766	-1.23788	0.458113	20.407	-0.323843	0.751356	-2.58314	0.000675743	2.2593	0.00428589
Smp_161450	650.587	-0.175848	0.184483	-0.95319	0.340494	0.881163	small conductance calcium activated potassium	2	0.872262	-1.33617	0.463904	226.429	-0.342323	0.765785	-2.78312	0.000640927	2.4408	0.0032517
Smp_152380	158.734	0.146145	0.178512	0.818684	0.412967	0.925757	hypothetical protein	2	1.38598	-2.29728	0.911302	90.0242	-0.34531	0.770728	-4.49731	7.54e-08	4.152	8.6e-07
Smp_161640	262.419	0.0367696	0.184506	0.199287	0.842039	0.999981	transient receptor potential cation channel	2	1.04085	-1.51466	0.47381	24.1835	-0.348811	0.73278	-3.16419	4.87e-05	2.81538	0.000480331
Smp_170150	3892.23	-0.410447	0.619898	-0.662119	0.507895	0.970086	hypothetical protein	2	0.784956	-1.30715	0.522196	69.6382	-0.357646	0.702958	-2.67365	0.000108621	2.31601	0.00110114
Smp_162230	9979.66	-0.318466	0.201909	-1.57727	0.114733	0.561389	microtubule associated protein tau	2	0.728477	-1.19946	0.470987	587.076	-0.357765	0.66758	-2.51767	3.76e-05	2.15991	0.000513138
Smp_152390	42.728	0.504842	0.322776	1.56406	0.117803	0.571199	hypothetical protein	2	1.10956	-1.70409	0.594534	25.8691	-0.357863	0.758062	-3.40389	7.4e-05	3.04603	0.000551685
Smp_047650	2883.56	0.30823	0.219533	1.40403	0.16031	0.657138	Ferritin-2 heavy chain	2	1.03185	-1.72481	0.692958	115.207	-0.35911	0.447042	-3.73101	4.26e-21	3.3719	5.91e-17
Smp_003110	21036.1	0.336953	0.192195	1.75318	0.0795714	0.45303	Nadrin protein	2	0.978895	-1.60934	0.630444	34.3826	-0.371969	0.715053	-3.32597	1.19e-05	2.954	0.000145815
Smp_136540	797.42	-0.209657	0.20133	-1.04136	0.297709	0.843959	DNAJ	2	1.06286	-1.74122	0.678358	160.433	-0.386145	0.566885	-3.77221	1.55e-13	3.38607	5.23e-11
Smp_194740	97.6035	0.0657393	0.261274	0.251611	0.801342	0.999981	G protein coupled receptor fragment	2	1.30248	-2.2363	0.933818	82.413	-0.414525	0.746744	-4.24572	3.53e-06	3.83119	3.55e-05
Smp_000780	496.804	-0.00110493	0.190215	-0.00580883	0.995365	0.999981	#N/A	2	1.07285	-1.69517	0.622319	48.0229	-0.424403	0.63831	-3.53693	3.87e-07	3.11253	1.31e-05
Smp_134430	3461.88	-0.100106	0.127717	-0.783812	0.433151	0.941517	#N/A	2	0.967575	-1.50642	0.538846	80.9019	-0.42824	0.600317	-3.24494	1.93e-07	2.8167	1e-05
Smp_151620	4294.57	0.0151768	0.162023	0.0936705	0.925371	0.999981	protocadherin 9	2	1.52317	-2.68468	1.16151	35.8067	-0.452309	0.632334	-5.01397	8.41e-10	4.56166	3.9e-08
Smp_125280	316.794	0.621829	0.190574	3.26293	0.00110266	0.0171421	F box only protein 16	2	1.1155	-1.75472	0.639217	36.8943	-0.453546	0.623225	-3.65983	3.84e-07	3.20628	1.42e-05
Smp_005720	8400.65	-0.389441	0.104341	-3.73239	0.00018967	0.00383669	Aquaporin 3 (AQP 3)	2	0.908333	-1.57013	0.6618	785.38	-0.460308	0.556412	-3.26298	2.14e-08	2.80267	2.04e-06
Smp_166030	32291.4	-0.0311885	0.258765	-0.120528	0.904065	0.999981	erythrocyte membrane protein	2	0.808017	-1.20848	0.400461	1078.25	-0.486347	0.523841	-2.65814	4.35e-06	2.17179	0.000235208
Smp_170430	408.843	0.384123	0.22192	1.73091	0.0834681	0.466564	D aspartate oxidase	2	1.01787	-1.49746	0.479585	24.7925	-0.521187	0.483229	-3.23221	2.29e-07	2.71102	3.54e-05
Smp_084090	3704.37	-0.0479805	0.133122	-0.360424	0.71853	0.999981	hypothetical protein	2	1.50033	-2.54547	1.04514	34.398	-0.52503	0.561571	-4.99962	2.41e-10	4.47459	2.54e-08
Smp_140000	1214.13	-0.444235	0.156854	-2.83215	0.0046236	0.055207	tetraspanin CD63 receptor	2	1.12518	-1.79013	0.664946	295.118	-0.552804	0.209199	-3.98325	1.19e-26	3.43044	8.21e-20
Smp_059170	8464.89	-0.105952	0.14139	-0.74936	0.453641	0.949958	troponin i	2	1.12451	-1.7192	0.594689	24.7031	-0.562033	0.593197	-3.54596	1.96e-05	2.98392	0.000512534
Smp_136480	493.144	-0.105541	0.16723	-0.63111	0.527969	0.979383	CCAAT box DNA binding protein subunit B	2	1.26711	-2.11678	0.84967	197.053	-0.584469	0.4909	-4.45311	8.08e-12	3.86865	3.95e-09
Smp_180760	1503.28	-0.109025	0.156127	-0.698311	0.484983	0.958515	neurexin	2	1.46952	-2.24055	0.771029	28.2487	-0.602893	0.529922	-4.46851	6.2e-08	3.86561	5.33e-06
Smp_193120	1452.23	0.0398939	0.192655	0.207075	0.835952	0.999981	myosin heavy chain	2	1.01961	-1.64994	0.630334	18.9075	-0.617068	0.585343	-3.28203	0.000257787	2.66496	0.00444104
Smp_038440	1233.77	0.0771496	0.188034	0.410296	0.681589	0.999981	heart specific myosin light chain phosphatase	2	1.31853	-2.14923	0.830704	63.1514	-0.622111	0.547026	-4.38597	5.19e-08	3.76386	4.5e-06
Smp_030440	471.579	0.265248	0.247495	1.07173	0.283842	0.831844	hypothetical protein	2	1.05767	-1.50661	0.44894	150.235	-0.624849	0.326652	-3.41335	7.1e-11	2.7885	1.97e-07
Smp_031300	868.042	-0.23856	0.124115	-1.92209	0.0545949	0.354764	universal stress protein	2	1.3143	-2.08673	0.772429	319.845	-0.636862	0.0848165	-4.67176	2.28e-40	4.0349	9.69e-30
Smp_168140	773.825	-0.163693	0.206885	-0.791228	0.428811	0.940429	hypothetical protein	2	1.04917	-1.59899	0.549821	45.9264	-0.677931	0.267651	-3.49157	1.74e-10	2.81364	8.52e-07
Smp_122900	1547.99	-0.0423496	0.136991	-0.309141	0.757214	0.999981	beta arrestin	2	1.16147	-1.76573	0.604261	179.134	-0.744713	0.174063	-3.97112	4.36e-17	3.22641	1.96e-11
Smp_179810	84662	0.0961526	0.166528	0.577397	0.563671	0.986826	oncosphere protein tso22e	2	1.10546	-1.61919	0.513732	494.488	-0.755677	0.0713186	-3.77953	3.23e-25	3.02385	2.07e-16
Smp_137150	793.745	-0.146178	0.196757	-0.742937	0.45752	0.95055	beta mannosidase	#N/A	#N/A	#N/A	#N/A	13.4284	3.96282	0.000557483	-1.78756	0.212033	5.75039	1.13e-06
Smp_074460	4540.59	-0.277	0.192929	-1.43576	0.151069	0.636951	tegument-allergen-like protein	#N/A	#N/A	#N/A	#N/A	18.5346	3.93347	8.59e-05	-2.48697	0.0496889	6.42043	6.25e-09
Smp_167270	358.979	-1.19591	0.224399	-5.3294	9.85e-08	5.23e-06	hypothetical protein	#N/A	#N/A	#N/A	#N/A	32.1922	3.9063	1.5e-07	-0.97105	0.346507	4.87735	3.47e-10
Smp_152050	1181.28	-0.606146	0.166564	-3.63912	0.000273571	0.00527329	tetraspanin similiar to uroplakin 1	#N/A	#N/A	#N/A	#N/A	12.5259	3.89157	2.55e-05	-0.0291372	0.990321	3.92071	1.96e-05
Smp_195090	1134.7	-1.46913	0.305955	-4.80179	1.57e-06	6.17e-05	tegument-allergen-like protein	#N/A	#N/A	#N/A	#N/A	18.3665	3.83488	1.37e-05	-0.631431	0.632708	4.46631	6.67e-07
Smp_152970	2187.59	-0.126283	0.220236	-0.5734	0.566374	0.987451	hypothetical protein	#N/A	#N/A	#N/A	#N/A	7.5903	3.80665	2.53e-05	-0.992341	0.470841	4.79899	9.42e-07
Smp_149710	38.739	-1.94659	0.333919	-5.82951	5.56e-09	3.79e-07	hypothetical protein	#N/A	#N/A	#N/A	#N/A	5.95793	3.79395	0.00220944	-1.26672	0.441417	5.06067	5.51e-05
Smp_025370	2228.78	-0.443014	0.172347	-2.57048	0.0101558	0.103447	lipopolysaccharide induced	#N/A	#N/A	#N/A	#N/A	28.359	3.7628	2.73e-07	-0.670389	0.543392	4.43319	4.84e-09
Smp_154180	1342.23	-0.856041	0.21884	-3.91172	9.16e-05	0.00207876	25 kDa integral membrane protein	#N/A	#N/A	#N/A	#N/A	14.0084	3.75445	3.89e-06	-2.49178	0.040457	6.24623	2.16e-09
Smp_137700	152.404	0.243149	0.389011	0.625042	0.531943	0.981345	Zinc finger, C2H2 type domain containing protein	#N/A	#N/A	#N/A	#N/A	13.506	3.75096	1.86e-05	0.547181	0.664663	3.20378	0.000186343
Smp_005960	335.883	-0.977104	0.185535	-5.26641	1.39e-07	7.12e-06	hypothetical protein	#N/A	#N/A	#N/A	#N/A	14.1657	3.72201	0.000746827	-2.09873	0.127595	5.82074	6.4e-07
Smp_028840	416.031	-0.826353	0.188513	-4.38354	1.17e-05	0.000343561	hypothetical protein	#N/A	#N/A	#N/A	#N/A	15.7788	3.71177	7.84e-06	-0.742042	0.558759	4.45381	3.24e-07
Smp_159650	312.63	-0.138828	0.387963	-0.35784	0.720463	0.999981	N methyl D aspartate receptor associated	#N/A	#N/A	#N/A	#N/A	2.83189	3.70155	0.00740629	1.28652	0.443473	2.41503	0.0815788
Smp_163750	1437.5	-0.343667	0.59656	-0.576082	0.56456	0.986826	otoferlin	#N/A	#N/A	#N/A	#N/A	6.29797	3.69584	0.00830818	0	1	3.67978	0.00753162
Smp_085010	5021.39	-0.153797	0.28249	-0.544433	0.586143	0.991944	cathepsin B peptidase (C01 family)	#N/A	#N/A	#N/A	#N/A	24.1481	3.56546	3.07e-06	-1.04824	0.304171	4.6137	5.36e-09
Smp_059480	2779.11	-0.715422	0.181612	-3.93929	8.17e-05	0.00187853	thioredoxin peroxidase	#N/A	#N/A	#N/A	#N/A	31.6443	3.52381	3.5e-05	0.941184	0.373858	2.58262	0.00227615
Smp_077610	316.765	-0.290189	0.298161	-0.973262	0.330423	0.871384	hypothetical protein	#N/A	#N/A	#N/A	#N/A	6.53866	3.51051	0.00116334	-0.471331	0.779046	3.98184	0.000246571
Smp_005740	2045.59	-0.26668	0.170538	-1.56375	0.117876	0.571199	Aquaporin 9 (AQP 9) (Small solute channel 1)	#N/A	#N/A	#N/A	#N/A	35.9774	3.47676	8.33e-09	-1.30345	0.125472	4.7802	2.19e-12
Smp_152890	1358.01	-0.453042	0.184066	-2.4613	0.0138435	0.133572	hypothetical protein	#N/A	#N/A	#N/A	#N/A	24.6986	3.45208	2.62e-05	-2.15433	0.0441569	5.60641	1.58e-09
Smp_105730	354.247	-0.582204	0.150812	-3.86046	0.000113172	0.00248835	CAI 2 protein	#N/A	#N/A	#N/A	#N/A	2.88345	3.39608	0.0171688	0	1	3.39053	0.015294
Smp_039620	45.076	-1.47482	0.322017	-4.57995	4.65e-06	0.00015558	lysosome associated membrane glycoprotein	#N/A	#N/A	#N/A	#N/A	9.23702	3.37563	0.00260396	-1.45821	0.312029	4.83384	2.79e-05
Smp_025380	1745.46	-0.523741	0.134559	-3.89229	9.93e-05	0.00222902	16 kda calcium binding protein	#N/A	#N/A	#N/A	#N/A	28.1942	3.33187	3.18e-06	-0.161404	0.895885	3.49327	9.5e-07
Smp_173290	69.2393	-0.16919	0.295818	-0.571939	0.567363	0.987504	annexin	#N/A	#N/A	#N/A	#N/A	4.85826	3.32804	0.014659	0.185106	0.931029	3.14293	0.0190672
Smp_074560	4005.71	-0.682129	0.136193	-5.00856	5.48e-07	2.44e-05	hypothetical protein	#N/A	#N/A	#N/A	#N/A	26.4636	3.30338	2.42e-05	-0.721251	0.512529	4.02463	4.07e-07
Smp_042150	123.132	-1.10078	0.351907	-3.12805	0.00175969	0.0249905	tegument-allergen-like protein	#N/A	#N/A	#N/A	#N/A	6.75368	3.29154	0.00421893	0.526267	0.752041	2.76527	0.0138687
Smp_077850	1107.77	-0.557314	0.258968	-2.15206	0.0313927	0.241702	actin	#N/A	#N/A	#N/A	#N/A	36.1105	3.28804	5.36e-06	-1.51619	0.126764	4.80422	3.38e-09
Smp_016490	7430.23	-0.390783	0.231596	-1.68734	0.0915371	0.492321	Saposin B domain containing protein	#N/A	#N/A	#N/A	#N/A	18.9673	3.28448	1.84e-06	-0.28763	0.797729	3.57211	2.42e-07
Smp_140720	224.701	-0.640163	0.284588	-2.24944	0.0244848	0.200281	hypothetical protein	#N/A	#N/A	#N/A	#N/A	4.75635	3.28021	0.01073	0.78902	0.642899	2.49119	0.0495049
Smp_149870	78.7135	0.541761	0.304948	1.77656	0.0756399	0.438191	cat eye syndrome critical region protein	#N/A	#N/A	#N/A	#N/A	2.29045	3.27999	0.0261561	0	1	3.2882	0.0227099
Smp_175790	71.9263	-0.778608	0.540396	-1.44081	0.149639	0.634967	phospholipid translocating ATPase	#N/A	#N/A	#N/A	#N/A	6.17315	3.24658	0.0167383	0.050895	0.985464	3.19569	0.0163641
Smp_206290	169.248	-0.666251	0.182017	-3.66038	0.00025184	0.00493182	synaptotagmin protein 5 like	#N/A	#N/A	#N/A	#N/A	18.5235	3.23968	1.04e-05	1.64912	0.0385334	1.59056	0.0274528
Smp_075390	192.052	-0.027607	0.354128	-0.0779579	0.937862	0.999981	hypothetical protein	#N/A	#N/A	#N/A	#N/A	4.8592	3.23468	0.0248594	-0.254166	0.90744	3.48885	0.0128586
Smp_204810	1247.12	-0.232847	0.209555	-1.11115	0.266505	0.814483	hypothetical protein	#N/A	#N/A	#N/A	#N/A	6.73533	3.23273	0.0096755	0.238263	0.903951	2.99447	0.0149755
Smp_149400	63.7584	-0.975116	0.288771	-3.37678	0.000733401	0.0121251	subfamily S8B unassigned peptidase (S08 family)	#N/A	#N/A	#N/A	#N/A	21.3472	3.2053	0.00802838	0.0736869	0.973989	3.13161	0.00847236
Smp_179170	4002.4	-0.122861	0.369806	-0.33223	0.739716	0.999981	hemoglobinase (C13 family)	#N/A	#N/A	#N/A	#N/A	19.0009	3.20299	0.00327449	-0.227105	0.895262	3.43009	0.00135442
Smp_135490	1790.5	-0.417596	0.198997	-2.0985	0.0358607	0.26669	multidrug and toxin extrusion protein 1	#N/A	#N/A	#N/A	#N/A	23.4677	3.19301	0.000214137	-0.870644	0.461436	4.06365	3.95e-06
Smp_135580	103.494	-0.37865	0.243089	-1.55766	0.119314	0.57176	hypothetical protein	#N/A	#N/A	#N/A	#N/A	4.22784	3.17226	0.0202598	-1.1584	0.502981	4.33066	0.00114031
Smp_143940	61.8697	4.11886	0.472034	8.72575	2.64e-18	6.14e-16	Dynein intermediate chain	#N/A	#N/A	#N/A	#N/A	10.9332	3.13868	0.0162686	0.76946	0.653283	2.36921	0.0681266
Smp_051400	204.79	-1.43821	0.282434	-5.09221	3.54e-07	1.62e-05	dynein light chain	#N/A	#N/A	#N/A	#N/A	17.3392	3.1309	0.00041662	-1.43921	0.232601	4.57012	2.36e-06
Smp_135970	1658.06	-0.519984	0.218177	-2.38331	0.0171576	0.155759	calcium binding protein cml	#N/A	#N/A	#N/A	#N/A	9.17753	3.12618	0.000411484	-1.57654	0.205498	4.70272	2.72e-06
Smp_161220	484.162	-0.791666	0.14245	-5.55749	2.74e-08	1.59e-06	adipocyte plasma membrane associated protein	#N/A	#N/A	#N/A	#N/A	13.3289	3.12057	0.00185061	0.684074	0.613546	2.43649	0.0131373
Smp_015100	112.544	-1.09519	0.218756	-5.00642	5.55e-07	2.46e-05	hypothetical protein	#N/A	#N/A	#N/A	#N/A	3.64425	3.12041	0.0270974	-0.599977	0.759872	3.72039	0.00657731
Smp_152940	921.849	0.229288	0.124185	1.84634	0.0648432	0.397616	otopetrin	#N/A	#N/A	#N/A	#N/A	20.8127	3.09205	5.62e-07	-3.11293	0.000636272	6.20499	1.3e-13
Smp_010660	222.229	-0.452466	0.180756	-2.50318	0.0123083	0.12093	#N/A	#N/A	#N/A	#N/A	#N/A	25.9069	3.04881	0.000187817	-0.101213	0.941275	3.15003	9.59e-05
Smp_150770	3354.64	-0.0635553	0.135078	-0.470506	0.637993	0.999328	teneurin	4	0.0546728	-0.926394	0.871722	158.771	1.34008	0.149915	-1.16603	0.21811	2.50611	0.00270365
Smp_091660	1523.91	-0.289279	0.173099	-1.67117	0.0946872	0.504041	hypothetical protein	4	0.0445983	-0.81471	0.770111	149.386	1.32882	0.00108905	-1.06064	0.0117771	2.38946	7.36e-10
Smp_191010	3610.65	-0.0769249	0.27601	-0.278703	0.780472	0.999981	clathrin heavy chain	4	-0.103501	-0.735317	0.838818	106.553	1.32845	0.177693	-0.667062	0.554393	1.99552	0.0270822
Smp_149050	2514.18	-0.0896063	0.129791	-0.690386	0.489951	0.960354	XTP3 transactivated gene B protein	4	-0.0676235	-0.708307	0.775931	452.013	1.3182	0.00011971	-0.798871	0.027648	2.11707	1.08e-10
Smp_071970	3452.51	-0.152434	0.121262	-1.25706	0.208731	0.749208	chloride channel protein 3	4	0.177051	-1.04104	0.863989	178.585	1.28463	0.000903031	-1.56536	4.88e-05	2.84999	1.01e-14
Smp_001040	12093.2	-0.133915	0.234805	-0.570321	0.56846	0.987995	kinesin heavy chain	4	0.0851625	-0.972669	0.887507	1715.28	1.27375	0.0412641	-1.34329	0.0274821	2.61704	3.57e-06
Smp_163000	1062.45	-0.0843263	0.209318	-0.402863	0.687049	0.999981	hypothetical protein	4	-0.12731	-0.562264	0.689574	210.002	1.27363	0.000341997	-0.482647	0.240504	1.75627	3.11e-07
Smp_064190	1166.45	-0.186909	0.194194	-0.962489	0.335804	0.87748	type II inositol 1,4,5 trisphosphate	4	-0.0446084	-0.66183	0.706439	180.79	1.27217	0.039947	-0.710317	0.298126	1.98249	0.000595872
Smp_137020	2724.91	-0.461029	0.200818	-2.29575	0.0216903	0.184443	phosphatidylinositol transfer protein alpha	4	0.0707022	-0.993747	0.923045	34.6515	1.26439	0.0913071	-1.26336	0.097239	2.52775	0.000251258
Smp_059790	15642.1	-0.0348123	0.125963	-0.276369	0.782265	0.999981	transketolase	4	-0.0592275	-0.666354	0.725581	4046.57	1.25975	0.000914775	-0.726128	0.0729368	1.98588	3.42e-08
Smp_055870	7848.41	-0.384722	0.192754	-1.99592	0.0459422	0.314713	vesicleassociated membrane protein	4	0.0375392	-0.838297	0.800757	30.1554	1.24449	0.0908238	-1.06081	0.169101	2.30529	0.00076672
Smp_032310	2094.53	-0.0800499	0.170733	-0.468859	0.63917	0.999328	arp2:3 complex 21 kda subunit	4	-0.120367	-0.512582	0.632949	619.435	1.24237	0.00292961	-0.41141	0.411981	1.65377	3.56e-05
Smp_212160	1382.96	0.00964915	0.176532	0.0546594	0.95641	0.999981	hypothetical protein	4	0.161777	-0.950393	0.788616	48.0311	1.24042	0.133644	-1.33781	0.102832	2.57823	0.000548513
Smp_136700	123.718	-0.17317	0.316903	-0.546444	0.584761	0.991299	hypothetical protein	4	-0.0737304	-0.58038	0.65411	195.492	1.23605	0.000922594	-0.556118	0.185108	1.79217	5.76e-07
Smp_160460	6941.47	-0.250314	0.193941	-1.29067	0.196817	0.730585	zinc finger protein 541	4	-0.114312	-0.407274	0.521586	251.891	1.23431	0.0353422	-0.272682	0.724614	1.507	0.00722375
Smp_061940	3735.29	-0.223064	0.18697	-1.19305	0.232852	0.780242	adenylate kinase	4	-0.169303	-0.355338	0.52464	857.359	1.23008	0.00183885	-0.140481	0.807235	1.37056	0.000378656
Smp_121880	694.479	-0.165921	0.135279	-1.2265	0.22001	0.761418	hypothetical protein	4	-0.155535	-0.393191	0.548726	417.051	1.22858	4.86e-07	-0.20155	0.53637	1.43013	2.31e-09
Smp_125070	1777.59	0.302577	0.214234	1.41237	0.157842	0.652773	cystathionine beta synthase	4	-0.189883	-0.519558	0.709442	44.8046	1.22493	0.0715776	-0.398678	0.637488	1.62361	0.011709
Smp_900000	116653	-0.0413347	0.324269	-0.12747	0.898568	0.999981	cytochrome c oxidase subunit I	4	-0.163292	-0.347895	0.511187	4272.61	1.22487	0.0152844	-0.125434	0.86628	1.35031	0.00583077
Smp_210910	998.117	-0.291188	0.147704	-1.97143	0.0486742	0.327427	#N/A	4	0.0640459	-0.727409	0.663363	35.0876	1.22307	0.0461495	-0.951047	0.144395	2.17411	0.000168251
Smp_033620	1062.88	-0.0425614	0.209908	-0.202763	0.839321	0.999981	hypothetical protein	4	-0.113924	-0.525701	0.639625	266.484	1.22153	0.00145918	-0.448758	0.318823	1.67028	6.09e-06
Smp_056760	12857.2	-0.0753708	0.116807	-0.645259	0.518759	0.975212	protein disulfide isomerase	4	-0.11303	-0.515605	0.628635	5780.72	1.21899	4.73e-11	-0.443131	0.0293608	1.66212	3.24e-20
Smp_213720	1295.11	-0.105271	0.139889	-0.752532	0.451731	0.949389	kynurenine oxoglutarate transaminase 3	4	-0.0833545	-0.418712	0.502067	67.1428	1.21864	0.0451372	-0.321638	0.680027	1.54028	0.00795996
Smp_900090	154397	0.130153	0.320478	0.406123	0.684652	0.999981	NADH dehydrogenase subunit 4	4	-0.136038	-0.420744	0.556782	5242.26	1.21572	0.000494186	-0.266776	0.554326	1.4825	1.14e-05
Smp_154040	4726.15	0.0809666	0.133947	0.604469	0.545532	0.985603	sugar nucleotide epimerase	4	-0.166352	-0.45079	0.617141	526.557	1.20591	1.87e-06	-0.287271	0.356642	1.49318	1.46e-09
Smp_138990	2685.6	-0.366727	0.13807	-2.6561	0.00790512	0.0844166	#N/A	4	-0.146281	-0.510916	0.657197	228.364	1.20494	0.0361012	-0.407227	0.562113	1.61217	0.00309088
Smp_133790	1273.31	-0.290115	0.213896	-1.35634	0.174992	0.68978	small g protein signaling modulator 3	4	0.064547	-0.905356	0.840809	291.122	1.20486	0.0226559	-1.19338	0.0228829	2.39823	7.87e-07
Smp_154420	19409.2	-0.183135	0.170897	-1.07161	0.283893	0.831844	clathrin heavy chain	4	-0.0436931	-0.671377	0.71507	893.223	1.20089	0.0526784	-0.730388	0.276698	1.93128	0.000749096
Smp_019340	3028.03	-0.154691	0.13815	-1.11973	0.262828	0.813644	Tetraspanin 3	4	-0.174343	-0.399154	0.573497	389.892	1.19687	0.000674703	-0.162444	0.743952	1.35931	7.54e-05
Smp_092770	5418.57	-0.0533652	0.156239	-0.341561	0.732681	0.999981	Coatomer subunit gamma	4	-0.145922	-0.419927	0.56585	1201.39	1.19224	6.13e-10	-0.263954	0.257862	1.45619	1.14e-14
Smp_089220	1354.29	-0.143178	0.168057	-0.851964	0.394234	0.919584	regulator of microtubule dynamics protein	4	-0.0775396	-0.534282	0.611821	256.868	1.1862	0.00371036	-0.477936	0.312566	1.66414	2.05e-05
Smp_197190	4201.27	-0.00055701	0.163734	-0.00340192	0.997286	0.999981	SEC23 interacting protein	4	-0.13398	-0.364419	0.498399	157.642	1.18607	0.0305287	-0.206847	0.783696	1.39291	0.00827008
Smp_017290	488.537	-0.286441	0.219063	-1.30758	0.191017	0.71901	hypothetical protein	4	-0.136363	-0.427269	0.563632	336.358	1.18458	0.00156198	-0.295316	0.537559	1.4799	4.39e-05
Smp_070030	4533.62	-0.34979	0.20362	-1.71785	0.0858231	0.473953	Charged multivesicular body protein 2b A	4	-0.0415284	-0.697173	0.738702	67.9256	1.18432	0.031356	-0.839495	0.15295	2.02381	9.28e-05
Smp_154960	2786.75	-0.136805	0.184179	-0.742781	0.457614	0.95055	transmembrane emp domain containing protein	4	-0.0944965	-0.446004	0.540501	463.121	1.18072	0.0117085	-0.361088	0.535303	1.5418	0.000572567
Smp_181100	888.187	-0.0998214	0.255193	-0.39116	0.695679	0.999981	oligosaccharyltransferase complex subunit ostc	4	-0.0859975	-0.501553	0.587551	263.706	1.17536	0.0154707	-0.428424	0.459892	1.60378	0.00051294
Smp_135790	12833.7	-0.036859	0.138862	-0.265436	0.790674	0.999981	Intersectin 1	4	-0.0736331	-0.567885	0.641518	301.428	1.17378	0.015107	-0.549448	0.314765	1.72322	0.000155626
Smp_129670	3742.22	-0.0814922	0.169246	-0.481501	0.630161	0.997803	apoptosis stimulating of P53	4	0.111626	-0.926011	0.814385	102.287	1.17166	0.0999381	-1.30585	0.0608012	2.47751	0.000109855
Smp_172990	2628.72	-0.235847	0.259559	-0.908644	0.363538	0.895878	leucine rich repeat containing protein 68	4	0.0353991	-0.874294	0.838895	95.7524	1.17112	0.180136	-1.04364	0.240063	2.21476	0.00466915
Smp_159150	3655.36	-0.265234	0.114604	-2.31435	0.0206485	0.177693	hypothetical protein	4	0.00405872	-0.804125	0.800067	266.685	1.16861	0.0126728	-1.01954	0.0314802	2.18816	4.92e-07
Smp_065470	4675.75	0.152312	0.17453	0.872699	0.382827	0.912636	tumor protein d52	4	0.00341598	-0.706938	0.703522	751.09	1.16703	5.05e-07	-0.874973	0.000233242	2.042	7.05e-20
Smp_033330	2856.24	0.287378	0.164758	1.74425	0.081116	0.4583	sh3 domain binding glutamic acid rich	4	0.0816281	-0.831174	0.749546	591.902	1.16633	2.76e-05	-1.12943	5.09e-05	2.29576	4.86e-18
Smp_091230	679.953	0.0948491	0.278981	0.339984	0.733868	0.999981	ubiquitin fold modifier 1	4	-0.0632596	-0.542318	0.605578	294.278	1.16318	0.0223166	-0.508834	0.384524	1.67201	0.000501044
Smp_142910	3179.91	-0.238056	0.281159	-0.846695	0.397165	0.921176	coatomer subunit alpha	4	-0.100718	-0.543189	0.643906	243.446	1.16052	0.000519289	-0.493484	0.191678	1.654	2.7e-07
Smp_127920	1986.86	-0.2084	0.185084	-1.12598	0.260174	0.812299	serine:threonine protein kinase 11	4	0.138021	-0.862575	0.724553	112.932	1.15942	0.0804598	-1.2368	0.0584707	2.39622	6.5e-05
Smp_006750	2171.2	-0.0834576	0.176338	-0.473283	0.636011	0.998794	DNA damage regulated autophagy modulator protein	4	-0.140019	-0.417498	0.557517	183.178	1.14809	0.0223034	-0.235684	0.724879	1.38377	0.00415398
Smp_157520	2608.05	0.00370548	0.159093	0.0232913	0.981418	0.999981	zinc finger protein zas	4	-0.111718	-0.425381	0.537099	51.0904	1.14109	0.164796	-0.290188	0.78446	1.43128	0.0632229
Smp_151690	2106.36	0.0774196	0.194228	0.398603	0.690186	0.999981	translation initiation inhibitor	4	-0.108856	-0.416979	0.525835	160.695	1.13834	0.0155242	-0.282993	0.640297	1.42133	0.00164719
Smp_151290	2403.27	-0.228833	0.158326	-1.44533	0.148366	0.631749	multidrug and toxin extrusion protein 2	4	0.031009	-0.680768	0.649759	343.936	1.12508	0.000817763	-0.852356	0.0137691	1.97744	5.24e-10
Smp_089100	978.763	-0.32203	0.188298	-1.71022	0.0872259	0.478885	gamma glutamyltransferase 7	4	-0.000991394	-0.701059	0.70205	326.938	1.11215	0.000705499	-0.879638	0.00894068	1.99179	1.61e-10
Smp_168650	61.7343	-0.343579	0.279153	-1.23079	0.218401	0.759045	microtubule actin cross linking factor 1	4	0.0363604	-0.671312	0.634952	84.6683	1.10956	0.0657642	-0.856831	0.173732	1.9664	0.000413246
Smp_088950	7328.8	-0.0183253	0.118144	-0.155109	0.876735	0.999981	Hypoxia up regulated protein 1	4	-0.167089	-0.407462	0.574551	873.873	1.10876	0.0366386	-0.198341	0.784552	1.3071	0.0101758
Smp_129400	352.522	-0.185899	0.211461	-0.879117	0.379338	0.909416	Vacuolar protein sorting associated protein	4	0.0395485	-0.852057	0.812509	27.9929	1.10724	0.262726	-1.08434	0.279155	2.19158	0.0128676
Smp_092320	1061.04	-0.166784	0.187721	-0.888463	0.374292	0.905082	RNA polymerase II elongation factor ELL	4	0.105893	-0.946515	0.840622	358.015	1.10503	0.0624968	-1.32146	0.02055	2.42649	5.35e-06
Smp_056850	1099.96	0.0335625	0.156714	0.214164	0.830419	0.999981	hypothetical protein	4	0.00518205	-0.613277	0.608095	281.475	1.09702	0.00423436	-0.756268	0.0597089	1.85329	2.98e-07
Smp_075810	3672.06	-0.185672	0.155568	-1.19351	0.232669	0.780242	pcd6 interacting protein	4	-0.105527	-0.40997	0.515497	175.644	1.09683	0.0194315	-0.301563	0.610818	1.3984	0.00182086
Smp_099310	4063.62	-0.0436	0.17389	-0.250733	0.80202	0.999981	protein transport protein SEC23	4	-0.00925376	-0.629666	0.63892	572.224	1.09586	0.000145166	-0.745367	0.0128967	1.84122	2.12e-11
Smp_099850	2010.17	-0.275143	0.112229	-2.45161	0.0142218	0.136457	divalent metal transporter DMT1B	4	-0.0880064	-0.455184	0.543191	274.331	1.09177	0.00280716	-0.364245	0.406465	1.45602	3.31e-05
Smp_169470	3342.62	-0.0609327	0.171603	-0.355079	0.72253	0.999981	RAB18, member RAS oncogene family	4	-0.0440042	-0.572417	0.616422	339.813	1.08287	0.000226886	-0.598462	0.0582512	1.68134	2.33e-09
Smp_158780	1048.76	-0.139417	0.262057	-0.532011	0.594718	0.994265	#N/A	4	-0.125207	-0.445538	0.570745	90.721	1.08089	0.00141174	-0.325951	0.434066	1.40684	1.97e-05
Smp_168950	1101.27	-0.445747	0.233473	-1.9092	0.0562367	0.361606	microtubule associated serine:threonine kinase	4	0.0267158	-0.743859	0.717143	190.5	1.07976	0.0469351	-0.97112	0.0762651	2.05087	3.72e-05
Smp_156900	767.981	-0.115884	0.154013	-0.752431	0.451792	0.949389	transmembrane protein 208	4	-0.139843	-0.343543	0.483386	196.22	1.07395	0.00439039	-0.144568	0.78784	1.21852	0.000896685
Smp_072870	618.545	-0.0159475	0.220942	-0.0721798	0.942459	0.999981	alpha centractin	4	-0.140738	-0.355316	0.496054	743.662	1.06259	8.42e-06	-0.169674	0.597064	1.23226	1.34e-07
Smp_031050	5660.25	-0.169985	0.199609	-0.851589	0.394442	0.919584	BSD domain containing protein 1	4	-0.109771	-0.499848	0.609619	574.558	1.05727	0.0776501	-0.424944	0.55111	1.48221	0.00809506
Smp_004200	1084.59	-0.335619	0.177485	-1.89097	0.0586283	0.369522	PPPDE peptidase domain containing protein	4	-0.126262	-0.412309	0.53857	172.999	1.05504	0.00685664	-0.269348	0.587943	1.32439	0.000421458
Smp_122080	960.366	-0.126412	0.159214	-0.79398	0.427207	0.938468	hypothetical protein	4	0.0387958	-0.717359	0.678563	244.359	1.05362	0.000720232	-0.951592	0.00257822	2.00521	1.26e-11
Smp_019940	3773.99	-0.0683432	0.142939	-0.47813	0.632558	0.99852	hypothetical protein	4	-0.0383276	-0.529356	0.567684	708.35	1.04924	0.00378187	-0.542706	0.171937	1.59195	3.47e-06
Smp_048240	2151.95	-0.115297	0.115393	-0.99917	0.317712	0.862809	mannose 1 phosphate guanyltransferase	4	0.0264331	-0.664128	0.637695	436.652	1.03358	6.69e-06	-0.846499	0.000307615	1.88008	2.05e-17
Smp_040790	4044.92	-0.11587	0.266756	-0.434368	0.664021	0.999981	peptidyl prolyl cis trans isomerase B	4	-0.113789	-0.342099	0.455889	2571.02	1.03333	0.0204603	-0.177782	0.771941	1.21111	0.00475729
Smp_129580	822.346	-0.237164	0.215912	-1.09843	0.272018	0.81853	hypothetical protein	4	-0.0435723	-0.444545	0.488118	75.5311	1.02545	0.10825	-0.42996	0.568566	1.45541	0.014511
Smp_169690	3081.87	-0.00912908	0.153632	-0.0594219	0.952616	0.999981	coatomer subunit epsilon	4	-0.0363684	-0.485658	0.522026	1152.6	1.01875	0.0310065	-0.505767	0.339611	1.52452	0.000566654
Smp_147990	2420.56	0.0235605	0.124722	0.188903	0.850169	0.999981	cyclic AMP dependent transcription factor ATF 6	4	-0.112686	-0.38845	0.501136	378.924	1.01713	0.0108907	-0.265715	0.600011	1.28285	0.000813097
Smp_000040	3496.31	-0.213254	0.197143	-1.08173	0.279375	0.827915	kinesin light chain	4	0.0274663	-0.6825	0.655033	746.202	1.00887	0.000295528	-0.894287	0.00141923	1.90315	4.77e-13
Smp_161120	4334.55	0.023251	0.194562	0.119504	0.904876	0.999981	metastasis suppressor protein 1	4	0.126366	-0.93304	0.806673	186.069	1.00706	0.256466	-1.25188	0.139504	2.25894	0.00343114
Smp_024150	4140.29	-0.209224	0.107485	-1.94654	0.05159	0.340228	UBX domain containing protein 2	4	-0.114097	-0.361248	0.475344	849.578	1.00618	6.41e-07	-0.2316	0.351633	1.23778	3.47e-10
Smp_213590	1493.51	-0.144437	0.143286	-1.00803	0.313438	0.860354	hypothetical protein	4	0.113293	-0.798258	0.684965	229.853	1.0029	0.000190374	-1.15155	1.93e-05	2.15445	8.05e-17
Smp_086420	2374.05	0.0480341	0.139742	0.343733	0.731047	0.999981	protein FAM114A2	4	0.0169485	-0.61991	0.602961	82.2734	1.00237	0.109035	-0.791244	0.223094	1.79362	0.00167578
Smp_131190	616.942	-0.291689	0.138436	-2.10704	0.0351143	0.262274	Diacylglycerol kinase zeta	4	0.249109	-1.07988	0.830772	44.4219	1.00228	0.0972297	-1.68925	0.00346901	2.69153	1.14e-06
Smp_136980	935.225	0.0869834	0.117921	0.737639	0.460734	0.952792	protein rogdi	4	0.143702	-0.724037	0.580335	28.1273	1.00027	0.224224	-1.01832	0.220676	2.01859	0.00654045
Smp_214170	6819.97	0.0269152	0.139273	0.193255	0.846759	0.999981	protein KRI1	4	0.0321277	-0.491839	0.459712	104.933	0.998794	0.17998	-0.611113	0.454652	1.60991	0.0175144
Smp_165200	1342.23	-0.266582	0.198042	-1.34609	0.178275	0.694755	hypothetical protein	4	-0.026818	-0.609261	0.636079	235.355	0.99372	0.0826215	-0.659076	0.28223	1.6528	0.00167887
Smp_173540	1310.22	-0.120009	0.142268	-0.843537	0.398928	0.92143	integrin alpha ps	4	0.112346	-0.948296	0.83595	129.961	0.992193	0.349019	-1.18762	0.244772	2.17982	0.0169171
Smp_051500	188.963	-0.308682	0.195896	-1.57574	0.115085	0.561512	nucleolar protein c7c	4	0.0966645	-0.792647	0.695982	64.0757	0.989415	0.0599786	-1.14004	0.0280341	2.12945	1.09e-05
Smp_128150	935.34	-0.359426	0.181526	-1.98003	0.0477002	0.322643	oxysterol binding protein 1	4	-0.0839804	-0.50088	0.58486	107.51	0.982534	0.0801271	-0.433771	0.508844	1.41631	0.00697273
Smp_073340	1965.93	-0.0578317	0.13355	-0.433035	0.664989	0.999981	cyclin dependent kinase 5	4	-0.0292584	-0.403963	0.433221	69.4942	0.979608	0.0869193	-0.350344	0.614364	1.32995	0.0136115
Smp_086900	1080.02	-0.238342	0.151246	-1.57585	0.11506	0.561512	ADP ribosylation factor protein 1 like	4	-0.0369016	-0.507399	0.544301	462.845	0.978329	0.0268936	-0.528039	0.279427	1.50637	0.000271885
Smp_042550	3600.73	0.0161736	0.117877	0.137208	0.890867	0.999981	sorting nexin 2	4	0.1014	-0.771987	0.670587	471.393	0.976886	2.65e-07	-1.11977	4.11e-09	2.09665	6.71e-30
Smp_167550	6582.6	-0.0138025	0.137882	-0.100103	0.920262	0.999981	sorting nexin 33	4	-0.118398	-0.465803	0.584201	314.273	0.976124	0.0830683	-0.363035	0.592567	1.33916	0.0111069
Smp_214140	2063.23	-0.0561292	0.131625	-0.426431	0.669794	0.999981	hypothetical protein	4	-0.0639028	-0.461471	0.525373	546.824	0.971367	0.00214592	-0.436131	0.220412	1.4075	3.13e-06
Smp_168660	2417.32	-0.488159	0.233153	-2.09373	0.0362842	0.268313	general vesicular transport factor p115	4	0.125023	-0.883859	0.758836	156.715	0.970423	0.300301	-1.16701	0.194117	2.13743	0.00842968
Smp_141080	3359.9	0.150441	0.176384	0.85292	0.393704	0.919248	DnaJ subfamily B 1	4	0.018367	-0.587521	0.569154	515.972	0.968525	1.78e-05	-0.719556	0.00192829	1.68808	6.58e-15
Smp_199000	2044.94	-0.0819257	0.192186	-0.426284	0.669901	0.999981	hypothetical protein	4	-0.0247815	-0.397824	0.422605	64.6726	0.96504	0.073915	-0.3645	0.574962	1.32954	0.00903409
Smp_093840	5976.91	-0.1563	0.108537	-1.44006	0.14985	0.635237	tetraspanning orphan receptor	4	-0.0295588	-0.531301	0.560859	1148.21	0.951848	0.00117208	-0.58413	0.0597089	1.53598	3.19e-08
Smp_212570	1389.6	-0.0799633	0.140016	-0.571102	0.567931	0.987561	disco interacting protein 2 (dip2)	4	-0.0164729	-0.539089	0.555562	185.033	0.951666	0.205347	-0.561243	0.501493	1.51291	0.0264941
Smp_153480	7660.73	-0.380327	0.220407	-1.72557	0.0844254	0.470386	solute carrier family 12	4	-0.0261894	-0.514018	0.540208	258.442	0.946197	0.190442	-0.509369	0.534285	1.45557	0.0270822
Smp_141720	2705.02	-0.0634788	0.158882	-0.399536	0.689499	0.999981	3-keto-dihydrosphingosine reductase	4	-0.0366174	-0.465904	0.502522	811.429	0.943443	0.00232392	-0.467554	0.171072	1.411	1.65e-06
Smp_197620	3194.93	-0.333114	0.193878	-1.71817	0.0857663	0.473953	hypothetical protein	4	0.0114524	-0.606142	0.59469	231.005	0.937095	0.124591	-0.686764	0.2843	1.62386	0.00341111
Smp_035190	1968.47	-0.0674197	0.115791	-0.582252	0.560397	0.985603	ras GTP exchange factor son of sevenless	4	0.0640253	-0.692725	0.6287	114.779	0.933394	0.0959918	-0.908082	0.105315	1.84148	0.000290945
Smp_132610	1899.38	-0.284545	0.196102	-1.45101	0.146777	0.629663	hypothetical protein	4	-0.0606298	-0.548927	0.609557	178.947	0.929501	0.313672	-0.551132	0.590439	1.48063	0.0738505
Smp_128950	2019.81	-0.0100423	0.127356	-0.0788519	0.93715	0.999981	tankyrase 1	4	-0.0935445	-0.353622	0.447167	199.005	0.925698	0.0078947	-0.249245	0.569979	1.17494	0.000451796
Smp_089000	2131.16	-0.0619039	0.264586	-0.233965	0.815012	0.999981	translocon associated protein subunit delta	4	0.0785748	-0.637462	0.558887	1332.39	0.919933	0.044342	-0.860813	0.0589748	1.78075	1.86e-05
Smp_210780	4279.14	-0.212639	0.154574	-1.37564	0.168932	0.677353	Loss of heterozygosity 11 chromosomal region 2	4	0.139891	-0.808641	0.66875	467.909	0.913878	0.000421727	-1.20709	1.79e-06	2.12097	3.49e-18
Smp_156880	6234.09	0.0780573	0.196175	0.397897	0.690706	0.999981	protein transport protein sec24c	4	0.119344	-0.81088	0.691537	525.438	0.906307	0.00154886	-1.19207	1.77e-05	2.09838	3.91e-15
Smp_132260	1537.34	-0.421807	0.235006	-1.79488	0.0726727	0.428216	serine:threonine protein kinase	4	0.0682445	-0.693832	0.625588	25.2981	0.905184	0.170152	-0.896769	0.182692	1.80195	0.00301712
Smp_129980	235.095	0.0947124	0.151786	0.623988	0.532635	0.981345	hypothetical protein	4	-0.0465467	-0.405089	0.451636	62.9531	0.889465	0.152049	-0.401874	0.57859	1.29134	0.0248173
Smp_149810	245.455	-0.178339	0.197963	-0.900868	0.367659	0.900091	hypothetical protein	4	0.0488134	-0.607616	0.558803	104.033	0.889417	0.102983	-0.781355	0.159041	1.67077	0.000757272
Smp_059690	1701.07	-0.235131	0.126753	-1.85504	0.0635906	0.391377	NF kappa B inhibitor interacting Ras	4	0.0125054	-0.503921	0.491415	517.488	0.887737	0.000237516	-0.613418	0.0142424	1.50116	6.68e-11
Smp_032180	5605.61	-0.0877161	0.214346	-0.409228	0.682373	0.999981	ADP ribosylation factor	4	0.124735	-0.735216	0.610481	2517.88	0.885187	0.0280261	-1.07734	0.00530677	1.96253	7.19e-08
Smp_088620	804.677	-0.0760062	0.172602	-0.440356	0.659679	0.999981	hypothetical protein	4	-0.074893	-0.35516	0.430053	299.352	0.884973	0.0427388	-0.249499	0.649813	1.13447	0.00625231
Smp_020360	1454.13	-0.44841	0.134891	-3.32423	0.00088663	0.0141417	hypothetical protein	4	0.0429043	-0.583476	0.540571	508.845	0.883912	3.95e-07	-0.765757	1.46e-05	1.64967	1.62e-22
Smp_153840	3125.91	0.00524422	0.110405	0.0475001	0.962115	0.999981	neurobeachin	4	0.122381	-0.670034	0.547653	213.348	0.880924	0.0564101	-0.978229	0.0297507	1.85915	8.94e-06
Smp_137210	2312.49	-0.346188	0.143893	-2.40586	0.0161343	0.150278	WD repeat containing protein 11	4	0.0203583	-0.496114	0.475755	169.915	0.878764	0.234986	-0.576122	0.473356	1.45489	0.0292243
Smp_150460	165.433	-0.034432	0.354942	-0.0970073	0.922721	0.999981	heavy metal associated domain containing protein	4	-0.0101661	-0.420991	0.431157	53.9926	0.874546	0.220623	-0.439823	0.590554	1.31437	0.0445588
Smp_096720	1296.41	-0.219509	0.133989	-1.63826	0.101368	0.5221	Lissencephaly type 1 y	4	-0.045047	-0.361321	0.406368	506.061	0.874224	0.0100295	-0.312882	0.438921	1.18711	0.000241414
Smp_043150	29330.1	-0.0386664	0.134207	-0.28811	0.773262	0.999981	calnexin	4	0.019776	-0.544213	0.524437	2302.13	0.873854	0.0283664	-0.680949	0.0963079	1.5548	2.23e-05
Smp_015050	2651.67	-0.0988751	0.129239	-0.765054	0.444239	0.947203	choline/ethanolamine kinase	4	-0.00936297	-0.463796	0.473159	427.535	0.86805	0.0159914	-0.511109	0.188017	1.37916	4.29e-05
Smp_210430	5555.55	-0.0015787	0.145322	-0.0108635	0.991332	0.999981	ras protein Rab 1A	4	0.0534887	-0.571557	0.518068	3848.14	0.862975	0.00374456	-0.739573	0.0134586	1.60255	6.9e-09
Smp_163210	4512.16	-0.302569	0.202695	-1.49273	0.135507	0.603877	echinoderm microtubule associated protein	4	0.312857	-1.14334	0.830483	511.1	0.858432	0.179598	-1.84566	0.00106054	2.70409	6.67e-07
Smp_167170	3761.98	-0.0218666	0.151003	-0.144809	0.884862	0.999981	ancient ubiquitous protein	4	-0.0753862	-0.425799	0.501185	973.834	0.857809	0.107586	-0.36553	0.55899	1.22334	0.0133746
Smp_061310	3411.94	-0.233514	0.122081	-1.91278	0.0557765	0.359723	hypothetical protein	4	0.0603602	-0.639943	0.579583	335.521	0.850996	0.00285735	-0.876368	0.00194771	1.72736	1.03e-10
Smp_156270	2394.05	-0.135786	0.111594	-1.21678	0.223686	0.767984	post gpi attachment to protein factor	4	0.0716296	-0.639814	0.568185	860.046	0.84518	0.0562221	-0.854708	0.0500314	1.69989	2.18e-05
Smp_047330	499.507	-0.197105	0.15414	-1.27874	0.200989	0.736531	hypothetical protein	4	0.194672	-0.73404	0.539368	174.206	0.843708	0.098505	-1.20618	0.0119458	2.04989	6.36e-06
Smp_180160	4160.6	-0.0819843	0.13999	-0.585644	0.558115	0.985603	Rho GTPase activating protein 12	4	-0.0583437	-0.411477	0.469821	349.585	0.839792	0.112883	-0.382174	0.536206	1.22197	0.012739
Smp_194760	5471.34	-0.155995	0.149453	-1.04377	0.296592	0.843484	hypothetical protein	4	-0.0153258	-0.492316	0.507641	1544.29	0.838394	0.00672463	-0.543421	0.0953185	1.38182	1.8e-06
Smp_213310	306.534	-0.279572	0.166949	-1.67459	0.094014	0.501596	guanylate kinase, putative	4	0.059015	-0.543488	0.484473	61.6221	0.836688	0.066396	-0.710415	0.130539	1.5471	0.000262387
Smp_167750	2372.8	-0.0845083	0.14959	-0.564932	0.57212	0.989913	fatty acid amide hydrolase 1	4	0.222876	-0.980276	0.757399	87.1998	0.835229	0.092856	-1.56155	0.000864799	2.39678	1.28e-07
Smp_065890	1645.22	-0.249517	0.153633	-1.62411	0.104351	0.529581	toll interacting protein	4	0.224954	-0.879311	0.654357	787.977	0.832862	0.00169794	-1.41684	1.96e-08	2.24971	5.13e-20
Smp_075030	400.664	-0.0173529	0.202214	-0.0858145	0.931614	0.999981	myotrophin	4	0.0949717	-0.524487	0.429516	103.582	0.826137	0.15486	-0.705183	0.235355	1.53132	0.00353754
Smp_140180	1354.88	0.194629	0.144927	1.34295	0.179289	0.698074	transmembrane emp24 domain containing protein 7	4	0.124259	-0.708283	0.584025	287.724	0.823704	0.0647632	-1.0163	0.0175373	1.84	4.63e-06
Smp_139840	2503.99	0.0390179	0.135113	0.288779	0.772751	0.999981	kunitz type protease inhibitor 2	4	0.171008	-0.792606	0.621597	598.596	0.82007	7.1e-05	-1.24706	5.56e-10	2.06713	5.83e-26
Smp_133150	2065.02	-0.14399	0.156001	-0.923011	0.356002	0.893988	oligomeric golgi complex subunit 5	4	-0.0411438	-0.411804	0.452948	144.286	0.819933	0.0885148	-0.370004	0.508521	1.18994	0.0080437
Smp_121790	3080.43	-0.0233646	0.192206	-0.12156	0.903248	0.999981	39S ribosomal protein L13, mitochondrial	4	0.0789754	-0.555584	0.476609	280.352	0.811593	0.044342	-0.742173	0.0667822	1.55377	2.6e-05
Smp_119980	4815.01	-0.00277221	0.114473	-0.0242171	0.980679	0.999981	Translocation protein SEC62	4	-0.0352422	-0.347613	0.382855	377.027	0.804618	3.86e-05	-0.304969	0.168827	1.10959	4.77e-09
Smp_003140	1665.68	-0.170763	0.132464	-1.28913	0.197353	0.730997	sorting nexin 32	4	0.124422	-0.646796	0.522373	166.105	0.80229	0.203857	-0.927051	0.128195	1.72934	0.00183224
Smp_170200	1086.28	-0.119254	0.141437	-0.843157	0.39914	0.92143	alpha tocopherol transfer protein	4	0.2264	-0.822602	0.596202	125.473	0.80182	0.0496898	-1.34619	0.0004727	2.14801	7.38e-09
Smp_049140	1004.11	-0.0416108	0.153135	-0.271727	0.785832	0.999981	hypothetical protein	4	-0.0247647	-0.334246	0.35901	417.832	0.799265	0.0622162	-0.29859	0.561483	1.09786	0.00645137
Smp_210850	925.188	-0.0343672	0.123547	-0.278172	0.780881	0.999981	transcription factor 25	4	-0.0576056	-0.34991	0.407516	127.307	0.795969	0.00122503	-0.29711	0.298235	1.09308	4.75e-06
Smp_127440	3025.2	-0.425548	0.123641	-3.44179	0.000577879	0.00993606	Serine rich adhesin for platelets	4	-0.0209646	-0.415149	0.436114	329.606	0.784501	0.150165	-0.421955	0.490993	1.20646	0.0155983
Smp_171580	430.161	-0.543807	0.156499	-3.47483	0.000511177	0.00904236	aromatic amino acid decarboxylase	4	0.240575	-0.846036	0.605461	461.221	0.782453	0.108492	-1.36843	0.00212933	2.15088	4.82e-07
Smp_156000	4164.83	-0.21457	0.133792	-1.60376	0.108768	0.544258	oxysterol binding protein 9	4	0.046717	-0.567588	0.520871	247.357	0.782073	0.208285	-0.738147	0.235675	1.52022	0.00583926
Smp_127840	889.422	-0.103429	0.186688	-0.554021	0.579564	0.990999	Dipeptidyl peptidase 9	4	0.0275372	-0.62007	0.592533	105.169	0.779651	0.213565	-0.741702	0.2382	1.52135	0.00641781
Smp_019490	1968.26	0.013221	0.170434	0.0775724	0.938168	0.999981	RER1 protein	4	-0.00524741	-0.386416	0.391663	553.98	0.776493	0.0587253	-0.394487	0.392179	1.17098	0.00221307
Smp_083240	1118.64	-0.0341773	0.257709	-0.13262	0.894494	0.999981	hypothetical protein	4	0.218124	-0.878526	0.660402	319.516	0.773873	0.0586112	-1.42594	0.000161017	2.19981	1.78e-09
Smp_059880	947.349	-0.0164696	0.136824	-0.12037	0.90419	0.999981	galactose 1 phosphate uridylyltransferase	4	-0.0177863	-0.376263	0.394049	31.9119	0.770541	0.216656	-0.403241	0.56882	1.17378	0.0412486
Smp_900100	9850.56	0.390713	0.322238	1.2125	0.225322	0.771256	NADH dehydrogenase subunit 3	4	0.0157169	-0.400322	0.384605	478.73	0.77041	0.18572	-0.435788	0.503139	1.2062	0.0229047
Smp_149200	6519.67	-0.00945182	0.223765	-0.04224	0.966307	0.999981	dynactin subunit 1	4	0.0146715	-0.487686	0.473014	496.702	0.769862	0.301956	-0.588835	0.453319	1.3587	0.0397955
Smp_072190	4398.88	-0.52063	0.230289	-2.26077	0.0237738	0.197239	membrane associated protein 29	4	0.197736	-0.884141	0.686406	2850.47	0.763753	0.0654992	-1.38339	0.000254049	2.14714	3.73e-09
Smp_091650	3259.6	-0.257011	0.198877	-1.29231	0.196249	0.729447	phospholipid transporting ATPase IIB	4	0.143283	-0.758196	0.614913	689.102	0.761544	0.173447	-1.10665	0.0325133	1.86819	0.000119029
Smp_017710	2106.26	-0.426598	0.383148	-1.1134	0.265535	0.8137	rab11 family interacting protein 3	4	0.125279	-0.84293	0.717652	27.8364	0.758018	0.382641	-1.17866	0.144642	1.93667	0.0096213
Smp_073140	1550.49	-0.0650404	0.173143	-0.375646	0.70718	0.999981	hypothetical protein	4	0.081479	-0.516848	0.435369	673.032	0.754699	0.0325463	-0.703889	0.0455618	1.45859	6.35e-06
Smp_144290	1925.23	-0.240115	0.197885	-1.21341	0.224972	0.770573	hypothetical protein	4	0.256097	-1.09544	0.839342	33.0072	0.752965	0.446144	-1.65047	0.0556741	2.40343	0.00335285
Smp_000640	3570.02	-0.184908	0.11846	-1.56094	0.118539	0.57176	hypothetical protein	4	-0.0366607	-0.377755	0.414416	437.309	0.748673	0.140726	-0.345613	0.556578	1.09429	0.0194255
Smp_130260	12028.4	-0.472336	0.367817	-1.28416	0.199086	0.733308	hypothetical protein	4	0.228707	-0.978271	0.749564	70.192	0.747918	0.33672	-1.49722	0.0312636	2.24514	0.000708093
Smp_149790	278.917	-0.148579	0.170974	-0.869019	0.384837	0.914675	hypothetical protein	4	0.0932474	-0.621514	0.528266	157.655	0.742988	0.205128	-0.866791	0.125388	1.60978	0.00180246
Smp_162040	2529.93	-0.155742	0.218639	-0.712325	0.476263	0.956644	Transmembrane 9 superfamily protein	4	-0.0164509	-0.377787	0.394238	975.376	0.742453	0.00283385	-0.378566	0.164889	1.12102	2.01e-06
Smp_099240	5797.85	0.127725	0.134928	0.946615	0.343835	0.883692	Protein VTS1	4	0.179294	-0.686043	0.506749	75.2362	0.741715	0.332768	-1.09006	0.125511	1.83177	0.00527767
Smp_177180	795.426	0.0633894	0.239705	0.264448	0.791435	0.999981	hypothetical protein	4	0.0371956	-0.469907	0.432711	128.733	0.739936	0.161085	-0.57687	0.293297	1.31681	0.00583855
Smp_029060	1759.05	0.0356299	0.148463	0.239991	0.810337	0.999981	hexaprenyldihydroxybenzoate methyltransferase	4	0.103514	-0.568954	0.465439	56.1714	0.737189	0.13502	-0.789337	0.105545	1.52653	0.000658906
Smp_123290	7566.24	-0.05721	0.188561	-0.303404	0.761582	0.999981	cGMP dependent protein kinase	4	0.0969293	-0.620503	0.523574	363.142	0.736866	0.309052	-0.830523	0.237858	1.56739	0.0126542
Smp_176370	2126.77	-0.106909	0.146371	-0.730398	0.465147	0.952792	TBC1 domain family 3	4	0.0204145	-0.415411	0.394997	511.663	0.732904	0.0204343	-0.481321	0.149678	1.21423	3.67e-05
Smp_089120	1158.08	-0.218878	0.211331	-1.03571	0.300337	0.847608	Oxysterol binding protein 11	4	0.0644653	-0.506582	0.442116	144.378	0.732853	0.390077	-0.634886	0.470048	1.36774	0.0661552
Smp_008320	4655.19	-0.103082	0.117697	-0.875828	0.381123	0.910643	3'(2'), 5' bisphosphate nucleotidase	4	0.111625	-0.629865	0.51824	525.46	0.731521	0.124678	-0.902937	0.0468094	1.63446	0.000106203
Smp_003340	2886.08	-0.158416	0.140783	-1.12525	0.260482	0.812299	hypothetical protein	4	-0.0321952	-0.379788	0.411983	445.635	0.729957	0.0588547	-0.358995	0.411821	1.08895	0.00251671
Smp_154620	2334.79	-0.128659	0.15069	-0.853798	0.393217	0.9188	WD repeat containing protein 59	4	0.109069	-0.591407	0.482338	70.0952	0.722426	0.234149	-0.816952	0.167489	1.53938	0.00421456
Smp_079760	1892.43	-0.0836402	0.127232	-0.657381	0.510936	0.972334	integrin linked protein kinase	4	-0.0232781	-0.39972	0.422998	30.7221	0.721029	0.157797	-0.403387	0.478063	1.12442	0.0179606
Smp_199120	8028.38	-0.130216	0.124777	-1.04358	0.296678	0.843484	protein FAM114A2	4	0.0544244	-0.507585	0.45316	466.617	0.708998	0.290655	-0.662313	0.327544	1.37131	0.0199852
Smp_212360	4298.19	-0.135831	0.157355	-0.863218	0.388018	0.916355	GRAM domain containing protein 1A	4	0.0251164	-0.489822	0.464705	353.667	0.705698	0.155373	-0.609661	0.226334	1.31536	0.0031618
Smp_123620	1790.57	0.0161716	0.115339	0.14021	0.888494	0.999981	hypothetical protein	4	-0.0218639	-0.359893	0.381757	445.788	0.691838	0.0273658	-0.342951	0.328224	1.03479	0.000441592
Smp_160770	1101.25	-0.270411	0.204016	-1.32544	0.185026	0.709487	arp2:3 complex 20 kDa subunit	4	0.0450662	-0.4033	0.358234	410.359	0.691323	0.142929	-0.482819	0.333433	1.17414	0.0060936
Smp_123960	2668.86	-0.129794	0.131166	-0.989539	0.322399	0.866146	hypothetical protein	4	0.0154338	-0.464336	0.448902	251.35	0.690859	0.341857	-0.564077	0.455783	1.25494	0.0496633
Smp_120800	672.515	-0.18541	0.148562	-1.24804	0.212018	0.751787	DNAj subfamily C member	4	0.223062	-0.887407	0.664345	319.422	0.688477	0.0739364	-1.45666	2.94e-05	2.14514	2.53e-10
Smp_044520	848.762	-0.10335	0.112504	-0.918626	0.358291	0.893988	hypothetical protein	4	0.0526426	-0.463698	0.411056	251.233	0.685955	0.0210484	-0.62792	0.0345796	1.31387	1.8e-06
Smp_199700	419.218	-0.0149569	0.213475	-0.070064	0.944143	0.999981	stromal cell derived factor 2	4	0.151357	-0.603394	0.452037	129.767	0.684935	0.172428	-0.906712	0.0565263	1.59165	0.000335917
Smp_155510	4006.64	0.182044	0.13072	1.39263	0.163732	0.664907	transmembrane protein 66	4	0.232995	-0.835906	0.602911	307.137	0.674658	0.138943	-1.38477	0.000688108	2.05943	1.83e-07
Smp_148650	5231.83	-0.168402	0.148468	-1.13426	0.256684	0.806858	autophagy protein 2	4	0.0194033	-0.352383	0.33298	97.3519	0.671236	0.234726	-0.416053	0.503139	1.08729	0.0336553
Smp_141790	1176.02	-0.0916699	0.204779	-0.447652	0.654404	0.999981	membrane associated guanylate kinase, WW and PDZ	4	0.0469841	-0.462381	0.415397	57.3325	0.670102	0.48849	-0.567208	0.569842	1.23731	0.138577
Smp_147790	1294.89	-0.046333	0.162881	-0.284459	0.776058	0.999981	homothorax homeobox protein	4	0.141806	-0.66695	0.525144	179.333	0.66297	0.365065	-0.963599	0.155818	1.62657	0.00893578
Smp_122910	2184.29	-0.0563512	0.124902	-0.451162	0.651872	0.999981	Serine:threonine protein kinase mTOR	4	0.0238045	-0.437171	0.413367	92.8306	0.662447	0.19373	-0.537279	0.306657	1.19973	0.00888702
Smp_194590	2409.44	-0.102972	0.142234	-0.723965	0.469087	0.954322	vacuolar protein sorting associated protein 52	4	0.0959579	-0.539884	0.443926	424.373	0.662403	0.083266	-0.776421	0.0346952	1.43882	2.61e-05
Smp_103200	6862.34	-0.207743	0.121985	-1.70303	0.0885632	0.4835	V type proton ATPase subunit D	4	0.190226	-0.719578	0.529352	634.499	0.654668	0.000166681	-1.17963	1.65e-12	1.8343	6.62e-29
Smp_203140	2683.85	0.333338	0.160416	2.07797	0.0377124	0.275926	Minor histocompatibility antigen H13	4	0.0173305	-0.358732	0.341401	1246.64	0.653495	0.0221512	-0.397365	0.19372	1.05086	7.7e-05
Smp_064240	1512.59	-0.119578	0.125699	-0.951307	0.341448	0.882031	AP 1 complex subunit mu 1	4	0.00649954	-0.347843	0.341344	772.03	0.653166	0.052392	-0.354926	0.339156	1.00809	0.00127217
Smp_019730	3838.18	0.00729645	0.23611	0.0309027	0.975347	0.999981	hypothetical protein	4	0.0397962	-0.39687	0.357074	1217.4	0.646741	0.182192	-0.473546	0.352909	1.12029	0.0102054
Smp_008310	2706.74	-0.0431862	0.217958	-0.19814	0.842935	0.999981	succinate dehydrogenase complex, subunit C	4	0.0989348	-0.502197	0.403262	1294.77	0.645664	0.152157	-0.708129	0.106006	1.35379	0.000687904
Smp_121940	2008.47	-0.10785	0.291219	-0.37034	0.711129	0.999981	FERM domain containing protein 5	4	0.31752	-1.05046	0.732942	60.7648	0.641031	0.482297	-1.66287	0.0298834	2.3039	0.00174237
Smp_148000	1045.35	0.00184454	0.169046	0.0109115	0.991294	0.999981	hypothetical protein	4	-0.0204464	-0.365555	0.386002	147.509	0.637229	0.173845	-0.362923	0.484601	1.00015	0.0193039
Smp_030370	49741.2	0.0167779	0.157919	0.106243	0.915389	0.999981	calreticulin	4	0.0380895	-0.427913	0.389823	10584.2	0.636066	0.116206	-0.544486	0.184995	1.18055	0.00120633
Smp_126770	4332.51	-0.0671254	0.104222	-0.644061	0.519536	0.975231	Islet cell autoantigen 1	4	0.235561	-0.785251	0.549691	558.746	0.626439	0.0248318	-1.34463	1.4e-07	1.97107	2.81e-15
Smp_150300	1715.88	-0.272614	0.252257	-1.0807	0.279831	0.828983	MAP kinase activating death domain	4	0.103	-0.538389	0.435389	113.279	0.625193	0.205074	-0.755976	0.109879	1.38117	0.00151582
Smp_047870	3109.15	-0.0370214	0.141055	-0.262461	0.792966	0.999981	LIM domain kinase 1	4	0.0386788	-0.477808	0.439129	409.111	0.62429	0.0298182	-0.618386	0.0290871	1.24268	2.34e-06
Smp_149240	1542.5	-0.0465695	0.169515	-0.274723	0.783529	0.999981	chromobox protein 2	4	0.246552	-0.85171	0.605157	49.6256	0.622778	0.425186	-1.39474	0.0395362	2.01751	0.00183917
Smp_198230	4525.19	-0.0416554	0.134835	-0.308936	0.75737	0.999981	hypothetical protein	4	0.305297	-0.940835	0.635538	1390.17	0.620895	0.433971	-1.58446	0.0170322	2.20536	0.000547334
Smp_194930	1260.36	-0.14466	0.14036	-1.03064	0.302712	0.849322	TBC1 domain family 0	4	0.0115469	-0.427963	0.416416	461.674	0.620799	0.0823581	-0.490552	0.181622	1.11135	0.000646113
Smp_144890	276.572	-1.29377	0.318802	-4.05823	4.94e-05	0.00124297	cyclic AMP responsive element binding protein	4	0.139346	-0.675614	0.536268	31.7048	0.619846	0.472721	-0.947074	0.231632	1.56692	0.0305935
Smp_006970	2797.25	-0.117378	0.225755	-0.519935	0.603109	0.996125	Rho GTPase activating protein 1	4	0.0744407	-0.512996	0.438555	84.2058	0.617007	0.0943844	-0.74151	0.0370812	1.35852	5.14e-05
Smp_174990	2292.78	-0.192805	0.117849	-1.63603	0.101832	0.5221	endo beta N acetylglucosaminidase	4	-0.000254308	-0.393205	0.393459	499.325	0.615066	0.0424126	-0.436765	0.167354	1.05183	0.000168071
Smp_180980	78.3431	0.768707	0.284827	2.69886	0.00695776	0.0762732	Rootletin	4	0.417823	-1.09623	0.678409	50.3996	0.614794	0.538466	-1.88475	0.0219069	2.49954	0.00169258
Smp_034850	4479.31	-0.0178768	0.184011	-0.0971506	0.922607	0.999981	TWiK family of potassium channels protein 7	4	0.298588	-1.02389	0.725298	29.7025	0.614305	0.381096	-1.67538	0.00601785	2.28969	0.000119698
Smp_139520	3101.21	-0.49096	0.294945	-1.66458	0.0959961	0.505995	eps8 protein	4	0.264927	-0.83785	0.572922	51.9373	0.608811	0.483748	-1.33679	0.0756181	1.9456	0.00656156
Smp_169250	750.89	-0.266933	0.172473	-1.54768	0.121701	0.575846	tumor protein p63 regulated gene 1 protein	4	0.117845	-0.499127	0.381282	117.005	0.606233	0.0945012	-0.745739	0.0317433	1.35197	3.66e-05
Smp_063490	732.431	-0.309932	0.202648	-1.52941	0.126163	0.588193	ATP dependent Clp Protease ATP binding subunit	4	0.0307379	-0.418113	0.387375	114.76	0.60553	0.208154	-0.513584	0.296327	1.11911	0.00941409
Smp_165930	6313.35	-0.357836	0.162185	-2.20634	0.0273601	0.217799	flightless I	4	0.202076	-0.57169	0.369614	194.162	0.604132	0.246901	-0.968739	0.0420684	1.57287	0.000461737
Smp_080100	2424.6	-0.21754	0.121827	-1.78565	0.0741554	0.432506	synaptophysin	4	0.0368107	-0.384978	0.348167	1150.28	0.597088	0.177566	-0.460647	0.316982	1.05774	0.00776975
Smp_032230	1398.93	-0.0515402	0.176162	-0.292572	0.769849	0.999981	mitochondrial fission 1 protein	4	0.0607951	-0.40187	0.341075	421.785	0.596391	0.194194	-0.52496	0.259661	1.12135	0.00621103
Smp_082810	3388.77	-0.273465	0.185633	-1.47315	0.140711	0.614994	Cdc42	4	0.00556332	-0.345589	0.340026	1231.6	0.595008	0.158372	-0.363934	0.429269	0.958942	0.0123804
Smp_031860	2420.66	-0.0043334	0.132853	-0.0326179	0.973979	0.999981	coatomer subunit delta	4	0.0519532	-0.375655	0.323702	465.172	0.583602	0.0120237	-0.471976	0.0452206	1.05558	1.07e-06
Smp_014170	22019.2	0.0504595	0.121906	0.413922	0.678931	0.999981	serine:threonine protein kinase	4	0.253305	-0.846992	0.593688	310.955	0.582527	0.6018	-1.29201	0.178323	1.87453	0.0355942
Smp_035010	963.892	-0.269866	0.184109	-1.46579	0.142705	0.619128	chibby 1	4	0.230172	-0.747362	0.517189	24.4172	0.577105	0.498957	-1.16485	0.121421	1.74196	0.0139834
Smp_020370	12410.1	-0.0894144	0.190156	-0.470216	0.638201	0.999328	reticulon 1	4	0.119818	-0.54824	0.428422	1159.07	0.576845	0.00924582	-0.824037	8.58e-05	1.40088	4.02e-12
Smp_175780	1600.4	-0.26523	0.210417	-1.2605	0.207489	0.748232	protein fem 1 C	4	0.0319471	-0.458642	0.426695	146.324	0.576295	0.414695	-0.542371	0.446442	1.11867	0.0672568
Smp_152370	5240.21	0.0331851	0.129932	0.255403	0.798412	0.999981	ADP ribosylation factor GTPase activating	4	0.239479	-0.747891	0.508412	891.631	0.575705	0.00994129	-1.27215	6.35e-10	1.84786	5.27e-20
Smp_055130	589.807	-0.379158	0.13433	-2.82258	0.00476394	0.0564938	pleckstrin y domain containing family F	4	0.0970332	-0.44244	0.345407	233.006	0.57159	0.055766	-0.621382	0.0324497	1.19297	1.14e-05
Smp_043210	3667.38	-0.076759	0.131131	-0.58536	0.558305	0.985603	tetraspanin	4	0.0153084	-0.349834	0.334526	496.532	0.569903	0.110481	-0.378447	0.32001	0.94835	0.00365039
Smp_169180	5540.2	-0.215049	0.116791	-1.84132	0.0655746	0.399819	E3 ubiquitin protein ligase HECTD1	4	0.282033	-0.797181	0.515149	186.835	0.569419	0.363013	-1.37192	0.0104732	1.94134	0.000170935
Smp_043940	3746	0.0413218	0.155812	0.265202	0.790854	0.999981	synaptosomal associated protein 29	4	0.264383	-0.772074	0.507691	210.547	0.55294	0.0311899	-1.34623	1.35e-08	1.89917	5.91e-16
Smp_085530	7976.37	-0.0799891	0.152803	-0.523479	0.600641	0.996125	synapse associated protein	4	0.257062	-0.836746	0.579684	885.397	0.550272	0.321352	-1.40606	0.00280806	1.95633	1.7e-05
Smp_164010	576.74	-0.101839	0.255994	-0.397817	0.690765	0.999981	serine:threonine protein phosphatase 6	4	0.160378	-0.625757	0.46538	43.1095	0.549081	0.591454	-0.884695	0.345841	1.43378	0.0900414
Smp_030300	42249.2	-0.0640273	0.106513	-0.601123	0.547758	0.985603	endoplasmin	4	0.0354744	-0.371837	0.336362	3257.77	0.548115	0.0206614	-0.462018	0.0535769	1.01013	3.53e-06
Smp_019100	3539.37	0.0530981	0.174179	0.304848	0.760482	0.999981	EH domain containing protein 1	4	0.202582	-0.656366	0.453784	570.348	0.547236	0.0183924	-1.09012	3.46e-07	1.63736	5.17e-15
Smp_142210	1151.82	-0.00015864	0.185536	-0.000855038	0.999318	0.999981	vacuolar protein sorting associated protein 18	4	0.140793	-0.507561	0.366768	121.771	0.541016	0.49654	-0.717206	0.336195	1.25822	0.0580855
Smp_122680	2552.37	0.0343311	0.137603	0.249494	0.802978	0.999981	oligophrenin 1	4	0.197269	-0.800418	0.603148	129.585	0.539587	0.469133	-1.31009	0.0366879	1.84967	0.00205082
Smp_024450	1599.81	-0.322069	0.277974	-1.15863	0.246607	0.79374	#N/A	4	0.42882	-1.20234	0.773516	30.0389	0.539222	0.610185	-2.01814	0.0184942	2.55736	0.00223997
Smp_157710	1185.17	-0.101767	0.115036	-0.884653	0.376344	0.907274	phosphoacetylglucosamine mutase	4	0.247629	-0.735869	0.488241	536.391	0.535853	0.0444201	-1.27347	1.18e-07	1.80933	1.7e-14
Smp_160620	3668.71	0.184666	0.147142	1.25501	0.209473	0.749208	subfamily M12B unassigned peptidase	4	0.283305	-0.74356	0.460255	175.194	0.526087	0.563917	-1.21606	0.116945	1.74214	0.0166998
Smp_022810	4872.18	-0.221361	0.199846	-1.10766	0.268009	0.815382	ras protein Rab 2B	4	0.229238	-0.681491	0.452254	385.526	0.525612	0.0480339	-1.16041	1.5e-06	1.68602	1.05e-12
Smp_044250	2186.8	-0.0582836	0.129202	-0.451106	0.651913	0.999981	STAM binding protein	4	0.0943233	-0.482034	0.387711	294.928	0.525157	0.0142502	-0.697779	0.000628525	1.22294	6.04e-10
Smp_010260	1176.45	0.0689987	0.149279	0.462214	0.643928	0.999981	DNA repair protein complementing XP A cells	4	0.114294	-0.472032	0.357737	23.2173	0.524497	0.508661	-0.745835	0.312029	1.27033	0.0582668
Smp_037910	5872.48	0.0728914	0.239924	0.30381	0.761273	0.999981	Succinate dehydrogenase (ubiquinone) cytochrome	4	0.0663144	-0.402058	0.335744	1017.02	0.522777	0.345169	-0.520622	0.345212	1.0434	0.0303526
Smp_094340	9150.7	0.0203107	0.142428	0.142604	0.886603	0.999981	hypothetical protein	4	0.110148	-0.453677	0.343529	1041.87	0.521765	0.0174975	-0.670908	0.00134816	1.19267	2.29e-09
Smp_146310	707.529	-0.0203582	0.131864	-0.154388	0.877304	0.999981	three prime repair exonuclease 1	4	0.101889	-0.447759	0.34587	335.569	0.514457	0.178057	-0.643782	0.0749984	1.15824	0.000559942
Smp_147820	3894.78	0.0110287	0.162605	0.0678251	0.945925	0.999981	hypothetical protein	4	0.18654	-0.578014	0.391474	31.3702	0.51396	0.463307	-0.886651	0.158412	1.40061	0.0173916
Smp_009990	2882.59	-0.019706	0.138252	-0.142536	0.886657	0.999981	Receptor protein-tyrosine kinase	4	0.180252	-0.564214	0.383962	128.697	0.511879	0.517881	-0.862072	0.224157	1.37395	0.0343725
Smp_000310	1387.75	-0.0616574	0.154864	-0.398139	0.690527	0.999981	transmembrane protein 41B	4	0.190347	-0.62072	0.430372	727.19	0.50605	0.318189	-1.01802	0.0217016	1.52407	0.000316569
Smp_002840	4205.39	-0.0532508	0.12901	-0.412766	0.679778	0.999981	hypothetical protein	4	0.0445504	-0.359914	0.315364	260.939	0.502264	0.0358789	-0.449278	0.059642	0.951542	1.61e-05
Smp_131570	1896.95	0.089657	0.143263	0.62582	0.531433	0.981345	ubiquitin carboxyl terminal hydrolase	4	0.0455599	-0.379953	0.334393	59.6139	0.49343	0.600101	-0.487209	0.609176	0.980639	0.223313
Smp_064520	235.453	-0.270746	0.16092	-1.68249	0.0924745	0.495638	mitotic spindle associated MMXD complex subunit	4	0.175503	-0.635077	0.459575	19.7744	0.492554	0.497534	-0.9877	0.122264	1.48025	0.0149086
Smp_140310	165.88	-0.447705	0.222603	-2.01123	0.0443014	0.30764	paxillin	4	0.422349	-1.11606	0.693714	51.6599	0.483406	0.625197	-1.86653	0.0197604	2.34993	0.0027289
Smp_124250	330.334	-0.35631	0.302457	-1.17805	0.238776	0.7871	high affinity cGMP specific 3',5' cyclic	4	0.291468	-0.959967	0.6685	29.2658	0.472924	0.686022	-1.48313	0.125755	1.95606	0.0336095
Smp_164960	5261.31	-0.0878375	0.122596	-0.716478	0.473696	0.955925	phosphatidylinositol 4,5 bisphosphate 3 kinase	4	0.232931	-0.698624	0.465694	240.467	0.471786	0.452405	-1.16203	0.0274758	1.63381	0.00123874
Smp_021220	1645.09	-0.463061	0.112648	-4.11069	3.94e-05	0.00100934	hypothetical protein	4	0.179045	-0.577361	0.398315	850.319	0.467823	0.159329	-0.921245	0.00183768	1.38907	1.1e-06
Smp_086190	4476.64	-0.170973	0.183304	-0.932728	0.35096	0.890556	progestin and adipoQ receptor family member	4	0.161078	-0.56212	0.401042	400.975	0.460624	0.404947	-0.898341	0.0634639	1.35897	0.00298415
Smp_209080	22.0262	-0.686047	0.434001	-1.58075	0.113936	0.559876	#N/A	4	0.126542	-0.363588	0.237045	23.7798	0.458977	0.524176	-0.574626	0.400343	1.0336	0.0931609
Smp_073400	32047.3	-0.0444238	0.129401	-0.343303	0.731371	0.999981	lysosome associated membrane glycoprotein	4	0.148647	-0.553398	0.404751	2314.92	0.458512	0.138876	-0.866415	0.00177673	1.32493	6.59e-07
Smp_078750	6833.31	0.0603788	0.15698	0.384626	0.700514	0.999981	tetraspanin 97e	4	0.212751	-0.638693	0.425942	1736.15	0.45527	0.166955	-1.08327	0.000156559	1.53854	3.3e-08
Smp_179360	11579.4	0.314707	0.145923	2.15666	0.031032	0.239482	sortilin	4	0.254905	-0.744291	0.489386	305.545	0.453681	0.602669	-1.22179	0.0915247	1.67548	0.014612
Smp_046290	6278.88	0.150864	0.165838	0.909706	0.362978	0.895671	CKLF MARVEL transmembrane domain containing protein	4	0.126769	-0.493851	0.367083	1561.83	0.453341	0.29204	-0.739699	0.0580204	1.19304	0.00110285
Smp_210730	3751.05	-0.198458	0.129009	-1.53832	0.123969	0.581267	prolyl oligopeptidase (S09 family)	4	0.30739	-0.839014	0.531624	539.655	0.453086	0.430028	-1.48128	0.00150631	1.93436	2.11e-05
Smp_132940	2302.43	-0.13367	0.104441	-1.27986	0.200595	0.735716	PRKCA binding protein	4	0.0592824	-0.360527	0.301245	725.424	0.451686	0.0530911	-0.497086	0.027648	0.948772	6.99e-06
Smp_186700	1909.57	0.110758	0.146495	0.756051	0.449618	0.949009	actin related protein 2:3 complex, subunit 1A	4	0.0688449	-0.355189	0.286344	403.498	0.450374	0.219077	-0.465555	0.194533	0.915929	0.00467353
Smp_052330	924.289	0.00306544	0.126753	0.0241844	0.980706	0.999981	asparagine linked glycosylation protein 11	4	0.0926067	-0.30433	0.211723	355.967	0.449986	0.180732	-0.437832	0.18777	0.887818	0.00302313
Smp_015070	1252.19	-0.064629	0.13133	-0.49211	0.622641	0.996858	vacuolar atp synthase subunit h	4	0.386656	-0.971577	0.584921	478.044	0.442466	0.200692	-1.79752	5.77e-10	2.23999	5.24e-15
Smp_080420	6309.58	0.122206	0.112307	1.08814	0.276533	0.823487	jun protein	4	0.103461	-0.409886	0.306425	816.622	0.439742	0.350198	-0.591615	0.180121	1.03136	0.0103111
Smp_163580	7784.13	-0.0761068	0.0985265	-0.77245	0.439848	0.944714	rab family	4	0.187756	-0.569796	0.38204	1136.15	0.437887	0.139146	-0.946624	0.000290452	1.38451	4.69e-08
Smp_139440	413.057	-0.139455	0.157884	-0.883276	0.377087	0.907725	coatomer subunit delta	4	0.0948977	-0.396448	0.30155	90.2223	0.435157	0.238679	-0.581909	0.0915979	1.01707	0.0018117
Smp_096840	1850.67	0.12987	0.121759	1.06661	0.286147	0.835033	#N/A	4	0.298979	-0.809307	0.510328	145.199	0.433671	0.382741	-1.42897	0.000524846	1.86264	4.5e-06
Smp_171590	2216.01	-0.282054	0.208978	-1.34969	0.177117	0.692754	#N/A	4	0.169802	-0.56766	0.397858	216.66	0.43121	0.577155	-0.900188	0.180438	1.3314	0.0328974
Smp_029520	321.945	-0.28736	0.170588	-1.68453	0.0920801	0.494449	actin binding lim protein 1	4	0.4372	-1.06985	0.632651	43.534	0.43098	0.603411	-1.88334	0.0042572	2.31432	0.000368984
Smp_024110	47357.8	-0.0598524	0.168456	-0.355299	0.722365	0.999981	enolase	4	0.252455	-0.594375	0.34192	834.235	0.424544	0.333561	-1.0744	0.00389445	1.49895	3.12e-05
Smp_048980	4243.03	-0.114186	0.136747	-0.835013	0.40371	0.92143	ligand of numb protein	4	0.155918	-0.472123	0.316205	293.993	0.42395	0.640772	-0.720122	0.386294	1.14407	0.124751
Smp_104520	2487.54	-0.114615	0.111604	-1.02698	0.30443	0.851394	vacuolar protein sorting 45	4	0.398771	-0.977234	0.578463	955.437	0.419152	0.15196	-1.84639	6.73e-14	2.26554	1.4e-20
Smp_043390	5695.84	0.202816	0.159878	1.26857	0.204593	0.742482	beta D xylosidase 2	4	0.165345	-0.554758	0.389413	116.377	0.418778	0.485971	-0.868159	0.0939173	1.28694	0.00856899
Smp_012970	2305.39	-0.204422	0.131073	-1.55961	0.118852	0.57176	myotubularin	4	0.141179	-0.407692	0.266513	115.351	0.4165	0.474262	-0.646406	0.220369	1.06291	0.028158
Smp_172650	1406.05	-0.135476	0.263445	-0.514246	0.60708	0.996858	rho guanine nucleotide exchange factor	4	0.1555	-0.587676	0.432175	35.441	0.412219	0.670341	-0.883983	0.300335	1.2962	0.0990985
Smp_133420	1453.98	-0.0938493	0.167597	-0.559971	0.575499	0.990953	serine:threonine protein kinase	4	0.111829	-0.497928	0.386099	64.528	0.407087	0.730953	-0.679048	0.542329	1.08613	0.264065
Smp_157700	1296.69	-0.0328499	0.164182	-0.200082	0.841417	0.999981	protein disulfide isomerase	4	0.280513	-0.660838	0.380325	34.6082	0.398662	0.606814	-1.14851	0.0744563	1.54717	0.013024
Smp_031950	1931.71	-0.103277	0.152853	-0.675667	0.499252	0.966157	Programmed cell death protein 10	4	0.0879488	-0.314202	0.226253	537.25	0.396784	0.294666	-0.448855	0.220369	0.84564	0.0102189
Smp_005190	5708.19	0.0703343	0.16502	0.426217	0.66995	0.999981	mitogen activated protein kinase kinase kinase	4	0.191402	-0.606071	0.414669	248.411	0.391046	0.429576	-1.00785	0.0150262	1.3989	0.000481873
Smp_142610	3349.93	-0.239342	0.1556	-1.53819	0.124002	0.581267	dual specificity tyrosine (Y) phosphorylation	4	0.0894886	-0.336276	0.246787	149.419	0.389634	0.48849	-0.486619	0.36034	0.876252	0.0639125
Smp_153290	2374.57	-0.0542229	0.174961	-0.309914	0.756627	0.999981	cement protein 3B variant 3	4	0.232875	-0.61913	0.386254	57.7656	0.388496	0.465602	-1.09911	0.0126602	1.48761	0.00059965
Smp_167890	1273.28	0.106015	0.240929	0.440027	0.659918	0.999981	methionine R sulfoxide reductase B2	4	0.0882093	-0.348487	0.260278	277.455	0.387872	0.33672	-0.48103	0.208885	0.868902	0.0125698
Smp_026270	4705.66	-0.0858154	0.161926	-0.529966	0.596135	0.99486	early growth response protein 1	4	0.0692923	-0.396598	0.327305	303.005	0.384158	0.400921	-0.553286	0.18881	0.937443	0.0151993
Smp_181370	469.517	-0.16469	0.201446	-0.81754	0.41362	0.926979	hypothetical protein	4	0.241142	-0.736597	0.495455	22.47	0.384038	0.779422	-1.03898	0.373682	1.42302	0.186008
Smp_186830	78.1177	-0.151858	0.2639	-0.575437	0.564995	0.986826	#N/A	4	0.200994	-0.49969	0.298696	23.054	0.377033	0.590723	-0.826296	0.172411	1.20333	0.037969
Smp_032120	21.1014	0.354187	0.44773	0.791073	0.428901	0.940429	hypothetical protein	4	0.10746	-0.366808	0.259348	224.413	0.376815	0.408586	-0.526906	0.211884	0.903721	0.0193039
Smp_154890	439.731	-0.0454591	0.163275	-0.27842	0.78069	0.999981	hypothetical protein	4	0.117986	-0.368552	0.250567	268.091	0.370445	0.274359	-0.577658	0.0607532	0.948102	0.00113731
Smp_017730	44562.1	-0.0735026	0.140327	-0.523795	0.600421	0.996125	200-kDa GPI-anchored surface glycoprotein	4	0.201181	-0.601199	0.400019	1010.81	0.366467	0.576004	-0.996338	0.066205	1.36281	0.00832853
Smp_139340	223.286	-0.197872	0.206449	-0.958455	0.337833	0.878909	hypothetical protein	4	0.444443	-1.06358	0.619137	1235.04	0.362422	0.262988	-1.99894	3.27e-14	2.36136	1.38e-19
Smp_208080	719.383	-0.108451	0.181479	-0.597596	0.550109	0.985603	beta ketothiolase	4	0.339124	-0.70534	0.366216	43.5774	0.359542	0.637	-1.28368	0.0368762	1.64322	0.0063023
Smp_189990	111.945	-0.209253	0.226914	-0.922167	0.356441	0.893988	hypothetical protein	4	0.161334	-0.526379	0.365045	25.9522	0.355259	0.73795	-0.799065	0.391717	1.15432	0.177989
Smp_103310	1844.09	0.0495572	0.14528	0.341115	0.733017	0.999981	signal recognition particle 9 kDa protein	4	0.106091	-0.338747	0.232656	373.629	0.352234	0.46979	-0.477368	0.29205	0.829602	0.041437
Smp_197280	1229.24	-0.125418	0.167128	-0.750432	0.452994	0.949389	phosphatidylinositol 4 phosphate 5 kinase type	4	0.195438	-0.507414	0.311976	238.219	0.350816	0.349431	-0.876927	0.00589785	1.22774	7.62e-05
Smp_025740	3072.26	-0.116928	0.111559	-1.04813	0.294581	0.841744	Rho GTP binding protein RhoU	4	0.251812	-0.717342	0.46553	568.771	0.350253	0.351687	-1.24861	5.02e-05	1.59886	1.32e-07
Smp_041550	1371.01	0.225161	0.224137	1.00457	0.315104	0.861637	hypothetical protein	4	0.348769	-0.964943	0.616174	163.99	0.346375	0.573226	-1.72221	0.000270727	2.06858	9.66e-06
Smp_171620	1874.95	-0.0820282	0.164669	-0.498139	0.618386	0.996858	methylthioadenosine phosphorylase	4	0.215334	-0.500135	0.284802	401.264	0.345649	0.33815	-0.881578	0.00392294	1.22723	3.66e-05
Smp_073930	2725.63	-0.0832415	0.164711	-0.505378	0.613293	0.996858	serine:threonine protein kinase Akt	4	0.110702	-0.359923	0.249221	529.978	0.345212	0.409996	-0.531362	0.163929	0.876574	0.012601
Smp_074930	1925.51	0.0153899	0.165166	0.0931786	0.925762	0.999981	palmitoyltransferase ZDHHC20	4	0.202547	-0.500842	0.298295	1068.26	0.34426	0.404187	-0.864174	0.0127567	1.20843	0.000302804
Smp_169900	1499.59	-0.125773	0.204338	-0.615515	0.538215	0.98412	serine:threonine protein kinase	4	0.278192	-0.707078	0.428886	138.4	0.342202	0.576345	-1.24791	0.010412	1.59012	0.000855389
Smp_067800	21713	-0.0420616	0.246253	-0.170807	0.864376	0.999981	fibrillin 2	4	0.426193	-1.0115	0.585307	2604.29	0.336891	0.565634	-1.85236	2.84e-05	2.18926	5.3e-07
Smp_083540	2678.87	0.00416437	0.151731	0.0274457	0.978104	0.999981	Myotubularin protein 2	4	0.132419	-0.425369	0.29295	611.193	0.334235	0.483852	-0.662578	0.109145	0.996813	0.0100957
Smp_173730	2535.98	0.190099	0.138452	1.37304	0.16974	0.678409	hypothetical protein	4	0.506196	-1.12218	0.615984	311.277	0.330712	0.271811	-2.16878	3.5e-18	2.4995	1.33e-23
Smp_126600	5802.83	-0.186535	0.175046	-1.06564	0.286588	0.835468	hypothetical protein	4	0.31676	-0.825899	0.509139	128.854	0.330578	0.55454	-1.4545	0.000878438	1.78508	3.71e-05
Smp_062260	2756.08	0.0429094	0.132828	0.323046	0.746661	0.999981	uridine cytidine kinase 2	4	0.191357	-0.509294	0.317937	623.881	0.329077	0.446144	-0.859804	0.0166284	1.18888	0.00059965
Smp_024220	1561.3	0.171307	0.178234	0.961133	0.336485	0.878173	hypothetical protein	4	0.224847	-0.499466	0.27462	32.3023	0.328053	0.754518	-0.830326	0.356186	1.15838	0.163354
Smp_131250	4422.75	-0.167013	0.223311	-0.747897	0.454522	0.949958	hypothetical protein	4	0.48907	-1.14701	0.657938	423.745	0.326878	0.447488	-2.17762	5.58e-11	2.5045	3e-14
Smp_210360	1243.51	0.0335893	0.166224	0.202072	0.83986	0.999981	orm1 protein 2	4	0.107794	-0.316627	0.208833	294.621	0.321304	0.519743	-0.45522	0.323695	0.776525	0.061123
Smp_006720	1458.87	-0.14055	0.221744	-0.633836	0.526188	0.97893	Synaptobrevin,domain containing protein	4	0.276903	-0.624649	0.347746	210.572	0.320705	0.583077	-1.11637	0.0166698	1.43707	0.00157341
Smp_052470	62.1665	0.0785049	0.315149	0.249104	0.803281	0.999981	o methyltransferase	4	0.149104	-0.454248	0.305143	21.7306	0.319624	0.626649	-0.689745	0.224078	1.00937	0.0646
Smp_198740	1104.79	-0.0869986	0.203636	-0.427226	0.669214	0.999981	#N/A	4	0.16448	-0.494504	0.330024	65.3811	0.318518	0.728217	-0.77146	0.329435	1.08998	0.135974
Smp_091730	3202.34	0.0337027	0.106289	0.317086	0.751179	0.999981	sorting nexin	4	0.342787	-0.837914	0.495126	956.807	0.309105	0.436581	-1.53523	7.42e-07	1.84434	1.76e-09
Smp_148070	2595.18	-0.125597	0.103986	-1.20783	0.227112	0.771256	exocyst complex component 5	4	0.127604	-0.372615	0.245011	392.596	0.306614	0.506438	-0.597191	0.135696	0.903804	0.0155903
Smp_022330	4729.82	-0.0534684	0.17359	-0.308016	0.75807	0.999981	dnaJ subfamily B	4	0.163825	-0.383648	0.219823	750.139	0.304887	0.600101	-0.627937	0.21541	0.932824	0.04601
Smp_174450	1120.56	-0.0864698	0.123641	-0.699361	0.484326	0.958379	surfeit locus protein 4	4	0.170084	-0.486081	0.315997	1137.37	0.302167	0.476372	-0.786825	0.0249512	1.08899	0.00124525
Smp_180470	1744.03	-0.099474	0.154239	-0.644932	0.518971	0.975212	Dynein intermediate chain	4	0.225683	-0.56621	0.340527	255.747	0.300431	0.295349	-1.00667	2.46e-05	1.3071	3.86e-08
Smp_170530	4517.44	-0.0870887	0.222879	-0.390744	0.695986	0.999981	upstream stimulatory factor 1	4	0.294597	-0.612473	0.317876	180.941	0.296972	0.752142	-1.095	0.143607	1.39198	0.0501175
Smp_058240	2087.63	-0.0975045	0.161031	-0.605501	0.544846	0.985603	Reticulon 4 (Neurite outgrowth inhibitor)	4	0.226746	-0.529758	0.303011	817.108	0.291484	0.468928	-0.931392	0.00403948	1.22288	0.000107012
Smp_197020	4201.98	0.111204	0.117815	0.943884	0.345229	0.884267	nucleolar protein c7c	4	0.270118	-0.692209	0.42209	352.014	0.290214	0.600101	-1.23908	0.00387347	1.5293	0.000279105
Smp_079000	7374.69	-0.254694	0.130489	-1.95184	0.0509573	0.337764	Charged multivesicular body protein 1b 2	4	0.217079	-0.560734	0.343655	222.237	0.28636	0.616524	-0.968195	0.0346371	1.25456	0.00486967
Smp_210250	1317.21	-0.0936893	0.20725	-0.45206	0.651226	0.999981	cell cycle control protein 50a	4	0.114835	-0.344066	0.22923	214.002	0.285497	0.421727	-0.526223	0.0909306	0.81172	0.00605643
Smp_085520	7712.14	-0.030708	0.140831	-0.218048	0.827391	0.999981	ATPase, H+ transporting, lysosomal 31 kDa, V1	4	0.335674	-0.762123	0.426449	1202.54	0.285136	0.321335	-1.42795	5.8e-10	1.71309	5.57e-14
Smp_196040	4301.97	-0.116682	0.107145	-1.089	0.276152	0.823476	SHC transforming protein 3	4	0.307879	-0.718056	0.410177	883.584	0.283792	0.238256	-1.35004	8.62e-12	1.63383	8.76e-17
Smp_041190	4300.02	-0.00136994	0.151482	-0.00904356	0.992784	0.999981	outer dense fiber protein 2	4	0.129092	-0.382051	0.252958	349.756	0.278055	0.702036	-0.595399	0.35175	0.873454	0.133911
Smp_138500	2812.85	-0.00957618	0.14605	-0.065568	0.947722	0.999981	ARF GTPase activating protein GIT2	4	0.223192	-0.553844	0.330652	111.966	0.277946	0.643508	-0.91141	0.0600579	1.18936	0.0112623
Smp_034400	3495.91	0.331926	0.193298	1.71717	0.0859477	0.473953	adaptor protein complex	4	0.286764	-0.626902	0.340139	477.219	0.261327	0.532533	-1.15883	0.000353573	1.42016	9.28e-06
Smp_056970	89451.4	-0.100655	0.208924	-0.48178	0.629962	0.997803	glyceraldehyde 3 phosphate dehydrogenase	4	0.295113	-0.636559	0.341446	20443.3	0.245928	0.685931	-1.18139	0.0108978	1.42732	0.00164041
Smp_210870	935.007	0.0939721	0.23251	0.404164	0.686092	0.999981	lethal(2) giant larvae protein 2	4	0.265216	-0.57691	0.311693	70.102	0.244367	0.83302	-0.936654	0.322964	1.18102	0.183358
Smp_105710	1221.45	0.00895347	0.193473	0.0462777	0.963089	0.999981	mps one binder kinase activator 3	4	0.162613	-0.3463	0.183686	332.845	0.241896	0.623692	-0.585357	0.161652	0.827254	0.0353135
Smp_005900	7544.23	0.0783732	0.134675	0.581943	0.560605	0.985603	BAG family molecular chaperone regulator 3	4	0.156379	-0.365042	0.208663	448.369	0.23819	0.533688	-0.603949	0.0577694	0.842139	0.00571064
Smp_147520	2122.19	-0.13088	0.127921	-1.02313	0.306248	0.852873	Tripartite motif containing protein 37	4	0.248147	-0.409551	0.161403	109.769	0.233899	0.754529	-0.813636	0.175657	1.04753	0.0669736
Smp_062890	1089.09	-0.0545887	0.26302	-0.207546	0.835584	0.999981	V type proton ATPase 16 kDa proteolipid	4	0.424146	-0.839479	0.415333	855.404	0.233482	0.681608	-1.6231	9.8e-05	1.85658	6.92e-06
Smp_038210	7814.58	0.130941	0.134964	0.970186	0.331954	0.873199	WW domain binding protein 2	4	0.24507	-0.571284	0.326214	728.968	0.231988	0.653345	-1.01995	0.010412	1.25194	0.00131637
Smp_004350	1803.39	-0.0564995	0.145848	-0.387388	0.698469	0.999981	ubiquitin conjugating enzyme E2 L3	4	0.276122	-0.610202	0.33408	664.779	0.230932	0.47421	-1.11025	8.49e-06	1.34118	5.8e-08
Smp_141920	3534.74	0.385103	0.152323	2.5282	0.0114648	0.114875	SH3 and multiple ankyrin repeat domains protein	4	0.211126	-0.53256	0.321435	117.389	0.224512	0.750659	-0.882284	0.111837	1.1068	0.038119
Smp_125640	4640.56	-0.144759	0.136508	-1.06044	0.288945	0.838076	syntaxin 12	4	0.411131	-0.88301	0.471879	679.515	0.220514	0.563658	-1.7183	1.19e-09	1.93881	4.95e-12
Smp_178490	870.233	-0.158477	0.145642	-1.08813	0.276539	0.823487	udp sugar transporter ustc	4	0.202254	-0.327738	0.125484	54.7279	0.217456	0.77023	-0.634488	0.304205	0.851944	0.142017
Smp_054220	6625.29	0.0277546	0.201587	0.13768	0.890493	0.999981	vacuolar ATP synthase subunit G	4	0.374029	-0.762365	0.388336	555.719	0.213659	0.508857	-1.47967	1.16e-09	1.69332	2.64e-12
Smp_168370	2472.76	-0.157537	0.14308	-1.10104	0.270878	0.817676	guanine nucleotide exchange factor VAV2	4	0.290989	-0.551606	0.260617	201.785	0.208073	0.738675	-1.07018	0.0227519	1.27826	0.00558463
Smp_044530	2996.16	-0.0755478	0.128795	-0.586574	0.55749	0.985603	growth factor receptor bound protein	4	0.148477	-0.329039	0.180562	1029.83	0.207558	0.581572	-0.54879	0.0786599	0.756347	0.0109789
Smp_128490	2901.45	0.0356695	0.149887	0.237976	0.811899	0.999981	syntaxin binding protein 5	4	0.252811	-0.544181	0.29137	277.363	0.204246	0.609412	-1.00289	0.000991638	1.20713	6.55e-05
Smp_198850	4882.39	-0.14285	0.123211	-1.1594	0.246294	0.793553	vacuolar sorting protein SNF8	4	0.189782	-0.391991	0.202209	381.677	0.196901	0.531317	-0.694408	0.00510073	0.891309	0.000271869
Smp_091850	920.928	-0.258316	0.195126	-1.32385	0.185554	0.710768	glucosamine 6 phosphate isomerase	4	0.168927	-0.363027	0.1941	44.6261	0.194287	0.774092	-0.634881	0.245176	0.829168	0.116679
Smp_212760	908.984	0.125322	0.171077	0.732549	0.463834	0.952792	kinesin, putative	4	0.52043	-1.03633	0.515901	20.2192	0.194072	0.880522	-1.9326	0.0373423	2.12668	0.0206218
Smp_157410	9202.53	-0.243062	0.15604	-1.55769	0.119307	0.57176	dynein heavy chain	4	0.237939	-0.368606	0.130667	621.174	0.189939	0.730552	-0.738654	0.0888363	0.928593	0.0258993
Smp_080070	294.013	-0.31745	0.197914	-1.60398	0.108718	0.544258	oligomeric Golgi complex component	4	0.161402	-0.308554	0.147153	136.002	0.187575	0.720444	-0.577069	0.176893	0.764644	0.0608947
Smp_040360	1575.38	0.0668874	0.111187	0.601578	0.547455	0.985603	endoplasmic reticulum Golgi intermediate	4	0.118971	-0.360339	0.241368	314.392	0.18393	0.803681	-0.549732	0.378479	0.733663	0.201917
Smp_144850	3512.15	-0.16957	0.172087	-0.985369	0.324443	0.867773	oxysterol binding protein 1	4	0.367191	-0.899329	0.532138	440.278	0.183361	0.800182	-1.65986	0.0011091	1.84322	0.00026022
Smp_149480	1224.11	0.019745	0.157587	0.125296	0.900289	0.999981	hypothetical protein	4	0.235216	-0.468523	0.233307	344.533	0.180315	0.52971	-0.85935	8.69e-05	1.03967	2.17e-06
Smp_131950	1116.12	-0.221461	0.153736	-1.44053	0.149719	0.634993	exocyst complex component 2	4	0.179549	-0.436561	0.257012	175.84	0.179716	0.73333	-0.740701	0.0709941	0.920417	0.0211153
Smp_012350	5712.87	-0.113814	0.116773	-0.97466	0.329729	0.871115	venom allergen-like (VAL) 11 protein	4	0.385961	-0.801023	0.415062	236.71	0.178322	0.602079	-1.5844	3.39e-10	1.76272	3.6e-12
Smp_034940	6787.51	-0.16642	0.184898	-0.900067	0.368084	0.900091	protein C10orf118	4	0.219441	-0.495369	0.275928	690.828	0.175891	0.851457	-0.889858	0.223414	1.06575	0.124544
Smp_007210	1421.37	-0.189101	0.264293	-0.715499	0.474301	0.955925	rab GTPase activating protein 1	4	0.381401	-0.825038	0.443637	74.5234	0.173602	0.863025	-1.49107	0.0392697	1.66468	0.019359
Smp_094130	626.334	-0.0560496	0.16062	-0.348958	0.727121	0.999981	palmitoyltransferase zdhhc3	4	0.180996	-0.422457	0.241461	226.628	0.173358	0.665767	-0.717331	0.0208345	0.890689	0.00371273
Smp_134470	405.947	-0.61563	0.216303	-2.84614	0.00442521	0.053357	calmodulin	4	0.316967	-0.795204	0.478236	74.0447	0.171196	0.884232	-1.29782	0.134413	1.46901	0.0802282
Smp_039820	2610.88	0.0491181	0.165537	0.296721	0.76668	0.999981	cysteine protease atg4b	4	0.169778	-0.39612	0.226342	374.563	0.167101	0.814606	-0.689954	0.222228	0.857055	0.108737
Smp_059750	1951.6	-0.124486	0.161404	-0.771269	0.440547	0.945278	ubiquitin conjugating enzyme E2 J2	4	0.284109	-0.566942	0.282833	389.956	0.16214	0.784235	-1.05593	0.0143913	1.21807	0.00419352
Smp_094470	1669.28	0.0604587	0.170359	0.354889	0.722673	0.999981	G patch domain and ankyrin repeats containing	4	0.221098	-0.524217	0.30312	44.133	0.160636	0.799987	-0.916006	0.0522128	1.07664	0.0226929
Smp_046360	2357.93	0.154565	0.123503	1.25151	0.210747	0.750125	Zinc finger protein 143	4	0.238326	-0.507262	0.268936	333.137	0.158984	0.832287	-0.936008	0.0976675	1.09499	0.044731
Smp_210740	4303.86	0.0144813	0.119198	0.12149	0.903303	0.999981	Actin protein 3	4	0.401765	-0.756961	0.355196	584.641	0.154843	0.694152	-1.50572	8.24e-08	1.66056	3.01e-09
Smp_152130	3868.27	-0.212354	0.186697	-1.13742	0.255362	0.805335	calmodulin regulated spectrin associated protein	4	0.42243	-0.822118	0.399689	154.623	0.153596	0.887463	-1.51686	0.0489912	1.67046	0.0271007
Smp_041390	1512.91	-0.0105131	0.177213	-0.0593248	0.952693	0.999981	ubiquitin conjugating enzyme	4	0.174492	-0.355641	0.181149	707.673	0.15234	0.622871	-0.628841	0.00878873	0.781181	0.000944963
Smp_139430	2160.78	-0.226452	0.213055	-1.06288	0.287835	0.836834	pleckstrin y domain containing family A	4	0.172552	-0.419084	0.246532	221.178	0.150252	0.869116	-0.669406	0.363754	0.819658	0.233491
Smp_129120	882.067	-0.420608	0.185624	-2.26591	0.0234567	0.195075	leucine rich repeat protein soc 2	4	0.312874	-0.50103	0.188156	26.395	0.147342	0.904977	-1.03217	0.281322	1.17951	0.19926
Smp_126500	3272.05	-0.442686	0.323744	-1.36739	0.171502	0.682911	tensin C1 domain containing phosphatase	4	0.493216	-1.14051	0.647292	89.8647	0.142905	0.892746	-2.07103	0.00398444	2.21393	0.00205436
Smp_210090	1384.52	0.00332846	0.222244	0.0149766	0.988051	0.999981	AP 3 complex subunit beta 2	4	0.232593	-0.487982	0.255389	195.495	0.142507	0.880409	-0.835301	0.255519	0.977808	0.161141
Smp_047060	1306.81	-0.196011	0.28361	-0.691129	0.489484	0.960354	hypothetical protein	4	0.195212	-0.368926	0.173714	433.752	0.142171	0.819613	-0.651438	0.178759	0.793609	0.0865474
Smp_212830	2027.6	-0.208116	0.182557	-1.14001	0.254283	0.803703	nitrogen permease regulator 3 protein	4	0.248334	-0.533227	0.284893	49.4575	0.138512	0.864746	-0.959186	0.110714	1.0977	0.0633608
Smp_018710	2104.27	0.0317341	0.128668	0.246636	0.80519	0.999981	DDB1 and CUL4 associated factor 7	4	0.30352	-0.582935	0.279415	472.283	0.136835	0.614109	-1.12863	1.22e-08	1.26546	2.27e-10
Smp_066010	9033.33	0.12858	0.218598	0.588204	0.556395	0.985603	cytochrome b5 type B	4	0.253628	-0.477051	0.223423	555.775	0.133398	0.82257	-0.886909	0.0406997	1.02031	0.0161159
Smp_161870	1397.61	0.0845967	0.226893	0.372849	0.709261	0.999981	hypothetical protein	4	0.211149	-0.400925	0.189776	360.501	0.131364	0.771852	-0.718875	0.0325513	0.850238	0.010237
Smp_085150	4822.18	-0.0996746	0.151731	-0.656915	0.511236	0.972334	phosphoglucomutase 2	4	0.330446	-0.63338	0.302934	631.622	0.129177	0.687919	-1.24415	5.89e-08	1.37333	2.15e-09
Smp_140320	694.592	-0.481753	0.31128	-1.54765	0.121707	0.575846	paxillin	4	0.393574	-0.835274	0.4417	38.4785	0.127949	0.893778	-1.50427	0.0262312	1.63222	0.0169326
Smp_157000	2995.01	-0.52683	0.161256	-3.26705	0.00108675	0.0169335	GTPase ObgE	4	0.435166	-0.893823	0.458658	168.817	0.125009	0.847599	-1.71554	9.68e-05	1.84055	2.98e-05
Smp_166400	749.332	-0.0271314	0.169015	-0.160527	0.872466	0.999981	eukaryotic initiation factor 4A I	4	0.223401	-0.42337	0.19997	81.0803	0.120009	0.897363	-0.737121	0.310236	0.85713	0.214618
Smp_091750	8695.09	0.250805	0.166235	1.50874	0.131366	0.594889	hypothetical protein	4	0.276223	-0.603693	0.32747	282.248	0.106854	0.851679	-1.10994	0.00495868	1.21679	0.0020122
Smp_032790	785.51	-0.0842035	0.229279	-0.367254	0.71343	0.999981	hypothetical protein	4	0.28975	-0.542675	0.252925	341.352	0.102864	0.870679	-1.03544	0.0186175	1.1383	0.00911597
Smp_162290	964.296	-0.145496	0.206939	-0.703087	0.482002	0.958128	hypothetical protein	4	0.570236	-1.18983	0.619593	56.022	0.0973153	0.944312	-2.16068	0.0176631	2.258	0.012739
Smp_039810	6259.39	-0.0179198	0.192856	-0.0929183	0.925968	0.999981	muscleblind protein	4	0.284346	-0.559085	0.274739	433.021	0.0961225	0.926596	-0.986998	0.20421	1.08312	0.14747
Smp_149910	3628.98	-0.105728	0.222563	-0.475047	0.634754	0.998794	lar interacting protein (lip) protein	4	0.393194	-0.56977	0.176576	113.961	0.0939217	0.92415	-1.22746	0.0796863	1.32139	0.0545306
Smp_199940	1212.16	-0.187362	0.108163	-1.73221	0.083236	0.465569	transmembrane 9 superfamily protein member	4	0.289501	-0.528838	0.239337	111.739	0.0898815	0.841657	-1.01675	0.000916186	1.10663	0.000439498
Smp_083400	2607.02	0.104745	0.148086	0.707325	0.479364	0.957	hypothetical protein	4	0.206297	-0.400353	0.194056	349.71	0.0871376	0.830206	-0.73323	0.0103983	0.820368	0.00407601
Smp_002100	1839.52	-0.684199	0.200896	-3.40574	0.000659855	0.0111013	Vesicle transport protein SFT2B	4	0.21018	-0.42265	0.21247	267.475	0.0846293	0.880221	-0.755279	0.0590548	0.839908	0.0332145
Smp_126460	1794.83	-0.0603413	0.136845	-0.440946	0.659252	0.999981	hypothetical protein	4	0.248476	-0.454511	0.206034	398.165	0.0820474	0.859136	-0.869849	0.00632139	0.951897	0.00278531
Smp_089870	5773.39	-0.149262	0.216156	-0.690527	0.489863	0.960354	histone H2A	4	0.297486	-0.540626	0.24314	849.839	0.0774916	0.899298	-1.04998	0.0120495	1.12748	0.00657835
Smp_050760	452.547	-0.0291098	0.221643	-0.131336	0.895509	0.999981	hypothetical protein	4	0.228748	-0.405786	0.177038	230.799	0.0757731	0.895092	-0.740968	0.0693708	0.816741	0.0423186
Smp_131460	2779.53	-0.17862	0.120446	-1.48299	0.138076	0.609365	bestrophin 3	4	0.301914	-0.488863	0.186949	418.383	0.0674553	0.902138	-0.983308	0.00816447	1.05076	0.00463822
Smp_023620	1238.83	-0.00534376	0.152923	-0.0349441	0.972124	0.999981	FERM domain containing protein 5	4	0.557031	-1.01037	0.453338	475.712	0.0660403	0.901971	-2.08213	1e-09	2.14817	2.83e-10
Smp_163420	6129.01	-0.100505	0.161878	-0.620868	0.534687	0.9816	protein kinase	4	0.251576	-0.432628	0.181051	165.467	0.0652672	0.934003	-0.832491	0.143607	0.897758	0.106022
Smp_102480	852.369	0.0544393	0.183594	0.296519	0.766833	0.999981	hypothetical protein	4	0.274922	-0.446358	0.171436	304.862	0.065187	0.908789	-0.879243	0.0250989	0.94443	0.0156659
Smp_025410	2027.79	-0.344758	0.124897	-2.76034	0.00577414	0.0659671	calcium dependent mitochondrial carrier protein	4	0.585596	-1.06187	0.476274	130.703	0.0616963	0.913911	-2.16002	9e-09	2.22172	6.43e-09
Smp_055900	1868.8	-0.0667557	0.22871	-0.291879	0.770379	0.999981	leptin receptor overlapping transcript	4	0.266586	-0.453374	0.186788	684.001	0.0568463	0.944043	-0.863515	0.122815	0.920361	0.0915684
Smp_169440	2580.18	-0.101435	0.212282	-0.477829	0.632772	0.99852	ubiquitin protein ligase	4	0.2779	-0.453752	0.175852	1164.73	0.0537198	0.937915	-0.888396	0.060526	0.942116	0.0427376
Smp_071630	4956.98	-0.0619433	0.128993	-0.480206	0.631081	0.997867	rab-2,4,14, putative	4	0.251436	-0.473165	0.221728	1288.45	0.0532993	0.878309	-0.889387	9.25e-05	0.942686	3.48e-05
Smp_210970	1890.16	0.0201409	0.137044	0.146967	0.883158	0.999981	serine:threonine protein kinase MAK	4	0.358707	-0.625097	0.26639	211.714	0.0500349	0.939129	-1.25105	0.00331267	1.30109	0.00233461
Smp_135540	1009.75	-0.0156176	0.157682	-0.0990448	0.921103	0.999981	leishmanolysin 2 (M08 family)	4	0.373736	-0.717581	0.343845	148.99	0.0457307	0.94704	-1.40499	0.00103261	1.45072	0.000767719
Smp_117810	933.238	-0.0902012	0.153755	-0.586654	0.557436	0.985603	v type proton atpase subunit h	4	0.468704	-0.909075	0.440371	116.892	0.0335897	0.957251	-1.81707	1.21e-06	1.85066	1.11e-06
Smp_051510	3470.65	-0.227271	0.158508	-1.43381	0.151626	0.63835	pericentrin fragment	4	0.277739	-0.490235	0.212496	96.1865	0.0317684	0.982465	-0.955034	0.255894	0.986802	0.225898
Smp_126750	864.855	-0.0614075	0.180098	-0.340967	0.733129	0.999981	Transmembrane protein 86A	4	0.262804	-0.43457	0.171767	360.564	0.0311006	0.962809	-0.842315	0.0414699	0.873416	0.0335543
Smp_138170	774.169	-0.0116238	0.180101	-0.0645405	0.94854	0.999981	hypothetical protein	4	0.4077	-0.770786	0.363086	109.959	0.0281821	0.984088	-1.4145	0.0600579	1.44269	0.0526503
Smp_170550	17838.5	-0.269892	0.18062	-1.49425	0.135109	0.603509	granulin	4	0.298409	-0.531157	0.232748	2020.59	0.0144911	0.971949	-1.04981	2.59e-06	1.0643	1.98e-06
Smp_146630	1121.55	-0.187857	0.160864	-1.16779	0.24289	0.791943	palmitoyltransferase ZDHHC12	4	0.361112	-0.49529	0.134178	70.0174	0.00738396	0.996329	-1.03669	0.0314323	1.04407	0.0331928
Smp_155790	4829.3	0.13052	0.14123	0.924172	0.355397	0.893988	hypothetical protein	4	0.321926	-0.590061	0.268135	390.223	0.00693957	0.996641	-1.14368	0.0144009	1.15062	0.0139366
Smp_148400	3993.66	-0.143015	0.116366	-1.22901	0.219068	0.760325	calmodulin binding transcription activator 2	4	0.467115	-0.818802	0.351688	70.0509	0.0065504	0.99933	-1.60371	0.022097	1.61026	0.0220986
Smp_009580	20181.8	-0.196867	0.19629	-1.00294	0.315889	0.861662	polyubiquitin	4	0.358113	-0.577007	0.218894	15988	-0.000262028	1	-1.18537	0.00893665	1.18511	0.00881339
Smp_166380	1426.97	-0.0169628	0.219715	-0.0772036	0.938462	0.999981	hypothetical protein	4	0.499412	-0.970008	0.470595	53.5195	-0.00274933	1	-1.77902	0.0447603	1.77627	0.0443737
Smp_074900	2128.01	-0.868532	0.153022	-5.67586	1.38e-08	8.6e-07	docking protein 3	4	0.273305	-0.577192	0.303886	20.3535	-0.00533257	1	-0.977134	0.338501	0.971802	0.330086
Smp_085830	1120.34	-0.0467602	0.108511	-0.430925	0.666523	0.999981	hypothetical protein	4	0.3529	-0.62448	0.27158	495.6	-0.0064207	0.993453	-1.25893	3.49e-07	1.25251	5.29e-07
Smp_172580	5561.8	-0.391866	0.317043	-1.236	0.216457	0.754616	docking protein 3	4	0.64836	-1.13407	0.485707	130.951	-0.0100905	0.997833	-2.19939	0.00533887	2.1893	0.00568816
Smp_087750	481.79	0.15506	0.190057	0.815858	0.414581	0.928165	hypothetical protein	4	0.317664	-0.651792	0.334127	25.0233	-0.0188057	0.99337	-1.16653	0.161607	1.14772	0.167478
Smp_127810	6855.44	0.00160454	0.175241	0.00915619	0.992695	0.999981	cell adhesion molecule:down regulated by	4	0.37738	-0.562551	0.185172	275.492	-0.0258424	0.982465	-1.16644	0.0670166	1.1406	0.0717917
Smp_169870	1035.45	0.166665	0.148551	1.12194	0.261887	0.813381	cystinosin	4	0.285406	-0.515552	0.230147	70.6346	-0.0503801	0.959215	-1.04516	0.107469	0.994778	0.126244
Smp_043990	8307.26	-0.0961549	0.126538	-0.75989	0.44732	0.948503	basigin	4	0.394249	-0.683697	0.289448	1609.86	-0.0553548	0.879352	-1.41485	1.05e-09	1.35949	5.05e-09
Smp_130300	4503.45	-0.0358777	0.143144	-0.250641	0.802092	0.999981	Na+:K+ ATPase alpha subunit	4	0.554958	-0.956238	0.40128	621.632	-0.0808157	0.915	-1.96163	6.51e-05	1.88082	0.000143006
Smp_135870	2630.6	-0.2801	0.153551	-1.82414	0.0681308	0.410456	WD repeat and FYVE domain containing protein 3	4	0.502063	-0.651056	0.148993	78.6445	-0.092709	0.932183	-1.40337	0.064504	1.31066	0.085808
Smp_139500	1063.62	-0.116302	0.250008	-0.465194	0.641792	0.999907	hypothetical protein	4	0.431014	-0.686379	0.255365	216.648	-0.10152	0.888197	-1.40953	0.00388315	1.30801	0.00850555
Smp_019280	1556.17	-0.231768	0.154965	-1.49561	0.134754	0.602831	cAMP dependent protein kinase R2	4	0.531577	-1.02684	0.495259	84.5358	-0.102887	0.908789	-2.03293	0.000722858	1.93004	0.00161461
Smp_099150	2152.73	0.0245185	0.142401	0.172179	0.863297	0.999981	Pleckstrin protein domain containing family	4	0.3957	-0.634626	0.238926	439.923	-0.11336	0.860033	-1.30861	0.00299452	1.19525	0.00761306
Smp_078060	1006.09	-0.143505	0.12389	-1.15832	0.246732	0.793844	hypothetical protein	4	0.466706	-0.788087	0.32138	52.1283	-0.123881	0.904977	-1.60407	0.0262395	1.48019	0.0440633
Smp_035020	1390.59	-0.170164	0.129478	-1.31423	0.188767	0.715339	tetraspanin	4	0.467868	-0.665412	0.197544	75.3681	-0.150111	0.868363	-1.37409	0.0319227	1.22398	0.0610779
Smp_146200	4291.92	0.00188822	0.170371	0.011083	0.991157	0.999981	zyxin:trip6	4	0.39688	-0.578955	0.182075	830.226	-0.154364	0.83113	-1.26859	0.0139275	1.11423	0.0331684
Smp_148330	1198.37	-0.114474	0.121207	-0.944451	0.344939	0.884152	DENN domain containing protein 1A	4	0.550577	-1.02535	0.47477	36.6043	-0.159848	0.907293	-1.94065	0.0443724	1.7808	0.0678317
Smp_157200	102.721	0.555142	0.32599	1.70294	0.0885788	0.4835	progesterone induced blocking factor 1	4	0.562246	-0.713319	0.151072	24.7876	-0.165493	0.886943	-1.56783	0.0588215	1.40233	0.0978851
Smp_074000	33092.9	-0.307537	0.101191	-3.03916	0.00237235	0.0319672	hypothetical protein	4	0.630287	-1.02475	0.394466	3428.99	-0.172622	0.737293	-2.20626	5.06e-10	2.03364	1.1e-08
Smp_126170	3168.55	-0.0201817	0.191855	-0.105192	0.916223	0.999981	Rab GTPase binding effector protein 1	4	0.38789	-0.58079	0.1929	222.477	-0.178572	0.843365	-1.22893	0.0630358	1.05035	0.117109
Smp_173120	614.826	0.175928	0.202181	0.870149	0.384219	0.914675	presqualene diphosphate phosphatase	4	0.409595	-0.627393	0.217798	203.697	-0.197237	0.560177	-1.35509	6.79e-08	1.15785	9.83e-06
Smp_171300	12016.5	0.329688	0.179762	1.83402	0.0666506	0.403948	ATPase, H+ transporting, lysosomal accessory	4	0.533332	-0.810706	0.277374	2071.12	-0.211172	0.66148	-1.76844	3.74e-07	1.55727	9.79e-06
Smp_145670	2371.3	-0.0836306	0.109504	-0.763719	0.445035	0.94794	SEC63 protein	4	0.548116	-0.707775	0.15966	22.9925	-0.212312	0.865032	-1.5638	0.0886462	1.35149	0.149651
Smp_174690	2586.06	0.0759936	0.146093	0.520173	0.602943	0.996125	TOM1 protein 2 like	4	0.491716	-0.782458	0.290742	138.22	-0.221888	0.765516	-1.64921	0.00192829	1.42732	0.00877083
Smp_150660	1024.9	-0.132724	0.15483	-0.857225	0.391321	0.916921	phosphatidylinositol 4 kinase	4	0.467816	-0.662028	0.194213	32.543	-0.227593	0.827364	-1.38807	0.0727643	1.16048	0.145705
Smp_034420	2669.8	-0.0434668	0.181436	-0.239571	0.810663	0.999981	proteinase inhibitor I25	4	0.461852	-0.710299	0.248447	889.381	-0.229588	0.647784	-1.52722	3.76e-05	1.29763	0.000605379
Smp_130280	3134.52	-0.306824	0.1955	-1.56943	0.116548	0.56689	neurogenic locus notch protein	4	0.646535	-1.01443	0.3679	28.2885	-0.236145	0.822587	-2.11359	0.00484817	1.87744	0.0151504
Smp_212310	1327.64	0.0302579	0.21388	0.141471	0.887498	0.999981	hypothetical protein	4	0.485447	-0.684868	0.199421	171.407	-0.24032	0.780862	-1.44301	0.0227399	1.20269	0.0636357
Smp_147760	1982.21	-0.181279	0.163004	-1.11211	0.266089	0.813711	hypothetical protein	4	0.645455	-1.02079	0.375336	55.4052	-0.280666	0.771567	-2.11955	0.00237017	1.83888	0.0102762
Smp_173080	4584.88	0.273737	0.100517	2.7233	0.00646336	0.0719764	engulfment and cell motility protein 1	4	0.536094	-0.81192	0.275825	210.626	-0.293535	0.670341	-1.76639	0.000584637	1.47286	0.00527214
Smp_004310	4519.05	0.0672278	0.204182	0.329255	0.741963	0.999981	ATPase, H+ transporting, lysosomal, V0 subunit	4	0.489574	-0.660658	0.171085	4126.26	-0.2951	0.570896	-1.47546	0.000196477	1.18036	0.00368912
Smp_209040	6498.99	-0.0985913	0.136333	-0.723165	0.469579	0.954322	long chain fatty acid coenzyme A ligase	4	0.484365	-0.714513	0.230148	470.557	-0.298069	0.481018	-1.58382	9.58e-07	1.28575	0.000108408
Smp_100080	103.569	-0.184872	0.221836	-0.833374	0.404634	0.92143	Tetraspanin,IPR000301 CD9:CD37:CD63	4	0.715416	-1.03901	0.323597	104.8	-0.425044	0.433565	-2.32832	5.31e-08	1.90328	1.72e-05
Smp_123680	3718.53	-0.187456	0.129771	-1.44452	0.148593	0.63209	hypothetical protein	4	0.66308	-0.874594	0.211514	286.413	-0.452591	0.270124	-2.03407	1.39e-09	1.58148	4.82e-06
Smp_099890	10560	-0.10997	0.119056	-0.923678	0.355654	0.893988	Receptor expression enhancing protein 5	4	0.653787	-0.866039	0.212252	1616.5	-0.498874	0.110951	-2.03671	1.99e-14	1.53783	1.37e-08
Smp_133480	47.2279	0.377249	0.328251	1.14927	0.250444	0.797054	forkhead box protein L1	#N/A	#N/A	#N/A	#N/A	24.7387	3.01136	0.000829068	1.08071	0.315716	1.93065	0.0281064
Smp_162320	862.111	-0.143809	0.338522	-0.424814	0.670972	0.999981	hypothetical protein	#N/A	#N/A	#N/A	#N/A	7.05108	2.99799	0.0027502	0.154407	0.925886	2.84358	0.00388921
Smp_166630	564.256	0.147184	0.131102	1.12267	0.26158	0.813309	#N/A	#N/A	#N/A	#N/A	#N/A	1.84496	2.96947	0.0437966	-0.554208	0.785511	3.52368	0.0126534
Smp_004690	952.723	-0.377477	0.146165	-2.58254	0.00980765	0.100953	hypothetical protein	#N/A	#N/A	#N/A	#N/A	40.0019	2.96388	2.41e-05	-2.5977	0.00618196	5.56158	8.3e-11
Smp_024810	751.92	-0.551089	0.205323	-2.68401	0.00727443	0.0790461	Protein FAM82B	#N/A	#N/A	#N/A	#N/A	21.0008	2.95261	0.00145369	-0.1627	0.914773	3.11531	0.00067826
Smp_019310	1161.64	-0.456051	0.175763	-2.5947	0.0094674	0.09818	dynein light chain	#N/A	#N/A	#N/A	#N/A	34.8539	2.93942	2.83e-08	-1.2181	0.0851762	4.15752	9.36e-13
Smp_005470	28.6159	-0.317911	0.389139	-0.816959	0.413952	0.92748	dynein light chain	#N/A	#N/A	#N/A	#N/A	3.50276	2.90811	0.029932	0.474502	0.80547	2.43361	0.06392
Smp_039590	84.1898	-0.457868	0.333611	-1.37246	0.16992	0.678496	hypothetical protein	#N/A	#N/A	#N/A	#N/A	21.0296	2.90407	0.00843185	-0.0366703	0.987128	2.94074	0.00658345
Smp_176050	501.043	-0.51551	0.216799	-2.37782	0.0174153	0.157299	ras protein RABH1b	#N/A	#N/A	#N/A	#N/A	22.9468	2.87834	0.000859471	-0.637372	0.599381	3.51572	4.91e-05
Smp_074430	874.69	-0.192483	0.631335	-0.304882	0.760456	0.999981	hypothetical protein	#N/A	#N/A	#N/A	#N/A	5.592	2.85017	0.0152085	0.858054	0.561795	1.99212	0.0886942
Smp_102400	912.911	-0.240359	0.154501	-1.55571	0.119776	0.573046	galactosyltransferase	#N/A	#N/A	#N/A	#N/A	7.34199	2.84339	0.0227015	0.281431	0.880501	2.56196	0.0369147
Smp_119260	98.8181	-1.26637	0.377962	-3.35051	0.000806619	0.0131087	hypothetical protein	#N/A	#N/A	#N/A	#N/A	4.23656	2.83029	0.0269896	0.563443	0.74684	2.26684	0.0737056
Smp_131630	29.2296	0.264639	0.38479	0.68775	0.49161	0.961947	testis expressed protein 14	#N/A	#N/A	#N/A	#N/A	6.16192	2.79719	0.0309307	-1.21417	0.442453	4.01136	0.00144258
Smp_187140	7827.29	-0.000795009	0.246765	-0.00322172	0.997429	0.999981	cathepsin L proteinase	#N/A	#N/A	#N/A	#N/A	12.8981	2.77604	0.00380872	-1.66769	0.147213	4.44373	5.98e-06
Smp_195060	2999.94	-0.59186	0.221305	-2.67441	0.00748611	0.0808519	hypothetical protein	#N/A	#N/A	#N/A	#N/A	21.3886	2.75947	0.000306452	0.141615	0.910792	2.61786	0.000530816
Smp_179570	884.855	0.0325462	0.161988	0.200918	0.840763	0.999981	otopetrin	#N/A	#N/A	#N/A	#N/A	12.1117	2.75571	0.00727454	-1.33324	0.283875	4.08895	6.2e-05
Smp_203440	71.2102	-1.76702	0.372929	-4.73821	2.16e-06	8.09e-05	hypothetical protein	#N/A	#N/A	#N/A	#N/A	4.36433	2.75363	0.0117135	-1.87229	0.181019	4.62592	8.31e-05
Smp_201730	282.645	0.0228637	0.28271	0.0808732	0.935543	0.999981	hypothetical protein	#N/A	#N/A	#N/A	#N/A	11.2144	2.74807	0.000539621	-0.482243	0.679409	3.23031	5.08e-05
Smp_149550	86.0385	-0.437706	0.276099	-1.58532	0.112893	0.556821	hypothetical protein	#N/A	#N/A	#N/A	#N/A	5.39247	2.74405	0.0391815	-1.37091	0.392148	4.11495	0.00151582
Smp_158550	2141.61	-0.547885	0.14244	-3.84644	0.000119848	0.00260843	semaphorin 5A	#N/A	#N/A	#N/A	#N/A	22.9289	2.72623	0.00197833	-1.05017	0.344072	3.77641	1.92e-05
Smp_057410	2940.47	-0.172266	0.752342	-0.228973	0.81889	0.999981	#N/A	#N/A	#N/A	#N/A	#N/A	28.1082	2.70227	1.12e-05	-2.14812	0.0060665	4.85039	5.71e-12
Smp_166170	1858.94	-0.418827	0.181664	-2.30551	0.0211382	0.180446	hypothetical protein	#N/A	#N/A	#N/A	#N/A	27.4101	2.69395	4.03e-05	-0.216338	0.837124	2.91028	8.37e-06
Smp_202970	5652.02	-0.36415	0.241232	-1.50954	0.131161	0.594721	cytoplasmic actin	#N/A	#N/A	#N/A	#N/A	31.118	2.68776	4.28e-07	0.667694	0.318442	2.02006	8.62e-05
Smp_127370	432.408	-0.283197	0.220919	-1.28191	0.199876	0.735272	glycosyltransferase 14 family member	#N/A	#N/A	#N/A	#N/A	6.12065	2.68161	0.0362223	-1.26337	0.414377	3.94498	0.00152425
Smp_074450	1087.85	-0.252459	0.151128	-1.6705	0.0948209	0.504128	hypothetical protein	#N/A	#N/A	#N/A	#N/A	10.5545	2.67022	0.00199115	-0.687716	0.568566	3.35794	0.00011966
Smp_180620	333.923	-2.37715	0.234261	-10.1474	3.4e-24	1.17e-21	MEG 17	#N/A	#N/A	#N/A	#N/A	7.35589	2.66771	0.0107679	-1.53396	0.251794	4.20167	0.000134782
Smp_154360	1379.61	-0.219162	0.28772	-0.76172	0.446227	0.947946	cation transporting atpase worm	#N/A	#N/A	#N/A	#N/A	7.60848	2.63597	0.0135512	0.753655	0.579188	1.88231	0.0762218
Smp_102780	156.116	-0.254382	0.389101	-0.653768	0.513261	0.972343	N methyl D aspartate receptor associated	#N/A	#N/A	#N/A	#N/A	5.60912	2.63559	0.0274761	-0.255314	0.891878	2.8909	0.0138856
Smp_045010	1996.22	-0.699523	0.181424	-3.85574	0.000115379	0.0025304	tegument-allergen-like protein	#N/A	#N/A	#N/A	#N/A	26.1772	2.63433	4.13e-05	-0.763759	0.375809	3.39809	2.48e-07
Smp_056460	756.135	-3.8408	0.362818	-10.586	3.46e-26	1.42e-23	hypothetical protein	#N/A	#N/A	#N/A	#N/A	13.3778	2.63411	0.0122035	-0.260183	0.871386	2.8943	0.00494583
Smp_147070	1052.09	-0.46344	0.324407	-1.42857	0.153127	0.642986	sodium coupled neutral amino acid	#N/A	#N/A	#N/A	#N/A	22.4199	2.62662	0.00114619	-3.1161	0.00165315	5.74272	4.79e-10
Smp_204720	146.961	-0.808462	0.229887	-3.51679	0.000436807	0.00788207	SAM pointed domain containing ETS transcription	#N/A	#N/A	#N/A	#N/A	6.95155	2.61506	0.0277939	-1.55609	0.276698	4.17115	0.000455532
Smp_125220	40.167	-0.337051	0.336461	-1.00175	0.316462	0.862173	Aquaporin 9 (AQP 9) (Small solute channel 1)	#N/A	#N/A	#N/A	#N/A	4.1976	2.59858	0.0277628	0.320678	0.858465	2.2779	0.0476374
Smp_117920	154.699	-1.45462	0.268131	-5.42503	5.79e-08	3.11e-06	steroid dehydrogenase	#N/A	#N/A	#N/A	#N/A	16.3767	2.58701	0.000242959	-1.95785	0.0290821	4.54486	9.66e-09
Smp_001050	17.8254	0.730405	0.514452	1.41977	0.155674	0.648416	protein C20orf152	#N/A	#N/A	#N/A	#N/A	10.7704	2.58472	0.00560813	-0.555986	0.669707	3.14071	0.000662769
Smp_130370	172.873	0.364343	0.457733	0.795974	0.426047	0.937846	elongation of very long chain fatty acids	#N/A	#N/A	#N/A	#N/A	10.4538	2.57073	0.000386515	0.36231	0.732883	2.20842	0.00188971
Smp_144450	1830.18	0.030429	0.134474	0.226282	0.820982	0.999981	apobec 1 complementation factor	#N/A	#N/A	#N/A	#N/A	13.4005	2.50399	0.0349978	-3.12651	0.0137873	5.6305	1.88e-06
Smp_130930	330.55	-0.705034	0.249785	-2.82256	0.00476422	0.0564938	multiple C2 and transmembrane domain containing protein	#N/A	#N/A	#N/A	#N/A	22.548	2.50188	0.0018378	-3.42756	0.000409464	5.92944	9.32e-11
Smp_056370	1587.53	0.211145	0.140007	1.50811	0.131527	0.595127	deoxyhypusine hydroxylase:monooxygenase	5	-1.08026	-0.472418	1.55268	130.376	4.12244	NA	0.973683	NA	3.14875	NA
Smp_189450	772.29	-0.102617	0.128174	-0.800603	0.423362	0.934679	#N/A	#N/A	#N/A	#N/A	#N/A	11.0418	2.49821	0.0223021	0.17966	0.914934	2.31855	0.0310933
Smp_131430	864.773	-0.635205	0.245429	-2.58814	0.00964952	0.0994687	steroid dehydrogenase	#N/A	#N/A	#N/A	#N/A	6.82138	2.48594	0.0320654	0.194651	0.913501	2.29129	0.0439527
Smp_166530	5746.03	0.0373956	0.355993	0.105046	0.916339	0.999981	phospholipase A	#N/A	#N/A	#N/A	#N/A	17.2375	2.47397	0.00251093	-1.92591	0.0448167	4.39988	2.6e-07
Smp_152580	1360.83	-0.489172	0.19865	-2.46249	0.0137977	0.13328	MEG-5	#N/A	#N/A	#N/A	#N/A	19.4756	2.46206	0.000290465	-2.1439	0.0108312	4.60596	1.34e-09
Smp_214210	466.119	0.226728	0.140268	1.61639	0.10601	0.534841	rhoptry protein	#N/A	#N/A	#N/A	#N/A	12.7296	2.37174	0.00476023	-2.61885	0.00919913	4.99058	6.97e-08
Smp_135210	1100.3	-0.766099	0.323728	-2.36649	0.0179578	0.160649	Multiple epidermal growth factor domains	#N/A	#N/A	#N/A	#N/A	9.01868	2.35065	0.0483713	-1.22229	0.394762	3.57294	0.0021789
Smp_198930	2809.06	-0.604505	0.318029	-1.90078	0.0573305	0.365617	hypothetical protein	#N/A	#N/A	#N/A	#N/A	17.5251	2.35031	0.0117111	-2.21919	0.0582512	4.56949	1.13e-05
Smp_163530	1806.4	-0.0704281	0.170092	-0.414059	0.678831	0.999981	#N/A	#N/A	#N/A	#N/A	#N/A	12.8806	2.26341	0.0146016	-1.72628	0.10337	3.98968	1.79e-05
Smp_064910	257.443	0.085926	0.188754	0.455227	0.648946	0.999981	hypothetical protein	#N/A	#N/A	#N/A	#N/A	8.72627	2.25889	0.0122002	0.330921	0.800157	1.92797	0.0298961
Smp_131900	945.128	-0.521285	0.300766	-1.73319	0.0830613	0.46503	#N/A	#N/A	#N/A	#N/A	#N/A	22.0879	2.20553	0.00158351	-0.65485	0.470841	2.86038	3.61e-05
Smp_161340	40.5094	2.16276	0.388151	5.57197	2.52e-08	1.47e-06	Sm29	#N/A	#N/A	#N/A	#N/A	15.4438	2.04402	0.0100295	-2.56905	0.0136703	4.61308	1.4e-06
Smp_015020	1591.63	-0.776375	0.360784	-2.15191	0.0314042	0.241702	sodium potassium transporting ATPase alpha subunit	#N/A	#N/A	#N/A	#N/A	31.6532	1.92296	0.0309288	-0.171415	0.899886	2.09438	0.015866
Smp_145660	518.87	-0.204591	0.151785	-1.3479	0.177692	0.693825	#N/A	#N/A	#N/A	#N/A	#N/A	13.5334	1.87447	0.0223917	-0.930053	0.359767	2.80452	0.000652157
Smp_058480	238.42	0.590194	0.187251	3.15189	0.00162216	0.0234382	high affinity cAMP specific 3' 5' cyclic	#N/A	#N/A	#N/A	#N/A	23.7566	1.85951	0.0494848	-2.56609	0.0082995	4.4256	1.26e-06
Smp_187230	965.267	-0.266828	0.214336	-1.24491	0.213166	0.751787	#N/A	#N/A	#N/A	#N/A	#N/A	18.3638	1.85729	0.0124416	-1.58487	0.0554563	3.44215	3.52e-06
Smp_172720	368.814	-0.0647224	0.161767	-0.400096	0.689086	0.999981	hypothetical protein	#N/A	#N/A	#N/A	#N/A	9.12208	1.83628	0.0222812	-0.173759	0.889451	2.01004	0.0108396
Smp_014410	18.1848	-0.216505	0.564203	-0.383735	0.701175	0.999981	hypothetical protein	#N/A	#N/A	#N/A	#N/A	12.8015	1.75785	0.0225803	-0.368662	0.728812	2.12651	0.00473412
Smp_176130	76.0545	-0.257472	0.243467	-1.05752	0.290274	0.839366	plasma membrane calcium transporting ATPase	#N/A	#N/A	#N/A	#N/A	14.3121	1.74751	0.0393773	-0.526768	0.630229	2.27428	0.00547627
Smp_210960	814.948	0.108707	0.261066	0.416396	0.67712	0.999981	TAF13 RNA polymerase II, TATA box binding	#N/A	#N/A	#N/A	#N/A	22.1182	1.70719	0.0255168	-0.407609	0.688961	2.1148	0.00430047
Smp_211190	599.558	0.0463076	0.132701	0.348961	0.727118	0.999981	RNA (guanine 9) methyltransferase	#N/A	#N/A	#N/A	#N/A	22.1402	1.53231	0.0328562	-0.156093	0.884159	1.6884	0.0155467
Smp_151440	49.3828	-2.06071	0.337511	-6.1056	1.02e-09	8.55e-08	hypothetical protein	14	-0.55755	-3.41772	3.97527	427.909	6.6617	9.38e-51	-3.26672	4.07e-06	9.92843	8.17e-53
Smp_200180	716.608	-0.983419	0.15056	-6.53174	6.5e-11	6.82e-09	dynein light chain	14	-1.3175	-1.94142	3.25892	680.187	6.54925	2.35e-54	-0.77308	0.183799	7.32233	3.48e-61
Smp_194980	14544.4	-0.864203	0.365577	-2.36394	0.0180817	0.161421	25 kDa integral membrane protein	14	-1.29772	-1.56482	2.86254	487.749	5.94917	3.62e-42	-0.241315	0.743952	6.19048	2.72e-44
Smp_176940	954.035	-1.58594	0.159247	-9.95904	2.3e-23	7.61e-21	cationic amino acid transporter	14	-0.667935	-2.68732	3.35526	972.545	5.88423	2.94e-66	-2.67567	4.25e-10	8.5599	1.5e-101
Smp_163720	11762.3	-0.621778	0.180106	-3.45229	0.000555843	0.0096537	endophilin B1	14	-0.805876	-2.31664	3.12251	768.542	5.78505	6.75e-103	-1.98016	1.37e-08	7.76521	1.88e-132
Smp_181470	3312.03	-0.278582	0.153375	-1.81635	0.0693169	0.41433	NMDA receptor glutamate binding chain	14	-1.10525	-1.6909	2.79615	256.512	5.67576	5.33e-34	-0.662425	0.320002	6.33819	5.88e-39
Smp_163820	372.309	-1.03824	0.215323	-4.82177	1.42e-06	5.66e-05	phospholipid transporting ATPase IF	14	-0.468253	-2.9486	3.41685	250.64	5.64253	6.73e-34	-3.04202	5.13e-06	8.68455	1.18e-45
Smp_040680	1345.82	-1.29561	0.225832	-5.73706	9.63e-09	6.29e-07	dynein light chain	14	-0.318397	-3.14182	3.46022	1133.13	5.58501	9.75e-47	-3.69267	4.36e-14	9.27769	5.45e-88
Smp_022450	345.946	-1.75266	0.407413	-4.30194	1.69e-05	0.000474131	hypothetical protein	14	-0.903727	-2.28229	3.18602	104.958	5.58275	1.17e-21	-1.44822	0.11062	7.03097	1.93e-23
Smp_195040	14312.2	-0.831666	0.329422	-2.52462	0.0115822	0.115782	plastin 2	14	-1.06348	-1.56422	2.6277	188.837	5.33304	5.36e-49	-0.596143	0.275866	5.92918	8.17e-53
Smp_059600	60.5593	-1.0004	0.30062	-3.32778	0.000875395	0.0140145	tektin 3	14	-0.604753	-2.42106	3.02581	327.942	5.16824	1.21e-26	-2.30402	8.75e-05	7.47227	2.8e-44
Smp_045200	28080	-0.429723	0.200699	-2.14113	0.0322639	0.245463	tegument-allergen-like protein	14	-0.888086	-1.7095	2.59759	199.257	5.06102	3.33e-46	-1.02049	0.0432353	6.0815	3.4e-52
Smp_035550	126.434	-0.627383	0.39805	-1.57614	0.114993	0.561512	hypothetical protein	14	0.631543	-4.61822	3.98668	33.7714	4.87835	1.66e-15	-3.34922	0.00192095	8.22757	1.4e-17
Smp_081430	2805.52	-0.657167	0.343426	-1.91356	0.0556761	0.359458	retinol dehydrogenase 11	14	-0.877098	-1.62705	2.50415	104.055	4.85617	6.74e-28	-0.868897	0.192995	5.72506	3.72e-31
Smp_148100	963.71	-0.559983	0.115717	-4.83926	1.3e-06	5.26e-05	hypothetical protein	14	-0.924858	-2.06159	2.98644	207.061	4.85492	1.58e-06	-1.28007	0.303245	6.135	6.79e-10
Smp_091870	1766.74	-0.687812	0.229089	-3.00237	0.00267882	0.0348937	hypothetical protein	14	-0.462186	-2.38137	2.84356	502.764	4.84809	3.01e-23	-2.47644	6.91e-06	7.32452	3.1e-46
Smp_136650	844.49	0.150199	0.382208	0.392976	0.694337	0.999981	#N/A	14	0.813727	-4.76454	3.95081	49.3956	4.53831	1.31e-16	-3.55257	0.000373883	8.09087	4.96e-19
Smp_081190	1129.74	-0.549826	0.153057	-3.5923	0.000327777	0.00620682	GTP binding protein rhoA	14	-0.684796	-1.77122	2.45602	71.4462	4.51971	6.08e-20	-1.25744	0.082891	5.77715	7.05e-24
Smp_129350	1476.89	-0.709298	0.31996	-2.21683	0.0266345	0.213997	ras and EF hand domain containing protein	14	-0.481623	-1.98535	2.46697	181.297	4.29603	2.08e-35	-1.91625	3.98e-05	6.21228	2.31e-50
Smp_093160	921.608	-0.600674	0.239281	-2.51034	0.0120617	0.119463	STARP antigen	14	-0.278929	-2.31939	2.59832	280.308	4.15198	4.3e-15	-2.61688	1.43e-05	6.76886	2.3e-33
Smp_170960	791.042	-0.176149	0.192781	-0.913728	0.36086	0.894037	serine rich repeat protein	14	0.0242605	-3.05645	3.03219	188.543	4.05719	1.28e-06	-3.48112	0.000137325	7.53831	1.6e-18
Smp_176650	376.003	-0.831419	0.322777	-2.57583	0.00999999	0.102345	hypothetical protein	14	-0.146498	-2.46885	2.61535	549.295	3.9813	1.23e-17	-3.08556	1.8e-09	7.06686	2.79e-47
Smp_136660	2131.75	0.074934	0.188888	0.396712	0.69158	0.999981	pro neuregulin 2	14	-0.104735	-2.46413	2.56886	89.7515	3.76034	8.95e-08	-2.70269	0.00114772	6.46303	2.35e-17
Smp_045360	7191.31	-0.603595	0.286663	-2.10559	0.03524	0.262757	calsyntenin 2	14	-0.164777	-2.21309	2.37787	745.13	3.71798	3.19e-16	-2.72483	1.61e-08	6.44281	1.31e-44
Smp_093780	84.0312	-0.0204954	0.272193	-0.0752973	0.939978	0.999981	peroxiredoxins, prx 1, prx 2, prx 3	14	-0.0557645	-2.32555	2.38131	186.451	3.71498	1.19e-18	-2.92741	1.1e-07	6.64238	6.89e-38
Smp_172250	5041.29	-0.842531	0.380759	-2.21277	0.0269138	0.215636	inositol 5 phosphatase	14	-0.114624	-2.42501	2.53963	268.772	3.67131	9.7e-09	-2.9343	2.47e-05	6.6056	7.05e-24
Smp_212420	657.611	-0.579438	0.30398	-1.90617	0.0566281	0.362226	SH3 domain containing kinase binding protein 1	14	-0.062027	-2.54432	2.60635	181.223	3.66274	1.65e-06	-2.99159	0.000315384	6.65433	1.06e-17
Smp_211310	352.41	-0.737833	0.162608	-4.5375	5.69e-06	0.000186079	soluble guanylate cyclase gcy	14	0.167617	-2.58043	2.41282	43.578	3.20457	3.35e-06	-3.26229	0.000146104	6.46686	8.08e-16
Smp_081900	2532.74	-0.241881	0.186288	-1.29843	0.19414	0.726621	hypothetical protein	14	0.0917104	-2.26373	2.17202	1125.77	3.17166	1.5e-18	-3.18185	3.68e-17	6.35351	3.88e-67
Smp_137370	2500.67	-0.775911	0.6037	-1.28526	0.198701	0.732443	cyclin dependent kinase 16	14	0.521499	-2.92814	2.40664	149.869	2.74545	2.51e-05	-4.26414	6.4e-09	7.00959	5.22e-23
Smp_125810	303.766	-0.618857	0.198851	-3.11216	0.00185724	0.0260892	zinc finger protein 112	13	-3.7387	1.32713	2.41157	386.607	8.5931	1.36e-66	7.0288	1.33e-44	1.56431	7.06e-07
Smp_006730	4280.92	-0.524366	0.126946	-4.13062	3.62e-05	0.000945362	DNA damage regulated autophagy modulator protein	13	-2.10558	0.250548	1.85503	128.745	5.50221	4.51e-24	3.27505	5.7e-09	2.22716	4.54e-06
Smp_143750	715.292	-0.274543	0.259318	-1.05871	0.289732	0.839226	transmembrane protein 63A	13	-2.03602	0.457168	1.57885	207.837	5.38052	1.08e-46	3.66271	8.46e-22	1.71781	6.98e-07
Smp_131990	1849.33	0.0676409	0.177296	0.381514	0.702822	0.999981	Growth arrest specific protein 2 3	13	-1.71417	0.286206	1.42796	354.623	4.59114	1.64e-30	2.95431	4.52e-13	1.63683	6.25e-05
Smp_095360	55509.3	-0.23895	0.25521	-0.936287	0.349125	0.888396	14 kDa fatty acid-binding protein	13	-1.46521	0.12458	1.34063	4000.55	4.03978	3.02e-23	2.32784	2.52e-08	1.71194	6.05e-05
Smp_194840	6023.9	0.0013818	0.158057	0.00874237	0.993025	0.999981	Niemann Pick C2 protein	13	-1.1855	-0.0154071	1.2009	265.543	3.49142	5.3e-16	1.7946	6.49e-05	1.69682	0.000120198
Smp_051080	2109.73	-0.418901	0.127033	-3.29759	0.000975194	0.015383	clathrin light chain	13	-1.01197	-0.0162211	1.02819	758.153	3.11525	2.98e-44	1.54886	1.88e-11	1.56638	3.01e-12
Smp_153490	931.759	-0.378013	0.159248	-2.37373	0.0176093	0.15852	GDP mannose 4,6 dehydratase	13	-0.97246	-0.031694	1.00415	543.393	3.09234	3.48e-15	1.46008	0.000407653	1.63226	5.52e-05
Smp_156620	1636.19	-0.350165	0.275644	-1.27035	0.203959	0.74164	integrin alpha 7	8	-1.62072	0.0441184	1.5766	73.6973	4.33124	5.67e-08	2.33091	0.00559597	2.00032	0.0152112
Smp_035700	1187.11	0.0355135	0.227177	0.156325	0.875776	0.999981	adenosine deaminase	8	-1.12394	-0.337696	1.46164	406.874	3.84554	2.78e-31	1.24474	0.000493401	2.60081	2.79e-15
Smp_158350	1568.02	-0.43321	0.127454	-3.39894	0.000676467	0.0113144	integrin alpha 7	8	-1.21174	-0.313035	1.52477	45.6456	3.73053	2.08e-06	1.22567	0.180705	2.50486	0.0014999
Smp_172750	2618.03	-0.48584	0.20176	-2.40801	0.0160399	0.149723	cation transporting atpase worm	8	-1.22295	-0.310362	1.53332	31.1314	3.65321	8.39e-08	1.2696	0.106019	2.38361	0.000339309
Smp_131230	315.361	-0.142355	0.180041	-0.79068	0.429131	0.940429	F box:WD repeat containing protein 10	8	-1.22651	-0.338852	1.56536	26.5043	3.5117	0.000117516	1.23367	0.248463	2.27803	0.0135457
Smp_136180	698.681	-0.198485	0.158908	-1.24906	0.211644	0.751787	dna polymerase eta	8	-1.02985	-0.339972	1.36982	248.942	3.45272	2.49e-10	1.0583	0.0884813	2.39441	1.36e-05
Smp_150970	3089.47	-0.0936382	0.122916	-0.761804	0.446177	0.947946	RAB6 interacting protein 2 (ERC protein 1)	8	-0.975591	-0.3727	1.34829	334.796	3.44996	2.8e-11	0.973605	0.10219	2.47635	2.13e-06
Smp_089240	3625.16	-0.278044	0.216663	-1.2833	0.199387	0.734082	alpha 1,6 mannosyl glycoprotein	8	-0.82423	-0.552534	1.37676	495.484	3.32888	4.82e-32	0.522716	0.125472	2.80617	1.82e-23
Smp_079860	3322.77	-0.445778	0.13842	-3.22048	0.00127978	0.0192447	o acyltransferase (membrane bound) domain	8	-0.978343	-0.264279	1.24262	1091.7	3.31783	1.69e-47	1.14232	2.48e-06	2.1755	2.52e-21
Smp_059980	3403.43	-0.249724	0.206152	-1.21136	0.225758	0.771256	arginase	8	-0.984329	-0.421155	1.40548	154.506	3.31271	5.8e-10	0.870935	0.166349	2.44178	5.28e-06
Smp_137520	86.8715	-0.342278	0.260154	-1.31568	0.188282	0.715339	threonine dehydratase:deaminase	8	-0.898494	-0.327254	1.22575	106.623	3.20867	2.59e-19	0.927067	0.0218896	2.2816	6.18e-11
Smp_213700	434.681	-0.320946	0.158547	-2.0243	0.0429397	0.302415	methyltransferase, putative	8	-0.8325	-0.395874	1.22837	46.918	3.19685	3.62e-09	0.769707	0.246043	2.42715	5.42e-06
Smp_176190	390.517	0.20511	0.175047	1.17174	0.241302	0.789973	#N/A	8	-0.80309	-0.52242	1.32551	116.101	3.16671	6.21e-23	0.546649	0.170769	2.62006	7.88e-17
Smp_149420	2624.33	-0.477215	0.153362	-3.11168	0.00186026	0.0260892	held out wings	8	-0.992453	-0.298956	1.29141	605.041	3.16276	1.27e-06	1.08664	0.144444	2.07612	0.00199581
Smp_098320	397.215	-0.807392	0.196131	-4.1166	3.85e-05	0.000992668	inositol tetrakisphosphate kinase	8	-0.714248	-0.647996	1.36224	196.867	3.14966	1.46e-20	0.194196	0.706643	2.95546	1.46e-18
Smp_165420	3061.15	-0.0832395	0.126303	-0.659047	0.509866	0.971601	zinc finger protein	8	-0.820919	-0.461444	1.28236	404.299	3.10413	3.51e-25	0.624376	0.0741352	2.47975	8.72e-17
Smp_126290	376.293	-0.596815	0.281404	-2.12084	0.0339349	0.255016	hypothetical protein	8	-0.739166	-0.673872	1.41304	107.032	3.06574	4.42e-07	0.229553	0.80547	2.83619	2.56e-06
Smp_017860	274.942	-0.00163073	0.160097	-0.0101859	0.991873	0.999981	hypothetical protein	8	-0.791266	-0.403984	1.19525	366.642	3.01179	1.95e-46	0.692644	0.00329792	2.31915	5.29e-29
Smp_051000	1277.13	0.062474	0.129983	0.480631	0.630779	0.997803	coiled coil domain containing protein 132	8	-0.893523	-0.239109	1.13263	367.245	2.98889	9.83e-11	1.0464	0.0409796	1.94249	3.61e-05
Smp_061970	484.801	-0.908166	0.217893	-4.16794	3.07e-05	0.000805614	GPI ethanolamine phosphate transferase 2	8	-0.742174	-0.540332	1.28251	128.396	2.9851	9.68e-14	0.362143	0.51182	2.62296	3.85e-11
Smp_154840	1558.41	0.123382	0.12194	1.01183	0.311619	0.858298	hypothetical protein	8	-0.911573	-0.138957	1.05053	397.921	2.98226	1.74e-42	1.24483	5.52e-08	1.73743	9.17e-16
Smp_026320	2447.51	-0.166271	0.14335	-1.1599	0.246091	0.793553	hypothetical protein	8	-0.704174	-0.49346	1.19763	170.668	2.96927	2.94e-08	0.428337	0.554661	2.54093	1.95e-06
Smp_075870	5257.33	-0.00865512	0.110556	-0.0782873	0.9376	0.999981	Translocation associated membrane protein 1	8	-0.852868	-0.212248	1.06512	1632.2	2.91646	1.75e-31	1.06163	6.26e-05	1.85483	2e-13
Smp_125160	3234.22	-0.0964941	0.150557	-0.640915	0.521578	0.976482	smoothened	8	-0.806798	-0.334303	1.1411	218.88	2.89931	6.13e-07	0.797853	0.248875	2.10146	0.000369427
Smp_126120	2682.03	-0.566597	0.342082	-1.65632	0.0976577	0.511858	LAMA protein 2	8	-0.983836	-0.267455	1.25129	22.8882	2.89436	0.00347751	1.06576	0.360589	1.8286	0.0718244
Smp_147240	2244.28	-0.122814	0.133665	-0.91882	0.35819	0.893988	mitogen activated protein kinase binding protein	8	-0.5885	-0.676725	1.26522	128.191	2.8692	4.13e-06	0.00859242	0.99776	2.86061	3.53e-06
Smp_150940	1245.06	-0.211358	0.188921	-1.11876	0.263242	0.813644	zinc finger protein 608	8	-1.02735	-0.0955477	1.1229	31.4954	2.8615	0.000205457	1.28491	0.134552	1.57659	0.0461228
Smp_155920	2631.68	-0.00144415	0.19981	-0.00722759	0.994233	0.999981	high density lipoprotein receptor (hdl)	8	-0.847072	-0.238132	1.0852	217.395	2.84632	4.44e-10	0.96501	0.058748	1.88131	4.71e-05
Smp_132770	1359.4	0.0043867	0.160486	0.0273339	0.978193	0.999981	E3 ubiquitin protein ligase RNF19	8	-0.634596	-0.542171	1.17677	311.897	2.83912	1.37e-18	0.252965	0.579248	2.58615	7.04e-16
Smp_132850	3013.34	-0.171402	0.146999	-1.16601	0.24361	0.791943	1 acylglycerophosphocholine O acyltransferase	8	-0.764084	-0.3647	1.12878	585.141	2.82932	1.88e-11	0.720618	0.143023	2.10871	6.93e-07
Smp_127820	2990.08	-0.543948	0.237388	-2.29139	0.0219408	0.18602	hypothetical protein	8	-0.846543	-0.248392	1.09494	364.221	2.80737	2.8e-09	0.971752	0.0659702	1.83562	0.000137904
Smp_163950	3155.09	-0.0508052	0.135527	-0.374872	0.707755	0.999981	hypothetical protein	8	-0.9279	-0.15515	1.08305	229.28	2.80685	1.56e-05	1.14724	0.114282	1.65961	0.0141008
Smp_170110	5418.05	-0.118626	0.318735	-0.372178	0.70976	0.999981	high density lipoprotein binding protein	8	-0.781322	-0.267322	1.04864	234.632	2.76512	1.1e-10	0.874647	0.0705992	1.89047	1.26e-05
Smp_092950	2695.84	-0.0456307	0.166972	-0.273284	0.784635	0.999981	protein osteopotentia	8	-0.658128	-0.519742	1.17787	172.211	2.76189	3.24e-08	0.313525	0.657096	2.44836	8.46e-07
Smp_038330	550.298	-0.362811	0.131737	-2.75406	0.0058861	0.0664952	nogo B receptor	8	-0.545595	-0.758608	1.3042	191.329	2.76122	1.88e-19	-0.162494	0.732239	2.92371	8.98e-22
Smp_123010	5605.56	0.212157	0.154081	1.37692	0.168537	0.676429	high affinity cationic amino acid transporter 1	8	-0.546491	-0.840015	1.38651	113.561	2.75542	1.44e-07	-0.253708	0.744726	3.00913	5.66e-09
Smp_126550	732.008	-0.516989	0.215443	-2.39966	0.0164105	0.15196	#N/A	8	-0.56454	-0.55539	1.11993	107.193	2.74976	1.04e-07	0.123658	0.884059	2.62611	2.97e-07
Smp_131310	1460.99	-0.256674	0.133044	-1.92925	0.0537004	0.349952	hypothetical protein	8	-0.738646	-0.241893	0.980538	97.4539	2.74618	3.12e-05	0.792592	0.317886	1.95359	0.00361308
Smp_131320	247.273	-0.210507	0.174401	-1.20703	0.22742	0.771256	myst histone acetyltransferase	8	-0.749432	-0.275612	1.02504	82.9334	2.74374	9.15e-07	0.784756	0.237515	1.95898	0.000512865
Smp_176670	877.861	0.121933	0.152699	0.798518	0.42457	0.936167	histone H2A	8	-0.662218	-0.498786	1.161	43.4217	2.71257	0.000218812	0.305483	0.777069	2.40709	0.000993373
Smp_167230	2186.3	0.00731109	0.12046	0.0606931	0.951604	0.999981	golgi resident protein gcp60	8	-0.487082	-0.816931	1.30401	68.3711	2.70308	1.83e-12	-0.326152	0.556909	3.02924	3.29e-15
Smp_176270	749.981	-0.381614	0.166841	-2.2873	0.0221785	0.187297	syntaxin 5	8	-0.561329	-0.697914	1.25924	169.307	2.68621	2.8e-10	-0.0330379	0.967658	2.71924	1.06e-10
Smp_007190	2425.71	-0.17794	0.135735	-1.31094	0.189879	0.717736	lariat debranching enzyme	8	-0.71636	-0.430761	1.14712	114.778	2.67652	2.51e-08	0.551896	0.361753	2.12463	8.77e-06
Smp_044750	9727.54	-0.352895	0.324179	-1.08858	0.276339	0.823487	marvel containing potential lipid	8	-0.724541	-0.380727	1.10527	213.006	2.67166	8.91e-14	0.649294	0.123181	2.02236	1.48e-08
Smp_213690	2280.96	-0.11324	0.140684	-0.804924	0.420864	0.932757	hypothetical protein	8	-0.717068	-0.35458	1.07165	482.445	2.65874	9.68e-11	0.605483	0.219024	2.05325	6.68e-07
Smp_081570	2978.25	0.00244565	0.151793	0.0161117	0.987145	0.999981	staphylococcal nuclease domain containing protein	8	-0.750624	-0.247293	0.997917	429.641	2.65633	5.96e-25	0.841353	0.00272968	1.81498	1.67e-12
Smp_129050	6993.2	-0.266315	0.23668	-1.12521	0.260499	0.812299	dynamin 1	8	-0.601692	-0.54556	1.14725	236.291	2.65305	5.13e-27	0.235906	0.493853	2.41714	4.65e-23
Smp_181050	6813.41	-0.289707	0.274279	-1.05625	0.290854	0.839366	hypothetical protein	8	-0.782119	-0.196457	0.978576	431.142	2.65285	9.12e-08	0.960217	0.083629	1.69264	0.000901242
Smp_077560	1156.26	-0.410785	0.154536	-2.65818	0.0078565	0.0842174	Hippocampus abundant transcript 1 protein	8	-0.639718	-0.426309	1.06603	221.369	2.64382	1.16e-18	0.439175	0.23834	2.20464	1.26e-13
Smp_057130	5922.2	-0.47174	0.16051	-2.93902	0.00329253	0.0416877	adiponectin receptor protein 2	8	-0.565812	-0.620174	1.18599	1077.11	2.61875	4.74e-15	0.0686112	0.903951	2.55014	1.46e-14
Smp_018760	7557.01	-0.265614	0.128639	-2.0648	0.0389418	0.281803	neutral alpha glucosidase AB	8	-0.625079	-0.493004	1.11808	2901.29	2.61145	3.57e-26	0.314604	0.317185	2.29685	1.14e-20
Smp_136370	382.544	0.0233817	0.209477	0.11162	0.911125	0.999981	hypothetical protein	8	-0.51171	-0.89856	1.41027	122.259	2.59939	0.000297172	-0.445726	0.648452	3.04512	1.4e-05
Smp_210070	2297.3	-0.308	0.122089	-2.52274	0.0116444	0.116268	integrator complex subunit	8	-0.696227	-0.282501	0.978728	302.717	2.59035	7.1e-05	0.706002	0.374126	1.88435	0.004661
Smp_162650	585.381	-0.436096	0.142975	-3.05015	0.00228727	0.0310152	anoctamin 10	8	-0.473325	-0.555031	1.02836	66.9954	2.58848	8.27e-05	0.0334512	0.979015	2.55503	8.68e-05
Smp_011270	14570.9	0.123542	0.170088	0.726344	0.467628	0.953416	sj ts4 protein	8	-0.571512	-0.566469	1.13798	464.091	2.57201	8.71e-23	0.146573	0.712277	2.42543	1.23e-20
Smp_134990	131.495	-0.412621	0.278644	-1.48082	0.138655	0.611125	oxalate:formate antiporter	8	-0.450454	-0.823115	1.27357	29.557	2.56657	0.000947686	-0.429767	0.693691	2.99634	8.61e-05
Smp_212490	6891.57	0.0916383	0.192695	0.475562	0.634386	0.998794	protein transport protein Sec31A	8	-0.720595	-0.343026	1.06362	155.484	2.54418	3.13e-06	0.671935	0.308725	1.87225	0.00070619
Smp_198280	661.131	-0.331095	0.184896	-1.79071	0.0733403	0.43038	#N/A	8	-0.617999	-0.413258	1.03126	219.964	2.54386	3.46e-27	0.440323	0.122329	2.10354	1.58e-19
Smp_042770	495.676	-0.171468	0.163874	-1.04634	0.295404	0.841969	TBC1 domain family 0	8	-0.444903	-0.800363	1.24527	298.204	2.54068	3.84e-09	-0.346073	0.556469	2.88675	1.03e-11
Smp_055200	4481.35	-0.135146	0.161803	-0.835248	0.403578	0.92143	Tumor suppressor candidate 3 (protein N33)	8	-0.48487	-0.683008	1.16788	1704.93	2.52082	1.11e-12	-0.144755	0.791691	2.66557	2.45e-14
Smp_158600	3506.38	-0.316158	0.133336	-2.37114	0.0177334	0.159304	dolichyl diphosphooligosaccharide protein	8	-0.604985	-0.45794	1.06293	1603.71	2.51589	3.95e-26	0.352131	0.231767	2.16376	8.26e-20
Smp_100120	605.645	-0.316357	0.150902	-2.09645	0.0360427	0.267581	er degradation enhancing alpha mannosidase	8	-0.654042	-0.390206	1.04425	232.565	2.50316	3.32e-11	0.488779	0.296139	2.01438	9.15e-08
Smp_169560	9136.58	-0.425015	0.158184	-2.68683	0.00721339	0.0784981	subfamily M23B non peptidase ue	8	-0.489944	-0.635984	1.12593	353.736	2.49293	4.15e-08	-0.0936242	0.90102	2.58655	7.7e-09
Smp_136640	3629.26	-0.342441	0.182804	-1.87327	0.0610312	0.380482	programmed cell death protein	8	-0.496774	-0.634973	1.13175	1005.35	2.48649	4.12e-20	-0.0600993	0.89617	2.54659	2.72e-21
Smp_010690	2515.34	-0.0275912	0.212136	-0.130063	0.896516	0.999981	actin related protein 2:3 complex, subunit 2	8	-0.495058	-0.747433	1.24249	83.7558	2.4734	7.31e-05	-0.198731	0.836619	2.67213	1.36e-05
Smp_084600	1876.17	-0.21378	0.112832	-1.89467	0.0581356	0.367764	solute carrier family 37	8	-0.443507	-0.761681	1.20519	574.161	2.46403	9.39e-24	-0.330199	0.292648	2.79423	2.34e-30
Smp_104270	16701.7	-0.00259494	0.12832	-0.0202225	0.983866	0.999981	ectonucleotide pyrophosphatase:phosphodiesterase	8	-0.569245	-0.370601	0.939846	71.6711	2.45479	1.64e-07	0.441131	0.472354	2.01365	1.58e-05
Smp_144840	797.185	-0.391858	0.133756	-2.92964	0.00339359	0.0427155	Thioredoxin domain containing protein 4	8	-0.558085	-0.500978	1.05906	898.958	2.43432	1.56e-20	0.198363	0.593451	2.23595	1.07e-17
Smp_098250	78.729	-0.512358	0.350632	-1.46124	0.143949	0.622501	hypothetical protein	8	-0.428348	-0.810579	1.23893	30.5638	2.43207	5.76e-06	-0.38969	0.613546	2.82176	1.51e-07
Smp_171530	740.005	-0.395787	0.147247	-2.68792	0.00718983	0.0783409	alpha parvin	8	-0.486079	-0.585446	1.07152	158.923	2.42193	9.6e-19	-0.0299849	0.951693	2.45192	2.18e-19
Smp_158430	135.623	-0.240369	0.186983	-1.28551	0.198613	0.732443	hepatotoxic ribonuclease omega 1	8	-0.676168	-0.18023	0.856398	211.501	2.40541	1.01e-13	0.832799	0.0192475	1.57261	1.31e-06
Smp_010280	1253.84	-0.124543	0.151041	-0.824569	0.409617	0.923331	monoacylglycerol lipase abhd12	8	-0.306345	-0.928772	1.23512	468.714	2.39913	1.25e-18	-0.745646	0.0148242	3.14477	3.59e-31
Smp_050890	1633.53	-0.250035	0.20761	-1.20435	0.228454	0.773665	hypothetical protein	8	-0.474085	-0.625559	1.09964	512.464	2.39895	6.82e-14	-0.0870552	0.869257	2.48601	4.24e-15
Smp_145360	217.222	-0.340031	0.213304	-1.59411	0.110911	0.551475	spermatogenesis associated protein 18	8	-0.383491	-0.813726	1.19722	105.003	2.39083	3.61e-08	-0.425687	0.458589	2.81651	4.98e-11
Smp_162770	10465.3	-0.240158	0.211404	-1.13602	0.255949	0.805709	lysosome associated membrane glycoprotein	8	-0.481162	-0.671502	1.15266	112.874	2.39041	3.54e-12	-0.172887	0.746923	2.5633	6.77e-14
Smp_066290	3199.08	-0.35471	0.197394	-1.79697	0.0723411	0.426847	#N/A	8	-0.696591	-0.227706	0.924297	138.829	2.38999	0.005327	0.727771	0.489786	1.66222	0.0580654
Smp_153340	2435.49	-0.278063	0.145427	-1.91205	0.0558695	0.360053	ectonucleotide pyrophosphatase:phosphodiesterase	8	-0.566669	-0.487147	1.05382	786.523	2.38893	9.69e-20	0.257193	0.46645	2.13174	3.86e-16
Smp_203170	856.497	0.0279028	0.26735	0.104368	0.916877	0.999981	hypothetical protein	8	-0.533839	-0.546925	1.08076	112.768	2.38387	5.74e-05	0.0788741	0.936314	2.30499	8.71e-05
Smp_094500	4922.45	0.188879	0.187136	1.00931	0.312825	0.859769	choline dehydrogenase, mitochondrial	8	-0.399531	-0.82158	1.22111	65.2392	2.38288	2.36e-09	-0.459164	0.38398	2.84204	1.02e-12
Smp_050430	478.654	-0.229733	0.163133	-1.40826	0.159053	0.65425	traB domain containing protein	8	-0.491754	-0.586696	1.07845	360.189	2.36386	3.18e-12	-0.0189771	0.978047	2.38283	1.24e-12
Smp_044000	17674.4	-0.0279573	0.150532	-0.185723	0.852662	0.999981	Bax inhibitor 1	8	-0.331035	-0.83287	1.16391	4386.68	2.36305	7.31e-15	-0.56056	0.113029	2.92361	1.18e-22
Smp_068530	8132.53	-0.660745	0.225121	-2.93507	0.00333476	0.0420983	syntenin 1	8	-0.713527	-0.257764	0.971291	479.342	2.35394	6.73e-10	0.740763	0.0861241	1.61318	3.05e-05
Smp_148790	2767.52	-0.00882305	0.151628	-0.0581889	0.953598	0.999981	laminin subunit beta 1	8	-0.67564	-0.224705	0.900345	40.2476	2.35386	0.0010799	0.647956	0.470542	1.70591	0.0191502
Smp_020770	1711.47	-0.0120021	0.223446	-0.053714	0.957163	0.999981	dolichyl diphosphooligosaccharide protein	8	-0.386088	-0.722414	1.1085	1089.22	2.34884	2.76e-09	-0.318383	0.552492	2.66723	6.07e-12
Smp_031730	1172.46	-0.0866653	0.153483	-0.564656	0.572308	0.989913	signal peptidase 18 kDa subunit	8	-0.552472	-0.455738	1.00821	771.278	2.3487	7.32e-09	0.267987	0.637622	2.08072	2.79e-07
Smp_105360	152.132	-0.959981	0.187391	-5.12287	3.01e-07	1.39e-05	neurogenic locus notch protein	6	-5.34779	3.42714	1.92065	50.9706	5.92802	1.77e-10	7.93619	8.53e-19	-2.00816	0.000592959
Smp_135060	1027.96	-0.186253	0.152467	-1.2216	0.221861	0.764157	bollus pemphigoid antigen	6	-3.61953	2.58133	1.0382	41.0157	4.92749	6.71e-08	7.16534	1.27e-16	-2.23785	0.000601905
Smp_021590	274.336	0.54687	0.249995	2.18752	0.0287046	0.227013	Rac GTPase activating protein 1	6	-3.55132	3.62244	-0.0711245	342.767	4.34273	3.93e-09	9.47977	2.17e-43	-5.13704	1.29e-22
Smp_051920	464.675	0.238641	0.182596	1.30694	0.191234	0.719493	nanos 1	6	-3.66746	4.08757	-0.420118	1054.47	4.30375	7.52e-09	10.195	3.04e-48	-5.89125	2.66e-22
Smp_154080	166.163	0.603527	0.37149	1.62461	0.104245	0.529353	hypothetical protein	6	-5.24143	4.54665	0.694782	126.302	4.0271	2.64e-05	9.23259	5.77e-27	-5.20549	3.46e-19
Smp_065150	285.735	0.723253	0.316832	2.28277	0.0224442	0.188984	N acetyltransferase ESCO2	6	-2.93506	3.23241	-0.297348	246.813	3.64287	4.19e-09	8.49895	1.34e-51	-4.85608	2.9e-33
Smp_157300	874.474	0.0210445	0.130956	0.160699	0.872331	0.999981	basic fibroblast growth factor receptor 1 A	6	-2.6165	2.75188	-0.135379	882.924	3.47517	4.51e-15	7.65332	1.69e-73	-4.17815	2.76e-26
Smp_013970	59.07	0.60216	0.267074	2.25466	0.0241547	0.198526	#N/A	6	-4.66351	3.7703	0.89321	31.004	3.43689	0.00217911	7.44789	3.28e-14	-4.01099	4.91e-07
Smp_086860	160.823	0.762141	0.402892	1.89167	0.0585344	0.369471	histone H2A	6	-2.84098	3.16503	-0.324056	439.524	3.41538	3.81e-08	8.25992	1.15e-47	-4.84455	5.37e-23
Smp_145470	155.979	0.414715	0.234578	1.76792	0.0770744	0.442724	zinc finger protein	6	-5.30713	4.91444	0.392689	175.847	3.41525	0.00121052	9.45265	1.56e-24	-6.03739	3.52e-15
Smp_047400	681.845	0.130308	0.190716	0.68326	0.494442	0.963446	hypothetical protein	6	-2.13246	1.97799	0.154474	136.829	3.38503	6.37e-11	5.85363	3.46e-33	-2.46859	2.87e-08
Smp_162340	89.3969	0.73812	0.248656	2.96844	0.00299315	0.0384636	serine:threonine protein kinase ATR	6	-4.47105	3.75311	0.717943	29.4255	3.17197	0.00356792	7.37045	7.93e-16	-4.19849	3.29e-10
Smp_194820	66.3697	0.546362	0.273585	1.99704	0.0458203	0.314129	dna repair and recombination protein rad54	6	-3.64161	4.01179	-0.370175	144.6	3.07797	0.00124301	9.12382	1.45e-29	-6.04585	1.43e-22
Smp_176000	134.471	0.634394	0.243212	2.60839	0.0090968	0.0949092	abnormal spindle microcephaly associated	6	-2.86067	3.05208	-0.19141	71.7624	3.04961	0.00132624	7.53247	1.64e-19	-4.48287	7.25e-10
Smp_158950	31.0022	0.754451	0.346542	2.17709	0.0294741	0.231194	serine:threonine protein kinase haspin	6	-3.01049	3.26834	-0.257851	106.992	3.04906	0.00109442	7.92233	4.82e-22	-4.87328	1.38e-11
Smp_127670	18.6088	0.746054	0.464945	1.60461	0.108581	0.544258	hypothetical protein	6	-3.28932	3.38131	-0.0919893	63.9796	2.99954	0.00297557	7.81842	6.26e-20	-4.81888	1.64e-12
Smp_128160	36.0992	0.405278	0.320353	1.2651	0.205836	0.74497	CST complex subunit STN1	6	-3.13547	3.24066	-0.105195	40.8335	2.95087	0.00317084	7.6314	4.04e-20	-4.68053	2.71e-14
Smp_135360	140.674	0.248296	0.316085	0.785535	0.43214	0.941245	serine:threonine protein kinase 12 B	6	-2.67179	2.8549	-0.183112	97.6438	2.86419	0.0010241	7.1556	1.3e-20	-4.29141	6.52e-10
Smp_009600	229.144	1.00449	0.287343	3.49578	0.000472683	0.00841337	serine:threonine protein kinase PLK1	6	-2.8935	3.59648	-0.702977	372.247	2.7924	3.32e-05	8.92332	6.66e-53	-6.13093	4.5e-37
Smp_179710	100.821	1.12433	0.407555	2.75872	0.00580285	0.0659883	Maternal Effect Lethal family member (mel 32)	6	-2.1502	2.48937	-0.339169	173.857	2.71277	3.54e-05	6.46435	1.56e-27	-3.75157	2.31e-11
Smp_132950	74.9436	0.559672	0.293312	1.90811	0.056377	0.361966	hypothetical protein	6	-2.95543	3.66904	-0.713611	158.747	2.62184	0.00133676	8.78391	3.26e-40	-6.16207	9.29e-36
Smp_175590	863.039	0.167278	0.139554	1.19866	0.230662	0.777647	proto oncogene tyrosine protein kinase receptor	6	-2.47714	2.66368	-0.186537	433.632	2.56879	0.0120237	6.31688	7.84e-12	-3.74809	8.05e-05
Smp_176010	76.3366	0.525027	0.247929	2.11765	0.0342045	0.25637	cytoskeleton associated protein 5	6	-2.53485	2.76335	-0.228498	45.3638	2.53876	0.0175958	6.4703	1.74e-12	-3.93154	6.34e-06
Smp_119910	141.145	0.41719	0.215979	1.93162	0.0534064	0.348887	#N/A	6	-2.53723	3.10708	-0.569848	94.2491	2.50462	0.00135164	7.67415	8.56e-33	-5.16953	3.09e-23
Smp_129710	454.822	0.426261	0.136377	3.1256	0.00177441	0.0251311	Uveal autoantigen with coiled coil domains	6	-2.85857	3.41078	-0.55221	104.135	2.47819	0.0164687	7.85212	1.6e-19	-5.37393	1.89e-11
Smp_132510	72.0842	0.846141	0.249083	3.39702	0.000681243	0.0113501	breast cancer type 1 susceptibility protein	6	-2.18499	2.3513	-0.166315	35.6089	2.40294	0.010681	5.90757	1.6e-13	-3.50463	2.57e-06
Smp_144160	116.291	0.824259	0.245967	3.3511	0.000804913	0.0131058	hypothetical protein	6	-2.83091	2.95001	-0.119094	23.5335	2.33763	0.0538488	6.37772	1.54e-10	-4.04009	1.5e-05
Smp_129410	60.6153	0.492813	0.400364	1.23091	0.218356	0.759045	hypothetical protein	6	-2.6412	3.41788	-0.77668	209.114	2.3162	0.00279661	8.24884	6.83e-38	-5.93264	8.72e-26
Smp_176260	208.593	0.605413	0.323797	1.86973	0.0615215	0.382865	hypothetical protein	6	-2.64246	3.51756	-0.875101	355.335	2.30819	0.0016772	8.41425	1.96e-42	-6.10605	3.37e-28
Smp_157190	18.7189	-0.055007	0.437472	-0.125738	0.899939	0.999981	hypothetical protein	6	-4.40189	4.42572	-0.0238274	42.8622	2.28823	0.0632792	8.24817	6.31e-19	-5.95994	1.34e-14
Smp_068710	228.709	0.0385676	0.22713	0.169804	0.865164	0.999981	hypothetical protein	6	-1.51367	1.44588	0.0677916	47.948	2.22988	0.000153962	4.20191	1.5e-15	-1.97202	0.000120055
Smp_054610	122.919	0.636129	0.230544	2.75926	0.00579332	0.0659671	WD repeat and HMG box DNA binding protein 1	6	-2.51325	3.17774	-0.664481	172	2.19075	0.0118042	7.56922	4.14e-25	-5.37847	5.93e-15
Smp_158360	34.5428	1.26213	0.500751	2.52047	0.0117197	0.116613	hypothetical protein	6	-2.13221	2.33277	-0.200552	19.3538	2.17712	0.0412466	5.68774	5.17e-11	-3.51061	1.22e-05
Smp_149260	158.3	0.381013	0.243907	1.56212	0.118259	0.571485	kinesin family 1	6	-2.62218	3.51337	-0.891191	123.919	2.10542	0.0151143	8.25298	5.06e-35	-6.14756	2.16e-27
Smp_016870	104.768	0.613578	0.261326	2.34794	0.0188776	0.166111	protein regulator of cytokinesis 1	6	-2.69673	3.78025	-1.08352	261.077	2.04931	0.0106128	8.80169	3.28e-44	-6.75238	9.56e-34
Smp_067260	91.9994	0.78305	0.248632	3.14943	0.00163589	0.0235968	dna polymerase alpha subunit b	6	-2.2218	3.00888	-0.787077	168.193	2.03143	0.00794171	7.21497	1.62e-29	-5.18354	1.02e-17
Smp_199870	47.8658	1.33026	0.332945	3.99545	6.46e-05	0.0015729	hypothetical protein	6	-2.01032	2.63449	-0.624169	71.8516	1.88538	0.0130281	6.43279	1.67e-27	-4.54741	1.17e-17
Smp_179320	868.651	0.687287	0.198705	3.45882	0.000542542	0.00948016	Argonaute	6	-2.20339	3.30269	-1.0993	1478.57	1.80659	0.00245177	7.71884	4.36e-49	-5.91225	4.13e-30
Smp_073300	1039.05	0.194313	0.17421	1.11539	0.264682	0.8137	Chaperone protein DnaJ 1	6	-2.10924	2.96315	-0.853915	679.353	1.7919	8.37e-05	7.27963	1.46e-75	-5.48772	7.42e-47
Smp_082490	378.421	1.1623	0.370865	3.13403	0.00172426	0.0246237	G2:mitotic specific cyclin B2	6	-2.29324	3.36917	-1.07593	829.963	1.78976	0.0020638	7.96821	7.62e-58	-6.17845	2.01e-37
Smp_200560	128.252	-0.232689	0.336767	-0.690952	0.489596	0.960354	hypothetical protein	6	-1.31222	1.51515	-0.202922	41.3084	1.5756	0.0300199	3.96963	2.93e-11	-2.39403	6.07e-05
Smp_135890	74.2998	-0.229835	0.247838	-0.92736	0.35374	0.893958	hypothetical protein	6	-1.88257	2.58069	-0.698123	109.901	1.5336	0.0445965	6.15303	1.5e-23	-4.61943	2.29e-14
Smp_164040	76.7711	0.391699	0.313222	1.25055	0.2111	0.750858	hypothetical protein	6	-2.07482	3.01826	-0.943446	195.372	1.45298	0.094262	6.93537	8.24e-24	-5.48239	9.39e-16
Smp_077180	125.624	0.186786	0.264163	0.707087	0.479513	0.957	serine:threonine protein kinase Chk1	6	-1.74691	2.40946	-0.66255	72.3547	1.44973	0.10753	5.64425	2.34e-15	-4.19452	3.3e-09
Smp_026030	71.149	0.553563	0.27775	1.99303	0.0462585	0.315955	DNA repair and recombination protein RAD54B	6	-2.26472	3.20392	-0.939198	31.1585	1.42489	0.24681	6.96691	7.25e-17	-5.54202	4.16e-12
Smp_002600	11679.7	-0.184733	0.148509	-1.24392	0.213529	0.751787	Lysosomal Pro X carboxypeptidase	6	-1.29663	1.72288	-0.426244	393.186	1.37033	2.66e-05	4.45282	7.37e-53	-3.08249	3.16e-26
Smp_141700	184.467	-0.0326792	0.193492	-0.168892	0.865881	0.999981	#N/A	6	-1.18783	1.5069	-0.319064	36.1624	1.357	0.0650154	3.86203	1.67e-10	-2.50504	4.83e-05
Smp_142820	166.455	-0.0345561	0.200016	-0.172767	0.862835	0.999981	hypothetical protein	6	-1.60268	2.34245	-0.739773	102.996	1.34754	0.131389	5.45206	3.56e-14	-4.10452	1.48e-08
Smp_047610	74.925	0.597376	0.303341	1.96932	0.0489158	0.328538	cell division control protein 45	6	-1.61053	2.65768	-1.04715	150.124	1.26475	0.1333	5.87719	2.03e-18	-4.61244	7.79e-12
Smp_169970	219.041	0.685462	0.237308	2.88849	0.00387093	0.0476086	kinetochore protein ndc80	6	-1.8829	2.75042	-0.867525	100.563	1.18933	0.231726	6.10311	9.61e-16	-4.91378	1.33e-10
Smp_018290	998.53	0.00567244	0.179687	0.0315684	0.974816	0.999981	serine:threonine protein kinase 17A	6	-1.17179	1.60884	-0.437047	245.193	1.13521	0.00306686	4.07258	2.78e-35	-2.93737	7.99e-19
Smp_137090	63.6647	0.610654	0.345041	1.7698	0.0767607	0.442004	BRCA1 associated RING domain protein 1	6	-1.31349	2.09469	-0.781198	89.947	1.1182	0.282816	4.61127	2.55e-08	-3.49307	3.72e-05
Smp_128210	103.322	0.490699	0.228232	2.15	0.031555	0.241902	claspin protein	6	-1.55455	2.07125	-0.516705	34.3919	1.06374	0.473707	4.23143	0.000210921	-3.16769	0.00731781
Smp_139620	549.349	0.139005	0.130635	1.06407	0.287295	0.836395	hypothetical protein	6	-1.31395	1.80372	-0.48977	439.801	0.999151	0.217045	4.3217	5.47e-11	-3.32254	7.3e-07
Smp_054010	60.6947	0.739953	0.459709	1.60961	0.107482	0.54005	y+l amino acid transporter 2	6	-1.45878	2.32155	-0.862772	125.992	0.911042	0.162465	5.43034	3.27e-32	-4.5193	9.66e-22
Smp_138610	569.251	-0.0876894	0.180537	-0.485713	0.62717	0.997803	tumor protein p53 binding protein 1	6	-0.845735	1.2871	-0.441366	84.3569	0.90268	0.158615	3.08404	3.24e-09	-2.18136	5.12e-05
Smp_178260	171.561	0.406958	0.226245	1.79875	0.0720578	0.425922	DNA polymerase alpha catalytic subunit	6	-1.32628	1.99279	-0.666505	87.0994	0.89889	0.25823	4.69783	3.37e-15	-3.79895	4.52e-10
Smp_155390	122.738	0.298041	0.204854	1.4549	0.145697	0.626593	hypothetical protein	6	-1.80373	2.90098	-1.09725	94.3916	0.843116	0.483035	6.20305	1.34e-13	-5.35994	3.47e-10
Smp_154090	236.073	1.13883	0.415621	2.74007	0.00614259	0.0688499	protein of unknown function DUF729	6	-1.58999	2.57746	-0.987465	153.287	0.819417	0.293463	5.82746	5.76e-25	-5.00805	3.84e-18
Smp_032500	623.026	0.547292	0.199153	2.7481	0.00599413	0.0676266	DNA replication licensing factor MCM7	6	-1.45409	2.41321	-0.959115	594.208	0.757546	0.113658	5.54923	1.45e-49	-4.79169	2.21e-36
Smp_143460	251.042	0.841266	0.249535	3.37133	0.000748055	0.0123436	disks large associated protein 5	6	-1.67179	2.82453	-1.15274	173.527	0.743709	0.443725	6.21524	6.32e-20	-5.47153	3.08e-15
Smp_146420	864.615	0.0321145	0.193464	0.165998	0.868159	0.999981	Spindle assembly checkpoint component MAD1	6	-0.964118	1.39523	-0.431112	78.2414	0.735729	0.331652	3.34947	7.65e-09	-2.61374	1.26e-05
Smp_123360	546.537	-0.210182	0.304769	-0.689642	0.49042	0.961052	serine rich repeat protein 2	6	-1.26094	1.9848	-0.723868	23.3819	0.720493	0.599844	4.1804	1.41e-05	-3.4599	0.000530175
Smp_019620	991.225	0.0590537	0.119924	0.492424	0.62242	0.996858	hypothetical protein	6	-0.790966	1.29999	-0.509025	228.517	0.674724	0.105392	3.15003	7.06e-21	-2.4753	5.68e-13
Smp_048080	485.934	-0.00108925	0.141506	-0.00769757	0.993858	0.999981	large subunit gtpase 1	6	-0.854021	1.47208	-0.618058	47.3843	0.617943	0.44813	3.37391	8.21e-09	-2.75597	5.93e-06
Smp_123670	4011.36	-0.165829	0.146201	-1.13425	0.256689	0.806858	lysosomal acid phosphatase	6	-0.812579	1.22684	-0.414263	954.394	0.581758	0.151991	3.03385	7.37e-20	-2.45209	2.86e-13
Smp_047620	282.57	1.15809	0.238492	4.85589	1.2e-06	4.88e-05	G2:mitotic specific cyclin B3	6	-1.28155	2.18745	-0.905893	133.855	0.569446	0.409659	4.96619	6.57e-26	-4.39674	2.96e-19
Smp_151560	62.459	0.407697	0.281661	1.44748	0.147764	0.630214	dna replication licensing factor mcm9	6	-1.61112	2.74401	-1.13289	73.8086	0.538841	0.703453	5.56917	3.49e-09	-5.03033	1.98e-07
Smp_141160	189.417	0.783342	0.325167	2.40905	0.0159943	0.14957	E3 ubiquitin protein ligase RNF168	6	-1.70543	3.12678	-1.42136	150.561	0.532572	0.502978	6.89864	5.43e-58	-6.36607	2.56e-40
Smp_172610	137.459	0.541051	0.20556	2.63208	0.00848642	0.0897389	hypothetical protein	6	-1.50733	2.66997	-1.16264	34.8289	0.512078	0.725569	5.41492	4.3e-09	-4.90284	3.4e-07
Smp_172530	475.485	0.60863	0.23711	2.56686	0.0102623	0.104408	DNA replication licensing factor MCM4	6	-1.74126	3.02919	-1.28793	480.063	0.487183	0.551965	6.63442	2.15e-33	-6.14724	1.18e-27
Smp_098850	124.992	0.0970732	0.20701	0.46893	0.639119	0.999328	interferon stimulated 20 kDa exonuclease	6	-0.916662	1.51498	-0.598314	149.313	0.480576	0.469133	3.55382	7.12e-14	-3.07325	2.66e-10
Smp_079560	170.507	0.444907	0.211902	2.09959	0.0357652	0.266211	DNA replication licensing factor MCM2	6	-1.59573	2.9944	-1.39867	279.64	0.442471	0.649657	6.26634	3.38e-23	-5.82387	3.87e-19
Smp_080730	295.662	0.641312	0.288855	2.22019	0.0264059	0.212557	cyclin dependent kinase 1	6	-1.44852	2.68156	-1.23304	697.17	0.437092	0.545028	5.79346	3.15e-31	-5.35636	3.85e-26
Smp_042810	117.735	0.62761	0.197556	3.17688	0.0014887	0.0218402	chromosome transmission fidelity protein 18	6	-0.99205	1.83723	-0.84518	84.9361	0.433	0.619875	3.99792	1.48e-11	-3.56492	5.22e-09
Smp_150830	66.9909	1.67386	0.381509	4.38746	1.15e-05	0.000341151	EF hand calcium binding domain containing protein	6	-1.12671	1.97772	-0.85101	24.8984	0.427505	0.744387	4.08648	3.42e-07	-3.65897	1.86e-05
Smp_072560	375.83	0.675778	0.189795	3.56057	0.000370056	0.00682805	hypothetical protein	6	-1.68733	3.18054	-1.49321	260.969	0.427478	0.600206	6.90772	6.07e-45	-6.48024	3.61e-35
Smp_024860	485.059	0.692533	0.159014	4.35518	1.33e-05	0.000387474	Basic helix loop helix transcription factor	6	-1.09232	1.85975	-0.767428	168.385	0.420319	0.632459	4.17756	6.3e-12	-3.75724	1.36e-09
Smp_071890	49.8484	0.553674	0.331815	1.66863	0.0951917	0.505162	hypothetical protein	6	-1.50377	2.5983	-1.09453	41.0098	0.419606	0.826084	4.26321	0.00104788	-3.84361	0.00366015
Smp_138470	584.386	0.235521	0.274016	0.859518	0.390055	0.916453	hypothetical protein	6	-1.01702	1.86925	-0.852236	962.483	0.37853	0.248506	4.27443	1.58e-67	-3.8959	4.16e-54
Smp_161380	1195.37	0.120769	0.12195	0.990318	0.322019	0.865767	DNA polymerase gamma	6	-0.57844	1.04244	-0.464005	129.552	0.353909	0.467255	2.42498	2.26e-12	-2.07107	7.48e-09
Smp_141430	24.7653	0.459989	0.424116	1.08458	0.278107	0.826152	hypothetical protein	6	-1.73894	3.40511	-1.66618	81.4846	0.347798	0.78945	7.03401	8.39e-26	-6.68621	3.07e-19
Smp_149490	48.4822	0.48304	0.309882	1.55878	0.119047	0.57176	hypothetical protein	6	-1.50733	3.07543	-1.5681	13.4066	0.307921	0.864472	5.62154	6.31e-09	-5.31362	3.66e-07
Smp_056350	50.2716	0.551999	0.351183	1.57183	0.11599	0.564648	mitotic spindle assembly checkpoint protein	6	-1.36681	2.69907	-1.33227	177.65	0.263065	0.711412	5.8604	7.37e-53	-5.59733	3.56e-39
Smp_157400	197.735	0.293849	0.239727	1.22577	0.220286	0.761786	family M13 unassigned peptidase (M13 family)	6	-1.16847	2.15654	-0.988075	65.4712	0.260178	0.771174	4.7257	9.55e-21	-4.46552	3.27e-16
Smp_151410	60.7994	0.0968667	0.258369	0.374916	0.707723	0.999981	protein phosphatase 7	6	-0.82676	1.43985	-0.613092	28.1466	0.25758	0.844599	3.09445	0.000255397	-2.83687	0.00123123
Smp_075720	27.0464	0.43935	0.443277	0.991141	0.321617	0.865767	Sm23	6	-0.981514	2.10384	-1.12233	50.5458	0.199268	0.872574	4.18957	8.77e-09	-3.99031	1.88e-07
Smp_049240	63.9599	0.0131085	0.366145	0.0358015	0.971441	0.999981	major egg antigen	6	-0.535393	1.0744	-0.539003	45.6337	0.179963	0.860062	2.32816	0.000262453	-2.14819	0.00145291
Smp_076600	106.207	0.6475	0.232074	2.79005	0.00526992	0.0614729	transcription factor SOX 14	6	-1.11706	2.10564	-0.988582	90.2988	0.160537	0.867797	4.55718	9.77e-17	-4.39664	3.16e-14
Smp_027920	1343.83	1.15476	0.387807	2.97768	0.00290438	0.0374347	Tubulin alpha 1 chain	6	-0.897581	1.99638	-1.0988	514.349	0.108073	0.893778	4.15538	2.02e-17	-4.04731	3e-16
Smp_128200	399.906	0.598506	0.225874	2.64973	0.00805555	0.085816	kinesin protein kif23	6	-1.60637	3.22221	-1.61584	326.527	0.0858159	0.933043	6.83812	6.49e-37	-6.7523	2.17e-31
Smp_171970	191.209	2.28555	0.345932	6.60694	3.92e-11	4.27e-09	ZIP1 protein	6	-0.736897	1.44219	-0.705292	26.6353	0.0102572	0.999041	2.94082	0.00198114	-2.93056	0.00282331
Smp_127020	94.6607	-0.0874685	0.292023	-0.299526	0.764539	0.999981	ets variant gene 4	6	-2.94254	5.88508	-2.94254	40.2356	0	1	8.07402	1.3e-14	-7.35364	4.81e-12
Smp_026400	57.3448	1.36551	0.550549	2.48028	0.0131281	0.127962	thyrotroph embryonic factor	6	-2.94979	5.89958	-2.94979	47.9692	0	1	8.3719	2.48e-20	-7.59064	2.3e-16
Smp_125760	78.0666	0.723439	0.256697	2.81826	0.00482853	0.0570204	denticleless protein	6	-1.36758	2.97826	-1.61067	66.2066	-0.00306148	1	6.01876	4.58e-19	-6.02182	2.27e-15
Smp_124280	20.1433	0.613122	0.514664	1.1913	0.233534	0.780242	hypothetical protein	6	-0.835848	2.05625	-1.2204	72.0375	-0.0312338	0.9869	3.84943	1.77e-06	-3.88067	2.88e-06
Smp_004060	275.703	0.830222	0.273374	3.03695	0.00238987	0.0320526	cell division cycle 20	6	-1.23155	2.6729	-1.44135	271.924	-0.0722436	0.951326	5.49361	2.21e-17	-5.56585	1.03e-16
Smp_137390	241.208	0.912077	0.283051	3.22231	0.00127162	0.0192129	histone RNA hairpin binding protein	6	-1.52435	3.07771	-1.55337	214.518	-0.0802847	0.948907	6.28238	4.5e-22	-6.36266	3.47e-20
Smp_137780	144.86	0.0241829	0.212118	0.114007	0.909232	0.999981	sister chromatid cohesion protein PDS5	6	-0.516571	1.14798	-0.631406	47.7056	-0.0931439	0.915942	2.4672	1.12e-06	-2.56034	2.36e-06
Smp_151320	74.7615	0.669243	0.323972	2.06575	0.0388525	0.281803	targeting protein for Xklp2	6	-0.821016	1.8291	-1.00808	73.2396	-0.0965353	0.918012	3.79029	2.78e-13	-3.88682	2.88e-12
Smp_166150	73.6946	0.644742	0.300678	2.1443	0.0320092	0.244173	maternal embryonic leucine zipper kinase	6	-1.41955	3.06693	-1.64738	169.894	-0.102968	0.930837	6.24882	9.3e-24	-6.35179	7.64e-21
Smp_167610	234.298	0.0440833	0.177734	0.24803	0.804111	0.999981	multidrug resistance associated protein 4	6	-0.470307	1.1639	-0.693595	38.5422	-0.10533	0.909204	2.41134	1.02e-05	-2.51667	1.36e-05
Smp_083710	364.623	0.249487	0.157848	1.58055	0.11398	0.559876	Fanconi anemia, complementation group M	6	-0.715653	1.58305	-0.867393	75.9078	-0.139424	0.875401	3.33285	1.06e-10	-3.47227	1.68e-10
Smp_028050	380.373	0.724506	0.184534	3.92614	8.63e-05	0.00197367	hypothetical protein	6	-1.22283	2.70059	-1.47776	56.0965	-0.15382	0.914279	5.25925	2.92e-11	-5.41307	2e-10
Smp_160680	303.779	0.275416	0.252734	1.08974	0.275826	0.822787	breast cancer type 2 susceptibility protein	6	-0.576547	1.25831	-0.681768	24.694	-0.156232	0.897433	2.55989	0.000582399	-2.71612	0.000501044
Smp_101890	131.672	0.126178	0.219943	0.573687	0.56618	0.987451	hypothetical protein	6	-0.457747	1.20888	-0.751138	98.1544	-0.16203	0.845215	2.43791	2.87e-06	-2.59994	1.33e-06
Smp_078920	306.748	-0.132668	0.164988	-0.804109	0.421334	0.932866	condensin complex subunit 3	6	-0.80719	1.65988	-0.852692	119.63	-0.162164	0.901971	3.31885	7.82e-05	-3.48101	4.06e-05
Smp_171710	1607.6	0.0949146	0.128436	0.739005	0.459904	0.951757	structural maintenance of chromosomes protein 2	6	-0.651593	1.36194	-0.710352	337.296	-0.171592	0.856562	2.85317	3.74e-06	-3.02476	1.02e-06
Smp_079050	346.752	0.474348	0.162035	2.92744	0.00341766	0.0429556	DNA primase large subunit	6	-0.86334	1.80896	-0.945615	58.2341	-0.191662	0.884562	3.48157	1.95e-05	-3.67323	1.21e-05
Smp_125890	404.377	0.0261685	0.154417	0.169467	0.865429	0.999981	dna photolyase	6	-0.564176	1.36531	-0.801132	197.64	-0.199664	0.780601	2.8195	8.9e-10	-3.01916	1.41e-10
Smp_136160	689.516	0.310361	0.128816	2.40935	0.0159812	0.14957	hypothetical protein	6	-0.520977	1.27744	-0.756462	227.388	-0.201014	0.689676	2.69782	4.6e-17	-2.89884	1.13e-17
Smp_124300	1151.91	0.25	0.146917	1.70164	0.0888225	0.484319	Lamin B receptor (ERG24)	6	-0.600965	1.3776	-0.776639	1011.66	-0.213068	0.681366	2.94965	8.34e-17	-3.16271	6.98e-19
Smp_009030	1555.76	0.260004	0.113352	2.29378	0.0218032	0.185037	ribonucleoside diphosphate reductase large	6	-0.474926	1.31181	-0.836883	1145.96	-0.272831	0.421485	2.7041	2.41e-27	-2.97693	3.22e-32
Smp_032490	375.604	0.0265432	0.191276	0.138769	0.889633	0.999981	tropomyosin	6	-0.574726	1.67487	-1.10015	200.723	-0.289552	0.741804	3.24205	4e-08	-3.5316	3.34e-09
Smp_007000	81.5075	-0.168946	0.240987	-0.701059	0.483266	0.958379	DNA replication complex GINS protein PSF1	6	-0.498793	1.35315	-0.854361	63.6311	-0.308551	0.668553	2.7167	2.75e-09	-3.02525	8.58e-10
Smp_170990	1262.27	0.0640561	0.138933	0.461057	0.644758	0.999981	vinculin	6	-0.52167	1.32532	-0.803651	447.533	-0.35051	0.559143	2.74287	2.16e-10	-3.09338	9.49e-13
Smp_140530	281.251	0.204231	0.202464	1.00873	0.313106	0.85999	replication factor c subunit 2	6	-0.449083	1.18062	-0.731534	222.979	-0.360265	0.618115	2.39868	3.53e-06	-2.75895	1.33e-07
Smp_074390	1175.83	0.318798	0.260146	1.22546	0.220402	0.761828	eukaryotic translation initiation factor	6	-0.484939	1.26106	-0.776124	231.174	-0.370157	0.600594	2.56276	3.77e-07	-2.93291	9.16e-09
Smp_143490	547.029	0.608757	0.192349	3.16485	0.00155162	0.0226089	DNA replication licensing factor MCM5	6	-1.14402	2.53761	-1.39358	577.361	-0.398629	0.625365	5.16895	1.3e-20	-5.56758	1.04e-22
Smp_171370	51.8769	0.585707	0.386756	1.51441	0.129922	0.591062	serine:threonine protein kinase Chk2	6	-0.916466	2.39761	-1.48114	188.617	-0.432169	0.64607	4.59981	2.97e-13	-5.03198	1.2e-14
Smp_140690	422.042	-0.144028	0.153129	-0.940564	0.346928	0.886233	DNA directed RNA polymerase I subunit RPA2	6	-0.350893	1.16146	-0.81057	94.2509	-0.434275	0.500032	2.30186	2.19e-07	-2.73613	5.96e-09
Smp_002810	568.295	0.218172	0.174157	1.25273	0.210303	0.749887	fidgetin protein 1	6	-0.386988	1.07947	-0.692484	149.123	-0.47321	0.551147	2.15807	0.000252548	-2.63128	9.28e-06
Smp_153520	243.588	0.694367	0.221715	3.1318	0.00173739	0.02477	protein ect2	6	-1.36665	3.17137	-1.80472	229.06	-0.483271	0.660875	6.18208	3.88e-19	-6.66535	2.68e-19
Smp_167810	305.734	0.384657	0.158176	2.43183	0.0150227	0.143023	family C50 non peptidase ue (C50 family)	6	-0.653966	1.71014	-1.05618	120.283	-0.500199	0.384523	3.47394	7.37e-20	-3.97414	4.52e-21
Smp_058990	1028.54	-0.268138	0.224921	-1.19214	0.233205	0.780242	meiotic nuclear division protein 1	6	-0.400263	1.29753	-0.897268	174.257	-0.525051	0.288164	2.54836	4.34e-12	-3.07341	1.37e-15
Smp_204600	53.255	0.631333	0.295133	2.13915	0.0324237	0.246243	invadolysin (M08 family)	6	-0.699916	1.96138	-1.26146	39.9137	-0.539356	0.557754	3.85042	5.71e-13	-4.38978	3.19e-12
Smp_050820	556.23	0.527333	0.223887	2.35535	0.0185051	0.164347	Replication factor C 38 kDa subunit	6	-0.486747	1.46047	-0.973728	363.907	-0.56884	0.304197	2.87509	1.73e-11	-3.44394	1.92e-15
Smp_080530	1166.46	-0.0948688	0.180411	-0.525849	0.598993	0.996125	replication protein A 32 kDa subunit	6	-0.258246	1.00862	-0.750371	440.298	-0.592285	0.14179	1.93	5.81e-09	-2.52229	4.18e-14
Smp_046500	1378.23	0.13329	0.270458	0.492831	0.622132	0.996858	proliferating cell nuclear antigen	6	-0.553869	1.67532	-1.12146	1614.93	-0.594892	0.188915	3.29294	1.79e-19	-3.88784	1.86e-26
Smp_111980	25.5372	0.294598	0.363362	0.810757	0.417505	0.928974	hypothetical protein	6	-0.255817	1.0513	-0.795479	64.321	-0.606223	0.260227	1.97386	1.11e-07	-2.58008	9.6e-10
Smp_076650	175.4	0.301036	0.232483	1.29488	0.195363	0.72865	ORAI calcium release activated calcium modulator	6	-0.287844	1.10646	-0.818616	63.6791	-0.616781	0.286853	2.09959	2.29e-07	-2.71638	1.83e-09
Smp_058320	7550.2	0.171704	0.17665	0.971999	0.331051	0.871909	nuclear autoantigenic sperm protein	6	-0.320327	1.18044	-0.860113	1808.51	-0.625198	5.95e-05	2.29048	3.07e-62	-2.91567	1.97e-94
Smp_052390	96.3166	0.912521	0.318523	2.86486	0.00417199	0.0508747	origin recognition complex subunit 5	6	-0.943749	2.46956	-1.52581	166.32	-0.641363	0.370429	4.95354	5.64e-28	-5.5949	6.54e-27
Smp_101670	460.598	0.0485422	0.153991	0.315229	0.752588	0.999981	5' AMP activated protein kinase subunit beta 2	6	-0.334961	1.14053	-0.805571	118.792	-0.642518	0.231416	2.22677	5.06e-08	-2.86929	2.42e-11
Smp_178740	361.23	0.182392	0.145707	1.25177	0.210653	0.750125	protein lin 54	6	-0.382444	1.32612	-0.943676	400.744	-0.661932	0.180136	2.53874	1.84e-10	-3.20067	1.84e-15
Smp_137660	232.138	0.46249	0.16278	2.8412	0.00449444	0.0539828	kinesin protein KIF20A	6	-0.330177	1.5431	-1.21293	52.3199	-0.69322	0.554353	2.55224	0.00397016	-3.24546	0.000268799
Smp_175490	222.809	0.0496689	0.209162	0.237467	0.812295	0.999981	sister chromatid cohesion protein PDS5	6	-0.352012	1.28804	-0.936029	48.3511	-0.699945	0.382516	2.42339	2.54e-05	-3.12334	4.55e-07
Smp_128870	93.2625	0.784812	0.254285	3.08635	0.00202631	0.0279617	nibrin	6	-1.14943	2.87951	-1.73008	147.931	-0.747394	0.461074	5.49125	1.18e-16	-6.23864	1.09e-17
Smp_172480	752.468	-0.0340762	0.215154	-0.158381	0.874157	0.999981	Krueppel factor 10 like	6	-0.273564	1.24537	-0.971811	401.609	-0.786447	0.00977014	2.28873	3.13e-19	-3.07518	6.99e-31
Smp_046280	395.776	0.676655	0.188362	3.59231	0.000327757	0.00620682	actin binding protein anillin	6	-1.12228	2.88514	-1.76287	183.556	-0.809812	0.354422	5.56314	2.26e-21	-6.37295	1.41e-22
Smp_168400	95.1394	0.0286623	0.346047	0.0828278	0.933989	0.999981	mis12	6	-0.40848	1.41431	-1.00583	153.788	-0.812954	0.0855749	2.678	1.95e-13	-3.49095	5.2e-19
Smp_040990	148.686	0.275038	0.306524	0.89728	0.369569	0.901823	Ribonuclease H2 subunit C	6	-0.379521	1.48479	-1.10527	52.8583	-0.835091	0.210289	2.76646	5.05e-10	-3.60155	5.98e-12
Smp_167880	1070.24	-0.0349783	0.121925	-0.286884	0.774201	0.999981	Acidic repeat containing protein	6	-0.311751	1.30632	-0.994571	387.573	-0.840851	0.00535659	2.42479	7.43e-22	-3.26564	7.39e-35
Smp_144810	1062.5	0.0422309	0.205916	0.205088	0.837503	0.999981	tyrosine protein phosphatase non receptor type	6	-0.220391	1.14591	-0.925517	65.7909	-0.846909	0.271966	1.96244	0.00160369	-2.80935	9.03e-06
Smp_166800	306.735	0.740021	0.269562	2.74527	0.00604613	0.0679458	hypothetical protein	6	-0.392338	1.51262	-1.12028	91.9642	-0.859025	0.110951	2.83483	9.45e-13	-3.69386	4.79e-17
Smp_069600	363.744	0.297185	0.159907	1.85848	0.0631008	0.389711	ATP dependent DNA helicase Q4	6	-0.391543	1.80995	-1.41841	176.896	-0.898005	0.228881	3.1482	1.12e-07	-4.04621	2.02e-11
Smp_127490	727.27	0.539439	0.142329	3.79009	0.000150595	0.00315773	blooms syndrome DNA helicase	6	-0.221658	1.35686	-1.1352	119.742	-0.908483	0.150673	2.36921	3.38e-06	-3.2777	4.38e-10
Smp_198820	307.469	0.23019	0.25687	0.896135	0.370181	0.901823	DNA replication complex GINS protein PSF3	6	-0.181375	1.18047	-0.999091	330.477	-0.927367	0.020609	2.0901	9.05e-10	-3.01747	7.04e-18
Smp_075110	89.6241	0.940761	0.23545	3.9956	6.45e-05	0.0015729	cell cycle checkpoint protein rad1	6	-0.766679	2.30187	-1.53519	113.685	-0.947873	0.205554	4.41556	8.34e-18	-5.36344	4.82e-20
Smp_146360	40.7852	0.0586947	0.37104	0.15819	0.874307	0.999981	twinkle protein mitochondrial	6	-0.120773	1.11624	-0.99547	66.601	-0.957003	0.090625	1.85132	3.66e-05	-2.80832	5.04e-09
Smp_160190	705.084	0.184147	0.131908	1.39603	0.162707	0.663877	primase, DNA, polypeptide 1 (49 kDa)	6	-0.274059	1.22719	-0.953127	254.123	-0.978355	0.0579888	2.23571	4.14e-07	-3.21407	5.15e-13
Smp_040350	492.604	0.513144	0.175823	2.91852	0.00351697	0.0440737	DNA binding protein RFX7	6	-0.338857	1.51291	-1.17406	171.273	-1.02383	0.00771017	2.77898	1.88e-21	-3.80281	2.11e-30
Smp_174910	1529.75	0.718443	0.207211	3.4672	0.000525901	0.00922688	importin subunit alpha 2	6	-0.567091	1.9702	-1.40311	1814.08	-1.03616	0.00928306	3.74933	2.41e-27	-4.78549	1.24e-42
Smp_201150	62.2711	0.22532	0.249077	0.904622	0.365665	0.898106	Equilibrative nucleoside transporter 1	6	-0.139079	1.38347	-1.24439	45.6602	-1.06433	0.171273	2.27552	0.000195277	-3.33985	2.48e-07
Smp_179650	9933.09	0.0651901	0.214449	0.303989	0.761136	0.999981	chromobox protein	6	-0.0751711	1.02762	-0.95245	1792.45	-1.06521	0.0101403	1.6961	9.93e-06	-2.76131	1.36e-13
Smp_087010	310.397	0.104802	0.175612	0.596781	0.550654	0.985603	DNA polymerase delta catalytic subunit	6	-0.317049	1.50236	-1.18531	256.296	-1.06702	0.00048503	2.74962	1.48e-30	-3.81665	5.56e-45
Smp_096360	931.961	0.280574	0.211321	1.32771	0.184274	0.707865	replication factor C subunit 4	6	-0.131679	1.02302	-0.891339	333.622	-1.074	0.0097048	1.78441	1.48e-06	-2.85841	1.51e-14
Smp_125040	723.131	0.406469	0.159947	2.54128	0.0110448	0.111055	Epa2p protein	6	-0.524126	1.83034	-1.30621	340.376	-1.07961	0.080948	3.37953	5.64e-11	-4.45914	1.47e-17
Smp_159630	493.506	0.536773	0.163022	3.29265	0.000992486	0.0155701	hypothetical protein	6	-0.279254	1.54881	-1.26956	75.8221	-1.08827	0.252028	2.53908	0.00116695	-3.62735	3.84e-06
Smp_147230	340.809	0.286398	0.173219	1.65339	0.0982518	0.513258	ATP dependent DNA helicase PIF1	6	-0.344193	1.46292	-1.11873	62	-1.10066	0.119235	2.56965	1.86e-06	-3.67031	4.58e-10
Smp_142040	157.794	0.577053	0.193312	2.98509	0.00283498	0.0367053	Myb DNA binding domain containing protein	6	-0.374707	1.69438	-1.31968	60.1448	-1.10522	0.321119	2.86064	0.00136524	-3.96586	1.11e-05
Smp_194530	221.155	0.612737	0.199796	3.06682	0.00216352	0.0295234	adenylate kinase isoenzyme 5	6	-0.395075	1.69822	-1.30314	88.2684	-1.10762	0.0981938	3.00159	9.03e-09	-4.10921	2.02e-13
Smp_177240	49.018	0.177232	0.322544	0.549482	0.582675	0.991299	twinkle protein, mitochondrial	6	-0.114698	1.17105	-1.05636	51.4676	-1.1104	0.02867	1.96466	2.63e-08	-3.07507	1.37e-12
Smp_161820	102.428	0.50587	0.322967	1.56632	0.117273	0.568959	hypothetical protein	6	-0.790242	2.67087	-1.88063	67.5096	-1.11142	0.203532	4.93685	1.38e-23	-6.04827	9.47e-20
Smp_094140	851.231	0.880851	0.222673	3.9558	7.63e-05	0.00179171	DNA replication licensing factor MCM6	6	-0.710384	2.30208	-1.5917	737.245	-1.14036	0.00604841	4.41849	2.38e-39	-5.55885	2.67e-53
Smp_173880	53.3444	0.590063	0.273234	2.15955	0.0308074	0.238605	RAD9 A	6	-0.317816	1.63071	-1.31289	69.0897	-1.18511	0.0597655	2.87351	8.88e-10	-4.05862	1.97e-14
Smp_147970	250.869	0.0740464	0.151396	0.489089	0.624778	0.997256	kinesin protein KIF14	6	-0.469619	1.8681	-1.39848	162.916	-1.18875	0.00631665	3.44436	7.4e-30	-4.63311	1.5e-35
Smp_162860	31.6125	0.143467	0.365465	0.392561	0.694644	0.999981	hypothetical protein	6	-0.287751	2.34102	-2.05327	33.1974	-1.19522	0.478558	2.89076	0.0376334	-4.08598	0.00232937
Smp_144750	332.125	0.0613397	0.149292	0.410869	0.681168	0.999981	hypothetical protein	6	-0.0703046	1.07322	-1.00291	108.577	-1.1985	0.126322	1.68332	0.0169399	-2.88182	2.42e-05
Smp_005330	1140.75	0.128983	0.158525	0.813644	0.415849	0.928974	methionine tRNA synthetase	6	-0.0842688	1.04024	-0.955968	203.527	-1.20296	0.00614922	1.7167	9.83e-06	-2.91966	1.52e-13
Smp_055890	2212.51	0.162192	0.188968	0.858302	0.390726	0.916605	ribonucleoside diphosphate reductase subunit M2	6	-0.292343	1.46638	-1.17403	1031.19	-1.20894	0.0116243	2.6116	1.22e-09	-3.82055	3.08e-19
Smp_148590	100.223	0.792962	0.387066	2.04865	0.0404965	0.288272	hypothetical protein	6	-0.700624	2.51807	-1.81745	103.638	-1.22372	0.106196	4.64376	2.06e-23	-5.86748	2.48e-22
Smp_151360	80.5805	1.02345	0.354258	2.88899	0.00386482	0.0476015	hypothetical protein	6	-0.739669	2.56461	-1.82494	81.8863	-1.24361	0.144111	4.67514	1.02e-17	-5.91875	1.93e-18
Smp_054840	598.454	0.334439	0.195644	1.70943	0.0873715	0.479344	DNA replication licensing factor MCM2	6	-0.222408	1.45179	-1.22938	588.203	-1.25731	0.00400796	2.51671	1.01e-10	-3.77402	7.05e-22
Smp_033700	409.091	0.244673	0.185003	1.32254	0.185989	0.711594	deoxyribodipyrimidine photo lyase	6	-0.52237	2.00209	-1.47972	228.879	-1.27154	0.0123199	3.7212	2.07e-21	-4.99274	5.24e-30
Smp_104980	927.018	0.00708915	0.137751	0.0514637	0.958956	0.999981	G2:M phase specific E3 ubiquitin protein ligase	6	-0.113453	1.18016	-1.0667	401.162	-1.28064	0.00732015	1.95015	6.17e-06	-3.23079	5.57e-14
Smp_148110	59.1461	0.0902137	0.264717	0.340793	0.733259	0.999981	transcription factor SOX 14	6	-0.272131	1.66974	-1.39761	16.1682	-1.28601	0.278254	2.53605	0.0051629	-3.82206	8.6e-05
Smp_210110	54.9159	0.570484	0.303385	1.88039	0.0600544	0.376415	mitotic checkpoint serine:threonine protein	6	-0.497287	2.8471	-2.34982	24.3529	-1.28835	0.331318	4.50121	1.12e-07	-5.78956	1.18e-08
Smp_141710	259.824	0.227559	0.170624	1.33369	0.182306	0.702502	kinetochore associated protein 1	6	-0.261592	1.80773	-1.54614	24.1204	-1.3205	0.277999	2.81178	0.00286816	-4.13228	3.41e-05
Smp_146160	609.456	0.83003	0.13041	6.36478	1.96e-10	1.86e-08	Fanconi anemia group D2 protein	6	-0.301165	1.60537	-1.3042	111.567	-1.35758	0.0549899	2.74352	3.2e-06	-4.10111	1.97e-11
Smp_018930	226.679	0.423873	0.275938	1.53611	0.124511	0.58251	hypothetical protein	6	-0.341963	1.74668	-1.40472	160.252	-1.40749	0.0565338	3.04754	7.42e-07	-4.45503	2.62e-12
Smp_118570	1197.37	0.200413	0.162183	1.23572	0.216561	0.754672	hypothetical protein	6	-0.188087	1.42721	-1.23913	307.416	-1.42305	0.000878063	2.39948	1.71e-10	-3.82252	9.04e-23
Smp_174820	38.4058	0.163752	0.317233	0.516189	0.605722	0.996858	hypothetical protein	6	-0.567503	2.50411	-1.9366	55.6741	-1.43065	0.114525	4.41309	3.23e-14	-5.84374	1.61e-15
Smp_141540	523.469	0.127048	0.142518	0.891452	0.372686	0.904059	Thymidine kinase 2, mitochondrial	6	-0.121686	1.40427	-1.28258	366.753	-1.44898	0.00114882	2.2958	7.17e-09	-3.74478	2.95e-20
Smp_127070	207.896	0.696626	0.184159	3.78274	0.000155109	0.00323659	origin recognition complex subunit	6	-0.285177	1.69896	-1.41379	113.043	-1.47357	0.045705	2.8779	3.12e-06	-4.35147	1.12e-11
Smp_156750	96.5844	0.180873	0.243454	0.742944	0.457515	0.95055	hypothetical protein	6	-0.365994	2.08061	-1.71462	51.2344	-1.48247	0.151781	3.37985	2.67e-05	-4.86232	1.7e-08
Smp_167940	828.614	0.959102	0.198237	4.83817	1.31e-06	5.26e-05	wee1 protein kinase 2	6	-0.230687	1.63326	-1.40257	202.43	-1.51629	0.00027217	2.80156	4.91e-17	-4.31785	2.01e-30
Smp_076710	122.994	0.184849	0.219676	0.841464	0.400088	0.92143	hypothetical protein	6	-0.0937299	1.39685	-1.30312	275.316	-1.52202	0.00175059	2.25145	1.52e-07	-3.77347	1.49e-17
Smp_164950	226.799	0.382319	0.280643	1.3623	0.173104	0.686306	hypothetical protein	6	-0.398782	1.90724	-1.50846	265.364	-1.52476	0.000439154	3.40188	1.31e-22	-4.92664	1.17e-36
Smp_135900	150.147	0.494877	0.191745	2.58092	0.00985378	0.101089	DNA double strand break repair rad50 ATPase	6	-0.411166	2.18238	-1.77122	86.8373	-1.56386	0.0635921	3.73669	9.03e-09	-5.30055	1.36e-13
Smp_173440	775.915	-0.0423101	0.140343	-0.301475	0.763052	0.999981	Fanconi anemia group J protein	6	0.028703	1.11327	-1.14198	183.673	-1.57148	1.9e-05	1.66394	1.97e-07	-3.23542	3.57e-21
Smp_153660	505.711	0.956979	0.206716	4.62944	3.67e-06	0.000127617	G1:S specific cyclin D2	6	-0.105196	1.43733	-1.33214	99.1912	-1.63782	0.0203537	2.26287	0.000194064	-3.90068	5.64e-10
Smp_105200	1175.28	0.0597816	0.115114	0.519326	0.603534	0.996125	glypican 4	6	0.061001	1.12332	-1.18432	205.342	-1.65776	1.34e-05	1.60296	2.41e-06	-3.26072	6.18e-20
Smp_133540	145.87	0.337048	0.247646	1.36101	0.173512	0.68707	asparagine synthetase domain containing protein	6	0.02208	1.24458	-1.26666	105.003	-1.67366	1.88e-06	1.88789	7.06e-16	-3.56156	2.12e-28
Smp_168220	114.106	0.598938	0.209953	2.85272	0.00433469	0.0524125	protein regulator of cytokinesis 1	6	-0.179075	1.72725	-1.54818	44.1147	-1.69511	0.00782469	2.84542	8.75e-13	-4.54053	2.29e-16
Smp_019760	305.108	0.340884	0.173259	1.96748	0.0491275	0.329361	helicase polq	6	-0.378983	2.14049	-1.76151	134.012	-1.70217	0.0044229	3.65384	2.68e-16	-5.356	2.7e-24
Smp_155500	49.5518	0.235222	0.295963	0.794768	0.426749	0.938301	DNA polymerase theta	6	0.565219	3.71386	-4.27908	20.2751	-1.70836	0.226486	4.0268	0.000101386	-5.73516	6.17e-07
Smp_154940	76.7213	0.898028	0.352837	2.54516	0.0109226	0.109955	hypothetical protein	6	-0.40812	2.58176	-2.17364	31.8898	-1.70895	0.106665	4.14843	1.78e-10	-5.85738	1.43e-11
Smp_129510	276.412	0.174929	0.236463	0.739771	0.459439	0.951071	metallophosphoesterase domain containing protein	6	0.0363363	1.46645	-1.50278	127.565	-1.74213	0.00411445	2.12984	6.9e-05	-3.87197	2.31e-12
Smp_193360	110.284	0.596793	0.231154	2.5818	0.00982876	0.100953	Fanconi anemia group I protein	6	0.404352	3.94858	-4.35294	26.5423	-1.74846	0.165335	4.85867	1.02e-10	-6.60712	3.99e-11
Smp_046910	174.43	0.572625	0.332422	1.72259	0.0849636	0.470639	DNA polymerase epsilon subunit 4	6	-0.092424	1.67273	-1.58031	80.7442	-1.80474	0.0126479	2.61772	6.2e-06	-4.42246	6.3e-12
Smp_106040	109.593	0.404421	0.289294	1.39796	0.162126	0.662453	Structure specific endonuclease SLX1	6	0.0491027	1.31541	-1.36451	64.1837	-1.81641	0.00569505	1.91623	0.000379589	-3.73264	3.48e-10
Smp_181870	28.4586	0.101442	0.369476	0.274558	0.783656	0.999981	dna replication licensing factor mcm8	6	0.556329	3.73164	-4.28797	18.9129	-1.82997	0.177669	4.20241	8.93e-06	-6.03238	5.1e-08
Smp_184420	19.4146	0.80942	0.442388	1.82966	0.0673007	0.407167	hypothetical protein	6	0.762868	3.39861	-4.16147	14.6703	-1.83841	0.18296	3.42824	0.000842156	-5.26666	4.54e-06
Smp_173420	497.893	0.523819	0.22299	2.34906	0.0188206	0.16578	leucine rich repeat protein 1	6	0.031295	1.46007	-1.49136	320.411	-1.85509	5.82e-05	2.14056	3.32e-07	-3.99565	1.56e-20
Smp_037590	1579.65	0.360735	0.103983	3.46916	0.000522081	0.00917859	dna replication licensing factor mcm3	6	-0.0924342	1.57598	-1.48355	928.66	-1.86054	3.62e-06	2.4887	4.11e-11	-4.34925	9.05e-31
Smp_130020	194.271	0.349904	0.169516	2.06413	0.0390052	0.28182	hypothetical protein	6	-0.019655	1.46768	-1.44803	87.0922	-1.87313	8.27e-05	2.2182	1.1e-09	-4.09134	7.83e-21
Smp_173820	352.314	0.100997	0.164807	0.612823	0.539994	0.98412	equilibrative nucleoside transporter	6	0.104368	1.27915	-1.38352	50.6873	-1.90969	0.00578925	1.77897	0.00234172	-3.68867	4.93e-09
Smp_124230	112.927	0.796934	0.263911	3.01971	0.0025302	0.033311	dna repair protein rad51 1	6	-0.327407	2.18643	-1.85903	163.027	-1.92183	0.000336445	3.72173	1.94e-23	-5.64355	6.2e-32
Smp_130740	62.9986	0.733163	0.370704	1.97776	0.0479562	0.324119	chromosome transmission fidelity protein 8	6	-0.0383743	1.82392	-1.78554	35.4998	-1.92944	0.0474136	2.66865	0.000364189	-4.59809	6.72e-08
Smp_180890	200.777	0.618892	0.190435	3.24988	0.00115453	0.0178516	Rho GTPase activating protein 19	6	0.0582006	1.37488	-1.43308	143.173	-1.944	0.000860914	1.9959	0.000149621	-3.93989	2.62e-13
Smp_167540	232.638	0.18376	0.159314	1.15345	0.248726	0.795769	dna replication factor cdt1	6	-0.159938	1.79697	-1.63703	204.032	-1.98859	7.6e-05	2.89387	6.29e-12	-4.88246	5.83e-26
Smp_180190	353.418	-0.0929069	0.173912	-0.534217	0.593191	0.994058	hypothetical protein	6	-0.0694461	1.68693	-1.61749	191.171	-2.00453	7.36e-05	2.58472	1.98e-09	-4.58925	1.05e-22
Smp_130670	202.698	-1.2533	0.183562	-6.82765	8.63e-12	9.89e-10	hypothetical protein	6	0.115625	1.24383	-1.35945	54.1852	-2.02812	0.0162033	1.61247	0.0413067	-3.64059	2.57e-06
Smp_150840	594.783	0.0781246	0.161867	0.482647	0.629346	0.997803	Cell growth regulating nucleolar protein	6	0.0812208	1.34399	-1.42521	155.762	-2.03293	4.54e-07	1.91877	6.39e-09	-3.95169	1.62e-25
Smp_154370	119.718	-0.0426387	0.195193	-0.218443	0.827084	0.999981	outer dense fiber protein 3	6	-0.112173	2.0155	-1.90333	54.6051	-2.05488	0.00848086	3.13711	1.98e-08	-5.19199	5.38e-14
Smp_013570	218.034	0.782222	0.24423	3.20281	0.00136096	0.0202776	hypothetical protein	6	0.0827858	1.59995	-1.68273	54.3424	-2.06465	0.00357209	2.25664	7.44e-05	-4.32129	1.87e-11
Smp_133990	78.1233	0.263325	0.26625	0.989014	0.322656	0.866416	DNA topoisomerase 2 binding protein 1	6	0.568741	4.11228	-4.68102	43.1907	-2.07873	0.101245	4.71124	1.4e-07	-6.78997	1.56e-10
Smp_199800	463.337	0.0105647	0.143495	0.0736238	0.94131	0.999981	coiled coil domain containing protein 111	6	0.0903783	1.37852	-1.4689	65.4293	-2.09092	0.000530787	1.94084	7.51e-05	-4.03177	4.32e-13
Smp_086220	254.938	0.174715	0.151007	1.157	0.247273	0.794694	hypothetical protein	6	-0.291776	2.18985	-1.89808	177.737	-2.11636	4.58e-05	3.64877	1.49e-21	-5.76513	4.32e-34
Smp_133660	62.6085	0.736265	0.248752	2.95984	0.00307798	0.0393186	protein lin 9	6	-0.258761	3.04214	-2.78338	86.6758	-2.15764	0.0607495	4.39096	1.4e-06	-6.5486	4.03e-11
Smp_173450	80.905	0.436487	0.301676	1.44687	0.147932	0.630214	chromosome associated kinesin KIF4A	6	0.416125	4.52288	-4.939	84.9356	-2.21727	0.0648192	5.39949	8.01e-11	-7.61676	5.68e-14
Smp_057600	199.391	0.523691	0.186584	2.80673	0.00500475	0.0587785	hypothetical protein	6	0.235968	1.21123	-1.4472	68.3331	-2.22481	0.000447356	1.4914	0.00838167	-3.71622	3.79e-10
Smp_151510	195.38	0.26579	0.171152	1.55295	0.120436	0.573304	crossover junction endonuclease mus81	6	0.160742	1.38554	-1.54628	77.7862	-2.25334	0.0195568	1.71111	0.0699288	-3.96445	8.06e-06
Smp_181410	206.727	0.42179	0.284984	1.48005	0.138861	0.611125	hypothetical protein	6	0.230064	1.19586	-1.42592	355.952	-2.25546	1.17e-05	1.49158	0.0028597	-3.74704	1.85e-14
Smp_041540	97.855	1.77735	1.02071	1.7413	0.0816316	0.459177	Hormone receptor 4 (dHR4)	6	0.0340296	2.73355	-2.76758	39.5311	-2.42361	0.0141113	3.89144	7.7e-13	-6.31505	1.79e-13
Smp_199150	34.1053	0.491026	0.329173	1.49169	0.135779	0.603877	rho guanine nucleotide exchange factor 3	6	0.233826	1.45083	-1.68466	43.3433	-2.43028	0.00767301	1.76459	0.0344212	-4.19487	6.35e-07
Smp_057590	996.151	0.776778	0.245511	3.16392	0.00155658	0.0226429	hypothetical protein	6	0.105541	1.56048	-1.66602	623.379	-2.46258	3.16e-13	2.20137	5.53e-13	-4.66394	7.83e-47
Smp_162710	203.786	0.443582	0.176137	2.51839	0.0117894	0.117172	serine:threonine protein kinase 6	6	0.128425	1.53747	-1.66589	260.086	-2.48441	4.2e-08	2.11862	1.29e-07	-4.60303	1.05e-26
Smp_066260	511.636	0.282563	0.197853	1.42815	0.153249	0.642986	replication factor C subunit 5	6	0.190439	1.43656	-1.627	272.549	-2.4913	3.69e-09	1.90806	2.98e-07	-4.39937	9.86e-28
Smp_062080	125.47	0.285306	0.248264	1.14921	0.25047	0.797054	serine protease inhibitors serpins	6	0.315896	1.24949	-1.56538	69.7793	-2.50692	9.57e-07	1.47726	0.000211947	-3.98418	2.03e-16
Smp_127750	116.642	0.24087	0.201404	1.19595	0.231714	0.779361	kelch domain containing protein 9	6	0.244682	1.45735	-1.70203	121.901	-2.55202	3.28e-07	1.87507	5.98e-06	-4.42709	8.72e-21
Smp_153630	58.5268	0.823891	0.313472	2.62827	0.00858194	0.0906375	hypothetical protein	6	0.357296	1.35151	-1.70881	68.8349	-2.69132	4.73e-06	1.54126	0.000858454	-4.23258	2.98e-14
Smp_199070	735.704	0.257685	0.122332	2.10643	0.0351666	0.262437	DNA mismatch repair protein MSH2	6	0.222959	1.53096	-1.75392	438.182	-2.74509	6.93e-15	1.96914	4.71e-10	-4.71422	1.25e-43
Smp_124120	177.175	0.443604	0.232691	1.90641	0.0565966	0.362226	dna polymerase epsilon subunit 2	6	0.167636	1.72842	-1.89606	181.336	-2.74576	1.44e-07	2.32278	1.4e-07	-5.06854	1.26e-24
Smp_200410	344.414	0.516667	0.304767	1.69529	0.090021	0.48858	thymidylate synthase	6	0.369792	1.42864	-1.79843	201.226	-2.84862	9.5e-10	1.61068	6.67e-05	-4.45929	1.9e-23
Smp_152670	122.928	0.2946	0.220196	1.3379	0.180929	0.700455	crossover junction endonuclease EME1	6	0.1499	1.91432	-2.06422	190.191	-2.94504	1.56e-06	2.54342	1.78e-06	-5.48846	2.93e-21
Smp_169410	57.8096	0.480619	0.257675	1.86521	0.0621519	0.384936	hypothetical protein	6	1.02809	3.76895	-4.79704	34.9874	-2.96407	0.00741705	3.9069	2.56e-08	-6.87097	3.03e-12
Smp_140240	345.741	0.750184	0.247439	3.03179	0.00243105	0.0325035	hypothetical protein	6	-0.0116699	2.26486	-2.25319	233.758	-2.96625	1.12e-09	3.36711	9.16e-24	-6.33336	2.12e-43
Smp_121460	606.764	0.170222	0.195553	0.870464	0.384047	0.914585	hypothetical protein	6	0.351153	1.59484	-1.94599	200.451	-3.07749	2.52e-15	1.92191	6.93e-11	-4.9994	1.41e-40
Smp_066050	168.592	0.24019	0.211382	1.13628	0.255838	0.805657	transcriptional enhancer factor TEF 1	6	0.484599	1.47516	-1.95976	94.9003	-3.25226	1.87e-06	1.48703	0.0177036	-4.7393	4.2e-13
Smp_164560	133.774	0.0259589	0.216254	0.120039	0.904452	0.999981	hypothetical protein	6	0.544627	1.86189	-2.40651	47.4392	-3.55549	3.87e-06	1.99289	0.000144389	-5.54838	3e-14
Smp_187190	395.619	0.230405	0.19584	1.1765	0.239396	0.787334	innexin unc 9	6	1.76274	2.82289	-4.58564	18.6108	-3.71189	0.000393017	1.60344	0.0234114	-5.31533	7.89e-08
Smp_040020	95.8912	0.531046	0.275312	1.92889	0.0537448	0.349952	histone H3	6	0.288829	2.57415	-2.86298	135.332	-3.77821	4.97e-08	3.39171	5.03e-18	-7.16993	5.62e-28
Smp_166820	235.289	0.398337	0.172437	2.31004	0.0208859	0.179024	hypothetical protein	6	0.354075	2.37304	-2.72712	125.157	-3.84666	2.51e-07	2.85659	1.45e-07	-6.70325	2.99e-21
Smp_169120	23.0305	-0.364263	0.393533	-0.925622	0.354642	0.893988	DNA mismatch repair protein MSH2	6	0.767071	1.95252	-2.71959	40.089	-3.98833	4.58e-07	1.78994	7.42e-06	-5.77827	1.95e-14
Smp_036020	181.291	-0.580241	0.185056	-3.13548	0.0017157	0.0245423	hypothetical protein	7	-0.21416	0.521878	-0.307718	20.1024	-0.119809	0.934389	1.09569	0.314648	-1.2155	0.250576
Smp_094570	646.114	0.0790605	0.123752	0.638865	0.522911	0.977298	WD repeat containing protein 75	7	-0.167547	0.754163	-0.586616	266.829	-0.127378	0.883491	1.37146	0.0213698	-1.49884	0.0112623
Smp_033210	140.481	0.040421	0.21044	0.192078	0.847681	0.999981	Cardiolipin synthase	7	-0.0713053	0.371627	-0.300322	131.758	-0.130113	0.849915	0.756122	0.133944	-0.886234	0.0738505
Smp_152740	245.307	-0.0271537	0.15412	-0.176186	0.860148	0.999981	Cirhin	7	-0.499778	1.06032	-0.560546	102.392	-0.148842	0.859578	2.28118	1.61e-05	-2.43002	8.31e-06
Smp_203290	54.7564	1.46987	0.343474	4.27942	1.87e-05	0.000519658	hypothetical protein	7	-0.313076	0.916495	-0.603419	119.397	-0.155466	0.850698	1.91117	0.000379662	-2.06663	0.000165441
Smp_098980	518.496	0.313491	0.147892	2.11974	0.0340282	0.255271	protein sda1	7	-0.194391	0.478538	-0.284147	275.208	-0.174157	0.854776	1.05861	0.136361	-1.23276	0.0723325
Smp_014050	1505.4	0.0216857	0.137431	0.157793	0.87462	0.999981	F box only protein 42	7	-0.115409	0.3562	-0.240792	303.976	-0.184117	0.78355	0.809149	0.114831	-0.993266	0.0448599
Smp_212220	2653.62	-0.0113038	0.111239	-0.101618	0.91906	0.999981	FACT complex subunit SPT16	7	-0.163342	0.555658	-0.392316	302.698	-0.184369	0.8129	1.115	0.0505245	-1.29937	0.0197171
Smp_212260	2740.53	-0.00538594	0.14886	-0.0361814	0.971138	0.999981	histone binding protein Caf1	7	-0.278522	0.85048	-0.571958	1657.38	-0.186672	0.603396	1.74415	1.29e-11	-1.93082	5.56e-14
Smp_178700	1015.54	-0.053297	0.147212	-0.362043	0.71732	0.999981	histone acetyltransferase type B catalytic	7	-0.145804	0.587771	-0.441967	414.047	-0.189261	0.665719	1.18582	0.000181646	-1.37508	1.49e-05
Smp_019820	1132.01	-0.0950115	0.186546	-0.50932	0.610528	0.996858	hypothetical protein	7	-0.0956566	0.459807	-0.36415	332.661	-0.196838	0.736818	0.920338	0.0364029	-1.11718	0.00975141
Smp_158070	555.06	0.196692	0.156398	1.25764	0.208521	0.749208	#N/A	7	-0.0684329	0.429436	-0.361003	41.436	-0.209576	0.787113	0.816672	0.150843	-1.02625	0.0736962
Smp_064590	5059.16	-0.0618371	0.14839	-0.41672	0.676883	0.999981	RNA binding protein 39	7	-0.0876763	0.447126	-0.35945	1487.34	-0.210211	0.76796	0.874359	0.114418	-1.08457	0.0404026
Smp_159400	376.469	-0.0238822	0.139963	-0.170632	0.864513	0.999981	phospholipid transport protein	7	-0.152799	0.55116	-0.398361	84.7136	-0.210257	0.757023	1.11789	0.0203393	-1.32814	0.00657731
Smp_148480	1445.3	-0.0412379	0.17576	-0.234626	0.814499	0.999981	Cleavage and polyadenylation specificity factor	7	-0.120434	0.442564	-0.32213	179.704	-0.21449	0.722411	0.942315	0.0379736	-1.15681	0.0098441
Smp_032810	2531.64	0.109047	0.24765	0.440326	0.659701	0.999981	thymidylate kinase	7	-0.0903175	0.425677	-0.335359	492.655	-0.214847	0.640964	0.878197	0.0129296	-1.09304	0.00169408
Smp_175950	492.028	0.102591	0.171166	0.599365	0.54893	0.985603	tRNA (cytosine(34) C(5)) methyltransferase	7	-0.337493	0.752683	-0.41519	168.403	-0.214998	0.827364	1.5657	0.0257973	-1.78069	0.0103111
Smp_063420	7297.8	0.145441	0.14952	0.972719	0.330693	0.871808	chaperonin containing TCP1, subunit 5 (epsilon)	7	-0.116587	0.478035	-0.361449	2167.85	-0.219952	0.618249	0.976407	0.00391655	-1.19636	0.000318292
Smp_036760	598.464	0.172003	0.187994	0.914938	0.360224	0.894009	hypothetical protein	7	-0.301962	0.872331	-0.57037	64.0216	-0.220571	0.779422	1.82278	0.000446986	-2.04335	0.000142701
Smp_022140	959.303	0.165489	0.174884	0.946275	0.344008	0.883716	serine:threonine protein kinase RIO1	7	-0.188998	0.645525	-0.456527	276.219	-0.222283	0.712606	1.27702	0.00362156	-1.49931	0.000607759
Smp_038930	1809.72	-0.0297691	0.125713	-0.236802	0.812811	0.999981	pre rRNA processing protein TSR1	7	-0.166165	0.550115	-0.38395	527.678	-0.226008	0.470825	1.15942	6.23e-07	-1.38543	3.78e-09
Smp_139230	298.769	0.135551	0.188202	0.720241	0.471377	0.955925	polypeptide N acetylgalactosaminyltransferase	7	-0.0945006	0.390456	-0.295956	171.475	-0.228688	0.68135	0.836825	0.0504756	-1.06551	0.0115257
Smp_147540	1084.5	0.285355	0.156269	1.82605	0.067843	0.409583	hypothetical protein	7	-0.162384	0.599595	-0.43721	165.309	-0.23035	0.688979	1.19947	0.00432658	-1.42982	0.000718483
Smp_156350	1837.69	-0.00656781	0.128929	-0.0509411	0.959372	0.999981	activating molecule in BECN1 regulated autophagy	7	-0.0939391	0.400317	-0.306378	396.59	-0.230594	0.657993	0.829898	0.0415509	-1.06049	0.00761446
Smp_179000	3192.46	0.196197	0.138852	1.413	0.157656	0.652773	PHD and RING finger domain containing protein 1	7	-0.0875587	0.429554	-0.341995	375.116	-0.232644	0.50802	0.88389	0.000900959	-1.11653	2.95e-05
Smp_018950	537.748	-0.192387	0.152585	-1.26085	0.207362	0.748088	lupus la ribonucleoprotein	7	-0.21543	0.662114	-0.446683	291.765	-0.232648	0.591252	1.35099	1.63e-05	-1.58364	5.93e-07
Smp_151030	614.167	-0.0035081	0.230992	-0.0151871	0.987883	0.999981	3 hydroxyacyl coenzyme A dehydrogenase type 2	7	-0.0450188	0.388755	-0.343736	529.94	-0.233753	0.576004	0.742993	0.0246478	-0.976746	0.00255667
Smp_092930	703.927	-0.0105605	0.123256	-0.0856795	0.931721	0.999981	hypothetical protein	7	-0.321812	0.822604	-0.500793	241.767	-0.234641	0.664403	1.75553	3.97e-06	-1.99017	2.47e-07
Smp_211160	360.084	-0.0246201	0.146247	-0.168346	0.866311	0.999981	ATP dependent RNA helicase DHX33	7	-0.135877	0.592481	-0.456603	51.3929	-0.23521	0.799184	1.133	0.0972163	-1.36821	0.0424197
Smp_162100	790.782	-0.0707988	0.19882	-0.356095	0.72177	0.999981	transcriptional adapter 3	7	-0.138425	0.471791	-0.333366	137.91	-0.237492	0.715053	0.974579	0.0478305	-1.21207	0.012613
Smp_070070	1147.52	0.137776	0.123086	1.11935	0.262991	0.813644	pre mrna 3' end processing factor fip1	7	-0.222961	0.678541	-0.45558	370.631	-0.239675	0.726754	1.4162	0.00452179	-1.65587	0.000844408
Smp_203210	123.869	-0.161599	0.208705	-0.774294	0.438757	0.944415	hypothetical protein	7	-0.0305153	0.363811	-0.333296	27.5051	-0.241543	0.753119	0.680683	0.248712	-0.922226	0.116675
Smp_007540	773.656	-0.00428232	0.221212	-0.0193585	0.984555	0.999981	exosome complex component CSL4	7	-0.0873063	0.443021	-0.355714	198.602	-0.241678	0.706609	0.907314	0.0663231	-1.14899	0.0175409
Smp_157780	773.356	0.0279761	0.203529	0.137455	0.890671	0.999981	chaperone protein DnaJ	7	-0.025341	0.402392	-0.377051	241.194	-0.242398	0.607177	0.747358	0.0434779	-0.989755	0.0065863
Smp_147850	1778.65	-0.0867864	0.126071	-0.68839	0.491207	0.961938	large subunit gtpase 1	7	-0.285087	0.806101	-0.521013	562.383	-0.242704	0.529922	1.65795	3.42e-09	-1.90066	1.65e-11
Smp_176530	1640.1	-0.125434	0.13118	-0.956197	0.338973	0.879345	hypothetical protein	7	-0.178005	0.543733	-0.365728	280.135	-0.243896	0.646181	1.14248	0.00413578	-1.38637	0.000467043
Smp_097210	1338.94	0.0402819	0.132756	0.303429	0.761563	0.999981	nucleoporin1	7	-0.0482786	0.343087	-0.294808	279.515	-0.244546	0.532533	0.66429	0.0330836	-0.908835	0.00308828
Smp_064600	1790.69	0.0722396	0.186163	0.388046	0.697982	0.999981	Sjoegren syndrome:scleroderma autoantigen 1	7	-0.0287285	0.373118	-0.344389	208.58	-0.247835	0.465629	0.711865	0.00645229	-0.9597	0.000294373
Smp_053510	1866	0.0221647	0.145816	0.152005	0.879183	0.999981	aspartyl tRNA synthetase, cytoplasmic	7	-0.124862	0.435056	-0.310194	363.498	-0.250936	0.580308	0.917317	0.00867764	-1.16825	0.000748382
Smp_045510	2441.37	0.0534841	0.264262	0.202391	0.839611	0.999981	small ubiquitin modifier	7	-0.0176027	0.349445	-0.331843	643.427	-0.253642	0.662977	0.657606	0.175802	-0.911248	0.0461428
Smp_160570	1655.55	0.104191	0.110789	0.940447	0.346988	0.886233	hypothetical protein	7	-0.164613	0.592413	-0.4278	132.883	-0.254017	0.597473	1.20353	0.000489616	-1.45754	4.02e-05
Smp_035270	13718.2	0.353908	0.185989	1.90285	0.0570607	0.36418	cytosolic malate dehydrogenase	7	-0.0557395	0.397181	-0.341441	1564.77	-0.254105	0.716081	0.754142	0.190085	-1.00825	0.0622104
Smp_204740	4166.55	0.0745496	0.107014	0.696636	0.486031	0.959037	Sin3 histone deacetylase corepressor complex	7	-0.0439244	0.342324	-0.2984	985.589	-0.25462	0.543732	0.68765	0.0447091	-0.94227	0.00425218
Smp_156590	8244.33	-0.198222	0.183591	-1.07969	0.280278	0.829583	Filamin C	7	-0.179849	0.582409	-0.40256	237.843	-0.255061	0.63391	1.18311	0.0032178	-1.43817	0.000324984
Smp_138680	2498.26	0.132555	0.135102	0.981145	0.326521	0.869526	DNAj subfamily C member	7	-0.0929629	0.450413	-0.357451	869.286	-0.257613	0.421103	0.91066	0.000331099	-1.16827	3.27e-06
Smp_159690	1123.02	0.140506	0.116318	1.20795	0.227068	0.771256	nuclear pore complex protein nup85	7	-0.0498627	0.451515	-0.401652	255.36	-0.258165	0.520302	0.845413	0.00620554	-1.10358	0.000360508
Smp_057430	1063.64	0.145427	0.125257	1.16103	0.245631	0.793553	ankyrin repeat and zinc finger domain containing protein	7	-0.0279324	0.367244	-0.339312	168.253	-0.265489	0.683593	0.712265	0.18453	-0.977754	0.055161
Smp_168920	1232.07	0.0613591	0.20323	0.301919	0.762714	0.999981	WD repeat domain 36	7	-0.147538	0.573527	-0.425988	221.804	-0.267957	0.5209	1.15311	0.000185996	-1.42106	5.97e-06
Smp_061590	4715.17	-0.100082	0.147747	-0.677388	0.49816	0.965655	regulator of nonsense transcripts 1	7	-0.148333	0.568772	-0.420439	838.816	-0.268517	0.534608	1.14148	0.000565138	-1.40999	1.68e-05
Smp_155060	54686	0.144357	0.162927	0.886024	0.375604	0.90696	phosphatase 2a inhibitor i2pp2a	7	-0.0495579	0.413221	-0.363663	7699.52	-0.270578	0.590171	0.795272	0.0521919	-1.06585	0.00652393
Smp_062530	829.065	-0.130851	0.156685	-0.835116	0.403652	0.92143	Histone lysine N methyltransferase Suv4 20	7	-0.0844756	0.412519	-0.328043	230.97	-0.272808	0.67823	0.81546	0.125875	-1.08827	0.0324741
Smp_175530	265.334	-0.125624	0.150608	-0.834113	0.404217	0.92143	pentatricopeptide repeat containing protein	7	-0.046578	0.55939	-0.512812	38.1162	-0.281983	0.716273	0.9885	0.0839954	-1.27048	0.028948
Smp_126860	1240.15	-0.0492597	0.169918	-0.289903	0.77189	0.999981	rab gap:tbc	7	-0.0635557	0.383558	-0.320003	442.26	-0.285591	0.579317	0.774487	0.0648694	-1.06008	0.00874078
Smp_140800	2391.85	0.0472709	0.12837	0.368238	0.712696	0.999981	neurogenic locus notch protein 2	7	-0.166476	0.633269	-0.466794	130.355	-0.285608	0.732764	1.25779	0.0457156	-1.5434	0.0127537
Smp_106130	14553.3	0.00771309	0.115377	0.0668512	0.9467	0.999981	stress 70 protein, mitochondrial	7	-0.047478	0.383406	-0.335928	1450.34	-0.286518	0.101245	0.752049	4.25e-07	-1.03857	2.52e-12
Smp_009520	546.99	-0.0830065	0.130562	-0.635762	0.524932	0.978866	glutamyl tRNA synthetase	7	-0.122068	0.505575	-0.383507	292.869	-0.287472	0.521915	1.02836	0.00288653	-1.31583	0.000128793
Smp_124320	644.796	-0.0549813	0.136349	-0.403238	0.686773	0.999981	39s ribosomal protein l4 mitochondrial	7	-0.0955112	0.41311	-0.317599	300.22	-0.287569	0.512118	0.836068	0.0161128	-1.12364	0.00102639
Smp_160870	438.336	-0.0550152	0.160483	-0.342809	0.731742	0.999981	nuclear valosin containing protein	7	-0.0418547	0.462932	-0.421077	266.127	-0.288381	0.592192	0.872153	0.0401985	-1.16053	0.00538923
Smp_037200	917.412	-0.0825946	0.16452	-0.502034	0.615643	0.996858	nucleoporin NDC1	7	-0.0616944	0.431018	-0.369323	200.994	-0.294013	0.607782	0.832042	0.0683579	-1.12606	0.0115272
Smp_175430	3247.12	-0.00558747	0.170384	-0.0327934	0.973839	0.999981	DNA damage binding protein 1	7	-0.14115	0.576355	-0.435204	492.318	-0.294715	0.599706	1.17081	0.00675099	-1.46552	0.000566654
Smp_129110	2949.71	-0.0605794	0.115811	-0.52309	0.600911	0.996125	fanconi associated nuclease 1	7	-0.0205427	0.430463	-0.40992	297.63	-0.296626	0.630114	0.754453	0.14227	-1.05108	0.0308511
Smp_129630	555.017	-0.107075	0.129049	-0.829726	0.406694	0.922135	Pseudouridylate synthase 7	7	-0.0930502	0.362605	-0.269555	100.548	-0.297657	0.645002	0.731744	0.167794	-1.0294	0.0429101
Smp_199100	340.702	0.153231	0.150187	1.02027	0.3076	0.853606	TFIIH basal transcription factor complex	7	-0.233448	0.742667	-0.509219	133.926	-0.298997	0.557037	1.53133	2.58e-05	-1.83033	1.03e-06
Smp_193440	5451.76	0.0313781	0.119096	0.263468	0.79219	0.999981	Cell division cycle and apoptosis regulator	7	-0.11587	0.527916	-0.412046	1509.35	-0.302318	0.318189	1.0395	2.34e-05	-1.34182	3.24e-08
Smp_162310	6161.97	-0.0352894	0.13605	-0.259386	0.795337	0.999981	serrate RNA effector molecule	7	-0.0761547	0.427284	-0.351129	1110.68	-0.306017	0.385351	0.828029	0.004495	-1.13405	6.51e-05
Smp_090070	492.041	0.0586184	0.151181	0.387738	0.69821	0.999981	protein hira	7	-0.0585256	0.575055	-0.516529	115.276	-0.30694	0.778836	0.960123	0.281412	-1.26706	0.128915
Smp_125790	1470.85	-0.0147989	0.134686	-0.109877	0.912507	0.999981	Actin protein 5	7	-0.158349	0.591596	-0.433247	264.654	-0.307943	0.526271	1.20967	0.00103369	-1.51761	3.83e-05
Smp_042980	751.185	-0.140353	0.194098	-0.723103	0.469616	0.954322	mevalonate kinase	7	-0.0310869	0.344432	-0.313345	265.573	-0.307955	0.236432	0.655483	0.00200539	-0.963437	8.48e-06
Smp_034700	1276.41	-0.0723814	0.191808	-0.377365	0.705903	0.999981	protein SCO1, mitochondrial	7	-0.0416867	0.343885	-0.302198	493.852	-0.308045	0.603411	0.659213	0.19495	-0.967258	0.0414696
Smp_065420	800.589	-0.0334718	0.135389	-0.247228	0.804732	0.999981	hypothetical protein	7	-0.0839748	0.478633	-0.394658	560.529	-0.310278	0.262114	0.93617	3.19e-05	-1.24645	3.2e-08
Smp_148530	13208.5	-0.455073	0.108624	-4.18943	2.8e-05	0.000737483	major egg antigen	7	-0.327924	0.904669	-0.576745	2479.96	-0.310294	0.560505	1.86866	2.58e-06	-2.17896	3.06e-08
Smp_049510	3543.72	0.00192061	0.10721	0.0179144	0.985707	0.999981	WD repeat containing protein 33	7	-0.0722534	0.455903	-0.38365	882.781	-0.311093	0.502107	0.882458	0.0182016	-1.19355	0.00101904
Smp_033760	2201.12	0.0502911	0.126412	0.397834	0.690753	0.999981	hypothetical protein	7	-0.103739	0.507979	-0.40424	498.403	-0.313309	0.2266	1.01854	8.56e-07	-1.33185	2.5e-10
Smp_005860	6103.41	0.149538	0.125734	1.18932	0.234312	0.780672	heterogeneous nuclear ribonucleoprotein k	7	-0.062228	0.47332	-0.411092	2646.96	-0.316301	0.639525	0.866956	0.122865	-1.18326	0.0255925
Smp_066710	298.585	0.227048	0.191013	1.18865	0.234578	0.780672	hypothetical protein	7	-0.160258	0.697138	-0.53688	76.9128	-0.317727	0.610374	1.33571	0.00288638	-1.65344	0.000366041
Smp_172700	1272.62	0.426218	0.153788	2.77146	0.00558053	0.0642427	cyclin dependent kinase 6	7	-0.105906	0.561003	-0.455096	133.901	-0.318947	0.584772	1.12833	0.011386	-1.44728	0.00116306
Smp_162030	456.575	0.0747619	0.145248	0.514718	0.60675	0.996858	folylpolyglutamate synthase, mitochondrial	7	-0.0755613	0.525549	-0.449988	80.4224	-0.327926	0.510575	0.985289	0.00782471	-1.31321	0.000606496
Smp_096010	1315.46	0.0416786	0.15414	0.270395	0.786856	0.999981	protein tumorous imaginal discs	7	-0.0360344	0.397202	-0.361168	870.581	-0.328621	0.569084	0.724943	0.139694	-1.05356	0.0221131
Smp_211100	2703.36	-0.0958904	0.123437	-0.776836	0.437256	0.943176	inner nuclear membrane protein man1	7	-0.298042	0.822153	-0.524111	819.266	-0.329989	0.545028	1.72569	2.51e-05	-2.05568	4.27e-07
Smp_099630	9395.01	0.109236	0.110248	0.990821	0.321773	0.865767	fragile X related 1, frx1	7	-0.00805074	0.31327	-0.30522	1963.99	-0.330597	0.442943	0.578113	0.129779	-0.90871	0.0103566
Smp_068950	1790.2	-0.117761	0.124116	-0.9488	0.342722	0.882656	Chromatin assembly factor 1 small subunit-like protein	7	-0.0593067	0.424564	-0.365257	706.753	-0.331936	0.577714	0.79958	0.110259	-1.13152	0.0167727
Smp_094640	1730.9	-0.0794241	0.120894	-0.656975	0.511197	0.972334	zinc finger protein	7	-0.00911853	0.357048	-0.347929	300.066	-0.335679	0.471488	0.652537	0.100212	-0.988216	0.00877737
Smp_163430	1509.3	0.0698282	0.155383	0.449394	0.653147	0.999981	hypothetical protein	7	-0.0603334	0.51533	-0.454997	475.131	-0.338387	0.593197	0.93915	0.069	-1.27754	0.00994128
Smp_156060	848.998	-0.0328818	0.134736	-0.244047	0.807194	0.999981	pre mRNA splicing factor ATP dependent RNA	7	-0.151297	0.480086	-0.32879	215.369	-0.339861	0.702196	0.938569	0.202972	-1.27843	0.0650199
Smp_002230	1393.29	-0.0597126	0.104886	-0.569309	0.569146	0.988013	ESF1	7	-0.0937006	0.429999	-0.336298	453.888	-0.341232	0.55916	0.830664	0.0870833	-1.1719	0.011194
Smp_147950	3011.9	0.0919867	0.126552	0.726871	0.467305	0.953416	bromodomain containing 2	7	-0.164865	0.604689	-0.439824	604.6	-0.34156	0.285533	1.22687	1.73e-06	-1.56843	9.69e-10
Smp_158090	329.435	-0.331462	0.150453	-2.2031	0.0275875	0.219196	BTB:POZ domain containing protein 12	7	-0.0192003	0.432314	-0.413114	147.524	-0.342961	0.399466	0.775197	0.01735	-1.11816	0.000654309
Smp_009400	3737.25	0.14447	0.143652	1.00569	0.314564	0.861455	Serine:arginine repetitive matrix protein 2	7	-0.042928	0.405117	-0.362189	797.738	-0.343649	0.383809	0.765697	0.0216171	-1.10935	0.000574925
Smp_050080	677.158	-0.0675018	0.14012	-0.481742	0.629989	0.997803	2 hydroxyglutarate dehydrogenase	7	-0.00876021	0.376825	-0.368065	338.364	-0.345602	0.398843	0.675211	0.0522459	-1.02081	0.00237817
Smp_043610	1359.93	-0.111448	0.12774	-0.872457	0.382959	0.912636	hypothetical protein	7	-0.0775282	0.467339	-0.389811	695.055	-0.346561	0.359392	0.911738	0.00362156	-1.2583	4.06e-05
Smp_082670	666.728	-0.146284	0.145509	-1.00532	0.314741	0.861455	AAA family ATPase	7	-0.057145	0.439176	-0.382031	212.73	-0.347554	0.325779	0.854603	0.00263379	-1.20216	2.82e-05
Smp_094630	5248.09	0.101133	0.131596	0.768512	0.442183	0.94631	nuclear receptor coactivator 5	7	-0.0555219	0.455307	-0.399785	1153.75	-0.349852	0.0520172	0.878329	1.36e-08	-1.22818	2.49e-15
Smp_051230	4818.15	0.0301343	0.12746	0.236423	0.813105	0.999981	tar DNA binding protein	7	-0.0247887	0.436708	-0.41192	2706.84	-0.350765	0.54267	0.777581	0.11308	-1.12835	0.014285
Smp_015780	238.377	-0.0734504	0.166884	-0.440128	0.659844	0.999981	ATPase N2B	7	-0.0744113	0.486578	-0.412167	160.718	-0.351474	0.396364	0.907124	0.00562229	-1.2586	0.000144066
Smp_098760	2857.45	0.048473	0.161564	0.300023	0.76416	0.999981	F box:WD repeat containing protein	7	-0.0550174	0.404177	-0.34916	637.874	-0.352225	0.394384	0.807795	0.0199601	-1.16002	0.000561238
Smp_032320	1915.97	0.00164332	0.231191	0.00710808	0.994329	0.999981	FUS interacting serine arginine rich protein 1	7	0.0109293	0.400353	-0.411283	2603.76	-0.35224	0.563917	0.681637	0.202163	-1.03388	0.0357459
Smp_069760	2908.64	0.045138	0.179721	0.251156	0.801693	0.999981	armadillo repeat containing protein	7	-0.050479	0.444132	-0.393653	404.007	-0.354889	0.233654	0.844454	0.000626226	-1.19934	1.19e-06
Smp_000460	10494.9	0.128574	0.167467	0.767754	0.442633	0.94631	Nice 4 protein	7	-0.017561	0.334735	-0.317174	919.982	-0.355265	0.257762	0.621512	0.0250172	-0.976777	0.000235996
Smp_002820	2322.28	0.0259628	0.100015	0.25959	0.79518	0.999981	zinc finger CCCH domain containing protein 4	7	-0.0528314	0.485163	-0.432332	647.482	-0.356947	0.419641	0.875477	0.0170322	-1.23242	0.000537948
Smp_151750	402.382	-0.0335028	0.1476	-0.226983	0.820437	0.999981	meiotic recombination protein rec8	7	-0.239751	0.753262	-0.513511	88.9841	-0.357909	0.671751	1.44677	0.0236853	-1.80468	0.00450778
Smp_175510	3803.08	-0.105435	0.132188	-0.797612	0.425096	0.936746	hypothetical protein	7	-0.0735156	0.477463	-0.403948	52.6435	-0.35845	0.755094	0.744456	0.460774	-1.10291	0.229008
Smp_180990	407.729	-0.0262728	0.174124	-0.150886	0.880066	0.999981	heat shock proteinB1 associated protein 1	7	0.0334826	0.323216	-0.356699	99.0745	-0.363227	0.410142	0.573688	0.123595	-0.936915	0.0101756
Smp_015220	992.128	0.0830123	0.151979	0.546208	0.584923	0.991299	transcription initiation factor TFIID subunit 4	7	-0.00661093	0.387904	-0.381293	268.207	-0.363746	0.513195	0.705743	0.137015	-1.06949	0.016979
Smp_043100	5457.92	0.0860899	0.190372	0.452219	0.651111	0.999981	Heterogeneous nuclear ribonucleoprotein A1	7	-0.0501882	0.501745	-0.451557	2535.81	-0.364557	0.554361	0.900505	0.0803577	-1.26506	0.00955239
Smp_026390	661.112	-0.0737346	0.173261	-0.42557	0.670421	0.999981	zinc finger, AN1 type domain 2B	7	-0.0257632	0.509978	-0.484215	86.2334	-0.364954	0.572845	0.925989	0.0706267	-1.29094	0.0108267
Smp_082240	7706.1	-0.0115138	0.293024	-0.0392929	0.968657	0.999981	histone H3	7	0.0111922	0.386262	-0.397454	3667.83	-0.365115	0.525509	0.672058	0.183583	-1.03717	0.0261744
Smp_076660	3329.81	-0.0995432	0.139647	-0.712821	0.475957	0.956644	DNA polymerase delta small subunit	7	-0.0896128	0.552117	-0.462504	750.923	-0.367882	0.430287	1.05269	0.00551079	-1.42058	0.000126493
Smp_201650	394.954	0.224	0.165961	1.34971	0.177109	0.692754	hypothetical protein	7	-0.0198796	0.457203	-0.437323	61.1452	-0.367922	0.478381	0.7994	0.0426753	-1.16732	0.0043858
Smp_048970	1120.9	0.052001	0.16803	0.309475	0.75696	0.999981	Mediator of RNA polymerase II transcription	7	-0.0296025	0.37663	-0.347028	398.836	-0.375719	0.423453	0.717037	0.0754122	-1.09276	0.00456387
Smp_101240	212.972	-0.125306	0.214738	-0.583527	0.559538	0.985603	phenylalanyl tRNA synthetase alpha chain	7	0.00810276	0.353954	-0.362057	110.081	-0.375891	0.417946	0.622483	0.110552	-0.998374	0.0088811
Smp_011960	644.549	0.0665686	0.142003	0.468782	0.639226	0.999328	inositol pentakisphosphate 2 kinase	7	0.0163322	0.423145	-0.439477	199.647	-0.3768	0.433014	0.700046	0.0870072	-1.07685	0.00617164
Smp_021550	500.815	0.263935	0.188034	1.40365	0.160423	0.657138	nucleotide excision repair protein	7	-0.235035	0.76603	-0.530995	111.147	-0.377371	0.634747	1.48894	0.0140338	-1.86631	0.00189445
Smp_075450	482.171	0.105944	0.161683	0.655258	0.512301	0.972343	heparan sulfate 2 O sulfotransferase HS2ST1	7	-0.0932228	0.640439	-0.547217	141.229	-0.377959	0.382149	1.17084	0.00040924	-1.54879	5.5e-06
Smp_046750	1624	0.104636	0.13336	0.784612	0.432681	0.941245	protein will die slowly	7	0.0360023	0.318676	-0.354678	365.117	-0.386317	0.333316	0.552144	0.125535	-0.938461	0.00553561
Smp_128440	763.252	-0.0336017	0.147436	-0.227908	0.819718	0.999981	run and fyve domain containing protein	7	0.0351015	0.337478	-0.372579	165.832	-0.388661	0.38439	0.56479	0.152966	-0.953452	0.010926
Smp_065170	1119.06	0.133758	0.19266	0.694267	0.487515	0.959644	hypothetical protein	7	0.0542432	0.325122	-0.379365	117.597	-0.390746	0.37686	0.541603	0.159982	-0.932348	0.0120991
Smp_084770	1693.51	-0.235513	0.15272	-1.54212	0.123044	0.579303	nuclear factor related to kappa B binding	7	0.0143396	0.340391	-0.354731	168.3	-0.391684	0.514749	0.589079	0.274847	-0.980763	0.0469254
Smp_064510	2661.44	0.0635341	0.167562	0.379168	0.704563	0.999981	RNA binding protein NOB1	7	-0.0789829	0.497554	-0.418571	839.96	-0.391693	0.197487	0.956652	0.000204203	-1.34835	1.08e-07
Smp_019840	1448.14	0.0269094	0.113615	0.236846	0.812776	0.999981	DNA ligase 1	7	-0.228655	0.829458	-0.600803	487.268	-0.393078	0.324874	1.61619	2.96e-07	-2.00927	1.91e-10
Smp_158280	338.045	0.255798	0.164089	1.5589	0.119021	0.57176	zinc finger protein	7	-0.19837	0.706895	-0.508525	152.409	-0.394104	0.407985	1.40835	0.0001063	-1.80245	1.15e-06
Smp_153010	2005.75	0.0183051	0.146539	0.124916	0.90059	0.999981	SUMO ligase	7	-0.0937653	0.550209	-0.456444	324.341	-0.394164	0.555054	1.02135	0.0625985	-1.41551	0.00713459
Smp_072350	2130.65	-0.070787	0.135112	-0.523915	0.600338	0.996125	serine:threonine protein phosphatase 4	7	-0.0358722	0.398193	-0.362321	502.559	-0.394961	0.430753	0.730058	0.0950391	-1.12502	0.00630391
Smp_103950	4730.05	0.203767	0.152081	1.33986	0.180291	0.699535	cyclin dependent kinase 10	7	-0.0375807	0.459815	-0.422235	1426.63	-0.394972	0.497145	0.829725	0.0947036	-1.2247	0.00874875
Smp_101310	779.873	0.00714377	0.121819	0.0586425	0.953237	0.999981	histone H4 transcription factor	7	0.0258511	0.338186	-0.364037	160.935	-0.395975	0.275661	0.571542	0.0687036	-0.967518	0.00170751
Smp_007660	1125.43	-0.111923	0.138912	-0.80571	0.42041	0.932757	transcription elongation factor A protein 1	7	0.0230894	0.337866	-0.360955	446.085	-0.397323	0.0899906	0.569384	0.00629305	-0.966707	2.48e-06
Smp_153850	663.698	0.660455	0.156851	4.21072	2.55e-05	0.000679637	zinc finger ch type domain containing protein	7	-0.074903	0.630429	-0.555526	39.7538	-0.402742	0.565267	1.10851	0.0360977	-1.51125	0.00518723
Smp_142550	1979.04	-0.0639596	0.135116	-0.473369	0.63595	0.998794	nuclear pore membrane	7	-0.339753	1.00802	-0.668269	139.679	-0.40289	0.546187	2.02548	3.05e-05	-2.42837	8.96e-07
Smp_068070	1612.1	-0.200993	0.106278	-1.8912	0.0585975	0.369522	hypothetical protein	7	-0.0282253	0.408129	-0.379904	589.457	-0.403842	0.200082	0.739542	0.00703452	-1.14338	1.85e-05
Smp_149500	1739.61	0.109498	0.167022	0.655587	0.51209	0.972343	eukaryotic elongation factor 2 kinase	7	-0.105334	0.534503	-0.429169	253.801	-0.40523	0.394509	1.04685	0.00702557	-1.45208	0.000146785
Smp_084870	2276.76	0.0858453	0.122343	0.701676	0.482881	0.958379	pre mRNA cleavage complex 2 protein Pcf11	7	-0.0104604	0.351353	-0.340893	447.921	-0.405284	0.237651	0.652044	0.0318663	-1.05733	0.000300449
Smp_062270	1922.09	0.151284	0.247518	0.611202	0.541066	0.98412	lin 52	7	0.00344266	0.375967	-0.37941	24.1376	-0.40584	0.657925	0.678084	0.376918	-1.08392	0.143109
Smp_142780	945.712	-0.0103238	0.114975	-0.0897914	0.928453	0.999981	retinoblastoma binding protein 5	7	-0.110959	0.544696	-0.433737	170.166	-0.407124	0.417902	1.07026	0.007907	-1.47738	0.00022367
Smp_004990	7956.5	0.128499	0.153411	0.837611	0.402249	0.92143	T complex protein 1 subunit zeta	7	-0.0953294	0.560324	-0.464995	3056.25	-0.4082	0.420424	1.06114	0.0118409	-1.46934	0.000305221
Smp_149210	473.539	0.0730479	0.146293	0.499325	0.61755	0.996858	hypothetical protein	7	-0.118268	0.527827	-0.40956	60.2747	-0.408204	0.629325	1.01839	0.140049	-1.42659	0.0321392
Smp_196800	985.032	-0.189894	0.136183	-1.3944	0.163197	0.6643	PHD finger protein 14	7	0.0234963	0.324332	-0.347828	344.283	-0.410688	0.163586	0.54745	0.0382373	-0.958138	0.000178896
Smp_165900	897.146	-0.0405375	0.129563	-0.31288	0.754372	0.999981	n2n2 dimethylguanosine tRNA methyltranserase	7	-0.0976782	0.542816	-0.445138	541.669	-0.41137	0.229152	1.01671	0.000394244	-1.42808	4.77e-07
Smp_083120	453.063	-0.105752	0.135045	-0.783088	0.433575	0.941517	mitochondrial chaperone BCS1	7	0.0161621	0.326157	-0.342319	54.0403	-0.413339	0.530498	0.518202	0.375107	-0.931541	0.0882638
Smp_123450	2803.26	-0.0573238	0.115789	-0.495072	0.620549	0.996858	hypothetical protein	7	-0.148405	0.574617	-0.426212	357.822	-0.413653	0.497459	1.14078	0.0205389	-1.55443	0.00116918
Smp_146340	1163.27	0.0771613	0.111678	0.69093	0.48961	0.960354	ATP dependent RNA helicase DDX27	7	-0.115962	0.636208	-0.520246	305.939	-0.414514	0.349952	1.17929	0.000996906	-1.59381	8.05e-06
Smp_131420	481.474	-0.0822124	0.213491	-0.385086	0.700174	0.999981	testis specific protein pbs13	7	-0.00409149	0.387405	-0.383314	74.4438	-0.415154	0.541878	0.699631	0.232975	-1.11478	0.0436317
Smp_153750	1164.47	-0.0311782	0.262228	-0.118897	0.905357	0.999981	hypothetical protein	7	0.0325887	0.338444	-0.371033	701.328	-0.416466	0.458872	0.562185	0.280212	-0.978651	0.0366823
Smp_042650	299.172	0.0141203	0.147417	0.095785	0.923691	0.999981	#N/A	7	-0.0570323	0.396323	-0.33929	99.2392	-0.4167	0.476884	0.739408	0.132711	-1.15611	0.0148656
Smp_087760	4230.35	0.288167	0.271718	1.06054	0.288899	0.838076	Ferritin 1 heavy chain	7	-0.0255407	0.496438	-0.470897	851.858	-0.417594	0.417231	0.895369	0.0408566	-1.31296	0.00170751
Smp_122830	6896.33	0.238657	0.118211	2.0189	0.0434976	0.304174	Ataxin 2, N terminal,domain containing protein	7	-0.0439778	0.468216	-0.424238	1035.49	-0.419795	0.462115	0.812872	0.0996627	-1.23267	0.00785365
Smp_126850	3223.16	0.0976992	0.105749	0.923876	0.355551	0.893988	RNA binding protein 5	7	-0.00172183	0.42859	-0.426868	575.597	-0.420993	0.175064	0.738252	0.00674678	-1.15924	1.2e-05
Smp_169030	1021.19	-0.346336	0.170736	-2.02849	0.0425099	0.299801	asparaginyl tRNA synthetase	7	0.0298446	0.425593	-0.455437	48.7953	-0.425363	0.516725	0.70806	0.190343	-1.13342	0.0324192
Smp_078700	1065.37	0.0269771	0.116383	0.231795	0.816697	0.999981	hypothetical protein	7	-0.017554	0.397352	-0.379798	148.929	-0.4262	0.422576	0.68944	0.138854	-1.11564	0.0112623
Smp_130640	981.164	0.204823	0.11881	1.72395	0.0847178	0.470639	calpain 7 protein	7	-0.0250732	0.420732	-0.395659	225.83	-0.427571	0.162898	0.792871	0.00206484	-1.22044	2.61e-06
Smp_061300	566.503	-0.109763	0.161139	-0.681168	0.495766	0.964063	transcription initiation factor tfiid subunit 6	7	0.0446592	0.295336	-0.339995	140.775	-0.427664	0.563917	0.481668	0.503139	-0.909332	0.14447
Smp_075290	2850.76	0.0154702	0.132465	0.116787	0.907029	0.999981	hypothetical protein	7	0.054426	0.290461	-0.344887	427.129	-0.429553	0.0806989	0.457682	0.045645	-0.887235	5.1e-05
Smp_076450	331.003	0.100811	0.144851	0.695959	0.486455	0.959186	hypothetical protein	7	-0.0752144	0.421096	-0.345881	118.957	-0.432425	0.51703	0.780692	0.171072	-1.21312	0.0246819
Smp_169610	4162.24	-0.279179	0.128297	-2.17604	0.0295522	0.231596	zinc finger, DHHC type containing 2	7	0.0578907	0.282141	-0.340032	359.386	-0.434819	0.23404	0.484832	0.158375	-0.919652	0.00387887
Smp_061560	176.01	0.121512	0.249671	0.486688	0.626479	0.997803	mitochondrial import inner membrane translocase	7	-0.123908	0.669199	-0.545291	101.914	-0.435431	0.523099	1.24552	0.0176189	-1.68095	0.00146528
Smp_041480	3127.47	-0.0464995	0.115655	-0.402052	0.687646	0.999981	rna recognition motif (rrm) domain containing protein	7	0.0148637	0.3481	-0.362964	952.601	-0.435676	0.0873154	0.613805	0.00846815	-1.04948	2.85e-06
Smp_153920	2304.54	0.240916	0.171242	1.40688	0.159464	0.655515	cyclin G2	7	-0.00545292	0.511883	-0.50643	54.7258	-0.436578	0.64025	0.81803	0.314889	-1.25461	0.096482
Smp_013070	4389.05	0.0307952	0.142283	0.216436	0.828648	0.999981	one cut domain family member	7	-0.0246134	0.405184	-0.38057	1078.85	-0.437038	0.309052	0.732521	0.0565263	-1.16956	0.00125036
Smp_053940	6280.36	-0.0224127	0.18709	-0.119797	0.904644	0.999981	heterogeneous nuclear ribonucleoprotein a	7	-0.0550952	0.499528	-0.444433	2975.35	-0.438458	0.524377	0.878855	0.140386	-1.31731	0.0175144
Smp_133120	8492.43	0.0148475	0.134839	0.110113	0.91232	0.999981	DEAD box ATP dependent RNA helicase	7	-0.0332116	0.438273	-0.405062	3021.58	-0.439735	0.418641	0.792042	0.0992175	-1.23178	0.00602691
Smp_171170	2444.66	0.0521629	0.183292	0.284588	0.77596	0.999981	leucine rich repeat and WD repeat containing	7	-0.104251	0.574832	-0.470582	244.121	-0.441118	0.58472	1.10251	0.0999499	-1.54363	0.0154449
Smp_090140	8410	-0.107223	0.154645	-0.69335	0.48809	0.959988	Ftz F1 interacting protein	7	-0.0165229	0.360289	-0.343766	1281.64	-0.441202	0.466589	0.634555	0.254062	-1.07576	0.0322703
Smp_019170	4325.68	-0.12941	0.16895	-0.765965	0.443697	0.946752	lysine specific demethylase lid	7	-0.0278436	0.408464	-0.38062	381.014	-0.442379	0.513067	0.735965	0.220989	-1.17834	0.0328462
Smp_093720	155.851	0.964118	0.245727	3.92353	8.73e-05	0.00198986	hypothetical protein	7	0.0530585	0.315195	-0.368254	95.8536	-0.445179	0.418641	0.523015	0.300447	-0.968194	0.0372764
Smp_152110	645.103	0.248324	0.206954	1.1999	0.230179	0.777543	hypothetical protein	7	0.00251111	0.408102	-0.410613	38.846	-0.446666	0.609656	0.678602	0.38398	-1.12527	0.117199
Smp_157370	744.144	0.197904	0.185096	1.0692	0.284981	0.833322	ribosomal protein s kinase alpha	7	-0.150426	0.774521	-0.624095	195.251	-0.447505	0.519316	1.42046	0.0087286	-1.86796	0.000502311
Smp_181480	422.316	0.00143171	0.16488	0.00868331	0.993072	0.999981	tRNA (uracil O(2)) methyltransferase	7	0.0431322	0.374982	-0.418114	175.066	-0.448561	0.408169	0.572017	0.25134	-1.02058	0.0258706
Smp_150700	169.119	0.0510483	0.306762	0.16641	0.867834	0.999981	aldo keto reductase family 1, member B4	7	-0.249131	0.797841	-0.54871	79.4892	-0.450159	0.532227	1.57601	0.0035051	-2.02617	0.000222762
Smp_206010	4754.42	-0.113	0.104098	-1.08552	0.277692	0.825776	protein LSM14 B B	7	0.0423012	0.300866	-0.343167	813.443	-0.452403	0.466882	0.478619	0.430648	-0.931022	0.077251
Smp_157250	1206.24	0.108879	0.148646	0.732472	0.463881	0.952792	hypothetical protein	7	-0.0261796	0.509516	-0.483336	286.601	-0.452426	0.278243	0.864553	0.0157939	-1.31698	0.00015971
Smp_043600	31.0082	-0.428683	0.350154	-1.22427	0.22085	0.76249	hypothetical protein	7	-0.0322353	0.603076	-0.570841	191.953	-0.454155	0.529704	0.997301	0.0979997	-1.45146	0.0116459
Smp_021950	1838.25	0.0842558	0.167062	0.504338	0.614024	0.996858	suppressor of hairy wing	7	0.0348119	0.332728	-0.36754	164.464	-0.45662	0.369846	0.531666	0.265854	-0.988286	0.0233236
Smp_147160	176.889	-0.304859	0.167778	-1.81704	0.0692114	0.41433	Cadmium metallothionein (MT Cd)	7	0.0625861	0.389852	-0.452438	41.8159	-0.458615	0.422045	0.609118	0.192651	-1.06773	0.0244456
Smp_044550	193.809	-0.273134	0.192899	-1.41594	0.156793	0.6515	far upstream (fuse) binding protein	7	0.0192567	0.424313	-0.44357	120.826	-0.459802	0.538412	0.638953	0.344914	-1.09875	0.0752408
Smp_068780	1517.54	-0.00597136	0.182106	-0.0327905	0.973842	0.999981	nuclear hormone receptor FTZ F1 beta	7	-0.0106576	0.488587	-0.477929	287.31	-0.461611	0.323475	0.854591	0.0342574	-1.3162	0.000729499
Smp_049250	5113.06	-0.236446	0.131165	-1.80266	0.0714424	0.423872	major egg antigen	7	-0.170593	0.755376	-0.584783	2673.97	-0.464341	0.370199	1.43851	0.00072119	-1.90285	4.66e-06
Smp_103810	3332.73	0.10745	0.110793	0.969824	0.332134	0.873199	hypothetical protein	7	-0.291607	0.972488	-0.68088	1218.35	-0.465963	0.195383	1.94304	3.67e-11	-2.409	1.8e-16
Smp_162660	102.675	0.0161365	0.260909	0.0618472	0.950685	0.999981	glutamine dependent NAD(+) synthetase	7	-0.0762636	0.555391	-0.479128	39.0069	-0.46994	0.518098	1.02569	0.0662298	-1.49563	0.00890576
Smp_198050	2121	-0.150682	0.314818	-0.478632	0.6322	0.99852	filamin	7	-0.103036	0.524273	-0.421237	127.85	-0.470177	0.625847	0.960442	0.251794	-1.43062	0.0650718
Smp_059210	7707.37	0.0742375	0.132522	0.560189	0.575351	0.990953	hypothetical protein	7	0.0496963	0.340303	-0.39	1095.69	-0.472497	0.0194412	0.538596	0.00465709	-1.01109	3.31e-08
Smp_073830	1176.86	0.0146565	0.113006	0.129696	0.896807	0.999981	integrator complex subunit 11	7	-0.054973	0.543865	-0.488892	278.519	-0.473966	0.307992	0.978231	0.013208	-1.4522	0.00016424
Smp_092170	636.126	0.145984	0.148105	0.985685	0.324288	0.867695	regulation of nuclear pre mRNA domain containing protein	7	-0.00835608	0.45599	-0.447634	323.105	-0.474174	0.234726	0.779976	0.0265175	-1.25415	0.00022086
Smp_063250	1267.2	-0.0819579	0.191219	-0.428607	0.668209	0.999981	ubiquinol cytochrome c reductase complex	7	0.0545312	0.371659	-0.42619	378.006	-0.475254	0.168891	0.59934	0.0584717	-1.07459	0.000353471
Smp_162940	638.054	-0.0666317	0.152483	-0.436978	0.662127	0.999981	Amine oxidase	7	-0.130666	0.709629	-0.578962	147.39	-0.475772	0.589456	1.31628	0.0653369	-1.79205	0.00926813
Smp_212210	834.543	0.0636149	0.189303	0.336049	0.736834	0.999981	chromatin specific transcription elongation	7	-0.162436	0.668849	-0.506413	69.2015	-0.476676	0.515386	1.27408	0.0266401	-1.75075	0.00222455
Smp_085480	1399.23	-0.066062	0.156695	-0.421596	0.67332	0.999981	histone deacetylase complex subunit sap18	7	0.0724131	0.280436	-0.352849	350.559	-0.476726	0.113522	0.463944	0.106465	-0.94067	0.000461107
Smp_050920	1434.54	-0.034226	0.1668	-0.205192	0.837422	0.999981	transformer 2 protein	7	0.0577012	0.361851	-0.419552	340.79	-0.478422	0.201805	0.578837	0.0942871	-1.05726	0.00117033
Smp_186560	928.431	0.0208111	0.170569	0.12201	0.902891	0.999981	39S ribosomal protein L18, mitochondrial	7	0.0494925	0.302185	-0.351678	185.86	-0.478574	0.276163	0.457833	0.281707	-0.936407	0.0148408
Smp_075210	1797.97	0.081369	0.213591	0.380956	0.703236	0.999981	prohibitin	7	-0.000849289	0.39887	-0.398021	1033.25	-0.482884	0.419244	0.692718	0.207719	-1.1756	0.0188678
Smp_067010	1228.37	-0.327761	0.132562	-2.47251	0.0134167	0.130627	RUN domain containing protein 1	7	-0.0170299	0.394976	-0.377946	699.94	-0.484196	0.319132	0.709892	0.109807	-1.19409	0.00378991
Smp_158900	2829.75	-0.0276595	0.12185	-0.226995	0.820427	0.999981	hypothetical protein	7	0.0645826	0.299466	-0.364048	226.199	-0.48519	0.279184	0.452576	0.301485	-0.937766	0.0168745
Smp_059710	3408.88	0.203615	0.133671	1.52325	0.127695	0.588764	hypothetical protein	7	0.0204391	0.35355	-0.373989	483.189	-0.487689	0.373852	0.586536	0.260786	-1.07423	0.0219337
Smp_180380	562.259	-0.0391313	0.16627	-0.235348	0.813939	0.999981	origin recognition complex protein 1	7	-0.164071	0.686677	-0.522606	203.914	-0.488091	0.204983	1.31953	2.12e-05	-1.80762	1.09e-08
Smp_087440	1397.16	0.0711337	0.168375	0.422471	0.672681	0.999981	39S ribosomal protein L3, mitochondrial	7	-0.0111478	0.468428	-0.457281	403.651	-0.49096	0.211851	0.824814	0.0169807	-1.31577	8.42e-05
Smp_054450	128.26	0.0345219	0.290903	0.118672	0.905536	0.999981	Protein archease	7	0.101249	0.334249	-0.435498	72.4781	-0.491582	0.476379	0.471369	0.474976	-0.962951	0.100045
Smp_031010	1264.44	-0.0275054	0.120088	-0.229044	0.818835	0.999981	eukaryotic initiation factor 4A III	7	0.0468817	0.301853	-0.348735	290.788	-0.491673	0.0965048	0.488247	0.079143	-0.97992	0.000203619
Smp_158740	1832.23	0.208212	0.10752	1.9365	0.0528067	0.34583	hypothetical protein	7	-0.0985691	0.613695	-0.515126	383.339	-0.492063	0.472414	1.12738	0.0479047	-1.61944	0.00310715
Smp_171150	833.675	0.137185	0.134657	1.01877	0.308312	0.854466	protein arginine N methyltransferase 5	7	-0.136141	0.683349	-0.547208	368.102	-0.492863	0.071329	1.31216	6.31e-09	-1.80503	7.37e-15
Smp_004280	743.663	0.201968	0.251653	0.802564	0.422227	0.933184	hypothetical protein	7	0.0631338	0.348643	-0.411777	170.762	-0.493548	0.421838	0.533055	0.361308	-1.0266	0.0496633
Smp_048620	409.572	0.0326244	0.153008	0.21322	0.831155	0.999981	exosome complex component RRP45	7	-0.0522261	0.556825	-0.504598	293.034	-0.494205	0.0722617	1.01171	1.33e-05	-1.50591	1.95e-10
Smp_178850	3938.8	-0.00292722	0.117516	-0.0249091	0.980127	0.999981	poly(A) polymerase	7	-0.0782682	0.542046	-0.463778	1066.05	-0.494973	0.113027	1.01549	0.00020979	-1.51047	1.69e-08
Smp_023990	1271.31	0.192905	0.170267	1.13296	0.257231	0.807971	YY1 transcription factor	7	0.00474369	0.431696	-0.436439	231.79	-0.495795	0.157198	0.728446	0.0176268	-1.22424	4.99e-05
Smp_055310	1162.32	0.278646	0.161086	1.72979	0.0836671	0.467069	histone lysine n methyltransferase setd8	7	-0.274243	0.887458	-0.613215	104.308	-0.495823	0.559455	1.68482	0.010399	-2.18065	0.000812922
Smp_000440	2958.72	0.157913	0.141896	1.11288	0.265759	0.8137	#N/A	7	0.0326714	0.314713	-0.347385	253.366	-0.496493	0.178485	0.530514	0.125268	-1.02701	0.00151888
Smp_176380	841.452	-0.0275828	0.113873	-0.242225	0.808606	0.999981	hypothetical protein	7	0.0530232	0.289173	-0.342196	275.22	-0.49682	0.33443	0.501343	0.317157	-0.998163	0.0253334
Smp_164790	191.125	0.0353326	0.214682	0.164581	0.869274	0.999981	28S ribosomal protein S9, mitochondrial	7	0.0158105	0.344665	-0.360475	27.3297	-0.497387	0.478558	0.535506	0.373325	-1.03289	0.0777666
Smp_057020	405.844	0.0715549	0.154896	0.461956	0.644113	0.999981	ATP dependent RNA helicase DDX31	7	-0.0927953	0.629749	-0.536953	222.294	-0.498683	0.262247	1.11775	0.00260633	-1.61643	1.16e-05
Smp_041740	11561.8	0.0581431	0.128853	0.451237	0.651819	0.999981	t complex protein 1 subunit gamma	7	-0.0959538	0.600534	-0.50458	3202.12	-0.502536	0.311837	1.10235	0.0100707	-1.60489	9.53e-05
Smp_033710	7078.6	0.0776069	0.141916	0.54685	0.584482	0.991299	ATP dependent RNA helicase DDX3X	7	-0.0711112	0.588694	-0.517583	1189.95	-0.50784	0.234726	1.07067	0.00386519	-1.57851	1.08e-05
Smp_093370	1021.18	-0.241026	0.125839	-1.91535	0.0554477	0.358679	hypothetical protein	7	0.0607598	0.359283	-0.420042	256.627	-0.50805	0.135212	0.568515	0.0705922	-1.07657	0.000324984
Smp_035360	704.962	0.0673355	0.11628	0.579082	0.562534	0.986512	nucleolar protein 14	7	-0.0218362	0.473703	-0.451867	124.143	-0.508158	0.172428	0.832765	0.00737711	-1.34092	2.23e-05
Smp_149640	1203.51	0.112421	0.144372	0.778692	0.436161	0.94213	tyrosine protein phosphatase non receptor type	7	-0.00693338	0.443577	-0.436643	118.88	-0.508203	0.48185	0.757975	0.239848	-1.26618	0.0331928
Smp_153860	733.448	0.178284	0.154871	1.15118	0.249659	0.796039	hypothetical protein	7	0.0786801	0.346505	-0.425185	89.7705	-0.508786	0.205074	0.518119	0.151444	-1.02691	0.00339982
Smp_000140	1342.89	-0.110016	0.124393	-0.884421	0.376469	0.907274	hypothetical protein	7	0.0477671	0.360943	-0.408711	164.709	-0.509463	0.0638801	0.585398	0.014547	-1.09486	6.98e-06
Smp_175230	639.394	0.137309	0.223224	0.615115	0.538479	0.98412	dihydrofolate reductase	7	-0.116813	0.821414	-0.704602	138.585	-0.510782	0.494974	1.44797	0.0143479	-1.95875	0.000800876
Smp_157800	552.907	-0.093072	0.207321	-0.448926	0.653485	0.999981	nucleolar rna helicase 2	7	-0.0516273	0.693242	-0.641614	223.037	-0.51131	0.374712	1.19028	0.0125487	-1.70159	0.000279057
Smp_179010	371.131	-0.0734271	0.170709	-0.43013	0.667101	0.999981	exosome complex component RRP42	7	-0.0856099	0.647771	-0.562161	282.67	-0.512408	0.279013	1.19293	0.00240551	-1.70534	1.22e-05
Smp_150610	336.564	-0.130817	0.162887	-0.803113	0.421909	0.93315	39S ribosomal protein L46, mitochondrial	7	0.0882416	0.309359	-0.397601	89.0126	-0.512437	0.387731	0.419345	0.47648	-0.931781	0.0713386
Smp_053160	610.575	0.0869131	0.122632	0.708732	0.478491	0.957	ubiquitin domain containing CTD phosphatase	7	0.0078355	0.375055	-0.382891	208.247	-0.5148	0.301825	0.671837	0.141736	-1.18664	0.00544911
Smp_125500	1410.64	-0.0719227	0.152071	-0.472954	0.636246	0.99887	prenylcysteine oxidase	7	-0.10949	0.641042	-0.531552	216.151	-0.516044	0.157068	1.19815	6.21e-05	-1.71419	1.89e-08
Smp_210520	1145.03	0.0525352	0.140199	0.37472	0.707869	0.999981	transcription factor Dp 1	7	-0.108836	0.693773	-0.584937	518.389	-0.519683	0.283303	1.2574	0.00204113	-1.77709	8.54e-06
Smp_089060	4321.01	0.220375	0.116631	1.8895	0.0588247	0.370488	Eukaryotic translation initiation factor 4H	7	-0.0150083	0.480421	-0.465413	773.951	-0.520378	0.0577084	0.846999	0.000594155	-1.36738	1.38e-08
Smp_168810	884.571	-0.024177	0.145363	-0.166322	0.867904	0.999981	GA binding protein transcription factor, alpha	7	-0.0635291	0.561031	-0.497502	129.007	-0.523333	0.457383	1.00079	0.0941267	-1.52412	0.00762597
Smp_089400	2699.77	-0.144868	0.118351	-1.22405	0.220933	0.76249	beta catenin protein 1 like	7	0.0378403	0.357464	-0.395304	641.251	-0.52391	0.261363	0.592678	0.185059	-1.11659	0.00598195
Smp_002190	828.304	-0.069337	0.184987	-0.37482	0.707794	0.999981	Cleavage and polyadenylation specificity factor	7	0.0487551	0.365209	-0.413964	180.913	-0.52437	0.261001	0.580527	0.181496	-1.1049	0.00638085
Smp_084900	859.773	-0.0466218	0.180951	-0.257648	0.796678	0.999981	translation initiation factor eIF 2B subunit	7	0.0723677	0.270246	-0.342614	400.549	-0.524813	0.382993	0.415288	0.506216	-0.940101	0.0741774
Smp_033660	1445.11	0.0317789	0.123316	0.257703	0.796636	0.999981	N acetylglucosamine 6 phosphate	7	-0.0651154	0.535404	-0.470289	282.534	-0.527922	0.267515	0.981262	0.0168915	-1.50918	0.000159157
Smp_033950	2698.04	0.177362	0.153979	1.15186	0.249381	0.795769	Smad4, putative	7	0.0634651	0.29496	-0.358425	508.268	-0.528927	0.194433	0.458005	0.260533	-0.986932	0.00643074
Smp_213360	135.483	-0.0158639	0.286547	-0.0553623	0.95585	0.999981	cytochrome C oxidase copper chaperone	7	0.0930931	0.344586	-0.437679	44.0938	-0.529593	0.483041	0.467843	0.519216	-0.997436	0.121291
Smp_122920	763.696	-0.050281	0.180417	-0.278693	0.78048	0.999981	POU domain, class 2, transcription factor	7	0.0823156	0.285692	-0.368008	271.545	-0.531871	0.0566777	0.424697	0.116769	-0.956569	0.000160562
Smp_157910	1666.47	-0.0826089	0.157628	-0.524074	0.600227	0.996125	hypothetical protein	7	-0.117062	0.669326	-0.552264	101.694	-0.531874	0.356387	1.19516	0.0115444	-1.72703	0.000243927
Smp_161960	1831.04	-0.00153791	0.14362	-0.0107082	0.991456	0.999981	hypothetical protein	7	0.133016	0.284731	-0.417747	263.307	-0.53477	0.150255	0.340674	0.380083	-0.875444	0.00926887
Smp_051010	390.681	0.0593632	0.189557	0.313169	0.754152	0.999981	ubiquitin conjugating enzyme E2 C	7	-0.0602227	0.514057	-0.453834	380.204	-0.537887	0.361952	0.952437	0.0666581	-1.49032	0.00247754
Smp_074620	327.014	0.0889085	0.20438	0.435017	0.66355	0.999981	hypothetical protein	7	0.0543385	0.348507	-0.402846	130.958	-0.541321	0.323484	0.575088	0.265854	-1.11641	0.0182559
Smp_069130	22194.6	0.0784896	0.11733	0.668965	0.503518	0.967361	heat shock protein 105 kDa	7	0.0324852	0.404181	-0.436666	4718.68	-0.544601	0.0139456	0.650472	0.00214466	-1.19507	2.84e-09
Smp_044020	198.676	-0.123434	0.215536	-0.572682	0.56686	0.987504	mitochondrial folate transporter:carrier	7	-0.00453439	0.436178	-0.431643	258.094	-0.546034	0.202254	0.75262	0.0505245	-1.29865	0.000430243
Smp_212940	898.902	0.00265333	0.184153	0.0144083	0.988504	0.999981	sideroflexin 1	7	-0.00988581	0.475909	-0.466023	337.111	-0.546814	0.156304	0.823805	0.0166004	-1.37062	3.79e-05
Smp_140760	1430.97	-0.00508231	0.134734	-0.0377209	0.96991	0.999981	hypothetical protein	7	0.143746	0.302086	-0.445832	226.376	-0.547624	0.274359	0.361638	0.496873	-0.909262	0.0419771
Smp_149000	420.838	-0.124979	0.16727	-0.74717	0.454961	0.949958	protein phosphatase 2C	7	-0.203658	0.765961	-0.562303	182.423	-0.547721	0.403859	1.46322	0.00601131	-2.01094	0.000126941
Smp_210340	1309.08	-0.00526411	0.162173	-0.0324599	0.974105	0.999981	sirtuin 6	7	0.0412631	0.383708	-0.424971	273.617	-0.548844	0.105608	0.59458	0.0587653	-1.14342	0.000141012
Smp_158650	254.714	-0.0823086	0.292235	-0.281652	0.77821	0.999981	hypothetical protein	7	0.0370235	0.479646	-0.51667	152.406	-0.550714	0.369946	0.763364	0.166939	-1.31408	0.0112623
Smp_022020	1990.25	0.00985739	0.163819	0.0601723	0.952018	0.999981	cpg binding protein	7	0.108876	0.271505	-0.380381	352.753	-0.552469	0.109536	0.375118	0.292774	-0.927586	0.00310752
Smp_032000	369.439	0.0165912	0.166341	0.0997419	0.920549	0.999981	caspase	7	0.0804138	0.385074	-0.465487	203.997	-0.5526	0.33815	0.561649	0.314891	-1.11425	0.0258813
Smp_180640	53.5999	0.0393681	0.392843	0.100213	0.920175	0.999981	oligomeric Golgi complex component	7	0.106123	0.302282	-0.408405	106.536	-0.555337	0.256633	0.393927	0.425957	-0.949265	0.0292929
Smp_066820	834.489	-0.0599365	0.138019	-0.434263	0.664098	0.999981	integrator complex subunit 6	7	-0.0105177	0.490026	-0.479508	443.137	-0.55537	0.20932	0.811808	0.0429532	-1.36718	0.000327797
Smp_132180	1122.98	-0.104787	0.125483	-0.835062	0.403683	0.92143	hypothetical protein	7	0.0879294	0.277059	-0.364989	81.6163	-0.555894	0.457383	0.404278	0.600183	-0.960172	0.139387
Smp_154270	516.5	-0.0893041	0.163431	-0.546434	0.584767	0.991299	3' phosphoadenosine 5' phosphosulfate synthase	7	0.102641	0.329056	-0.431697	151.642	-0.5575	0.223358	0.472618	0.291581	-1.03012	0.0109404
Smp_085640	2474.35	0.146046	0.137493	1.06221	0.288142	0.837161	cop9 signalosome complex subunit 4	7	0.135051	0.263433	-0.398484	573.073	-0.559425	0.130288	0.323869	0.419516	-0.883294	0.00882881
Smp_063040	1108.84	0.102016	0.174566	0.5844	0.558951	0.985603	actin 6a	7	-0.0390045	0.586514	-0.54751	468.307	-0.562722	0.312115	1.00172	0.0408153	-1.56444	0.000807731
Smp_084080	1790.52	-0.176532	0.153662	-1.14884	0.250623	0.797118	peptidyl prolyl cis trans isomerase CWC27	7	0.0593675	0.355075	-0.414442	220.63	-0.563351	0.0826215	0.565115	0.0606854	-1.12847	9.72e-05
Smp_084740	1428.39	-0.0340814	0.112012	-0.304266	0.760925	0.999981	ubiquitin carboxyl terminal hydrolase 14	7	0.1067	0.368928	-0.475628	387.491	-0.567045	0.138464	0.516017	0.16821	-1.08306	0.00150158
Smp_123420	2541.95	0.0288215	0.111894	0.257579	0.796732	0.999981	aryl hydrocarbon receptor nuclear translocator	7	0.0414272	0.400059	-0.441486	346.54	-0.567369	0.111376	0.634287	0.0581086	-1.20166	0.000140014
Smp_084380	1554.67	0.157402	0.109685	1.43503	0.151278	0.637517	Cleavage and polyadenylation specificity factor	7	-0.165568	0.773981	-0.608413	501.479	-0.569137	0.121218	1.45843	2.73e-06	-2.02757	6.18e-11
Smp_145880	199.064	0.0611957	0.203262	0.301069	0.763362	0.999981	abhydrolase domain containing protein 4	7	0.0861693	0.315694	-0.401864	114.953	-0.569941	0.18914	0.467694	0.257862	-1.03763	0.0070259
Smp_128070	236.258	0.205413	0.200637	1.0238	0.305929	0.852873	hypothetical protein	7	0.00988361	0.496628	-0.506511	141.462	-0.570763	0.0797029	0.836934	0.00240263	-1.4077	6.78e-07
Smp_159120	1428.33	0.0648505	0.127575	0.508334	0.611219	0.996858	family C48 unassigned peptidase (C48 family)	7	0.0457509	0.355817	-0.401567	253.757	-0.571125	0.182373	0.557533	0.176974	-1.12866	0.00286905
Smp_164440	1640.94	-0.0100058	0.103302	-0.0968604	0.922837	0.999981	hypothetical protein	7	0.0397868	0.363996	-0.403783	662.174	-0.575144	0.045601	0.58804	0.0328867	-1.16318	7.43e-06
Smp_150450	20.9406	-0.0179682	0.434704	-0.0413343	0.967029	0.999981	tubulin specific chaperone E	7	0.109841	0.369153	-0.478995	22.9917	-0.58237	0.383574	0.487904	0.405454	-1.07027	0.0626597
Smp_121810	703.701	0.0479189	0.139909	0.3425	0.731974	0.999981	protein shq1	7	0.0183372	0.431138	-0.449475	178.868	-0.582448	0.181913	0.709155	0.0744576	-1.2916	0.000670216
Smp_150440	612.78	0.0137382	0.119029	0.115419	0.908113	0.999981	tubulin specific chaperone E	7	0.0696402	0.312237	-0.381878	194.629	-0.585986	0.0995142	0.462068	0.183588	-1.04805	0.00109254
Smp_072330	91523.3	0.279306	0.130287	2.14378	0.0320502	0.244269	heat shock protein	7	-0.102349	0.710695	-0.608346	27250.5	-0.586322	0.159841	1.25595	0.000619468	-1.84227	2.01e-07
Smp_124820	4592.95	0.00432869	0.147018	0.0294434	0.976511	0.999981	chromosome region maintenance protein	7	0.0654182	0.34265	-0.408068	1221.72	-0.589101	0.0611111	0.523629	0.0947842	-1.11273	9.52e-05
Smp_105220	3391.87	0.306858	0.129054	2.37775	0.0174187	0.157299	hypothetical protein	7	-0.153446	0.809642	-0.656196	731.014	-0.589165	0.0189926	1.51356	4.34e-12	-2.10273	1.16e-21
Smp_165630	2866.19	0.0425997	0.129647	0.328582	0.742472	0.999981	hypothetical protein	7	0.0629509	0.363601	-0.426552	469.845	-0.589821	0.136762	0.560852	0.148186	-1.15067	0.00111872
Smp_147650	1081.64	0.146116	0.128225	1.13953	0.254482	0.803739	methylenetetrahydrofolate dehydrogenase	7	0.113618	0.324854	-0.438472	682.578	-0.590341	0.00562522	0.4397	0.037177	-1.03004	1.93e-07
Smp_083790	1358.32	0.00414475	0.127429	0.0325259	0.974053	0.999981	bromodomain containing protein 7	7	0.0121483	0.427429	-0.439577	266.404	-0.591234	0.169776	0.740846	0.0610238	-1.33208	0.000383809
Smp_141000	1338.6	0.0369391	0.159933	0.230966	0.817341	0.999981	interleukin enhancer binding factor 2	7	0.0586428	0.40318	-0.461823	554.815	-0.592342	0.00142117	0.634027	0.000211136	-1.22637	7.54e-13
Smp_090930	3366.66	0.263803	0.106747	2.47128	0.0134632	0.130931	hypothetical protein	7	-0.163226	0.816552	-0.653327	622.408	-0.592632	0.0496025	1.51433	5.52e-09	-2.10696	5.59e-16
Smp_000470	1149.32	-0.0642865	0.134957	-0.476347	0.633827	0.99872	carbohydrate kinase domain containing protein	7	0.0128365	0.479837	-0.492673	858.002	-0.593453	0.0145089	0.783134	0.000493857	-1.37659	3.21e-10
Smp_166550	1207.74	0.0618494	0.120743	0.512238	0.608484	0.996858	translation initiation factor eIF 2B subunit	7	0.080447	0.309021	-0.389468	621.379	-0.594636	0.172223	0.440836	0.327712	-1.03547	0.00808923
Smp_058780	1894.49	-0.118491	0.160895	-0.736445	0.46146	0.952792	leukocyte receptor cluster	7	0.0549901	0.34752	-0.40251	186.59	-0.594966	0.0895626	0.514906	0.124028	-1.10987	0.000427341
Smp_123770	883.852	-0.0281573	0.115439	-0.243916	0.807296	0.999981	protein SAAL1	7	0.058394	0.33529	-0.393684	262.515	-0.595075	0.0546614	0.525347	0.0753891	-1.12042	6.19e-05
Smp_153430	531.683	-0.0495999	0.143008	-0.346832	0.728718	0.999981	arginyl tRNA synthetase	7	0.122695	0.304043	-0.426738	55.6308	-0.595762	0.293282	0.396028	0.489949	-0.99179	0.0487046
Smp_149540	862.512	0.0887151	0.211675	0.419111	0.675135	0.999981	tata binding protein associated phosphoprotein	7	0.159764	0.260268	-0.420032	244.817	-0.596206	0.215826	0.283783	0.599523	-0.87999	0.0448033
Smp_103090	2478.65	-0.06492	0.12926	-0.502243	0.615497	0.996858	histone lysine N methyltransferase SETD2	7	0.127461	0.290961	-0.418422	559.418	-0.596428	0.0819885	0.348765	0.341567	-0.945192	0.00271639
Smp_134480	1055.21	-0.0293572	0.138163	-0.212483	0.83173	0.999981	hypothetical protein	7	-0.11709	0.673947	-0.556857	267.409	-0.598109	0.102218	1.24496	6.05e-05	-1.84307	3.65e-09
Smp_163340	518.522	0.194019	0.131144	1.47943	0.139025	0.611353	protein timeless	7	-0.132003	0.777742	-0.645739	185.116	-0.607318	0.347014	1.35713	0.0124309	-1.96445	0.000208815
Smp_140100	2595.27	0.0105248	0.150271	0.0700388	0.944163	0.999981	double stranded RNA binding protein zn72d	7	0.133814	0.309461	-0.443274	404.275	-0.608843	0.110651	0.378366	0.348547	-0.987208	0.00460873
Smp_138050	7262.29	0.0298258	0.0971271	0.30708	0.758783	0.999981	polypyrimidine tract binding protein	7	0.0371191	0.443403	-0.480522	1748	-0.609926	0.00976965	0.703284	0.00179816	-1.31321	1.05e-09
Smp_063390	804.38	-0.111483	0.196641	-0.566934	0.570759	0.989154	L aminoadipate semialdehyde	7	0.0189949	0.456283	-0.475278	225.853	-0.610768	0.236016	0.732913	0.125561	-1.34368	0.00267404
Smp_128960	1903.36	-0.00143433	0.143325	-0.0100075	0.992015	0.999981	transcription initiation factor TFIID subunit 2	7	0.174451	0.26651	-0.440961	257.37	-0.611874	0.0892998	0.269539	0.505219	-0.881413	0.00831883
Smp_169740	565.765	0.194163	0.144629	1.34249	0.179437	0.698152	bifunctional polynucleotide phosphatase:kinase	7	0.0458051	0.394462	-0.440267	143.298	-0.61253	0.15196	0.635103	0.110259	-1.24763	0.000925466
Smp_039640	2244.08	0.0727213	0.109845	0.662036	0.507948	0.970086	Retinoblastoma binding protein 6	7	0.0324649	0.450343	-0.482808	979.679	-0.612679	0.0799704	0.737825	0.0252544	-1.3505	1.39e-05
Smp_024800	256.252	-0.00560427	0.181123	-0.0309418	0.975316	0.999981	N6 adenine specific DNA methyltransferase 1	7	-0.0324673	0.681649	-0.649182	107.297	-0.612957	0.283504	1.13337	0.0171704	-1.74633	0.000243249
Smp_097110	331.541	-0.0875531	0.198397	-0.441301	0.658995	0.999981	bromodomain and PHD finger containing protein 1	7	0.058222	0.376107	-0.434329	21.139	-0.614105	0.563917	0.530004	0.609813	-1.14411	0.207424
Smp_213250	3289.22	0.02038	0.136298	0.149526	0.881139	0.999981	Bcl 2 ous antagonist:killer	7	0.094955	0.3469	-0.441855	413.265	-0.614404	0.2652	0.430747	0.461292	-1.04515	0.0336824
Smp_006700	2046.74	0.0846879	0.140861	0.601216	0.547696	0.985603	zinc finger protein 106	7	-0.158929	0.711453	-0.552524	277.561	-0.614943	0.347854	1.32846	0.0172171	-1.94341	0.000315912
Smp_145870	354.169	-0.0882997	0.179814	-0.491062	0.623382	0.996858	abhydrolase domain containing protein 4	7	0.108624	0.294242	-0.402866	64.8514	-0.616662	0.0934701	0.40002	0.225836	-1.01668	0.00220816
Smp_049930	962.447	0.0588576	0.149094	0.39477	0.693013	0.999981	protein FAM73B	7	0.0818781	0.352633	-0.434511	298.164	-0.616872	0.0535104	0.543101	0.0765956	-1.15997	5.95e-05
Smp_083680	1851.64	0.080204	0.193485	0.414524	0.67849	0.999981	hypothetical protein	7	-0.0646118	0.639337	-0.574726	454.626	-0.617217	0.0348781	1.1273	1.14e-05	-1.74452	1.14e-11
Smp_049880	4373.11	0.102776	0.120968	0.849617	0.395538	0.92078	nuclear pore glycoprotein p62	7	0.064796	0.483967	-0.548763	35.4303	-0.619257	0.504487	0.732927	0.387415	-1.35218	0.0804216
Smp_137970	965.018	-0.036661	0.133205	-0.275223	0.783145	0.999981	PHD finger protein	7	-0.201467	0.832399	-0.630932	311.391	-0.620228	0.196955	1.57439	8.68e-05	-2.19462	3.9e-08
Smp_023670	2728.71	0.0525258	0.158393	0.331618	0.740178	0.999981	partner dicer	7	0.116193	0.288807	-0.405	429.491	-0.620434	0.0572954	0.393501	0.247783	-1.01393	0.000730801
Smp_046600	1199.18	0.112535	0.322268	0.349196	0.726942	0.999981	actin	7	0.0646938	0.410576	-0.47527	7244.03	-0.622847	0.278254	0.621189	0.276684	-1.24404	0.0133207
Smp_076560	1046.61	0.0185352	0.123692	0.14985	0.880883	0.999981	cyclin t1	7	-0.0688241	0.568051	-0.499227	416.876	-0.623167	0.271811	1.01742	0.0435454	-1.64059	0.000640168
Smp_179270	6757.65	0.164385	0.152887	1.07521	0.282281	0.831419	heterogeneous nuclear ribonucleoprotein	7	0.0289062	0.436923	-0.465829	678.82	-0.623344	0.207541	0.705077	0.135113	-1.32842	0.00212719
Smp_078610	5766.26	-0.135871	0.162606	-0.835584	0.403389	0.92143	rna binding motif protein 25	7	0.130526	0.284128	-0.414654	1067.5	-0.623389	0.00763536	0.335702	0.177486	-0.959091	1.2e-05
Smp_151480	1443.97	-0.0818163	0.139808	-0.585205	0.55841	0.985603	hypothetical protein	7	0.0148621	0.391416	-0.406278	339.981	-0.624366	0.18203	0.642082	0.153342	-1.26645	0.00213628
Smp_128310	1233.18	-0.220498	0.126906	-1.73748	0.0823017	0.462147	xylosyltransferase I	7	0.00970343	0.405456	-0.415159	262.912	-0.625518	0.318189	0.658554	0.278458	-1.28407	0.0179177
Smp_164900	108.222	-0.29219	0.212502	-1.375	0.169132	0.677353	hypothetical protein	7	0.0721566	0.399307	-0.471464	25.8399	-0.626774	0.323484	0.587482	0.283279	-1.21426	0.0262375
Smp_071880	743.643	-0.263738	0.159278	-1.65584	0.097755	0.511858	SAGA associated factor 29	7	0.148675	0.2851	-0.433776	227.531	-0.627664	0.0862039	0.320472	0.419258	-0.948136	0.00498048
Smp_093100	3092.51	-0.152362	0.193974	-0.785473	0.432176	0.941245	splicing factor u2af 35 kda subunit	7	0.102837	0.360305	-0.463142	852.722	-0.629141	0.164964	0.498834	0.28223	-1.12797	0.00546182
Smp_004640	501.451	0.14469	0.140271	1.03151	0.302304	0.848979	DNA directed RNA polymerases I and III subunit	7	-0.0796688	0.664114	-0.584446	259.353	-0.629255	0.0310065	1.18152	1.8e-06	-1.81077	1.24e-12
Smp_174420	512.403	0.249148	0.14974	1.66387	0.0961387	0.506126	hypothetical protein	7	-0.09255	0.743089	-0.650539	146.596	-0.629798	0.161728	1.33162	0.000287327	-1.96141	2.02e-07
Smp_078900	1056.67	-0.0158801	0.142491	-0.111446	0.911262	0.999981	histone lysine N methyltransferase E(z)	7	0.0167285	0.355816	-0.372544	50.4614	-0.630059	0.396896	0.563211	0.432323	-1.19327	0.0630336
Smp_071640	5955.07	0.0403395	0.24094	0.167425	0.867036	0.999981	arginine:serine rich splicing factor	7	0.0582901	0.363374	-0.421664	1823.73	-0.630617	0.312	0.553426	0.383536	-1.18404	0.0305998
Smp_024380	963.84	0.0391817	0.183151	0.213931	0.830601	0.999981	hypothetical protein	7	-0.0862244	0.708017	-0.621793	165.769	-0.635677	0.0615863	1.26853	3.95e-06	-1.9042	6.4e-11
Smp_175860	384.525	0.712645	0.140397	5.07592	3.86e-07	1.75e-05	hypothetical protein	7	0.0830312	0.59518	-0.678211	33.1759	-0.636178	0.441866	0.862847	0.232526	-1.49903	0.0291508
Smp_071470	3599.54	-0.045495	0.140438	-0.323951	0.745975	0.999981	interferon regulatory factor 4	7	0.142549	0.276717	-0.419267	1330.5	-0.636531	0.160163	0.309946	0.55025	-0.946477	0.0227044
Smp_150910	187.939	-0.235285	0.168694	-1.39474	0.163094	0.6643	hypothetical protein	7	-0.0479943	0.648483	-0.600489	47.0786	-0.636814	0.230816	1.13634	0.00421121	-1.77316	5.21e-05
Smp_127700	90.4351	0.0859376	0.232919	0.368959	0.712158	0.999981	hypothetical protein	7	0.0686392	0.399336	-0.467975	118.489	-0.6409	0.230734	0.579773	0.260798	-1.22067	0.00946105
Smp_142770	2320.1	0.00307655	0.142015	0.0216635	0.982716	0.999981	transportin 1	7	0.0959029	0.368615	-0.464518	487.38	-0.641777	0.0159869	0.527402	0.0420815	-1.16918	1.76e-06
Smp_071950	1371.53	-0.0752596	0.123122	-0.611261	0.541027	0.98412	tetratricopeptide repeat protein 7B	7	0.103305	0.277791	-0.381096	308.643	-0.642102	0.142511	0.373144	0.429269	-1.01525	0.010866
Smp_159940	478.496	-0.083683	0.138622	-0.603677	0.546058	0.985603	hypothetical protein	7	0.054549	0.415785	-0.470334	119.832	-0.64264	0.0709314	0.654499	0.0409796	-1.29714	4.28e-05
Smp_073290	1968.44	-0.0609527	0.146029	-0.417401	0.676385	0.999981	serine:threonine protein phosphatase 4	7	-0.0773698	0.666199	-0.588829	895.376	-0.643608	0.0452746	1.19534	3.22e-05	-1.83895	7.06e-11
Smp_019190	2439.83	0.0548172	0.108154	0.506842	0.612266	0.996858	Pre mRNA splicing factor SLU7	7	-0.0777764	0.600773	-0.522997	486.362	-0.643932	0.110723	1.06956	0.00302183	-1.71349	9.83e-07
Smp_176600	1245.73	0.0638738	0.17282	0.369598	0.711682	0.999981	serine:threonine protein phosphatase 2A 56 kDa	7	0.0673533	0.341669	-0.409023	256.972	-0.644637	0.137752	0.524037	0.225555	-1.16867	0.00269619
Smp_212340	185.758	-0.141303	0.187737	-0.752664	0.451652	0.949389	hypothetical protein	7	-0.0138646	0.493963	-0.480098	103.614	-0.6463	0.207268	0.826149	0.0704025	-1.47245	0.000868551
Smp_015840	1303.09	0.00315074	0.145207	0.0216982	0.982689	0.999981	zinc finger and SCAN domain containing protein	7	-0.0642855	0.644076	-0.57979	505.03	-0.64656	0.00568782	1.14772	2.44e-08	-1.79428	9.86e-18
Smp_176490	315.097	0.137058	0.155768	0.879888	0.37892	0.908669	hypothetical protein	7	-0.233574	0.958301	-0.724727	282.988	-0.64777	0.262826	1.80337	0.00016476	-2.45114	2.38e-07
Smp_092780	3445.37	0.0595631	0.171241	0.347831	0.727967	0.999981	snRNA activating protein complex subunit 3	7	0.149668	0.301173	-0.450841	747.68	-0.64865	0.145212	0.337118	0.500084	-0.985769	0.0155467
Smp_023270	2706.13	0.0682565	0.101071	0.675332	0.499465	0.966165	RNA binding protein 40	7	0.0811341	0.353125	-0.434259	301.592	-0.649427	0.018951	0.515744	0.0527779	-1.16517	4.38e-06
Smp_046870	1725.3	0.243424	0.196142	1.24106	0.214584	0.751787	hypothetical protein	7	0.0312612	0.469041	-0.500302	713.566	-0.65267	0.28591	0.741616	0.206969	-1.39429	0.00855469
Smp_130220	414.54	0.143963	0.177476	0.81117	0.417268	0.928974	hypothetical protein	7	-0.00544917	0.671876	-0.666427	234.324	-0.652689	0.136194	1.11466	0.00346901	-1.76735	2.61e-06
Smp_123590	344.323	-0.0559051	0.232119	-0.240846	0.809674	0.999981	swi5 dependent recombination DNA repair protein	7	0.117933	0.351394	-0.469327	47.1258	-0.659964	0.18498	0.469892	0.31539	-1.12986	0.0108937
Smp_010100	1985.5	-0.0138668	0.120531	-0.115048	0.908407	0.999981	lipoic acid synthetase	7	0.0969229	0.640113	-0.737036	61.1427	-0.664604	0.384741	0.903577	0.184289	-1.56818	0.0148408
Smp_171890	1296.1	0.0234415	0.151736	0.154489	0.877224	0.999981	histidine protein methyltransferase 1	7	0.108056	0.311147	-0.419203	357.824	-0.665065	0.0649977	0.399918	0.29205	-1.06498	0.00133249
Smp_135510	964.934	0.0498365	0.12553	0.397009	0.691361	0.999981	n acetylated alpha linked acidic dipeptidase 2	7	0.106668	0.362234	-0.468902	223.08	-0.66869	0.0706332	0.48049	0.194117	-1.14918	0.000650311
Smp_211330	6747.44	-0.0182604	0.116052	-0.157347	0.874971	0.999981	ATP dependent RNA helicase DDX6	7	0.143468	0.219333	-0.362801	2491.38	-0.671075	0.134632	0.239877	0.657605	-0.910952	0.02885
Smp_114130	60.022	-0.93269	1.1123	-0.838521	0.401738	0.92143	hypothetical protein	7	0.0928731	0.355021	-0.447894	50.8117	-0.67152	0.415373	0.468462	0.579731	-1.13998	0.114008
Smp_180510	750.013	-0.36041	0.155225	-2.32185	0.0202409	0.17471	protein FAM46C	7	0.190295	0.216244	-0.406539	275.802	-0.673682	0.149423	0.199627	0.728432	-0.873309	0.0447979
Smp_040710	308.107	0.0659593	0.30145	0.218807	0.8268	0.999981	polymerase (RNA) II (DNA directed) polypeptide	7	0.0693052	0.455185	-0.52449	105.38	-0.674093	0.160573	0.671873	0.127385	-1.34597	0.00145316
Smp_061570	1089.05	0.207759	0.138782	1.49701	0.13439	0.601743	Mediator of RNA polymerase II transcription	7	-0.0056743	0.544103	-0.538429	222.195	-0.675178	0.0330988	0.899523	0.00141421	-1.5747	2.34e-08
Smp_044440	3003.55	-0.00140068	0.133037	-0.0105285	0.9916	0.999981	alcohol dehydrogenase class 3	7	0.17352	0.27735	-0.45087	428.216	-0.681093	0.262114	0.281786	0.692389	-0.96288	0.0834451
Smp_058620	1733.3	0.224161	0.140592	1.59441	0.110845	0.551467	serine:threonine protein kinase doa	7	0.00716317	0.501423	-0.508586	483.666	-0.681759	0.165943	0.82827	0.0715499	-1.51003	0.000451796
Smp_031920	2390.12	-0.217361	0.149955	-1.44951	0.147195	0.630198	hypothetical protein	7	0.166219	0.272183	-0.438402	1342.51	-0.682246	0.192855	0.283297	0.64522	-0.965542	0.044628
Smp_039670	2029.33	0.104909	0.131958	0.795015	0.426605	0.938225	Cyclin L1	7	-0.0250498	0.592653	-0.567603	865.642	-0.682255	0.040476	1.00032	0.00106964	-1.68257	1.26e-08
Smp_132590	1379.9	-0.01847	0.139596	-0.132311	0.894739	0.999981	CCAAT:enhancer binding protein (C:EBP), zeta	7	-0.0958245	0.700624	-0.6048	235.332	-0.682342	0.280978	1.2277	0.0264029	-1.91004	0.000332561
Smp_063110	4257.62	0.123194	0.129517	0.951174	0.341516	0.882031	Zinc finger MYM type protein 3	7	-0.06437	0.667408	-0.603038	1142.23	-0.683208	0.0231503	1.16907	1.94e-05	-1.85227	4.38e-12
Smp_028650	1526.17	0.0911998	0.142196	0.641367	0.521284	0.976144	hypothetical protein	7	0.129713	0.353321	-0.483034	144.164	-0.684587	0.349536	0.466479	0.550416	-1.15107	0.0761591
Smp_176760	266.697	0.122914	0.164598	0.746751	0.455214	0.950102	metaxin 1	7	-0.0772722	0.694783	-0.617511	262.215	-0.686621	0.109536	1.25171	0.000749997	-1.93833	1.49e-07
Smp_138640	749.192	-0.13904	0.147107	-0.945159	0.344577	0.884053	sirtuin 1	7	0.164426	0.231443	-0.395869	193.101	-0.688595	0.280978	0.248906	0.744037	-0.937502	0.109497
Smp_173910	641.137	0.182246	0.234852	0.776003	0.437747	0.943772	nudC domain containing protein 2	7	0.181545	0.234665	-0.41621	167.777	-0.6897	0.17068	0.221446	0.713011	-0.911145	0.0505476
Smp_006320	7704.55	0.0574148	0.122234	0.469714	0.638559	0.999328	KH domain containing, RNA binding, signal	7	0.0405915	0.493483	-0.534075	2221.14	-0.692975	0.184412	0.763649	0.130662	-1.45662	0.00151582
Smp_006590	406.132	0.105354	0.15562	0.676996	0.498409	0.965738	zinc finger HIT domain containing protein 2	7	0.0749614	0.450098	-0.525059	140.528	-0.699033	0.0679618	0.698678	0.0477122	-1.39771	4.48e-05
Smp_176430	383.935	0.372001	0.133951	2.77715	0.00548376	0.0633654	pleckstrin y domain containing family G	7	0.0652273	0.448922	-0.514149	57.4008	-0.69927	0.580957	0.631744	0.624603	-1.33101	0.219923
Smp_105330	1355.79	-0.204674	0.114552	-1.78674	0.0739789	0.432356	DCN1 protein 1	7	0.137	0.247971	-0.384972	448.938	-0.699322	0.110951	0.305836	0.546306	-1.00516	0.0133216
Smp_084540	2870	-0.0204776	0.10765	-0.190224	0.849133	0.999981	angiogenic factor with G patch and FHA domains	7	0.12226	0.361673	-0.483933	596.051	-0.699537	0.0293351	0.453905	0.173634	-1.15344	0.00010093
Smp_174210	3210.84	0.0311217	0.1135	0.274198	0.783932	0.999981	ATP dependent RNA helicase DDX46	7	0.115149	0.384096	-0.499245	526.18	-0.7017	0.00341735	0.505222	0.0330885	-1.20692	6.52e-08
Smp_085110	6570.71	-0.317718	0.115651	-2.74721	0.00601049	0.0676648	dihydropyrimidinase (M38 family)	7	0.178271	0.264907	-0.443179	1807.96	-0.701898	0.099274	0.243087	0.63843	-0.944985	0.01749
Smp_104630	1072.69	0.0673615	0.172672	0.390113	0.696453	0.999981	tRNA (guanine N(7)) methyltransferase subunit	7	0.0389573	0.45448	-0.493437	413.861	-0.702187	0.131288	0.701268	0.119039	-1.40346	0.000683314
Smp_126690	997.457	-0.00780031	0.173961	-0.0448394	0.964235	0.999981	COP9 signalosome complex subunit 6	7	0.119465	0.278237	-0.397702	308.314	-0.702302	0.151003	0.355389	0.516251	-1.05769	0.0180139
Smp_129950	10475.3	0.233299	0.133061	1.75332	0.0795465	0.45303	RNA binding protein 12	7	0.00433129	0.578837	-0.583168	1924.77	-0.70423	0.163812	0.929208	0.0495455	-1.63344	0.000213018
Smp_126720	2218.77	-0.0403564	0.132189	-0.305293	0.760143	0.999981	pre mRNA splicing factor ISY1	7	0.150934	0.314631	-0.465566	450.443	-0.707152	0.0277519	0.364129	0.29398	-1.07128	0.000353402
Smp_021960	703.278	0.104702	0.132733	0.788818	0.430219	0.940541	importin 13	7	-0.0546572	0.646317	-0.59166	92.0736	-0.710317	0.255273	1.11987	0.0388386	-1.83019	0.000541179
Smp_129140	297.123	0.0659439	0.160501	0.410863	0.681173	0.999981	methyltransferase METT10D	7	0.0668737	0.489954	-0.556828	79.0403	-0.71087	0.0854534	0.718293	0.0488944	-1.42916	9.53e-05
Smp_202400	92.0528	0.598339	0.256214	2.33531	0.0195272	0.170432	hypothetical protein	7	0.0043444	0.611696	-0.61604	22.3119	-0.711163	0.325779	0.948857	0.0976675	-1.66002	0.00608353
Smp_000680	658.765	0.0788242	0.189683	0.415557	0.677735	0.999981	mitochondrial ornithine transporter 1	7	0.0597769	0.40311	-0.462887	168.016	-0.711715	0.250982	0.580839	0.35175	-1.29255	0.0184878
Smp_064830	2294.92	-0.139136	0.155697	-0.893635	0.371517	0.902994	Survival of motor neuron splicing factor	7	0.118879	0.385838	-0.504716	1396.37	-0.712636	0.116206	0.502994	0.291078	-1.21563	0.0031803
Smp_146570	905.633	0.0102122	0.135861	0.0751665	0.940082	0.999981	hypothetical protein	7	0.114524	0.390093	-0.504617	195.225	-0.71314	0.0987064	0.523947	0.227516	-1.23709	0.00156134
Smp_050740	1443.9	-0.210882	0.148347	-1.42155	0.155156	0.647426	general transcription factor 3C polypeptide 5	7	0.187463	0.244168	-0.43163	631.967	-0.721758	0.0345937	0.217719	0.601032	-0.939478	0.00369638
Smp_060900	1357.54	-0.00957596	0.136968	-0.069914	0.944262	0.999981	U4:U6 small nuclear ribonucleoprotein Prp3	7	0.0678878	0.39765	-0.465538	505.768	-0.726568	0.0878177	0.595089	0.163592	-1.32166	0.000597672
Smp_006710	1683.37	-0.0566326	0.151124	-0.374742	0.707852	0.999981	endonuclease III protein 1 like	7	0.117819	0.533167	-0.650986	349.935	-0.726803	0.188704	0.689986	0.204141	-1.41679	0.00378327
Smp_153130	537.213	0.0018052	0.152575	0.0118315	0.99056	0.999981	hypothetical protein	7	0.171511	0.350269	-0.52178	64.5272	-0.727193	0.124086	0.360633	0.460222	-1.08783	0.0119154
Smp_093310	3828.73	0.163692	0.191022	0.856924	0.391487	0.916977	transcription factor E2F5	7	0.111302	0.370737	-0.48204	399.038	-0.729008	0.0203081	0.510764	0.106217	-1.23977	1.86e-05
Smp_068270	7135.19	0.0418668	0.114711	0.364975	0.71513	0.999981	heat shock transcription factor	7	0.115342	0.335583	-0.450925	741.143	-0.732027	0.0120834	0.427894	0.165343	-1.15992	2.06e-05
Smp_003770	44657.9	-0.00479646	0.173863	-0.0275876	0.977991	0.999981	histone H1	7	-0.0745378	0.774433	-0.699895	3683.2	-0.732896	0.0180793	1.36871	1.39e-06	-2.1016	2.66e-14
Smp_064870	4678.85	0.0709778	0.110047	0.644979	0.518941	0.975212	Dynein intermediate chain	7	0.192034	0.259888	-0.451922	483.594	-0.732933	0.00104481	0.23499	0.356339	-0.967922	6.32e-06
Smp_072360	796.897	0.0159361	0.114881	0.138718	0.889673	0.999981	splicing factor, arginine:serine rich 17A	7	0.138993	0.232898	-0.371891	198.357	-0.73534	0.342848	0.223428	0.814982	-0.958768	0.179525
Smp_172270	2253.38	-0.029206	0.139631	-0.209166	0.834319	0.999981	CCR4 NOT transcription complex subunit 6	7	0.185629	0.222166	-0.407795	354.548	-0.742698	0.0442306	0.182541	0.694557	-0.925239	0.00834758
Smp_159110	3137.21	-0.0030065	0.100005	-0.0300635	0.976016	0.999981	spindle assembly abnormal protein 6	7	0.200832	0.217129	-0.417961	359.77	-0.744338	0.0118829	0.157541	0.675866	-0.901879	0.0015103
Smp_142260	70.9858	0.101903	0.360355	0.282785	0.777342	0.999981	hypothetical protein	7	0.106472	0.420343	-0.526816	19.2197	-0.74536	0.352536	0.551704	0.46645	-1.29706	0.0645053
Smp_176150	704.819	-0.0443855	0.158058	-0.280818	0.77885	0.999981	DNA cross link repair 1A protein	7	0.170414	0.323016	-0.49343	320.376	-0.749057	0.00505955	0.356441	0.205804	-1.1055	1.11e-05
Smp_160530	1472.63	0.042481	0.12548	0.338547	0.734951	0.999981	hypothetical protein	7	-0.0228384	0.621791	-0.598952	326.383	-0.750118	0.0453506	1.05966	0.00169201	-1.80978	5.04e-08
Smp_140950	3662.99	-0.172189	0.19894	-0.865528	0.386749	0.915763	mortality factor 4 protein 1 like	7	0.181553	0.297018	-0.478572	394.588	-0.750367	0.00478762	0.300711	0.305719	-1.05108	3.02e-05
Smp_136360	359.026	-0.232574	0.180906	-1.28561	0.198579	0.732443	DNA cross link repair 1A protein	7	0.184167	0.230543	-0.414711	155.332	-0.751174	0.0356954	0.1844	0.671578	-0.935574	0.00596517
Smp_179690	962.083	0.0953875	0.15724	0.606637	0.544092	0.985603	hypothetical protein	7	-0.0467572	0.64242	-0.595663	242.27	-0.752989	0.257542	1.0824	0.0739153	-1.83539	0.00127542
Smp_129330	868.576	-0.000620377	0.168917	-0.00367269	0.99707	0.999981	beta ketothiolase	7	0.135156	0.264504	-0.39966	77.6035	-0.753093	0.300316	0.3136	0.707115	-1.06669	0.107117
Smp_144090	1314.09	0.167652	0.143871	1.16529	0.2439	0.791943	hyperparathyroidism	7	0.178302	0.303001	-0.481303	251.896	-0.753651	0.163465	0.290019	0.646722	-1.04367	0.0363902
Smp_187960	1662.17	-0.0888057	0.108062	-0.821805	0.411188	0.923757	hypothetical protein	7	0.200007	0.252806	-0.452813	101.501	-0.754366	0.143922	0.159155	0.807522	-0.913521	0.0597553
Smp_022090	2318.78	0.115253	0.133228	0.865086	0.386991	0.915763	ribose phosphate pyrophosphokinase 1	7	0.175811	0.276853	-0.452664	666.898	-0.754563	0.0244615	0.277285	0.480803	-1.03185	0.00112629
Smp_081620	688.452	-0.0511042	0.126545	-0.403841	0.68633	0.999981	hox protein Dfd	7	0.105228	0.484037	-0.589265	43.907	-0.755834	0.420935	0.634292	0.501843	-1.39013	0.0876075
Smp_041490	360.002	-0.113306	0.183512	-0.617429	0.536952	0.98342	Alkylated DNA repair protein alkB 1	7	0.0778529	0.429792	-0.507644	144.603	-0.755884	0.132401	0.615878	0.211268	-1.37176	0.00230208
Smp_099170	518.635	0.155046	0.183254	0.846067	0.397515	0.921176	DNA directed RNA polymerase II subunit RPB3	7	0.0575044	0.435205	-0.492709	168.66	-0.756408	0.132895	0.676156	0.162922	-1.43256	0.00140581
Smp_115340	183.856	0.120168	0.248988	0.482626	0.629362	0.997803	n alpha acetyltransferase 40, NatD catalytic	7	0.0268924	0.652503	-0.679396	107.814	-0.757372	0.0970048	1.03399	0.00832766	-1.79136	6.56e-06
Smp_142760	212.051	0.617504	0.172146	3.58709	0.000334389	0.00629047	centrosomal protein of 95 kDa	7	0.138166	0.396068	-0.534234	85.7136	-0.759155	0.110183	0.494996	0.297499	-1.25415	0.00361857
Smp_009710	2702.28	-0.0335495	0.135305	-0.247954	0.80417	0.999981	general transcription factor 3C polypeptide 3	7	-0.0077268	0.658051	-0.650325	509.888	-0.75932	0.0022415	1.0712	2.14e-06	-1.83051	6.28e-16
Smp_004080	2194.39	0.0340779	0.191666	0.177798	0.858882	0.999981	mitochondrial 2 oxoglutarate:malate carrier	7	0.028742	0.500929	-0.529671	249.486	-0.759704	0.0839036	0.802771	0.0526106	-1.56248	6.65e-05
Smp_120640	2488.86	0.107027	0.133421	0.802172	0.422453	0.933393	hypothetical protein	7	0.1051	0.420012	-0.525112	918.929	-0.761973	0.0472939	0.568227	0.148448	-1.3302	0.000155211
Smp_127080	560.705	0.0651	0.140209	0.464308	0.642427	0.999981	hypothetical protein	7	0.100906	0.41685	-0.517756	66.2962	-0.763012	0.300619	0.57275	0.444676	-1.33576	0.0401521
Smp_166070	2706.26	0.0378901	0.119106	0.31812	0.750394	0.999981	ras specific guanine nucleotide releasing factor	7	0.0908597	0.501917	-0.592776	376.118	-0.765308	0.0391815	0.723815	0.0429606	-1.48912	9.48e-06
Smp_055340	1893.12	0.190478	0.131603	1.44737	0.147794	0.630214	protein lin 9	7	0.0594527	0.491768	-0.551221	610.556	-0.768017	0.00465248	0.731942	0.00505308	-1.49996	1.94e-09
Smp_043970	3903.16	-0.100242	0.149951	-0.668495	0.503817	0.967361	hypothetical protein	7	0.14667	0.337507	-0.484177	283.932	-0.769083	0.00508782	0.395612	0.163439	-1.16469	6.25e-06
Smp_017360	6006.9	0.256235	0.153717	1.66693	0.0955285	0.50539	T complex protein 1 subunit alpha	7	0.0880887	0.464992	-0.553081	2255.56	-0.770354	0.014344	0.664669	0.0342574	-1.43502	7.09e-07
Smp_036500	1922.95	-0.0196539	0.121482	-0.161785	0.871475	0.999981	constitutive androstane receptor (CAR)	7	0.160435	0.268336	-0.428772	401.485	-0.771067	0.0268662	0.298988	0.455163	-1.07006	0.00111975
Smp_164410	1615.47	-0.0557783	0.160861	-0.346748	0.728781	0.999981	transportin 3	7	0.16858	0.294886	-0.463466	496.256	-0.771897	0.0167261	0.32752	0.36328	-1.09942	0.000296637
Smp_213570	945.872	-0.084981	0.145732	-0.583133	0.559804	0.985603	similar to THO complex, putative	7	0.200357	0.271524	-0.471881	151.351	-0.773407	0.0829738	0.262009	0.613873	-1.03542	0.0131299
Smp_095470	1073.6	0.0397426	0.132737	0.299409	0.764628	0.999981	mps one binder kinase activator 2B like	7	0.144525	0.285442	-0.429967	362.967	-0.775823	0.0486747	0.32755	0.463213	-1.10337	0.0027132
Smp_100380	113.307	0.211305	0.284996	0.741431	0.458432	0.95055	dna replication complex gins protein psf2	7	-0.136871	1.01405	-0.877182	132.688	-0.775968	0.167122	1.7836	9.6e-05	-2.55956	4.67e-08
Smp_011980	1751.26	0.00957072	0.114653	0.0834758	0.933473	0.999981	general transcription factor iih subunit 1	7	0.101294	0.344784	-0.446078	310.725	-0.777665	0.0603206	0.472028	0.279171	-1.24969	0.00105146
Smp_174840	554.187	0.121214	0.26308	0.460751	0.644977	0.999981	chromobox protein	7	0.0327228	0.655609	-0.688331	155.814	-0.779043	0.0784915	1.02597	0.00860897	-1.80501	3.49e-06
Smp_208090	3012.55	0.0528452	0.14485	0.364827	0.71524	0.999981	hypothetical protein	7	0.139961	0.335968	-0.475929	379.066	-0.781609	0.0329279	0.397925	0.317886	-1.17953	0.000556708
Smp_153140	412.663	0.663988	0.154066	4.30976	1.63e-05	0.000465234	dynein heavy chain	7	0.156764	0.345078	-0.501842	74.0076	-0.782162	0.0538408	0.38132	0.360387	-1.16348	0.00194786
Smp_049000	1461.66	-0.185981	0.168702	-1.10242	0.270279	0.817676	SURP and G patch domain containing protein 1	7	0.213256	0.306184	-0.519439	358.712	-0.782263	0.0103431	0.256195	0.472354	-1.03846	0.000344375
Smp_091810	2820.09	-0.0385634	0.115229	-0.334666	0.737877	0.999981	#N/A	7	-0.0484392	0.668473	-0.620034	600.02	-0.782667	0.0156987	1.15541	9.15e-05	-1.93808	2.5e-11
Smp_094760	2656.04	-0.0161122	0.122169	-0.131884	0.895076	0.999981	cyclin dependent kinase 9	7	0.179909	0.258358	-0.438267	522.525	-0.783356	0.0351858	0.241445	0.59318	-1.0248	0.00363202
Smp_176660	307.994	0.0196956	0.143043	0.137691	0.890485	0.999981	hypothetical protein	7	0.0228987	0.575629	-0.598528	160.559	-0.788633	0.0345111	0.938089	0.00428187	-1.72672	2.1e-07
Smp_045810	1260.89	0.222837	0.153371	1.45293	0.146244	0.628317	delta aminolevulinic acid dehydratase	7	0.14598	0.282999	-0.428979	301.803	-0.789572	0.137832	0.31974	0.603322	-1.10931	0.0241247
Smp_143390	711.255	-0.157882	0.131746	-1.19838	0.230768	0.777701	cytohesin 1	7	0.0649264	0.515701	-0.580628	242.882	-0.789947	0.0377725	0.786533	0.0279701	-1.57648	4.46e-06
Smp_076590	2213.81	0.189224	0.253593	0.746174	0.455562	0.950503	hypothetical protein	7	0.175644	0.296417	-0.472061	439.012	-0.791022	0.0705284	0.312042	0.542462	-1.10306	0.00697277
Smp_213090	149.278	-0.195529	0.204699	-0.955203	0.339475	0.879586	conserved hypothetical protein	7	0.0846542	0.406125	-0.490779	20.7479	-0.791404	0.333713	0.555716	0.484274	-1.34712	0.0610513
Smp_138220	2364.91	-0.0591812	0.163306	-0.362394	0.717058	0.999981	hypothetical protein	7	0.06276	0.40557	-0.46833	318.505	-0.792723	0.152202	0.59407	0.297499	-1.38679	0.00538305
Smp_084520	254.526	-0.0287856	0.158231	-0.181921	0.855645	0.999981	protein sensitivity to red light reduced	7	0.181181	0.253618	-0.434798	234.207	-0.794024	0.0616534	0.245243	0.631956	-1.03927	0.00942823
Smp_150850	1176.63	-0.121876	0.129589	-0.940482	0.34697	0.886233	histone lysine n methyltransferase setb1	7	0.231625	0.282391	-0.514015	78.6315	-0.796019	0.195316	0.193292	0.801019	-0.989311	0.0848603
Smp_095130	551.85	0.029893	0.139238	0.214691	0.830009	0.999981	porphobilinogen deaminase	7	0.102784	0.422166	-0.524951	254.502	-0.797259	0.12898	0.60912	0.25063	-1.40638	0.0029579
Smp_167590	1580.67	-0.175328	0.152977	-1.14611	0.251751	0.799731	activating signal cointegrator 1	7	0.168047	0.227327	-0.395374	193.823	-0.798219	0.0552684	0.213771	0.675871	-1.01199	0.0102054
Smp_167240	1255.07	0.0617234	0.127916	0.482532	0.629428	0.997803	Nicastrin	7	0.0982283	0.436414	-0.534642	300.747	-0.798885	0.0038558	0.60016	0.0240469	-1.39905	4.91e-08
Smp_019130	565.069	-0.0514278	0.154757	-0.332313	0.739653	0.999981	polyribonucleotide 5' hydroxyl kinase Clp1	7	-0.00453343	0.679156	-0.674623	220.778	-0.801918	0.054687	1.10347	0.00302183	-1.90539	2.38e-07
Smp_038080	3276.45	0.0801205	0.134533	0.595546	0.551478	0.985603	importin subunit beta 1	7	-0.0859065	0.795573	-0.709667	799.772	-0.804989	0.000770466	1.38917	1.69e-10	-2.19416	1.02e-23
Smp_051420	908.354	-0.091037	0.169539	-0.536969	0.591289	0.99375	eri1 exoribonuclease 2	7	-0.042188	0.759458	-0.71727	195.805	-0.805322	0.0039629	1.25534	7.46e-08	-2.06066	1.61e-16
Smp_035480	1544.32	-0.0813104	0.130636	-0.622421	0.533665	0.981345	hypothetical protein	7	0.195738	0.232644	-0.428382	649.059	-0.806127	0.0529705	0.178682	0.742022	-0.984809	0.0129336
Smp_181340	1338.3	0.400647	0.113935	3.51647	0.000437333	0.00788207	ATP:GTP binding protein 5	7	0.16386	0.296151	-0.460011	720.559	-0.808786	0.00426522	0.326787	0.305684	-1.13557	2.33e-05
Smp_160550	299.693	-0.196665	0.17618	-1.11627	0.264305	0.8137	Dyp type peroxidase	7	0.157516	0.398611	-0.556126	130.54	-0.809785	0.062305	0.492552	0.260798	-1.30234	0.00109488
Smp_156780	586.787	0.122009	0.203036	0.600924	0.547891	0.985603	ribosome biogenesis protein brix	7	0.194529	0.228903	-0.423432	132.715	-0.810023	0.0200037	0.1671	0.698781	-0.977123	0.00337098
Smp_003660	5860.44	-0.074481	0.130833	-0.569285	0.569163	0.988013	spliceosome RNA helicase DDX39B	7	0.149655	0.375867	-0.525522	3725.3	-0.810864	0.0759291	0.454589	0.365431	-1.26545	0.00269934
Smp_085750	228.512	0.116973	0.243379	0.48062	0.630787	0.997803	hypothetical protein	7	0.150157	0.381031	-0.531188	82.7713	-0.81527	0.0654825	0.448567	0.307729	-1.26384	0.00189085
Smp_030760	767.354	-0.0762363	0.122499	-0.622343	0.533716	0.981345	cytochrome p450 reductase	7	0.26976	0.200811	-0.470572	292.255	-0.815426	0.0272725	0.0255662	0.966594	-0.840992	0.019454
Smp_137060	1057.1	-0.0615092	0.16355	-0.376087	0.706852	0.999981	histone lysine N methyltransferase	7	-0.0281017	0.59143	-0.563328	42.3036	-0.816392	0.390077	0.947609	0.283987	-1.764	0.0290694
Smp_074070	1961.36	-0.0260388	0.102874	-0.253114	0.80018	0.999981	DNA repair protein XRCC1	7	0.0766968	0.446753	-0.523449	291.853	-0.819351	0.0540969	0.621537	0.146466	-1.44089	0.000205803
Smp_097250	225.121	0.112716	0.237073	0.475448	0.634468	0.998794	Exosome complex exonuclease RRP4	7	0.201639	0.290013	-0.491652	61.4825	-0.820582	0.147126	0.252785	0.693876	-1.07337	0.0409548
Smp_073490	1704.03	-0.0724166	0.268614	-0.269593	0.787473	0.999981	dual specificity mitogen activated protein	7	0.0302617	0.664122	-0.694384	73.652	-0.821444	0.0783329	1.02423	0.00790181	-1.84568	5.93e-06
Smp_078310	2611.06	0.262426	0.154335	1.70036	0.0890626	0.484899	ran binding protein	7	-0.0754156	0.780655	-0.70524	573.559	-0.824843	0.00281168	1.36068	4.72e-08	-2.18552	2.28e-18
Smp_213060	679.357	0.195422	0.175173	1.1156	0.264595	0.8137	polycomb group RING finger protein 2	7	-0.0717579	0.839834	-0.768076	249.455	-0.830255	0.0489136	1.45536	7.95e-05	-2.28562	5.64e-10
Smp_171540	7009.64	0.0282381	0.132881	0.212507	0.831712	0.999981	Ribosome binding protein 1	7	0.157307	0.393506	-0.550813	757.5	-0.831253	0.110932	0.438097	0.451011	-1.26935	0.00812411
Smp_035460	225.822	0.0767675	0.162196	0.473301	0.635998	0.998794	nicotinate phosphoribosyltransferase	7	0.185971	0.280878	-0.466849	118.969	-0.831537	0.108923	0.227623	0.718804	-1.05916	0.0294177
Smp_133880	413.971	-0.370856	0.170339	-2.17717	0.0294679	0.231194	cd109 antigen	7	0.127162	0.319154	-0.446317	35.3171	-0.831907	0.338101	0.374211	0.699853	-1.20612	0.124693
Smp_153610	392.248	0.171225	0.148482	1.15317	0.248841	0.795769	chromatin assembly factor 1 subunit b	7	0.0131531	0.72761	-0.740763	28.4891	-0.835247	0.281622	1.11157	0.080698	-1.94682	0.00299108
Smp_038540	951.395	0.08342	0.122062	0.683424	0.494339	0.963446	hypothetical protein	7	0.104457	0.375743	-0.4802	280.018	-0.837012	0.151145	0.503109	0.422368	-1.34012	0.0113752
Smp_148280	703.4	0.124878	0.205976	0.606275	0.544332	0.985603	hypothetical protein	7	0.0393413	0.563067	-0.602408	180.592	-0.837206	0.00963156	0.875354	0.00254369	-1.71256	5.29e-09
Smp_005640	219.598	0.0264734	0.172116	0.153811	0.877759	0.999981	PAP:25A associated domain containing protein	7	0.195202	0.215919	-0.411121	99.4077	-0.837677	0.255578	0.159512	0.868314	-0.997189	0.148277
Smp_145120	834.7	0.170947	0.131689	1.29811	0.19425	0.726706	double C2 domains, beta	7	0.108711	0.32586	-0.434571	234.815	-0.838414	0.181496	0.44207	0.52877	-1.28048	0.0252199
Smp_211130	597.696	-0.0541713	0.151814	-0.356826	0.721222	0.999981	hypothetical protein	7	0.00142057	0.788254	-0.789674	98.9567	-0.83956	0.114023	1.21286	0.00782678	-2.05242	8.28e-06
Smp_174130	315.585	-0.00328984	0.159617	-0.0206109	0.983556	0.999981	mitochondrial inner membrane protein cox18	7	0.156591	0.390253	-0.546844	294.117	-0.842169	0.0450079	0.441381	0.328715	-1.28355	0.00100033
Smp_080180	1187.45	0.0256932	0.137914	0.186299	0.852211	0.999981	Ras association (RalGDS:AF 6) domain family	7	0.192899	0.258116	-0.451016	297.803	-0.842395	0.0107152	0.215402	0.595441	-1.0578	0.00081074
Smp_143960	529.712	0.139637	0.146814	0.951113	0.341547	0.882031	hypothetical protein	7	0.036729	0.582018	-0.618747	156.387	-0.847195	0.227323	0.847597	0.21294	-1.69479	0.00595327
Smp_129520	5267.3	-0.107446	0.11329	-0.948415	0.342918	0.882656	hypothetical protein	7	0.278517	0.178089	-0.456606	318.879	-0.8476	0.0284553	-0.00416871	0.998572	-0.843432	0.0260269
Smp_095670	3655.83	0.0758228	0.151016	0.502083	0.615609	0.996858	Zinc finger CCCH domain containing protein 3	7	0.0262443	0.592521	-0.618765	1726.59	-0.851239	0.0208959	0.91439	0.0101812	-1.76563	1.35e-07
Smp_163300	2116.61	0.0722681	0.134546	0.537125	0.591181	0.99375	scavenger mRNA decapping enzyme DcpS	7	0.220983	0.306656	-0.527639	958.07	-0.853103	0.00122991	0.250171	0.429401	-1.10327	1.37e-05
Smp_082660	1557.05	0.112332	0.128599	0.87351	0.382385	0.912396	E3 ubiquitin protein ligase TRIM33	7	0.154927	0.506863	-0.66179	527.326	-0.854164	0.0328384	0.639223	0.115042	-1.49339	4.79e-05
Smp_118780	555.125	-0.0182049	0.143461	-0.126898	0.899021	0.999981	2 aminoethanethiol dioxygenase	7	0.133517	0.454872	-0.588388	233.997	-0.855782	0.01137	0.576059	0.0870306	-1.43184	4.95e-06
Smp_152440	1545.79	-0.00749971	0.129964	-0.0577062	0.953983	0.999981	hypothetical protein	7	0.119571	0.386652	-0.506223	200.278	-0.858052	0.105607	0.502497	0.374003	-1.36055	0.00504061
Smp_142170	2450.94	-0.020931	0.18649	-0.112237	0.910636	0.999981	set1:ash2 histone methyltransferase complex	7	0.184361	0.281704	-0.466065	570.865	-0.858601	0.0215499	0.264098	0.559415	-1.1227	0.00154084
Smp_148700	1035.19	0.00771357	0.213326	0.0361587	0.971156	0.999981	leukocyte receptor cluster	7	0.0919399	0.510138	-0.602078	89.08	-0.860074	0.028421	0.713322	0.0433687	-1.5734	9.85e-06
Smp_068220	9323.07	0.146149	0.131329	1.11284	0.265775	0.8137	helix loop helix zipper protein	7	0.18014	0.352695	-0.532836	1092.72	-0.862931	0.0311375	0.377726	0.40869	-1.24066	0.000968037
Smp_011150	415.04	0.101938	0.140786	0.724061	0.469028	0.954322	threonine aspartase 1	7	0.158655	0.412509	-0.571164	199.653	-0.865037	0.122948	0.499943	0.405032	-1.36498	0.0077016
Smp_187940	559.932	-0.122898	0.124918	-0.983831	0.325199	0.868607	sphingosine kinase 1	7	0.128389	0.417674	-0.546063	36.9668	-0.865972	0.0782201	0.521761	0.232827	-1.38773	0.00185282
Smp_083450	979.831	0.0454222	0.233398	0.194613	0.845696	0.999981	dnaj subfamily c	7	0.108145	0.494501	-0.602646	314.851	-0.866673	0.0267008	0.654288	0.094275	-1.52096	2.28e-05
Smp_001180	3680.95	0.0313664	0.16414	0.191096	0.84845	0.999981	steroid receptor interacting snf2 domain	7	0.247649	0.172745	-0.420394	244.39	-0.869213	0.287745	0.0323158	0.980644	-0.901528	0.247955
Smp_091470	2462.86	-0.0625485	0.122411	-0.51097	0.609372	0.996858	puromycin sensitive aminopeptidase	7	0.189077	0.308603	-0.49768	637.702	-0.871965	0.00131691	0.296252	0.343817	-1.16822	7.03e-06
Smp_029240	8499.84	0.293559	0.201603	1.45613	0.145357	0.626348	protein arginine N methyltransferase 1	7	0.0309566	0.631391	-0.662347	1807.95	-0.872824	0.0489687	0.976147	0.0218457	-1.84897	3.49e-06
Smp_002160	757.2	0.00301273	0.120396	0.0250235	0.980036	0.999981	dna methyltransferase 1 associated protein 1	7	0.0657707	0.571081	-0.636852	209.867	-0.873191	0.00767053	0.852843	0.00454702	-1.72603	7.49e-09
Smp_066670	1324.29	0.0816626	0.1154	0.707651	0.479162	0.957	syntaxin 1a	7	0.148954	0.40838	-0.557334	79.9366	-0.873401	0.0458063	0.504056	0.243928	-1.37746	0.0006201
Smp_213850	671.348	0.139674	0.13393	1.04289	0.296998	0.843484	hypothetical protein	7	0.0101406	0.668715	-0.678856	399.251	-0.873767	0.000485745	1.0736	2.25e-06	-1.94737	2.86e-17
Smp_072090	807.354	-0.0957615	0.141973	-0.674507	0.499989	0.966193	(ACP) S malonyltransferase	7	0.220845	0.214974	-0.435819	224.915	-0.878031	0.0248594	0.120144	0.821615	-0.998176	0.00812604
Smp_074210	683.146	-0.128149	0.127963	-1.00145	0.316608	0.862173	hypothetical protein	7	0.261084	0.192625	-0.45371	155.51	-0.878863	0.0222356	0.0370351	0.948987	-0.915898	0.0144164
Smp_138920	1499.13	-0.00558141	0.150702	-0.0370361	0.970456	0.999981	COP9 signalosome complex subunit	7	0.130292	0.345526	-0.475818	568.454	-0.880056	0.02401	0.414753	0.337933	-1.29481	0.000394672
Smp_164820	1024.48	-0.0825519	0.13261	-0.622515	0.533603	0.981345	hypothetical protein	7	0.076507	0.497332	-0.573839	589.819	-0.881413	0.00103313	0.718409	0.00625371	-1.59982	1.77e-10
Smp_148050	867.204	-6.36e-05	0.114979	-0.000553321	0.999559	0.999981	glutaminyl tRNA synthetase	7	0.162079	0.3598	-0.521879	247.632	-0.882345	0.0505397	0.400272	0.423965	-1.28262	0.00229241
Smp_180020	369.34	0.300547	0.190687	1.57612	0.114997	0.561512	centromere protein j	7	0.221346	0.701874	-0.92322	45.9644	-0.883195	0.452232	0.752972	0.528499	-1.63617	0.105697
Smp_158110	5891.33	-0.148649	0.265314	-0.560277	0.575291	0.990953	thioredoxin peroxidase	7	0.243658	0.218018	-0.461676	2872.67	-0.886897	0.0883243	0.108032	0.884159	-0.994929	0.0454907
Smp_067940	49.8751	0.165161	0.298792	0.552761	0.580427	0.990999	hypothetical protein	7	0.224005	0.248747	-0.472752	76.4487	-0.890743	0.113153	0.192217	0.784163	-1.08296	0.0408703
Smp_012720	6730.78	0.0948311	0.129665	0.731357	0.464561	0.952792	hypothetical protein	7	0.204484	0.230382	-0.434866	451.994	-0.891716	0.0157665	0.160615	0.744037	-1.05233	0.00306877
Smp_054640	210.469	-0.106771	0.18023	-0.592415	0.553573	0.985603	major facilitator superfamily domain containing protein	7	0.00430841	0.772276	-0.776584	95.1555	-0.893405	0.052392	1.20694	0.0018594	-2.10034	2.05e-07
Smp_168500	459.325	-0.0954845	0.129634	-0.736571	0.461383	0.952792	hypoxanthine guanine phosphoribosyltransferase	7	0.0805743	0.553432	-0.634007	189.404	-0.90532	0.00802014	0.806004	0.0108987	-1.71132	4.5e-08
Smp_090450	3471.69	0.0531895	0.194739	0.273132	0.784752	0.999981	Host cell factor (dHcf) (Contains: HCF	7	0.179162	0.295022	-0.474183	682.058	-0.905642	0.0366433	0.323076	0.534755	-1.22872	0.0026676
Smp_196270	773.509	0.0328321	0.133164	0.246554	0.805253	0.999981	lysine specific demethylase 7	7	-0.0152114	0.733045	-0.717834	26.3273	-0.906696	0.221736	1.13186	0.0591431	-2.03856	0.00126184
Smp_092880	6353.55	0.105885	0.158414	0.668405	0.503875	0.967361	single stranded DNA binding protein 3	7	0.165808	0.344696	-0.510505	1432.36	-0.908795	0.0425252	0.360556	0.493898	-1.26935	0.00254443
Smp_003940	345.673	-0.00247939	0.15913	-0.015581	0.987569	0.999981	methyltransferase C20orf7	7	0.245931	0.228343	-0.474274	154.316	-0.91241	0.00463219	0.120359	0.777627	-1.03277	0.000947929
Smp_020090	233.357	0.0612193	0.167969	0.364468	0.715508	0.999981	stem cell tumor	7	-0.0336921	0.801498	-0.767805	128.321	-0.912449	0.0143301	1.35141	1.55e-05	-2.26385	7.23e-12
Smp_142690	1477.45	0.114434	0.136219	0.840072	0.400868	0.92143	neuronal acetylcholine receptor subunit alpha 4	7	0.295729	0.166127	-0.461856	339.213	-0.913371	0.0245589	-0.045634	0.940555	-0.867737	0.0300393
Smp_018430	743.006	-0.230112	0.14256	-1.61414	0.106497	0.536666	mitochondrial inner membrane protease subunit 1	7	0.256733	0.359402	-0.616135	270.008	-0.915942	0.0775894	0.286432	0.647988	-1.20237	0.013633
Smp_212390	586.58	-0.164517	0.224318	-0.73341	0.463308	0.952792	ubiquitin specific peptidase 2 (C19 family)	7	0.234899	0.453194	-0.688093	36.7878	-0.91761	0.272311	0.459539	0.613546	-1.37715	0.0684478
Smp_142950	1701.4	0.057976	0.142343	0.407298	0.683789	0.999981	DNA directed RNA polymerase III subunit	7	0.131049	0.328533	-0.459582	246.256	-0.918882	0.210289	0.383908	0.653769	-1.30279	0.0524992
Smp_172660	1670.37	0.0694933	0.165938	0.418792	0.675368	0.999981	diphosphomevalonate decarboxylase	7	0.269584	0.291422	-0.561006	780.554	-0.921631	0.0829539	0.16862	0.813696	-1.09025	0.0310572
Smp_173640	521.71	0.169479	0.161948	1.0465	0.295328	0.841969	regulator of microtubule dynamics protein	7	0.220639	0.239006	-0.459644	148.686	-0.923349	0.0666201	0.17835	0.785511	-1.1017	0.0215733
Smp_044850	1344.32	0.0408488	0.176057	0.23202	0.816523	0.999981	ribokinase	7	0.0646375	0.61289	-0.677527	400.373	-0.927332	0.123748	0.862662	0.146506	-1.78999	0.000887428
Smp_164990	3819.92	0.0408369	0.112457	0.363135	0.716504	0.999981	protein FAM76A	7	0.245242	0.211674	-0.456916	744.835	-0.928176	0.00347767	0.0791123	0.867438	-1.00729	0.0011619
Smp_006930	4370.86	-0.0604865	0.0974157	-0.620911	0.534658	0.9816	beta 1 3 galactosyltransferase brn	7	0.154767	0.375611	-0.530378	764.699	-0.931917	0.00109436	0.438543	0.155858	-1.37046	4.39e-07
Smp_003330	323.513	0.436177	0.227182	1.91995	0.0548648	0.355979	sjogren syndrome nuclear autoantigen	7	0.284683	0.303813	-0.588496	249.095	-0.932729	0.0549392	0.181019	0.777069	-1.11375	0.0161209
Smp_012030	4352.32	0.157037	0.175603	0.894273	0.371176	0.902649	zinc finger protein 407	7	0.282752	0.145852	-0.428604	461.339	-0.939685	0.0661736	-0.0536436	0.944135	-0.886042	0.0776723
Smp_147630	849.706	-0.149467	0.115074	-1.29887	0.193988	0.726621	poly(ADP ribose) glycohydrolase ARH3	7	0.216821	0.260554	-0.477375	132.657	-0.940998	0.0153132	0.174817	0.720646	-1.11581	0.00275988
Smp_012540	2733.03	0.0838372	0.164434	0.509855	0.610153	0.996858	rRNA processing protein UTP23	7	0.147987	0.374345	-0.522333	482.926	-0.941067	0.00377941	0.439889	0.212816	-1.38096	6.97e-06
Smp_205540	261.118	1.29073	0.216326	5.9666	2.42e-09	1.83e-07	hypothetical protein	7	-0.0172882	0.736376	-0.719088	159.839	-0.94502	0.0409999	1.18969	0.00405102	-2.13471	2.11e-07
Smp_098370	1580.31	0.15239	0.133244	1.14369	0.252751	0.800628	uncharacterized aarF domain containing protein	7	0.353609	0.154044	-0.507653	422.518	-0.945176	0.028435	-0.154595	0.793547	-0.790582	0.0671521
Smp_105960	765.843	0.0288188	0.145774	0.197695	0.843284	0.999981	dnaj subfamily c	7	0.0256264	0.691589	-0.717215	283.125	-0.946616	0.0115613	1.05736	0.00229874	-2.00398	3.85e-09
Smp_136810	830.482	0.0545693	0.131304	0.415596	0.677705	0.999981	proteolipid protein	7	0.107227	0.517936	-0.625163	326.302	-0.947251	0.00405028	0.697269	0.0302482	-1.64452	7.84e-08
Smp_006680	1291.12	-0.0309147	0.112308	-0.275267	0.783111	0.999981	Programmed cell death protein 10	7	0.219056	0.247241	-0.466297	143.288	-0.951506	0.0261671	0.182728	0.739359	-1.13423	0.00567203
Smp_008830	5169.76	0.183906	0.118627	1.55029	0.121071	0.575422	SWI:SNF related, matrix associated, actin	7	0.0241384	0.754346	-0.778484	683.912	-0.95164	0.00121209	1.18812	1.68e-05	-2.13976	2.75e-15
Smp_070340	1209.09	0.136941	0.179062	0.764769	0.444409	0.947241	protein arginine n methyltransferase	7	0.255715	0.212442	-0.468157	364.497	-0.952926	0.00827701	0.0828131	0.874992	-1.03574	0.00318849
Smp_213610	3014.78	-0.0153577	0.182163	-0.0843076	0.932812	0.999981	hypothetical protein	7	0.218223	0.249752	-0.467975	61.6156	-0.954113	0.131447	0.137239	0.870965	-1.09135	0.0690275
Smp_123490	875.098	-0.10381	0.128087	-0.810468	0.417671	0.928974	nicotinamide mononucleotide adenylyltransferase	7	0.0463383	0.641821	-0.688159	164.307	-0.956111	0.0085392	0.989621	0.00271889	-1.94573	3.97e-09
Smp_198450	1528.05	-0.148216	0.168792	-0.8781	0.37989	0.909978	ATPase family AAA domain containing protein 1	7	0.2238	0.333529	-0.557329	144.235	-0.95703	0.00106458	0.296003	0.344568	-1.25303	7.49e-06
Smp_166000	499.029	-0.0798141	0.14165	-0.563461	0.573121	0.989965	hypothetical protein	7	0.00988252	0.756061	-0.765944	106.618	-0.965394	0.0223034	1.20227	0.000850352	-2.16766	8.08e-09
Smp_171650	807.195	-0.201375	0.131836	-1.52747	0.126644	0.588764	#N/A	7	0.132151	0.483013	-0.615164	113.803	-0.972013	0.128335	0.616467	0.354372	-1.58848	0.0062256
Smp_166580	1002.18	-0.0241704	0.127478	-0.189605	0.849618	0.999981	NADPH:adrenodoxin oxidoreductase, mitochondrial	7	0.176408	0.390132	-0.566539	275.024	-0.972955	0.00146707	0.420213	0.196679	-1.39317	1.65e-06
Smp_141380	608.409	0.0293803	0.143917	0.204147	0.838239	0.999981	serine:threonine protein kinase VRK1	7	-0.0237646	0.785806	-0.762042	181.974	-0.973007	0.0176147	1.26526	0.000541028	-2.23826	1.11e-09
Smp_051530	2817.48	0.0730351	0.119409	0.611639	0.540777	0.98412	heterogeneous nuclear ribonucleoprotein l	7	0.209541	0.335274	-0.544814	591.855	-0.974153	0.00861124	0.330969	0.448609	-1.30512	0.000215162
Smp_213680	1274.44	0.0210194	0.14099	0.149085	0.881486	0.999981	replication factor c subunit 1	7	0.234389	0.292076	-0.526465	346.312	-0.97426	0.00188823	0.207971	0.598502	-1.18223	9.47e-05
Smp_146830	1658.33	-0.433145	0.208579	-2.07664	0.0378344	0.276583	solute carrier family 16 protein	7	0.109631	0.460923	-0.570554	101.443	-0.978979	0.0426846	0.606985	0.207896	-1.58596	0.000353851
Smp_073220	1319.38	0.132662	0.125748	1.05498	0.291434	0.839923	hypothetical protein	7	0.23908	0.344644	-0.583724	291.145	-0.980242	0.0304567	0.26563	0.637488	-1.24587	0.0038367
Smp_064050	3562.43	0.131438	0.139354	0.9432	0.345578	0.884734	ruvb reptin and pontin	7	0.237944	0.36942	-0.607363	455.491	-0.980301	0.0465468	0.311035	0.602144	-1.29134	0.00548508
Smp_125590	868.03	-0.00938126	0.127618	-0.0735107	0.9414	0.999981	XK protein 6	7	0.306666	0.227427	-0.534093	124.797	-0.982135	0.00267593	0.018881	0.97231	-1.00102	0.0018649
Smp_147370	376.52	-0.220666	0.137616	-1.60349	0.108826	0.544258	PQ loop repeat containing protein 1	7	0.273195	0.288568	-0.561762	173.77	-0.985084	0.0146856	0.172964	0.740753	-1.15805	0.00286662
Smp_198940	237.649	-0.0964597	0.218712	-0.441036	0.659187	0.999981	O sialoglycoprotein endopeptidase	7	0.237531	0.249584	-0.487115	128.782	-0.98784	0.110183	0.142399	0.865369	-1.13024	0.0543826
Smp_137800	183.355	0.204219	0.181554	1.12484	0.260656	0.812495	ATPase family AAA domain containing protein 5	7	-0.0992437	0.873932	-0.774688	77.7412	-0.98908	0.232345	1.42165	0.0520749	-2.41073	0.000667946
Smp_038430	205.342	-0.0569998	0.210686	-0.270544	0.786742	0.999981	hypothetical protein	7	0.258211	0.205059	-0.46327	126.971	-0.989295	0.0370417	0.0454651	0.948538	-1.03476	0.024878
Smp_158380	1533.66	-0.0105851	0.130947	-0.0808347	0.935573	0.999981	mitochondrial import inner membrane translocase	7	0.254629	0.243382	-0.498011	355.507	-0.992042	0.000105968	0.113576	0.744878	-1.10562	1.01e-05
Smp_147150	2981.95	0.0432438	0.160978	0.268631	0.788214	0.999981	heterogeneous nuclear ribonucleoprotein C	7	0.260205	0.191234	-0.451439	260.31	-0.994836	0.0494876	0.0421618	0.956978	-1.037	0.0345971
Smp_065580	7633.62	0.0601118	0.105178	0.571523	0.567645	0.987504	heterogeneous nuclear ribonucleoprotein	7	0.30379	0.209005	-0.512795	1832.1	-0.998484	0.043243	-0.0103807	0.993284	-0.988103	0.0404026
Smp_104600	1173.54	0.0379739	0.122874	0.309047	0.757286	0.999981	hypothetical protein	7	0.113652	0.532902	-0.646554	353.28	-1.00517	0.00145178	0.730742	0.0182016	-1.73591	4.03e-09
Smp_009150	1057.28	-0.0326806	0.138367	-0.236187	0.813288	0.999981	3 oxoacyl (acyl carrier protein) synthase	7	0.368804	0.162292	-0.531096	241.921	-1.00599	0.0359339	-0.176294	0.783466	-0.829691	0.0846837
Smp_045750	1623.36	0.0601092	0.112999	0.531944	0.594765	0.994265	cak assembly factor	7	0.0854817	0.605425	-0.690907	219.198	-1.00607	0.00233792	0.87354	0.0047872	-1.87961	7.84e-10
Smp_030020	1185.45	0.170334	0.142468	1.19559	0.231855	0.779529	hypothetical protein	7	0.239674	0.338888	-0.578562	147.989	-1.00785	0.00133676	0.275485	0.434239	-1.28334	2.06e-05
Smp_121800	1891.71	0.0396318	0.122845	0.322615	0.746987	0.999981	replication protein A 70 kDa DNA binding	7	-0.100852	0.982342	-0.881491	664.227	-1.00804	0.000436613	1.69766	8.45e-11	-2.70571	7.29e-25
Smp_124020	806.324	-0.0517973	0.1411	-0.367097	0.713547	0.999981	heparan sulfate 6 O sulfotransferase 1	7	0.317637	0.290894	-0.608531	281.124	-1.00981	0.0105777	0.0821223	0.887651	-1.09193	0.00452544
Smp_166080	3269.68	-0.0434849	0.17407	-0.249812	0.802732	0.999981	striatin	7	0.226119	0.298268	-0.524388	996.307	-1.01041	0.00341226	0.237051	0.588956	-1.24746	0.000172538
Smp_172210	196.904	0.389839	0.162288	2.40215	0.016299	0.15132	leucine rich repeat and coiled coil	7	0.186515	0.523449	-0.709964	71.7172	-1.01281	0.19282	0.547847	0.517782	-1.56065	0.026953
Smp_176960	403.405	-0.0181707	0.16613	-0.109377	0.912904	0.999981	hypothetical protein	7	0.224113	0.373008	-0.59712	245.538	-1.0152	0.00327988	0.334544	0.392575	-1.34974	4.12e-05
[truncated: 6,598 more rows]
