# Supplementary material for: Flatworm-specific transcriptional regulators promote the specification of tegumental progenitors in Schistosoma mansoni
Source: eLife. 2018 Mar 20;7:e33221. doi: 10.7554/eLife.33221 (PMC5927768; doi:10.7554/eLife.33221)
Supplement: Supplementary file 5. [file elife-33221-supp5.xlsx]

## Sheet: qPCR
Insert	Name	Abbreviation	Forward	Reverse
Smp_181530	putative tetraspanin	tsp-2	ATCTAAGCAAAGCGCACCTC	CCGCGCTTTATAGCCAATAG
Smp_195190	13 kDa tegumental antigen Sm13	sm13	CTGTTCCCGTAAGCCGTAAT	GGCAACCAAAGCATTAAACG
Smp_049580	putative zinc finger protein	zfp-1-1	TTTGTAATCAATGCCGTCGT	TCAATGAATGTCGTTGCAGA
Smp_145470	putative zinc finger protein	zfp-1	CCTAATTCTGAACCGAATACACC	CGTCCAGTTTGACCAATATTTG
Sma_Cytochrome C oxidase I	Sma_Cytochrome C oxidase I	CytC	GTGGGAGTCTTTGGTTGTTG	CCACCCACAACTTAGAAGCA
Smp_056500	proteasome subunit beta type 4	Prot	TGGCTATCGTAAATAAAGAAGGAA	TCAGCAATAGACCAATCACATTT

## Sheet: ISH_RNAi
Insert	Name	Abbreviation	Forward	Reverse	note
Smp_148080	hypothetical protein	Smp_148080	TGTCCACCTGCATTTAGATATGGCAGG	ACACGCCAGAACCAGAACCCA
Smp_127710	hypothetical protein	Smp_127710	TGGGGGAACATGTGTTGGTACATCG	ACCATCATACATACAACGTCGTCCAGG
Smp_166890	ATPase, putative	ATPase	AGCTGGTCAGTTGTAGTCCGCT	TGCCAGTTGGAGTGCGTTCTGA
Smp_181530	putative tetraspanin	tsp-2	ATGGCTCTTGGTTGTGGGTA	CCGCGCTTTATAGCCAATAG
Smp_195180	antigenic integral membrane glycoprotein	sm25	GGATCGTTTGGAAACTATTCATT	TCAATGTAATCACAATACAACTACTCA
Smp_195190	13 kDa tegumental antigen Sm13	sm13	TTGTATTGTTTATGTTTGTTGAATTG	CATATACTTGACAACAATCCATTATGA
Smp_122630	MEG-1 family	meg1	tggctaacagggatttgatattg	ggacattctttttcgggtttt
Smp_049580	putative zinc finger protein	zfp-1-1	CCCAACAAATACAGTCAAACCA	AGCAGTGGTATTTGTCGATCCT
Smp_135530	leishmanolysin-2 (M08 family)	lmln2	cactatagaagtgaccttCCAAAATTGGAGGTTCGGTA	cactaaagggagaccttAGTGGGTGGGTGGATTTGTA
Smp_072190	putative sm29	sm29	cactatagaagtgaccttTGGCTGGGAGTATATTGGAA	cactaaagggagaccttTGATTCCTATGCAAACAAACAGA
Smp_210790	putative z-protein (S1r protein)	z-protein	TCAGCCAAGAATCTGGACATCCCA	AAGCACCACCGGCTGCCATA
Smp_099690	putative rer1 protein	rer1	AGGGAGGGGTTTCCAAACGTGT	TGAAACAGCACGGACGGTGGA
Smp_150380	sphingomyelin synthetase-related	sgms1	GTTGGGGGTTTATTGCAGCAGAAGT	CGGTACAACTGATCGCACATCATGT
Smp_198970	85 kD calcium-independent phospholipase A2 (Ipla2), putative	pla2	TGGTACCTCAACTGGTGCAGCG	GTCGGTGCAGCGCTTGAAGC
Smp_003230	endophilin B1	endophilin b1-1	cactatagaagtgaccttCGATTTTCGCAGATTGTTGA	cactaaagggagaccttACGTAATGCCGATTCTACCG
Smp_141010	Fer-1-related	dysferlin	tgcaacagttgaagtacctatttg	agcagctgaatcaaagaaattg
Smp_037230	fimbrin, putative	fimbrin	TTGATTCAACCCTTCGATCC	CACAACATCCAATGGAAGCA
Smp_140330	Epsin 4/enthoprotin, putative	epsin4	AGACCAACCCCCGCCTAGGT	CCATTTGCGCTGGCTGTTGC
Smp_077720	putative annexin	annexin b2	TAGCGCTGAAAATGATGCAG	CGTAAATCCATCAATGCCATAA
Smp_105410	Glucose transport protein	gtp-4	ATCTCTTCGTGGTGGAATCG	CTGTTCGAGCTGTTGTTGGA
Smp_153390	Nucleotide pyrophosphatase/phosphodiesterase 5	npp-5	GGATTGGAAGTGAGGCGATA	GCAGGTTCCAAATCAAGCAT
Smp_214190	Calpain	calp	TGAACAAGGAGCACTTGGTG	CCATCTGCAGTGAAGCTCAA
Smp_166340	CD59-like	CD59-like	TGGCACAAATCCTGCTAGTG	TTTGATTAATTGCTCGAATCTG
Smp_190970	Stard10 protein, putative	pctp	CGAGGTCGGGAGAATAGCTTCTGA	ACCTTATGAAATACAGAGTGGCAGGCA
Smp_156960	nardilysin (m16 family)	nrdc	TCAAATCCAGTTGCTGTGCT	CCATTCCCGTTGAAATTTGT
Smp_140510	tmem56	tmem56	CATCTGCGAGTGCCGGTTGC	CGAAGCAGTGCGAAACCCCG
Smp_194050	clumping factor A	clfA	TCGACAACAGTGGCTGGCGT	GCTGTTTCCGTGACTGTTTTTGCT
Smp_176300	dynein heavy chain	dhc	AAGCCGATGAACAGGCTAAA	TTCTCGCCAGCTAAACCACT
Smp_011830	hypothetical protein	Smp_011830	TGGCCAGCAGTCTGCCTGAA	TGATCTCGATTCAACTGCCTCCCT
Smp_165520	C6orf152	C6orf152	TGCCACAAATTGTTGATCGT	TCGACATTTTGGGATGATGA
Smp_046630	hypothetical protein	Smp_046630	TGGAATGAATTCTATGCATGTG	TTGGCAATACAAAAACAAATCAA
Smp_051920	nanos2	nanos2	cactaaagggagaccttCTAAAGTTGCCTGGGATAC	cactatagaagtgaccttATGCTGGACTTCCGTAGG
Smp_179320	ago2-1	ago2-1	cactaaagggagaccttACACATGGTAATGGGCAG	cactatagaagtgaccttAACTCAGCAAGTCCGCAAG
Smp_132510	Putative breast cancer type 1 susceptibility protein brca1	brca1	AGG CTG AAG ACC CAG GAG AT	GAA ATG GGA TCA CGG ACA TT
Smp_105360	notch	notch	TTG GGG GAG AAA TCA GTT TG	TGG TGC ACA TAT TTC CTT CG
Smp_157300	tyrosine kinase	fgfr1/4	GAG AAA CAG GAG GCC GAA AT	CCC GTA AGG AGC ATA TTC CA
Smp_076600	sox transcription factor	sox	GAT GTC CCC GCT ATC AGA AA	GCC GAT TGC CTT AGT GAG AA
Smp_026400	Thyrotroph embryonic factor related	tef	TAC GCA AGT TGG AGG CTT TC	GGA GAA AAA TCT GGC AAA GG
Smp_137090	Putative brca1 associated ring domain	bard	ACA TGC ACG TGA TTT CCA AG	ATT CGG TGA TAA CCC AGC AG
Smp_024860	Basic helix-loop-helix transcription factor,hes-related	hes1	GGT GGT GGT GAC ATG TTT GA	CGG AAA GAA AAC GAC GTG AT
Smp_145470	putative zinc finger protein	zfp-1	AAACGTCCAGTTTGACCAAT	TCAATCAACGAGTCCATTATTATCA	for RNAi
Smp_145470	putative zinc finger protein	zfp-1	TCATCAACAACCGGTCATGG	CAGGGAAAACGACGATTGGT	for ISH
Smp_089240	Putative beta-1,2-n-acetylglucosaminyltransferase II	mgat2	TAGCGCTGTTGCACAAATTC	CCAGGAAAGGTGTCTGGAAA
Smp_139530	Cellular tumor antigen P53, putative	p53	TTA GGA CAT GCG CAA CTA CG	CAC GAT CTG GAA AAC GGA AA
Smp_163720	endophilin B1	endophilin b1-2	AGGGCTCTGCAGAAAACAAA	AAGTTCGTTGAGCTGCGACT
Smp_176940.1	Putative cationic amino acid transporter	caat	TCT CCA TAC TGG CCA CAA TTC	CAT GTG CAG AAG AAG CCA AA
Smp_103610	Cathepsin B-like peptidase (C01 family)	ctsb	TCATTCCAGAAGAAATGG	TCATCACGACCACGCACTAT
