# Supplementary material for: Flatworm-specific transcriptional regulators promote the specification of tegumental progenitors in Schistosoma mansoni
Source: eLife. 2018 Mar 20;7:e33221. doi: 10.7554/eLife.33221 (PMC5927768; doi:10.7554/eLife.33221)
Supplement: Supplementary file 6. [file elife-33221-supp6.xlsx]

## Sheet: down-regulated
Cluster Number	Total number of genes in cluster	Total number of genes in cluster analysis (7155) minus column B	Number of Genes down regulated follwing zfp-1-1(RNAi) (log2 -0.5 , padj <0.05) from cluster	Genes with cluster information amoung down-regulated genes (110) minus column D	odds ratio	95% CI lower value	95% CI upper	p-value
1	355	6800	0	110	0	0	0.656846	0.006484
2	224	6931	7	103	2.10254	0.815282	4.56141	0.08837
3	48	7107	30	80	55.236	32.111	94.4529	2.2e-16
4	430	6725	5	105	0.744753	0.23566	1.80785	0.6853
5	185	6970	30	80	14.1101	8.72616	22.3553	2.2e-16
6	262	6893	2	108	0.487235	0.0579561	1.82124	0.4411
7	834	6321	1	109	0.0695435	0.00174655	0.396888	3.179e-05
8	328	6827	8	102	1.63232	0.680407	3.3782	0.1698
9	886	6269	3	107	0.198406	0.0401972	0.597753	0.0006407
10	680	6475	2	108	0.176356	0.0210437	0.655347	0.002601
11	559	6596	0	110	0	0	0.40387	0.0002187
12	1427	5728	1	109	0.036832	0.000927668	0.209962	1.39e-09
13	75	7080	6	104	5.44313	1.89346	12.8095	0.001358
14	32	7123	12	98	27.2094	12.3747	56.2074	1.11e-12
15	830	6325	3	107	0.213684	0.0432883	0.643927	0.001377
