# Supplementary figures and images for: Flatworm-specific transcriptional regulators promote the specification of tegumental progenitors in Schistosoma mansoni
Source: eLife journal article supplement (doi:10.7554/elife.33221), 2018-03-20

Figure 1-Figure Supplement 1

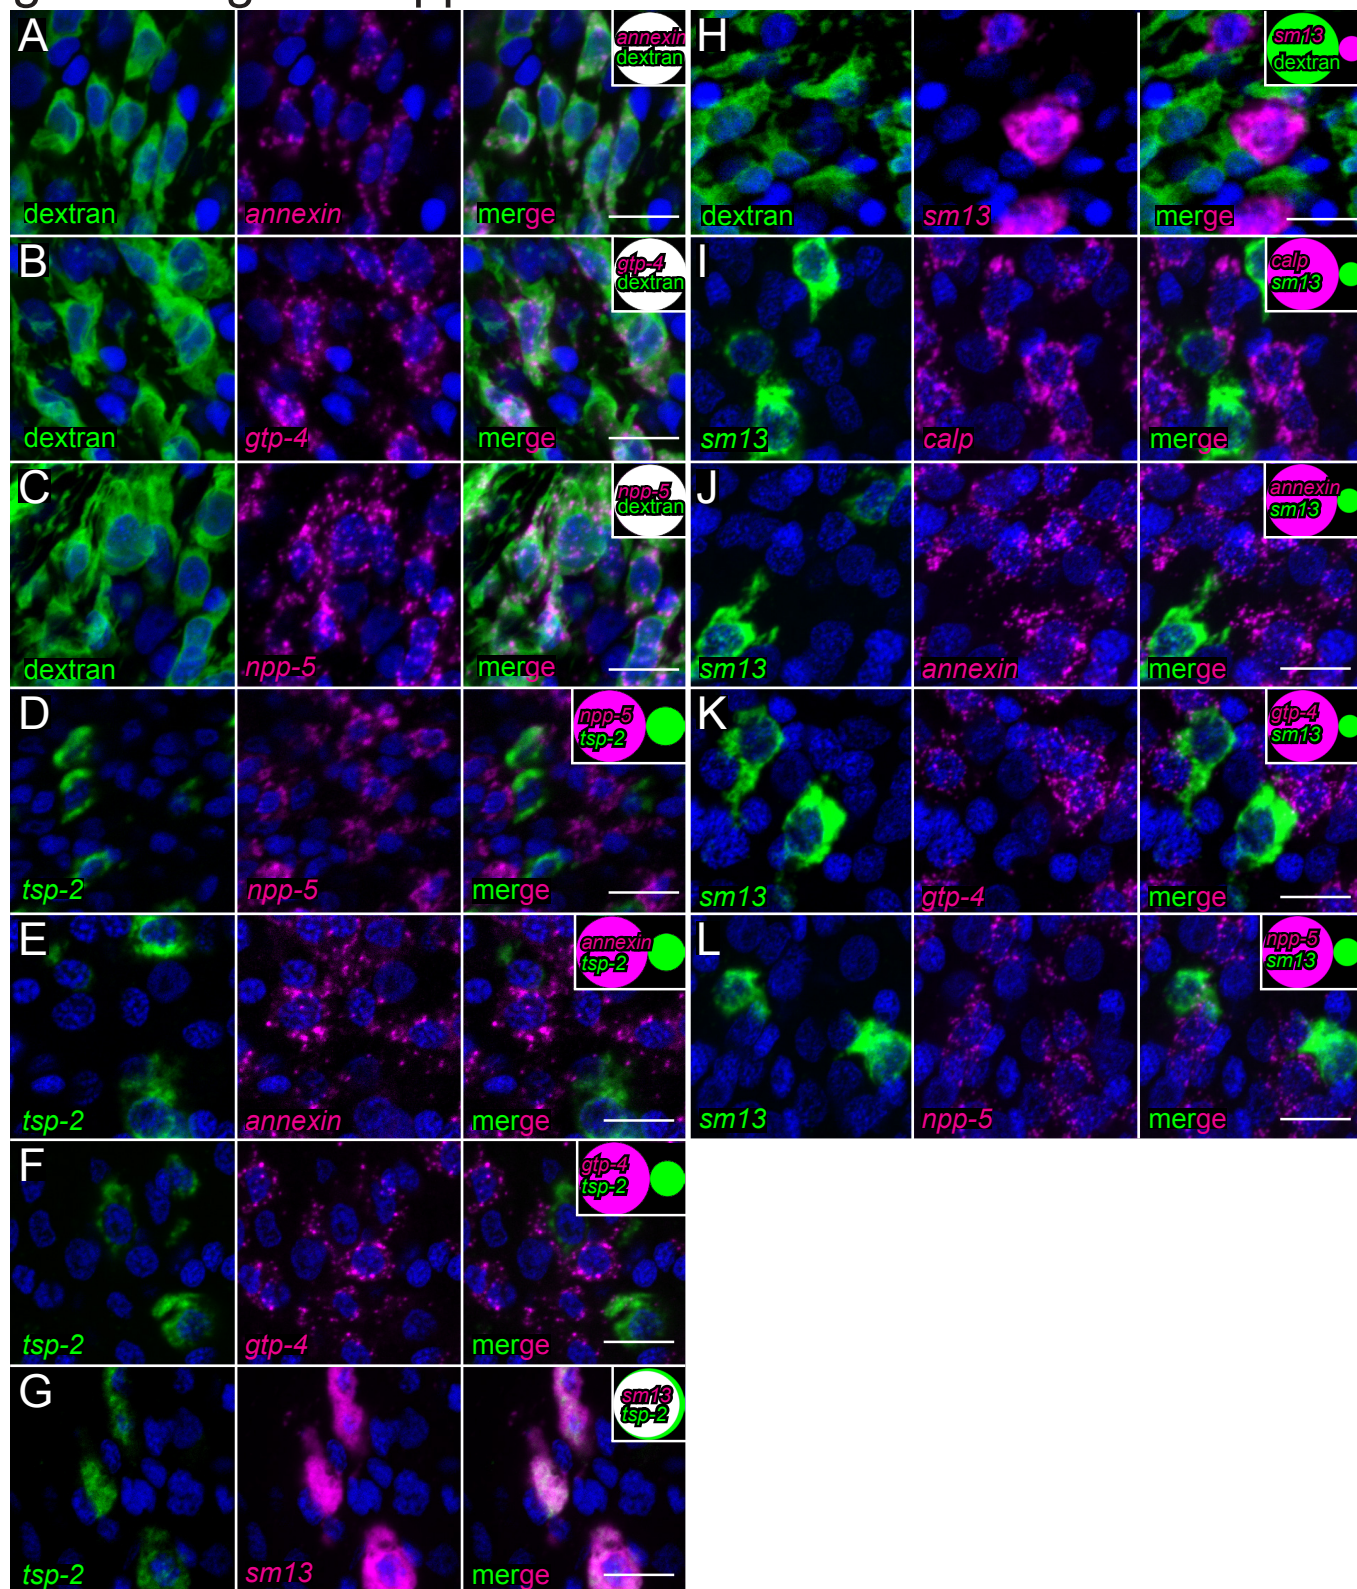

Supplement: supp [file elife_poa_e33221_Figure_1_figure_supplement_1.pdf › elife_poa_e33221_Figure_1_figure_supplement_1.pdf]

Figure 1-Figure Supplement 2

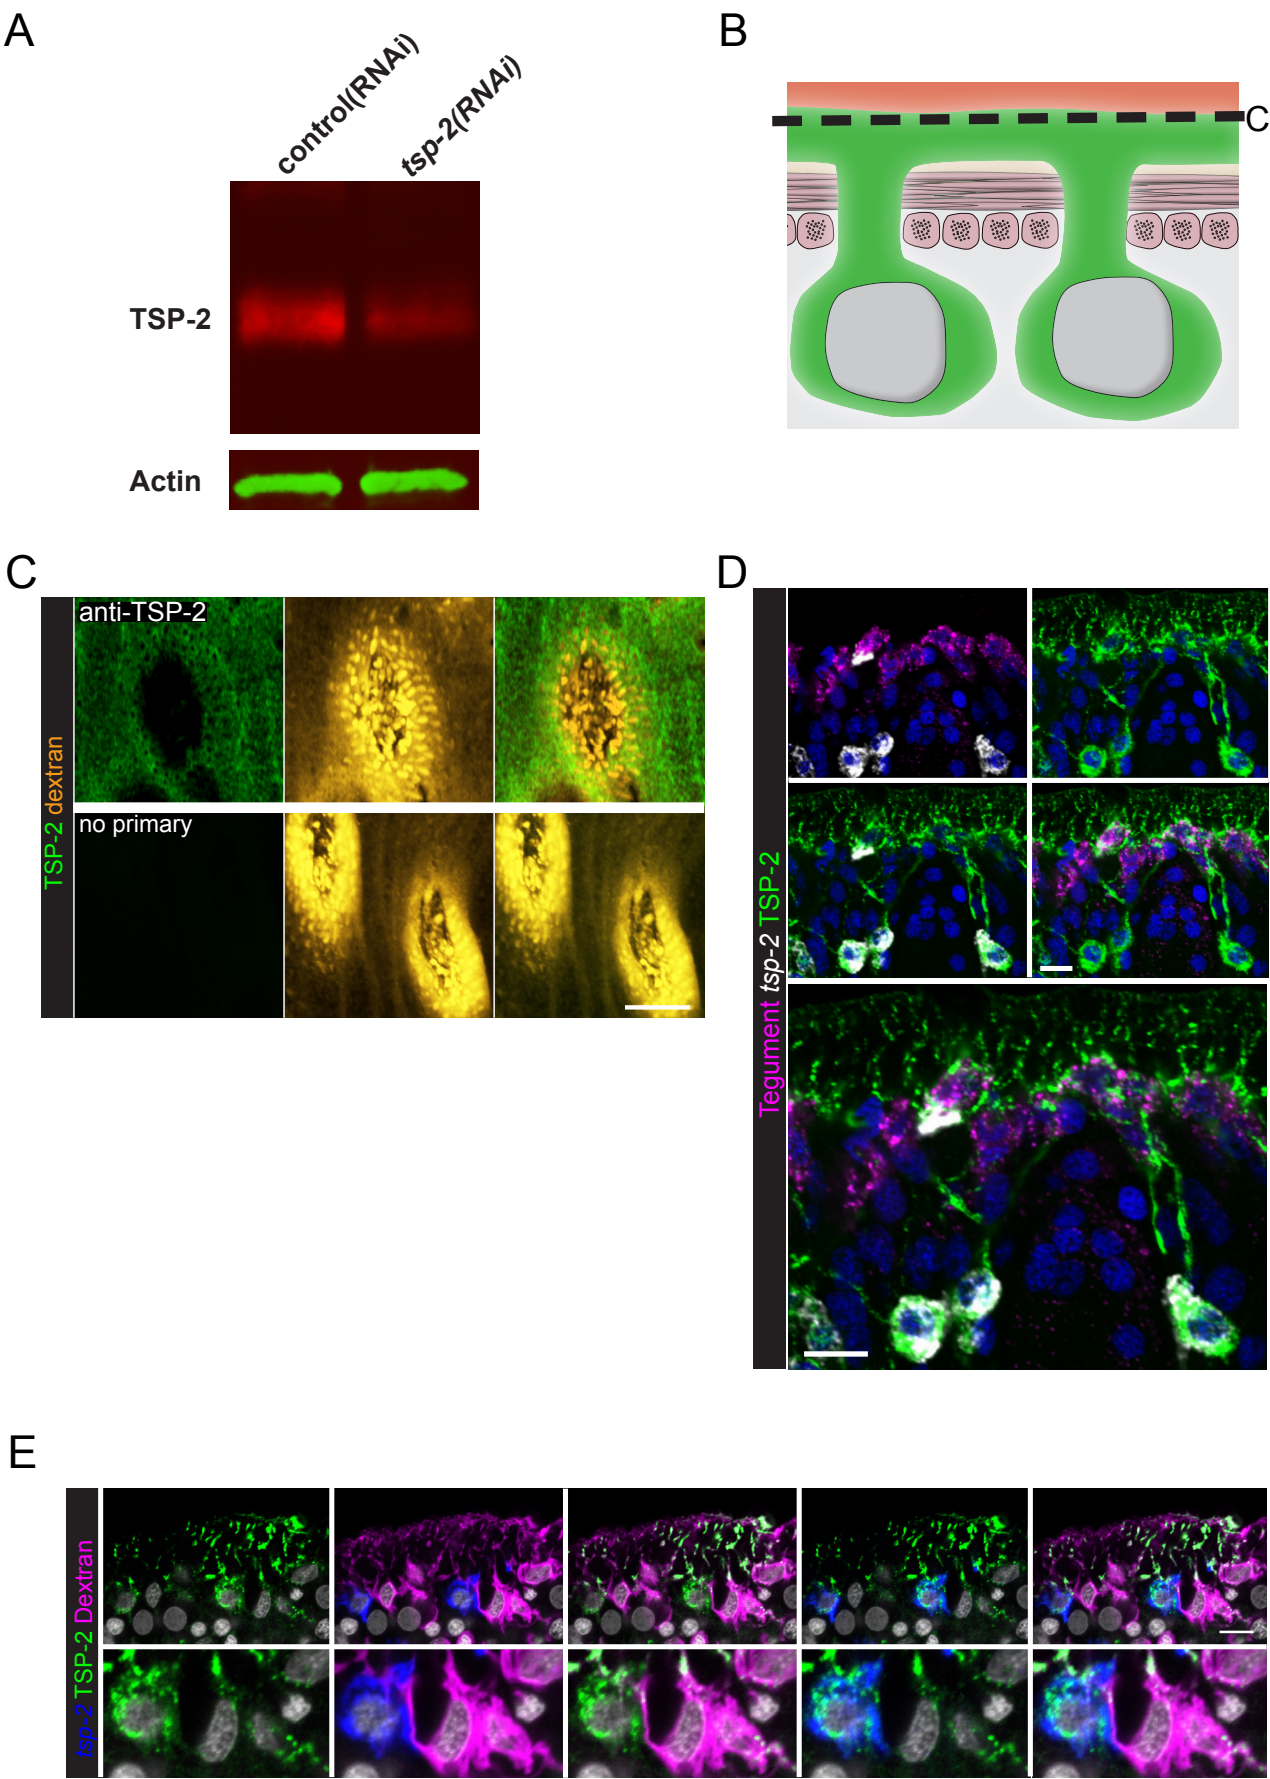

Supplement: supp [file elife_poa_e33221_Figure_1_figure_supplement_2.pdf › elife_poa_e33221_Figure_1_figure_supplement_2.pdf]

Figure 2-Figure Supplement 1

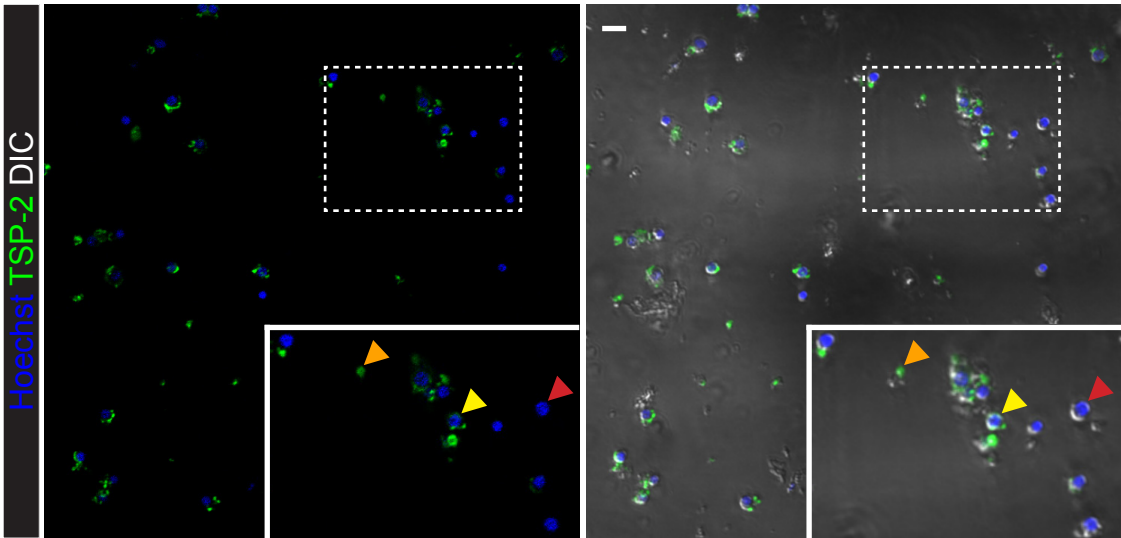

Supplement: supp [file elife_poa_e33221_Figure_2_figure_supplement_1.pdf › elife_poa_e33221_Figure_2_figure_supplement_1.pdf]

Figure 2- Figure Supplement 2

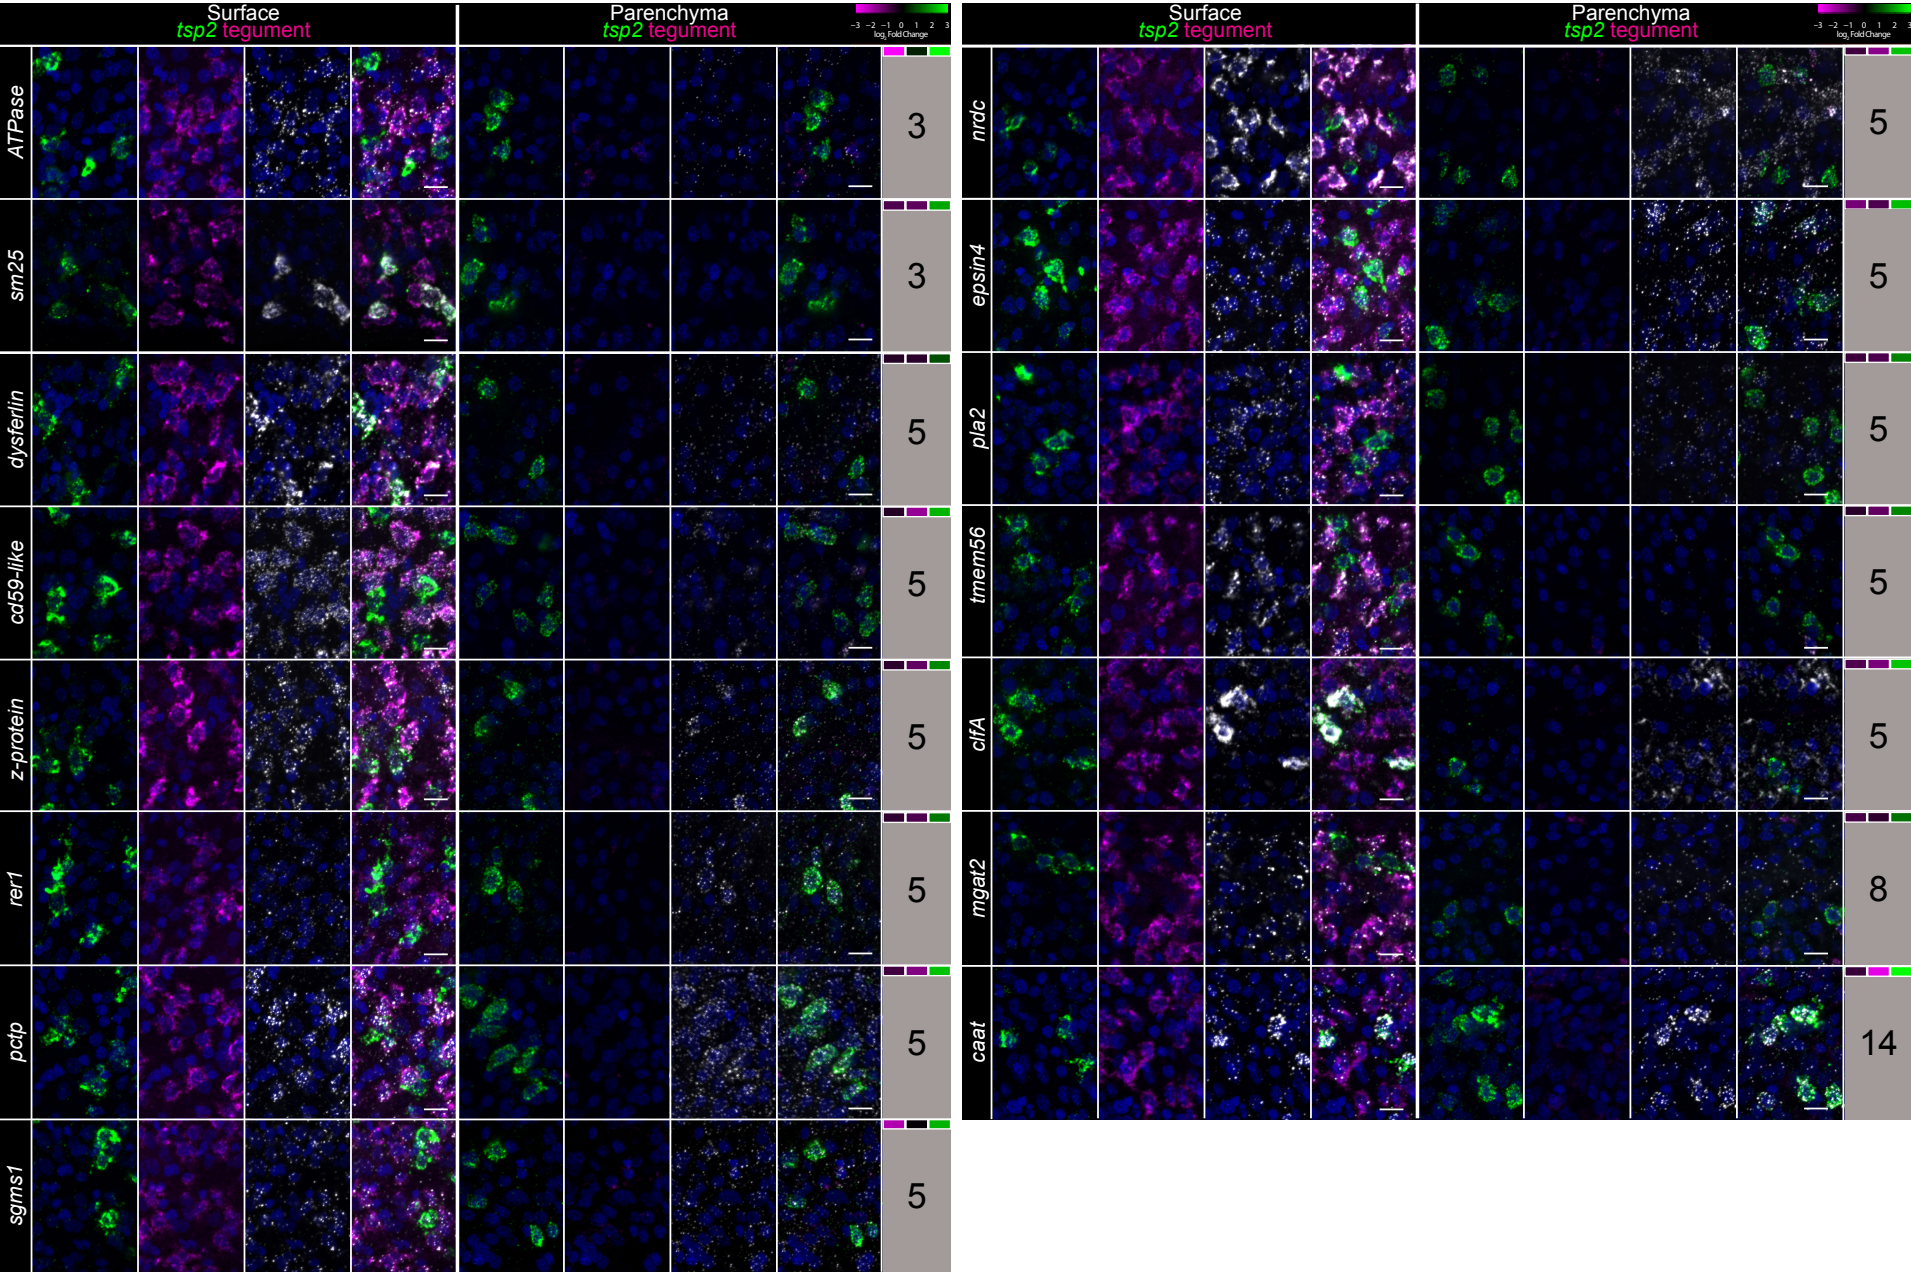

Supplement: supp [file elife_poa_e33221_Figure_2_figure_supplement_2.pdf › elife_poa_e33221_Figure_2_figure_supplement_2.pdf]

Figure 2-Figure Supplement 3

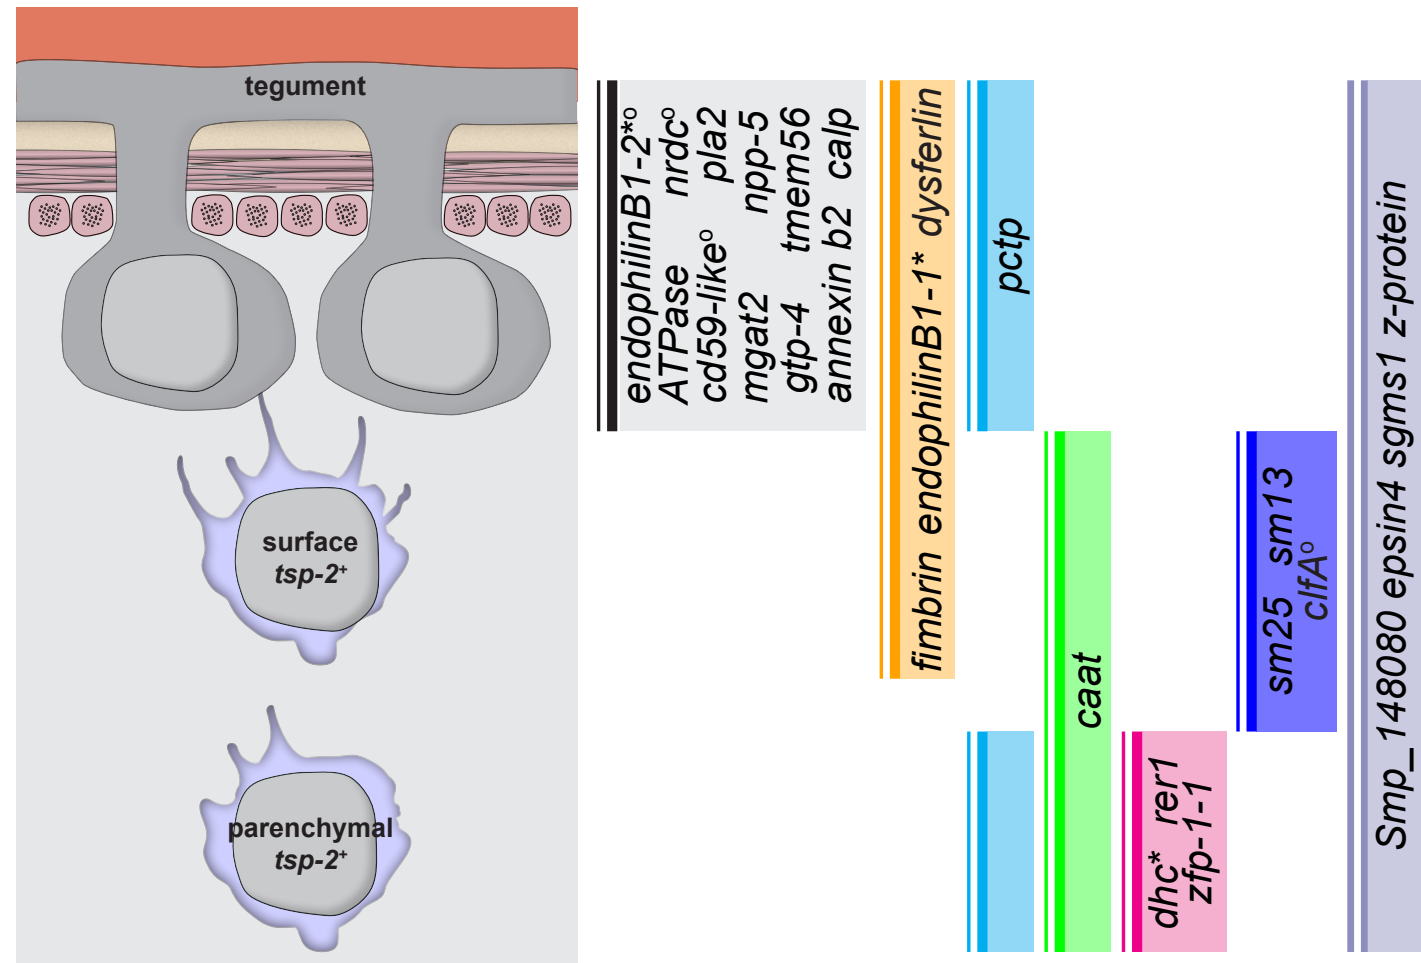

Supplement: supp [file elife_poa_e33221_Figure_2_figure_supplement_3.pdf › elife_poa_e33221_Figure_2_figure_supplement_3.pdf]

Figure 3-Figure Supplement 1

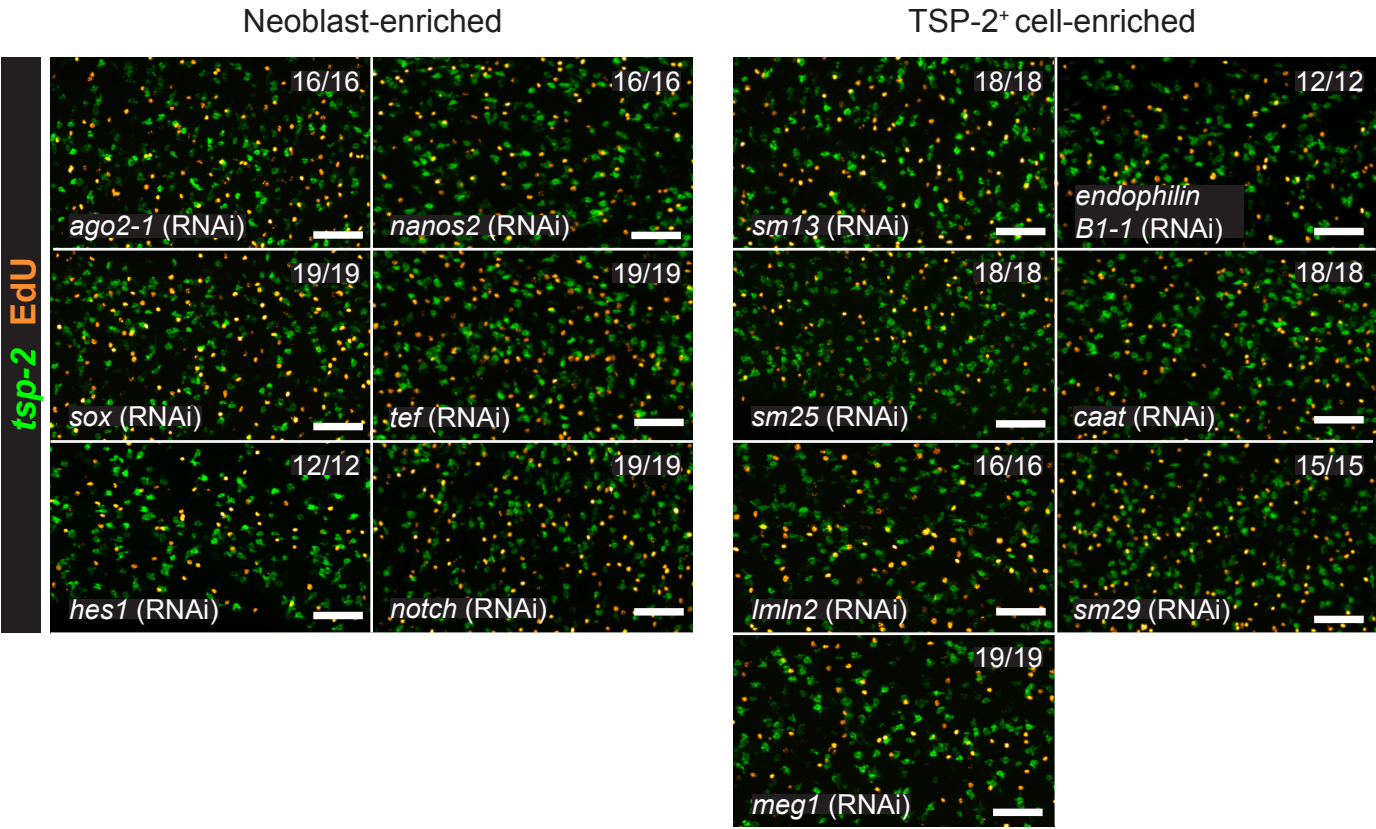

Supplement: supp [file elife_poa_e33221_Figure_3_figure_supplement_1.pdf › elife_poa_e33221_Figure_3_figure_supplement_1.pdf]

Figure 3-Figure Supplement 2

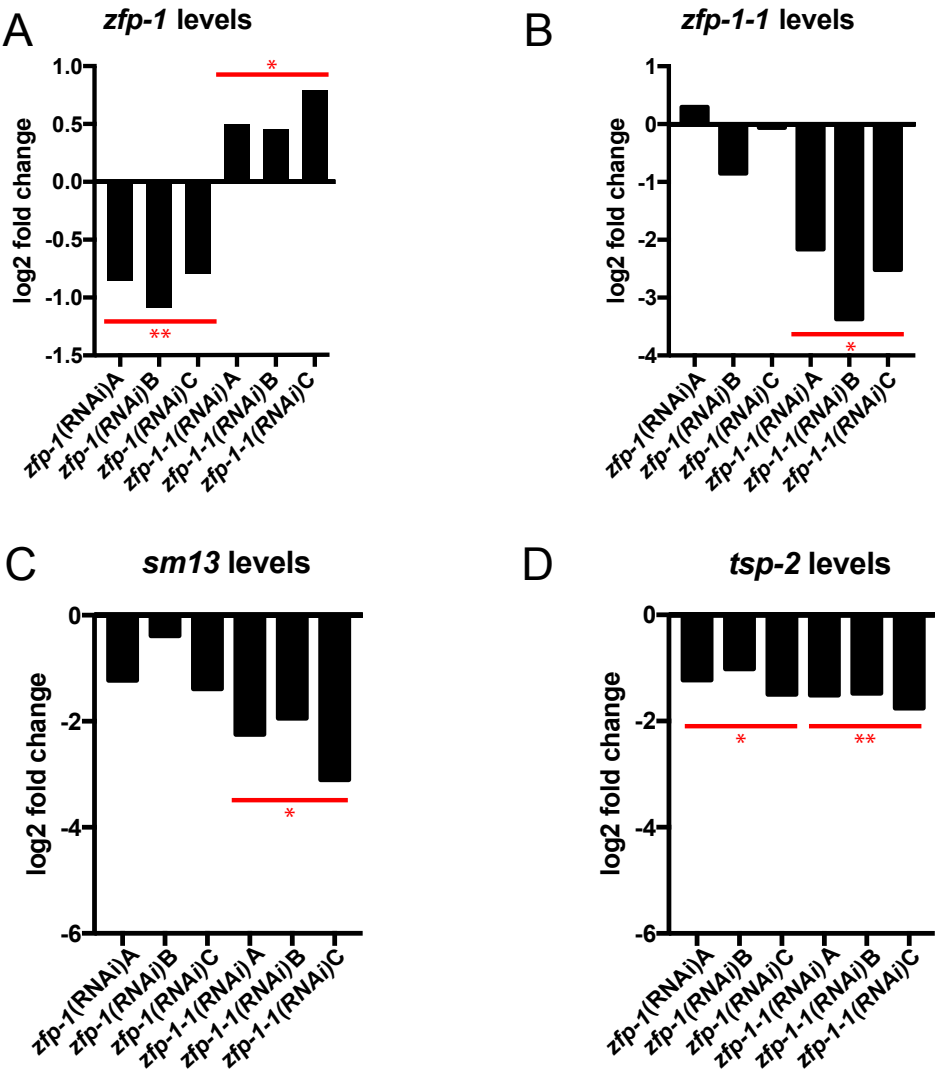

Supplement: supp [file elife_poa_e33221_Figure_3_figure_supplement_2.pdf › elife_poa_e33221_Figure_3_figure_supplement_2.pdf]

# Figure 3-Figure Supplement 3

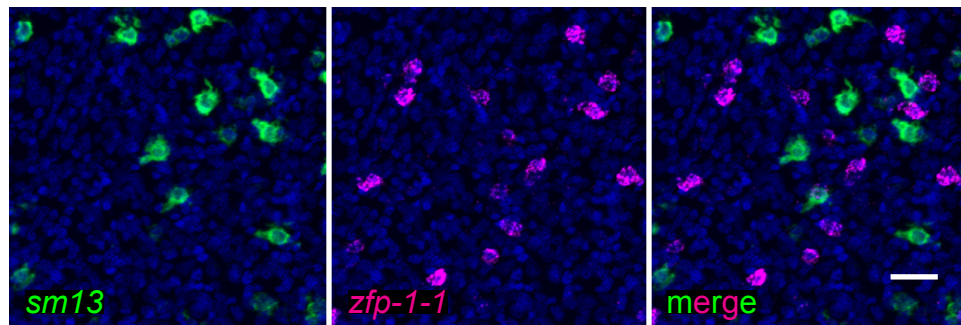

Supplement: supp [file elife_poa_e33221_Figure_3_figure_supplement_3.pdf › elife_poa_e33221_Figure_3_figure_supplement_3.pdf]
